# Supplementary material for: Paraburkholderia phytofirmans PsJN colonization of rice endosphere triggers an atypical transcriptomic response compared to rice native Burkholderia s.l. endophytes
Source: Sci Rep. 2023 Jul 3;13:10696. doi: 10.1038/s41598-023-37314-7 (PMC10317989; doi:10.1038/s41598-023-37314-7)
Supplement: Supplementary file 8 — Supplementary Table S2. [file 41598_2023_37314_MOESM8_ESM.xlsx]

## Sheet: Feuil1
Supplementary Table S2: Rice genes significantly differentially expressed in leaves in response to PsjN root inoculation with an FDR adjusted p-value inferior to 0,01.
	log2FoldChange	padj
Os10g0195250	7.13691	0.000122921			Conserved hypothetical protein.
Os01g0162400	6.11462	7.2076e-19			Conserved hypothetical protein.
Os11g0262600	5.81064	0.00806679			Conserved hypothetical protein.
Os01g0495701	5.45533	0.0028467			Hypothetical conserved gene.
Os03g0431600	5.10292	0.00533664			Hypothetical conserved gene.
Os01g0647200	4.61114	0.00401806			Hypothetical conserved gene.
Os01g0162300	4.31751	6.44043e-21			Leucine-rich repeat, plant specific containing protein.	Molecular Function: protein binding (GO:0005515)
Os07g0677400	3.10858	2.38071e-26	POX5.1, prx113, POX5	PEROXIDASE 5.1	Peroxidase.	Biological Process: response to oxidative stress (GO:0006979), Biological Process: oxidation-reduction process (GO:0055114), Molecular Function: peroxidase activity (GO:0004601), Molecular Function: heme binding (GO:0020037)
Os01g0162200	3.05741	5.29431e-29			Leucine-rich repeat domain containing protein.	Molecular Function: protein binding (GO:0005515)
Os07g0112700	3.05659	3.40869e-05	OsENODL19	EARLY NODULIN LIKE PROTEIN 19	Cupredoxin domain containing protein.	Molecular Function: copper ion binding (GO:0005507), Molecular Function: electron carrier activity (GO:0009055)
Os10g0562900	2.73026	6.30735e-08	DERF12, OsDERF12, OsERF#096, OsERF096, OsERF96, AP2/EREBP#116, AP2/EREBP116, OsAP2, OsAP2.1, OsAP2.2	ETHYLENE RESPONSE FACTOR 96	Non-protein coding transcript.
Os06g0474600	2.66653	6.05007e-07			Hypothetical conserved gene.	Biological Process: proteolysis (GO:0006508), Molecular Function: cysteine-type peptidase activity (GO:0008234)
Os06g0109200	2.60907	0.00064808			Protein of unknown function DUF6, transmembrane domain containing protein.	Cellular Component: membrane (GO:0016020)
Os04g0688300	2.51827	3.85638e-09	prx61	0	Haem peroxidase, plant/fungal/bacterial family protein.	Biological Process: response to oxidative stress (GO:0006979), Biological Process: oxidation-reduction process (GO:0055114), Molecular Function: peroxidase activity (GO:0004601), Molecular Function: heme binding (GO:0020037)
Os02g0178800	2.51167	4.43443e-07	OsGL1-2	0	Glossy1(GL1) homolog, Cuticular wax biosynthesis, Drought resistance	Biological Process: fatty acid biosynthetic process (GO:0006633), Biological Process: oxidation-reduction process (GO:0055114), Molecular Function: iron ion binding (GO:0005506), Molecular Function: oxidoreductase activity (GO:0016491)
Os03g0133300	2.50896	9.44425e-37		Starch metabolism	Similar to F7F22.5.
Os06g0696600	2.50504	5.39355e-39	OsXTH12	XYLOGLUCAN ENDOTRANSGLUCOSYLASE/HYDROLASE 12	Similar to Xyloglucan endo-transglycosylase homolog.	Biological Process: carbohydrate metabolic process (GO:0005975), Biological Process: cellular glucan metabolic process (GO:0006073), Cellular Component: cell wall (GO:0005618), Cellular Component: apoplast (GO:0048046), Molecular Function: hydrolase activity, hydrolyzing O-glycosyl compounds (GO:0004553), Molecular Function: xyloglucan:xyloglucosyl transferase activity (GO:0016762)
Os09g0455300	2.46297	1.54114e-09	OsbHLH120, bHLH120	0	Similar to INDEHISCENT protein.
Os09g0451000	2.44724	0.000141726	OsACO2	AMINOCYCLOPROPANE-1-CARBOXYLIC ACID OXIDASE 2	ACC oxidase, Ethylene biosynthesis	Biological Process: oxidation-reduction process (GO:0055114), Molecular Function: oxidoreductase activity (GO:0016491), Molecular Function: oxidoreductase activity, acting on paired donors, with incorporation or reduction of molecular oxygen, 2-oxoglutarate as one donor, and incorporation of one atom each of oxygen into both donors (GO:0016706)
Os01g0892800	2.41096	2.00808e-11	OsSTA40	0	Similar to Ankyrin-kinase.	Biological Process: protein phosphorylation (GO:0006468), Biological Process: regulation of signal transduction (GO:0009966), Molecular Function: protein kinase activity (GO:0004672), Molecular Function: protein serine/threonine kinase activity (GO:0004674), Molecular Function: protein tyrosine kinase activity (GO:0004713), Molecular Function: protein binding (GO:0005515), Molecular Function: ATP…
Os05g0496100	2.40752	2.87566e-09			Translation initiation factor eIF3 subunit domain containing protein.
Os10g0109600	2.38883	3.47661e-06	poxA, prx126, prxRPA, RPA	PEROXIDASE A	Peroxidase (EC 1.11.1.7).	Biological Process: response to oxidative stress (GO:0006979), Biological Process: oxidation-reduction process (GO:0055114), Molecular Function: peroxidase activity (GO:0004601), Molecular Function: heme binding (GO:0020037)
Os01g0111100	2.37502	1.42561e-06	OsCYP26-2, OsCYP-1, OsCYP26-1	CYCLOPHILIN 26-2	Cyclophilin-like domain containing protein.	Biological Process: protein folding (GO:0006457), Molecular Function: peptidyl-prolyl cis-trans isomerase activity (GO:0003755)
Os11g0112000	2.3741	1.8142e-06	OsHIGD3		Similar to Hypoxia induced protein conserved region containing protein, expressed.
Os01g0750500	2.3536	3.50428e-11			Protein of unknown function DUF814 domain containing protein.
Os10g0554200	2.3501	2.18089e-18			TGF-beta receptor, type I/II extracellular region family protein.	Biological Process: oligopeptide transport (GO:0006857), Cellular Component: membrane (GO:0016020), Molecular Function: transporter activity (GO:0005215)
Os04g0612500	2.34124	1.17324e-07			Similar to 36.4 kDa proline-rich protein.	Biological Process: lipid transport (GO:0006869)
Os05g0537100	2.32683	1.07223e-06	OsWRKY7	TRANSCRIPTION FACTOR WRKY7	WRKY transcription factor 10.	Biological Process: regulation of transcription, DNA-dependent (GO:0006355), Molecular Function: sequence-specific DNA binding transcription factor activity (GO:0003700), Molecular Function: sequence-specific DNA binding (GO:0043565)
Os02g0654700	2.2551	3.54929e-08	OsERF#091, OsERF091, OsERF91, AP59, OsAP59, AP2/EREBP#147, AP2/EREBP147, OsBIERF3, BIERF3	ETHYLENE-RESPONSIVE ELEMENT-BINDING FACTOR 91	AP2/ERF family protein, Abiotic stress response
Os06g0235500	2.24757	2.50744e-08			Conserved hypothetical protein.
Os01g0123700	2.23265	0.000259047			Zinc finger, RING-type domain containing protein.	Biological Process: ubiquitin-dependent protein catabolic process (GO:0006511), Biological Process: multicellular organismal development (GO:0007275), Biological Process: protein ubiquitination (GO:0016567), Cellular Component: nucleus (GO:0005634), Molecular Function: ubiquitin-protein ligase activity (GO:0004842), Molecular Function: protein binding (GO:0005515), Molecular Function: zinc ion bi…
Os03g0736900	2.22492	0.000487969			Similar to Sorghum bicolor protein targeted either to mitochondria or chloroplast proteins T50848.
Os04g0457000	2.20541	0.0018068	CP24, Lhcb6	0	Similar to Chlorophyll a/b-binding protein CP24, photosystem II (Fragment).
Os08g0126700	2.20427	3.50656e-17	OsC3H54	ZINC FINGER CCCH DOMAIN-CONTAINING PROTEIN 54	Nucleotide-binding, alpha-beta plait domain containing protein.	Molecular Function: nucleotide binding (GO:0000166), Molecular Function: nucleic acid binding (GO:0003676), Molecular Function: zinc ion binding (GO:0008270)
Os06g0729400	2.19724	2.0883e-07			Similar to Gibberellin-regulated protein 2 precursor.
Os04g0604200	2.17318	7.27914e-07	OsXTH6	XYLOGLUCAN ENDOTRANSGLUCOSYLASE/HYDROLASE 6	Similar to Xyloglucan endotransglycosylase (Fragment).	Biological Process: carbohydrate metabolic process (GO:0005975), Biological Process: cellular glucan metabolic process (GO:0006073), Cellular Component: cell wall (GO:0005618), Cellular Component: apoplast (GO:0048046), Molecular Function: hydrolase activity, hydrolyzing O-glycosyl compounds (GO:0004553), Molecular Function: xyloglucan:xyloglucosyl transferase activity (GO:0016762)
Os07g0563400	2.13166	1.04052e-07			Protein of unknown function DUF761, plant family protein.
Os08g0189200	2.09279	0.00987983	OsGLP8-3, GER2	GERMIN-LIKE PROTEIN 8-3	Germin-like protein 8-3, Disease resistance	Cellular Component: apoplast (GO:0048046), Molecular Function: manganese ion binding (GO:0030145), Molecular Function: nutrient reservoir activity (GO:0045735)
Os02g0251900	2.07139	7.06134e-05	OsVQ7	0	Similar to Tobacco rattle virus-induced protein variant 2.
Os06g0215100	2.0676	0.000403028			Protein of unknown function DUF1645 family protein.
Os12g0527301	2.05508	9.65876e-05			Hypothetical gene.
Os05g0375400	2.03836	1.14411e-17	OsPR2, Gns1, OsEGL1	0	Beta-glucanase precursor.	Biological Process: carbohydrate metabolic process (GO:0005975), Molecular Function: catalytic activity (GO:0003824), Molecular Function: hydrolase activity, hydrolyzing O-glycosyl compounds (GO:0004553), Molecular Function: cation binding (GO:0043169)
Os06g0698748	2.0291	6.55109e-14	OsO3L7		Similar to cDNA clone:J023083M02, full insert sequence.
Os03g0333400	2.0194	0.000807154			Similar to photosystem II 11 kD protein.
Os04g0604000	2.01475	1.2071e-07	VLN4, OsVLN4, Os VLN4	0	Similar to Actin filament bundling protein P-115-ABP.	Biological Process: cytoskeleton organization (GO:0007010), Molecular Function: actin binding (GO:0003779)
Os01g0247600	2.01214	5.73185e-10			Conserved hypothetical protein.
Os01g0909400	2.00484	9.40863e-17			Protein of unknown function DUF868, plant family protein.
Os03g0210500	1.99076	1.15485e-07			Protein of unknown function DUF538 family protein.
Os09g0449700	1.99053	0.000232649			Hypothetical gene.
Os06g0498800	1.94826	0.000324158	OsMFT1	0	Similar to MOTHER of FT and TF1 protein.
Os01g0221000	1.94337	5.48919e-08			Hypothetical protein.
Os01g0962100	1.94254	1.10758e-05			Conserved hypothetical protein.
Os04g0606200	1.93054	1.63774e-28			Similar to OSIGBa0113I13.1 protein.
Os01g0956200	1.93025	1.09142e-11	0	0	Glycosyltransferase AER61, uncharacterized domain containing protein.	Molecular Function: transferase activity, transferring glycosyl groups (GO:0016757)
Os10g0544600	1.92319	1.45534e-17			Zinc finger, RING/FYVE/PHD-type domain containing protein.	Molecular Function: protein binding (GO:0005515), Molecular Function: zinc ion binding (GO:0008270)
Os03g0275300	1.91782	6.74254e-12			Hypothetical conserved gene.	Molecular Function: protein binding (GO:0005515), Molecular Function: zinc ion binding (GO:0008270)
Os05g0131500	1.9023	0.000102797			Ferroporti-1 domain containing protein.	Biological Process: iron ion transmembrane transport (GO:0034755), Cellular Component: integral to membrane (GO:0016021), Molecular Function: iron ion transmembrane transporter activity (GO:0005381)
Os01g0600900	1.89927	0.00592122	cab2R, CAB-2, OsLhcp, Lhcb1	CHLOROPHYLL A/B BINDING PROTEIN 2R	Chlorophyll a-b binding protein 2, chloroplast precursor (LHCII type I CAB-2) (LHCP).	Biological Process: photosynthesis, light harvesting (GO:0009765), Cellular Component: membrane (GO:0016020)
Os03g0604566	1.88094	0.00278303			Conserved hypothetical protein.
Os03g0364700	1.87785	1.92708e-26			Transcription elongation factor, TFIIS/CRSP70, N-terminal domain containing protein.	Biological Process: transcription, DNA-dependent (GO:0006351), Cellular Component: nucleus (GO:0005634), Molecular Function: DNA binding (GO:0003677)
Os02g0637200	1.86655	3.46798e-09			Conserved hypothetical protein.
Os02g0257400	1.85952	0.00753714			Non-protein coding transcript.
Os02g0523800	1.8586	3.12701e-16	OsIPK2, IPK2, IP6K	0	Inositol polyphosphate kinase, Auxin signaling, Regulation of lateral root development	Molecular Function: inositol-1, 4,5-trisphosphate 3-kinase activity (GO:0008440)
Os03g0119300	1.85856	0.00302048	OsSub25, SUB25	0	Peptidase S8, subtilisin-related domain containing protein.	Biological Process: proteolysis (GO:0006508), Biological Process: negative regulation of catalytic activity (GO:0043086), Molecular Function: serine-type endopeptidase activity (GO:0004252), Molecular Function: identical protein binding (GO:0042802)
Os07g0182400	1.84753	8.35429e-09	OsIAA24	0	AUX/IAA protein family protein.	Biological Process: regulation of transcription, DNA-dependent (GO:0006355), Cellular Component: nucleus (GO:0005634), Molecular Function: protein dimerization activity (GO:0046983)
Os04g0635700	1.84166	4.63249e-08			Aldehyde dehydrogenase, conserved site domain containing protein.
Os01g0848700	1.83305	0.00103708	OsSTA36	0	Similar to Ras-related protein Rab11C.	Biological Process: GTP catabolic process (GO:0006184), Biological Process: intracellular protein transport (GO:0006886), Biological Process: nucleocytoplasmic transport (GO:0006913), Biological Process: signal transduction (GO:0007165), Biological Process: small GTPase mediated signal transduction (GO:0007264), Biological Process: protein transport (GO:0015031), Cellular Component: intracellular…
Os06g0612900	1.82029	2.82457e-08			Similar to predicted protein.
Os06g0607100	1.81364	7.66116e-05			Similar to phosphatidic acid phosphatase-related / PAP2-related.
Os05g0468900	1.78806	0.00116696			Zinc finger, RING/FYVE/PHD-type domain containing protein.	Molecular Function: protein binding (GO:0005515), Molecular Function: zinc ion binding (GO:0008270)
Os06g0666400	1.78166	7.04303e-08	OsVQ25	0	VQ domain containing protein.
Os02g0126600	1.78087	3.28359e-08			Conserved hypothetical protein.
Os02g0703600	1.77583	1.12688e-07	OsABA8OX1, CYP707A5, OsCYP707A5, ABA8ox1, OsABA8ox1	ABA-8'-HYDROXYLASE 1	Similar to Abscisic acid 8'-hydroxylase 1.	Biological Process: oxidation-reduction process (GO:0055114), Molecular Function: iron ion binding (GO:0005506), Molecular Function: electron carrier activity (GO:0009055), Molecular Function: oxidoreductase activity, acting on paired donors, with incorporation or reduction of molecular oxygen (GO:0016705), Molecular Function: heme binding (GO:0020037)
Os02g0731700	1.76995	4.72828e-30	OsBBX8, OsK, OsCCT09, Ghd2, OsK/Ghd2	0	CCT domain domain containing protein.	Molecular Function: protein binding (GO:0005515)
Os02g0105400	1.75854	7.80314e-12	LDH	LACTATE DEHYDROGENASE	Similar to L-lactate dehydrogenase A (EC 1.1.1.27) (LDH-A).	Biological Process: carbohydrate metabolic process (GO:0005975), Biological Process: glycolysis (GO:0006096), Biological Process: cellular carbohydrate metabolic process (GO:0044262), Biological Process: oxidation-reduction process (GO:0055114), Cellular Component: cytoplasm (GO:0005737), Molecular Function: nucleotide binding (GO:0000166), Molecular Function: catalytic activity (GO:0003824), Mol…
Os02g0581100	1.75752	6.49032e-05			Similar to photosystem II 5 kD protein.
Os04g0391500	1.74887	6.4424e-16	OsACR6	ACT DOMAIN REPEAT PROTEIN 6	Similar to ACR4.	Biological Process: metabolic process (GO:0008152), Molecular Function: amino acid binding (GO:0016597)
Os03g0400700	1.74519	7.33286e-06	OsLEA11	LATE EMBRYOGENESIS ABUNDANT PROTEIN 11	Similar to retrotransposon protein.	Biological Process: response to stress (GO:0006950)
Os02g0787300	1.74388	2.05129e-14	OsMKK4, MKK4, OsMKK4/SMG1, OsMAPKK4, MAPKK4	MITOGEN-ACTIVATED PROTEIN KINASE KINASE 4	Mitogen-activated protein kinase kinase 4, Defense response, Cell proliferation, Grain growth	Biological Process: protein phosphorylation (GO:0006468), Molecular Function: protein kinase activity (GO:0004672), Molecular Function: protein serine/threonine kinase activity (GO:0004674), Molecular Function: ATP binding (GO:0005524), Molecular Function: transferase activity, transferring phosphorus-containing groups (GO:0016772)
Os07g0277200	1.73941	0.000185202			Conserved hypothetical protein.
Os06g0263801	1.73173	2.46439e-15			Hypothetical gene.
Os11g0550800	1.72479	6.90212e-07			Similar to plastid-specific ribosomal protein 6.	Biological Process: translation (GO:0006412), Cellular Component: ribosome (GO:0005840), Cellular Component: chloroplast (GO:0009507), Molecular Function: structural constituent of ribosome (GO:0003735), Molecular Function: rRNA binding (GO:0019843)
Os03g0281500	1.7233	9.32735e-09	OsCrRLK1L7	0	Catharanthus roseus receptor-like kinase1-like kinase	Biological Process: protein phosphorylation (GO:0006468), Molecular Function: protein kinase activity (GO:0004672), Molecular Function: ATP binding (GO:0005524)
Os02g0254600	1.72306	6.55109e-14			Conserved hypothetical protein.
Os01g0310550	1.72289	1.87264e-14			Non-protein coding transcript.
Os12g0291400	1.71849	8.54599e-05	RbcS5, OsRBCS5, OsRbcS5	0	Similar to Petunia ribulose 1, 5-bisphosphate carboxylase small subunit mRNA (clone pSSU 51), partial cds. (Fragment).
Os06g0699800	1.71776	4.64012e-05			ENTH/VHS domain containing protein.	Biological Process: clathrin coat assembly (GO:0048268), Cellular Component: clathrin coat (GO:0030118), Molecular Function: phospholipid binding (GO:0005543), Molecular Function: 1-phosphatidylinositol binding (GO:0005545), Molecular Function: clathrin binding (GO:0030276)
Os12g0274700	1.71555	0.00028671	rbcS, RBCS-C, RbcS2, OsRBCS2, RbcS1, OsRbcS2, OsrbcS1	RUBISCO SMALL SUBUNIT	Similar to Petunia ribulose 1, 5-bisphosphate carboxylase small subunit mRNA (clone pSSU 51), partial cds. (Fragment).
Os08g0394000	1.71208	4.55417e-11			Conserved hypothetical protein.
Os03g0606100	1.70903	2.14903e-13			Similar to predicted protein.
Os06g0128800	1.70427	0.000475576			C2 calcium/lipid-binding domain, CaLB domain containing protein.	Molecular Function: protein binding (GO:0005515)
Os05g0592300	1.70258	0.000963359			Protein of unknown function DUF1637 family protein.	Biological Process: oxidation-reduction process (GO:0055114), Molecular Function: cysteamine dioxygenase activity (GO:0047800)
Os04g0641101	1.70088	0.000197953			Non-protein coding transcript.
Os04g0568600	1.70062	6.23982e-05			Similar to 6-phospho-3-hexuloisomerase.	Biological Process: carbohydrate metabolic process (GO:0005975), Molecular Function: sugar binding (GO:0005529)
Os06g0295900	1.69268	1.38955e-12			Hypothetical conserved gene.
Os01g0130900	1.68753	0.000156562			Conserved hypothetical protein.
Os01g0290700	1.68685	1.00969e-06	OsABCB1, ABCB1, OsPGP1, OsMDR4	MULTIDRUG RESISTANCE 4	Similar to CjMDR1.	Molecular Function: ATP binding (GO:0005524), Molecular Function: ATPase activity (GO:0016887)
Os05g0439000	1.68558	6.35829e-08			Similar to RING-H2 finger protein ATL1O (RING-H2 finger protein ATL11).	Molecular Function: protein binding (GO:0005515), Molecular Function: zinc ion binding (GO:0008270)
Os05g0344200	1.68527	6.62084e-19			Conserved hypothetical protein.
Os06g0641800	1.68277	3.6394e-05			Cytochrome P450 family protein.	Biological Process: oxidation-reduction process (GO:0055114), Molecular Function: iron ion binding (GO:0005506), Molecular Function: electron carrier activity (GO:0009055), Molecular Function: oxidoreductase activity, acting on paired donors, with incorporation or reduction of molecular oxygen (GO:0016705), Molecular Function: heme binding (GO:0020037)
Os05g0390300	1.67809	1.25718e-09			Conserved hypothetical protein.
Os02g0173200	1.6757	5.50925e-12	OsVQ5	0	VQ domain containing protein.
Os06g0206401	1.67555	3.77067e-05			Similar to H0523F07.7 protein.
Os03g0184550	1.66784	1.43155e-06			Similar to Dihydroflavonol-4-reductase.	Biological Process: cellular metabolic process (GO:0044237), Molecular Function: nucleotide binding (GO:0000166), Molecular Function: catalytic activity (GO:0003824), Molecular Function: coenzyme binding (GO:0050662)
Os03g0343900	1.66515	9.89264e-05	PsbX	0	Photosystem II PsbX domain containing protein.	Biological Process: photosynthesis (GO:0015979), Cellular Component: photosystem II (GO:0009523), Cellular Component: membrane (GO:0016020)
Os02g0669500	1.66211	3.93377e-06			Similar to H0211B05.7 protein.
Os05g0568300	1.66171	0.00687087			Similar to 50S ribosomal protein L12, chloroplast precursor (CL12).	Biological Process: translation (GO:0006412), Cellular Component: intracellular (GO:0005622), Cellular Component: ribosome (GO:0005840), Molecular Function: structural constituent of ribosome (GO:0003735)
Os02g0184200	1.65577	3.21513e-12			Similar to Vacuolar proton pyrophosphatase.	Biological Process: proton transport (GO:0015992), Cellular Component: membrane (GO:0016020), Molecular Function: inorganic diphosphatase activity (GO:0004427), Molecular Function: hydrogen-translocating pyrophosphatase activity (GO:0009678)
Os05g0491200	1.64429	1.26633e-17	akin-b, akin-beta	0	Similar to SNF1 kinase complex anchoring protein (Fragment).	Molecular Function: protein binding (GO:0005515)
Os05g0579500	1.64247	0.000378002			Similar to 10A19I.7.
Os10g0502000	1.62723	5.90727e-11			Similar to Thylakoid lumenal 17.4 kDa protein (P17.4) (Fragment).
Os05g0439100	1.62386	1.30361e-06			Similar to Transcription factor MYC7E (Fragment).
Os02g0578400	1.61995	1.01132e-07			Photosystem II oxygen evolving complex protein PsbQ family protein.	Biological Process: photosynthesis (GO:0015979), Cellular Component: photosystem II (GO:0009523), Cellular Component: oxygen evolving complex (GO:0009654), Cellular Component: extrinsic to membrane (GO:0019898), Molecular Function: calcium ion binding (GO:0005509)
Os02g0744600	1.61635	4.74567e-09	OsCslA6, OsCSLA6	CELLULOSE SYNTHASE LIKE A6	Hypothetical conserved gene.	0
Os01g0906000	1.61618	3.63043e-06			Similar to Ceramide glucosyltransferase.	0
Os07g0694300	1.6151	6.44714e-05	prx116	0	Similar to Peroxidase.	Biological Process: response to oxidative stress (GO:0006979), Biological Process: oxidation-reduction process (GO:0055114), Molecular Function: peroxidase activity (GO:0004601), Molecular Function: heme binding (GO:0020037)
Os03g0778100	1.61475	1.62937e-08	PsaF	0	Similar to Photosystem-1 F subunit.	Biological Process: photosynthesis (GO:0015979), Cellular Component: photosystem I (GO:0009522), Cellular Component: photosystem I reaction center (GO:0009538)
Os12g0428000	1.61071	0.000836526	STR7	SULFURTRANSFERASE 7	Similar to senescence-associated protein DIN1.	0
Os03g0769800	1.60856	3.98941e-08			Similar to Homeodomain-leucine zipper protein interfascicular fiberless 1 (Revoluta).	Biological Process: regulation of transcription, DNA-dependent (GO:0006355), Molecular Function: DNA binding (GO:0003677), Molecular Function: sequence-specific DNA binding transcription factor activity (GO:0003700), Molecular Function: protein binding (GO:0005515), Molecular Function: sequence-specific DNA binding (GO:0043565)
Os01g0837000	1.60525	5.46791e-14	OsNPR4, NPR4	0	Ankyrin repeat containing protein.	Molecular Function: protein binding (GO:0005515)
Os01g0872900	1.6007	0.00105143	Glutathione S-transferase T3		Protein of unknown function DUF635 family protein.	Molecular Function: hydrolase activity, acting on ester bonds (GO:0016788)
Os03g0132200	1.60006	1.30035e-15			Expansin-like protein A.	Cellular Component: extracellular region (GO:0005576)
Os03g0839200	1.59923	3.62894e-07			Multi antimicrobial extrusion protein MatE family protein.	Biological Process: drug transmembrane transport (GO:0006855), Biological Process: transmembrane transport (GO:0055085), Cellular Component: membrane (GO:0016020), Molecular Function: drug transmembrane transporter activity (GO:0015238), Molecular Function: antiporter activity (GO:0015297)
Os08g0495800	1.59766	0.00125168	Osh69	0	Raffinose synthase family protein.	Biological Process: metabolic process (GO:0008152), Molecular Function: catalytic activity (GO:0003824)
Os06g0336200	1.59355	6.03018e-08	OsTIP2;2, TIP2-2	TONOPLAST INTRINSIC PROTEIN 2;2	Delta-tonoplast intrinsic protein.	Biological Process: transport (GO:0006810), Biological Process: water transport (GO:0006833), Biological Process: transmembrane transport (GO:0055085), Cellular Component: membrane (GO:0016020), Cellular Component: integral to membrane (GO:0016021), Molecular Function: transporter activity (GO:0005215)
Os06g0484500	1.58522	1.85611e-10			Conserved hypothetical protein.	0
Os01g0332100	1.58249	6.4424e-16	OsNIN2, CytINV	NEUTRAL/ALKALINE INVERTASE 2	Similar to Neutral invertase-like protein (Fragment).	Molecular Function: catalytic activity (GO:0003824)
Os02g0566000	1.57727	0.00126934			Similar to stem-specific protein TSJT1.	0
Os04g0603900	1.57238	0.000199896			Hypothetical protein.	0
Os07g0559400	1.5642	1.42775e-05			Similar to uncharacterized secreted protein.	0
Os12g0291100	1.56244	5.37884e-11	RbcS3, OsRBCS3, OsRbcS3, rbcS	0	Similar to Petunia ribulose 1, 5-bisphosphate carboxylase small subunit mRNA (clone pSSU 51), partial cds. (Fragment).	0
Os07g0673550	1.56214	4.8725e-11			Photosystem II protein PsbX family protein.	Biological Process: photosynthesis (GO:0015979), Cellular Component: photosystem II (GO:0009523), Cellular Component: membrane (GO:0016020)
Os04g0323500	1.55028	1.17522e-08			Hypothetical protein.	0
Os03g0133400	1.54756	7.19878e-10	CEBIP, Os-LYP1, LYP1, OsCEBiP	CHITIN ELICITOR BINDING PROTEIN	Peptidoglycan-binding Lysin subgroup domain containing protein.	Biological Process: cell wall macromolecule catabolic process (GO:0016998)
Os01g0873100	1.54662	1.4664e-08	0	0	Similar to Amidophosphoribosyltransferase, chloroplast precursor (EC 2.4.2.14) (Glutamine phosphoribosylpyrophosphate amidotransferase) (ATASE) (GPAT).	Biological Process: purine base biosynthetic process (GO:0009113), Molecular Function: amidophosphoribosyltransferase activity (GO:0004044)
Os08g0327100	1.54538	2.26816e-12			Galacturonosyltransferase, Pectin biosynthesis	Molecular Function: transferase activity, transferring glycosyl groups (GO:0016757)
Os08g0504500	1.54454	5.42766e-08			Mog1/PsbP/DUF1795, alpha/beta/alpha sandwich domain containing protein.	Biological Process: photosynthesis (GO:0015979), Cellular Component: photosystem II (GO:0009523), Cellular Component: oxygen evolving complex (GO:0009654), Cellular Component: extrinsic to membrane (GO:0019898), Molecular Function: calcium ion binding (GO:0005509)
Os12g0171250	1.54408	1.13431e-11			Non-protein coding transcript.	0
Os09g0115900	1.54111	4.59904e-09			EF-HAND 1 domain containing protein.	0
Os01g0757200	1.5403	0.00024902	OsGA2ox3, ga2ox 3, OsGA2ox-3, GA2ox3, GA2ox-3	GIBBERELLIN 2-OXIDASE 3	GA 2-oxidase3, GA metabolism	Biological Process: oxidation-reduction process (GO:0055114), Molecular Function: oxidoreductase activity (GO:0016491), Molecular Function: oxidoreductase activity, acting on paired donors, with incorporation or reduction of molecular oxygen, 2-oxoglutarate as one donor, and incorporation of one atom each of oxygen into both donors (GO:0016706)
Os12g0555400	1.53617	0.00133236	0	0	Similar to Raffinose synthase protein.	0
Os09g0503000	1.53329	9.2258e-13			Alcohol dehydrogenase superfamily, zinc-containing protein.	Biological Process: oxidation-reduction process (GO:0055114), Molecular Function: nucleotide binding (GO:0000166), Molecular Function: zinc ion binding (GO:0008270), Molecular Function: oxidoreductase activity (GO:0016491)
Os03g0125600	1.5319	8.52392e-12			Ser Thr specific protein kinase-like protein.	Biological Process: protein phosphorylation (GO:0006468), Molecular Function: protein kinase activity (GO:0004672), Molecular Function: protein serine/threonine kinase activity (GO:0004674), Molecular Function: protein tyrosine kinase activity (GO:0004713), Molecular Function: ATP binding (GO:0005524), Molecular Function: transferase activity, transferring phosphorus-containing groups (GO:0016772)
Os01g0639900	1.52901	0.000636907	OsCA, CA, OsbetaCA1, betaCA1	BETA-CARBONIC ANHYDRASE 1	beta-carbonic anhydrase (EC:4.2.1.1), Carbon assimilation, CO<sub>2</sub>-mediated stomatal pore response	Biological Process: carbon utilization (GO:0015976), Molecular Function: carbonate dehydratase activity (GO:0004089), Molecular Function: zinc ion binding (GO:0008270)
Os06g0690100	1.52567	3.35679e-05	OsSTA177	0	Similar to Pentatricopeptide repeat protein.	0
Os12g0466200	1.51992	5.73729e-20			Conserved hypothetical protein.	0
Os07g0225300	1.51829	1.03091e-05	OsNAC3, NAC67, ONAC067, OnNAC3*, OsNAC3/ONAC067	NAC DOMAIN-CONTAINING PROTEIN 3	OsNAC3 protein.	Biological Process: regulation of transcription, DNA-dependent (GO:0006355), Molecular Function: DNA binding (GO:0003677)
Os01g0579600	1.51804	1.05452e-11	OsCBL9	CALCINEURIN B-LIKE PROTEIN 9	Similar to Calcineurin B-like protein 9.	Molecular Function: calcium ion binding (GO:0005509)
Os02g0253800	1.51564	8.81604e-05			Conserved hypothetical protein.	0
Os12g0520200	1.5142	4.50495e-06	OsPAL03, OsPAL9, TAM1, OsTAM1, TAM, OsTAM	0	Similar to phenylalanine ammonia-lyase.	Biological Process: L-phenylalanine catabolic process (GO:0006559), Biological Process: biosynthetic process (GO:0009058), Cellular Component: cytoplasm (GO:0005737), Molecular Function: catalytic activity (GO:0003824), Molecular Function: ammonia-lyase activity (GO:0016841)
Os02g0690000	1.50847	0.000206485			Conserved hypothetical protein.	0
Os06g0649000	1.50498	3.03431e-05	OsWRKY28	TRANSCRIPTION FACTOR WRKY28	PAMP (pathogen-associated molecular pattern)-responsive transrepressor, Defense response	Biological Process: regulation of transcription, DNA-templated (GO:0006355), Molecular Function: transcription factor activity, sequence-specific DNA binding (GO:0003700), Molecular Function: sequence-specific DNA binding (GO:0043565)
Os06g0157000	1.49909	1.22879e-13	OsGELP79	GDSL ESTERASE/LIPASE PROTEIN 79	Esterase, SGNH hydrolase-type domain containing protein.	Biological Process: lipid metabolic process (GO:0006629), Molecular Function: hydrolase activity (GO:0016787), Molecular Function: hydrolase activity, acting on ester bonds (GO:0016788)
Os03g0726200	1.48943	2.77277e-12	OsITPK3, OsITP5/6K-3, ITP5/6K-3, OsIPK1	INOSITOL 1,3,4-TRISPHOSPHATE 5/6-KINASE 3	Similar to Hydroxyproline-rich glycoprotein DZ-HRGP precursor.	Biological Process: inositol trisphosphate metabolic process (GO:0032957), Cellular Component: intracellular (GO:0005622), Molecular Function: magnesium ion binding (GO:0000287), Molecular Function: ATP binding (GO:0005524), Molecular Function: inositol tetrakisphosphate 1-kinase activity (GO:0047325), Molecular Function: inositol-1, 3,4-trisphosphate 6-kinase activity (GO:0052725), Molecular Fun…
Os02g0668500	1.48901	3.60266e-06			Cellular retinaldehyde-binding/triple function, C-terminal domain containing protein.	0
Os03g0764100	1.48899	2.66384e-16	WZF1	0	Zinc finger transcription factor ZF1.	Cellular Component: intracellular (GO:0005622), Molecular Function: nucleic acid binding (GO:0003676), Molecular Function: zinc ion binding (GO:0008270)
Os12g0637700	1.48775	0.00117391			Nodulin-like domain containing protein.	0
Os10g0563550	1.4846	0.0011378			Similar to Protein kinase domain containing protein, expressed.	Molecular Function: transferase activity, transferring phosphorus-containing groups (GO:0016772)
Os03g0117050	1.48389	1.99748e-06			Non-protein coding transcript.	0
Os03g0828100	1.48371	0.00142633			Similar to 50S ribosomal protein L18, chloroplastic.	0
Os03g0703100	1.483	8.59757e-09	Os3bglu8, Os3BGlu8	BETA-GLUCOSIDASE 8	Similar to Beta-glucosidase.	Biological Process: carbohydrate metabolic process (GO:0005975), Molecular Function: catalytic activity (GO:0003824), Molecular Function: hydrolase activity, hydrolyzing O-glycosyl compounds (GO:0004553), Molecular Function: cation binding (GO:0043169)
Os09g0517000	1.48241	0.00618002			Conserved hypothetical protein.	0
Os02g0181300	1.48128	3.21854e-11	OsWRKY71, WRKY-71	TRANSCRIPTION FACTOR WRKY71	WRKY transcription factor, Defense response	Biological Process: regulation of transcription, DNA-templated (GO:0006355), Molecular Function: transcription factor activity, sequence-specific DNA binding (GO:0003700), Molecular Function: sequence-specific DNA binding (GO:0043565)
Os05g0447700	1.47908	0.000430613			Tetratricopeptide-like helical domain containing protein.	Molecular Function: binding (GO:0005488), Molecular Function: protein binding (GO:0005515)
Os12g0256000	1.47879	7.05577e-20			Alpha/beta hydrolase fold-3 domain containing protein.	Biological Process: metabolic process (GO:0008152), Molecular Function: hydrolase activity (GO:0016787)
Os01g0814800	1.47654	0.00872625			Similar to Cysteine synthase, chloroplast precursor (EC 2.5.1.47) (O-acetylserine sulfhydrylase) (O-acetylserine (Thiol)-lyase) (CSase B) (CS-B) (OAS-TL B).	Biological Process: cysteine biosynthetic process from serine (GO:0006535), Biological Process: metabolic process (GO:0008152), Molecular Function: catalytic activity (GO:0003824), Molecular Function: cysteine synthase activity (GO:0004124), Molecular Function: pyridoxal phosphate binding (GO:0030170)
Os03g0770800	1.47529	0.000103645	OsCslC9, OsCSLC9	CELLULOSE SYNTHASE LIKE C9	CSLC9.	0
Os03g0701200	1.47438	3.23652e-12			Similar to Sugar-starvation induced protein (Fragment).	Molecular Function: hydrolase activity (GO:0016787)
Os03g0120400	1.47375	9.62628e-26			Heavy metal transport/detoxification protein domain containing protein.	Biological Process: metal ion transport (GO:0030001), Molecular Function: metal ion binding (GO:0046872)
Os01g0883000	1.47284	0.00796648	OsRLCK50	RECEPTOR-LIKE CYTOPLASMIC KINASE 50	Similar to protein kinase.	Biological Process: protein phosphorylation (GO:0006468), Molecular Function: protein kinase activity (GO:0004672), Molecular Function: protein serine/threonine kinase activity (GO:0004674), Molecular Function: protein tyrosine kinase activity (GO:0004713), Molecular Function: ATP binding (GO:0005524), Molecular Function: transferase activity, transferring phosphorus-containing groups (GO:0016772)
Os04g0462500	1.46774	1.11151e-70	GF14b, OsGF14b, 14-3-3b	0	Similar to 14-3-3-like protein GF14-6.	Molecular Function: protein domain specific binding (GO:0019904)
Os07g0243200	1.46613	4.66278e-05	OsAGPL4, APL4, OsAPL4, OsSTA193	ADP-GLUCOSE PYROPHOSPHORYLASE LARGE SUBUNIT 4	Plastidic large subunit of ADP-glucose pyrophosphorylase (AGP), Starch synthesis in rice pollen	Biological Process: glycogen biosynthetic process (GO:0005978), Biological Process: biosynthetic process (GO:0009058), Molecular Function: glucose-1-phosphate adenylyltransferase activity (GO:0008878), Molecular Function: nucleotidyltransferase activity (GO:0016779)
Os08g0526633	1.45856	0.000273242			Non-protein coding transcript.	0
Os04g0429800	1.45558	9.49624e-09	OsNaPRT2	NICOTINATE PHOSPHORIBOSYLTRANSFERASE 2	Similar to Nicotinate phosphoribosyltransferase-like protein.	Biological Process: NAD biosynthetic process (GO:0009435), Biological Process: nicotinate nucleotide salvage (GO:0019358), Biological Process: pyridine nucleotide biosynthetic process (GO:0019363), Cellular Component: cytoplasm (GO:0005737), Molecular Function: nicotinate-nucleotide diphosphorylase (carboxylating) activity (GO:0004514), Molecular Function: nicotinate phosphoribosyltransferase act…
Os01g0949300	1.44955	6.69317e-26			EF-Hand type domain containing protein.	Molecular Function: calcium ion binding (GO:0005509)
Os10g0552700	1.44543	0.00119645	OsHyPRP19		Similar to Tumor-related protein (Fragment).	Biological Process: lipid transport (GO:0006869)
Os09g0337300	1.44534	7.31231e-28			Hypothetical gene.	0
Os05g0567600	1.44306	2.61855e-06			Similar to SANT/MYB protein.	Molecular Function: DNA binding (GO:0003677), Molecular Function: protein binding (GO:0005515)
Os03g0684700	1.4429	5.31433e-06			HPP family protein.	0
Os11g0466966	1.43807	3.46024e-10			Similar to OSIGBa0102N07.4 protein.	0
Os03g0773000	1.43497	0.000374349			Protein of unknown function DUF1005 family protein.	0
Os03g0305400	1.43343	0.00125598			UspA domain containing protein.	Biological Process: response to stress (GO:0006950)
Os02g0110200	1.43182	3.66063e-08	OsHPL3, CYP74B2	HYDROPEROXIDE LYASE 3	Fatty acid 13-hydroperoxide lyase (CYP74B), Plant defense	Biological Process: oxidation-reduction process (GO:0055114), Molecular Function: monooxygenase activity (GO:0004497), Molecular Function: iron ion binding (GO:0005506), Molecular Function: oxidoreductase activity, acting on paired donors, with incorporation or reduction of molecular oxygen (GO:0016705), Molecular Function: heme binding (GO:0020037)
Os03g0815100	1.42717	8.60265e-07	SNAC1, snac1, OsNAC9, ONAC002, ONAC2, ONAC033, ONAC33, ONAC043, ONAC43, ONAC044, ONAC44, OsNAC19, NAC19, SNAC1/ONAC002, OsSNAC1	_	Similar to OsNAC6 protein.	Biological Process: regulation of transcription, DNA-dependent (GO:0006355), Molecular Function: DNA binding (GO:0003677)
Os09g0509700	1.42669	3.28359e-08	OsBBX28, OsCCT32, OsQ	0	Zinc finger, B-box domain containing protein.	Cellular Component: intracellular (GO:0005622), Molecular Function: protein binding (GO:0005515), Molecular Function: zinc ion binding (GO:0008270)
Os01g0729900	1.42526	6.60877e-12			Conserved hypothetical protein.	0
Os07g0164200	1.42457	0.000277307			Similar to cDNA clone:001-026-G04, full insert sequence.	0
Os07g0189700	1.42405	0.000315851			Similar to JHL07K02.7 protein.	0
Os07g0469100	1.42047	9.96854e-09			Similar to Thylakoid membrane phosphoprotein 14 kDa, chloroplast precursor.	0
Os02g0190500	1.41216	0.000338999			Serine/threonine protein kinase-related domain containing protein.	Biological Process: protein phosphorylation (GO:0006468), Molecular Function: protein kinase activity (GO:0004672), Molecular Function: protein binding (GO:0005515), Molecular Function: ATP binding (GO:0005524), Molecular Function: transferase activity, transferring phosphorus-containing groups (GO:0016772)
Os06g0196300	1.41147	1.96097e-06			Similar to Peroxiredoxin Q (Fragment).	Biological Process: oxidation-reduction process (GO:0055114), Molecular Function: antioxidant activity (GO:0016209), Molecular Function: oxidoreductase activity (GO:0016491)
Os05g0594200	1.40981	4.04426e-09	OsCAX1b, CAX1b, CAX3, OsNCX10, NCX10	Ca(2+)/H(+) EXCHANGER 1B	Similar to Cation/proton exchanger 1a.	Biological Process: cation transport (GO:0006812), Biological Process: transmembrane transport (GO:0055085), Cellular Component: integral to membrane (GO:0016021), Molecular Function: cation transmembrane transporter activity (GO:0008324)
Os01g0185300	1.40978	9.40863e-17	OsAT9, OsAt9	ACYLTRANSFERASE 9	Transferase family protein.	Molecular Function: transferase activity, transferring acyl groups other than amino-acyl groups (GO:0016747)
Os08g0476100	1.40926	3.12085e-05			Domain of unknown function DUF547 domain containing protein.	0
Os01g0855600	1.40413	1.60789e-09	HS1	0	Similar to Hs1pro-1 protein.	0
Os03g0659200	1.40411	0.0017786	OsFdC1, FdC1	0	Similar to Ferredoxin.	Biological Process: electron transport chain (GO:0022900), Molecular Function: electron carrier activity (GO:0009055), Molecular Function: iron-sulfur cluster binding (GO:0051536), Molecular Function: 2 iron, 2 sulfur cluster binding (GO:0051537)
Os01g0881800	1.39923	0.00204476			Conserved hypothetical protein.	0
Os12g0641300	1.39644	0.0017786			Similar to Zn-dependent hydrolases of the beta-lactamase fold.	Molecular Function: hydrolase activity (GO:0016787)
Os04g0118800	1.39598	1.06526e-05			NB-ARC domain containing protein.	Biological Process: defense response (GO:0006952), Molecular Function: ADP binding (GO:0043531)
Os09g0472100	1.39401	0.000899414	OsABCG22	ABC TRANSPORTER G FAMILY MEMBER 22	Similar to ABC transporter.	Cellular Component: membrane (GO:0016020), Molecular Function: nucleotide binding (GO:0000166), Molecular Function: ATP binding (GO:0005524), Molecular Function: ATPase activity (GO:0016887), Molecular Function: nucleoside-triphosphatase activity (GO:0017111)
Os02g0806400	1.39179	4.30855e-07			Similar to Gata zn finger family protein.	0
Os01g0303800	1.39048	1.84893e-06			UspA domain containing protein.	Biological Process: response to stress (GO:0006950)
Os10g0101000	1.38617	7.1341e-05			Serine/threonine protein kinase domain containing protein.	Biological Process: protein phosphorylation (GO:0006468), Biological Process: recognition of pollen (GO:0048544), Molecular Function: protein kinase activity (GO:0004672), Molecular Function: protein serine/threonine kinase activity (GO:0004674), Molecular Function: protein tyrosine kinase activity (GO:0004713), Molecular Function: ATP binding (GO:0005524), Molecular Function: sugar binding (GO:0…
Os04g0645700	1.38352	1.44908e-09			Similar to H0811D08.5 protein.	0
Os04g0638300	1.38094	2.96484e-09			Hypothetical protein.	0
Os08g0172300	1.38093	7.23709e-07			Similar to H1005F08.16 protein.	0
Os07g0469200	1.38014	4.80137e-29			Similar to predicted protein.	0
Os02g0750100	1.37746	2.35562e-08			Similar to ATP synthase.	Biological Process: ATP synthesis coupled proton transport (GO:0015986), Cellular Component: plasma membrane (GO:0005886), Molecular Function: hydrogen ion transporting ATP synthase activity, rotational mechanism (GO:0046933)
Os04g0631100	1.37711	9.57562e-11			Similar to H0105C05.5 protein.	Biological Process: transport (GO:0006810), Biological Process: transmembrane transport (GO:0055085), Cellular Component: membrane (GO:0016020), Cellular Component: integral to membrane (GO:0016021), Molecular Function: transporter activity (GO:0005215), Molecular Function: transmembrane transporter activity (GO:0022857)
Os01g0727800	1.37669	0.000175007			Peptidase S8, subtilisin-related domain containing protein.	Biological Process: proteolysis (GO:0006508), Molecular Function: serine-type endopeptidase activity (GO:0004252)
Os01g0742300	1.37664	0.00112702			3-hydroxyacid dehydrogenase/reductase domain containing protein.	Biological Process: pentose-phosphate shunt (GO:0006098), Biological Process: oxidation-reduction process (GO:0055114), Molecular Function: nucleotide binding (GO:0000166), Molecular Function: phosphogluconate dehydrogenase (decarboxylating) activity (GO:0004616), Molecular Function: oxidoreductase activity (GO:0016491), Molecular Function: oxidoreductase activity, acting on the CH-OH group of do…
Os05g0568600	1.37427	0.00229808			Protein of unknown function DUF1645 family protein.	0
Os01g0631700	1.37409	5.43717e-05	0	0	Similar to Ser Thr specific protein kinase-like protein.	Biological Process: protein phosphorylation (GO:0006468), Molecular Function: protein kinase activity (GO:0004672), Molecular Function: protein serine/threonine kinase activity (GO:0004674), Molecular Function: protein tyrosine kinase activity (GO:0004713), Molecular Function: ATP binding (GO:0005524), Molecular Function: transferase activity, transferring phosphorus-containing groups (GO:0016772)
Os10g0396300	1.37369	4.3209e-11			Similar to MOB1.	0
Os03g0342850	1.37352	0.00577285			Hypothetical protein.	0
Os11g0620100	1.3718	8.72382e-14			Oligouridylate binding protein.	Molecular Function: nucleotide binding (GO:0000166), Molecular Function: nucleic acid binding (GO:0003676)
Os06g0644200	1.37066	6.69152e-10	OVP1	0	Similar to Pyrophosphate-energized vacuolar membrane proton pump (EC 3.6.1.1) (Pyrophosphate-energized inorganic pyrophosphatase) (H+-PPase) (Vacuolar H+-pyrophosphatase).	Biological Process: proton transport (GO:0015992), Cellular Component: membrane (GO:0016020), Molecular Function: inorganic diphosphatase activity (GO:0004427), Molecular Function: hydrogen-translocating pyrophosphatase activity (GO:0009678)
Os03g0765400	1.36695	4.44425e-19			Similar to nucleoporin p58/p45.	0
Os07g0534000	1.36664	0.00243838			Similar to permeases of the major facilitator superfamily.	0
Os02g0806350	1.3664	1.5753e-05			Hypothetical protein.	0
Os01g0132500	1.36551	6.25492e-11			Protein of unknown function DUF1639 domain containing protein.	0
Os07g0520800	1.36394	4.96575e-07			Ankyrin repeat-containing domain domain containing protein.	0
Os11g0582100	1.35705	5.94569e-16			Zinc finger, RING/FYVE/PHD-type domain containing protein.	Molecular Function: protein binding (GO:0005515), Molecular Function: zinc ion binding (GO:0008270)
Os05g0500101	1.3562	2.18477e-05			Hypothetical gene.	0
Os09g0478600	1.35146	0.000341973			Zinc finger, RING/FYVE/PHD-type domain containing protein.	Molecular Function: protein binding (GO:0005515), Molecular Function: zinc ion binding (GO:0008270)
Os04g0691400	1.35072	1.59893e-05			Similar to POT family protein.	Biological Process: oligopeptide transport (GO:0006857), Cellular Component: membrane (GO:0016020), Molecular Function: transporter activity (GO:0005215)
Os01g0662300	1.34969	5.61146e-07	rpl12-2, CL12, OsRPL12-2	RIBOSOMAL PROTEIN L12-2	Similar to Isoform 2 of 50S ribosomal protein L12, chloroplastic.	Biological Process: translation (GO:0006412), Cellular Component: intracellular (GO:0005622), Cellular Component: ribosome (GO:0005840), Molecular Function: structural constituent of ribosome (GO:0003735)
Os06g0179000	1.34943	0.00164329			Glycoside hydrolase family 79, N-terminal protein.	Biological Process: carbohydrate metabolic process (GO:0005975), Cellular Component: membrane (GO:0016020), Molecular Function: catalytic activity (GO:0003824), Molecular Function: hydrolase activity, acting on glycosyl bonds (GO:0016798), Molecular Function: cation binding (GO:0043169)
Os07g0544800	1.34914	0.000598014			Similar to Oxygen-evolving enhancer protein 3-2, chloroplast precursor (OEE3) (16 kDa subunit of oxygen evolving system of photosystem II) (OEC 16 kDa subunit) (Ferredoxin-NADP reductase binding protein) (BP).	Biological Process: photosynthesis (GO:0015979), Cellular Component: photosystem II (GO:0009523), Cellular Component: oxygen evolving complex (GO:0009654), Cellular Component: extrinsic to membrane (GO:0019898), Molecular Function: calcium ion binding (GO:0005509)
Os03g0170500	1.34904	2.46308e-07			Similar to Putativ eribonuclease P.	0
Os08g0101900	1.34756	5.86402e-05			UPF0497 membrane protein 2.	0
Os06g0184866	1.34715	5.82338e-07			Pentatricopeptide repeat domain containing protein.	0
Os07g0581400	1.34195	3.77067e-05			Hypothetical gene.	0
Os06g0264800	1.34039	1.51586e-07			Similar to Threonine endopeptidase.	0
Os02g0815200	1.33963	8.95907e-06			Similar to 29 kDa ribonucleoprotein, chloroplast precursor (RNA-binding protein cp29).	Molecular Function: nucleotide binding (GO:0000166), Molecular Function: nucleic acid binding (GO:0003676)
Os07g0212200	1.33755	1.2412e-05			Similar to MRNA-binding protein (Fragment).	Biological Process: cellular metabolic process (GO:0044237), Molecular Function: nucleotide binding (GO:0000166), Molecular Function: catalytic activity (GO:0003824), Molecular Function: coenzyme binding (GO:0050662)
Os04g0414700	1.33721	0.00127917			Photosystem I PsaO domain containing protein.	0
Os02g0716500	1.33536	2.44829e-05			Delta12-fatty acid desaturase	Biological Process: lipid metabolic process (GO:0006629), Biological Process: oxidation-reduction process (GO:0055114), Molecular Function: oxidoreductase activity, acting on paired donors, with oxidation of a pair of donors resulting in the reduction of molecular oxygen to two molecules of water (GO:0016717)
Os08g0518000	1.33482	0.00336291			Conserved hypothetical protein.	0
Os04g0626400	1.33295	3.77067e-05			Similar to OSIGBa0148A10.12 protein.	Molecular Function: binding (GO:0005488)
Os11g0604900	1.33282	4.62216e-05			Similar to NB-ARC domain containing protein.	Biological Process: defense response (GO:0006952), Molecular Function: ADP binding (GO:0043531)
Os03g0790600	1.33233	0.000412805	go, go1, pla3, PLA3, PLA3/GO, OsLBD3-7, LBD3-7	0	Glutamate carboxypeptidase, Hormone homeostasis, Regulation of developmental processes	0
Os02g0754300	1.33164	9.15932e-07			Ribosomal protein L29 family protein.	Biological Process: translation (GO:0006412), Cellular Component: intracellular (GO:0005622), Cellular Component: ribosome (GO:0005840), Molecular Function: structural constituent of ribosome (GO:0003735)
Os07g0273000	1.33143	8.07034e-06			Conserved hypothetical protein.	0
Os07g0569100	1.3292	9.19419e-10	OsREM4.1	REMORIN 4.1	Remorin protein, Coordination of interlink between abscisic acid (ABA) and brassinosteroid (BR) signaling	0
Os09g0128400	1.3262	8.97878e-15			Conserved hypothetical protein.	0
Os02g0755500	1.32533	0.000156183			Similar to UDP-glycosyltransferase 85A8.	Biological Process: metabolic process (GO:0008152), Molecular Function: transferase activity, transferring hexosyl groups (GO:0016758)
Os03g0796900	1.3244	2.83839e-18	OsZIP33, RISBZ2, OsbZIP33	0	bZIP transcription factor, Globulin gene promoter in endosperm	Biological Process: regulation of transcription, DNA-templated (GO:0006355), Molecular Function: sequence-specific DNA binding transcription factor activity (GO:0003700), Molecular Function: sequence-specific DNA binding (GO:0043565)
Os05g0337400	1.32266	1.19738e-05			Similar to heavy-metal-associated domain-containing protein.	0
Os03g0795300	1.32194	0.000537734			Similar to Extensin protein-like.	Molecular Function: protein binding (GO:0005515)
Os02g0744650	1.32025	0.000157992			Similar to CSLA1-cellulose synthase-like family A; mannan synthase.	0
Os09g0412300	1.31878	4.01927e-07			Similar to Calmodulin-like protein.	0
Os02g0834800	1.31292	0.0047255			Hypothetical protein.	0
Os10g0536500	1.31152	4.71818e-06			Peptidase S10, serine carboxypeptidase, active site domain containing protein.	0
Os04g0493100	1.30996	8.91622e-10	OsbHLH065, OsbHLH65	0	Basic helix-loop-helix dimerisation region bHLH domain containing protein.	0
Os06g0199300	1.30847	1.47731e-25			Non-protein coding transcript.	0
Os02g0731600	1.30781	1.17931e-06			Similar to Threonine endopeptidase.	0
Os11g0605100	1.30749	1.88805e-13			NB-ARC domain containing protein.	Biological Process: defense response (GO:0006952), Molecular Function: ADP binding (GO:0043531)
Os07g0680900	1.30581	2.35594e-05			Similar to Ribosomal protein S6 kinase.	Biological Process: protein phosphorylation (GO:0006468), Molecular Function: protein kinase activity (GO:0004672), Molecular Function: protein serine/threonine kinase activity (GO:0004674), Molecular Function: ATP binding (GO:0005524), Molecular Function: transferase activity, transferring phosphorus-containing groups (GO:0016772)
Os03g0347900	1.30511	4.30406e-11			Terpenoid synthase domain containing protein.	Biological Process: metabolic process (GO:0008152), Molecular Function: magnesium ion binding (GO:0000287), Molecular Function: lyase activity (GO:0016829)
Os06g0506000	1.30424	1.60681e-07			Conserved hypothetical protein.	0
Os08g0547300	1.30375	4.75134e-07			Similar to Cytochrome P450 78A1 (EC 1.14.-.-) (CYPLXXVIII).	Biological Process: oxidation-reduction process (GO:0055114), Molecular Function: iron ion binding (GO:0005506), Molecular Function: electron carrier activity (GO:0009055), Molecular Function: oxidoreductase activity, acting on paired donors, with incorporation or reduction of molecular oxygen (GO:0016705), Molecular Function: heme binding (GO:0020037)
Os02g0332700	1.30067	2.01806e-07			Conserved hypothetical protein.	0
Os01g0256500	1.30052	7.12953e-07			Similar to ZnI.	0
Os02g0517421	1.29761	0.000450119			Non-protein coding transcript.	0
Os08g0396200	1.29383	7.53468e-25			Hypothetical gene.	0
Os11g0120300	1.28625	0.00199743			Protein of unknown function DUF567 family protein.	Biological Process: cellular metabolic process (GO:0044237)
Os02g0827600	1.28491	3.40155e-05			Protein of unknown function DUF3531 domain containing protein.	0
Os09g0484900	1.28416	0.000288189			Sodium/sulphate symporter family protein.	Biological Process: sodium ion transport (GO:0006814), Biological Process: transmembrane transport (GO:0055085), Cellular Component: membrane (GO:0016020), Molecular Function: transporter activity (GO:0005215)
Os09g0278700	1.28371	0.00031194			Hypothetical conserved gene.	0
Os01g0935400	1.28262	0.00568946			2OG-Fe(II) oxygenase domain containing protein.	Biological Process: oxidation-reduction process (GO:0055114), Molecular Function: oxidoreductase activity (GO:0016491), Molecular Function: oxidoreductase activity, acting on paired donors, with incorporation or reduction of molecular oxygen, 2-oxoglutarate as one donor, and incorporation of one atom each of oxygen into both donors (GO:0016706)
Os10g0456800	1.28214	1.66204e-07			CHY zinc finger protein, Transcriptional co-activator of DST (Drought and Salt Tolerance: zinc finger transcription factor gene), Drought and salt tolerance, Stomatal aperture control	Molecular Function: protein binding (GO:0005515), Molecular Function: zinc ion binding (GO:0008270)
Os03g0241300	1.28172	8.49176e-05	OsPE	0	Conserved hypothetical protein.	0
Os10g0499400	1.27786	2.45423e-11			Cystathionine beta-synthase, core domain containing protein.	Molecular Function: protein binding (GO:0005515)
Os10g0575000	1.27729	1.22459e-14	OsbHLH009, OsMYC2, MYC2	0	JAZ-interacting transcription factor, Positive regulator of jasmonate (JA) signaling pathway, Bacterial blight resistance, Spikelet development	Molecular Function: protein dimerization activity (GO:0046983)
Os06g0604600	1.27636	3.54337e-08			Conserved hypothetical protein.	0
Os01g0197400	1.27336	1.19582e-10			Conserved hypothetical protein.	0
Os09g0481200	1.27308	1.17059e-08	PsaG	0	Similar to photosystem I reaction center subunit V.	Biological Process: photosynthesis (GO:0015979), Cellular Component: photosystem I (GO:0009522), Cellular Component: membrane (GO:0016020), Molecular Function: chlorophyll binding (GO:0016168)
Os10g0166300	1.27094	0.00240565			Hypothetical gene.	0
Os04g0481300	1.27026	0.000128126			Methyltransferase type 11 domain containing protein.	Biological Process: metabolic process (GO:0008152), Molecular Function: methyltransferase activity (GO:0008168)
Os05g0205000	1.26925	4.79655e-08	OsNIP1;3, NIP1-3, OsNIP1.3, NIP1.3	NOD26 LIKE INTRINSIC PROTEIN 1;3	Similar to NOD26-like membrane integral protein ZmNIP1-1.	Biological Process: transport (GO:0006810), Cellular Component: membrane (GO:0016020), Molecular Function: transporter activity (GO:0005215)
Os05g0506000	1.2691	2.61652e-06	0	0	Similar to MS5-like protein (Fragment).	Molecular Function: binding (GO:0005488), Molecular Function: protein binding (GO:0005515)
Os06g0298200	1.2686	3.77762e-17	OsBBX19, OsM, DTH2, qDTH-2, OsCCT22	0	Similar to CCT motif family protein.	Cellular Component: intracellular (GO:0005622), Molecular Function: protein binding (GO:0005515), Molecular Function: zinc ion binding (GO:0008270)
Os05g0591550	1.26846	0.00294835			Conserved hypothetical protein.	0
Os01g0681900	1.26808	2.82384e-08	OsGLT1, OsNADH-GOGAT1, NADH-GOGAT1, OsNADH-GOGAT, GOGAT, NADH-GOGAT	NADH-DEPENDENT GLUTAMATE SYNTHASE 1	Non-protein coding transcript.	0
Os07g0573900	1.26606	0.00107021	OsAGP27	ARABINOGALACTAN PROTEIN 27	Hypothetical conserved gene.	0
Os12g0492600	1.2648	2.06136e-05			Hypothetical gene.	0
Os04g0380200	1.26453	0.00015773			Conserved hypothetical protein.	0
Os03g0164300	1.2644	3.90653e-06			Conserved hypothetical protein.	0
Os01g0221100	1.26238	6.10183e-08			GH3 auxin-responsive promoter family protein.	0
Os08g0545000	1.2609	2.36386e-20			Pyridoxal phosphate-dependent transferase, major region, subdomain 1 domain containing protein.	Molecular Function: catalytic activity (GO:0003824), Molecular Function: pyridoxal phosphate binding (GO:0030170)
Os06g0729800	1.26064	0.00365708			Hypothetical gene.	0
Os01g0268600	1.26024	2.41058e-06			Glycoside hydrolase, family 31 protein.	Biological Process: carbohydrate metabolic process (GO:0005975), Molecular Function: catalytic activity (GO:0003824), Molecular Function: hydrolase activity, hydrolyzing O-glycosyl compounds (GO:0004553), Molecular Function: carbohydrate binding (GO:0030246)
Os03g0225100	1.25945	2.07532e-07	OsMKK10-2, MKK10-2D, OsMPKK10-2, MPKK10-2, OsMPKK10-2D, MPKK10-2D, MPKK10.2	0	Mitogen-activated protein kinase (MAPK) kinase, Disease resistance, Drought tolerance	Biological Process: protein phosphorylation (GO:0006468), Molecular Function: protein kinase activity (GO:0004672), Molecular Function: ATP binding (GO:0005524)
Os01g0929200	1.25928	1.28851e-08	OsRLCK53	RECEPTOR-LIKE CYTOPLASMIC KINASE 53	Serine/threonine protein kinase domain containing protein.	Biological Process: protein phosphorylation (GO:0006468), Molecular Function: protein kinase activity (GO:0004672), Molecular Function: protein serine/threonine kinase activity (GO:0004674), Molecular Function: protein tyrosine kinase activity (GO:0004713), Molecular Function: ATP binding (GO:0005524), Molecular Function: transferase activity, transferring phosphorus-containing groups (GO:0016772)
Os10g0462600	1.25879	1.95525e-16			Conserved hypothetical protein.	0
Os02g0750200	1.25871	2.51991e-09			Non-protein coding transcript.	0
Os07g0410700	1.25581	0.00240707	DERF2, OsDERF2, OsERF#086, OsERF086, OsERF86, AP2/EREBP#074, AP2/EREBP74, OsERF1	ETHYLENE RESPONSE FACTOR 86	Similar to Ethylene-responsive element binding protein 1.	Biological Process: regulation of transcription, DNA-dependent (GO:0006355), Molecular Function: DNA binding (GO:0003677), Molecular Function: sequence-specific DNA binding transcription factor activity (GO:0003700)
Os09g0341001	1.25322	0.000233675			Non-protein coding transcript.	0
Os06g0301500	1.25268	3.53036e-07			Hypothetical protein.	0
Os06g0708400	1.25245	0.00426115	OsCYP19-4, OsCYP-16, OsCYP19-3, OsCYP19-4.1, OsCYP19-4.2, OsCYP19-4.3, OsCYP19-4.4, OsCYP19-4.5, OsCYP19-4.6, OsCYP19-4.7, OsCYP19-4.8	CYCLOPHILIN 19-4	Cyclophilin, Cold tolerance	Biological Process: protein peptidyl-prolyl isomerization (GO:0000413), Biological Process: protein folding (GO:0006457), Molecular Function: peptidyl-prolyl cis-trans isomerase activity (GO:0003755)
Os03g0668500	1.25208	3.40869e-05			Conserved hypothetical protein.	0
Os09g0508000	1.24908	0.000411772			Hypothetical protein.	0
Os02g0498100	1.24737	2.71582e-22			Hypothetical protein.	0
Os07g0191500	1.24675	8.7763e-05			Pentatricopeptide repeat domain containing protein.	Molecular Function: binding (GO:0005488)
Os01g0575200	1.24646	0.000109413	OsbHLH024	0	Helix-loop-helix DNA-binding domain containing protein.	0
Os02g0465900	1.24423	1.91334e-06	OsARP, OsCTP	_	ChaC-like protein family protein.	0
Os01g0833000	1.24356	2.03815e-05			Pentatricopeptide repeat domain containing protein.	Molecular Function: binding (GO:0005488)
Os01g0222600	1.24285	1.2815e-11			Conserved hypothetical protein.	0
Os03g0122300	1.24216	0.00065406	FLS	0	Similar to Flavanone 3-hydroxylase-like protein.	Biological Process: oxidation-reduction process (GO:0055114), Molecular Function: oxidoreductase activity (GO:0016491), Molecular Function: oxidoreductase activity, acting on paired donors, with incorporation or reduction of molecular oxygen, 2-oxoglutarate as one donor, and incorporation of one atom each of oxygen into both donors (GO:0016706)
Os02g0605900	1.24056	0.00172511	Cht6	CHITINASE 6	Similar to Chitinase (EC 3.2.1.14) A.	Biological Process: carbohydrate metabolic process (GO:0005975), Biological Process: chitin catabolic process (GO:0006032), Biological Process: cell wall macromolecule catabolic process (GO:0016998), Molecular Function: chitinase activity (GO:0004568), Molecular Function: chitin binding (GO:0008061)
Os07g0559700	1.23977	6.9317e-06	OsMST6	0	Similar to Monosaccharide transporter 3.	Biological Process: transport (GO:0006810), Biological Process: transmembrane transport (GO:0055085), Cellular Component: membrane (GO:0016020), Cellular Component: integral to membrane (GO:0016021), Molecular Function: transporter activity (GO:0005215), Molecular Function: transmembrane transporter activity (GO:0022857), Molecular Function: substrate-specific transmembrane transporter activity (…
Os03g0747700	1.23971	0.000249223			Similar to photosystem II 11 kDa protein-related.	0
Os08g0119800	1.23939	5.01913e-07	PsbY	0	Similar to Photosystem II core complex proteins psbY, chloroplast precursor (L- arginine metabolising enzyme) (L-AME) [Contains: Photosystem II protein psbY-1 (psbY-A1); Photosystem II protein psbY-2 (psbY-A2)].	Biological Process: photosynthesis (GO:0015979), Cellular Component: photosystem II (GO:0009523), Cellular Component: integral to membrane (GO:0016021), Molecular Function: manganese ion binding (GO:0030145)
Os05g0239350	1.23871	0.00135061			Hypothetical gene.	0
Os06g0306600	1.23745	7.7688e-06			Alpha/beta hydrolase fold-3 domain containing protein.	Biological Process: metabolic process (GO:0008152), Molecular Function: hydrolase activity (GO:0016787)
Os07g0475000	1.23652	3.93697e-09			Conserved hypothetical protein.	0
Os11g0438700	1.23628	6.66331e-10			Similar to Tropinone reductase-I (EC 1.1.1.206) (TR-I) (Tropine dehydrogenase).	Biological Process: metabolic process (GO:0008152), Molecular Function: nucleotide binding (GO:0000166), Molecular Function: oxidoreductase activity (GO:0016491)
Os09g0361500	1.23283	7.72077e-05	ICS1, OsICS1, OsICS	0	Isochorismate synthase domain containing protein.	Biological Process: biosynthetic process (GO:0009058), Molecular Function: isochorismate synthase activity (GO:0008909)
Os02g0591000	1.23123	3.21525e-09			Conserved hypothetical protein.	0
Os01g0905200	1.22938	0.00014713			Exo70 exocyst complex subunit family protein.	Biological Process: exocytosis (GO:0006887), Cellular Component: exocyst (GO:0000145)
Os03g0805600	1.22873	1.04569e-12			Similar to pheophorbide a oxygenase.	Biological Process: oxidation-reduction process (GO:0055114), Molecular Function: oxidoreductase activity (GO:0016491), Molecular Function: 2 iron, 2 sulfur cluster binding (GO:0051537)
Os01g0202500	1.22861	2.77277e-12	OsBBX1, OsDBB3c	0	Similar to B-box zinc finger family protein.	Cellular Component: intracellular (GO:0005622), Molecular Function: zinc ion binding (GO:0008270)
Os09g0319701	1.2286	1.10021e-13			Conserved hypothetical protein.	0
Os01g0209800	1.22786	0.000375261	OsCAT1	0	Similar to Cationic amino acid transporter (Fragment).	Biological Process: amino acid transmembrane transport (GO:0003333), Biological Process: transport (GO:0006810), Biological Process: transmembrane transport (GO:0055085), Cellular Component: membrane (GO:0016020), Molecular Function: amino acid transmembrane transporter activity (GO:0015171)
Os02g0754600	1.22724	1.27852e-10			Conserved hypothetical protein.	0
Os05g0439200	1.22717	6.98288e-11			Hypothetical protein.	0
Os03g0107700	1.22705	3.87353e-05	Orysa; EL2	D-TYPE CYCLIN-INTERACTING PROTEIN	Similar to EL2 protein.	0
Os12g0136500	1.2267	1.38163e-11			Non-protein coding transcript.	0
Os04g0463400	1.22633	0.000119237	OsVIT1;2, OsVIT1	0	Vacuolar membrane transporter, Fe and Zn translocation between flag leaves and seeds	0
Os04g0546800	1.225	3.37128e-13	OsERF1, OsERF#093, OsERF093, OsERF93, AP2/EREBP#168, AP2/EREBP168	ETHYLENE RESPONSE FACTOR 93	Pathogenesis-related transcriptional factor and ERF domain containing protein.	Biological Process: regulation of transcription, DNA-dependent (GO:0006355), Molecular Function: DNA binding (GO:0003677), Molecular Function: sequence-specific DNA binding transcription factor activity (GO:0003700)
Os10g0493600	1.22483	1.3284e-11	alphaGa1, alpha-Gal I	0	Alpha-galactosidase precursor (EC 3.2.1.22) (Melibiase) (Alpha-D- galactoside galactohydrolase).	Biological Process: carbohydrate metabolic process (GO:0005975), Biological Process: metabolic process (GO:0008152), Molecular Function: catalytic activity (GO:0003824), Molecular Function: hydrolase activity, hydrolyzing O-glycosyl compounds (GO:0004553), Molecular Function: cation binding (GO:0043169)
Os08g0457901	1.22433	0.00312796			Hypothetical genes.	0
Os11g0202300	1.22428	7.18346e-08			Cyclin-like F-box domain containing protein.	Molecular Function: protein binding (GO:0005515)
Os06g0306300	1.2241	9.90858e-05	prx78	0	Haem peroxidase domain containing protein.	Biological Process: response to oxidative stress (GO:0006979), Biological Process: oxidation-reduction process (GO:0055114), Molecular Function: peroxidase activity (GO:0004601), Molecular Function: heme binding (GO:0020037)
Os10g0521900	1.22251	0.000779333	OsRhmbd17, RHMBD17	0	Similar to Membrane protein.	Biological Process: proteolysis (GO:0006508), Cellular Component: integral to membrane (GO:0016021), Molecular Function: serine-type endopeptidase activity (GO:0004252)
Os08g0382400	1.21762	0.00272088	OsCYP38, OsCYP38a, OsCYP38b	CYCLOPHILIN 38	Peptidyl-prolyl cis-trans isomerase, cyclophilin-type domain containing protein.	Biological Process: protein folding (GO:0006457), Molecular Function: peptidyl-prolyl cis-trans isomerase activity (GO:0003755)
Os01g0869800	1.21716	9.54017e-06	OsPsbS1, PsbS1	0	22-kDa Photosystem II protein, Photoprotection	0
Os12g0225100	1.21713	2.57734e-12			Nucleotide-binding, alpha-beta plait domain containing protein.	Molecular Function: nucleotide binding (GO:0000166)
Os03g0686900	1.21684	4.79351e-08	SIP4	0	CBM48 domain-containing protein, Compound granule formation and starch synthesis	0
Os02g0187700	1.21659	0.0024554			Similar to Myb-related protein B (B-Myb) (Myb-related protein 1) (XMYB1).	Biological Process: regulation of transcription, DNA-dependent (GO:0006355), Molecular Function: DNA binding (GO:0003677), Molecular Function: protein binding (GO:0005515)
Os02g0332800	1.21581	3.69638e-05			Hypothetical gene.	0
Os04g0388700	1.21369	6.03267e-14			Similar to OSIGBa0096P03.3 protein.	0
Os05g0454500	1.21368	4.35242e-07			Conserved hypothetical protein.	0
Os03g0103400	1.21107	0.00410294			GRAS transcription factor domain containing protein.	0
Os05g0321600	1.20923	0.000242855			Conserved hypothetical protein.	0
Os06g0188400	1.20883	0.000940602	OsGLR4.1	0	Extracellular ligand-binding receptor domain containing protein.	0
Os07g0577600	1.20542	3.57692e-06	0	0	Similar to Type II chlorophyll a/b binding protein from photosystem I precursor.	Biological Process: photosynthesis, light harvesting (GO:0009765), Cellular Component: membrane (GO:0016020)
Os03g0711100	1.20453	2.22712e-07	OsBBX10, OsJ, OsCCT14, OsCOL10, COL10, OsCOL9	0	Member of the CONSTANS-like (COL) family, Flowering time repressor	Molecular Function: protein binding (GO:0005515), Molecular Function: zinc ion binding (GO:0008270), Cellular Component: intracellular (GO:0005622)
Os01g0203400	1.20402	2.26144e-05	OsCEP7, CEP7, OsCEP8, CEP8	0	Hypothetical protein.	0
Os11g0671000	1.20327	1.76613e-25			Similar to Dormancy-associated protein.	0
Os05g0555600	1.20142	0.00533664	OsGLT2, OsNADH-GOGAT2, NADH-GOGAT2, OsGOGAT2	NADH-DEPENDENT GLUTAMATE SYNTHASE 2	Similar to Glutamate synthase [NADH], amyloplastic.	Biological Process: glutamate biosynthetic process (GO:0006537), Biological Process: metabolic process (GO:0008152), Biological Process: oxidation-reduction process (GO:0055114), Molecular Function: oxidoreductase activity (GO:0016491), Molecular Function: oxidoreductase activity, acting on the CH-NH2 group of donors, NAD or NADP as acceptor (GO:0016639), Molecular Function: iron-sulfur cluster b…
Os01g0243400	1.19923	0.00633714			Hypothetical conserved gene.	0
Os04g0617700	1.19808	4.40652e-05			Similar to H0313F03.6 protein.	0
Os01g0871500	1.1979	0.000245381			TGF-beta receptor, type I/II extracellular region family protein.	Biological Process: oligopeptide transport (GO:0006857), Cellular Component: membrane (GO:0016020), Molecular Function: transporter activity (GO:0005215)
Os03g0741100	1.19622	3.67256e-07	OsbHLH148	_	Basic helix-loop-helix transcription factor, Drought tolerance	Molecular Function: protein dimerization activity (GO:0046983)
Os01g0310600	1.19591	0.00039039			Non-protein coding transcript.	0
Os09g0279500	1.19497	0.000419261			Similar to Plastid-specific 30S ribosomal protein 2, chloroplast precursor (PSRP- 2).	Molecular Function: nucleotide binding (GO:0000166), Molecular Function: nucleic acid binding (GO:0003676)
Os07g0162500	1.19133	6.88652e-08			Alpha/beta hydrolase fold-3 domain containing protein.	0
Os04g0608100	1.19073	1.3409e-05	GalK2	0	Ribosomal protein S5 domain 2-type fold domain containing protein.	Biological Process: galactose metabolic process (GO:0006012), Biological Process: metabolic process (GO:0008152), Biological Process: carbohydrate phosphorylation (GO:0046835), Cellular Component: cytoplasm (GO:0005737), Molecular Function: galactokinase activity (GO:0004335), Molecular Function: ATP binding (GO:0005524), Molecular Function: kinase activity (GO:0016301), Molecular Function: phosp…
Os03g0183000	1.18944	0.00625802	OsERF#062, OsERF062, OsERF62, AP2/EREBP#125, AP2/EREBP125, AP2-125, OsLG3, LG3, OsLG3/OsAP2-125, OsAP2-125	ETHYLENE RESPONSE FACTOR 62	APETALA2/ethylene-responsive element binding protein 125, Transcription regulator, Positive regulator of grain length	Biological Process: regulation of transcription, DNA-templated (GO:0006355), Molecular Function: DNA binding (GO:0003677), Molecular Function: transcription factor activity, sequence-specific DNA binding (GO:0003700)
Os03g0183200	1.18775	1.93775e-09	OsERF#069, OsERF069, OsERF69, AP2/EREBP#028, AP2/EREBP28	ETHYLENE RESPONSE FACTOR 69	Similar to AP2 domain containing protein, expressed.	0
Os06g0699050	1.18724	0.000673302			Hypothetical protein.	0
Os04g0584600	1.18679	1.88209e-09	OsCDPK13, OsCPK13, OsCDPK7, OsCPK13-1, OsCPK13-2	CALCIUM-DEPENDENT PROTEIN KINASE 13	Similar to Calcium dependent protein kinase.	Biological Process: protein phosphorylation (GO:0006468), Molecular Function: protein kinase activity (GO:0004672), Molecular Function: protein serine/threonine kinase activity (GO:0004674), Molecular Function: calcium ion binding (GO:0005509), Molecular Function: ATP binding (GO:0005524), Molecular Function: transferase activity, transferring phosphorus-containing groups (GO:0016772)
Os01g0602400	1.18563	4.94409e-05	OsCYP72A32	0	Similar to Cytochrome P450 monooxygenase CYP72A5 (Fragment).	Biological Process: oxidation-reduction process (GO:0055114), Molecular Function: iron ion binding (GO:0005506), Molecular Function: electron carrier activity (GO:0009055), Molecular Function: oxidoreductase activity, acting on paired donors, with incorporation or reduction of molecular oxygen (GO:0016705), Molecular Function: heme binding (GO:0020037)
Os12g0552400	1.18532	4.27535e-06			Rossmann-like alpha/beta/alpha sandwich fold domain containing protein.	Biological Process: response to stress (GO:0006950)
Os03g0685000	1.18143	6.90633e-07			Similar to Ferredoxin.	Biological Process: electron transport chain (GO:0022900), Molecular Function: electron carrier activity (GO:0009055), Molecular Function: iron-sulfur cluster binding (GO:0051536), Molecular Function: 2 iron, 2 sulfur cluster binding (GO:0051537)
Os02g0152400	1.18045	7.33286e-06	RbcS1, OsRBCS1, OsRbcS1	0	Rubisco small subunit 1, Reguration of Rubisco catalytic activity	0
Os08g0105800	1.18042	8.29596e-07			Cytochrome P450 family protein.	Biological Process: oxidation-reduction process (GO:0055114), Molecular Function: iron ion binding (GO:0005506), Molecular Function: electron carrier activity (GO:0009055), Molecular Function: oxidoreductase activity, acting on paired donors, with incorporation or reduction of molecular oxygen (GO:0016705), Molecular Function: heme binding (GO:0020037)
Os11g0444000	1.17969	2.33761e-07			Similar to UDP-glucosyltransferase BX8.	Biological Process: metabolic process (GO:0008152), Molecular Function: transferase activity, transferring hexosyl groups (GO:0016758)
Os01g0349600	1.17963	5.77252e-14			Hypothetical protein.	0
Os10g0181100	1.17886	0.000259901			Conserved hypothetical protein.	0
Os01g0252600	1.17846	1.18405e-06			Similar to predicted protein.	0
Os11g0692400	1.17806	2.92743e-06			Conserved hypothetical protein.	0
Os05g0161500	1.17341	1.89312e-05			RelA/SpoT domain containing protein.	Biological Process: guanosine tetraphosphate metabolic process (GO:0015969), Molecular Function: calcium ion binding (GO:0005509)
Os04g0555000	1.17036	1.56375e-10	OsHAM3, HAM3	0	GRAS (GAI-RGA-SCR) plant-specific transcription factor, Maintenance of shoot apical meristem indeterminacy, Regulation of vegetative to reproductive phase change	0
Os02g0550400	1.17009	0.00341186			Tetratricopeptide-like helical domain containing protein.	Molecular Function: binding (GO:0005488), Molecular Function: protein binding (GO:0005515)
Os01g0854000	1.16872	0.000124392			Similar to AER.	Molecular Function: transferase activity, transferring acyl groups other than amino-acyl groups (GO:0016747)
Os05g0467400	1.16833	0.0027107			Domain of unknown function DUF1618 domain containing protein.	0
Os05g0186000	1.16717	3.66043e-06			Similar to 30S ribosomal protein S31, chloroplast (Fragment).	0
Os01g0873000	1.16716	0.00366993			Hypothetical conserved gene.	0
Os12g0204500	1.16599	0.000294944			Protein of unknown function DUF579, plant family protein.	0
Os07g0143600	1.16586	5.48158e-13			Hypothetical conserved gene.	0
Os02g0808500	1.16536	3.62879e-05			Hypothetical protein.	0
Os02g0673500	1.16517	6.34755e-09			Basic helix-loop-helix dimerisation region bHLH domain containing protein.	0
Os01g0681700	1.16423	1.78175e-08			Hypothetical conserved gene.	0
Os03g0701300	1.16296	9.32735e-09			Similar to predicted protein.	0
Os08g0266400	1.16252	7.65956e-07			Leucine-rich repeat, N-terminal domain containing protein.	Molecular Function: protein binding (GO:0005515)
Os02g0199600	1.16117	4.4508e-05			Similar to F-box domain containing protein.	0
Os04g0461600	1.15998	3.38468e-06			Similar to Fw2.2.	0
Os01g0735500	1.15924	0.00301456			Conserved hypothetical protein.	0
Os06g0107700	1.15839	7.61668e-09			Leaf-type ferredoxin-NADP+-oxidoreductase, Regulation of electron partitioning in the chloroplast	Biological Process: oxidation-reduction process (GO:0055114), Molecular Function: oxidoreductase activity (GO:0016491)
Os08g0364500	1.15817	0.00355884			Conserved hypothetical protein.	0
Os08g0425700	1.15758	0.00148983	OsANN7	ANNEXIN 7	Similar to Annexin-like protein.	Molecular Function: calcium ion binding (GO:0005509), Molecular Function: calcium-dependent phospholipid binding (GO:0005544)
Os12g0468300	1.15751	7.67602e-06	0	0	Similar to NB-ARC domain containing protein, expressed.	0
Os11g0248200	1.15726	2.9187e-05			Nucleotide-binding, alpha-beta plait domain containing protein.	Molecular Function: nucleotide binding (GO:0000166), Molecular Function: nucleic acid binding (GO:0003676)
Os11g0158600	1.15657	0.000489142			Homeodomain-like domain containing protein.	Biological Process: regulation of transcription, DNA-dependent (GO:0006355), Cellular Component: nucleus (GO:0005634), Molecular Function: DNA binding (GO:0003677), Molecular Function: sequence-specific DNA binding transcription factor activity (GO:0003700), Molecular Function: protein binding (GO:0005515), Molecular Function: sequence-specific DNA binding (GO:0043565)
Os07g0596950	1.15602	0.000391356			Conserved hypothetical protein.	0
Os01g0619800	1.15515	0.000332371			Similar to Hydrolase, hydrolyzing O-glycosyl compounds.	0
Os05g0560000	1.15248	5.59779e-05	PsaH, GOS5	0	Photosystem I reaction center subunit VI, chloroplast precursor (PSI- H) (Light-harvesting complex I 11 kDa protein) (GOS5 protein).	Biological Process: photosynthesis (GO:0015979), Cellular Component: photosystem I (GO:0009522), Cellular Component: photosystem I reaction center (GO:0009538)
Os02g0208100	1.15111	3.23883e-12	OsNTT2	PLASTIDIC NUCLEOTIDE TRANSPORT PROTEIN 2	Similar to plastidic ATP/ADP-transporter.	Biological Process: transport (GO:0006810), Cellular Component: integral to membrane (GO:0016021), Molecular Function: ATP:ADP antiporter activity (GO:0005471), Molecular Function: ATP binding (GO:0005524)
Os07g0626800	1.1493	0.00687087			Amine oxidase domain containing protein.	Biological Process: oxidation-reduction process (GO:0055114), Molecular Function: oxidoreductase activity (GO:0016491)
Os02g0124800	1.1487	7.65084e-09			Conserved hypothetical protein.	0
Os01g0619900	1.14745	3.90653e-06			Similar to DNA binding.	0
Os06g0654900	1.14735	3.0229e-10	OsBBX20, OsE, OsCCT23	0	Similar to CONSTANS-like protein CO6.	Molecular Function: protein binding (GO:0005515)
Os05g0404200	1.14419	3.41196e-12	OsMSRB3, MSRB3	0	Methionine sulphoxide reductase B domain containing protein.	Biological Process: oxidation-reduction process (GO:0055114), Molecular Function: peptide-methionine-(S)-S-oxide reductase activity (GO:0008113)
Os01g0760000	1.14388	0.00250052	0	0	Similar to Dynein light chain.	Biological Process: microtubule-based process (GO:0007017), Cellular Component: microtubule associated complex (GO:0005875)
Os09g0259200	1.14321	0.000683371	OsSWEET7d, SWEET7d	SUGAR TRANSPORTER SWEET7D	Similar to seven-transmembrane-domain protein 1.	Cellular Component: integral to membrane (GO:0016021)
Os02g0190600	1.14299	1.69131e-09	OsLCYb, OsLCYbeta, OsLYCb, OsLCY	0	Lycopene beta and epsilon cyclase domain containing protein.	Biological Process: carotenoid biosynthetic process (GO:0016117), Molecular Function: oxidoreductase activity, acting on paired donors, with incorporation or reduction of molecular oxygen (GO:0016705)
Os01g0769700	1.14248	7.20253e-08	YK1, OsCrRLK1L5	0	Receptor-like kinase, Control of reproductive growth and development, Repression of cell death	Biological Process: protein phosphorylation (GO:0006468), Molecular Function: protein kinase activity (GO:0004672), Molecular Function: ATP binding (GO:0005524)
Os01g0102850	1.14226	4.20866e-09			Similar to nitrilase 2.	0
Os06g0132400	1.14195	0.00311477	ChlM, MgMT	0	Similar to Magnesium-protoporphyrin O-methyltransferase (EC 2.1.1.11) (Magnesium- protoporphyrin IX methyltransferase).	Biological Process: photosynthesis (GO:0015979), Biological Process: chlorophyll biosynthetic process (GO:0015995), Molecular Function: magnesium protoporphyrin IX methyltransferase activity (GO:0046406)
Os03g0791432	1.14131	0.000316042			Expressed protein.	0
Os08g0130100	1.14049	5.9314e-08			Zinc finger, LSD1-type domain containing protein.	0
Os06g0646700	1.13814	2.17227e-15			Conserved hypothetical protein.	0
Os07g0584900	1.13792	1.05452e-11			Armadillo-like helical domain containing protein.	Molecular Function: binding (GO:0005488), Molecular Function: protein binding (GO:0005515)
Os03g0388900	1.1377	4.49543e-09	OsMC1, MC1	0	Peptidase C14, caspase catalytic domain containing protein.	Biological Process: proteolysis (GO:0006508), Molecular Function: cysteine-type endopeptidase activity (GO:0004197)
Os04g0462600	1.13725	0.00033896			Dynein light chain, type 1 family protein.	Biological Process: microtubule-based process (GO:0007017), Cellular Component: microtubule associated complex (GO:0005875)
Os01g0784700	1.13654	1.19657e-08			Serine/threonine protein kinase-related domain containing protein.	Biological Process: protein phosphorylation (GO:0006468), Biological Process: recognition of pollen (GO:0048544), Molecular Function: protein kinase activity (GO:0004672), Molecular Function: protein serine/threonine kinase activity (GO:0004674), Molecular Function: protein binding (GO:0005515), Molecular Function: ATP binding (GO:0005524), Molecular Function: sugar binding (GO:0005529), Molecula…
Os08g0410500	1.13644	1.93775e-09			Similar to carbohydrate transporter/ sugar porter/ transporter.	Biological Process: transmembrane transport (GO:0055085), Cellular Component: integral to membrane (GO:0016021)
Os02g0652600	1.13583	0.000116795			Ribosomal protein L19 family protein.	0
Os01g0207400	1.13561	4.44384e-06			Similar to peptide-N4-asparagine amidase A.	0
Os04g0118700	1.1355	0.00115016			Pentatricopeptide repeat domain containing protein.	Molecular Function: binding (GO:0005488)
Os03g0857900	1.13495	3.4072e-07	LOGL5	LONELY GUY LIKE PHOSPHORIBOHYDROLASE 5	Similar to Lysine decarboxylase-like protein.	0
Os10g0483900	1.13429	9.19619e-05			Twin arginine translocation signal, Tat domain containing protein.	0
Os09g0542200	1.13249	6.62084e-19			Thioredoxin-like fold domain containing protein.	0
Os03g0223900	1.13213	0.000394336			UDP-3-O-acyl N-acetylglucosamine deacetylase domain containing protein.	Biological Process: lipid A biosynthetic process (GO:0009245), Molecular Function: UDP-3-O-[3-hydroxymyristoyl] N-acetylglucosamine deacetylase activity (GO:0008759)
Os09g0530750	1.13029	0.00648425			Hypothetical protein.	0
Os12g0605800	1.13017	1.1532e-07	OsL55	0	Similar to 3-methylcrotonyl CoA carboxylase biotin-containing subunit (Fragment).	Biological Process: metabolic process (GO:0008152), Molecular Function: catalytic activity (GO:0003824), Molecular Function: biotin carboxylase activity (GO:0004075), Molecular Function: ATP binding (GO:0005524), Molecular Function: ligase activity (GO:0016874), Molecular Function: metal ion binding (GO:0046872)
Os09g0380050	1.12881	1.99824e-09			Similar to catalytic/ ligase.	0
Os06g0661500	1.12819	2.67582e-06			Conserved hypothetical protein.	0
Os06g0614400	1.12761	0.000534127			Conserved hypothetical protein.	0
Os02g0646200	1.12495	0.000140493	OsBBX6	0	Zinc finger, B-box domain containing protein.	Cellular Component: intracellular (GO:0005622), Molecular Function: zinc ion binding (GO:0008270)
Os08g0113100	1.12483	2.08772e-07			Similar to Fructokinase (Fragment).	Molecular Function: phosphotransferase activity, alcohol group as acceptor (GO:0016773)
Os03g0705800	1.1248	1.59416e-05			Protein of unknown function DUF3049 domain containing protein.	0
Os05g0413200	1.12459	0.00867443	OsTUB6, TUBB6	BETA-TUBULIN 6	Beta-tubulin , Responseto gebberellin (GA) and brassinolide (BL)	Biological Process: microtubule-based process (GO:0007017), Biological Process: protein polymerization (GO:0051258), Molecular Function: GTPase activity (GO:0003924), Molecular Function: structural constituent of cytoskeleton (GO:0005200), Molecular Function: GTP binding (GO:0005525), Cellular Component: microtubule (GO:0005874), Cellular Component: protein complex (GO:0043234)
Os04g0523000	1.12421	1.47041e-05			Photosystem II oxygen evolving complex protein PsbQ family protein.	Biological Process: photosynthesis (GO:0015979), Cellular Component: photosystem II (GO:0009523), Cellular Component: oxygen evolving complex (GO:0009654), Cellular Component: extrinsic to membrane (GO:0019898), Molecular Function: calcium ion binding (GO:0005509)
Os03g0385400	1.12227	2.04248e-08	OsLLA1, OsLTPG6, OsLTPg6, OsLTPL1, LLA1, LTPG6, LTPg6, LTPL1	0	Bifunctional inhibitor/plant lipid transfer protein/seed storage domain containing protein.	Biological Process: lipid transport (GO:0006869)
Os02g0769900	1.12115	0.000692478			Pentatricopeptide repeat domain containing protein.	Molecular Function: binding (GO:0005488)
Os03g0815400	1.12024	8.08635e-05			Ribosomal protein L17-like protein.	Biological Process: translation (GO:0006412), Cellular Component: intracellular (GO:0005622), Cellular Component: ribosome (GO:0005840), Molecular Function: structural constituent of ribosome (GO:0003735)
Os05g0183100	1.11963	3.00421e-06	OsWRKY67	TRANSCRIPTION FACTOR WRKY67	Similar to WRKY transcription factor 16 (Fragment).	Biological Process: regulation of transcription, DNA-dependent (GO:0006355), Molecular Function: sequence-specific DNA binding transcription factor activity (GO:0003700), Molecular Function: sequence-specific DNA binding (GO:0043565)
Os04g0683900	1.11886	1.55831e-24			Protein of unknown function DUF296 domain containing protein.	0
Os01g0221800	1.11869	1.58927e-05			Non-protein coding transcript.	0
Os03g0210900	1.11843	6.78275e-07			Similar to predicted protein.	0
Os03g0109300	1.11816	6.05403e-08	LOGL3	LONELY GUY LIKE PHOSPHORIBOHYDROLASE 3	Similar to Lysine decarboxylase-like protein.	0
Os02g0126400	1.11752	5.89661e-07	OsCDPK4, OsCPK4, CDPK1	CALCIUM-DEPENDENT PROTEIN KINASE 4	Calcium-dependent protein kinase, Positive regulator of the salt and drought stress responses	Biological Process: protein phosphorylation (GO:0006468), Molecular Function: protein kinase activity (GO:0004672), Molecular Function: protein serine/threonine kinase activity (GO:0004674), Molecular Function: calcium ion binding (GO:0005509), Molecular Function: ATP binding (GO:0005524), Molecular Function: transferase activity, transferring phosphorus-containing groups (GO:0016772)
Os12g0549700	1.11711	0.00132878			Hypothetical conserved gene.	0
Os04g0616900	1.11681	2.58451e-12			Similar to H0525G02.14 protein.	0
Os07g0241700	1.11569	0.00297465			Similar to Cytokinin-N-glucosyltransferase 1.	Biological Process: metabolic process (GO:0008152), Molecular Function: transferase activity, transferring hexosyl groups (GO:0016758)
Os04g0119000	1.11524	3.07077e-06			Similar to H0716A07.5 protein.	0
Os01g0880200	1.11522	9.59185e-07			Glycosyl transferase, family 8 protein.	Molecular Function: transferase activity, transferring glycosyl groups (GO:0016757)
Os07g0669650	1.11478	1.42661e-26			Similar to Isoform 2 of Potassium transporter 7.	Biological Process: potassium ion transmembrane transport (GO:0071805), Cellular Component: membrane (GO:0016020), Molecular Function: potassium ion transmembrane transporter activity (GO:0015079)
Os11g0444400	1.11294	0.00213288			Conserved hypothetical protein.	0
Os06g0625800	1.11205	0.000140827			Pentatricopeptide repeat domain containing protein.	0
Os03g0323100	1.10664	0.000150348			Conserved hypothetical protein.	0
Os06g0233000	1.10618	8.63732e-09			Conserved hypothetical protein.	0
Os04g0684900	1.10418	0.00424692			Component of the CCR4-NOTcomplex, Deadenylase, Deadenylation (poly(A) tail shortening), Development and stress response	Molecular Function: nucleic acid binding (GO:0003676), Cellular Component: nucleus (GO:0005634)
Os04g0119400	1.10379	8.57001e-13			Similar to Pyruvate dehydrogenase E1 component, alpha subunit.	Biological Process: glycolysis (GO:0006096), Biological Process: metabolic process (GO:0008152), Biological Process: oxidation-reduction process (GO:0055114), Cellular Component: intracellular membrane-bounded organelle (GO:0043231), Molecular Function: pyruvate dehydrogenase (acetyl-transferring) activity (GO:0004739), Molecular Function: oxidoreductase activity, acting on the aldehyde or oxo gr…
Os10g0516500	1.10355	1.71517e-22			Conserved hypothetical protein.	0
Os09g0541000	1.10293	4.20849e-06	OsPIP2;7, PIP2.7, PIP2-7, OsPIP2-6	PLASMA MEMBRANE INTRINSIC PROTEIN 2;7	Similar to Aquaporin 2.	Biological Process: transport (GO:0006810), Biological Process: water transport (GO:0006833), Biological Process: transmembrane transport (GO:0055085), Cellular Component: membrane (GO:0016020), Cellular Component: integral to membrane (GO:0016021), Molecular Function: transporter activity (GO:0005215)
Os01g0178500	1.10098	1.50231e-08			A member of rice Aux/IAA family, Cross-talk of auxin and brassinosteroid signaling pathways, Plant morphogenesis	Molecular Function: protein binding (GO:0005515)
Os03g0265400	1.10056	1.65688e-05			Similar to 50S ribosomal protein L4, chloroplast precursor (R-protein L4).	Biological Process: translation (GO:0006412), Cellular Component: ribosome (GO:0005840), Molecular Function: structural constituent of ribosome (GO:0003735)
Os02g0198000	1.10008	0.00440352			Protein of unknown function DUF1677, Oryza sativa family protein.	0
Os04g0585000	1.09776	0.000261871			Similar to RING-H2 finger protein ATL1R.	0
Os01g0933075	1.09579	0.000164673			Hypothetical protein.	0
Os09g0517100	1.09441	9.89264e-05			NB-ARC domain containing protein.	Biological Process: defense response (GO:0006952), Molecular Function: ADP binding (GO:0043531)
Os06g0660800	1.09425	1.51066e-06			Protein kinase domain containing protein.	Biological Process: protein phosphorylation (GO:0006468), Molecular Function: protein kinase activity (GO:0004672), Molecular Function: ATP binding (GO:0005524), Molecular Function: transferase activity, transferring phosphorus-containing groups (GO:0016772)
Os02g0758200	1.09409	0.00666278			Conserved hypothetical protein.	0
Os11g0444900	1.09308	8.4626e-08			Octicosapeptide/Phox/Bem1p domain containing protein.	Molecular Function: protein binding (GO:0005515)
Os12g0152100	1.09284	4.9836e-06			Alpha/beta hydrolase fold-1 domain containing protein.	0
Os05g0551350	1.09265	3.86029e-05			Hypothetical conserved gene.	0
Os07g0644600	1.09252	0.00568883			Cytochrome P450 family protein.	Biological Process: oxidation-reduction process (GO:0055114), Molecular Function: iron ion binding (GO:0005506), Molecular Function: electron carrier activity (GO:0009055), Molecular Function: oxidoreductase activity, acting on paired donors, with incorporation or reduction of molecular oxygen (GO:0016705), Molecular Function: heme binding (GO:0020037)
Os02g0307800	1.09199	1.58835e-08			Protein of unknown function DUF3082 domain containing protein.	0
Os07g0693800	1.09119	5.94902e-08			Omega-3 fatty acid desaturase, Acclimation to low-temperature stress, Defense response	Biological Process: lipid metabolic process (GO:0006629), Biological Process: oxidation-reduction process (GO:0055114), Molecular Function: oxidoreductase activity, acting on paired donors, with oxidation of a pair of donors resulting in the reduction of molecular oxygen to two molecules of water (GO:0016717)
Os04g0530900	1.09102	0.00341271			Glycosyl transferase, family 8 protein.	Molecular Function: transferase activity, transferring glycosyl groups (GO:0016757)
Os04g0679400	1.08953	3.49072e-13			Similar to H0801D08.15 protein.	0
Os09g0321500	1.08628	6.28948e-08			Hypothetical conserved gene.	0
Os12g0173366	1.08524	0.000178698			Preprotein translocase Sec, Sec61-beta subunit, eukarya domain containing protein.	0
Os06g0714600	1.0844	0.00717263	OsRab11F1, OsPRA2, PRA2, OsPra2	0	Small G protein, Negative regulation of brassinosteroid signaling	Molecular Function: GTPase activity (GO:0003924), Molecular Function: GTP binding (GO:0005525)
Os02g0167300	1.08387	0.00020377	OsTUB5, TUBB5, OSTB-50, R2242	BETA-TUBULIN 5	Tubulin beta-3 chain (Beta-3 tubulin).	Biological Process: GTP catabolic process (GO:0006184), Biological Process: microtubule-based process (GO:0007017), Biological Process: microtubule-based movement (GO:0007018), Biological Process: protein polymerization (GO:0051258), Cellular Component: microtubule (GO:0005874), Cellular Component: protein complex (GO:0043234), Molecular Function: GTPase activity (GO:0003924), Molecular Function:…
Os03g0365250	1.08358	4.64118e-05			Conserved hypothetical protein.	0
Os07g0604000	1.08281	1.87827e-06			Similar to 6-phosphogluconolactonase-like protein.	Biological Process: carbohydrate metabolic process (GO:0005975), Biological Process: pentose-phosphate shunt (GO:0006098), Molecular Function: 6-phosphogluconolactonase activity (GO:0017057)
Os01g0808100	1.08279	9.01735e-06	OsbZIP08, OsbZIP8	b-ZIP TRANSCRIPTION FACTOR 8	Similar to BZIP transcription factor.	Biological Process: regulation of transcription, DNA-dependent (GO:0006355), Molecular Function: sequence-specific DNA binding transcription factor activity (GO:0003700), Molecular Function: sequence-specific DNA binding (GO:0043565), Molecular Function: protein dimerization activity (GO:0046983)
Os09g0492700	1.08059	1.7981e-05	HMGR II, Hmg2, HMGR2, HMGR 2, OsHMGR2	0	Similar to 3-hydroxy-3-methylglutaryl coenzyme A reductase (EC 1.1.1.34) (Fragment).	Biological Process: isoprenoid biosynthetic process (GO:0008299), Biological Process: coenzyme A metabolic process (GO:0015936), Biological Process: oxidation-reduction process (GO:0055114), Cellular Component: integral to membrane (GO:0016021), Molecular Function: hydroxymethylglutaryl-CoA reductase (NADPH) activity (GO:0004420), Molecular Function: oxidoreductase activity, acting on the CH-OH g…
Os03g0685750	1.07995	0.000254079			Hypothetical conserved gene.	0
Os05g0369900	1.07956	0.00756655			Exo70 exocyst complex subunit domain containing protein.	Biological Process: exocytosis (GO:0006887), Cellular Component: exocyst (GO:0000145)
Os10g0489650	1.0793	1.2126e-05			Conserved hypothetical protein.	0
Os11g0429900	1.07876	9.13442e-11			Non-protein coding transcript.	0
Os01g0786800	1.07857	2.25518e-17			Protein of unknown function DUF81 domain containing protein.	Cellular Component: integral to membrane (GO:0016021)
Os05g0348100	1.07687	3.20993e-07			Similar to CRR23 ((chlororespiratory reduction 23).	Biological Process: oxidation-reduction process (GO:0055114), Molecular Function: oxidoreductase activity, acting on NADH or NADPH, quinone or similar compound as acceptor (GO:0016655)
Os10g0181200	1.07593	1.94559e-07			Similar to binding protein.	Molecular Function: binding (GO:0005488)
Os01g0882400	1.07534	0.00305113			Protein of unknown function DUF679 domain containing protein.	0
Os05g0344400	1.07484	2.97356e-10			Uncharacterised protein family UPF0497, trans-membrane plant domain containing protein.	0
Os01g0773700	1.07422	1.05116e-05	PsbW	0	Similar to Photosystem II reaction center W protein (PSII 6.1 kDa protein) (Fragment).	0
Os03g0679800	1.0734	1.21158e-06			Similar to TPR Domain containing protein.	Molecular Function: binding (GO:0005488), Molecular Function: protein binding (GO:0005515)
Os04g0470700	1.07195	5.44578e-07	OsAAP7A, AAP7A, OsAAP13, AAP13	0	Amino acid transporter, transmembrane family protein.	0
Os06g0536850	1.0713	1.32908e-09			Non-protein coding transcript.	0
Os03g0762300	1.07128	0.00142122			Similar to Peroxidase 51 precursor (EC 1.11.1.7) (Atperox P51) (ATP37).	Biological Process: response to oxidative stress (GO:0006979), Biological Process: oxidation-reduction process (GO:0055114), Molecular Function: peroxidase activity (GO:0004601), Molecular Function: heme binding (GO:0020037)
Os02g0251800	1.07043	0.000430024	OsVQ6	0	VQ domain containing protein.	0
Os12g0120100	1.07026	0.00134382			Protein of unknown function DUF567 family protein.	Biological Process: cellular metabolic process (GO:0044237)
Os01g0524500	1.07006	0.000506895	OsMYBS1, MYBS1, Os-MYBS1, Mybs1	0	Conserved hypothetical protein.	0
Os12g0237000	1.06992	0.000683371			Hypothetical protein.	0
Os08g0480800	1.06894	1.37739e-18	GF14a, OsGF14a, WIN2, 14-3-3a	0	Similar to TaWIN2.	Molecular Function: protein domain specific binding (GO:0019904)
Os01g0726801	1.06893	3.18748e-06			Non-protein coding transcript.	0
Os12g0257500	1.0681	3.78017e-07			Conserved hypothetical protein.	0
Os07g0683200	1.06777	0.000489142	ONAC103, OsNAC18, NAC18	NAC DOMAIN-CONTAINING PROTEIN 103	Similar to NAC domain transcription factor.	Biological Process: regulation of transcription, DNA-dependent (GO:0006355), Molecular Function: DNA binding (GO:0003677)
Os06g0712200	1.06737	1.44937e-05			NUDIX domain containing protein.	Molecular Function: hydrolase activity (GO:0016787)
Os10g0522000	1.06677	2.8114e-07			Similar to Methyltransferase family protein, expressed.	Molecular Function: methyltransferase activity (GO:0008168)
Os05g0165800	1.06559	7.2076e-19			Hypothetical protein.	0
Os11g0177400	1.06461	0.000306689	OsABCG27	ABC TRANSPORTER G FAMILY MEMBER 27	Similar to ATPase, coupled to transmembrane movement of substances.	Cellular Component: membrane (GO:0016020), Molecular Function: ATP binding (GO:0005524), Molecular Function: ATPase activity (GO:0016887)
Os11g0236100	1.06446	6.26428e-08	sps11, OsSPS11, OsSPS5, SPS5	SUCROSE PHOSPHATE SYNTHASE 11	Similar to Sucrose-phosphate synthase.	Biological Process: biosynthetic process (GO:0009058)
Os02g0639100	1.06184	7.25958e-06	OsRLCK78	RECEPTOR-LIKE CYTOPLASMIC KINASE 78	Similar to H0801D08.12 protein.	Biological Process: protein phosphorylation (GO:0006468), Molecular Function: protein kinase activity (GO:0004672), Molecular Function: protein serine/threonine kinase activity (GO:0004674), Molecular Function: ATP binding (GO:0005524), Molecular Function: transferase activity, transferring phosphorus-containing groups (GO:0016772)
Os08g0484100	1.06058	1.30206e-07			Similar to predicted protein.	Biological Process: carbohydrate metabolic process (GO:0005975), Molecular Function: catalytic activity (GO:0003824), Molecular Function: cation binding (GO:0043169)
Os03g0840200	1.05909	3.61152e-08			Six-bladed beta-propeller, TolB-like domain containing protein.	0
Os03g0760500	1.05782	0.00505259			Cytochrome P450 family protein.	Biological Process: oxidation-reduction process (GO:0055114), Molecular Function: iron ion binding (GO:0005506), Molecular Function: electron carrier activity (GO:0009055), Molecular Function: oxidoreductase activity, acting on paired donors, with incorporation or reduction of molecular oxygen (GO:0016705), Molecular Function: heme binding (GO:0020037)
Os04g0543500	1.05775	1.51306e-05			Hypothetical conserved gene.	0
Os08g0520850	1.05696	2.26929e-09			Similar to chaperone protein dnaJ-related.	0
Os12g0188700	1.05667	1.95269e-09	OsTRX m5, Ostrxm	0	Similar to Thioredoxin M5, chloroplastic.	Biological Process: glycerol ether metabolic process (GO:0006662), Biological Process: cell redox homeostasis (GO:0045454), Molecular Function: electron carrier activity (GO:0009055), Molecular Function: protein disulfide oxidoreductase activity (GO:0015035)
Os02g0721700	1.05658	7.11043e-06			Similar to Gpi-anchored protein (Fragment).	0
Os02g0566400	1.05604	7.65084e-09			Similar to OSIGBa0152K17.7 protein.	0
Os05g0241200	1.05566	1.46904e-06	OsTPT2	TRIOSE PHOSPHATE/PHOSPHATE TRANSLOCATOR 2	Similar to Phophate translocator (Fragment).	Biological Process: transport (GO:0006810), Cellular Component: membrane (GO:0016020), Cellular Component: integral to membrane (GO:0016021), Molecular Function: transporter activity (GO:0005215)
Os08g0300300	1.05511	1.45141e-06	OsCBSCLC6, OsCBSCLC6a, OsCBSCLC6b	CYSTATHIONINE B-SYNTHASE DOMAIN CONTAINING CHLORIDE CHANNEL PROTEIN 6	Similar to Chloride channel-like protein Osclc.	Biological Process: chloride transport (GO:0006821), Biological Process: transmembrane transport (GO:0055085), Cellular Component: membrane (GO:0016020), Molecular Function: ion channel activity (GO:0005216), Molecular Function: voltage-gated chloride channel activity (GO:0005247), Molecular Function: protein binding (GO:0005515)
Os09g0397300	1.05477	6.86755e-06	OsTPS10	TREHALOSE-6-PHOSPHATE SYNTHASE 10	HAD-superfamily hydrolase subfamily IIB protein.	Biological Process: trehalose biosynthetic process (GO:0005992), Biological Process: metabolic process (GO:0008152), Molecular Function: catalytic activity (GO:0003824)
Os07g0661300	1.05463	1.23358e-06			Similar to Ubiquitin-specific protease 24.	Biological Process: ubiquitin-dependent protein catabolic process (GO:0006511), Molecular Function: ubiquitin thiolesterase activity (GO:0004221)
Os01g0168400	1.05248	0.00167297			Zinc finger, RING/FYVE/PHD-type domain containing protein.	Molecular Function: protein binding (GO:0005515), Molecular Function: zinc ion binding (GO:0008270)
Os02g0815300	1.05228	6.18119e-05			Hypothetical protein.	0
Os03g0773700	1.05167	0.00820613	OsRLCK117	RECEPTOR-LIKE CYTOPLASMIC KINASE 117	Similar to Receptor-like protein kinase 2.	Biological Process: protein phosphorylation (GO:0006468), Molecular Function: protein kinase activity (GO:0004672), Molecular Function: protein serine/threonine kinase activity (GO:0004674), Molecular Function: protein binding (GO:0005515), Molecular Function: ATP binding (GO:0005524), Molecular Function: transferase activity, transferring phosphorus-containing groups (GO:0016772)
Os09g0128750	1.05137	0.000161289			Hypothetical gene.	0
Os02g0731400	1.04976	0.00610854	OsUCL5	UCLACYANIN-LIKE PROTEIN 5	Similar to Chemocyanin precursor (Basic blue protein) (Plantacyanin).	Molecular Function: copper ion binding (GO:0005507), Molecular Function: electron carrier activity (GO:0009055)
Os05g0401300	1.04903	1.59896e-11			Mog1/PsbP, alpha/beta/alpha sandwich domain containing protein.	Biological Process: photosynthesis (GO:0015979), Cellular Component: photosystem II (GO:0009523), Cellular Component: oxygen evolving complex (GO:0009654), Cellular Component: extrinsic to membrane (GO:0019898), Molecular Function: calcium ion binding (GO:0005509)
Os03g0769100	1.04765	0.000180133			Similar to 9S ribosomal protein.	Biological Process: translation (GO:0006412), Cellular Component: intracellular (GO:0005622), Cellular Component: ribosome (GO:0005840), Molecular Function: structural constituent of ribosome (GO:0003735)
Os10g0493900	1.04617	4.08021e-06			Protein of unknown function DUF6, transmembrane domain containing protein.	Cellular Component: membrane (GO:0016020)
Os01g0635200	1.045	6.16916e-08			Homeodomain-like containing protein.	Molecular Function: DNA binding (GO:0003677), Molecular Function: protein binding (GO:0005515)
Os05g0390932	1.04449	0.000259445			Hypothetical protein.	0
Os08g0485900	1.04347	0.00065406			Haloacid dehalogenase-like hydrolase domain containing protein.	Biological Process: metabolic process (GO:0008152), Molecular Function: catalytic activity (GO:0003824), Molecular Function: hydrolase activity (GO:0016787)
Os01g0588200	1.04346	0.000255518			Voltage-dependent anion channel.	Biological Process: anion transport (GO:0006820), Biological Process: regulation of anion transport (GO:0044070), Biological Process: transmembrane transport (GO:0055085), Cellular Component: mitochondrial outer membrane (GO:0005741), Molecular Function: voltage-gated anion channel activity (GO:0008308)
Os06g0581000	1.04272	3.7936e-06			Similar to Nitrate transporter NTL1.	Biological Process: oligopeptide transport (GO:0006857), Cellular Component: membrane (GO:0016020), Molecular Function: transporter activity (GO:0005215)
Os02g0814800	1.04265	7.37157e-07			Glutathione S-transferase, C-terminal-like domain containing protein.	0
Os11g0528500	1.04247	0.000184951			Similar to Rubredoxin 1 (Rd-1).	Molecular Function: electron carrier activity (GO:0009055), Molecular Function: metal ion binding (GO:0046872)
Os12g0226900	1.04233	8.38678e-07	ClpC2	CLASS I CLP ATPASE C2	Similar to Allyl alcohol dehydrogenase.	Biological Process: oxidation-reduction process (GO:0055114), Molecular Function: nucleotide binding (GO:0000166), Molecular Function: zinc ion binding (GO:0008270), Molecular Function: oxidoreductase activity (GO:0016491)
Os04g0577300	1.04182	7.82386e-13	OsGELP58, OsGELP58a, OsGELP58b, OsGELP58c, OsGELP58d	GDSL ESTERASE/LIPASE PROTEIN 58	Similar to GDSL-motif lipase/hydrolase-like protein.	Biological Process: lipid metabolic process (GO:0006629), Molecular Function: hydrolase activity, acting on ester bonds (GO:0016788)
Os04g0630551	1.04164	0.00218718			Hypothetical gene.	0
Os03g0776100	1.04138	2.02987e-06			Hypothetical conserved gene.	0
Os05g0423500	1.04117	3.17169e-05			Protein kinase, core domain containing protein.	Biological Process: protein phosphorylation (GO:0006468), Molecular Function: protein kinase activity (GO:0004672), Molecular Function: protein serine/threonine kinase activity (GO:0004674), Molecular Function: ATP binding (GO:0005524), Molecular Function: transferase activity, transferring phosphorus-containing groups (GO:0016772)
Os05g0192700	1.04109	1.34589e-05			Conserved hypothetical protein.	0
Os12g0189700	1.04043	4.20764e-07			Twin arginine translocation signal, Tat domain containing protein.	Molecular Function: binding (GO:0005488)
Os02g0121600	1.04029	2.16201e-17			Similar to Zinc finger A20 domain-containing stress-associated protein 18.	0
Os02g0257300	1.03986	0.00622957	OsStr12, Str12, TROL, Os-TROL, OsTROL	SULFURTRANSFERASE 12	Rhodanese-like domain containing protein.	0
Os03g0178200	1.03951	6.24643e-05			Protein of unknown function YGGT family protein.	Cellular Component: membrane (GO:0016020)
Os03g0592500	1.03929	0.00062851	LHCB, LHCP II, Lhcb2	0	Similar to Photosystem II type II chlorophyll a/b binding protein (Fragment).	Biological Process: photosynthesis, light harvesting (GO:0009765), Cellular Component: membrane (GO:0016020)
Os04g0680800	1.03906	3.45734e-05	OsMLO4, MLO4	POWDERY-MILDEW-RESISTANCE PROTEIN O_	Mlo-related protein family protein.	Biological Process: cell death (GO:0008219), Cellular Component: integral to membrane (GO:0016021)
Os01g0857500	1.03798	0.000750895			Xanthine/uracil/vitamin C permease family protein.	Biological Process: transport (GO:0006810), Biological Process: transmembrane transport (GO:0055085), Cellular Component: membrane (GO:0016020), Molecular Function: transporter activity (GO:0005215)
Os01g0666000	1.0378	0.00271248			Similar to Lipid phosphate phosphatase 2 (EC 3.1.3.-) (AtLPP2) (Phosphatidic acid phosphatase 2) (AtPAP2) (Prenyl diphosphate phosphatase).	Cellular Component: membrane (GO:0016020), Molecular Function: catalytic activity (GO:0003824)
Os12g0609050	1.03406	2.99198e-12			Hypothetical conserved gene.	0
Os03g0319000	1.03254	0.000522926	OsVQ10	0	Similar to VQ motif family protein, expressed.	0
Os10g0460900	1.03198	2.8086e-05			Similar to cDNA clone:J013158D14, full insert sequence.	Molecular Function: binding (GO:0005488), Molecular Function: protein binding (GO:0005515)
Os03g0284400	1.03117	4.31298e-06			Similar to Ribosomal protein L10-like.	Biological Process: ribosome biogenesis (GO:0042254), Cellular Component: intracellular (GO:0005622)
Os06g0705100	1.03104	2.1844e-05			Similar to Thylakoid lumenal 13.3 kDa protein (P16.5) (Fragment).	0
Os08g0522400	1.03068	5.12718e-10			Similar to APX6; L-ascorbate peroxidase/ heme binding / peroxidase.	Biological Process: response to oxidative stress (GO:0006979), Biological Process: oxidation-reduction process (GO:0055114), Molecular Function: peroxidase activity (GO:0004601), Molecular Function: heme binding (GO:0020037)
Os01g0940600	1.03011	0.00212533			Conserved hypothetical protein.	0
Os06g0259901	1.03009	9.06402e-06			Non-protein coding transcript.	0
Os04g0540200	1.03008	7.14463e-05	OsBBX13	0	Zinc finger, B-box domain containing protein.	Cellular Component: intracellular (GO:0005622), Molecular Function: zinc ion binding (GO:0008270)
Os05g0478000	1.03006	0.00187661			Zinc finger, RING/FYVE/PHD-type domain containing protein.	Molecular Function: protein binding (GO:0005515), Molecular Function: zinc ion binding (GO:0008270)
Os01g0805000	1.03	9.86759e-05			50S ribosomal protein L34.	Biological Process: translation (GO:0006412), Cellular Component: intracellular (GO:0005622), Cellular Component: ribosome (GO:0005840), Molecular Function: structural constituent of ribosome (GO:0003735)
Os05g0104700	1.02757	0.00353132	Ospgip4, pgip4, OsPGIP4	POLYGALACTURONASE-INHIBITING PROTEIN 4	Leucine-rich repeat (LRR) protein, Inhibitor of fungal polygalacturonase, Defence response	Molecular Function: protein binding (GO:0005515)
Os02g0814400	1.027	0.00116338			Cytochrome c, monohaem domain containing protein.	Molecular Function: iron ion binding (GO:0005506), Molecular Function: electron carrier activity (GO:0009055), Molecular Function: heme binding (GO:0020037)
Os02g0775300	1.0266	1.04151e-08			Conserved hypothetical protein.	0
Os01g0688600	1.02592	1.13613e-07			Protein of unknown function DUF1639 family protein.	0
Os03g0187500	1.02588	4.04761e-05	Os_F0701	0	Leucine-rich repeat, cysteine-containing subtype containing protein.	0
Os07g0489800	1.02583	7.39172e-09	0	0	Beta-grasp fold, ferredoxin-type domain containing protein.	Molecular Function: electron carrier activity (GO:0009055), Molecular Function: iron-sulfur cluster binding (GO:0051536)
Os08g0516600	1.02508	1.03792e-05			Conserved hypothetical protein.	0
Os04g0651700	1.02482	0.000114488			Non-protein coding transcript.	0
Os12g0580400	1.02388	9.00252e-05	OsPUT2, OsLAT7	0	Similar to neutral amino acid transport protein.	Biological Process: amino acid transmembrane transport (GO:0003333), Biological Process: transport (GO:0006810), Biological Process: transmembrane transport (GO:0055085), Cellular Component: membrane (GO:0016020), Molecular Function: amino acid transmembrane transporter activity (GO:0015171)
Os08g0557100	1.02387	8.40876e-08			Similar to Nucleic acid-binding protein precursor.	Molecular Function: nucleotide binding (GO:0000166), Molecular Function: nucleic acid binding (GO:0003676)
Os12g0417100	1.02345	7.16031e-05			Hypothetical conserved gene.	0
Os01g0884300	1.02331	1.71781e-17	OsNAC6, ONAC048, NAC48, SNAC2, SNAC2/OsNAC6, OsNAC6/ONAC048, OsSNAC2	NAC DOMAIN-CONTAINING PROTEIN 6	No apical meristem (NAM) protein domain containing protein.	Biological Process: regulation of transcription, DNA-dependent (GO:0006355), Molecular Function: DNA binding (GO:0003677)
Os02g0697500	1.02299	4.36401e-06			Similar to Selenium-binding protein-like.	0
Os10g0363650	1.02285	0.00344706			Non-protein coding transcript.	0
Os07g0435300	1.02219	0.00014351	PsaE	0	Photosystem I reaction center subunit IV, chloroplast precursor (PSI- E) (Photosystem I 10.8 kDa polypeptide).	Biological Process: photosynthesis (GO:0015979), Cellular Component: photosystem I (GO:0009522), Cellular Component: photosystem I reaction center (GO:0009538)
Os01g0584250	1.02216	3.82448e-05			Hypothetical gene.	0
Os09g0375400	1.02124	4.5629e-06			Appr>p cyclic nucleotide phosphodiesterase domain containing protein.	0
Os01g0851000	1.02116	1.25826e-11			Carbohydrate/purine kinase domain containing protein.	0
Os02g0302200	1.02029	2.58451e-12			Similar to aminotransferase family protein.	Biological Process: cellular amino acid metabolic process (GO:0006520), Biological Process: biosynthetic process (GO:0009058), Biological Process: 1-aminocyclopropane-1-carboxylate biosynthetic process (GO:0042218), Molecular Function: catalytic activity (GO:0003824), Molecular Function: transaminase activity (GO:0008483), Molecular Function: transferase activity, transferring nitrogenous groups …
Os07g0141400	1.02014	0.000453124	PsbP, OsPsbP, psbP	0	Similar to 23 kDa polypeptide of photosystem II.	Biological Process: photosynthesis (GO:0015979), Cellular Component: photosystem II (GO:0009523), Cellular Component: oxygen evolving complex (GO:0009654), Cellular Component: extrinsic to membrane (GO:0019898), Molecular Function: calcium ion binding (GO:0005509)
Os11g0117300	1.01681	0.00115016			Conserved hypothetical protein.	0
Os04g0689500	1.01674	0.00820511			Similar to H0814G11.12 protein.	0
Os06g0637800	1.01674	0.000988701			Hypothetical gene.	0
Os01g0662700	1.01657	0.0013849			Similar to Naphthoate synthase (EC 4.1.3.36).	Biological Process: metabolic process (GO:0008152), Biological Process: menaquinone biosynthetic process (GO:0009234), Molecular Function: catalytic activity (GO:0003824), Molecular Function: 1, 4-dihydroxy-2-naphthoyl-CoA synthase activity (GO:0008935)
Os02g0161400	1.01628	2.31721e-09			Non-protein coding transcript.	0
Os12g0139300	1.01589	0.000343389	OsCPD2, CYP90A4, CYP90A4/OsCPD2	CYTOCHROME P450 90A4	Similar to Cytochrome P450 90A1 (EC 1.14.-.-).	Biological Process: oxidation-reduction process (GO:0055114), Molecular Function: iron ion binding (GO:0005506), Molecular Function: electron carrier activity (GO:0009055), Molecular Function: oxidoreductase activity, acting on paired donors, with incorporation or reduction of molecular oxygen (GO:0016705), Molecular Function: heme binding (GO:0020037)
Os01g0501800	1.01502	0.000191658	PsbO, psbO	0	Similar to Photosystem II oxygen-evolving complex protein 1 (Fragment).	Biological Process: photosynthesis (GO:0015979), Biological Process: photosystem II stabilization (GO:0042549), Cellular Component: photosystem II (GO:0009523), Cellular Component: oxygen evolving complex (GO:0009654), Cellular Component: extrinsic to membrane (GO:0019898), Molecular Function: calcium ion binding (GO:0005509)
Os12g0257450	1.01482	1.08493e-07			Non-protein coding transcript.	0
Os04g0686700	1.01397	1.00314e-06	OsFbox239, Os_F0304	0	Similar to H0701F11.1 protein.	0
Os04g0674000	1.01362	2.46934e-10			Similar to H0403D02.10 protein.	0
Os01g0228400	1.0133	2.28813e-11			Pentatricopeptide repeat domain containing protein.	Molecular Function: binding (GO:0005488)
Os09g0247700	1.0129	1.78e-10			Similar to Zinc finger, ZZ-type; Zinc finger, C2H2-type.	0
Os01g0953100	1.01087	3.0771e-05			Protein of unknown function DUF594 family protein.	0
Os06g0694400	1.00943	0.000170928			Conserved hypothetical protein.	0
Os10g0482000	1.00862	1.68795e-14			Conserved hypothetical protein.	0
Os06g0318700	1.0074	1.24162e-05	OsC3H41, MKRN	ZINC FINGER CCCH DOMAIN-CONTAINING PROTEIN 41	Zinc finger, RING/FYVE/PHD-type domain containing protein.	Molecular Function: nucleic acid binding (GO:0003676), Molecular Function: protein binding (GO:0005515), Molecular Function: zinc ion binding (GO:0008270)
Os03g0659300	1.00615	7.20821e-06			Glyoxalase/bleomycin resistance protein/dioxygenase domain containing protein.	0
Os02g0689500	1.00592	5.17594e-08			Similar to transposon protein.	0
Os03g0854000	1.00583	7.09246e-08			Butirosin biosynthesis, BtrG-like domain containing protein.	0
Os03g0137600	1.0055	0.0017528			Conserved hypothetical protein.	0
Os07g0622000	1.00543	2.18144e-09	OsSAPK2	STRESS/ABA-ACTIVATED PROTEIN KINASE 2	Serine/threonine protein kinase, Hyperosmotic stress response, Abscisic acid (ABA)-dependent gene regulation	Biological Process: protein phosphorylation (GO:0006468), Molecular Function: protein kinase activity (GO:0004672), Molecular Function: ATP binding (GO:0005524)
Os12g0512100	1.00515	4.56389e-05			Sugar/inositol transporter domain containing protein.	Biological Process: transport (GO:0006810), Biological Process: transmembrane transport (GO:0055085), Cellular Component: membrane (GO:0016020), Cellular Component: integral to membrane (GO:0016021), Molecular Function: transporter activity (GO:0005215), Molecular Function: transmembrane transporter activity (GO:0022857), Molecular Function: substrate-specific transmembrane transporter activity (…
Os06g0199050	1.00361	0.00737447			Similar to predicted protein.	0
Os04g0691600	1.0033	0.000283774			Similar to 30S ribosomal protein S17.	Biological Process: translation (GO:0006412), Cellular Component: intracellular (GO:0005622), Cellular Component: ribosome (GO:0005840), Molecular Function: structural constituent of ribosome (GO:0003735)
Os10g0417600	1.00258	3.98007e-12	OsGME1, GME1	0	NAD(P)-binding domain containing protein.	Biological Process: cellular metabolic process (GO:0044237), Molecular Function: nucleotide binding (GO:0000166), Molecular Function: catalytic activity (GO:0003824), Molecular Function: coenzyme binding (GO:0050662)
Os05g0102400	0.999921	0.00191558			Similar to exonuclease.	Cellular Component: intracellular (GO:0005622), Molecular Function: nucleic acid binding (GO:0003676), Molecular Function: exonuclease activity (GO:0004527)
Os02g0123400	0.999265	0.000204307			Hypothetical conserved gene.	0
Os07g0294300	0.995543	1.80035e-05			Conserved hypothetical protein.	0
Os03g0645200	0.995055	0.00675457			Similar to Translation initiation factor eIF-2B delta subunit (eIF-2B GDP-GTP exchange factor).	Biological Process: cellular metabolic process (GO:0044237)
Os10g0574700	0.99402	6.11418e-07			Protein of unknown function DUF597 family protein.	0
Os06g0698500	0.993874	0.000132856			Protein of unknown function DUF1336 domain containing protein.	0
Os01g0882500	0.9931	4.50495e-06			Similar to NADH dehydrogenase I subunit N.	Biological Process: oxidation-reduction process (GO:0055114), Cellular Component: membrane (GO:0016020), Molecular Function: oxidoreductase activity, acting on NADH or NADPH, quinone or similar compound as acceptor (GO:0016655)
Os03g0191200	0.992532	9.30856e-05			WW/Rsp5/WWP domain containing protein.	Molecular Function: protein binding (GO:0005515)
Os07g0670300	0.992034	0.000334413			C2 calcium-dependent membrane targeting domain containing protein.	Molecular Function: protein binding (GO:0005515)
Os12g0115900	0.991259	0.00171844			Translation elongation factor P domain containing protein.	Biological Process: translational elongation (GO:0006414), Biological Process: peptide biosynthetic process (GO:0043043), Cellular Component: cytoplasm (GO:0005737), Molecular Function: translation elongation factor activity (GO:0003746)
Os05g0186900	0.990734	4.96516e-08	OsIAA16	0	Similar to Auxin-responsive protein IAA16.	0
Os05g0517200	0.990519	2.58499e-13	OsTPS6	TREHALOSE-6-PHOSPHATE SYNTHASE 6	HAD-superfamily hydrolase subfamily IIB protein.	Biological Process: trehalose biosynthetic process (GO:0005992), Biological Process: metabolic process (GO:0008152), Molecular Function: catalytic activity (GO:0003824)
Os07g0243150	0.99047	0.000122921			Hypothetical conserved gene.	0
Os06g0663800	0.988172	4.16307e-06	OsFKBP13	_	Similar to FKBP-type peptidyl-prolyl cis-trans isomerase 3, chloroplast precursor (EC 5.2.1.8) (PPIase) (Rotamase) (AtFKBP13) (FK506 binding protein 1).	Biological Process: protein folding (GO:0006457)
Os07g0406300	0.987817	2.26503e-07	OsG6PDH3, OsG6PDH2	0	Similar to Glucose-6-phosphate 1-dehydrogenase.	Biological Process: glucose metabolic process (GO:0006006), Biological Process: oxidation-reduction process (GO:0055114), Molecular Function: nucleotide binding (GO:0000166), Molecular Function: glucose-6-phosphate dehydrogenase activity (GO:0004345), Molecular Function: NADP binding (GO:0050661)
Os01g0734600	0.986757	3.68857e-06			UDP-glucuronosyl/UDP-glucosyltransferase family protein.	Biological Process: metabolic process (GO:0008152), Molecular Function: transferase activity, transferring hexosyl groups (GO:0016758)
Os03g0717000	0.985845	0.00119581	OsTMK	TRANSMEMBRANE KINASE	Similar to TMK protein precursor.	Biological Process: protein phosphorylation (GO:0006468), Molecular Function: protein kinase activity (GO:0004672), Molecular Function: protein serine/threonine kinase activity (GO:0004674), Molecular Function: ATP binding (GO:0005524), Molecular Function: transferase activity, transferring phosphorus-containing groups (GO:0016772)
Os01g0191200	0.985657	0.0005717			Similar to Acid phosphatase.	Molecular Function: acid phosphatase activity (GO:0003993)
Os02g0159200	0.985642	7.21943e-05			Protein of unknown function DUF292, eukaryotic domain containing protein.	0
Os11g0175400	0.983881	0.00117391	OsNIN6	NEUTRAL/ALKALINE INVERTASE 6	Plant neutral invertase family protein.	Molecular Function: catalytic activity (GO:0003824)
Os10g0161700	0.983676	0.00742691	Os_F0753	0	Protein of unknown function DUF295 family protein.	0
Os10g0340800	0.983117	0.00798293			Conserved hypothetical protein.	0
Os03g0857000	0.982945	1.38958e-08			Hypothetical conserved gene.	0
Os10g0551200	0.9813	8.61775e-06			Similar to Scl1 protein (Fragment).	0
Os10g0460000	0.980444	0.00026934			Conserved hypothetical protein.	0
Os01g0535900	0.976404	3.04623e-08			Similar to methyltransferase.	Biological Process: tRNA modification (GO:0006400), Molecular Function: tRNA (guanine-N7-)-methyltransferase activity (GO:0008176)
Os03g0360600	0.976208	3.22228e-05			Mitochodrial transcription termination factor-related family protein.	0
Os09g0391800	0.975047	0.00688015			Hypothetical gene.	0
Os07g0105600	0.974586	2.26144e-05			Photosystem II oxygen evolving complex protein PsbQ family protein.	Biological Process: photosynthesis (GO:0015979), Cellular Component: photosystem II (GO:0009523), Cellular Component: oxygen evolving complex (GO:0009654), Cellular Component: extrinsic to membrane (GO:0019898), Molecular Function: calcium ion binding (GO:0005509)
Os04g0601800	0.974081	1.45136e-07			Similar to Plastid protein.	0
Os02g0729400	0.973312	8.11741e-08	OsStr11, OsCAS, Cas	SULFURTRANSFERASE 11	Similar to Extracellular calcium sensing receptor.	0
Os01g0589800	0.973285	1.32005e-06			Similar to OHP2.	0
Os05g0231700	0.973022	9.1594e-11	OsTIP4;1, TIP4-1	TONOPLAST INTRINSIC PROTEIN 4;1	Similar to Tonoplast intrinsic protein.	Biological Process: transport (GO:0006810), Cellular Component: membrane (GO:0016020), Molecular Function: transporter activity (GO:0005215)
Os01g0131600	0.97245	2.41003e-08	OsAP2, OsERF#108, OsERF108, AP2/EREBP#001, AP2/EREBP1, RD2	ETHYLENE RESPONSE FACTOR 108	Hypothetical conserved gene.	0
Os08g0396500	0.971237	1.38725e-05			Hypothetical conserved gene.	Biological Process: oxidation-reduction process (GO:0055114), Molecular Function: protein-disulfide reductase activity (GO:0047134)
Os06g0349800	0.971155	1.58927e-05			Conserved hypothetical protein.	0
Os05g0199700	0.969804	0.000128126			Non-protein coding transcript.	0
Os04g0565500	0.969779	0.00018312	OsANT4, ANT4, FCO8	0	Similar to OSIGBa0158F05.8 protein.	0
Os04g0306750	0.969452	2.02746e-05			Similar to OSIGBa0096F13.8 protein.	0
Os12g0507350	0.969334	1.87785e-07			Non-protein coding transcript.	0
Os03g0154100	0.968853	7.07625e-09			Aromatic-ring hydroxylase family protein.	Biological Process: metabolic process (GO:0008152), Molecular Function: oxidoreductase activity (GO:0016491)
Os04g0412300	0.968422	1.4423e-08			Similar to H0717B12.10 protein.	Biological Process: carbohydrate metabolic process (GO:0005975), Molecular Function: catalytic activity (GO:0003824), Molecular Function: hydrolase activity, hydrolyzing O-glycosyl compounds (GO:0004553), Molecular Function: cation binding (GO:0043169)
Os02g0537700	0.967729	9.66537e-06	BAS1, OsTPX, Os2-Cys PrxA, 2-Cys PrxA, Os2-CysPrxA, 2-CysPrxA, 2CYSPRXA	0	2-Cys peroxiredoxin (EC 1.11.1.15), Stomatal closure, Potassium deficiency tolerance	Biological Process: cell redox homeostasis (GO:0045454), Biological Process: oxidation-reduction process (GO:0055114), Molecular Function: antioxidant activity (GO:0016209), Molecular Function: oxidoreductase activity (GO:0016491), Molecular Function: peroxiredoxin activity (GO:0051920)
Os11g0157300	0.966889	0.000939475			Harpin-induced 1 domain containing protein.	0
Os09g0565200	0.96495	2.38549e-06	0	0	Similar to Nucleic acid-binding protein precursor.	0
Os10g0506900	0.964822	1.20572e-09			Hypothetical conserved gene.	0
Os01g0827400	0.964796	0.00252776			Prenylated rab acceptor PRA1 family protein.	0
Os04g0106400	0.964644	0.00545674			NAD(P)-binding domain containing protein.	Biological Process: metabolic process (GO:0008152), Biological Process: oxidation-reduction process (GO:0055114), Molecular Function: nucleotide binding (GO:0000166), Molecular Function: oxidoreductase activity, acting on the CH-OH group of donors, NAD or NADP as acceptor (GO:0016616), Molecular Function: cofactor binding (GO:0048037), Molecular Function: NAD binding (GO:0051287)
Os01g0720700	0.963881	5.58008e-05	OsSAT, SAT	0	Similar to satase isoform I.	0
Os03g0342400	0.963514	0.000705548			Similar to H0307D04.14 protein.	0
Os04g0643600	0.963471	7.57985e-09	OsCNGC8, OsCNGC6	0	Similar to Cyclic nucleotide-gated channel C (Fragment).	Molecular Function: protein binding (GO:0005515)
Os06g0329300	0.962606	3.2323e-05			Conserved hypothetical protein.	0
Os01g0806200	0.961318	0.00354217			Cyclin-like F-box domain containing protein.	Molecular Function: protein binding (GO:0005515)
Os05g0355400	0.961227	0.000175176	UspA	_	UspA domain containing protein.	Biological Process: response to stress (GO:0006950)
Os10g0166600	0.960375	1.2995e-05			Cytochrome P450 family protein.	Biological Process: oxidation-reduction process (GO:0055114), Molecular Function: iron ion binding (GO:0005506), Molecular Function: electron carrier activity (GO:0009055), Molecular Function: oxidoreductase activity, acting on paired donors, with incorporation or reduction of molecular oxygen (GO:0016705), Molecular Function: heme binding (GO:0020037)
Os02g0187300	0.960161	0.000144826			Similar to predicted protein.	0
Os01g0176700	0.959846	0.00228277	0	0	Myb-like DNA-binding domain, SHAQKYF class domain containing protein.	Biological Process: regulation of transcription, DNA-dependent (GO:0006355), Molecular Function: DNA binding (GO:0003677), Molecular Function: protein binding (GO:0005515)
Os04g0461100	0.958781	7.98592e-06			Ribosomal protein, PSRP-3/Ycf65 domain containing protein.	Biological Process: translation (GO:0006412), Cellular Component: intracellular (GO:0005622), Cellular Component: ribosome (GO:0005840), Cellular Component: plastid (GO:0009536), Molecular Function: structural constituent of ribosome (GO:0003735)
Os04g0669600	0.95774	1.73049e-05			Phospholipase/carboxylesterase domain containing protein.	Molecular Function: hydrolase activity (GO:0016787)
Os01g0885200	0.955966	1.09782e-10			Uncharacterised conserved protein UCP031277 domain containing protein.	0
Os05g0163200	0.955787	8.13421e-14			Non-protein coding transcript.	0
Os05g0127400	0.955333	0.00527908	OsDjB5	0	Similar to DnaJ subfamily B member 13.	Molecular Function: heat shock protein binding (GO:0031072)
Os05g0171050	0.954653	0.00629096			Similar to Phospholipase D alpha 1 precursor (EC 3.1.4.4) (PLD alpha 1) (Choline phosphatase 1) (Phosphatidylcholine-hydrolyzing phospholipase D 1).	0
Os03g0178066	0.954274	1.31572e-06			Hypothetical gene.	0
Os07g0673400	0.954166	1.48164e-08	OsUsp1	0	Rossmann-like alpha/beta/alpha sandwich fold domain containing protein.	Biological Process: response to stress (GO:0006950)
Os07g0140232	0.953745	0.00450558			Similar to Thaumatin-like protein 1.	0
Os05g0547800	0.952656	0.000602158			Conserved hypothetical protein.	0
Os12g0583900	0.952526	9.31951e-13			Similar to PDE135 (PIGMENT DEFECTIVE EMBRYO 135); transmembrane transporter.	Biological Process: transport (GO:0006810), Biological Process: transmembrane transport (GO:0055085), Cellular Component: membrane (GO:0016020), Molecular Function: transporter activity (GO:0005215)
Os12g0498500	0.952343	4.12438e-06			Similar to DnaJ domain containing protein, expressed.	Molecular Function: heat shock protein binding (GO:0031072)
Os04g0397500	0.95071	9.38897e-06			Similar to gt-2-related.	0
Os01g0389700	0.950214	0.00266082			Protein of unknown function DUF679 family protein.	0
Os08g0137400	0.949925	0.00120834	OsUCL23	UCLACYANIN-LIKE PROTEIN 23	Cupredoxin domain containing protein.	Molecular Function: copper ion binding (GO:0005507), Molecular Function: electron carrier activity (GO:0009055)
Os01g0227400	0.949498	4.16211e-05			Similar to Cytochrome P450 71A1 (EC 1.14.-.-) (CYPLXXIA1) (ARP-2).	Biological Process: oxidation-reduction process (GO:0055114), Molecular Function: iron ion binding (GO:0005506), Molecular Function: electron carrier activity (GO:0009055), Molecular Function: oxidoreductase activity, acting on paired donors, with incorporation or reduction of molecular oxygen (GO:0016705), Molecular Function: heme binding (GO:0020037)
Os03g0232000	0.949164	0.00171025	OsFbox136, Os_F0187	0	Cyclin-like F-box domain containing protein.	Molecular Function: protein binding (GO:0005515)
Os04g0686300	0.948733	1.65086e-05			Protein of unknown function DUF167 family protein.	0
Os11g0195500	0.948705	0.000117626	PAD4, OsPAD4	0	Hypothetical conserved gene.	Biological Process: lipid metabolic process (GO:0006629), Molecular Function: triglyceride lipase activity (GO:0004806)
Os07g0567400	0.948403	0.0071342			Similar to Cytochrome c6.	Molecular Function: iron ion binding (GO:0005506), Molecular Function: electron carrier activity (GO:0009055), Molecular Function: heme binding (GO:0020037)
Os03g0167500	0.946379	1.09782e-10	OsRMR3, OsRMR1, RMR1	0	Splicing isoform of OsRMR1	Molecular Function: protein binding (GO:0005515), Molecular Function: zinc ion binding (GO:0008270)
Os10g0523700	0.945778	1.28592e-10	ADT	0	Prephenate dehydratase domain containing protein.	Biological Process: L-phenylalanine biosynthetic process (GO:0009094), Molecular Function: prephenate dehydratase activity (GO:0004664)
Os06g0574100	0.945777	2.04571e-06			Similar to predicted protein.	0
Os02g0722700	0.945441	2.50728e-17			Similar to Nucleic acid binding protein.	Molecular Function: RNA binding (GO:0003723)
Os04g0539000	0.945438	9.72633e-08			Protein of unknown function DUF2485 domain containing protein.	Biological Process: oxidation-reduction process (GO:0055114), Molecular Function: oxidoreductase activity, acting on NADH or NADPH, quinone or similar compound as acceptor (GO:0016655)
Os03g0116700	0.945427	3.15783e-14	OsFbox127, Os_F0532	0	Cyclin-like F-box domain containing protein.	Molecular Function: protein binding (GO:0005515)
Os04g0175600	0.945392	0.00842396	OsCOMTL5	CAFFEIC ACID 3-O-METHYLTRANSFERASE LIKE 5	Similar to 0-methyltransferase (EC 2.1.1.6) (Fragment).	Molecular Function: methyltransferase activity (GO:0008168), Molecular Function: O-methyltransferase activity (GO:0008171), Molecular Function: protein dimerization activity (GO:0046983)
Os10g0492900	0.945302	1.84878e-05			Similar to alpha-galactosidase.	Biological Process: carbohydrate metabolic process (GO:0005975), Biological Process: metabolic process (GO:0008152), Molecular Function: catalytic activity (GO:0003824), Molecular Function: hydrolase activity, hydrolyzing O-glycosyl compounds (GO:0004553)
Os03g0331600	0.945203	2.13823e-05	OsLCAA	0	Uncharacterised protein family Ycf54 domain containing protein.	0
Os08g0484500	0.944894	3.95625e-08			Similar to Phospho-2-dehydro-3-deoxyheptonate aldolase 1, chloroplast precursor (EC 2.5.1.54) (Phospho-2-keto-3-deoxyheptonate aldolase 1) (DAHP synthetase 1) (3-deoxy-D-arabino-heptulosonate 7-phosphate synthase 1).	Biological Process: aromatic amino acid family biosynthetic process (GO:0009073), Molecular Function: 3-deoxy-7-phosphoheptulonate synthase activity (GO:0003849)
Os07g0110650	0.944768	2.53216e-05			Hypothetical gene.	0
Os04g0611300	0.944716	3.46599e-05			Conserved hypothetical protein.	0
Os04g0587400	0.944049	1.69627e-05	OsPUP6	PURINE PERMEASE 6	Protein of unknown function DUF250 domain containing protein.	0
Os06g0481000	0.944038	1.42275e-06			Non-protein coding transcript.	0
Os04g0462300	0.943457	0.00139873			Conserved hypothetical protein.	0
Os03g0268600	0.94315	6.23203e-05	OsPP2C30, PP2C30, OsPP48, PP48	0	Similar to Protein phosphatase type 2C.	Biological Process: protein dephosphorylation (GO:0006470), Cellular Component: protein serine/threonine phosphatase complex (GO:0008287), Molecular Function: catalytic activity (GO:0003824), Molecular Function: protein serine/threonine phosphatase activity (GO:0004722)
Os02g0224800	0.943096	3.15783e-14			Ndr family protein.	0
Os03g0184050	0.94228	1.06593e-06			Non-protein coding transcript.	0
Os02g0672700	0.941412	6.03032e-07			DNA-directed RNA polymerase, M/15 kDa subunit domain containing protein.	Biological Process: transcription, DNA-dependent (GO:0006351), Molecular Function: nucleic acid binding (GO:0003676), Molecular Function: DNA-directed RNA polymerase activity (GO:0003899), Molecular Function: protein binding (GO:0005515), Molecular Function: zinc ion binding (GO:0008270)
Os04g0449900	0.940938	8.25544e-07			Similar to RNA Binding Protein 47.	Molecular Function: nucleotide binding (GO:0000166), Molecular Function: nucleic acid binding (GO:0003676)
Os01g0959900	0.940525	3.83104e-06			Similar to predicted protein.	Biological Process: oxidation-reduction process (GO:0055114), Cellular Component: plasma membrane (GO:0005886), Molecular Function: oxidoreductase activity, acting on NADH or NADPH, quinone or similar compound as acceptor (GO:0016655)
Os08g0246400	0.940468	8.75707e-08			Similar to Ubiquinol-cytochrome c reductase complex 14 kDa protein (EC 1.10.2.2) (CR14).	Biological Process: mitochondrial electron transport, ubiquinol to cytochrome c (GO:0006122), Molecular Function: ubiquinol-cytochrome-c reductase activity (GO:0008121)
Os01g0521500	0.93979	0.000244123	OsDjC8	0	Heat shock protein DnaJ family protein.	Biological Process: protein folding (GO:0006457), Molecular Function: heat shock protein binding (GO:0031072), Molecular Function: unfolded protein binding (GO:0051082)
Os07g0160300	0.939544	5.09244e-07			Shikimate kinase domain containing protein.	Molecular Function: shikimate kinase activity (GO:0004765), Molecular Function: ATP binding (GO:0005524)
Os06g0664200	0.938513	0.000121169			Inositol monophosphatase/Fructose-1, 6-bisphosphatase domain containing protein.	Biological Process: carbohydrate metabolic process (GO:0005975), Molecular Function: phosphoric ester hydrolase activity (GO:0042578)
Os08g0545700	0.937256	0.00126934			Similar to TraB protein-related.	0
Os03g0125000	0.935884	2.66e-05	0	0	Similar to 50S ribosomal protein L5, chloroplast.	Biological Process: translation (GO:0006412), Cellular Component: intracellular (GO:0005622), Cellular Component: ribosome (GO:0005840), Molecular Function: structural constituent of ribosome (GO:0003735)
Os01g0678600	0.935696	6.0892e-05	0	0	Ribosomal protein S20 family protein.	Biological Process: translation (GO:0006412), Cellular Component: intracellular (GO:0005622), Cellular Component: ribosome (GO:0005840), Molecular Function: RNA binding (GO:0003723), Molecular Function: structural constituent of ribosome (GO:0003735)
Os01g0132766	0.935686	0.000643711			Zinc finger, C2H2-like domain containing protein.	Cellular Component: intracellular (GO:0005622), Molecular Function: nucleic acid binding (GO:0003676), Molecular Function: zinc ion binding (GO:0008270)
Os03g0183300	0.935629	2.68149e-05	OsERF#064, OsERF064, OsERF64, AP2/EREBP#029, AP2/EREBP29, OsBIERF4, BIERF4	ETHYLENE RESPONSE FACTOR 64	Pathogenesis-related transcriptional factor and ERF domain containing protein.	Biological Process: regulation of transcription, DNA-dependent (GO:0006355), Molecular Function: DNA binding (GO:0003677), Molecular Function: sequence-specific DNA binding transcription factor activity (GO:0003700)
Os02g0313450	0.935285	0.000194666			Conserved hypothetical protein.	0
Os03g0751100	0.934777	0.000950283	OPT, OsOPT7, OPT7	0	Iron-deficiency-regulated oligopeptide transporter, Iron homeostasis	Biological Process: transmembrane transport (GO:0055085)
Os07g0290200	0.934608	0.00766711	OsLTPd4, OsLtpIV.4	0	Plant lipid transfer protein/seed storage/trypsin-alpha amylase inhibitor domain containing protein.	Biological Process: lipid transport (GO:0006869)
Os01g0238200	0.93358	2.26235e-06			Conserved hypothetical protein.	0
Os03g0227700	0.933474	0.00037188	OsDWARF4, osdwarf4, OsDWF4, CYP90B2	CYTOCHROME P450	Cytochrome P450 family protein.	Biological Process: oxidation-reduction process (GO:0055114), Molecular Function: iron ion binding (GO:0005506), Molecular Function: electron carrier activity (GO:0009055), Molecular Function: oxidoreductase activity, acting on paired donors, with incorporation or reduction of molecular oxygen (GO:0016705), Molecular Function: heme binding (GO:0020037)
Os02g0720100	0.932239	0.00667674	OsENODL8	EARLY NODULIN LIKE PROTEIN 8	Cupredoxin domain containing protein.	Molecular Function: copper ion binding (GO:0005507), Molecular Function: electron carrier activity (GO:0009055)
Os03g0686500	0.932128	4.64012e-05			Conserved hypothetical protein.	0
Os10g0508700	0.931721	0.000126506			Pectinesterase inhibitor domain containing protein.	Molecular Function: enzyme inhibitor activity (GO:0004857), Molecular Function: pectinesterase activity (GO:0030599)
Os03g0345700	0.931357	0.000155264			Similar to Heavy metal-associated domain containing protein, expressed.	0
Os04g0665000	0.931085	8.07942e-06			CHCH domain containing protein.	0
Os09g0414600	0.929784	5.30345e-12	OsZHD9	0	Conserved hypothetical protein.	0
Os11g0139700	0.92962	1.02102e-05			Hypothetical conserved gene.	0
Os06g0695800	0.92949	0.00223841	OsENA2, OsABCI12	ABC TRANSPORTER I12	Phosphate transport system permease protein 1 domain containing protein.	Biological Process: phosphate ion transmembrane transport (GO:0035435), Cellular Component: membrane (GO:0016020), Molecular Function: nucleotide binding (GO:0000166), Molecular Function: inorganic phosphate transmembrane transporter activity (GO:0005315), Molecular Function: ATP binding (GO:0005524), Molecular Function: ATPase activity (GO:0016887), Molecular Function: nucleoside-triphosphatase …
Os02g0557000	0.92918	0.00522429			CARP motif domain containing protein.	Molecular Function: binding (GO:0005488)
Os05g0440100	0.92918	0.0027801			Similar to (RAP Annotation release2) Histone deacetylase superfamily protein.	0
Os02g0328300	0.928694	1.19242e-05			Phenol hydroxylase reductase family protein.	Biological Process: oxidation-reduction process (GO:0055114), Molecular Function: oxidoreductase activity (GO:0016491)
Os01g0813800	0.927679	0.000192717	Os1bglu3, Os1Bglu3	BETA-GLUCOSIDASE 3	Similar to Beta-glucosidase 3.	Biological Process: carbohydrate metabolic process (GO:0005975), Molecular Function: catalytic activity (GO:0003824), Molecular Function: hydrolase activity, hydrolyzing O-glycosyl compounds (GO:0004553), Molecular Function: cation binding (GO:0043169)
Os04g0306400	0.927674	4.60687e-08	OsRPI, RPI	0	Ribose 5-phosphate isomerase family protein.	Biological Process: pentose-phosphate shunt, non-oxidative branch (GO:0009052), Molecular Function: ribose-5-phosphate isomerase activity (GO:0004751)
Os06g0647100	0.927283	0.000139814			Similar to 50S ribosomal protein L35, chloroplast precursor (CL35).	Biological Process: translation (GO:0006412), Cellular Component: intracellular (GO:0005622), Cellular Component: ribosome (GO:0005840), Molecular Function: structural constituent of ribosome (GO:0003735)
Os02g0700500	0.927203	0.0022699	OsPUT1, PUT, OsLAT1	0	Polyamine uptake transporter, High-affinity spermidine transporter, Import of spermidine transported via phloem, Polyamine uptake	Biological Process: amino acid transmembrane transport (GO:0003333), Molecular Function: amino acid transmembrane transporter activity (GO:0015171), Cellular Component: membrane (GO:0016020)
Os01g0227800	0.926604	2.25602e-06			Similar to cDNA, clone: J075083L18, full insert sequence.	Biological Process: oxidation-reduction process (GO:0055114), Molecular Function: iron ion binding (GO:0005506), Molecular Function: electron carrier activity (GO:0009055), Molecular Function: oxidoreductase activity, acting on paired donors, with incorporation or reduction of molecular oxygen (GO:0016705), Molecular Function: heme binding (GO:0020037)
Os01g0710700	0.926239	3.07077e-06	0	0	Lipase, class 3 family protein.	Biological Process: lipid metabolic process (GO:0006629), Molecular Function: triglyceride lipase activity (GO:0004806)
Os02g0693200	0.925901	5.81217e-09	OsDjC20	0	Similar to Chaperone protein dnaJ.	Biological Process: protein folding (GO:0006457), Molecular Function: heat shock protein binding (GO:0031072), Molecular Function: unfolded protein binding (GO:0051082)
Os10g0510000	0.9251	9.75396e-05	RAc2	0	Similar to actin.	Molecular Function: ATP binding (GO:0005524)
Os08g0507702	0.924068	0.00471021			Cytochrome P450 family protein.	Biological Process: oxidation-reduction process (GO:0055114), Molecular Function: iron ion binding (GO:0005506), Molecular Function: electron carrier activity (GO:0009055), Molecular Function: oxidoreductase activity, acting on paired donors, with incorporation or reduction of molecular oxygen (GO:0016705), Molecular Function: heme binding (GO:0020037)
Os05g0291700	0.923323	0.000320516			Similar to PTAC16 (PLASTID TRANSCRIPTIONALLY ACTIVE18); binding / catalytic.	Molecular Function: nucleotide binding (GO:0000166)
Os04g0290400	0.923225	0.00097554			Conserved hypothetical protein.	0
Os07g0556200	0.922881	7.33759e-07	PetC	0	Rieske [2Fe-2S] region domain containing protein.	Biological Process: photosynthesis (GO:0015979), Biological Process: oxidation-reduction process (GO:0055114), Cellular Component: membrane (GO:0016020), Cellular Component: thylakoid membrane (GO:0042651), Molecular Function: ubiquinol-cytochrome-c reductase activity (GO:0008121), Molecular Function: plastoquinol-plastocyanin reductase activity (GO:0009496), Molecular Function: oxidoreductase ac…
Os04g0608600	0.922815	1.78322e-05			Alkyl hydroperoxide reductase subunit C/ Thiol specific antioxidant domain containing protein.	Biological Process: oxidation-reduction process (GO:0055114), Molecular Function: antioxidant activity (GO:0016209), Molecular Function: oxidoreductase activity (GO:0016491)
Os07g0546600	0.921309	0.00128846			Similar to Translation releasing factor RF-2.	Biological Process: translational termination (GO:0006415), Cellular Component: cytoplasm (GO:0005737), Molecular Function: translation release factor activity (GO:0003747), Molecular Function: translation release factor activity, codon specific (GO:0016149)
Os09g0249900	0.921076	1.34097e-08			Similar to Ferredoxin-thioredoxin reductase catalytic chain.	Biological Process: oxidation-reduction process (GO:0055114), Molecular Function: ferredoxin-NAD(P) reductase activity (GO:0008937)
Os11g0448000	0.921051	1.48687e-05			Protein kinase, catalytic domain domain containing protein.	Biological Process: protein phosphorylation (GO:0006468), Molecular Function: protein kinase activity (GO:0004672), Molecular Function: protein serine/threonine kinase activity (GO:0004674), Molecular Function: protein tyrosine kinase activity (GO:0004713), Molecular Function: protein binding (GO:0005515), Molecular Function: ATP binding (GO:0005524), Molecular Function: transferase activity, tra…
Os08g0530500	0.920642	3.17312e-05			Conserved hypothetical protein.	0
Os06g0272700	0.920044	0.00556592	OsTBL64, TBL64	0	Protein of unknown function DUF231, plant domain containing protein.	0
Os06g0114000	0.920038	1.02391e-06	OsCPn60beta1, OsCPn60b1	0	Hypothetical gene.	0
Os01g0862200	0.918388	0.00360901			Conserved hypothetical protein.	0
Os06g0535400	0.91808	0.000287174			Similar to E3 ubiquitin ligase EL5 (EC 6.3.2.-).	Molecular Function: protein binding (GO:0005515), Molecular Function: zinc ion binding (GO:0008270)
Os09g0434900	0.91774	0.00227898			Zinc finger, RING-type domain containing protein.	Molecular Function: protein binding (GO:0005515), Molecular Function: zinc ion binding (GO:0008270)
Os08g0152400	0.917572	0.000190996			Similar to P450.	Biological Process: oxidation-reduction process (GO:0055114), Molecular Function: iron ion binding (GO:0005506), Molecular Function: electron carrier activity (GO:0009055), Molecular Function: oxidoreductase activity, acting on paired donors, with incorporation or reduction of molecular oxygen (GO:0016705), Molecular Function: heme binding (GO:0020037)
Os01g0900800	0.917249	3.62655e-13	OsbHLH109	0	Helix-loop-helix DNA-binding domain containing protein.	0
Os11g0707900	0.917193	0.00753827			Protein of unknown function DUF740 family protein.	0
Os12g0106700	0.917182	2.79657e-08			Conserved hypothetical protein.	0
Os03g0673600	0.916858	0.00368375	OsSTA109	0	Conserved hypothetical protein.	0
Os11g0474100	0.915925	2.24304e-05			Conserved hypothetical protein.	0
Os02g0100800	0.915769	0.00616324			Conserved hypothetical protein.	0
Os01g0861700	0.915443	0.00197824	OsHORZ1	0	Hypothetical conserved gene.	0
Os03g0237100	0.91516	0.00351474	OsDMAS1	DEOXYMUGINEIC ACID SYNTHASE 1	Similar to NADPH-dependent codeinone reductase (EC 1.1.1.247).	Biological Process: oxidation-reduction process (GO:0055114), Molecular Function: oxidoreductase activity (GO:0016491)
Os05g0429100	0.91489	1.80535e-06			Hypothetical protein.	0
Os10g0406300	0.914101	7.82118e-06	OsDof26, Dof26, OsDof-26	0	Similar to AOBP (Ascorbate oxidase promoter-binding protein).	Biological Process: regulation of transcription, DNA-dependent (GO:0006355), Molecular Function: DNA binding (GO:0003677), Molecular Function: zinc ion binding (GO:0008270)
Os02g0695700	0.913488	0.00545303			Conserved hypothetical protein.	0
Os11g0521500	0.913318	0.000631096			Similar to Acyl carrier protein, chloroplast precursor (ACP) (ACP05) (Clone 29C08).	Biological Process: fatty acid biosynthetic process (GO:0006633), Molecular Function: acyl carrier activity (GO:0000036), Molecular Function: phosphopantetheine binding (GO:0031177), Molecular Function: cofactor binding (GO:0048037)
Os03g0113500	0.913277	0.00581129			Conserved hypothetical protein.	0
Os01g0839700	0.913186	6.63544e-08	OsUBC11	UBIQUITIN-CONJUGATING ENZYME 11	Similar to Ubiquitin carrier protein.	Molecular Function: acid-amino acid ligase activity (GO:0016881)
Os02g0726600	0.910572	2.71624e-13			Similar to tic20 protein-related.	0
Os10g0118800	0.910303	0.000474971			Hypothetical conserved gene.	Cellular Component: integral to membrane (GO:0016021)
Os05g0429500	0.910264	4.43431e-07			Similar to dienelactone hydrolase family protein.	0
Os06g0699200	0.910106	4.49543e-09			Metallophosphoesterase domain containing protein.	Molecular Function: hydrolase activity (GO:0016787)
Os03g0850600	0.907872	6.98114e-09			Similar to Integral membrane protein.	0
Os03g0195450	0.907836	8.26301e-05			Similar to sulfate/bicarbonate/oxalate exchanger and transporter sat-1.	0
Os08g0451200	0.907565	6.15113e-09			Protein of unknown function DUF581 family protein.	0
Os07g0111700	0.90717	0.00144695			Flavin monooxygenase FMO domain containing protein.	Biological Process: oxidation-reduction process (GO:0055114), Molecular Function: flavin-containing monooxygenase activity (GO:0004499), Molecular Function: flavin adenine dinucleotide binding (GO:0050660), Molecular Function: NADP binding (GO:0050661)
Os03g0305100	0.906965	3.03311e-08			Similar to AMP-binding protein.	Biological Process: metabolic process (GO:0008152), Molecular Function: catalytic activity (GO:0003824)
Os11g0242800	0.906544	0.00302941	ASCAB9-A, CP26, Lhcb5	0	Similar to ASCAB9-A (ASCAB9-B) (Fragment).	Biological Process: photosynthesis, light harvesting (GO:0009765), Cellular Component: membrane (GO:0016020)
Os08g0548700	0.906519	1.52078e-05			Hypothetical conserved gene.	0
Os06g0332800	0.906144	3.12985e-05			Similar to Bundle sheath defective protein 2.	Molecular Function: heat shock protein binding (GO:0031072), Molecular Function: unfolded protein binding (GO:0051082)
Os03g0104100	0.905915	1.25241e-08			Protein phosphatase 2C, N-terminal domain containing protein.	Molecular Function: catalytic activity (GO:0003824)
Os01g0221900	0.905812	7.98194e-05			Similar to peptidase C45, acyl-coenzyme A/6-aminopenicillanic acid acyl-transferase.	0
Os03g0757200	0.905114	0.00489956			UDP-glucuronosyl/UDP-glucosyltransferase family protein.	Biological Process: metabolic process (GO:0008152), Molecular Function: transferase activity, transferring hexosyl groups (GO:0016758)
Os10g0375700	0.904959	1.66029e-06			Alpha/beta hydrolase fold-1 domain containing protein.	0
Os05g0586050	0.904296	0.00134129			Protein of unknown function DUF247, plant domain containing protein.	0
Os02g0759400	0.903805	0.00658917			Zinc finger, RING/FYVE/PHD-type domain containing protein.	Molecular Function: protein binding (GO:0005515), Molecular Function: zinc ion binding (GO:0008270)
Os09g0123500	0.903679	6.19318e-07			Tetratricopeptide-like helical domain containing protein.	Molecular Function: binding (GO:0005488), Molecular Function: protein binding (GO:0005515)
Os01g0763300	0.903531	8.49063e-06			Conserved hypothetical protein.	0
Os03g0298600	0.903436	1.93719e-05			Sel1-like domain containing protein.	Molecular Function: binding (GO:0005488)
Os01g0755700	0.903424	2.53766e-05			Zinc finger, RING/FYVE/PHD-type domain containing protein.	Molecular Function: protein binding (GO:0005515), Molecular Function: zinc ion binding (GO:0008270)
Os01g0107400	0.90222	1.80035e-05			Conserved hypothetical protein.	0
Os09g0539901	0.900961	0.00116175			Hypothetical gene.	0
Os02g0125700	0.900617	5.80359e-08			Similar to lil3 protein.	0
Os07g0631900	0.900234	7.49404e-11			Nucleotide-binding, alpha-beta plait domain containing protein.	Molecular Function: nucleotide binding (GO:0000166), Molecular Function: nucleic acid binding (GO:0003676)
Os12g0124200	0.899009	2.64523e-07			Similar to 40S ribosomal protein S16.	Biological Process: translation (GO:0006412), Cellular Component: intracellular (GO:0005622), Cellular Component: ribosome (GO:0005840), Molecular Function: structural constituent of ribosome (GO:0003735)
Os08g0440100	0.898996	1.70309e-08			Similar to Temperature stress-induced lipocalin.	Biological Process: transport (GO:0006810), Molecular Function: transporter activity (GO:0005215), Molecular Function: binding (GO:0005488)
Os06g0110000	0.898856	0.000458614	OsKAO, kao, CYP88A5, OSKAO, Os KAO, RPE1	ENT-KAURENE OXIDASE	Similar to DWARF3 (Fragment).	Biological Process: oxidation-reduction process (GO:0055114), Molecular Function: monooxygenase activity (GO:0004497), Molecular Function: iron ion binding (GO:0005506), Molecular Function: electron carrier activity (GO:0009055), Molecular Function: oxidoreductase activity, acting on paired donors, with incorporation or reduction of molecular oxygen (GO:0016705), Molecular Function: heme binding …
Os03g0843400	0.89857	0.000442112			Similar to 30S ribosomal protein S6, chloroplast precursor (Fragment).	Biological Process: translation (GO:0006412), Cellular Component: ribosome (GO:0005840), Molecular Function: structural constituent of ribosome (GO:0003735), Molecular Function: rRNA binding (GO:0019843)
Os12g0231000	0.898509	0.00308495	OsPTR3, PTR3-A	0	TGF-beta receptor, type I/II extracellular region family protein.	Biological Process: oligopeptide transport (GO:0006857), Cellular Component: membrane (GO:0016020), Molecular Function: transporter activity (GO:0005215)
Os06g0505501	0.898319	0.00872625			Non-protein coding transcript.	0
Os10g0163250	0.897896	0.000246663			Hypothetical conserved gene.	0
Os07g0570700	0.897602	0.000227475			Ribosome recycling factor family protein.	Biological Process: translation (GO:0006412)
Os03g0748300	0.897425	3.71981e-05			Aldose 1-epimerase family protein.	Biological Process: carbohydrate metabolic process (GO:0005975), Molecular Function: catalytic activity (GO:0003824), Molecular Function: carbohydrate binding (GO:0030246)
Os01g0566100	0.896528	1.01071e-09			Conserved hypothetical protein.	0
Os08g0263300	0.895759	3.89453e-09			Similar to cDNA clone:J013108L16, full insert sequence.	0
Os02g0532900	0.895742	8.53377e-05			Glycoside hydrolase, family 17 protein.	Biological Process: carbohydrate metabolic process (GO:0005975), Molecular Function: catalytic activity (GO:0003824), Molecular Function: hydrolase activity, hydrolyzing O-glycosyl compounds (GO:0004553), Molecular Function: cation binding (GO:0043169)
Os04g0570800	0.895682	1.80964e-05			Protein of unknown function DUF248, methyltransferase putative family protein.	Molecular Function: methyltransferase activity (GO:0008168)
Os02g0596000	0.895245	9.52584e-05	OsStr1	SULFURTRANSFERASE 1	Rhodanese-like domain containing protein.	0
Os07g0542400	0.894284	0.00202824			Similar to Receptor protein kinase.	Biological Process: protein phosphorylation (GO:0006468), Molecular Function: protein kinase activity (GO:0004672), Molecular Function: protein serine/threonine kinase activity (GO:0004674), Molecular Function: ATP binding (GO:0005524), Molecular Function: transferase activity, transferring phosphorus-containing groups (GO:0016772)
Os03g0118450	0.893553	0.00325304			Non-protein coding transcript.	0
Os01g0103400	0.893455	0.00691834			Hypothetical gene.	0
Os05g0528000	0.89302	0.000689675	rbohC, OsrbohC, Os rbohC, OsRbohC, OsNox5, OsrbohD, OsRboh5	RESPIRATORY BURST OXIDASE HOMOLOG C	Similar to RbohAOsp (Fragment).	Biological Process: oxidation-reduction process (GO:0055114), Cellular Component: membrane (GO:0016020), Cellular Component: integral to membrane (GO:0016021), Molecular Function: peroxidase activity (GO:0004601), Molecular Function: iron ion binding (GO:0005506), Molecular Function: calcium ion binding (GO:0005509), Molecular Function: electron carrier activity (GO:0009055), Molecular Function: …
Os07g0668200	0.892509	0.00448044			Similar to adenyl cyclase.	0
Os05g0190000	0.892047	0.00191381			Hypothetical gene.	0
Os01g0871900	0.89193	9.90093e-05			Similar to POT family protein.	Biological Process: oligopeptide transport (GO:0006857), Cellular Component: membrane (GO:0016020), Molecular Function: transporter activity (GO:0005215)
Os08g0532300	0.891897	1.5585e-06			Similar to Nuclear transport factor 2 (NTF-2) (Allergen Cla h ?).	Biological Process: transport (GO:0006810), Cellular Component: intracellular (GO:0005622)
Os06g0101100	0.891705	0.00187348			Nicotinamide N-methyltransferase, putative domain containing protein.	0
Os08g0561700	0.891612	3.13664e-05	OsSOD4, OsCSD4, OsCu/Zn-SOD1, Cu/Zn-SOD1, OsCSD2, CSD2	SUPEROXIDE DISMUTASE 4	Similar to Superoxide dismutase.	Biological Process: superoxide metabolic process (GO:0006801), Biological Process: oxidation-reduction process (GO:0055114), Molecular Function: superoxide dismutase activity (GO:0004784), Molecular Function: metal ion binding (GO:0046872)
Os08g0318400	0.891605	1.14845e-07	Cen8.t01152	0	Conserved hypothetical protein.	0
Os04g0614100	0.891549	0.000661694	OsMADS31	MADS-BOX TRANSCRIPTION FACTOR 31	Transcription factor, MADS-box domain containing protein.	Biological Process: regulation of transcription, DNA-dependent (GO:0006355), Cellular Component: nucleus (GO:0005634), Molecular Function: DNA binding (GO:0003677), Molecular Function: sequence-specific DNA binding transcription factor activity (GO:0003700), Molecular Function: protein dimerization activity (GO:0046983)
Os01g0913000	0.889552	1.1257e-07	OsTRXh10, OsTRX2	THIOREDOXIN H-TYPE 10	Similar to Thioredoxin F-type 2, chloroplast precursor (TRX-F2).	Biological Process: glycerol ether metabolic process (GO:0006662), Biological Process: cell redox homeostasis (GO:0045454), Molecular Function: electron carrier activity (GO:0009055), Molecular Function: protein disulfide oxidoreductase activity (GO:0015035)
Os08g0445700	0.888055	1.09191e-05	OsTPS8, OsTPS1	TREHALOSE-6-PHOSPHATE SYNTHASE 8	HAD-superfamily hydrolase subfamily IIB protein.	Biological Process: trehalose biosynthetic process (GO:0005992), Biological Process: metabolic process (GO:0008152), Molecular Function: catalytic activity (GO:0003824)
Os03g0221700	0.886823	1.3556e-06			Serine/threonine protein kinase-related domain containing protein.	Biological Process: protein phosphorylation (GO:0006468), Biological Process: recognition of pollen (GO:0048544), Molecular Function: protein kinase activity (GO:0004672), Molecular Function: protein serine/threonine kinase activity (GO:0004674), Molecular Function: protein tyrosine kinase activity (GO:0004713), Molecular Function: protein binding (GO:0005515), Molecular Function: ATP binding (GO…
Os04g0270200	0.886115	5.82338e-07			Uncharacterised protein family UPF0172 domain containing protein.	0
Os04g0355401	0.885387	5.93667e-12			Hypothetical protein.	0
Os03g0324300	0.884906	3.61829e-10			Similar to ETHYLENE-INSENSITIVE3-like 1 protein.	Cellular Component: nucleus (GO:0005634), Molecular Function: sequence-specific DNA binding transcription factor activity (GO:0003700)
Os03g0772800	0.884721	1.5718e-07			Cytochrome c oxidase, subunit VIa family protein.	Cellular Component: mitochondrial inner membrane (GO:0005743), Cellular Component: mitochondrial respiratory chain complex IV (GO:0005751), Molecular Function: cytochrome-c oxidase activity (GO:0004129)
Os06g0226700	0.88447	0.00117472	OsTCP19, TCP19	0	Similar to PCF1.	0
Os01g0667100	0.884358	8.18311e-08			Similar to 60S ribosomal protein L18A.	Biological Process: translation (GO:0006412), Cellular Component: ribosome (GO:0005840), Molecular Function: structural constituent of ribosome (GO:0003735)
Os04g0545100	0.883027	0.000227542	OsSTA128	0	Engulfment and cell motility, ELM domain containing protein.	Biological Process: phagocytosis (GO:0006909), Cellular Component: cytoskeleton (GO:0005856)
Os05g0571400	0.882403	1.98647e-09			Protein of unknown function DUF3593 domain containing protein.	0
Os01g0675700	0.882185	3.08539e-11	OsIAA5	0	Similar to Auxin-responsive protein IAA14 (Indoleacetic acid-induced protein 14) (SOLITARY-ROOT protein).	Biological Process: regulation of transcription, DNA-dependent (GO:0006355), Cellular Component: nucleus (GO:0005634), Molecular Function: protein dimerization activity (GO:0046983)
Os01g0782200	0.882083	3.28456e-07			Diacylglycerol kinase, catalytic region domain containing protein.	Biological Process: activation of protein kinase C activity by G-protein coupled receptor protein signaling pathway (GO:0007205), Molecular Function: diacylglycerol kinase activity (GO:0004143)
Os02g0751600	0.882034	3.1538e-05	OsFKBP16-2	_	Peptidyl-prolyl cis-trans isomerase, FKBP-type domain containing protein.	Biological Process: protein folding (GO:0006457)
Os04g0676400	0.881904	0.00544663			Similar to H0101F08.4 protein.	0
Os09g0563901	0.881564	0.00988644			Hypothetical genes.	0
Os03g0138900	0.881206	0.00329035			Conserved hypothetical protein.	0
Os12g0547600	0.880711	0.00287377	CaMBP	0	Calmodulin binding protein-like domain containing protein.	0
Os10g0479500	0.880472	4.63516e-09	LOGL10	LONELY GUY LIKE PHOSPHORIBOHYDROLASE 10	Similar to carboxy-lyase.	0
Os02g0823000	0.879759	1.2652e-08			Peptidase A22B, signal peptide peptidase domain containing protein.	Cellular Component: integral to membrane (GO:0016021), Molecular Function: aspartic-type endopeptidase activity (GO:0004190)
Os01g0749200	0.87953	0.000879609	cp rpl13, cp RPL13, WLP1, RPL13	0	Chloroplast ribosome L13 protein, Chloroplast development under low temperature conditions	Biological Process: translation (GO:0006412), Molecular Function: structural constituent of ribosome (GO:0003735), Cellular Component: ribosome (GO:0005840)
Os10g0503800	0.87945	2.54971e-07			Similar to Remorin.	0
Os06g0656500	0.879108	5.43355e-12	Os4CL4	4-COUMARATE:COENZYME A LIGASE 4	4-coumarate:coenzyme A ligase, Lignin biosynthesis, Defense against wounding	Biological Process: metabolic process (GO:0008152), Molecular Function: catalytic activity (GO:0003824)
Os05g0101600	0.879087	0.000107064			Cytochrome P450 family protein.	Biological Process: oxidation-reduction process (GO:0055114), Molecular Function: iron ion binding (GO:0005506), Molecular Function: electron carrier activity (GO:0009055), Molecular Function: oxidoreductase activity, acting on paired donors, with incorporation or reduction of molecular oxygen (GO:0016705), Molecular Function: heme binding (GO:0020037)
Os02g0727966	0.878677	0.00236141			Conserved hypothetical protein.	0
Os02g0779200	0.878426	6.03032e-07	OsSub22, SUB22, OsSASP, SASP	0	Similar to Subtilisin-like protease (Fragment).	Biological Process: proteolysis (GO:0006508), Biological Process: negative regulation of catalytic activity (GO:0043086), Molecular Function: serine-type endopeptidase activity (GO:0004252), Molecular Function: identical protein binding (GO:0042802)
Os10g0207400	0.878356	3.40869e-05			Conserved hypothetical protein.	0
Os02g0189000	0.877421	3.84226e-05			Similar to Chloroplast 30S ribosomal protein S21 (Fragment).	Biological Process: translation (GO:0006412), Cellular Component: intracellular (GO:0005622), Cellular Component: ribosome (GO:0005840), Molecular Function: structural constituent of ribosome (GO:0003735)
Os09g0113000	0.877379	6.54295e-08	0	0	Conserved hypothetical protein.	0
Os04g0405100	0.876323	1.99449e-05			Similar to H0502B11.8 protein.	Molecular Function: protein binding (GO:0005515)
Os05g0108000	0.876298	2.8009e-06			tRNA pseudouridine synthase B family protein.	Biological Process: pseudouridine synthesis (GO:0001522), Biological Process: RNA processing (GO:0006396), Biological Process: RNA modification (GO:0009451), Molecular Function: RNA binding (GO:0003723), Molecular Function: pseudouridine synthase activity (GO:0009982)
Os07g0185200	0.875865	2.3713e-09			Similar to Membrane related protein-like.	0
Os03g0425000	0.875652	0.000717493			Similar to predicted protein.	0
Os08g0130400	0.875568	0.000541005			AMP-dependent synthetase/ligase domain containing protein.	Biological Process: metabolic process (GO:0008152), Molecular Function: catalytic activity (GO:0003824)
Os11g0481500	0.874465	0.00026428			Conserved hypothetical protein.	0
Os03g0579000	0.874301	2.06951e-09			Peptidase M50 domain containing protein.	Biological Process: proteolysis (GO:0006508), Molecular Function: metalloendopeptidase activity (GO:0004222), Molecular Function: protein binding (GO:0005515)
Os12g0275400	0.874248	5.34341e-05			Hypothetical conserved gene.	0
Os07g0606600	0.874159	0.000573621	OsHAP3F, NF-YB, CBF-A, NF-YB10, OsNF-YB10, NFYB10	HAP3F SUBUNIT OF CCAAT-BOX BINDING COMPLEX	Similar to Nuclear factor Y transcription factor subunit B homolog.	Biological Process: regulation of transcription, DNA-dependent (GO:0006355), Cellular Component: intracellular (GO:0005622), Cellular Component: nucleus (GO:0005634), Molecular Function: DNA binding (GO:0003677), Molecular Function: sequence-specific DNA binding (GO:0043565)
Os08g0235550	0.873148	0.000348358			Conserved hypothetical protein.	0
Os01g0813100	0.872455	6.7297e-05	OsbZIP09, OsbZIP9, OsABF6, ABF6, HBF2	b-ZIP TRANSCRIPTION FACTOR 9	bZIP transcription factor, Modulation of the floral transition, Floral repressor	Biological Process: regulation of transcription, DNA-templated (GO:0006355), Molecular Function: transcription factor activity, sequence-specific DNA binding (GO:0003700)
Os03g0247900	0.871433	5.03842e-05	OsACR9	ACT DOMAIN REPEAT PROTEIN 9	F5O11.14 (ACR8).	Biological Process: metabolic process (GO:0008152), Molecular Function: amino acid binding (GO:0016597)
Os11g0263000	0.871286	0.00257388			Similar to Leucine Rich Repeat family protein, expressed.	0
Os02g0606200	0.870493	4.93019e-07	OsBBX4, OsSTH	0	Zinc finger, B-box domain containing protein.	Cellular Component: intracellular (GO:0005622), Molecular Function: zinc ion binding (GO:0008270)
Os01g0222500	0.868322	0.00856301			Similar to Vacuolar ATP synthase subunit E (EC 3.6.3.14) (V-ATPase E subunit) (Vacuolar proton pump E subunit).	Biological Process: ATP hydrolysis coupled proton transport (GO:0015991), Cellular Component: proton-transporting two-sector ATPase complex, catalytic domain (GO:0033178), Molecular Function: proton-transporting ATPase activity, rotational mechanism (GO:0046961)
Os02g0212900	0.86814	0.000517079	OsRLCK66	RECEPTOR-LIKE CYTOPLASMIC KINASE 66	Similar to Protein kinase domain containing protein, expressed.	Biological Process: protein phosphorylation (GO:0006468), Molecular Function: protein kinase activity (GO:0004672), Molecular Function: ATP binding (GO:0005524), Molecular Function: transferase activity, transferring phosphorus-containing groups (GO:0016772)
Os12g0485300	0.866981	0.000641689			Non-protein coding transcript.	0
Os03g0563300	0.86567	0.000284516	chlI, OsChlI, ChlI, CHLI	0	Similar to Mg-chelatase subunit (Fragment).	Biological Process: porphyrin-containing compound biosynthetic process (GO:0006779), Biological Process: photosynthesis (GO:0015979), Biological Process: chlorophyll biosynthetic process (GO:0015995), Molecular Function: nucleotide binding (GO:0000166), Molecular Function: ATP binding (GO:0005524), Molecular Function: magnesium chelatase activity (GO:0016851), Molecular Function: nucleoside-triph…
Os07g0251200	0.864347	0.00150078			Conserved hypothetical protein.	0
Os01g0719100	0.862777	1.40615e-07	OsRZFP34, OsRFP1	0	Similar to RING finger and CHY zinc finger domain-containing protein 1.	Molecular Function: zinc ion binding (GO:0008270)
Os04g0534801	0.861786	0.00861793			Conserved hypothetical protein.	0
Os11g0465200	0.86177	2.31808e-05			Similar to Bx2-like protein.	Biological Process: oxidation-reduction process (GO:0055114), Molecular Function: iron ion binding (GO:0005506), Molecular Function: electron carrier activity (GO:0009055), Molecular Function: oxidoreductase activity, acting on paired donors, with incorporation or reduction of molecular oxygen (GO:0016705), Molecular Function: heme binding (GO:0020037)
Os12g0115950	0.861632	0.00792759			Conserved hypothetical protein.	0
Os06g0479200	0.860397	2.09525e-13			Conserved hypothetical protein.	0
Os11g0111101	0.860068	0.00790632			Similar to cDNA clone:J033057N11, full insert sequence.	0
Os05g0128100	0.859147	3.89453e-09			Hypothetical conserved gene.	0
Os04g0459500	0.858291	0.00107269			Similar to H0219H12.1 protein.	Biological Process: oxidation-reduction process (GO:0055114), Molecular Function: oxidoreductase activity, acting on the aldehyde or oxo group of donors, NAD or NADP as acceptor (GO:0016620)
Os01g0703600	0.858258	0.00334251	0	CLATHRIN-ASSOCIATED ADAPTOR PROTEIN COMPLEX 1	Clathrin-associated adaptor protein complex 1 medium subunit mu1 (AP1M1), Regulation of vesicular trafficking, Disease resistance	Biological Process: transport (GO:0006810), Biological Process: intracellular protein transport (GO:0006886), Biological Process: vesicle-mediated transport (GO:0016192), Cellular Component: clathrin adaptor complex (GO:0030131), Molecular Function: protein binding (GO:0005515)
Os03g0800100	0.857651	0.00667182			Cactin, domain domain containing protein.	0
Os07g0191650	0.857242	4.76031e-05			Similar to F-box domain containing protein, expressed.	0
Os06g0143700	0.856735	0.00055914	OsSultr3;4, OsSul3;4, OsaSULTR3;4, SPDT	_	Similar to Sulfate transporter 2.	Biological Process: transport (GO:0006810), Biological Process: sulfate transport (GO:0008272), Biological Process: transmembrane transport (GO:0055085), Cellular Component: membrane (GO:0016020), Cellular Component: integral to membrane (GO:0016021), Molecular Function: transporter activity (GO:0005215), Molecular Function: secondary active sulfate transmembrane transporter activity (GO:0008271)
Os07g0189800	0.856405	1.083e-08			Similar to JHL07K02.7 protein.	0
Os02g0639900	0.856377	8.88179e-08			Similar to Thioredoxin M-type, chloroplast precursor (TRX-M).	Biological Process: glycerol ether metabolic process (GO:0006662), Biological Process: cell redox homeostasis (GO:0045454), Molecular Function: electron carrier activity (GO:0009055), Molecular Function: protein disulfide oxidoreductase activity (GO:0015035)
Os01g0144100	0.856087	0.00356713			Similar to Thylakoid lumenal 15 kDa protein, chloroplast precursor (p15).	0
Os01g0922600	0.85598	1.51441e-05	OsSPL2	RICE SQUAMOSA PROMOTER-BINDING-LIKE PROTEIN 2	Similar to SBP-domain protein 4.	Cellular Component: nucleus (GO:0005634), Molecular Function: DNA binding (GO:0003677)
Os07g0185300	0.855775	2.90129e-08			Protein of unknown function YGGT family protein.	Cellular Component: membrane (GO:0016020)
Os08g0231100	0.855718	8.84311e-12			Hypothetical protein.	0
Os02g0103800	0.855423	2.07541e-06	OsLFNR1, LFNR1, LFNR2, Os-LFNR2, OsLFNR2	0	Leaf-type ferredoxin-NADP+-oxidoreductase, Regulation of electron partitioning in the chloroplast	Biological Process: oxidation-reduction process (GO:0055114), Molecular Function: oxidoreductase activity (GO:0016491)
Os03g0190100	0.855232	1.71762e-06	OsPPT1, PPT1	0	UbiA prenyltransferase family protein.	Cellular Component: integral to membrane (GO:0016021), Molecular Function: prenyltransferase activity (GO:0004659)
Os12g0292400	0.855065	0.000975788	RbcS, RbcS4, OsRBCS4, OsRbcS4	0	Similar to Petunia ribulose 1, 5-bisphosphate carboxylase small subunit mRNA (clone pSSU 51), partial cds. (Fragment).	0
Os02g0572400	0.854437	1.63049e-09			Similar to Riboflavin biosynthesis protein ribA, chloroplast precursor [Includes: GTP cyclohydrolase II (EC 3.5.4.25); 3, 4-dihydroxy-2-butanone 4- phosphate synthase (DHBP synthase)].	Biological Process: riboflavin biosynthetic process (GO:0009231), Molecular Function: GTP cyclohydrolase II activity (GO:0003935), Molecular Function: 3, 4-dihydroxy-2-butanone-4-phosphate synthase activity (GO:0008686)
Os04g0380300	0.853747	3.30303e-06	OsFbox203, Os_F0600	0	Kelch-type beta propeller domain containing protein.	Molecular Function: protein binding (GO:0005515)
Os05g0579600	0.85102	1.45136e-07			Homeodomain-like containing protein.	Molecular Function: DNA binding (GO:0003677), Molecular Function: protein binding (GO:0005515)
Os02g0435200	0.850955	4.13144e-06			Hypothetical conserved gene.	0
Os04g0517400	0.850267	7.3794e-05			Similar to Plant glycogenin-like starch initiation protein (Fragment).	0
Os02g0552550	0.849386	3.61631e-06			Hypothetical gene.	0
Os02g0185300	0.848038	0.000193978			Cytochrome P450 family protein.	Biological Process: oxidation-reduction process (GO:0055114), Molecular Function: iron ion binding (GO:0005506), Molecular Function: electron carrier activity (GO:0009055), Molecular Function: oxidoreductase activity, acting on paired donors, with incorporation or reduction of molecular oxygen (GO:0016705), Molecular Function: heme binding (GO:0020037)
Os02g0804400	0.847675	4.81638e-05			Conserved hypothetical protein.	0
Os05g0500200	0.847288	0.0001007			Similar to UDP glucosyltransferase-1.	Biological Process: metabolic process (GO:0008152), Molecular Function: transferase activity, transferring hexosyl groups (GO:0016758)
Os08g0476300	0.845898	0.00112813			Glucose/ribitol dehydrogenase family protein.	Biological Process: metabolic process (GO:0008152), Molecular Function: nucleotide binding (GO:0000166), Molecular Function: oxidoreductase activity (GO:0016491)
Os01g0848900	0.845332	1.849e-06			Conserved hypothetical protein.	0
Os01g0784800	0.845318	0.00110398			Flavodoxin/nitric oxide synthase domain containing protein.	Biological Process: negative regulation of transcription, DNA-dependent (GO:0045892), Molecular Function: FMN binding (GO:0010181), Molecular Function: oxidoreductase activity (GO:0016491)
Os03g0251700	0.845035	0.0001285			Similar to Protein kinase domain containing protein, expressed.	Biological Process: protein phosphorylation (GO:0006468), Molecular Function: protein kinase activity (GO:0004672), Molecular Function: protein serine/threonine kinase activity (GO:0004674), Molecular Function: protein tyrosine kinase activity (GO:0004713), Molecular Function: ATP binding (GO:0005524), Molecular Function: transferase activity, transferring phosphorus-containing groups (GO:0016772)
Os10g0392400	0.844242	0.00304308	OsTIFY11d, OsJAZ1, JAZ1, OsJAZ 12, OsJAZ12, JAZ12	TIFY DOMAIN PROTEIN 11d	Tify domain containing protein.	Molecular Function: protein binding (GO:0005515)
Os08g0484700	0.843809	3.09777e-06			Homeodomain-like containing protein.	0
Os04g0405000	0.843619	9.59673e-07	ClpD2, OsClpD2	CLASS I CLP ATPASE D2	Similar to ATP-dependent Clp protease ATP-binding subunit.	0
Os07g0236200	0.843446	2.45513e-08			Hypothetical conserved gene.	0
Os07g0622200	0.843405	8.83226e-08	OsDAHP1, DAHP1, DAHPS, OsDAHPS2, DAHPS2	0	3-Deoxy-D-arabino-heptulosonate 7-phosphate synthase, Chorismate biosynthesis	Biological Process: aromatic amino acid family biosynthetic process (GO:0009073), Molecular Function: 3-deoxy-7-phosphoheptulonate synthase activity (GO:0003849)
Os04g0476100	0.843319	0.000142268			Similar to Peroxisomal copper-containing amine oxidase.	Biological Process: amine metabolic process (GO:0009308), Biological Process: oxidation-reduction process (GO:0055114), Molecular Function: copper ion binding (GO:0005507), Molecular Function: primary amine oxidase activity (GO:0008131), Molecular Function: quinone binding (GO:0048038)
Os07g0229800	0.843165	8.6687e-07			Similar to GLY1; glycerol-3-phosphate dehydrogenase (NAD+).	Biological Process: glycerol-3-phosphate metabolic process (GO:0006072), Biological Process: glycerol-3-phosphate catabolic process (GO:0046168), Biological Process: oxidation-reduction process (GO:0055114), Cellular Component: cytoplasm (GO:0005737), Cellular Component: glycerol-3-phosphate dehydrogenase complex (GO:0009331), Molecular Function: nucleotide binding (GO:0000166), Molecular Functio…
Os02g0769800	0.843103	1.47924e-07			Similar to Mitogen-activated protein kinase kinase kinase 1 (EC 2.7.1.-) (Arabidospsis NPK1-related protein kinase 1). Splice isoform 1S.	Biological Process: protein phosphorylation (GO:0006468), Molecular Function: protein kinase activity (GO:0004672), Molecular Function: ATP binding (GO:0005524), Molecular Function: transferase activity, transferring phosphorus-containing groups (GO:0016772)
Os05g0110100	0.842775	0.000533617			Heat shock protein DnaJ, cysteine-rich domain domain containing protein.	Molecular Function: heat shock protein binding (GO:0031072), Molecular Function: unfolded protein binding (GO:0051082)
Os03g0781400	0.842441	6.13806e-05			Ribose 5-phosphate isomerase family protein.	Biological Process: pentose-phosphate shunt, non-oxidative branch (GO:0009052), Molecular Function: ribose-5-phosphate isomerase activity (GO:0004751)
Os03g0169800	0.842381	4.4284e-08			HNH endonuclease domain containing protein.	Molecular Function: nucleic acid binding (GO:0003676), Molecular Function: endonuclease activity (GO:0004519)
Os02g0608600	0.841536	0.00107033			Amino acid-binding ACT domain containing protein.	Biological Process: metabolic process (GO:0008152), Biological Process: branched chain family amino acid biosynthetic process (GO:0009082), Molecular Function: acetolactate synthase activity (GO:0003984), Molecular Function: amino acid binding (GO:0016597)
Os10g0499600	0.841084	0.00405176			Similar to predicted protein.	0
Os04g0602100	0.840036	0.000578243			Plant ascorbate peroxidase domain containing protein.	Biological Process: response to oxidative stress (GO:0006979), Biological Process: oxidation-reduction process (GO:0055114), Molecular Function: peroxidase activity (GO:0004601), Molecular Function: heme binding (GO:0020037)
Os05g0318300	0.840035	8.92202e-08			Ribonuclease III domain containing protein.	Biological Process: RNA processing (GO:0006396), Molecular Function: RNA binding (GO:0003723), Molecular Function: ribonuclease III activity (GO:0004525)
Os01g0833200	0.839769	1.34939e-08			Similar to expressed protein.	Molecular Function: ureidoglycolate hydrolase activity (GO:0004848)
Os03g0559900	0.839502	0.000319061			Conserved hypothetical protein.	0
Os08g0520700	0.839396	7.25751e-05			Hypothetical protein.	0
Os10g0554100	0.838883	0.000145254			Similar to Oxysterol-binding protein.	0
Os12g0276100	0.838727	3.74134e-06			Conserved hypothetical protein.	0
Os01g0797600	0.838317	0.000513708	AP37, OsAP37, OsERF3, OsERF#075, OsERF075, OsERF75, ERF75, AP2/EREBP#004, AP2/EREBP4, OsBIERF2, BIERF2	ETHYLENE-RESPONSIVE ELEMENT-BINDING FACTOR 3	AP2/ERF family protein, ERF-associated EAR-motif-containing repressor, Abiotic stress response, Stress signaling	Biological Process: regulation of transcription, DNA-dependent (GO:0006355), Molecular Function: DNA binding (GO:0003677), Molecular Function: sequence-specific DNA binding transcription factor activity (GO:0003700)
Os08g0159500	0.837659	0.00184744			Similar to Zinc-finger protein Lsd1.	0
Os04g0429900	0.837526	0.00198637			Conserved hypothetical protein.	0
Os07g0597100	0.837373	0.00011468			Similar to Saccharopine dehydrogenase.	0
Os05g0551801	0.83717	5.09244e-07			Hypothetical gene.	0
Os03g0196800	0.83711	1.00969e-06			Similar to Cyanelle 30S ribosomal protein S10.	Biological Process: translation (GO:0006412), Cellular Component: intracellular (GO:0005622), Cellular Component: ribosome (GO:0005840), Cellular Component: small ribosomal subunit (GO:0015935), Molecular Function: RNA binding (GO:0003723), Molecular Function: structural constituent of ribosome (GO:0003735)
Os03g0122200	0.836681	0.00170026			Similar to 50S ribosomal protein L11.	Biological Process: translation (GO:0006412), Cellular Component: ribosome (GO:0005840), Molecular Function: structural constituent of ribosome (GO:0003735)
Os09g0422000	0.836374	5.84358e-08	HCT3	0	Transferase family protein.	Molecular Function: transferase activity, transferring acyl groups other than amino-acyl groups (GO:0016747)
Os12g0458900	0.836126	0.002732			Conserved hypothetical protein.	0
Os05g0513350	0.835219	0.000179602			Similar to predicted protein.	0
Os03g0356400	0.835151	0.000233363	OsGRL6	0	Thioredoxin fold domain containing protein.	Biological Process: cell redox homeostasis (GO:0045454), Molecular Function: electron carrier activity (GO:0009055), Molecular Function: protein disulfide oxidoreductase activity (GO:0015035)
Os06g0146400	0.835127	1.93515e-05	OsISC7	IRON-SULFUR CLUSTER PROTEIN 7	FeS cluster insertion domain containing protein.	Biological Process: iron-sulfur cluster assembly (GO:0016226), Molecular Function: structural molecule activity (GO:0005198), Molecular Function: iron-sulfur cluster binding (GO:0051536)
Os12g0498300	0.83494	7.95135e-06			WD40 repeat-like domain containing protein.	Molecular Function: protein binding (GO:0005515)
Os09g0392000	0.833983	4.62189e-09			Similar to mRNA, clone: RTFL01-05-M08.	0
Os03g0736600	0.833867	0.00022647			Similar to ATP synthase.	Biological Process: ATP synthesis coupled proton transport (GO:0015986), Molecular Function: hydrogen ion transporting ATP synthase activity, rotational mechanism (GO:0046933)
Os05g0163000	0.833861	0.00708536	0	0	Arginyl-tRNA synthetase, class Ic family protein.	Biological Process: tRNA aminoacylation for protein translation (GO:0006418), Biological Process: arginyl-tRNA aminoacylation (GO:0006420), Cellular Component: cytoplasm (GO:0005737), Molecular Function: nucleotide binding (GO:0000166), Molecular Function: aminoacyl-tRNA ligase activity (GO:0004812), Molecular Function: arginine-tRNA ligase activity (GO:0004814), Molecular Function: ATP binding (…
Os07g0621400	0.833687	0.00381294			Similar to cDNA clone:002-132-C09, full insert sequence.	0
Os01g0762300	0.83345	1.31691e-06			Similar to predicted protein.	0
Os02g0638300	0.832906	2.17164e-05			Similar to Ferredoxin-thioredoxin reductase, variable chain (FTR-V) (Ferredoxin- thioredoxin reductase subunit A) (FTR-A).	Biological Process: lipoate biosynthetic process (GO:0009107), Biological Process: photosynthesis (GO:0015979), Cellular Component: plastid (GO:0009536), Molecular Function: ferredoxin-NAD(P) reductase activity (GO:0008937), Molecular Function: lipoate synthase activity (GO:0016992), Molecular Function: 4 iron, 4 sulfur cluster binding (GO:0051539)
Os08g0484800	0.832147	0.000184603			Hypothetical conserved gene.	0
Os01g0588500	0.831674	1.04598e-05	OsRLCK40	RECEPTOR-LIKE CYTOPLASMIC KINASE 40	Similar to Avr9/Cf-9 induced kinase 1.	Biological Process: protein phosphorylation (GO:0006468), Molecular Function: protein kinase activity (GO:0004672), Molecular Function: protein serine/threonine kinase activity (GO:0004674), Molecular Function: ATP binding (GO:0005524), Molecular Function: transferase activity, transferring phosphorus-containing groups (GO:0016772)
Os02g0129800	0.831469	0.00644614			Conserved hypothetical protein.	0
Os05g0401100	0.83094	0.0049076			Protein of unknown function DUF477 family protein.	0
Os08g0110100	0.830927	0.00183139			Ribosomal protein L30 family protein.	Biological Process: translation (GO:0006412), Cellular Component: ribosome (GO:0005840), Cellular Component: large ribosomal subunit (GO:0015934), Molecular Function: structural constituent of ribosome (GO:0003735)
Os06g0185900	0.830715	2.77861e-06	OsGpx4, GPX4, OsGPx04, OsGPX4	GLUTATHIONE PEROXIDASE 4	Similar to Glutathione peroxidase.	Biological Process: response to oxidative stress (GO:0006979), Biological Process: oxidation-reduction process (GO:0055114), Molecular Function: glutathione peroxidase activity (GO:0004602)
Os09g0428500	0.830087	0.000383805			Conserved hypothetical protein.	0
Os07g0242050	0.829758	0.000718846			Non-protein coding transcript.	0
Os07g0569550	0.829718	0.000280679			Similar to protein kinase.	Biological Process: protein phosphorylation (GO:0006468), Molecular Function: protein kinase activity (GO:0004672), Molecular Function: protein serine/threonine kinase activity (GO:0004674), Molecular Function: binding (GO:0005488), Molecular Function: ATP binding (GO:0005524), Molecular Function: sugar binding (GO:0005529), Molecular Function: transferase activity, transferring phosphorus-contai…
Os10g0493300	0.829672	2.20472e-06			Hypothetical protein.	0
Os06g0286400	0.82855	6.79877e-07			Non-protein coding transcript.	0
Os02g0822600	0.828488	0.00134682			Similar to 50S ribosomal protein L9.	Biological Process: translation (GO:0006412), Cellular Component: intracellular (GO:0005622), Cellular Component: ribosome (GO:0005840), Molecular Function: structural constituent of ribosome (GO:0003735)
Os07g0597400	0.828355	0.000607727			Conserved hypothetical protein.	0
Os06g0638200	0.828016	1.2593e-07			Uncharacterised protein family UPF0047 domain containing protein.	0
Os06g0698600	0.827366	3.62625e-06	OsEXO70G2, OsExo70G2, OrysaG2_Exo70	EXOCYST SUBUNIT EXO70 FAMILY PROTEIN G2	Exo70 exocyst complex subunit family protein.	Biological Process: exocytosis (GO:0006887), Cellular Component: exocyst (GO:0000145)
Os01g0161300	0.826915	0.000280679			Hypothetical conserved gene.	Molecular Function: protein binding (GO:0005515)
Os01g0819500	0.826625	2.76818e-06	OsUBC22	UBIQUITIN-CONJUGATING ENZYME 22	Similar to Ubiquitin-conjugating enzyme E2-17 kDa 11 (EC 6.3.2.19) (Ubiquitin- protein ligase 11) (Ubiquitin carrier protein 11).	Molecular Function: acid-amino acid ligase activity (GO:0016881)
Os12g0181600	0.826134	2.35892e-05	OsAAP11B, AAP11B, OsAAP15, AAP15	0	Amino acid transporter, transmembrane domain containing protein.	0
Os03g0132000	0.825859	5.28954e-09	OsACS4, ACS4	0	Similar to 4-coumarate-CoA ligase-like protein.	Biological Process: metabolic process (GO:0008152), Molecular Function: catalytic activity (GO:0003824)
Os01g0913100	0.825451	0.00664852			Protein of unknown function DUF538 family protein.	0
Os11g0544000	0.825445	0.00130583			Hypothetical conserved gene.	0
Os06g0103400	0.824646	1.54587e-07			Nucleic acid-binding, OB-fold domain containing protein.	0
Os07g0405100	0.824525	0.000442112	OsWD40-141	0	Similar to F-box-like/WD-repeat protein ebi.	Molecular Function: protein binding (GO:0005515)
Os03g0300000	0.824043	0.00105184	OsXXT1, SRH2	0	Similar to Xyloglucan 6-xylosyltransferase (EC 2.4.2.39) (AtXT1).	Cellular Component: integral to membrane (GO:0016021), Molecular Function: transferase activity, transferring hexosyl groups (GO:0016758)
Os03g0324200	0.823644	1.1582e-09	OsEIL1, EIN3, OsEIN3	EIN3-LIKE PROTEIN 1	Transcription factor involved in the ethylene signal transduction pathway, Positive regulator of ethylene response, Wound signaling	Molecular Function: sequence-specific DNA binding transcription factor activity (GO:0003700), Cellular Component: nucleus (GO:0005634)
Os01g0165200	0.82347	0.00135942			Kelch-type beta propeller domain containing protein.	Molecular Function: protein binding (GO:0005515)
Os08g0127500	0.82347	0.00111989			Acid phosphatase/vanadium-dependent haloperoxidase related family protein.	0
Os05g0466700	0.823313	4.61324e-08			Non-protein coding transcript.	0
Os09g0560300	0.822521	2.22112e-05			Conserved hypothetical protein.	0
Os04g0583200	0.822197	6.04341e-05			Conserved hypothetical protein.	0
Os03g0371400	0.822	0.00273157			Cytochrome P450 family protein.	Biological Process: oxidation-reduction process (GO:0055114), Molecular Function: iron ion binding (GO:0005506), Molecular Function: electron carrier activity (GO:0009055), Molecular Function: oxidoreductase activity, acting on paired donors, with incorporation or reduction of molecular oxygen (GO:0016705), Molecular Function: heme binding (GO:0020037)
Os07g0100200	0.821581	2.26144e-05	OsPDX1.3a	PYRIDOXINE BIOSYNTHESIS PROTEIN 1.3A	Similar to PDX1-like protein 4.	Biological Process: metabolic process (GO:0008152), Biological Process: pyridoxal phosphate biosynthetic process (GO:0042823), Molecular Function: catalytic activity (GO:0003824)
Os07g0289400	0.82158	4.55269e-06			Conserved hypothetical protein.	0
Os04g0449400	0.820825	7.97709e-05	OsPP2C40, PP2C40, OsPP65	0	Similar to H0818E04.11 protein.	Molecular Function: catalytic activity (GO:0003824)
Os03g0639600	0.819918	2.83157e-09	OsLSD2	0	Similar to Zinc-finger protein Lsd1.	0
Os08g0301600	0.819905	3.57692e-06			Conserved hypothetical protein.	0
Os02g0329300	0.817956	0.00915009			Conserved hypothetical protein.	0
Os08g0360100	0.817739	0.000207962			RNA-binding, CRM domain domain containing protein.	Molecular Function: RNA binding (GO:0003723)
Os01g0186200	0.817371	4.43702e-09			Similar to Phototropin.	Biological Process: regulation of transcription, DNA-dependent (GO:0006355), Biological Process: signal transduction (GO:0007165), Molecular Function: signal transducer activity (GO:0004871)
Os02g0784900	0.81625	0.000631096			RmlC-like jelly roll fold domain containing protein.	0
Os01g0603300	0.815973	0.000154747			Similar to MCB2 protein.	Biological Process: regulation of transcription, DNA-dependent (GO:0006355), Molecular Function: nucleic acid binding (GO:0003676), Molecular Function: DNA binding (GO:0003677), Molecular Function: protein binding (GO:0005515), Molecular Function: zinc ion binding (GO:0008270)
Os05g0196400	0.815657	1.89044e-09			Conserved hypothetical protein.	0
Os05g0497300	0.815433	1.21394e-06	OsERF#074, OsERF074, OsERF74, AP2/EREBP#051, AP2/EREBP51	ETHYLENE RESPONSE FACTOR 74	Similar to Ethylene response factor 2.	Biological Process: regulation of transcription, DNA-dependent (GO:0006355), Molecular Function: DNA binding (GO:0003677), Molecular Function: sequence-specific DNA binding transcription factor activity (GO:0003700)
Os05g0155400	0.814865	0.000719463	OsGATA13	GATA TRANSCRIPTION FACTOR 13	Zinc finger, NHR/GATA-type domain containing protein.	Biological Process: regulation of transcription, DNA-dependent (GO:0006355), Molecular Function: sequence-specific DNA binding transcription factor activity (GO:0003700), Molecular Function: zinc ion binding (GO:0008270), Molecular Function: sequence-specific DNA binding (GO:0043565)
Os03g0655700	0.814572	2.37136e-05			Similar to 3-isopropylmalate dehydrogenase 2.	Biological Process: leucine biosynthetic process (GO:0009098), Biological Process: oxidation-reduction process (GO:0055114), Cellular Component: cytoplasm (GO:0005737), Molecular Function: magnesium ion binding (GO:0000287), Molecular Function: 3-isopropylmalate dehydrogenase activity (GO:0003862), Molecular Function: oxidoreductase activity, acting on the CH-OH group of donors, NAD or NADP as ac…
Os09g0569100	0.814403	0.000393296			Haloacid dehalogenase-like hydrolase domain containing protein.	Biological Process: metabolic process (GO:0008152), Molecular Function: catalytic activity (GO:0003824), Molecular Function: hydrolase activity (GO:0016787)
Os11g0104933	0.814226	4.17395e-05			Non-protein coding transcript.	0
Os09g0266000	0.812747	7.60414e-05			Similar to predicted protein.	0
Os01g0283300	0.81205	1.05856e-05			Conserved hypothetical protein.	0
Os05g0467300	0.811724	2.26676e-09			SelT/selW/selH selenoprotein family protein.	Biological Process: cell redox homeostasis (GO:0045454), Molecular Function: selenium binding (GO:0008430)
Os03g0857750	0.811658	0.00569503			Similar to predicted protein.	0
Os02g0823400	0.811386	0.00169889	OsCOMTL4, COMT2	CAFFEIC ACID 3-O-METHYLTRANSFERASE LIKE 4	Similar to S-adenosyl-L-methionine: beta-alanine N-methyltransferase (Fragment).	Molecular Function: O-methyltransferase activity (GO:0008171)
Os09g0369050	0.810571	4.34042e-09			Similar to DRE binding factor 2.	0
Os06g0280900	0.810569	9.02826e-06			Conserved hypothetical protein.	0
Os01g0923000	0.809798	2.14666e-05			Conserved hypothetical protein.	0
Os07g0409200	0.809674	1.23943e-06			Carbohydrate kinase, FGGY domain containing protein.	Biological Process: carbohydrate metabolic process (GO:0005975), Molecular Function: phosphotransferase activity, alcohol group as acceptor (GO:0016773)
Os09g0382500	0.808862	2.39467e-05	0	SUCCINATE DEHYDROGENASE SUBUNIT 7	Conserved hypothetical protein.	0
Os11g0485500	0.806312	1.45647e-05			Hypothetical protein.	0
Os02g0744900	0.806248	0.00174739	OsChl P, CHL P, ChlP, OsGGRI, GGRI, OsGGR, GGR	0	Geranylgeranyl reductase (EC:1.3.1.83), Chlorophyll and &alpha;-tocopherol synthesis, Response to light stress, Protection of photooxidative damage	Biological Process: photosynthesis (GO:0015979), Biological Process: chlorophyll biosynthetic process (GO:0015995), Biological Process: cofactor biosynthetic process (GO:0051188), Biological Process: oxidation-reduction process (GO:0055114), Molecular Function: oxidoreductase activity, acting on the CH-CH group of donors, NAD or NADP as acceptor (GO:0016628), Molecular Function: geranylgeranyl re…
Os04g0517500	0.806222	0.000719852			Similar to Phosphoenolpyruvate carboxylase kinase.	Biological Process: protein phosphorylation (GO:0006468), Molecular Function: protein kinase activity (GO:0004672), Molecular Function: protein serine/threonine kinase activity (GO:0004674), Molecular Function: protein tyrosine kinase activity (GO:0004713), Molecular Function: ATP binding (GO:0005524), Molecular Function: transferase activity, transferring phosphorus-containing groups (GO:0016772)
Os09g0439500	0.806188	0.000721787	0	0	Similar to Type II chlorophyll a/b binding protein from photosystem I precursor.	Biological Process: photosynthesis, light harvesting (GO:0009765), Cellular Component: membrane (GO:0016020)
Os01g0865100	0.806085	0.000445774			Similar to Uricase (Fragment).	0
Os07g0562700	0.805428	0.00253374	0	0	Similar to Type III chlorophyll a/b-binding protein (Fragment).	Biological Process: photosynthesis, light harvesting (GO:0009765), Cellular Component: membrane (GO:0016020)
Os10g0437000	0.804958	0.000239576			Similar to Secondary cell wall-related glycosyltransferase family 14.	Cellular Component: membrane (GO:0016020), Molecular Function: acetylglucosaminyltransferase activity (GO:0008375)
Os02g0790500	0.804308	4.79497e-05	OsTPS5	TREHALOSE-6-PHOSPHATE SYNTHASE 5	Hypothetical protein.	0
Os08g0564100	0.804283	7.26698e-08	OsABCF4	ABC TRANSPORTER F FAMILY MEMBER 4	Similar to ATP-binding cassette, sub-family F, member 2 (Iron inhibited ABC transporter 2) (HUSSY-18).	Molecular Function: nucleotide binding (GO:0000166), Molecular Function: ATP binding (GO:0005524), Molecular Function: ATPase activity (GO:0016887), Molecular Function: nucleoside-triphosphatase activity (GO:0017111)
Os02g0734400	0.803174	0.00202141			Similar to ABA-induced protein.	0
Os12g0547100	0.802293	0.000249816			Conserved hypothetical protein.	0
Os01g0884200	0.801498	0.00341186			Hypothetical gene.	0
Os05g0406000	0.801497	1.08325e-07			Conserved hypothetical protein.	0
Os03g0731025	0.800102	0.00872625			Hypothetical gene.	0
Os03g0723600	0.800036	4.56658e-06			Conserved hypothetical protein.	0
Os01g0938100	0.799773	0.00346838	Psb28	0	Photosystem II protein Psb28, class 1 domain containing protein.	Biological Process: photosynthesis (GO:0015979), Cellular Component: photosystem II (GO:0009523), Cellular Component: oxygen evolving complex (GO:0009654), Cellular Component: membrane (GO:0016020)
Os03g0219900	0.79946	0.00258758			Similar to 50S ribosomal protein L15, chloroplast precursor (CL15) (Fragment).	Biological Process: translation (GO:0006412), Cellular Component: intracellular (GO:0005622), Cellular Component: ribosome (GO:0005840), Cellular Component: large ribosomal subunit (GO:0015934), Molecular Function: structural constituent of ribosome (GO:0003735)
Os07g0185500	0.799337	1.29586e-07			Non-protein coding transcript.	0
Os08g0440300	0.799062	9.5551e-07			Component of the CCR4-NOTcomplex, Deadenylase, Deadenylation (poly(A) tail shortening), Development and stress response	Molecular Function: nucleic acid binding (GO:0003676), Cellular Component: nucleus (GO:0005634)
Os01g0766900	0.798812	0.000251971	OsCslC1, OsCSLC1	CELLULOSE SYNTHASE LIKE C1	Hypothetical protein.	0
Os07g0461900	0.798266	0.000294944			Similar to Acetylornithine aminotransferase, mitochondrial precursor (EC 2.6.1.11) (ACOAT) (Acetylornithine transaminase) (AOTA).	Biological Process: arginine metabolic process (GO:0006525), Molecular Function: catalytic activity (GO:0003824), Molecular Function: transaminase activity (GO:0008483), Molecular Function: pyridoxal phosphate binding (GO:0030170)
Os07g0682400	0.797823	2.97066e-09	OsC3H53	ZINC FINGER CCCH DOMAIN-CONTAINING PROTEIN 53	Nucleotide-binding, alpha-beta plait domain containing protein.	Molecular Function: nucleotide binding (GO:0000166), Molecular Function: nucleic acid binding (GO:0003676), Molecular Function: zinc ion binding (GO:0008270)
Os05g0142200	0.796076	5.95805e-08			Conserved hypothetical protein.	0
Os04g0691800	0.795348	0.00139704			C2 domain containing protein.	Molecular Function: protein binding (GO:0005515)
Os03g0229500	0.795122	8.33174e-05			Similar to MATE efflux family protein, expressed.	Biological Process: drug transmembrane transport (GO:0006855), Biological Process: transmembrane transport (GO:0055085), Cellular Component: membrane (GO:0016020), Molecular Function: drug transmembrane transporter activity (GO:0015238), Molecular Function: antiporter activity (GO:0015297)
Os06g0646100	0.793825	0.000442112			Conserved hypothetical protein.	0
Os03g0411300	0.793555	7.34569e-05			EF-Hand type domain containing protein.	Molecular Function: calcium ion binding (GO:0005509)
Os10g0188300	0.793332	0.000936242	OsNTP10	NUCLEOTIDYL TRANSFERASE PROTEIN 10	Similar to JHL05D22.13 protein.	Molecular Function: nucleotidyltransferase activity (GO:0016779)
Os02g0749800	0.793081	0.000224295			Mitochodrial transcription termination factor-related family protein.	0
Os05g0516300	0.792432	1.3027e-06			Conserved hypothetical protein.	0
Os06g0343000	0.792337	0.000530731	0	0	Hypothetical conserved gene.	0
Os04g0201500	0.792192	0.00120312			Similar to amino acid permease.	0
Os02g0762100	0.792166	0.00772498			Similar to Regulator of ribonuclease-like protein 2.	Biological Process: regulation of RNA metabolic process (GO:0051252), Molecular Function: ribonuclease inhibitor activity (GO:0008428)
Os07g0587400	0.791951	1.59951e-06			Similar to Eukaryotic peptide chain release factor subunit 1-3 (eRF1-3) (Eukaryotic release factor 1-3) (Omnipotent suppressor protein 1 homolog 3) (SUP1 homolog 3).	Biological Process: translational termination (GO:0006415), Cellular Component: cytoplasm (GO:0005737), Molecular Function: translation release factor activity, codon specific (GO:0016149)
Os01g0602466	0.791918	0.00139992			Hypothetical protein.	0
Os08g0119500	0.791507	0.00698143			Methyltransferase type 11 domain containing protein.	Biological Process: metabolic process (GO:0008152), Molecular Function: methyltransferase activity (GO:0008168)
Os11g0685700	0.791416	9.21982e-07	OsWRKY61, OsWRKY103, WRKY103	TRANSCRIPTION FACTOR WRKY	Similar to WRKY transcription factor 61.	Biological Process: regulation of transcription, DNA-dependent (GO:0006355), Molecular Function: sequence-specific DNA binding transcription factor activity (GO:0003700), Molecular Function: sequence-specific DNA binding (GO:0043565)
Os03g0165266	0.791062	0.00759599			Hypothetical conserved gene.	Molecular Function: nucleic acid binding (GO:0003676), Molecular Function: DNA binding (GO:0003677), Molecular Function: helicase activity (GO:0004386), Molecular Function: ATP binding (GO:0005524)
Os01g0559550	0.790972	0.000499393	0	0	Non-protein coding transcript.	0
Os03g0787600	0.790954	2.27445e-11			Conserved hypothetical protein.	0
Os03g0808300	0.790696	1.09887e-08	OsREM4.2	REMORIN 4.2	Remorin, C-terminal region domain containing protein.	0
Os05g0200100	0.790244	7.09689e-09			Similar to Thioredoxin-like 6.	Biological Process: glycerol ether metabolic process (GO:0006662), Biological Process: cell redox homeostasis (GO:0045454), Molecular Function: electron carrier activity (GO:0009055), Molecular Function: protein disulfide oxidoreductase activity (GO:0015035)
Os04g0436100	0.789508	3.4348e-08			Thioesterase superfamily domain containing protein.	0
Os03g0353400	0.789007	1.31469e-05	0	0	Similar to Poly(A)-binding protein C-terminal interacting protein 6.	0
Os10g0357850	0.788886	0.00207223			Hypothetical gene.	0
Os05g0215300	0.788257	2.13405e-05	0	UDP-GLUCOSE-DEPENDENT GLYCOSYLTRANSFERASE 72F1	UDP-glucuronosyl/UDP-glucosyltransferase family protein.	Biological Process: metabolic process (GO:0008152), Molecular Function: transferase activity, transferring hexosyl groups (GO:0016758)
Os03g0708500	0.78817	5.08529e-07	OsFKBP17-2	_	Capsid/spike protein, ssDNA virus domain containing protein.	Biological Process: protein folding (GO:0006457)
Os01g0966700	0.787574	0.000154332			Similar to Beta-fructofuranosidase (EC 3.2.1.26) (Fragment).	Biological Process: carbohydrate metabolic process (GO:0005975), Molecular Function: hydrolase activity, hydrolyzing O-glycosyl compounds (GO:0004553)
Os05g0497675	0.787454	8.70508e-05			Ribosomal L11 methyltransferase family protein.	Biological Process: protein methylation (GO:0006479), Cellular Component: cytoplasm (GO:0005737), Molecular Function: protein methyltransferase activity (GO:0008276)
Os05g0490900	0.786301	1.53106e-05			Conserved hypothetical protein.	0
Os08g0560900	0.785817	0.00122827	PsaD	PHOTOSYSTEM I SUBUNIT	Similar to Photosystem I reaction center subunit II, chloroplast precursor (Photosystem I 20 kDa subunit) (PSI-D).	Biological Process: photosynthesis (GO:0015979), Cellular Component: photosystem I (GO:0009522), Cellular Component: photosystem I reaction center (GO:0009538)
Os05g0439400	0.785398	0.00484947	OsPUB44	0	Similar to Arm repeat containing protein.	Biological Process: protein ubiquitination (GO:0016567), Cellular Component: ubiquitin ligase complex (GO:0000151), Molecular Function: ubiquitin-protein ligase activity (GO:0004842)
Os01g0901500	0.785324	0.00139526	OsACS5, ACS5	0	Similar to 4-coumarate--CoA ligase-like 5.	Biological Process: metabolic process (GO:0008152), Molecular Function: catalytic activity (GO:0003824)
Os04g0531100	0.785091	0.00444783	Rpp16(t), ERG3, OsERG3	PHLOEM PROTEIN 16	Small C2-domain protein consisting of a single C2 domain, Phloem protein, Signaling pathway involving Ca<sup>2+</sup> ions, Defense response	0
Os02g0745800	0.784879	0.0082431			Similar to EMB2756.	0
Os04g0655100	0.784572	0.0049574			Non-protein coding transcript.	0
Os03g0174800	0.784439	1.03852e-05			Conserved hypothetical protein.	0
Os05g0499800	0.784386	1.7257e-06			UDP-glucuronosyl/UDP-glucosyltransferase family protein.	Biological Process: metabolic process (GO:0008152), Molecular Function: transferase activity, transferring hexosyl groups (GO:0016758)
Os10g0564200	0.78434	3.81546e-05			Homeodomain-like containing protein.	0
Os07g0468900	0.78433	0.00128268			Hypothetical gene.	0
Os06g0717200	0.783826	0.000367555	fon1, OsRLCK219, RLCK219	RECEPTOR-LIKE CYTOPLASMIC KINASE 219	Serine/threonine protein kinase domain containing protein.	Biological Process: protein phosphorylation (GO:0006468), Molecular Function: protein kinase activity (GO:0004672), Molecular Function: protein serine/threonine kinase activity (GO:0004674), Molecular Function: protein tyrosine kinase activity (GO:0004713), Molecular Function: protein binding (GO:0005515), Molecular Function: ATP binding (GO:0005524), Molecular Function: transferase activity, tra…
Os04g0118400	0.783433	9.83623e-08			Similar to Elongation factor EF-2 (Fragment).	Molecular Function: GTPase activity (GO:0003924), Molecular Function: GTP binding (GO:0005525)
Os03g0341200	0.782635	7.9564e-05			Conserved hypothetical protein.	0
Os12g0291033	0.782368	0.000452668			Hypothetical conserved gene.	0
Os03g0336000	0.781867	0.00072469			Pentatricopeptide repeat domain containing protein.	Molecular Function: binding (GO:0005488)
Os01g0738000	0.781413	0.00729255			Conserved hypothetical protein.	0
Os09g0449600	0.781411	4.43702e-09	OsFbox490, Os_F0091	0	Similar to F-box protein interaction domain containing protein, expressed.	Molecular Function: protein binding (GO:0005515)
Os05g0552100	0.78141	1.26122e-05			Conserved hypothetical protein.	0
Os01g0745300	0.780892	2.44807e-07			Similar to cDNA, clone: J075185I03, full insert sequence.	0
Os06g0682300	0.780732	6.17329e-05			Conserved hypothetical protein.	0
Os06g0656000	0.780645	0.0069088			Hypothetical conserved gene.	Biological Process: alcohol metabolic process (GO:0006066), Biological Process: oxidation-reduction process (GO:0055114), Molecular Function: choline dehydrogenase activity (GO:0008812), Molecular Function: oxidoreductase activity, acting on CH-OH group of donors (GO:0016614), Molecular Function: flavin adenine dinucleotide binding (GO:0050660)
Os01g0872500	0.780612	0.00301259			Oligopeptide transporter domain containing protein.	Biological Process: oligopeptide transport (GO:0006857), Cellular Component: membrane (GO:0016020), Molecular Function: transporter activity (GO:0005215)
Os02g0223700	0.780424	4.30448e-06			Protein of unknown function DUF3511 domain containing protein.	0
Os04g0623800	0.780381	0.000121169	Amt	0	Similar to Aminomethyltransferase, mitochondrial precursor (EC 2.1.2.10) (Glycine cleavage system T protein) (GCVT).	Biological Process: glycine catabolic process (GO:0006546), Cellular Component: cytoplasm (GO:0005737), Molecular Function: aminomethyltransferase activity (GO:0004047)
Os01g0853000	0.780017	8.07034e-06			Conserved hypothetical protein.	0
Os07g0568900	0.779972	0.00300321			Conserved hypothetical protein.	0
Os02g0768950	0.779484	2.31653e-05			Non-protein coding transcript.	0
Os09g0536700	0.778905	1.46507e-05	OsMFS5	MAJOR FACILITATOR SUPERFAMILY 5	Similar to predicted protein.	0
Os08g0428800	0.778769	7.86054e-07			Similar to High mobility group I/Y-2.	Biological Process: nucleosome assembly (GO:0006334), Biological Process: regulation of transcription, DNA-dependent (GO:0006355), Cellular Component: chromatin (GO:0000785), Cellular Component: nucleosome (GO:0000786), Cellular Component: nucleus (GO:0005634), Molecular Function: DNA binding (GO:0003677)
Os09g0306650	0.778559	0.00250319			Hypothetical conserved gene.	0
Os06g0710001	0.778433	0.00105523	OsCEP7, CEP7, OsCEP7.1, CEP7.1	0	Hypothetical conserved gene.	0
Os01g0320700	0.778216	0.00699141			Hypothetical protein.	0
Os03g0206400	0.777768	1.42393e-05			Conserved hypothetical protein.	0
Os01g0945300	0.777596	0.00124226	OsBAT4	0	Amino acid/polyamine transporter I family protein.	Biological Process: amino acid transmembrane transport (GO:0003333), Biological Process: transport (GO:0006810), Biological Process: transmembrane transport (GO:0055085), Cellular Component: membrane (GO:0016020), Molecular Function: amino acid transmembrane transporter activity (GO:0015171)
Os06g0178900	0.77751	0.00121528	OVP2	0	Vacuolar H+-pyrophosphatase (EC 3.6.1.1) (Ovp2).	Biological Process: proton transport (GO:0015992), Cellular Component: membrane (GO:0016020), Molecular Function: inorganic diphosphatase activity (GO:0004427), Molecular Function: hydrogen-translocating pyrophosphatase activity (GO:0009678)
Os12g0189400	0.777386	0.000748403	0	0	Similar to Photosystem I reaction centre subunit N, chloroplast precursor (PSI- N).	Biological Process: photosynthesis (GO:0015979), Cellular Component: photosystem I (GO:0009522), Cellular Component: thylakoid membrane (GO:0042651), Molecular Function: calmodulin binding (GO:0005516)
Os02g0202200	0.775437	8.16142e-05	OsSPX2, SPX2	0	SPX domain-containing protein, Pi-dependent inhibition of phosphate starvation responses	Biological Process: cellular response to phosphate starvation (GO:0016036)
Os09g0455500	0.775151	0.000466616			Alpha/beta hydrolase fold-3 domain containing protein.	Biological Process: metabolic process (GO:0008152), Molecular Function: hydrolase activity (GO:0016787)
Os07g0522900	0.774848	0.000223113			Similar to SGP1 monomeric G-protein.	Biological Process: small GTPase mediated signal transduction (GO:0007264), Molecular Function: GTP binding (GO:0005525)
Os05g0420000	0.774781	5.95315e-06			Hypothetical protein.	0
Os01g0612800	0.774534	6.80971e-05			Conserved hypothetical protein.	0
Os01g0730800	0.773294	2.05675e-08			Mpv17/PMP22 family protein.	Cellular Component: integral to membrane (GO:0016021)
Os08g0139400	0.772753	0.000254649	OsPUB30	0	Non-protein coding transcript.	0
Os07g0131600	0.772627	5.16404e-08			Similar to Monosaccharide transporter.	Biological Process: transport (GO:0006810), Biological Process: transmembrane transport (GO:0055085), Cellular Component: membrane (GO:0016020), Cellular Component: integral to membrane (GO:0016021), Molecular Function: transporter activity (GO:0005215), Molecular Function: transmembrane transporter activity (GO:0022857), Molecular Function: substrate-specific transmembrane transporter activity (…
Os11g0141800	0.772535	7.06134e-05			Conserved hypothetical protein.	0
Os09g0361100	0.772425	0.000268624	OsRLCK268	RECEPTOR-LIKE CYTOPLASMIC KINASE 268	Similar to Protein kinase.	Biological Process: protein phosphorylation (GO:0006468), Molecular Function: protein kinase activity (GO:0004672), Molecular Function: protein serine/threonine kinase activity (GO:0004674), Molecular Function: ATP binding (GO:0005524), Molecular Function: transferase activity, transferring phosphorus-containing groups (GO:0016772)
Os10g0478400	0.772262	0.000123739			Conserved hypothetical protein.	0
Os03g0135400	0.772182	6.57529e-12	OsFbox128, Os_F0506	0	Cyclin-like F-box domain containing protein.	Molecular Function: protein binding (GO:0005515)
Os05g0346901	0.771816	0.00405816			Non-protein coding transcript.	0
Os04g0667800	0.771637	2.858e-06	Dhr6, OsUBC5b, OsUBC16, UBC16	0	Ubiquitin-conjugating enzyme (EC 6.3.2.19) (Ubiquitin carrier protein).	Molecular Function: acid-amino acid ligase activity (GO:0016881)
Os08g0104600	0.771494	0.00466104	Fd1, OsFd1, ADI1	0	Ferredoxin I, chloroplast precursor (Anti-disease protein 1).	0
Os12g0148500	0.771463	0.00160106			Non-protein coding transcript.	0
Os03g0777500	0.770877	0.000190586			Protein of unknown function DUF1068 family protein.	0
Os01g0286600	0.770786	0.00184033			Similar to Plastidal protoporphyrinogen oxidase.	Biological Process: porphyrin-containing compound biosynthetic process (GO:0006779), Biological Process: oxidation-reduction process (GO:0055114), Molecular Function: nucleotide binding (GO:0000166), Molecular Function: oxygen-dependent protoporphyrinogen oxidase activity (GO:0004729), Molecular Function: oxidoreductase activity (GO:0016491)
Os01g0106750	0.77074	0.000503809			Non-protein coding transcript.	0
Os09g0502350	0.770687	0.00401628			Non-protein coding transcript.	0
Os05g0188100	0.770016	9.24351e-06			Conserved hypothetical protein.	0
Os01g0661601	0.769738	5.38703e-06			Hypothetical gene.	0
Os05g0244600	0.767496	0.00021399			Similar to OB-fold nucleic acid binding domain containing protein.	0
Os08g0237000	0.767456	0.00417619	OsXTH17, OsXTH8	XYLOGLUCAN ENDOTRANSGLUCOSYLASE/HYDROLASE 17	Xyloglucan endotransglycosylase/hydrolase protein 8 precursor (EC 2.4.1.207) (End-xyloglucan transferase) (OsXTH8) (OsXRT5).	Biological Process: carbohydrate metabolic process (GO:0005975), Biological Process: cellular glucan metabolic process (GO:0006073), Cellular Component: cell wall (GO:0005618), Cellular Component: apoplast (GO:0048046), Molecular Function: hydrolase activity, hydrolyzing O-glycosyl compounds (GO:0004553), Molecular Function: xyloglucan:xyloglucosyl transferase activity (GO:0016762)
Os04g0493000	0.766633	3.41977e-08	OsBBX11, OsSTO	0	Similar to H0425E08.14 protein.	0
Os07g0196200	0.766532	1.89312e-05			Protein of unknown function DUF3252 domain containing protein.	0
Os02g0815400	0.765303	0.000519342			Similar to Tfm5 protein.	0
Os10g0577200	0.765062	0.00272575			Conserved hypothetical protein.	0
Os09g0491644	0.764726	1.13969e-05			Conserved hypothetical protein.	0
Os03g0722200	0.764301	0.000245982			Hypothetical protein.	0
Os07g0265100	0.763656	0.00139117	UTR319	0	Conserved hypothetical protein.	0
Os03g0204300	0.763609	0.000750895			Conserved hypothetical protein.	0
Os05g0106600	0.763551	1.04236e-05			Similar to Actin 97.	0
Os10g0563600	0.763378	3.72504e-07	OsMSRA4, MSRA4, OsMSRA4.1, MSRA4.1	0	Similar to Peptide methionine sulfoxide reductase (EC 1.8.4.6) (Protein- methionine-S-oxide reductase) (Peptide Met(O) reductase).	Biological Process: protein metabolic process (GO:0019538), Biological Process: oxidation-reduction process (GO:0055114), Molecular Function: oxidoreductase activity, acting on a sulfur group of donors, disulfide as acceptor (GO:0016671)
Os05g0101400	0.762994	0.000443093			Similar to 50S ribosomal protein L28, chloroplast precursor.	Biological Process: translation (GO:0006412), Cellular Component: intracellular (GO:0005622), Cellular Component: ribosome (GO:0005840), Molecular Function: structural constituent of ribosome (GO:0003735)
Os12g0583400	0.762903	1.00567e-13			Conserved hypothetical protein.	0
Os10g0137000	0.759877	0.00545674	OsFbox527, Os_F0059	0	Cyclin-like F-box domain containing protein.	Molecular Function: protein binding (GO:0005515)
Os04g0617050	0.759841	0.00380422	OsSAUR21	SAUR PROTEIN 21	Similar to H0313F03.1 protein.	0
Os03g0257600	0.759324	0.000259098			Hypothetical conserved gene.	0
Os06g0543400	0.758969	0.00195083	OsCIPK25	CALCINEURIN B-LIKE PROTEIN-INTERACTING PROTEIN KINASE 25	Similar to CBL-interacting serine/threonine-protein kinase 11 (EC 2.7.1.37) (SOS2-like protein kinase PKS5) (SOS-interacting protein 4) (SNF1- related kinase 3.22).	Biological Process: protein phosphorylation (GO:0006468), Biological Process: signal transduction (GO:0007165), Molecular Function: protein kinase activity (GO:0004672), Molecular Function: protein serine/threonine kinase activity (GO:0004674), Molecular Function: ATP binding (GO:0005524), Molecular Function: transferase activity, transferring phosphorus-containing groups (GO:0016772)
Os04g0173300	0.758566	1.57781e-05			Hypothetical gene.	0
Os05g0349500	0.758377	0.00975334			Pleckstrin homology-type domain containing protein.	Biological Process: intracellular transport (GO:0046907), Cellular Component: nuclear pore (GO:0005643), Molecular Function: protein binding (GO:0005515)
Os11g0115400	0.758371	0.00213085			Lipid transfer protein LPT IV.	Biological Process: lipid transport (GO:0006869), Molecular Function: lipid binding (GO:0008289)
Os02g0567100	0.757679	7.23998e-07			Thioredoxin domain 2 containing protein.	Biological Process: glycerol ether metabolic process (GO:0006662), Biological Process: cell redox homeostasis (GO:0045454), Molecular Function: electron carrier activity (GO:0009055), Molecular Function: protein disulfide oxidoreductase activity (GO:0015035)
Os09g0536400	0.757511	2.66422e-07			Similar to Thaumatin-like protein 1 precursor.	0
Os03g0857100	0.756899	0.00167824			Hypothetical protein.	0
Os03g0856100	0.756864	2.87341e-05			Pentatricopeptide repeat domain containing protein.	Molecular Function: binding (GO:0005488)
Os06g0729000	0.756252	0.00455933	PSY1, OsPSY1	PHYTOENE SYNTHASE 1	Phytoene synthase 1 (EC 2.5.1.32).	Biological Process: biosynthetic process (GO:0009058), Molecular Function: transferase activity (GO:0016740), Molecular Function: transferase activity, transferring alkyl or aryl (other than methyl) groups (GO:0016765)
Os05g0343400	0.755664	8.73618e-05	OsWRKY53, WRKY-53	TRANSCRIPTION FACTOR WRKY53	WRKY transcription factor, Disease resistance, Defense response	Biological Process: regulation of transcription, DNA-templated (GO:0006355), Molecular Function: transcription factor activity, sequence-specific DNA binding (GO:0003700), Molecular Function: sequence-specific DNA binding (GO:0043565)
Os08g0233000	0.75544	0.000129431			Non-protein coding transcript.	0
Os01g0963400	0.754689	3.92212e-06			Thioredoxin family protein.	Biological Process: glycerol ether metabolic process (GO:0006662), Biological Process: cell redox homeostasis (GO:0045454), Molecular Function: electron carrier activity (GO:0009055), Molecular Function: protein disulfide oxidoreductase activity (GO:0015035)
Os08g0320100	0.754085	0.000340394			Nucleotide-binding, alpha-beta plait domain containing protein.	Molecular Function: nucleotide binding (GO:0000166), Molecular Function: nucleic acid binding (GO:0003676)
Os05g0141700	0.753443	0.000245765			Phosphoglycerate mutase domain containing protein.	Biological Process: metabolic process (GO:0008152), Molecular Function: catalytic activity (GO:0003824)
Os03g0651000	0.75329	0.000131558			Glu-tRNAGln amidotransferase, C subunit family protein.	Biological Process: regulation of translational fidelity (GO:0006450)
Os03g0214200	0.753279	2.77277e-12	MODD	0	Mediator of OsbZIP46 deactivation and degradation, Negative regulation of ABA signaling and drought tolerance	Biological Process: signal transduction (GO:0007165)
Os01g0513100	0.75288	7.66289e-07	OsPP2C03, PP2C03, OsPP2C3, PP2C3, OsPP7	0	Similar to Protein phosphatase 2C ABI2.	0
Os03g0726500	0.752716	0.00235736			Protein of unknown function DUF81 domain containing protein.	Cellular Component: integral to membrane (GO:0016021)
Os07g0438550	0.752204	3.99231e-13			Similar to salt-inducible protein kinase.	Biological Process: protein phosphorylation (GO:0006468), Molecular Function: protein kinase activity (GO:0004672), Molecular Function: transferase activity, transferring phosphorus-containing groups (GO:0016772)
Os03g0795200	0.751079	1.07903e-09			Pentatricopeptide repeat domain containing protein.	0
Os01g0805300	0.750769	1.7741e-06	PsbP	0	Mog1/PsbP, alpha/beta/alpha sandwich domain containing protein.	Biological Process: photosynthesis (GO:0015979), Cellular Component: photosystem II (GO:0009523), Cellular Component: oxygen evolving complex (GO:0009654), Cellular Component: extrinsic to membrane (GO:0019898), Molecular Function: calcium ion binding (GO:0005509)
Os03g0577200	0.750645	6.07984e-07			Similar to Mps one binder kinase activator-like 1A (Mob1 homolog 1A) (Mob1A) (Mob1B) (Protein Mob4A).	0
Os06g0147100	0.750597	9.30856e-05			Similar to cDNA clone:J023088C01, full insert sequence.	0
Os11g0648100	0.750412	2.90816e-05			Kinesin, motor domain domain containing protein.	Biological Process: microtubule-based movement (GO:0007018), Molecular Function: microtubule motor activity (GO:0003777), Molecular Function: ATP binding (GO:0005524)
Os10g0100300	0.750018	0.000730087	TIC62, Os-TIC26, OsTIC26	0	NAD(P)-binding domain containing protein.	Molecular Function: nucleotide binding (GO:0000166)
Os03g0847851	0.749992	9.89335e-06			Non-protein coding transcript.	0
Os04g0648900	0.749583	1.61954e-07	OsERF#008, OsERF008, OsERF8, AP2/EREBP#128, AP2/EREBP128	ETHYLENE RESPONSE FACTOR 8	Similar to Dehydration responsive element binding protein 2F (DREB2F protein).	Biological Process: regulation of transcription, DNA-dependent (GO:0006355), Molecular Function: DNA binding (GO:0003677), Molecular Function: sequence-specific DNA binding transcription factor activity (GO:0003700)
Os01g0692700	0.749531	7.62085e-08	OsRFPH2-23	0	Similar to Protein binding protein.	0
Os07g0569600	0.749142	2.64523e-07			Chaperonin-like RbcX domain containing protein.	0
Os01g0960000	0.748842	1.64018e-07			Gamma-secretase aspartyl protease complex, presenilin enhancer-2 subunit domain containing protein.	0
Os09g0306400	0.748425	1.54468e-05	OsbZIP71	b-ZIP TRANSCRIPTION FACTOR 71	bZIP transcription factor, Drought and salt tolerance	Biological Process: regulation of transcription, DNA-templated (GO:0006355), Molecular Function: transcription factor activity, sequence-specific DNA binding (GO:0003700), Molecular Function: sequence-specific DNA binding (GO:0043565)
Os04g0311500	0.748392	0.000218793			Non-protein coding transcript.	0
Os09g0442900	0.748288	0.000199537			Similar to Axi 1 (Auxin-independent growth promoter)-like protein.	0
Os04g0676100	0.748106	5.42516e-05	Trx x	0	Similar to Thioredoxin X, chloroplast precursor.	Biological Process: glycerol ether metabolic process (GO:0006662), Biological Process: cell redox homeostasis (GO:0045454), Molecular Function: electron carrier activity (GO:0009055), Molecular Function: protein disulfide oxidoreductase activity (GO:0015035)
Os02g0828400	0.748038	0.00611236			Conserved hypothetical protein.	0
Os10g0395200	0.747595	0.000939928			Conserved hypothetical protein.	0
Os05g0521400	0.747435	0.000240136	0	0	Conserved hypothetical protein.	0
Os08g0541400	0.747272	0.000476218	OsFKBP16-3	_	Peptidyl-prolyl cis-trans isomerase, FKBP-type domain containing protein.	Biological Process: protein folding (GO:0006457)
Os01g0170000	0.746756	0.00327478	RS5, OsRS5	0	Raffinose synthase family protein.	0
Os01g0741900	0.746228	4.71536e-05	OsIAA6	0	Auxin-responsive protein, Drought tolerance, Control of tiller outgrowth	Biological Process: regulation of transcription, DNA-templated (GO:0006355), Molecular Function: protein binding (GO:0005515), Cellular Component: nucleus (GO:0005634)
Os02g0826400	0.745796	1.10886e-06			Conserved hypothetical protein.	0
Os12g0557400	0.745615	0.000273959			Conserved hypothetical protein.	0
Os05g0229000	0.745507	3.12277e-07			Non-protein coding transcript.	0
Os09g0369400	0.745398	0.000603182	OsTPP7	TREHALOSE-6-PHOSPHATE PHOSHPHATASE 7	Similar to predicted protein.	Biological Process: trehalose biosynthetic process (GO:0005992), Biological Process: metabolic process (GO:0008152), Molecular Function: catalytic activity (GO:0003824)
Os12g0566200	0.745243	2.32827e-07			Conserved hypothetical protein.	0
Os12g0615400	0.74469	1.34769e-07	0	0	Similar to 37 kDa inner envelope membrane protein, chloroplast precursor (E37).	Biological Process: metabolic process (GO:0008152), Molecular Function: methyltransferase activity (GO:0008168)
Os08g0464400	0.744085	6.30143e-05			Zinc finger, RING/FYVE/PHD-type domain containing protein.	Molecular Function: protein binding (GO:0005515), Molecular Function: zinc ion binding (GO:0008270)
Os03g0582900	0.743968	0.000997513			Hypothetical gene.	0
Os08g0276100	0.743202	1.48687e-05			Similar to NDF1 (NDH-DEPENDENT CYCLIC ELECTRON FLOW 1).	Biological Process: metabolic process (GO:0008152), Molecular Function: transferase activity, transferring glycosyl groups (GO:0016757)
Os08g0566400	0.742967	1.423e-05			Ribokinase family protein.	Biological Process: D-ribose metabolic process (GO:0006014), Molecular Function: ribokinase activity (GO:0004747), Molecular Function: phosphotransferase activity, alcohol group as acceptor (GO:0016773)
Os04g0169500	0.742402	0.00117195			Similar to Avr9/Cf-9 rapidly elicited protein 137.	0
Os09g0437500	0.74225	2.22614e-06			Dormancyauxin associated family protein.	0
Os02g0600200	0.741785	3.011e-06			IQ calmodulin-binding region domain containing protein.	Molecular Function: protein binding (GO:0005515)
Os10g0403700	0.741526	2.22401e-05	Ord	0	Similar to oxidoreductase.	Biological Process: metabolic process (GO:0008152), Biological Process: oxidation-reduction process (GO:0055114), Molecular Function: nucleotide binding (GO:0000166), Molecular Function: oxidoreductase activity (GO:0016491)
Os01g0190300	0.741477	0.000329603			Similar to Auxin-responsive protein IAA26 (Indoleacetic acid-induced protein 26) (Phytochrome-associated protein 1).	Biological Process: regulation of transcription, DNA-dependent (GO:0006355), Cellular Component: nucleus (GO:0005634), Molecular Function: protein dimerization activity (GO:0046983)
Os09g0514600	0.741295	0.00212337			Beta-grasp fold, ferredoxin-type domain containing protein.	Molecular Function: electron carrier activity (GO:0009055), Molecular Function: iron-sulfur cluster binding (GO:0051536)
Os06g0101600	0.73971	0.00569607			Plastocyanin, chloroplast precursor.	Molecular Function: copper ion binding (GO:0005507), Molecular Function: electron carrier activity (GO:0009055)
Os05g0496200	0.739559	0.00764834			Similar to 3-phosphoglycerate kinase (Fragment).	Biological Process: glycolysis (GO:0006096), Molecular Function: phosphoglycerate kinase activity (GO:0004618)
Os05g0298200	0.73894	6.23891e-08			Ankyrin repeat containing protein.	Molecular Function: protein binding (GO:0005515)
Os03g0357200	0.738606	0.00249737			Non-protein coding transcript.	0
Os12g0514400	0.73815	5.97272e-07			Potyvirus VPg interacting protein (Fragment).	Molecular Function: protein binding (GO:0005515), Molecular Function: zinc ion binding (GO:0008270)
Os03g0160000	0.738083	3.58939e-06			Conserved hypothetical protein.	0
Os02g0588600	0.73785	0.000159652			Conserved hypothetical protein.	0
Os10g0498300	0.737829	1.84893e-06			Similar to Epoxide hydrolase.	Molecular Function: catalytic activity (GO:0003824)
Os02g0629200	0.737761	0.000728309	OsPIP2;2, PIP2-2, OsPIP2-3	PLASMA MEMBRANE INTRINSIC PROTEIN 2;2	Similar to cDNA clone:001-039-E03, full insert sequence.	Biological Process: transport (GO:0006810), Cellular Component: membrane (GO:0016020), Molecular Function: transporter activity (GO:0005215)
Os06g0166400	0.737682	0.000239558	OsERF#007, OsERF007, OsERF7, AP2/EREBP#142, AP2/EREBP142	ETHYLENE RESPONSE FACTOR 7	Similar to TINY-like protein (AP2 domain containing protein RAP2.10) (Fragment).	Biological Process: regulation of transcription, DNA-dependent (GO:0006355), Molecular Function: DNA binding (GO:0003677), Molecular Function: sequence-specific DNA binding transcription factor activity (GO:0003700)
Os07g0517100	0.737677	0.000353341			Heat shock protein Hsp20 domain containing protein.	0
Os10g0580800	0.737294	0.000492517	OsClpP4, ClpP4, OsClp11, CLP11	CHLOROPLAST PROTEASE 4	Similar to NClpP4 (Fragment).	Biological Process: proteolysis (GO:0006508), Molecular Function: serine-type endopeptidase activity (GO:0004252)
Os12g0616800	0.737257	5.82803e-06			Protein of unknown function DUF761, plant domain containing protein.	0
Os08g0188151	0.737095	0.00011876			Hypothetical gene.	0
Os01g0134500	0.736399	7.55135e-06	OsSTE1, OsDWF7	0	Similar to Delta-7-sterol-C5(6)-desaturase (EC 1.3.3.-) (Delta-7-C-5 sterol desaturase) (Delta7-sterol-C5-desaturase).	Biological Process: fatty acid biosynthetic process (GO:0006633), Biological Process: oxidation-reduction process (GO:0055114), Molecular Function: iron ion binding (GO:0005506), Molecular Function: oxidoreductase activity (GO:0016491)
Os08g0308700	0.735803	1.01703e-05	Cen8.t00793	0	Similar to DCL protein.	Biological Process: amine metabolic process (GO:0009308), Molecular Function: copper ion binding (GO:0005507), Molecular Function: quinone binding (GO:0048038)
Os01g0604100	0.735766	0.000150449			Conserved hypothetical protein.	0
Os08g0161700	0.735413	1.34589e-05			NADH dehydrogenase [ubiquinone] (complex I), iron-sulphur protein 6, mitochondria domain containing protein.	0
Os01g0640700	0.735237	0.000137842			Similar to vegetative cell wall protein gp1.	0
Os07g0168300	0.73461	0.00704562	OsGSTU11	TAU GLUTATHIONE S-TRANSFERASE 11	Similar to Glutathione S-transferase GSTU6.	Molecular Function: protein binding (GO:0005515)
Os06g0524400	0.734406	0.0001285	OsTBL49, TBL49	0	Protein of unknown function DUF231, plant domain containing protein.	0
Os09g0506450	0.734046	0.000912152	OsFbox497, Os_F0433	0	Similar to F-box domain containing protein, expressed.	0
Os05g0477900	0.733717	0.006415	OsLTP1.4, OsLtpI.4	0	Similar to nonspecific lipid-transfer protein.	Biological Process: lipid transport (GO:0006869), Molecular Function: lipid binding (GO:0008289)
Os01g0126600	0.733524	0.000901784			Similar to X1 (Fragment).	0
Os01g0964133	0.733433	4.42619e-06			Similar to Actin.	Molecular Function: ATP binding (GO:0005524)
Os03g0108700	0.732913	4.59543e-05			Conserved hypothetical protein.	0
Os02g0115600	0.732898	0.00126707			S1, RNA binding domain containing protein.	Molecular Function: RNA binding (GO:0003723)
Os03g0194500	0.732355	0.00494776			Similar to Protein translocase/ protein transporter.	0
Os03g0852700	0.732276	8.36946e-05			Pentatricopeptide repeat domain containing protein.	Molecular Function: binding (GO:0005488)
Os04g0488600	0.731745	1.62431e-05			Uncharacterised protein family Ycf20 domain containing protein.	0
Os03g0701700	0.731587	1.2412e-05	OS-ERS1, OsERS1, OsERS1a, OsERS1b, OSERS	0	Similar to Ethylene receptor.	Biological Process: signal transduction (GO:0007165), Biological Process: phosphorylation (GO:0016310), Biological Process: peptidyl-histidine phosphorylation (GO:0018106), Cellular Component: membrane (GO:0016020), Molecular Function: two-component sensor activity (GO:0000155), Molecular Function: protein histidine kinase activity (GO:0004673), Molecular Function: signal transducer activity (GO:…
Os03g0860600	0.730904	0.000721787			Similar to 2-oxoglutarate-dependent oxygenase.	Biological Process: oxidation-reduction process (GO:0055114), Molecular Function: oxidoreductase activity (GO:0016491), Molecular Function: oxidoreductase activity, acting on paired donors, with incorporation or reduction of molecular oxygen, 2-oxoglutarate as one donor, and incorporation of one atom each of oxygen into both donors (GO:0016706)
Os01g0776700	0.730595	3.09777e-06			Similar to predicted protein.	0
Os02g0614200	0.730372	6.37687e-08			Conserved hypothetical protein.	0
Os02g0651300	0.728391	1.54114e-09			Similar to OR.	Molecular Function: heat shock protein binding (GO:0031072), Molecular Function: unfolded protein binding (GO:0051082)
Os04g0553000	0.727775	0.000647031	OsABCI10, OsABCI10_1, OsABCI10_2	ABC TRANSPORTER I FAMILY MEMBER 10	Similar to OSIGBa0143N19.6 protein.	0
Os01g0688200	0.72713	0.000104891			Similar to hydrolase, alpha/beta fold family protein.	0
Os01g0511600	0.726941	0.0021865			Similar to lrgB-like family protein.	0
Os02g0624400	0.726498	0.000102355			Glycosyl transferase, family 8 protein.	Molecular Function: transferase activity, transferring glycosyl groups (GO:0016757)
Os01g0346700	0.726101	5.20443e-05			Conserved hypothetical protein.	0
Os12g0552500	0.725784	0.00209447			Rossmann-like alpha/beta/alpha sandwich fold domain containing protein.	Biological Process: response to stress (GO:0006950)
Os01g0542700	0.725419	0.000848527	OsbZIP04, OsbZIP4	b-ZIP TRANSCRIPTION FACTOR 4	bZIP transcription factor, bZIP-1 domain containing protein.	Biological Process: regulation of transcription, DNA-dependent (GO:0006355), Molecular Function: sequence-specific DNA binding transcription factor activity (GO:0003700), Molecular Function: sequence-specific DNA binding (GO:0043565), Molecular Function: protein dimerization activity (GO:0046983)
Os07g0546000	0.724596	0.00136161	IPI, ipi	0	Similar to Isopentenyl pyrophosphate:dimethyllallyl pyrophosphate isomerase (EC 5.3.3.2) (Fragment).	Biological Process: isoprenoid biosynthetic process (GO:0008299), Molecular Function: isopentenyl-diphosphate delta-isomerase activity (GO:0004452), Molecular Function: hydrolase activity (GO:0016787)
Os01g0268900	0.724548	0.000489142			Conserved hypothetical protein.	0
Os04g0397400	0.723678	9.89264e-05			Conserved hypothetical protein.	0
Os02g0817600	0.723601	2.76472e-11			AUX/IAA protein family protein.	Biological Process: regulation of transcription, DNA-dependent (GO:0006355), Cellular Component: nucleus (GO:0005634), Molecular Function: protein dimerization activity (GO:0046983)
Os12g0170300	0.72352	2.41746e-05			Similar to Sodium Bile acid symporter family protein, expressed.	Biological Process: sodium ion transport (GO:0006814), Cellular Component: membrane (GO:0016020), Molecular Function: bile acid:sodium symporter activity (GO:0008508)
Os06g0695600	0.722969	1.48182e-08	OsRFP	0	RING E3 ligase, Negative regulator for salt-stress response	0
Os09g0346500	0.722818	0.00345658	cab1R, LHCP, CAB, OsLhcb1, Lhcb1, Cab1	CHLOROPHYLL A/B BINDING PROTEIN 1R	Similar to Chlorophyll a-b binding protein, chloroplast precursor (LHCII type I CAB) (LHCP).	Biological Process: photosynthesis, light harvesting (GO:0009765), Cellular Component: membrane (GO:0016020)
Os06g0188800	0.722751	0.00480071	OsGLR4.4	0	Extracellular solute-binding protein, family 3 domain containing protein.	Biological Process: transport (GO:0006810), Cellular Component: outer membrane-bounded periplasmic space (GO:0030288), Molecular Function: transporter activity (GO:0005215)
Os01g0106800	0.722431	7.17455e-06	OsRBX1b, RBX1b	0	Similar to RING-box protein 1A (Regulator of cullins 1a) (dRbx1).	Molecular Function: protein binding (GO:0005515), Molecular Function: zinc ion binding (GO:0008270)
Os10g0514400	0.721747	0.00816776			Similar to Cytochrome P450 family protein.	0
Os02g0711400	0.721721	0.00224006			Conserved hypothetical protein.	0
Os02g0828200	0.721265	3.92619e-09			TPR-like domain containing protein.	Molecular Function: binding (GO:0005488)
Os03g0360700	0.721054	2.79897e-06	OsMSR1, MSR1, OsMSRB5, MSRB5	0	Similar to Protein-methionine-S-oxide reductase, PilB family.	Biological Process: oxidation-reduction process (GO:0055114), Molecular Function: peptide-methionine-(S)-S-oxide reductase activity (GO:0008113)
Os06g0502900	0.720943	8.0061e-09			Similar to DGCR14 protein.	0
Os04g0525000	0.720884	2.85984e-05			Protein of unknown function DUF177 domain containing protein.	0
Os06g0714700	0.720492	0.000910171			Conserved hypothetical protein.	0
Os03g0132250	0.720241	0.00494131			Hypothetical protein.	0
Os05g0116100	0.71964	8.77938e-05	OsDHAR1, DHAR, cytDHAR, OsDHAR	DEHYDROASCORBATE REDUCTASE 1	Dehydroascorbate reductase.	Molecular Function: protein binding (GO:0005515)
Os01g0911000	0.719416	0.000254243			Sas10/Utp3/C1D domain containing protein.	0
Os08g0363800	0.719246	0.00555267			Similar to protein aq_1857.	Biological Process: iron-sulfur cluster assembly (GO:0016226), Molecular Function: structural molecule activity (GO:0005198), Molecular Function: iron-sulfur cluster binding (GO:0051536)
Os06g0663400	0.719132	1.15362e-05	OsDPK3	0	Serine/thronine protein kinase-like protein.	Biological Process: protein phosphorylation (GO:0006468), Molecular Function: protein kinase activity (GO:0004672), Molecular Function: protein serine/threonine kinase activity (GO:0004674), Molecular Function: ATP binding (GO:0005524), Molecular Function: transferase activity, transferring phosphorus-containing groups (GO:0016772)
Os10g0515200	0.71877	0.000661694			Cytochrome P450 family protein.	Biological Process: oxidation-reduction process (GO:0055114), Molecular Function: iron ion binding (GO:0005506), Molecular Function: electron carrier activity (GO:0009055), Molecular Function: oxidoreductase activity, acting on paired donors, with incorporation or reduction of molecular oxygen (GO:0016705), Molecular Function: heme binding (GO:0020037)
Os05g0569200	0.718215	0.00177532			Protein of unknown function DUF3143 domain containing protein.	0
Os05g0526200	0.718206	2.59231e-07			Similar to Calcium homeostasis regulator CHoR1.	0
Os02g0671200	0.717822	8.91087e-05	Os_F0676	0	Protein of unknown function DUF295 domain containing protein.	0
Os06g0645700	0.717762	1.0287e-05	OsHAF701	HISTONE ACETYLTRANSFERASE HAF701	Similar to HAF1.	Molecular Function: protein binding (GO:0005515)
Os05g0393100	0.717064	6.41625e-06			Leucine-rich repeat, N-terminal domain containing protein.	0
Os06g0172800	0.716637	0.000450119	0	0	Similar to alkaline alpha galactosidase 2.	Biological Process: metabolic process (GO:0008152), Molecular Function: catalytic activity (GO:0003824)
Os02g0565000	0.715576	2.35594e-05			Homeodomain-like containing protein.	0
Os02g0577400	0.715118	0.000817298			Hypothetical protein.	0
Os02g0609500	0.713688	0.000339794			Hypothetical protein.	0
Os03g0342900	0.712714	2.51991e-09			Dormancyauxin associated family protein.	0
Os01g0618200	0.71254	3.61631e-06	OsPP2C07, PP2C07, OsPP2C7, PP2C7, OsPP11	0	Protein phosphatase 2C family protein.	Biological Process: protein dephosphorylation (GO:0006470), Cellular Component: protein serine/threonine phosphatase complex (GO:0008287), Molecular Function: catalytic activity (GO:0003824), Molecular Function: protein serine/threonine phosphatase activity (GO:0004722)
Os03g0851200	0.712166	6.63038e-05	OsGRX11	GLUTAREDOXIN 11	Similar to CAXIP1 protein.	Biological Process: cell redox homeostasis (GO:0045454), Molecular Function: electron carrier activity (GO:0009055), Molecular Function: protein disulfide oxidoreductase activity (GO:0015035)
Os11g0448400	0.712018	0.000286557	OsSIG2A, OsSig2A	SIGMA FACTOR 2A	RNA polymerase sigma factor, region 2 domain containing protein.	Biological Process: transcription initiation, DNA-dependent (GO:0006352), Biological Process: regulation of transcription, DNA-dependent (GO:0006355), Molecular Function: DNA binding (GO:0003677), Molecular Function: sequence-specific DNA binding transcription factor activity (GO:0003700), Molecular Function: sigma factor activity (GO:0016987)
Os01g0781000	0.712002	4.16732e-05			Vacuolar protein sorting-associated, VPS28 family protein.	0
Os11g0684000	0.710598	0.00115016	OsJAmyb, JAmyb	0	Similar to Transcription factor MYB21 (Myb-related protein 21) (AtMYB21) (Myb homolog 3) (AtMyb3).	Biological Process: regulation of transcription, DNA-dependent (GO:0006355), Molecular Function: DNA binding (GO:0003677), Molecular Function: protein binding (GO:0005515)
Os04g0460900	0.710167	1.05856e-05			Non-protein coding transcript.	0
Os02g0817500	0.710004	1.33245e-05	KOB1	0	Potassium channel, voltage-dependent, beta subunit, KCNAB-related domain containing protein.	Biological Process: potassium ion transport (GO:0006813), Biological Process: transmembrane transport (GO:0055085)
Os06g0646000	0.709973	1.48688e-09			Methyltransferase type 11 domain containing protein.	Biological Process: metabolic process (GO:0008152), Molecular Function: methyltransferase activity (GO:0008168)
Os10g0545100	0.709349	0.000164166			Similar to predicted protein.	0
Os05g0296530	0.708157	0.00292151			Non-protein coding transcript.	0
Os05g0550000	0.707129	1.12193e-07	OsRFPH2-20	0	Similar to protein binding protein.	Molecular Function: protein binding (GO:0005515), Molecular Function: zinc ion binding (GO:0008270)
Os06g0152800	0.706558	0.00017951			Conserved hypothetical protein.	0
Os01g0708400	0.706319	4.24997e-06			Non-protein coding transcript.	0
Os08g0549300	0.706311	0.00156518	0	0	Similar to Acyl carrier protein III, chloroplast precursor (ACP III).	Biological Process: fatty acid biosynthetic process (GO:0006633), Molecular Function: acyl carrier activity (GO:0000036), Molecular Function: phosphopantetheine binding (GO:0031177), Molecular Function: cofactor binding (GO:0048037)
Os02g0190000	0.70565	0.00106566			Putative uncharacterized protein.	Biological Process: transport (GO:0006810), Biological Process: transmembrane transport (GO:0055085), Cellular Component: integral to membrane (GO:0016021), Molecular Function: nucleotide binding (GO:0000166), Molecular Function: ATP binding (GO:0005524), Molecular Function: ATPase activity (GO:0016887), Molecular Function: nucleoside-triphosphatase activity (GO:0017111), Molecular Function: ATPa…
Os11g0475500	0.705375	0.000450249			Conserved hypothetical protein.	0
Os01g0256600	0.704373	0.00289832			Ribosomal protein L18/L5 domain containing protein.	Biological Process: translation (GO:0006412), Cellular Component: intracellular (GO:0005622), Cellular Component: ribosome (GO:0005840), Molecular Function: structural constituent of ribosome (GO:0003735)
Os01g0128300	0.704146	0.00130834			Similar to predicted protein.	0
Os10g0518150	0.704059	0.00189399			Non-protein coding transcript.	0
Os05g0100366	0.703412	1.6482e-05			Non-protein coding transcript.	0
Os08g0413500	0.703329	3.61152e-08			Hypothetical conserved gene.	0
Os04g0282400	0.70306	0.008357			Similar to FPF1 protein-like (RAA1).	0
Os03g0124300	0.702428	5.30345e-12			Similar to ATP binding protein.	0
Os10g0546600	0.702378	0.00550728	CYP97C2	CYTOCHROME P450 97C2	Similar to Chloroplast carotenoid epsilon-ring hydroxylase.	Biological Process: oxidation-reduction process (GO:0055114), Molecular Function: iron ion binding (GO:0005506), Molecular Function: electron carrier activity (GO:0009055), Molecular Function: oxidoreductase activity, acting on paired donors, with incorporation or reduction of molecular oxygen (GO:0016705), Molecular Function: heme binding (GO:0020037)
Os01g0615000	0.702359	0.00170963			Hypothetical protein.	0
Os06g0694500	0.702018	0.00275097	OsISC13	IRON-SULFUR CLUSTER PROTEIN 13	Similar to Nitrogen fixation like protein.	Biological Process: iron-sulfur cluster assembly (GO:0016226), Molecular Function: iron ion binding (GO:0005506), Molecular Function: iron-sulfur cluster binding (GO:0051536)
Os01g0924500	0.701745	0.00311515			Non-protein coding transcript.	0
Os02g0245100	0.701192	0.00164687	OsWD40-39	0	Similar to Peroxisomal targeting signal type 2 receptor.	Molecular Function: protein binding (GO:0005515)
Os11g0272800	0.701055	3.18033e-05			Similar to Ulp1 protease family, C-terminal catalytic domain containing protein, expressed.	0
Os09g0129301	0.700874	0.0085101			Non-protein coding transcript.	0
Os01g0853800	0.700754	1.96097e-06			C2 calcium-dependent membrane targeting domain containing protein.	Molecular Function: protein binding (GO:0005515)
Os06g0111500	0.700705	4.65755e-05	Os6PGDH1, Os6PGDH	0	Cytosolic 6-phosphogluconate dehydrogenase.	Biological Process: pentose-phosphate shunt (GO:0006098), Biological Process: oxidation-reduction process (GO:0055114), Molecular Function: nucleotide binding (GO:0000166), Molecular Function: phosphogluconate dehydrogenase (decarboxylating) activity (GO:0004616), Molecular Function: oxidoreductase activity (GO:0016491), Molecular Function: oxidoreductase activity, acting on the CH-OH group of do…
Os08g0387400	0.700663	0.00170198	OsGH9B13	_	Similar to Cellulase (Fragment).	Biological Process: carbohydrate metabolic process (GO:0005975), Molecular Function: catalytic activity (GO:0003824), Molecular Function: hydrolase activity, hydrolyzing O-glycosyl compounds (GO:0004553)
Os10g0130500	0.700398	0.000994396			Hypothetical protein.	0
Os08g0101700	0.700199	1.11519e-05			Similar to Cytochrome b561 (Fragment).	Cellular Component: integral to membrane (GO:0016021)
Os05g0548100	0.699633	0.000329603			Similar to VIP1 protein.	0
Os01g0384800	0.699623	0.00458599			Conserved hypothetical protein.	0
Os02g0704900	0.698795	5.08283e-06			Similar to Inorganic pyrophosphatase-like protein.	Biological Process: phosphate-containing compound metabolic process (GO:0006796), Cellular Component: cytoplasm (GO:0005737), Molecular Function: magnesium ion binding (GO:0000287), Molecular Function: inorganic diphosphatase activity (GO:0004427)
Os03g0313800	0.698673	0.00480538			Hypothetical conserved gene.	0
Os07g0556300	0.698081	0.0093891			Octicosapeptide/Phox/Bem1p domain containing protein.	Molecular Function: protein binding (GO:0005515)
Os10g0566700	0.697539	0.000371675			Chaperonin Cpn10 family protein.	Biological Process: protein folding (GO:0006457), Cellular Component: cytoplasm (GO:0005737)
Os03g0650850	0.697268	0.000188569			Non-protein coding transcript.	0
Os10g0147300	0.697041	1.94808e-05			Conserved hypothetical protein.	0
Os03g0817000	0.696211	0.000532145			Actin-binding WH2 domain containing protein.	Molecular Function: protein binding (GO:0005515)
Os03g0278900	0.695779	0.00428365			ATPase, F0 complex, subunit B/B', bacterial and chloroplast family protein.	Biological Process: ATP synthesis coupled proton transport (GO:0015986), Cellular Component: proton-transporting ATP synthase complex, coupling factor F(o) (GO:0045263), Molecular Function: DNA binding (GO:0003677), Molecular Function: hydrogen ion transmembrane transporter activity (GO:0015078)
Os03g0650900	0.694198	0.00426879	OsRFPHC-1, OsNLA2, NLA2	0	Ortholog of Arabidopsis NLA (AtNLA), RING-type E3 ubiquitin-ligase	0
Os08g0513600	0.69348	2.68886e-05			Hypothetical conserved gene.	0
Os07g0617000	0.693471	0.000500571	OsERF#065, OsERF065, OsERF65, AP2/EREBP#107, AP2/EREBP107	ETHYLENE RESPONSE FACTOR 65	Similar to Ethylene response factor 2.	Biological Process: regulation of transcription, DNA-dependent (GO:0006355), Molecular Function: DNA binding (GO:0003677), Molecular Function: sequence-specific DNA binding transcription factor activity (GO:0003700)
Os12g0183300	0.693206	0.000913911	RHL	0	Similar to 3'(2'), 5'-bisphosphate nucleotidase.	Molecular Function: inositol or phosphatidylinositol phosphatase activity (GO:0004437)
Os08g0546700	0.692332	0.00027823	OsRhmbd14, RHMBD14	0	Peptidase S54, rhomboid domain containing protein.	Biological Process: proteolysis (GO:0006508), Cellular Component: integral to membrane (GO:0016021), Molecular Function: serine-type endopeptidase activity (GO:0004252)
Os05g0147100	0.692093	4.95505e-06			Conserved hypothetical protein.	0
Os11g0121600	0.692049	0.00315624			Conserved hypothetical protein.	0
Os04g0108300	0.692049	8.03828e-06			Protein of unknown function DUF177 family protein.	0
Os03g0158300	0.691135	0.000239499			Glycoside hydrolase-type carbohydrate-binding domain containing protein.	Biological Process: carbohydrate metabolic process (GO:0005975), Molecular Function: catalytic activity (GO:0003824), Molecular Function: carbohydrate binding (GO:0030246)
Os03g0575500	0.690759	0.00079843			Conserved hypothetical protein.	0
Os01g0978500	0.690722	0.000199896			Conserved hypothetical protein.	0
Os04g0390000	0.690679	1.89345e-06			Similar to OSIGBa0096P03.7 protein.	Biological Process: tricarboxylic acid cycle (GO:0006099), Biological Process: metabolic process (GO:0008152), Biological Process: oxidation-reduction process (GO:0055114), Molecular Function: oxoglutarate dehydrogenase (succinyl-transferring) activity (GO:0004591), Molecular Function: oxidoreductase activity, acting on the aldehyde or oxo group of donors, disulfide as acceptor (GO:0016624), Mole…
Os02g0657700	0.690403	5.76964e-09			Uncharacterised conserved protein UCP012943 domain containing protein.	0
Os01g0180300	0.689678	0.000474971			Lipoprotein, type 6 family protein.	0
Os09g0401550	0.689309	1.4938e-05			Hypothetical gene.	0
Os11g0609600	0.689197	0.00102878	GF14h, OsGF14h, 14-3-3h	0	Similar to 14-3-3-like protein.	Molecular Function: protein domain specific binding (GO:0019904)
Os11g0150200	0.689182	0.000323595			Conserved hypothetical protein.	0
Os03g0818300	0.689062	3.22228e-05			Zinc finger, RING/FYVE/PHD-type domain containing protein.	Molecular Function: protein binding (GO:0005515), Molecular Function: zinc ion binding (GO:0008270)
Os03g0681750	0.688603	0.0016699			Hypothetical gene.	0
Os01g0269900	0.688592	0.00292089			Actin/actin-like family protein.	0
Os07g0249900	0.688438	0.000439824			Peptidase M20 family protein.	Biological Process: metabolic process (GO:0008152), Molecular Function: hydrolase activity (GO:0016787)
Os08g0476700	0.687546	0.00746775			Hypothetical gene.	0
Os07g0483400	0.687492	0.00018701			Protein of unknown function DUF2365 domain containing protein.	0
Os01g0229600	0.687042	0.00306973			Conserved hypothetical protein.	0
Os03g0756800	0.686988	7.42452e-06			Uncharacterised protein family UPF0139 domain containing protein.	0
Os05g0302600	0.686767	0.000144314			TRAM, LAG1 and CLN8 homology domain containing protein.	Cellular Component: integral to membrane (GO:0016021)
Os01g0828100	0.686596	1.25212e-06			Similar to Cinnamoyl-CoA reductase.	Biological Process: cellular metabolic process (GO:0044237), Molecular Function: nucleotide binding (GO:0000166), Molecular Function: catalytic activity (GO:0003824), Molecular Function: coenzyme binding (GO:0050662)
Os11g0471100	0.686453	0.000240976			Hypothetical gene.	0
Os07g0571300	0.686189	0.00582475			Hypothetical protein.	0
Os08g0338600	0.685748	0.000923271			Conserved hypothetical protein.	0
Os02g0192100	0.685583	9.85986e-05			Conserved hypothetical protein.	0
Os11g0434800	0.685514	0.00805631			Conserved hypothetical protein.	0
Os03g0110300	0.685111	0.000430024			Conserved hypothetical protein.	0
Os08g0266300	0.684986	0.00100276			Similar to predicted protein.	0
Os01g0687500	0.684791	0.000197958			Methionine tRNA Formyltransferase-like domain containing protein.	Biological Process: biosynthetic process (GO:0009058), Biological Process: conversion of methionyl-tRNA to N-formyl-methionyl-tRNA (GO:0071951), Molecular Function: catalytic activity (GO:0003824), Molecular Function: methionyl-tRNA formyltransferase activity (GO:0004479), Molecular Function: hydroxymethyl-, formyl- and related transferase activity (GO:0016742)
Os06g0687500	0.684274	1.87785e-07			Nucleotide-binding, alpha-beta plait domain containing protein.	Molecular Function: nucleotide binding (GO:0000166), Molecular Function: nucleic acid binding (GO:0003676)
Os05g0383100	0.68397	0.000576904			Clathrin adaptor, mu subunit domain containing protein.	Biological Process: transport (GO:0006810), Biological Process: intracellular protein transport (GO:0006886), Biological Process: vesicle-mediated transport (GO:0016192), Cellular Component: clathrin adaptor complex (GO:0030131), Molecular Function: protein binding (GO:0005515)
Os03g0187200	0.683899	0.00284298			Non-protein coding transcript.	0
Os01g0192000	0.683889	0.00913551	OsDOS, OsC3H2, C3H2, OsTZF2, OsCCCH-Zn-4	ZINC FINGER CCCH DOMAIN-CONTAINING PROTEIN 2	CCCH-type zinc finger protein, Negative regulator for leaf senescence	Molecular Function: metal ion binding (GO:0046872)
Os03g0210700	0.683569	1.28851e-08			Conserved hypothetical protein.	0
Os12g0233300	0.683169	8.85666e-09			Histidine triad (HIT) protein family protein.	Molecular Function: catalytic activity (GO:0003824)
Os03g0762900	0.683022	0.00439212			Protein of unknown function DUF566 family protein.	0
Os05g0500400	0.682901	0.00250052			Domain of unknown function DUF1995 domain containing protein.	0
Os06g0339500	0.681894	0.00511154			Similar to OSIGBa0137A06.2 protein.	0
Os01g0166800	0.681271	0.000255681			Similar to ETG1 (E2F TARGET GENE 1).	0
Os03g0656900	0.680903	0.00113867	v1, NUS1	NUS1 PROTEIN	Plastid RNA-binding protein, Regulation of chloroplast RNA metabolism, Early chloroplast development under cold stress	Biological Process: DNA-templated transcription, termination (GO:0006353), Biological Process: regulation of transcription, DNA-templated (GO:0006355), Molecular Function: RNA binding (GO:0003723)
Os11g0704600	0.680412	7.79232e-08			Similar to Beta-1, 3 glucanase precursor (EC 3.2.1.39).	Biological Process: carbohydrate metabolic process (GO:0005975), Molecular Function: catalytic activity (GO:0003824), Molecular Function: hydrolase activity, hydrolyzing O-glycosyl compounds (GO:0004553), Molecular Function: cation binding (GO:0043169)
Os05g0149500	0.68023	0.000352412			Similar to lipopolysaccharide-modifying protein.	0
Os02g0773500	0.680138	0.000936242			Protein of unknown function DUF3464 domain containing protein.	0
Os04g0657900	0.679927	0.00147319			Similar to Fortune-1.	0
Os06g0360300	0.679749	2.58317e-08			NAD(P)-binding domain containing protein.	Molecular Function: nucleotide binding (GO:0000166)
Os02g0633300	0.679676	0.00185065	OsYSL14, OsYs5	PROBABLE METAL-NICOTIANAMINE TRANSPORTER YSL14	EspB-like protein.	Biological Process: transmembrane transport (GO:0055085)
Os02g0744000	0.679602	0.00392589			Similar to NDF6 (NDH DEPENDENT FLOW 6).	0
Os07g0236700	0.679279	0.000329603			Zinc finger, Dof-type domain containing protein.	Biological Process: regulation of transcription, DNA-dependent (GO:0006355), Molecular Function: DNA binding (GO:0003677), Molecular Function: zinc ion binding (GO:0008270)
Os11g0524300	0.679185	0.000185898			Protein of unknown function DUF1001 family protein.	0
Os03g0206600	0.679017	0.00596035			Uncharacterised protein family UPF0497, trans-membrane plant domain containing protein.	0
Os09g0496250	0.678998	0.00275324			Conserved hypothetical protein.	0
Os04g0403300	0.678636	1.2927e-06			Similar to Alpha-amylase.	Biological Process: carbohydrate metabolic process (GO:0005975), Molecular Function: catalytic activity (GO:0003824), Molecular Function: alpha-amylase activity (GO:0004556), Molecular Function: calcium ion binding (GO:0005509), Molecular Function: cation binding (GO:0043169)
Os02g0611500	0.678466	0.00268033			Similar to Eukaryotic initiation factor-like protein.	Biological Process: RNA metabolic process (GO:0016070), Molecular Function: binding (GO:0005488), Molecular Function: protein binding (GO:0005515)
Os06g0708700	0.678429	0.000418574			Similar to Nodulin-like protein.	Cellular Component: membrane (GO:0016020)
Os03g0809100	0.678026	1.46566e-07			Major facilitator superfamily protein.	Biological Process: transmembrane transport (GO:0055085), Cellular Component: integral to membrane (GO:0016021)
Os06g0603600	0.678011	0.0014319	OsSPX1, SPX1	0	SPX domain-containing protein, Phosphate (Pi) homeostasis	0
Os03g0670000	0.677951	0.000617494			Domain of unknown function DUF1713, mitochondria domain containing protein.	0
Os01g0572300	0.677207	0.00217513	OsIDD11	_	Zinc finger, C2H2-type domain containing protein.	Cellular Component: intracellular (GO:0005622), Molecular Function: nucleic acid binding (GO:0003676), Molecular Function: zinc ion binding (GO:0008270)
Os01g0720200	0.677082	0.000229576			Non-protein coding transcript.	0
Os01g0837600	0.676744	0.00032614			Similar to plant-specific domain TIGR01589 family protein.	0
Os02g0643500	0.676683	1.32576e-06			Pentapeptide repeat containing protein.	0
Os08g0531300	0.67614	8.50941e-06			DHBP synthase RibB-like alpha/beta domain domain containing protein.	0
Os06g0484600	0.675487	0.000281416			Similar to Pherophorin-S precursor.	0
Os03g0161500	0.675018	1.94118e-05			EGF domain containing protein.	Molecular Function: protein binding (GO:0005515)
Os07g0593332	0.674736	0.00195083			Similar to MFP1 attachment factor 1.	0
Os01g0382700	0.674722	0.000464522			Similar to stress regulated protein.	0
Os01g0858900	0.674296	0.00278278			Glycosyl transferase, family 29 protein.	Biological Process: protein glycosylation (GO:0006486), Cellular Component: integral to Golgi membrane (GO:0030173), Molecular Function: sialyltransferase activity (GO:0008373)
Os08g0179900	0.674274	6.05588e-09			Uncharacterised conserved protein UCP012943 domain containing protein.	0
Os01g0372700	0.67403	1.08675e-05			Similar to Asparaginyl-tRNA synthetase, cytoplasmic 1 (EC 6.1.1.22) (Asparagine-- tRNA ligase 1) (AsnRS 1).	Biological Process: tRNA aminoacylation for protein translation (GO:0006418), Biological Process: asparaginyl-tRNA aminoacylation (GO:0006421), Cellular Component: cytoplasm (GO:0005737), Molecular Function: nucleotide binding (GO:0000166), Molecular Function: nucleic acid binding (GO:0003676), Molecular Function: aminoacyl-tRNA ligase activity (GO:0004812), Molecular Function: asparagine-tRNA li…
Os06g0320000	0.673995	0.00539528			Thioredoxin fold domain containing protein.	0
Os07g0294650	0.67146	0.00147945			Non-protein coding transcript.	0
Os02g0178100	0.671369	0.00113532	OsBBX3, OsF, OsCCT05	0	Similar to CONSTANS-like protein CO6.	Cellular Component: intracellular (GO:0005622), Molecular Function: protein binding (GO:0005515), Molecular Function: zinc ion binding (GO:0008270)
Os01g0975300	0.670987	7.40742e-13	OsMYB48, OsMYB48-1, OsMYB48-2	0	MYB-related transcription factor, Drought and salinity tolerance	Molecular Function: DNA binding (GO:0003677)
Os02g0200900	0.670699	2.72908e-15	OsFbox072, OsFbox72, Os_F0508	0	Hypothetical conserved gene.	Molecular Function: protein binding (GO:0005515)
Os06g0143600	0.67058	4.25591e-05			Similar to PRP38 pre-mRNA processing factor 38 domain containing B.	0
Os03g0390600	0.670545	3.9924e-08	0	0	Similar to Histone H3 (Fragment).	Biological Process: nucleosome assembly (GO:0006334), Cellular Component: nucleosome (GO:0000786), Molecular Function: DNA binding (GO:0003677)
Os02g0160000	0.670532	0.000566906			Similar to Kluyveromyces lactis strain NRRL Y-1140 chromosome B of strain NRRL Y- 1140 of Kluyveromyces lactis.	Molecular Function: ATP binding (GO:0005524), Molecular Function: hydrolase activity, acting on acid anhydrides, in phosphorus-containing anhydrides (GO:0016818)
Os01g0856800	0.669938	1.79252e-06			Similar to pleckstrin homology domain-containing protein 1.	Molecular Function: protein binding (GO:0005515)
Os07g0673200	0.669913	3.95363e-06	OsRFPHC-13, OsNLA, NAL, OsNLA1, NAL1	0	RING-type E3 ubiquitin-ligase, Maintenance of phosphate homeostasis via degradation of phosphate transporters	0
Os03g0203200	0.669753	0.00495407	d14(d10), dwf13, d10, d14, D88, HTD2, OsD14, qPPB3, D88/D14, HTD4	0	Alpha/beta hydrolase, Strigolactone receptor, Strigolactone perception, Reguration of shoot branching	0
Os01g0393000	0.669429	0.00141806			Conserved hypothetical protein.	0
Os01g0271400	0.669419	2.44806e-07	OsClpR4, ClpR4, OsClp1, CLP1	CHLOROPLAST PROTEASE R4	Peptidase S14, ClpP family protein.	Biological Process: proteolysis (GO:0006508), Molecular Function: serine-type endopeptidase activity (GO:0004252)
Os12g0510500	0.66935	0.00471914			Conserved hypothetical protein.	0
Os03g0718100	0.669222	0.00716849	act1, AC1, RAC1, RAc1, ACT11, OsACT1	ACTIN 1	Actin 1.	Molecular Function: ATP binding (GO:0005524)
Os05g0555300	0.66877	6.31839e-05	0	0	Similar to electron carrier/ electron transporter/ iron ion binding protein.	Molecular Function: electron carrier activity (GO:0009055), Molecular Function: iron-sulfur cluster binding (GO:0051536)
Os03g0414400	0.668488	1.77487e-05			Conserved hypothetical protein.	0
Os07g0548300	0.668395	0.00190617			Hypothetical conserved gene.	Molecular Function: binding (GO:0005488)
Os02g0610800	0.668095	1.76353e-07			Protein of unknown function DUF1092 family protein.	0
Os03g0231600	0.667957	0.00378579			Similar to Branched-chain-amino-acid aminotransferase 3, chloroplast precursor (EC 2.6.1.42) (Atbcat-3).	Biological Process: metabolic process (GO:0008152), Biological Process: branched chain family amino acid metabolic process (GO:0009081), Molecular Function: catalytic activity (GO:0003824), Molecular Function: branched-chain-amino-acid transaminase activity (GO:0004084)
Os04g0606700	0.667652	1.73799e-05			Similar to OSIGBa0113I13.5 protein.	0
Os04g0387300	0.667309	0.00969638			Similar to OSIGBa0075F02.1 protein.	Molecular Function: DNA binding (GO:0003677), Molecular Function: protein dimerization activity (GO:0046983)
Os10g0445600	0.667303	0.00260745			Conserved hypothetical protein.	0
Os07g0176900	0.667216	0.000418075			Similar to Ribose-5-phosphate isomerase precursor (EC 5.3.1.6).	Biological Process: pentose-phosphate shunt, non-oxidative branch (GO:0009052), Molecular Function: ribose-5-phosphate isomerase activity (GO:0004751)
Os06g0667100	0.666755	1.41403e-06	OsHAP5B, NF-YC, CBF-C, OsNF-YC4, Os-NF-YC4, NF-YC4, NFYC4, OsNF-YC4-3, NF-YC4-3	HAP5B SUBUNIT OF CCAAT-BOX BINDING COMPLEX	Similar to Nuclear Y/CCAAT-box binding factor C subunit NF-YC.	Cellular Component: intracellular (GO:0005622), Molecular Function: DNA binding (GO:0003677), Molecular Function: sequence-specific DNA binding (GO:0043565)
Os01g0919900	0.666696	0.000274434	OsSSI2	0	Similar to Acyl-[acyl-carrier-protein] desaturase, chloroplast precursor (EC 1.14.19.2) (Stearoyl-ACP desaturase) (Delta(9) stearoyl-acyl carrier protein desaturase).	Biological Process: fatty acid metabolic process (GO:0006631), Biological Process: oxidation-reduction process (GO:0055114), Molecular Function: oxidoreductase activity (GO:0016491), Molecular Function: acyl-[acyl-carrier-protein] desaturase activity (GO:0045300), Molecular Function: transition metal ion binding (GO:0046914)
Os08g0120500	0.666241	3.98499e-10			Similar to Topoisomerase-like protein.	Molecular Function: binding (GO:0005488)
Os08g0521800	0.666165	5.64163e-05			Protein of unknown function DUF1997 domain containing protein.	0
Os06g0724400	0.666129	2.35594e-05	OsDNLZ1, DNLZ1	0	Zinc finger, Zim17-type family protein.	Molecular Function: zinc ion binding (GO:0008270)
Os01g0864700	0.665962	0.00659159	OsNek5	0	Similar to Serine/threonine-protein kinase Nek5.	0
Os02g0503400	0.665653	3.73723e-05	OsRPL35	RIBOSOMAL PROTEIN L35	Similar to 60S ribosomal protein L35.	Biological Process: translation (GO:0006412), Cellular Component: intracellular (GO:0005622), Cellular Component: ribosome (GO:0005840), Molecular Function: structural constituent of ribosome (GO:0003735)
Os06g0219800	0.665607	0.00502998			Similar to Protein phosphatase 2A, regulatory subunit B' (PP2A, subunit B', PR53 isoform) (Phosphotyrosyl phosphatase activator) (PTPA). Splice isoform 3.	0
Os02g0572900	0.665507	0.000315851			Zinc finger, C2H2-type domain containing protein.	Cellular Component: intracellular (GO:0005622), Molecular Function: nucleic acid binding (GO:0003676), Molecular Function: zinc ion binding (GO:0008270)
Os06g0326400	0.665134	0.00234723			Phosphofructokinase domain containing protein.	Biological Process: glycolysis (GO:0006096), Cellular Component: 6-phosphofructokinase complex (GO:0005945), Molecular Function: 6-phosphofructokinase activity (GO:0003872), Molecular Function: ATP binding (GO:0005524), Molecular Function: diphosphate-fructose-6-phosphate 1-phosphotransferase activity (GO:0047334)
Os02g0553200	0.665033	0.00499009	OsAPx8, OsAPx08, OSAPX8, APx8, OsAPX8	ASCORBATE PEROXIDASE 8	Thylakoid membrane-bound ascorbate peroxidase, Tolerance to bacterial blight, Response to NaCl	Biological Process: response to oxidative stress (GO:0006979), Biological Process: oxidation-reduction process (GO:0055114), Molecular Function: peroxidase activity (GO:0004601), Molecular Function: heme binding (GO:0020037)
Os05g0518600	0.664938	1.90883e-06	OsTPS1	TREHALOSE-6-PHOSPHATE SYNTHASE 1	Similar to SL-TPS/P.	Biological Process: trehalose biosynthetic process (GO:0005992), Molecular Function: catalytic activity (GO:0003824)
Os03g0399466	0.664719	0.00221075			Non-protein coding transcript.	0
Os02g0170500	0.664472	4.21252e-06	OsHAP5A, NF-YC, CBF-C, OsNF-YC1, Os-NF-YC1, NF-YC1, NFYC1, OsNF-YC4-2, NF-YC4-2	HAP5A SUBUNIT OF CCAAT-BOX BINDING COMPLEX	Histone-fold domain containing protein.	Cellular Component: intracellular (GO:0005622), Molecular Function: DNA binding (GO:0003677), Molecular Function: sequence-specific DNA binding (GO:0043565)
Os01g0278900	0.664019	0.00298519			Similar to 50S ribosomal protein L40.	0
Os01g0769100	0.663988	0.000450589			Non-protein coding transcript.	0
Os10g0525000	0.663983	1.3593e-08			Cytochrome P450 family protein.	Biological Process: oxidation-reduction process (GO:0055114), Molecular Function: iron ion binding (GO:0005506), Molecular Function: electron carrier activity (GO:0009055), Molecular Function: oxidoreductase activity, acting on paired donors, with incorporation or reduction of molecular oxygen (GO:0016705), Molecular Function: heme binding (GO:0020037)
Os08g0260000	0.663682	0.000268552			Similar to N-acetyltransferase.	0
Os08g0378900	0.663677	0.0005717			Similar to Thioredoxin protein.	Biological Process: glycerol ether metabolic process (GO:0006662), Biological Process: cell redox homeostasis (GO:0045454), Molecular Function: electron carrier activity (GO:0009055), Molecular Function: protein disulfide oxidoreductase activity (GO:0015035)
Os05g0122900	0.663618	5.01913e-07	OsBLE1	0	BLE1 protein.	0
Os03g0431100	0.663496	9.89264e-05			Conserved hypothetical protein.	0
Os03g0271100	0.663042	0.000172017	OsSIG2B	SIGMA FACTOR 2B	Similar to Sigma factor SIG2B.	Biological Process: transcription initiation, DNA-dependent (GO:0006352), Biological Process: regulation of transcription, DNA-dependent (GO:0006355), Molecular Function: DNA binding (GO:0003677), Molecular Function: sequence-specific DNA binding transcription factor activity (GO:0003700), Molecular Function: sigma factor activity (GO:0016987)
Os01g0898800	0.663032	5.67346e-06			Protein of unknown function DUF1685 domain containing protein.	0
Os02g0465000	0.662727	0.00022548			Similar to DNA repair protein RAD23.	Molecular Function: protein binding (GO:0005515)
Os01g0776300	0.662407	0.00824029			Protein of unknown function DUF26 domain containing protein.	0
Os08g0103000	0.662212	3.22198e-05			Similar to serine/threonine-protein kinase CTR1.	Biological Process: metabolic process (GO:0008152), Molecular Function: amino acid binding (GO:0016597), Molecular Function: transferase activity, transferring phosphorus-containing groups (GO:0016772)
Os08g0502700	0.662192	1.46849e-05			Pyridoxal phosphate-dependent transferase, major region, subdomain 1 domain containing protein.	Biological Process: metabolic process (GO:0008152), Molecular Function: catalytic activity (GO:0003824), Molecular Function: pyridoxal phosphate binding (GO:0030170)
Os08g0159000	0.661857	9.8222e-05			Similar to DnaJ homolog subfamily C member 1.	Biological Process: regulation of transcription, DNA-dependent (GO:0006355), Molecular Function: DNA binding (GO:0003677), Molecular Function: protein binding (GO:0005515)
Os01g0135600	0.6617	0.00243066			Conserved hypothetical protein.	0
Os04g0117100	0.661216	6.89857e-05			ATPase, F0 complex, subunit E, mitochondrial domain containing protein.	Biological Process: ATP synthesis coupled proton transport (GO:0015986), Cellular Component: mitochondrial proton-transporting ATP synthase complex, coupling factor F(o) (GO:0000276), Molecular Function: hydrogen ion transmembrane transporter activity (GO:0015078)
Os04g0113800	0.66112	0.00241636			Hypothetical conserved gene.	0
Os02g0178400	0.660924	0.00042189			Protein transport protein SEC61 gamma subunit.	Biological Process: protein targeting (GO:0006605), Biological Process: intracellular protein transport (GO:0006886), Biological Process: protein transport (GO:0015031), Cellular Component: membrane (GO:0016020), Molecular Function: P-P-bond-hydrolysis-driven protein transmembrane transporter activity (GO:0015450)
Os04g0516600	0.660826	0.00228212			Pyridoxal phosphate-dependent transferase, major region, subdomain 1 domain containing protein.	Biological Process: cellular amino acid metabolic process (GO:0006520), Molecular Function: catalytic activity (GO:0003824), Molecular Function: lyase activity (GO:0016829), Molecular Function: pyridoxal phosphate binding (GO:0030170)
Os09g0410400	0.660461	3.73723e-05			Zinc finger, RING-type domain containing protein.	Molecular Function: protein binding (GO:0005515), Molecular Function: zinc ion binding (GO:0008270)
Os03g0407000	0.659828	0.000340394			von Willebrand factor, type A domain containing protein.	Molecular Function: protein binding (GO:0005515)
Os09g0392666	0.659704	0.000915803			Conserved hypothetical protein.	0
Os01g0767000	0.659541	2.41443e-06			Similar to Nuclear matrix constituent-like protein (Fragment).	0
Os04g0105700	0.659503	8.33659e-05			Similar to B0616E02-H0507E05.5 protein.	0
Os10g0551600	0.658115	0.00109663			Conserved hypothetical protein.	0
Os12g0573200	0.657608	4.66784e-07			GRAS transcription factor domain containing protein.	0
Os02g0244700	0.657269	0.000284726	PEPC-1, Osppc1, ppc1	0	Similar to Phosphoenolpyruvate carboxylase 1 (EC 4.1.1.31) (PEPCase 1) (CP21).	Biological Process: tricarboxylic acid cycle (GO:0006099), Biological Process: carbon fixation (GO:0015977), Molecular Function: catalytic activity (GO:0003824), Molecular Function: phosphoenolpyruvate carboxylase activity (GO:0008964)
Os08g0564500	0.657133	0.000805695			Zinc finger, U1-type domain containing protein.	Cellular Component: intracellular (GO:0005622), Cellular Component: nucleus (GO:0005634), Molecular Function: nucleic acid binding (GO:0003676), Molecular Function: zinc ion binding (GO:0008270)
Os04g0535600	0.657038	0.000352048	OSINV2, OsINV2, OsVIN1	0	Similar to Beta-fructofuranosidase 1 precursor (EC 3.2.1.26) (Sucrose 1) (Invertase 1).	Biological Process: carbohydrate metabolic process (GO:0005975), Molecular Function: hydrolase activity, hydrolyzing O-glycosyl compounds (GO:0004553), Molecular Function: beta-fructofuranosidase activity (GO:0004564), Molecular Function: sucrose alpha-glucosidase activity (GO:0004575)
Os02g0683900	0.656973	0.00188236			Protein of unknown function DUF1084 family protein.	0
Os03g0807000	0.655798	0.000206629			Conserved hypothetical protein.	0
Os04g0453200	0.655298	0.00197824			Similar to Monosaccharide transporter 1.	Biological Process: transport (GO:0006810), Biological Process: transmembrane transport (GO:0055085), Cellular Component: membrane (GO:0016020), Cellular Component: integral to membrane (GO:0016021), Molecular Function: transporter activity (GO:0005215), Molecular Function: transmembrane transporter activity (GO:0022857), Molecular Function: substrate-specific transmembrane transporter activity (…
Os07g0213300	0.654278	0.00259482			Pentatricopeptide repeat domain containing protein.	Molecular Function: binding (GO:0005488)
Os02g0734900	0.654084	3.62235e-05			Similar to Erwinia induced protein 2.	Biological Process: intracellular protein transport (GO:0006886), Cellular Component: endoplasmic reticulum (GO:0005783), Cellular Component: integral to membrane (GO:0016021)
Os06g0731400	0.654024	5.49829e-07			Hypothetical conserved gene.	0
Os02g0678400	0.653523	6.37125e-06			NAD(P)-binding domain containing protein.	Biological Process: extracellular polysaccharide biosynthetic process (GO:0045226), Molecular Function: nucleotide binding (GO:0000166), Molecular Function: dTDP-4-dehydrorhamnose reductase activity (GO:0008831)
Os02g0677600	0.653366	9.49901e-05			Conserved hypothetical protein.	0
Os02g0226350	0.653164	0.000567338			Non-protein coding transcript.	0
Os06g0183700	0.653006	0.00101627			Hypothetical conserved gene.	0
Os08g0242800	0.652412	2.9176e-08	OsSIG6, OsSig6	SIGMA FACTOR 6	Similar to Sigma factor SIG6.	Biological Process: transcription initiation, DNA-dependent (GO:0006352), Biological Process: regulation of transcription, DNA-dependent (GO:0006355), Molecular Function: DNA binding (GO:0003677), Molecular Function: sequence-specific DNA binding transcription factor activity (GO:0003700), Molecular Function: sigma factor activity (GO:0016987)
Os03g0687000	0.652178	1.48975e-06	OsNPF2.4, NPF2.4	0	Similar to predicted protein.	Biological Process: oligopeptide transport (GO:0006857), Cellular Component: membrane (GO:0016020), Molecular Function: transporter activity (GO:0005215)
Os03g0626200	0.652062	0.00900562			Conserved hypothetical protein.	0
Os03g0565200	0.651636	0.000117028			Haloacid dehalogenase-like hydrolase domain containing protein.	Biological Process: metabolic process (GO:0008152), Molecular Function: catalytic activity (GO:0003824), Molecular Function: hydrolase activity (GO:0016787)
Os01g0595400	0.65077	0.000584264			Protein of unknown function DUF538 family protein.	0
Os11g0425800	0.650343	2.75324e-06			Similar to 60S ribosomal protein L13a.	Biological Process: translation (GO:0006412), Cellular Component: ribosome (GO:0005840), Molecular Function: structural constituent of ribosome (GO:0003735)
Os05g0453500	0.650002	4.38258e-06			Guanylyl cyclase domain containing protein.	0
Os11g0216100	0.649323	0.00195921			Similar to Heat shock protein binding protein.	Biological Process: protein folding (GO:0006457), Molecular Function: heat shock protein binding (GO:0031072), Molecular Function: unfolded protein binding (GO:0051082)
Os08g0191100	0.649263	6.37247e-05	OsACO1, ACO1	0	Similar to Iron-responsive element binding protein (Fragment).	0
Os04g0382300	0.649135	8.24414e-05	OsCBSCBS3	_	Similar to SNF1-related protein kinase regulatory gamma subunit 1 (AKIN gamma1) (AKING1).	Biological Process: metabolic process (GO:0008152), Molecular Function: catalytic activity (GO:0003824), Molecular Function: protein binding (GO:0005515)
Os09g0513000	0.649083	6.81072e-05			Similar to TGB12K interacting protein 3.	Molecular Function: protein binding (GO:0005515)
Os01g0654100	0.648612	0.00749653			Similar to CTP synthase (EC 6.3.4.2) (UTP--ammonia ligase) (CTP synthetase).	Biological Process: pyrimidine nucleotide biosynthetic process (GO:0006221), Molecular Function: CTP synthase activity (GO:0003883)
Os02g0799600	0.648518	0.000558102			Conserved hypothetical protein.	0
Os03g0711500	0.647717	1.85297e-06	OsWD40-85	0	Similar to cDNA clone:J023075G08, full insert sequence.	Biological Process: intracellular protein transport (GO:0006886), Biological Process: vesicle-mediated transport (GO:0016192), Cellular Component: membrane coat (GO:0030117), Cellular Component: COPI vesicle coat (GO:0030126), Molecular Function: structural molecule activity (GO:0005198), Molecular Function: protein binding (GO:0005515)
Os12g0578400	0.647572	0.00310515			Glycoside hydrolase family 79, N-terminal protein.	Cellular Component: membrane (GO:0016020), Molecular Function: hydrolase activity, acting on glycosyl bonds (GO:0016798)
Os01g0513700	0.647423	1.20997e-05			Similar to trafficking protein particle complex subunit 1.	Biological Process: transport (GO:0006810), Biological Process: ER to Golgi vesicle-mediated transport (GO:0006888), Cellular Component: cis-Golgi network (GO:0005801)
Os07g0231400	0.647234	5.94905e-06	OsANT1	0	Similar to aromatic and neutral amino acid transporter.	0
Os09g0450700	0.647153	0.00136186			Conserved hypothetical protein.	0
Os03g0187600	0.646419	0.000121377			GRAM domain containing protein.	0
Os03g0830900	0.64607	6.97333e-06			Lipase, class 3 family protein.	Biological Process: lipid metabolic process (GO:0006629), Molecular Function: triglyceride lipase activity (GO:0004806)
Os11g0526200	0.645975	6.61398e-05			Similar to predicted protein.	0
Os07g0227750	0.64549	0.00161679			Hypothetical gene.	0
Os10g0484700	0.644759	0.000661468			Pyridoxal phosphate-dependent transferase, major region, subdomain 1 domain containing protein.	Biological Process: biosynthetic process (GO:0009058), Molecular Function: catalytic activity (GO:0003824), Molecular Function: transferase activity, transferring nitrogenous groups (GO:0016769), Molecular Function: pyridoxal phosphate binding (GO:0030170)
Os05g0429000	0.644428	1.85033e-05	OsSHM5, SHM5, OsSHMT5, SHMT5	0	Similar to Hydroxymethyltransferase.	Biological Process: glycine metabolic process (GO:0006544), Biological Process: L-serine metabolic process (GO:0006563), Molecular Function: catalytic activity (GO:0003824), Molecular Function: glycine hydroxymethyltransferase activity (GO:0004372), Molecular Function: pyridoxal phosphate binding (GO:0030170)
Os12g0550600	0.644327	0.000167191	qCTR12	0	Hypothetical protein.	0
Os02g0478600	0.644158	0.000152511			Similar to 40S ribosomal protein S15A.	Biological Process: translation (GO:0006412), Cellular Component: intracellular (GO:0005622), Cellular Component: ribosome (GO:0005840), Molecular Function: structural constituent of ribosome (GO:0003735)
Os08g0117100	0.64405	0.00307261			Nucleotide-binding, alpha-beta plait domain containing protein.	Molecular Function: nucleotide binding (GO:0000166), Molecular Function: nucleic acid binding (GO:0003676)
Os07g0163000	0.64399	0.000994396			Similar to FAD linked oxidase family protein.	Biological Process: oxidation-reduction process (GO:0055114), Molecular Function: catalytic activity (GO:0003824), Molecular Function: UDP-N-acetylmuramate dehydrogenase activity (GO:0008762), Molecular Function: oxidoreductase activity (GO:0016491), Molecular Function: oxidoreductase activity, acting on CH-OH group of donors (GO:0016614), Molecular Function: flavin adenine dinucleotide binding (…
Os07g0422000	0.64397	1.50161e-05	FLL2	0	Similar to predicted protein.	0
Os10g0524300	0.643109	0.00313007			LysM domain-containing protein, Embryo sac development	0
Os07g0258000	0.642709	0.000134688			Domain of unknown function DUF1618 domain containing protein.	0
Os03g0376600	0.642543	1.08663e-05			Similar to 29 kDa ribonucleoprotein, chloroplast precursor (RNA-binding protein cp29).	Molecular Function: nucleotide binding (GO:0000166), Molecular Function: nucleic acid binding (GO:0003676)
Os03g0711600	0.642144	0.00491677			Similar to DNA binding protein (Fragment).	Biological Process: nucleosome assembly (GO:0006334), Cellular Component: nucleosome (GO:0000786), Cellular Component: nucleus (GO:0005634), Molecular Function: DNA binding (GO:0003677)
Os10g0549500	0.641819	0.00148002			Similar to Branched-chain-amino-acid aminotransferase.	Biological Process: metabolic process (GO:0008152), Biological Process: branched chain family amino acid metabolic process (GO:0009081), Molecular Function: catalytic activity (GO:0003824), Molecular Function: branched-chain-amino-acid transaminase activity (GO:0004084)
Os07g0607200	0.641523	0.000517595			Protein of unknown function DUF751 family protein.	0
Os01g0626200	0.641364	1.28424e-05			Clathrin adaptor, beta-adaptin, appendage, C-terminal subdomain domain containing protein.	Biological Process: intracellular protein transport (GO:0006886), Biological Process: vesicle-mediated transport (GO:0016192), Cellular Component: clathrin adaptor complex (GO:0030131)
Os04g0692500	0.64091	8.03492e-06			Similar to antiporter/ drug transporter/ transporter.	Biological Process: drug transmembrane transport (GO:0006855), Biological Process: transmembrane transport (GO:0055085), Cellular Component: membrane (GO:0016020), Molecular Function: drug transmembrane transporter activity (GO:0015238), Molecular Function: antiporter activity (GO:0015297)
Os01g0682500	0.640632	1.73799e-05			Similar to Protein Kinase C630.09c.	0
Os02g0280000	0.640308	8.43701e-05			Hypothetical gene.	0
Os11g0153300	0.640229	0.00324795			Conserved hypothetical protein.	0
Os03g0681300	0.639894	2.81192e-05			Similar to SABRE.	0
Os01g0908200	0.639431	0.000364618	OsBT, BT	0	Member of the Bric-a-Brac/Tramtrack/Broad (BTB) family, BT1/BT2 ortholog, Negative regulation of nitrate uptake and nitrogen use efficiency	Biological Process: regulation of transcription, DNA-templated (GO:0006355), Molecular Function: transcription cofactor activity (GO:0003712), Molecular Function: histone acetyltransferase activity (GO:0004402), Molecular Function: protein binding (GO:0005515), Molecular Function: zinc ion binding (GO:0008270), Cellular Component: nucleus (GO:0005634)
Os01g0210500	0.639261	0.000182183			Similar to SOUL-like protein.	0
Os06g0472000	0.638734	5.59594e-11			Methionine sulphoxide reductase B domain containing protein.	Biological Process: oxidation-reduction process (GO:0055114), Molecular Function: peptide-methionine-(S)-S-oxide reductase activity (GO:0008113)
Os03g0775650	0.638644	0.00841128			Non-protein coding transcript.	0
Os05g0342900	0.638638	0.00018701			Tetratricopeptide-like helical domain containing protein.	Molecular Function: binding (GO:0005488)
Os03g0753600	0.638179	0.0073052			Conserved hypothetical protein.	0
Os06g0190500	0.638139	0.00169551	OsGLR4.7	0	Similar to Glutamate receptor.	Biological Process: transport (GO:0006810), Cellular Component: membrane (GO:0016020), Cellular Component: outer membrane-bounded periplasmic space (GO:0030288), Molecular Function: ionotropic glutamate receptor activity (GO:0004970), Molecular Function: transporter activity (GO:0005215), Molecular Function: extracellular-glutamate-gated ion channel activity (GO:0005234)
Os03g0408500	0.637465	1.32005e-06			Similar to Transcription initiation factor IID, 31kD subunit family protein, expressed.	Biological Process: transcription initiation, DNA-dependent (GO:0006352), Molecular Function: DNA binding (GO:0003677)
Os03g0693400	0.637282	0.0065785			Protein of unknown function DUF538 family protein.	0
Os08g0480500	0.637053	9.1052e-05			Similar to surfeit locus protein 5.	Biological Process: regulation of transcription from RNA polymerase II promoter (GO:0006357), Cellular Component: mediator complex (GO:0016592), Molecular Function: RNA polymerase II transcription cofactor activity (GO:0001104)
Os02g0580300	0.636838	1.12688e-07	gid2, GF14e, OsGF14e, OsGID2, 14-3-3e	GIBBERELLIN-INSENSITIVE DWARF PROTEIN 2	Similar to 14-3-3 protein 6.	Molecular Function: protein domain specific binding (GO:0019904)
Os08g0522500	0.63614	0.00309156			Glycoside hydrolase, family 19 protein.	0
Os10g0418300	0.636026	0.00954551			Hypothetical conserved gene.	0
Os02g0128100	0.636012	0.000949274			Hypothetical conserved gene.	0
Os12g0133100	0.635191	0.00633132	OsZIFL12	ZINC-INDUCED FACILITATOR-LIKE 12	Major facilitator superfamily protein.	Biological Process: transmembrane transport (GO:0055085), Cellular Component: integral to membrane (GO:0016021)
Os10g0185100	0.634672	6.64934e-08			Conserved hypothetical protein.	0
Os10g0445400	0.634619	1.54617e-07	OsHCI1, E3UL	0	Zinc finger, RING/FYVE/PHD-type domain containing protein.	Molecular Function: protein binding (GO:0005515), Molecular Function: zinc ion binding (GO:0008270)
Os02g0759900	0.634479	0.0001285			Similar to threonine endopeptidase.	0
Os03g0707250	0.63445	0.00069483			Non-protein coding transcript.	0
Os03g0298300	0.634345	2.36998e-05			Uncharacterised protein family UPF0497, trans-membrane plant domain containing protein.	0
Os10g0492300	0.634256	0.00315563			Similar to IAP100.	0
Os02g0100300	0.633919	0.00105523			Similar to HSP associated protein like.	Molecular Function: binding (GO:0005488), Molecular Function: protein binding (GO:0005515)
Os11g0139800	0.633701	5.33232e-05			Non-protein coding transcript.	0
Os05g0427200	0.633479	0.000721116			Similar to Beta-1, 3-galactosyltransferase sqv-2.	Biological Process: protein glycosylation (GO:0006486), Cellular Component: membrane (GO:0016020), Molecular Function: galactosyltransferase activity (GO:0008378)
Os05g0110000	0.633136	2.04428e-05	OsRFP	0	Zinc finger, RING/FYVE/PHD-type domain containing protein.	Molecular Function: protein binding (GO:0005515), Molecular Function: zinc ion binding (GO:0008270)
Os02g0498700	0.632814	5.10056e-05			Similar to QUA1 (QUASIMODO 1); polygalacturonate 4-alpha-galacturonosyltransferase/ transferase, transferring glycosyl groups / transferase, transferring hexosyl groups.	Molecular Function: transferase activity, transferring glycosyl groups (GO:0016757)
Os03g0595300	0.632479	0.00483197			Conserved hypothetical protein.	0
Os08g0274700	0.632401	1.2412e-05	PSF3	PARTNER OF SLD FIVE 3	Similar to TTN10.	0
Os11g0543500	0.63134	0.00289706			Similar to H0502B11.6 protein.	0
Os03g0175200	0.631229	0.00300682			Similar to predicted protein.	0
Os01g0915600	0.631203	3.22783e-05	OsbHLH090	0	Similar to TA1 protein (Fragment).	0
Os01g0222700	0.631044	0.00152747			Protein of unknown function DUF659 domain containing protein.	Molecular Function: nucleic acid binding (GO:0003676), Molecular Function: DNA binding (GO:0003677), Molecular Function: protein dimerization activity (GO:0046983)
Os09g0338400	0.630876	3.00006e-07	OsISC1	IRON-SULFUR CLUSTER PROTEIN 1	Similar to Cysteine desulfurase, mitochondrial precursor (EC 2.8.1.7) (m-Nfs1).	Biological Process: metabolic process (GO:0008152), Molecular Function: catalytic activity (GO:0003824), Molecular Function: pyridoxal phosphate binding (GO:0030170)
Os03g0206900	0.630851	2.31469e-07			Zinc finger, RING/FYVE/PHD-type domain containing protein.	Molecular Function: protein binding (GO:0005515), Molecular Function: zinc ion binding (GO:0008270)
Os08g0517600	0.630845	0.00309839			Similar to Methylase.	Biological Process: metabolic process (GO:0008152), Molecular Function: methyltransferase activity (GO:0008168)
Os01g0530366	0.630836	3.86899e-05			RNA polymerase Rbp10 domain containing protein.	Biological Process: transcription, DNA-dependent (GO:0006351), Molecular Function: DNA binding (GO:0003677), Molecular Function: DNA-directed RNA polymerase activity (GO:0003899)
Os12g0277500	0.630665	0.0087708	OsCPn60alpha1, OsCPn60a1	0	Plastid chaperonin 60 alpha subunit, Folding of Rubisco large subunit (rbcL), Seedling development	Biological Process: protein folding (GO:0006457), Biological Process: protein refolding (GO:0042026), Molecular Function: ATP binding (GO:0005524), Cellular Component: cytoplasm (GO:0005737)
Os03g0154000	0.630381	0.00724496			Aromatic-ring hydroxylase family protein.	Biological Process: metabolic process (GO:0008152), Molecular Function: oxidoreductase activity (GO:0016491)
Os05g0530300	0.630019	0.0029269			Conserved hypothetical protein.	0
Os07g0622900	0.629948	2.02746e-05			Endoplasmic reticulum (ER) membrane protein, Early tapetum development and meiosis	Biological Process: signal peptide processing (GO:0006465), Molecular Function: peptidase activity (GO:0008233), Cellular Component: signal peptidase complex (GO:0005787), Cellular Component: integral component of membrane (GO:0016021)
Os05g0397650	0.629761	1.26122e-05	OsRFPHC-8	0	Similar to zinc finger (C3HC4-type RING finger) family protein.	Molecular Function: protein binding (GO:0005515), Molecular Function: zinc ion binding (GO:0008270)
Os01g0102900	0.629456	1.13107e-05	Lir1, OsLIR1, Os-LIR1	0	Light-regulated protein, Regulation of light-dependent attachment of LEAF-TYPE FERREDOXIN-NADP+ OXIDOREDUCTASE (LFNR) to the thylakoid membrane	0
Os01g0141100	0.629351	1.71491e-05	OsSKD1, SKD1	0	Similar to Salt-induced AAA-Type ATPase.	0
Os01g0208700	0.629346	0.00142629	PEPC-2, Osppc4, ppc4	0	Similar to Phosphoenolpyruvate carboxylase (Fragment).	Biological Process: tricarboxylic acid cycle (GO:0006099), Biological Process: carbon fixation (GO:0015977), Molecular Function: catalytic activity (GO:0003824), Molecular Function: phosphoenolpyruvate carboxylase activity (GO:0008964)
Os01g0971700	0.628564	1.78709e-07			Streptomyces cyclase/dehydrase family protein.	0
Os10g0317300	0.628454	8.96506e-06			Conserved hypothetical protein.	0
Os01g0151600	0.62842	0.00238173			Conserved hypothetical protein.	0
Os02g0726300	0.627811	0.000141726	OsDof4, OsDof8, Dof8, OsDof-8, DOF8	0	Similar to AOBP (Ascorbate oxidase promoter-binding protein).	Biological Process: regulation of transcription, DNA-dependent (GO:0006355), Molecular Function: DNA binding (GO:0003677), Molecular Function: zinc ion binding (GO:0008270)
Os12g0570000	0.627786	3.5278e-05	spl11, spl11*, OsPUB11, PUB11	CELL DEATH-RELATED PROTEIN SPL11	Armadillo-like helical domain containing protein.	Biological Process: protein ubiquitination (GO:0016567), Cellular Component: ubiquitin ligase complex (GO:0000151), Molecular Function: ubiquitin-protein ligase activity (GO:0004842), Molecular Function: binding (GO:0005488), Molecular Function: protein binding (GO:0005515)
Os03g0695500	0.627763	5.33689e-09			Similar to predicted protein.	0
Os03g0273800	0.627455	0.00212525			HAD-superfamily hydrolase, subfamily IA, variant 3 domain containing protein.	Biological Process: metabolic process (GO:0008152), Molecular Function: catalytic activity (GO:0003824), Molecular Function: hydrolase activity (GO:0016787)
Os04g0472400	0.627075	0.000363252			Similar to RNA recognition motif family protein.	0
Os03g0856500	0.626828	2.26144e-05			Similar to Plastid-specific 30S ribosomal protein 1, chloroplast precursor (CS- S5) (CS5) (S22) (Ribosomal protein 1) (PSRP-1).	Biological Process: primary metabolic process (GO:0044238), Molecular Function: binding (GO:0005488)
Os07g0628900	0.625959	6.21076e-09			Similar to KI domain interacting kinase 1.	Biological Process: protein phosphorylation (GO:0006468), Molecular Function: protein kinase activity (GO:0004672), Molecular Function: protein serine/threonine kinase activity (GO:0004674), Molecular Function: ATP binding (GO:0005524), Molecular Function: transferase activity, transferring phosphorus-containing groups (GO:0016772)
Os11g0432400	0.625878	0.000347979			Similar to 2-oxoglutarate/malate translocator.	Biological Process: transport (GO:0006810), Biological Process: transmembrane transport (GO:0055085), Cellular Component: mitochondrial inner membrane (GO:0005743), Molecular Function: binding (GO:0005488)
Os03g0855600	0.625695	4.27708e-05			Similar to DANA2.	0
Os04g0470100	0.625502	4.13144e-06	OsRab2A1, OsRab2	0	Similar to Small GTP binding protein Rab2.	Biological Process: GTP catabolic process (GO:0006184), Biological Process: intracellular protein transport (GO:0006886), Biological Process: nucleocytoplasmic transport (GO:0006913), Biological Process: signal transduction (GO:0007165), Biological Process: small GTPase mediated signal transduction (GO:0007264), Biological Process: protein transport (GO:0015031), Cellular Component: intracellular…
Os03g0826200	0.625326	8.36946e-05			Conserved hypothetical protein.	0
Os12g0623600	0.625193	0.000906115			Protein of unknown function DUF1637 family protein.	Biological Process: oxidation-reduction process (GO:0055114), Molecular Function: cysteamine dioxygenase activity (GO:0047800)
Os04g0559400	0.625193	3.07077e-06			Similar to Branched-chain-amino-acid aminotransferase 5, chloroplast precursor (EC 2.6.1.42) (Atbcat-5).	Biological Process: metabolic process (GO:0008152), Biological Process: branched chain family amino acid metabolic process (GO:0009081), Molecular Function: catalytic activity (GO:0003824), Molecular Function: branched-chain-amino-acid transaminase activity (GO:0004084)
Os04g0672800	0.624995	3.07075e-05			Similar to H0322F07.5 protein.	0
Os06g0475500	0.624736	3.7936e-06			Conserved hypothetical protein.	0
Os02g0233333	0.624607	0.00495407			Similar to predicted protein.	0
Os12g0584200	0.624539	0.000281488			Similar to cDNA clone:J013075O22, full insert sequence.	0
Os08g0155700	0.623697	8.77824e-09			Similar to DNA-directed RNA polymerase (Fragment).	Biological Process: transcription, DNA-dependent (GO:0006351), Molecular Function: DNA binding (GO:0003677), Molecular Function: DNA-directed RNA polymerase activity (GO:0003899)
Os03g0267300	0.623335	1.76099e-05	OsCFR	0	Similar to Fructose-1, 6-bisphosphatase, chloroplast precursor (EC 3.1.3.11) (D- fructose-1, 6-bisphosphate 1-phosphohydrolase) (FBPase).	Biological Process: carbohydrate metabolic process (GO:0005975), Molecular Function: phosphoric ester hydrolase activity (GO:0042578)
Os02g0680600	0.623061	0.000392471	OsMCS, MCS	0	Similar to 2-C-methyl-D-erythritol 2, 4-cyclodiphosphate synthase, chloroplast precursor (EC 4.6.1.12) (MECPS) (MECDP-synthase).	Biological Process: terpenoid biosynthetic process (GO:0016114), Molecular Function: 2-C-methyl-D-erythritol 2, 4-cyclodiphosphate synthase activity (GO:0008685)
Os05g0586900	0.623024	0.000590496			Hypothetical conserved gene.	Molecular Function: binding (GO:0005488)
Os08g0347500	0.622986	0.000913911			Similar to PsbP family protein, expressed.	Biological Process: photosynthesis (GO:0015979), Cellular Component: photosystem II (GO:0009523), Cellular Component: oxygen evolving complex (GO:0009654), Cellular Component: extrinsic to membrane (GO:0019898), Molecular Function: calcium ion binding (GO:0005509)
Os03g0118600	0.622518	0.00413595			Similar to Dihydrodipicolinate reductase-like protein.	Biological Process: lysine biosynthetic process via diaminopimelate (GO:0009089), Biological Process: oxidation-reduction process (GO:0055114), Molecular Function: nucleotide binding (GO:0000166), Molecular Function: dihydrodipicolinate reductase activity (GO:0008839), Molecular Function: NADPH binding (GO:0070402)
Os03g0360500	0.622075	8.55352e-06			Protein of unknown function DUF1077 family protein.	0
Os01g0912700	0.621741	7.25751e-05			Similar to T23K8.14 protein.	0
Os10g0478900	0.620763	0.00147741			Conserved hypothetical protein.	0
Os02g0326500	0.620536	0.000203464			Similar to targeting protein-related.	0
Os03g0298800	0.620469	0.00273157			Similar to Spliceosomal protein.	Molecular Function: nucleotide binding (GO:0000166), Molecular Function: nucleic acid binding (GO:0003676)
Os02g0187500	0.620284	1.2901e-05			Uncharacterised protein family UPF0047 domain containing protein.	0
Os10g0154000	0.619674	7.51699e-06			Membrane-trafficking protein, Intracellular SNARE protein, Resistance to rice blast disease	Biological Process: transport (GO:0006810), Biological Process: vesicle-mediated transport (GO:0016192), Cellular Component: integral component of membrane (GO:0016021)
Os01g0571100	0.619089	0.00201802			Similar to gibberellin responsive1.	0
Os11g0153500	0.618919	0.00917178			Protein of unknown function DUF3049 domain containing protein.	0
Os05g0441500	0.618728	5.22929e-05			Conserved hypothetical protein.	0
Os03g0794900	0.618693	4.65343e-12			Frigida-like family protein.	0
Os04g0465432	0.618308	0.000157561	OsTBL53, TBL53	0	Domain of unknown function DUF231, plant domain containing protein.	0
Os02g0799300	0.618223	0.00141869			Similar to H0306F03.12 protein.	0
Os03g0610800	0.61815	6.51412e-05	OsSRP-FRS, OrysaZxb	0	Similar to Protein zx.	Molecular Function: serine-type endopeptidase inhibitor activity (GO:0004867)
Os08g0439200	0.617969	1.09665e-06			Non-protein coding transcript.	0
Os04g0431300	0.617753	1.49986e-05			Acyl-CoA N-acyltransferase domain containing protein.	0
Os10g0545200	0.617578	4.78572e-05	OsGL1-10	0	Similar to 4, 4-dimethyl-sterol C4-methyl-oxidase (Fragment).	Biological Process: fatty acid biosynthetic process (GO:0006633), Biological Process: oxidation-reduction process (GO:0055114), Molecular Function: iron ion binding (GO:0005506), Molecular Function: oxidoreductase activity (GO:0016491)
Os08g0288050	0.617507	0.00393092			Hypothetical conserved gene.	0
Os09g0530600	0.617043	1.20192e-05			Zinc finger, CCCH-type domain containing protein.	Molecular Function: nucleic acid binding (GO:0003676), Molecular Function: zinc ion binding (GO:0008270)
Os01g0303000	0.616944	0.000323989			Similar to CP12 (Fragment).	0
Os08g0412401	0.616589	5.23704e-07	OsAPRL4	0	Similar to Adenosine 5'-phosphosulfate reductase-like.	0
Os03g0806500	0.615743	2.12471e-08	OsAPRL5	0	Thioredoxin domain 2 containing protein.	Biological Process: cell redox homeostasis (GO:0045454)
Os07g0580900	0.615618	1.39265e-05	OsGGPPS1	GERANYLGERANYL DIPHOSPHATE SYNTHASE 1	Similar to GGDP synthase.	Biological Process: isoprenoid biosynthetic process (GO:0008299)
Os03g0265900	0.614915	1.48687e-05			Conserved hypothetical protein.	0
Os03g0104000	0.614912	0.00449864			Similar to Viral A-type inclusion protein repeat containing protein, expressed.	0
Os04g0583900	0.614852	0.00415265	LHY, LHY-like_chr.4, OsMYBR1, MYBR1, OsMYB1R35, MYB1R35	0	Similar to LHY protein.	Biological Process: regulation of transcription, DNA-dependent (GO:0006355), Molecular Function: DNA binding (GO:0003677), Molecular Function: protein binding (GO:0005515)
Os08g0227100	0.614559	0.00920815			Kelch related domain containing protein.	Molecular Function: protein binding (GO:0005515)
Os09g0464000	0.613974	0.000815646			Similar to Carbonate dehydratase-like protein.	Biological Process: carbon utilization (GO:0015976), Molecular Function: carbonate dehydratase activity (GO:0004089), Molecular Function: zinc ion binding (GO:0008270)
Os02g0768700	0.613679	0.000704644			Protein of unknown function DUF573 domain containing protein.	0
Os07g0513000	0.613378	0.000138065	0	0	Similar to ATP synthase gamma chain, chloroplast (EC 3.6.1.34) (Fragment).	Biological Process: ATP synthesis coupled proton transport (GO:0015986), Cellular Component: proton-transporting ATP synthase complex, catalytic core F(1) (GO:0045261), Molecular Function: hydrogen ion transporting ATP synthase activity, rotational mechanism (GO:0046933), Molecular Function: proton-transporting ATPase activity, rotational mechanism (GO:0046961)
Os02g0549600	0.613146	0.0022586			Similar to 40S ribosomal protein S10-1.	0
Os05g0140500	0.613062	3.47631e-07	OsY14a, Y14a	0	RNA binding motif protein 8 family protein.	Biological Process: RNA processing (GO:0006396), Cellular Component: nucleus (GO:0005634), Cellular Component: cytoplasm (GO:0005737), Molecular Function: nucleotide binding (GO:0000166), Molecular Function: nucleic acid binding (GO:0003676), Molecular Function: RNA binding (GO:0003723)
Os03g0737400	0.612929	0.000760831			HAD-superfamily phosphatase, subfamily IIIC domain containing protein.	Molecular Function: phosphatase activity (GO:0016791)
Os03g0226700	0.612186	8.71933e-05			Conserved hypothetical protein.	0
Os02g0771600	0.611688	0.000431005	OsACO3	AMINOCYCLOPROPANE-1-CARBOXYLIC ACID OXIDASE 3	Similar to 1-aminocyclopropane-1-carboxylate oxidase (Fragment).	Biological Process: oxidation-reduction process (GO:0055114), Molecular Function: oxidoreductase activity (GO:0016491), Molecular Function: oxidoreductase activity, acting on paired donors, with incorporation or reduction of molecular oxygen, 2-oxoglutarate as one donor, and incorporation of one atom each of oxygen into both donors (GO:0016706)
Os03g0618300	0.611075	0.0012625			Isopenicillin N synthase family protein.	Biological Process: oxidation-reduction process (GO:0055114), Molecular Function: iron ion binding (GO:0005506), Molecular Function: oxidoreductase activity (GO:0016491), Molecular Function: oxidoreductase activity, acting on paired donors, with incorporation or reduction of molecular oxygen, 2-oxoglutarate as one donor, and incorporation of one atom each of oxygen into both donors (GO:0016706)
Os05g0533700	0.610808	0.000174363			NADH-ubiquinone oxidoreductase subunit PSST (Fragment).	Biological Process: oxidation-reduction process (GO:0055114), Molecular Function: NADH dehydrogenase (ubiquinone) activity (GO:0008137), Molecular Function: oxidoreductase activity, acting on NADH or NADPH (GO:0016651), Molecular Function: quinone binding (GO:0048038), Molecular Function: 4 iron, 4 sulfur cluster binding (GO:0051539)
Os06g0102600	0.610721	0.00920672			Similar to HCF106 precursor protein.	0
Os02g0603900	0.609894	0.00110747			Hypothetical protein.	0
Os01g0175100	0.609799	0.00973814			Kv1.4 voltage-gated K+ channel family protein.	0
Os07g0646000	0.609421	0.00127895			Conserved hypothetical protein.	0
Os02g0120600	0.60931	7.95543e-05	OsUBC13	UBIQUITIN-CONJUGATING ENZYME 13	Similar to Ubiquitin-conjugating enzyme E2-17 kDa 9 (EC 6.3.2.19) (Ubiquitin- protein ligase 9) (Ubiquitin carrier protein 9) (UBCAT4B).	Molecular Function: acid-amino acid ligase activity (GO:0016881)
Os06g0219700	0.609122	1.46566e-07	OsFbox304, Os_F0494	0	Similar to TA2 protein (Fragment).	0
Os03g0744600	0.608747	2.92138e-06			Similar to Ripening-associated protein (Fragment).	0
Os08g0261100	0.60824	0.00871228			Protein of unknown function DUF1218 family protein.	0
Os05g0536800	0.608042	0.00255024	OsFbox270, Os_F0454	0	F-box domain, cyclin-like domain containing protein.	Molecular Function: protein binding (GO:0005515)
Os07g0255300	0.607898	6.75911e-05			Conserved hypothetical protein.	0
Os12g0271700	0.607785	0.000815646			Similar to prenyl transferase.	Biological Process: photosynthesis (GO:0015979), Molecular Function: transferase activity, transferring alkyl or aryl (other than methyl) groups (GO:0016765)
Os05g0349700	0.607779	0.00119566	OsYGL1, CHLG, Ygl1, CS, OsCHLG	0	Chl synthase, Chl biosynthesis	Biological Process: bacteriochlorophyll biosynthetic process (GO:0030494), Cellular Component: integral to membrane (GO:0016021), Molecular Function: prenyltransferase activity (GO:0004659)
Os09g0452300	0.607737	0.00034132			Similar to cDNA, clone: J065054A13, full insert sequence.	Biological Process: transmembrane transport (GO:0055085), Cellular Component: membrane (GO:0016020), Cellular Component: integral to membrane (GO:0016021), Molecular Function: transmembrane transporter activity (GO:0022857), Molecular Function: substrate-specific transmembrane transporter activity (GO:0022891)
Os04g0571800	0.607641	0.000411894			Zinc finger, RING/FYVE/PHD-type domain containing protein.	Molecular Function: protein binding (GO:0005515), Molecular Function: zinc ion binding (GO:0008270)
Os11g0237700	0.606834	0.00156152			Similar to URF 4-related.	Biological Process: RNA processing (GO:0006396), Molecular Function: RNA binding (GO:0003723), Molecular Function: ribonuclease III activity (GO:0004525)
Os05g0483801	0.606205	0.00887611			Similar to Cyclin-dependent kinase B2-1.	0
Os03g0169100	0.605729	1.0392e-05	RPE	0	Ribulose-phosphate 3-epimerase, chloroplast precursor (EC 5.1.3.1) (Pentose-5-phosphate 3-epimerase) (PPE) (RPE) (R5P3E).	Biological Process: carbohydrate metabolic process (GO:0005975), Biological Process: metabolic process (GO:0008152), Molecular Function: catalytic activity (GO:0003824), Molecular Function: ribulose-phosphate 3-epimerase activity (GO:0004750)
Os05g0357200	0.605348	5.1512e-07			Adenine nucleotide translocator 1 domain containing protein.	Biological Process: transport (GO:0006810), Biological Process: transmembrane transport (GO:0055085), Cellular Component: mitochondrial inner membrane (GO:0005743), Molecular Function: binding (GO:0005488)
Os08g0369700	0.604741	0.00304952	OsISC10	IRON-SULFUR CLUSTER PROTEIN 10	FeS cluster insertion domain containing protein.	Biological Process: iron-sulfur cluster assembly (GO:0016226), Molecular Function: structural molecule activity (GO:0005198), Molecular Function: iron-sulfur cluster binding (GO:0051536)
Os01g0739300	0.6038	0.00460139			Hypothetical gene.	0
Os08g0503200	0.603747	0.00588957			PLC-like phosphodiesterase, TIM beta/alpha-barrel domain domain containing protein.	Biological Process: glycerol metabolic process (GO:0006071), Biological Process: lipid metabolic process (GO:0006629), Molecular Function: phosphoric diester hydrolase activity (GO:0008081), Molecular Function: glycerophosphodiester phosphodiesterase activity (GO:0008889)
Os03g0833800	0.603071	2.95176e-05			Pectin lyase fold/virulence factor domain containing protein.	Biological Process: carbohydrate metabolic process (GO:0005975), Molecular Function: polygalacturonase activity (GO:0004650)
Os02g0545000	0.602949	0.000901183			Similar to Myosin.	0
Os10g0155400	0.602752	0.00844734			Similar to Amidase family protein, expressed.	Molecular Function: carbon-nitrogen ligase activity, with glutamine as amido-N-donor (GO:0016884)
Os09g0240200	0.602732	0.00185712			Zinc finger, B-box domain containing protein.	Cellular Component: intracellular (GO:0005622), Molecular Function: protein binding (GO:0005515), Molecular Function: zinc ion binding (GO:0008270)
Os06g0729650	0.602486	0.00521859			Similar to Photosystem II stability/assembly factor HCF136, chloroplastic.	0
Os05g0213500	0.602366	1.06903e-06	OsPYL/RCAR5, PYL5, OsPYL5, OsPYL11	0	Rice orthologue of the abscisic acid (ABA) receptor, Positive regulator of the ABA signal transduction pathway, Abiotic stress tolerance	0
Os11g0605500	0.602307	0.000849163	ACX2, OsACX2	0	Acyl-CoA oxidase.	Biological Process: fatty acid metabolic process (GO:0006631), Biological Process: fatty acid beta-oxidation (GO:0006635), Biological Process: metabolic process (GO:0008152), Biological Process: oxidation-reduction process (GO:0055114), Cellular Component: peroxisome (GO:0005777), Molecular Function: acyl-CoA dehydrogenase activity (GO:0003995), Molecular Function: acyl-CoA oxidase activity (GO:0…
Os04g0501800	0.602188	0.0047596			Protein of unknown function DUF1068 family protein.	0
Os01g0635400	0.602106	0.00411452	OsWD40-20	0	Similar to mRNA-associated protein mrnp 41 (Rae1 protein homolog).	Molecular Function: protein binding (GO:0005515)
Os09g0134400	0.601765	6.07984e-07			Phospholipase A2, active site domain containing protein.	0
Os07g0572000	0.6011	0.000233363	OsWD40-144	0	WD40/YVTN repeat-like domain containing protein.	Molecular Function: protein binding (GO:0005515)
Os01g0884900	0.601088	0.000107064			Similar to DNA glycosylase.	0
Os05g0397300	0.601053	0.00161653			Conserved hypothetical protein.	0
Os04g0577800	0.600941	0.00490816			Uncharacterised protein family UPF0136, Transmembrane domain containing protein.	Cellular Component: membrane (GO:0016020)
Os03g0146500	0.600864	2.18149e-07			Similar to (RAP Annotation release2) Galactose-binding like domain containing protein.	0
Os01g0777101	0.600789	0.000246544			Hypothetical gene.	0
Os07g0516000	0.600653	0.00302155			Neuraminidase domain containing protein.	0
Os01g0732200	0.599157	0.000104654			GTP-binding protein, HSR1-related domain containing protein.	Biological Process: barrier septum formation (GO:0000917), Cellular Component: intracellular (GO:0005622), Molecular Function: GTP binding (GO:0005525)
Os03g0146600	0.599052	0.000323595			Similar to HEAT repeat family protein, expressed.	0
Os02g0655300	0.599032	3.21153e-05			Similar to 3-isopropylmalate dehydratase, small subunit.	Biological Process: metabolic process (GO:0008152)
Os01g0660900	0.59894	0.000910731			Similar to phosphoglycerate mutase family protein.	0
Os02g0182800	0.598265	3.63714e-08	0	HOMEOBOX PROTEIN HOS58	Similar to NTH23 protein.	Biological Process: regulation of transcription, DNA-dependent (GO:0006355), Cellular Component: nucleus (GO:0005634), Molecular Function: DNA binding (GO:0003677), Molecular Function: sequence-specific DNA binding transcription factor activity (GO:0003700), Molecular Function: protein binding (GO:0005515), Molecular Function: sequence-specific DNA binding (GO:0043565)
Os01g0925200	0.598063	0.000199132			Similar to Enoyl CoA hydratase-like protein.	Biological Process: metabolic process (GO:0008152), Molecular Function: catalytic activity (GO:0003824)
Os07g0635700	0.59777	0.00240109			Cytochrome P450 family protein.	Biological Process: oxidation-reduction process (GO:0055114), Molecular Function: iron ion binding (GO:0005506), Molecular Function: electron carrier activity (GO:0009055), Molecular Function: oxidoreductase activity, acting on paired donors, with incorporation or reduction of molecular oxygen (GO:0016705), Molecular Function: heme binding (GO:0020037)
Os03g0319100	0.597704	3.42283e-05			Similar to SNF1-related protein kinase regulatory subunit beta-1.	Molecular Function: protein binding (GO:0005515)
Os05g0536200	0.596114	0.000108592	OSVDAC2, osvdac2, OsVDAC2, VDAC2	0	Voltage-dependent anion channel.	Biological Process: anion transport (GO:0006820), Biological Process: regulation of anion transport (GO:0044070), Biological Process: transmembrane transport (GO:0055085), Cellular Component: mitochondrial outer membrane (GO:0005741), Molecular Function: voltage-gated anion channel activity (GO:0008308)
Os06g0238900	0.596029	0.00841128			Protein of unknown function DUF716 family protein.	0
Os05g0480000	0.595893	0.00757033	OsSTN8	STATE TRANSITION 8	Serine/threonine protein kinase, Photosystem II (PSII) repair, Phosphorylation of PSII core protein	Biological Process: protein phosphorylation (GO:0006468), Molecular Function: protein kinase activity (GO:0004672), Molecular Function: protein serine/threonine kinase activity (GO:0004674), Molecular Function: ATP binding (GO:0005524), Molecular Function: transferase activity, transferring phosphorus-containing groups (GO:0016772)
Os06g0175400	0.5953	0.00022683			Hypothetical conserved gene.	0
Os01g0962400	0.594991	0.000155932			Ubiquitin-like, Ufm1 domain containing protein.	0
Os07g0598200	0.594807	1.31676e-05	Os_F0793	0	Similar to Circadian clock coupling factor ZGT.	0
Os03g0224200	0.59471	6.55109e-14	OsRR21, Rrb1, Orr1, OsRR19, OsRRB1, ORR1	B-TYPE RESPONSE REGULATOR 1	B-type response regulator, Cytokinin signaling	Biological Process: two-component signal transduction system (phosphorelay) (GO:0000160), Biological Process: regulation of transcription, DNA-dependent (GO:0006355), Molecular Function: two-component response regulator activity (GO:0000156), Molecular Function: DNA binding (GO:0003677), Molecular Function: protein binding (GO:0005515)
Os02g0593500	0.59447	6.9339e-05	OsPT14	PHOSPHATE TRANSPORTER 14	Phosphate transporter family protein.	Biological Process: phosphate ion transport (GO:0006817), Cellular Component: membrane (GO:0016020), Molecular Function: inorganic phosphate transmembrane transporter activity (GO:0005315)
Os07g0179500	0.594078	0.00160052			Hypothetical conserved gene.	0
Os04g0422000	0.59405	0.00181026			PAP fibrillin family protein.	Cellular Component: chloroplast (GO:0009507), Molecular Function: structural molecule activity (GO:0005198)
Os05g0515200	0.593655	0.00520952			Cytochrome P450 family protein.	Biological Process: oxidation-reduction process (GO:0055114), Molecular Function: iron ion binding (GO:0005506), Molecular Function: electron carrier activity (GO:0009055), Molecular Function: oxidoreductase activity, acting on paired donors, with incorporation or reduction of molecular oxygen (GO:0016705), Molecular Function: heme binding (GO:0020037)
Os03g0272900	0.593429	0.00431593			DVL family protein.	0
Os08g0425800	0.593211	0.00290753	0	0	Similar to DRP2 protein (Fragment).	0
Os06g0708300	0.593207	8.54599e-05			Similar to RER1A protein.	Cellular Component: integral to membrane (GO:0016021)
Os03g0315800	0.593076	0.00376013			Similar to 30S ribosomal protein S1, chloroplast precursor (CS1).	Molecular Function: RNA binding (GO:0003723)
Os05g0512500	0.592342	0.00184744			CT20 family protein.	Biological Process: regulation of transcription, DNA-dependent (GO:0006355), Cellular Component: nucleus (GO:0005634), Cellular Component: H4/H2A histone acetyltransferase complex (GO:0043189)
Os09g0455400	0.591675	0.000182232			Similar to Heat shock protein.	0
Os03g0106000	0.591631	0.000101627			Uncharacterised protein family UPF0187 domain containing protein.	0
Os04g0244800	0.591511	1.7556e-05			Heavy metal transport/detoxification protein domain containing protein.	Biological Process: metal ion transport (GO:0030001), Molecular Function: metal ion binding (GO:0046872)
Os09g0251400	0.591381	0.00466219			Non-protein coding transcript.	0
Os05g0419000	0.591373	0.000129431	0	NYC3-LIKE 3	Alpha/beta hydrolase family protein.	0
Os08g0559200	0.591314	0.000155219			Similar to Ribosomal protein S25 (40S ribosomal 25S subunit).	0
Os04g0387900	0.591197	0.00414095			Similar to AT.I.24-6 protein (Fragment).	0
Os07g0634300	0.589901	0.00466219			Similar to Low temperature viability protein.	0
Os01g0205700	0.589894	0.000404884	GSK1, Os GSK1, OsGSK1	0	Similar to Shaggy-like kinase (Fragment).	Biological Process: protein phosphorylation (GO:0006468), Molecular Function: protein kinase activity (GO:0004672), Molecular Function: protein serine/threonine kinase activity (GO:0004674), Molecular Function: ATP binding (GO:0005524), Molecular Function: transferase activity, transferring phosphorus-containing groups (GO:0016772)
Os12g0534200	0.589603	0.00757033			Similar to Acyl carrier protein I, chloroplast precursor (ACP I).	Biological Process: fatty acid biosynthetic process (GO:0006633), Molecular Function: acyl carrier activity (GO:0000036), Molecular Function: phosphopantetheine binding (GO:0031177), Molecular Function: cofactor binding (GO:0048037)
Os03g0157300	0.589528	0.003223	OsMCA1	0	Ca2+-permeable mechanosensitive channel, Regulation of plasma membrane Ca2+ influx, ROS generation induced by hypo-osmotic stress	0
Os04g0484800	0.589131	0.00555542	APC2, OsAPC2	0	Cullin family protein.	Biological Process: ubiquitin-dependent protein catabolic process (GO:0006511), Cellular Component: cullin-RING ubiquitin ligase complex (GO:0031461), Molecular Function: ubiquitin protein ligase binding (GO:0031625)
Os01g0899200	0.589114	0.00104229			Similar to dehydration-responsive family protein.	Molecular Function: methyltransferase activity (GO:0008168)
Os08g0109100	0.588372	0.00636848			Similar to SAC domain protein 1 (FIG4-like protein AtFIG4).	Molecular Function: phosphoric ester hydrolase activity (GO:0042578)
Os02g0664000	0.588185	4.25045e-05	OsGpx3, GPX3, OsGPx03	GLUTATHIONE PEROXIDASE 3	Similar to Phospholipid hydroperoxide glutathione peroxidase, chloroplast precursor (EC 1.11.1.12) (PHGPx).	Biological Process: response to oxidative stress (GO:0006979), Biological Process: oxidation-reduction process (GO:0055114), Molecular Function: glutathione peroxidase activity (GO:0004602)
Os01g0763700	0.588055	0.00831891			Similar to CRR7 (CHLORORESPIRATORY REDUCTION 7).	0
Os03g0738300	0.586481	0.000131558			Hypothetical protein.	0
Os08g0506850	0.58631	1.9091e-05			Hypothetical gene.	0
Os07g0442000	0.585918	6.55051e-12	OsFbox371, Os_F0357	0	Conserved hypothetical protein.	0
Os04g0610800	0.584998	0.00235392			Similar to Coproporphyrinogen III oxidase (Fragment).	Biological Process: porphyrin-containing compound biosynthetic process (GO:0006779), Biological Process: oxidation-reduction process (GO:0055114), Molecular Function: coproporphyrinogen oxidase activity (GO:0004109)
Os01g0752100	0.584874	0.000132567	OsFbox037, OsFbox37, Os_F0332	0	Cyclin-like F-box domain containing protein.	Molecular Function: protein binding (GO:0005515)
Os07g0247100	0.584673	0.0036004			Chloroplast-localised putative leucine carboxyl methyltransferase (LCMT), Regulation of jasmonate (JA)- and brassinosteroid (BR)-mediated growth and defence responses	Biological Process: methylation (GO:0032259), Molecular Function: methyltransferase activity (GO:0008168)
Os05g0481000	0.584662	0.000949409	OsSNAT1	SEROTONIN N-ACETYLTRANSFERASE-1	Serotonin N-acetyltransferase, Melatonin synthesis	Molecular Function: N-acetyltransferase activity (GO:0008080)
Os07g0558500	0.584463	0.00014713	OsNYC4	0	Inositol phosphatase-like protein.	Biological Process: thylakoid membrane organization (GO:0010027), Biological Process: photosynthesis (GO:0015979), Cellular Component: photosystem II (GO:0009523)
Os03g0685300	0.584342	0.000137842			Glutamine amidotransferase class-I domain containing protein.	0
Os02g0832600	0.583851	5.37481e-05			Similar to PRLI-interacting factor A (Fragment).	0
Os03g0769600	0.583833	0.00246613			ResB-like family protein.	0
Os02g0529400	0.582838	0.000119481	OsNIN3	NEUTRAL/ALKALINE INVERTASE 3	Plant neutral invertase family protein.	Molecular Function: catalytic activity (GO:0003824)
Os05g0181000	0.58276	0.0015651			Heat shock protein Hsp70 family protein.	Molecular Function: ATP binding (GO:0005524)
Os03g0251800	0.582649	0.000377335			Conserved hypothetical protein.	0
Os03g0213100	0.582423	0.00842517	0	0	Similar to Sec61p.	Biological Process: protein transport (GO:0015031), Cellular Component: membrane (GO:0016020), Molecular Function: P-P-bond-hydrolysis-driven protein transmembrane transporter activity (GO:0015450)
Os07g0680300	0.581857	0.00147682			Similar to Ubiquinol-cytochrome c reductase complex 6.7 kDa protein (EC 1.10.2.2) (CR6).	0
Os01g0237100	0.58158	3.00697e-05			Phosphoglycerate mutase domain containing protein.	0
Os01g0266600	0.581442	0.000457394			Thioredoxin fold domain containing protein.	Molecular Function: oxidoreductase activity (GO:0016491)
Os10g0564000	0.581271	0.00208005			K Homology, type 1, subgroup domain containing protein.	Molecular Function: RNA binding (GO:0003723)
Os01g0874700	0.581191	1.908e-05			GOLD domain containing protein.	Biological Process: transport (GO:0006810), Cellular Component: integral to membrane (GO:0016021)
Os03g0355900	0.581124	0.00102056			Hypothetical conserved gene.	0
Os03g0382350	0.580591	1.46235e-05			Hypothetical conserved gene.	0
Os10g0565150	0.580044	0.000218994			Hypothetical gene.	0
Os04g0247500	0.579725	0.000110904			Conserved hypothetical protein.	0
Os02g0324700	0.579678	0.000296782			Similar to senescence-associated protein.	0
Os08g0127300	0.579666	6.48161e-05			Conserved hypothetical protein.	0
Os03g0231900	0.579608	0.000499227			Conserved hypothetical protein.	0
Os05g0530500	0.57897	0.00121			Similar to OSK1.	Biological Process: protein phosphorylation (GO:0006468), Molecular Function: protein kinase activity (GO:0004672), Molecular Function: protein serine/threonine kinase activity (GO:0004674), Molecular Function: protein tyrosine kinase activity (GO:0004713), Molecular Function: ATP binding (GO:0005524), Molecular Function: transferase activity, transferring phosphorus-containing groups (GO:0016772)
Os04g0379400	0.578797	0.000910851			Similar to Nuclear pore complex component (sc Seh1) (ISS).	0
Os01g0694300	0.578395	4.20849e-06			Similar to T17H3.9.	0
Os06g0297700	0.578001	0.000124054			Similar to predicted protein.	0
Os04g0565400	0.577994	6.27112e-05	OscZOGT3, cZOGT3, UGT93B	CIS-ZEATIN O-GLUCOSYLTRANSFERASE 3	cis-Zeatin-O-glucosyltransferase, Catalyze O-glucosylation of cZ and cZ-riboside	Biological Process: metabolic process (GO:0008152), Molecular Function: transferase activity, transferring hexosyl groups (GO:0016758)
Os06g0556000	0.577849	2.15836e-05	OsAAP12A, AAP12A, OsAAP3, AAP3	0	Amino acid permease, Transport of amino acids	0
Os12g0597000	0.577828	0.00328583	OsCBL2	CALCINEURIN B-LIKE PROTEIN 2	Similar to Calcineurin B-like protein 2 (SOS3-like calcium binding protein 1).	Molecular Function: calcium ion binding (GO:0005509)
Os08g0137200	0.57766	7.73674e-07			Actin/actin-like family protein.	0
Os05g0323900	0.577183	4.41128e-05			Manganese superoxide dismutase, Heat-stress tolerance	Biological Process: superoxide metabolic process (GO:0006801), Biological Process: oxidation-reduction process (GO:0055114), Molecular Function: superoxide dismutase activity (GO:0004784), Molecular Function: metal ion binding (GO:0046872)
Os10g0536000	0.577172	9.14876e-05	OsSce1, OsUBC1, UBC1	0	Similar to SUMO E2 conjugating enzyme SCE1.	Molecular Function: acid-amino acid ligase activity (GO:0016881)
Os01g0939400	0.576849	0.00723341			Conserved hypothetical protein.	0
Os04g0592600	0.576724	5.40017e-05			Similar to OSIGBa0142I02-OSIGBa0101B20.17 protein.	0
Os01g0309451	0.576562	0.0042134			Hypothetical gene.	0
Os06g0506600	0.576532	0.00568946	OsUBC17	UBIQUITIN-CONJUGATING ENZYME 17	Similar to Ubiquitin carrier protein.	Molecular Function: acid-amino acid ligase activity (GO:0016881)
Os03g0115200	0.576143	0.000398508			Similar to Partner of Nob1; Pno1p; Yor145cp like KH domain containing protein, transcripts identified by EST.	Molecular Function: RNA binding (GO:0003723)
Os01g0343500	0.576081	0.00290753			Similar to TPR repeat.	0
Os03g0219200	0.574581	9.14506e-05	OsSOD2	SUPEROXIDE DISMUTASE 2	Similar to Superoxide dismutase (EC 1.15.1.1).	Biological Process: superoxide metabolic process (GO:0006801), Biological Process: oxidation-reduction process (GO:0055114), Molecular Function: superoxide dismutase activity (GO:0004784), Molecular Function: metal ion binding (GO:0046872)
Os02g0125300	0.574552	0.00953988	OsBI-1, OsBI1, BI1	0	Bax inhibitor-1 (BI-1) (OsBI-1).	Biological Process: negative regulation of apoptosis (GO:0043066), Cellular Component: integral to membrane (GO:0016021)
Os05g0150800	0.574312	0.000441398			Similar to Plastid 5, 10-methylene-tetrahydrofolate dehydrogenase (Fragment).	Biological Process: folic acid-containing compound biosynthetic process (GO:0009396), Biological Process: oxidation-reduction process (GO:0055114), Molecular Function: nucleotide binding (GO:0000166), Molecular Function: catalytic activity (GO:0003824), Molecular Function: methylenetetrahydrofolate dehydrogenase (NADP+) activity (GO:0004488)
Os06g0710300	0.574273	0.00525761			Uncharacterised conserved protein UCP022348 domain containing protein.	0
Os11g0204100	0.574246	0.000243269			Conserved hypothetical protein.	0
Os11g0110901	0.573921	2.87934e-05			Hypothetical conserved gene.	0
Os08g0414600	0.573861	0.000117331			Six-bladed beta-propeller, TolB-like domain containing protein.	Molecular Function: protein binding (GO:0005515)
Os04g0382200	0.573545	0.0076438	OsEXO70F3, OsExo70F3, OrysaF3_Exo70, OsExo70-F3, Exo70-F3	EXOCYST SUBUNIT EXO70 FAMILY PROTEIN F3	Component of Exo70 exocyst complex, Response to the fungal effector, AVR-Pii, Pii-dependent resistance	Biological Process: exocytosis (GO:0006887), Cellular Component: exocyst (GO:0000145)
Os09g0487500	0.57341	0.00521579			Conserved hypothetical protein.	0
Os08g0383700	0.572676	0.000400873			Similar to Repressor protein.	Molecular Function: DNA binding (GO:0003677)
Os02g0550100	0.572473	0.0034852			Similar to Vacuolar ATP synthase 16 kDa proteolipid subunit (EC 3.6.3.14) (V- ATPase 16 kDa proteolipid subunit) (Fragment).	Biological Process: ATP hydrolysis coupled proton transport (GO:0015991), Cellular Component: proton-transporting two-sector ATPase complex, proton-transporting domain (GO:0033177), Cellular Component: proton-transporting V-type ATPase, V domain (GO:0033179), Molecular Function: hydrogen ion transmembrane transporter activity (GO:0015078)
Os06g0184800	0.572096	0.000691924	OsRCI2-8	0	Similar to Low-temperature induced protein lt101.1 (Blt101) (Blt101.1).	Cellular Component: integral to membrane (GO:0016021)
Os05g0193800	0.572076	0.00135894			Conserved hypothetical protein.	0
Os06g0101300	0.571816	0.00178693	OsRFPH2-21	0	Zinc finger, RING/FYVE/PHD-type domain containing protein.	Molecular Function: protein binding (GO:0005515), Molecular Function: zinc ion binding (GO:0008270)
Os08g0101000	0.571009	7.13237e-06	OsLFL2, OsIDEF1	IDE-BINDING FACTOR 1	ABI3/VP1 transcription factor family protein, Regulation of iron-deficiency response and tolerance	Biological Process: regulation of transcription, DNA-dependent (GO:0006355), Molecular Function: DNA binding (GO:0003677)
Os02g0606000	0.570981	2.80089e-05	OsDG2	0	Glycine-rich protein (GRP), Regulation of chloroplast development at early leaf stage	0
Os04g0565900	0.569568	0.00570251	OsbHLH075	0	Basic helix-loop-helix dimerisation region bHLH domain containing protein.	0
Os01g0275300	0.569525	0.00609726			Conserved hypothetical protein.	0
Os07g0260300	0.569174	9.75579e-05			Thioredoxin fold domain containing protein.	Biological Process: oxidation-reduction process (GO:0055114), Molecular Function: antioxidant activity (GO:0016209), Molecular Function: oxidoreductase activity (GO:0016491)
Os06g0661766	0.569133	0.000519914			Hypothetical conserved gene.	0
Os09g0123200	0.568542	9.64503e-07	OsFCA, OsFCA-1, OsFCA-2, OsFCA-3, OsFCA-4, OsFCA-gamma	OSFCA PROTEIN	FCA-like protein, FCA gamma protein, Flowering time related protein involved in autonomous flowering pathway	Molecular Function: nucleic acid binding (GO:0003676), Molecular Function: RNA binding (GO:0003723), Molecular Function: protein binding (GO:0005515)
Os01g0559300	0.568188	0.00925481			Conserved hypothetical protein.	0
Os01g0672800	0.567901	0.00543702			Protein of unknown function DUF1421 domain containing protein.	0
Os08g0397900	0.567726	1.21652e-05			Uncharacterised conserved protein UCP009193 domain containing protein.	0
Os12g0607000	0.567365	0.00155901			Similar to homocysteine S-methyltransferase-2.	Molecular Function: homocysteine S-methyltransferase activity (GO:0008898)
Os12g0534100	0.567328	0.00195083			Conserved hypothetical protein.	0
Os02g0527300	0.566906	0.00681519	HSfA3, OsHsfA3, OsHsf-07, HSF07	HEAT STRESS TRANSCRIPTION FACTOR A3	Similar to Heat shock transcription factor 31 (Fragment).	Biological Process: regulation of transcription, DNA-dependent (GO:0006355), Cellular Component: nucleus (GO:0005634), Molecular Function: sequence-specific DNA binding transcription factor activity (GO:0003700), Molecular Function: sequence-specific DNA binding (GO:0043565)
Os05g0402300	0.566631	1.37734e-07			Uncharacterised protein family UPF0005 domain containing protein.	0
Os11g0163100	0.566503	3.65036e-08	0	0	Similar to Actin 7 (Actin 2).	Molecular Function: ATP binding (GO:0005524)
Os05g0100800	0.566299	9.81465e-10			Nucleic acid-binding, OB-fold domain containing protein.	0
Os01g0948300	0.565185	2.50767e-06			Cellular retinaldehyde-binding/triple function, C-terminal domain containing protein.	0
Os01g0238600	0.564956	0.000834272			Nucleic acid-binding, OB-fold domain containing protein.	0
Os03g0152600	0.564348	0.0020436			Conserved hypothetical protein.	0
Os04g0510300	0.564339	0.0039642			Transcriptional corepressor LEUNIG.	Molecular Function: protein binding (GO:0005515)
Os12g0567200	0.563735	5.63679e-06			Non-protein coding transcript.	0
Os03g0284600	0.56372	1.90926e-05			Thioredoxin-like fold domain containing protein.	Biological Process: oxidation-reduction process (GO:0055114), Molecular Function: antioxidant activity (GO:0016209), Molecular Function: oxidoreductase activity (GO:0016491)
Os08g0425200	0.563473	0.000293741	RcbX, RbcX	0	Chaperonin-like RbcX domain containing protein.	0
Os03g0123100	0.561838	7.71783e-05	OsSce2, OsUBC2, UBC2	0	Similar to SUMO E2 conjugating enzyme SCE1.	Molecular Function: acid-amino acid ligase activity (GO:0016881)
Os01g0201000	0.561416	0.00779712	Orysa;CKL4	_	Similar to protein kinase family protein.	0
Os06g0238300	0.561344	0.000195763			FMN-binding split barrel domain containing protein.	Biological Process: oxidation-reduction process (GO:0055114), Molecular Function: FMN binding (GO:0010181), Molecular Function: oxidoreductase activity (GO:0016491)
Os07g0691800	0.561232	0.00561827	TBPOs-2, OsRpt2a, Rpt2a	0	Similar to 26S proteasome subunit 4-like protein (26S proteasome subunit AtRPT2a).	0
Os10g0406400	0.561078	6.14631e-05	OsCslA2, OsCSLA2	CELLULOSE SYNTHASE LIKE A2	Similar to Cellulose synthase-like A1.	0
Os09g0568000	0.560881	8.16289e-05			Single-stranded nucleic acid binding R3H domain containing protein.	Molecular Function: nucleic acid binding (GO:0003676)
Os02g0608900	0.560866	0.00307001			Similar to Epstein-Barr virus (B95-8 isolate) U2-IR2 domain encoding nuclear protein EBNA2, complete cds.	0
Os01g0928000	0.560231	0.000706924	OsbHLH001, OsICE2, ICE2	_	Similar to Transcription factor ICE1 (Inducer of CBF expression 1) (Basic helix- loop-helix protein 116) (bHLH116) (AtbHLH116).	0
Os05g0335100	0.559567	0.000128808			Saposin-like domain containing protein.	0
Os07g0669600	0.559432	4.44479e-05			Conserved hypothetical protein.	0
Os10g0556200	0.559375	2.30471e-05	OsbHLH113	0	Hypothetical conserved gene.	Biological Process: regulation of transcription, DNA-dependent (GO:0006355)
Os06g0160400	0.55928	0.00147945	HGW	UBA DOMAIN PROTEIN	Similar to Proline-rich cell wall protein-like.	0
Os01g0927600	0.55903	6.00321e-10	OsARF2, OsARF4	AUXIN RESPONSE FACTOR 2	Similar to Auxin response factor 2 (ARF1-binding protein) (ARF1-BP).	Biological Process: regulation of transcription, DNA-dependent (GO:0006355), Biological Process: response to hormone stimulus (GO:0009725), Cellular Component: nucleus (GO:0005634), Molecular Function: DNA binding (GO:0003677), Molecular Function: protein dimerization activity (GO:0046983)
Os09g0287500	0.558955	0.00756289			Protein of unknown function DUF565 family protein.	0
Os03g0277100	0.558736	1.10758e-05			HSP20-like chaperone domain containing protein.	0
Os01g0872800	0.558711	0.000382713	PDK1, OsPdk1, Pdk1	0	Similar to 3-phosphoinositide-dependent protein kinase-1 (Fragment).	Biological Process: protein phosphorylation (GO:0006468), Molecular Function: protein kinase activity (GO:0004672), Molecular Function: protein serine/threonine kinase activity (GO:0004674), Molecular Function: protein binding (GO:0005515), Molecular Function: ATP binding (GO:0005524), Molecular Function: transferase activity, transferring phosphorus-containing groups (GO:0016772)
Os10g0487400	0.558654	0.00181531			Zinc finger, RING/FYVE/PHD-type domain containing protein.	Molecular Function: protein binding (GO:0005515), Molecular Function: zinc ion binding (GO:0008270)
Os12g0222650	0.558448	0.000136266			Hypothetical gene.	0
Os08g0566600	0.558025	0.00175713	OsPGR5	PROTON GRADIENT REGULATION 5	Similar to PGR5.	0
Os09g0115400	0.557896	0.00020964	OsPABPC1, PABPC1	0	Similar to Poly(A)-binding protein.	Molecular Function: nucleotide binding (GO:0000166), Molecular Function: nucleic acid binding (GO:0003676), Molecular Function: RNA binding (GO:0003723)
Os06g0593800	0.557804	0.00117195			UDP-glucuronosyl/UDP-glucosyltransferase family protein.	Biological Process: metabolic process (GO:0008152), Molecular Function: transferase activity, transferring hexosyl groups (GO:0016758)
Os02g0557700	0.557801	2.01009e-06			Short-chain dehydrogenase/reductase SDR domain containing protein.	Biological Process: metabolic process (GO:0008152), Molecular Function: nucleotide binding (GO:0000166), Molecular Function: oxidoreductase activity (GO:0016491)
Os09g0513100	0.557134	0.00220305			Similar to Phospholipase A1.	Biological Process: lipid metabolic process (GO:0006629), Molecular Function: O-acyltransferase activity (GO:0008374)
Os01g0532300	0.556818	0.000572578			Conserved hypothetical protein.	0
Os04g0675300	0.556668	4.39045e-06			Zinc finger, RING/FYVE/PHD-type domain containing protein.	Molecular Function: protein binding (GO:0005515), Molecular Function: zinc ion binding (GO:0008270)
Os12g0168000	0.556562	0.000352048			5-formyltetrahydrofolate cyclo-ligase family protein.	Biological Process: folic acid-containing compound biosynthetic process (GO:0009396), Molecular Function: ATP binding (GO:0005524), Molecular Function: 5-formyltetrahydrofolate cyclo-ligase activity (GO:0030272)
Os02g0750600	0.55656	2.41222e-06			Membrane-anchored ubiquitin-fold protein, HCG-1 domain containing protein.	0
Os05g0411600	0.556264	7.42138e-06			Similar to nucleic acid binding protein.	0
Os07g0509700	0.556011	0.000332439			Peptidase S16, lon N-terminal domain containing protein.	Biological Process: proteolysis (GO:0006508), Molecular Function: ATP-dependent peptidase activity (GO:0004176)
Os11g0580800	0.554489	0.0009291			Twin-arginine translocation protein TatB family protein.	Biological Process: protein secretion (GO:0009306), Biological Process: protein transport (GO:0015031), Cellular Component: plasma membrane (GO:0005886), Cellular Component: membrane (GO:0016020), Cellular Component: integral to membrane (GO:0016021), Molecular Function: protein transporter activity (GO:0008565)
Os05g0296600	0.554229	0.00147945			Non-protein coding transcript.	0
Os01g0798500	0.554158	0.00513726			Similar to predicted protein.	0
Os04g0431000	0.554042	0.000665805			Conserved hypothetical protein.	0
Os01g0645900	0.553937	0.00513003	OsSultr5;1, OsSul5;1	_	Similar to sulfate transporter.	0
Os07g0462700	0.553352	0.00170198			Thioesterase superfamily domain containing protein.	0
Os06g0150100	0.553204	0.000324158			Conserved hypothetical protein.	0
Os03g0732200	0.553199	1.06129e-05			Similar to dynamin-2A.	0
Os02g0803400	0.552926	3.76398e-05			Vacuolar protein sorting 55 family protein.	0
Os01g0908700	0.552159	0.00044573	OsRFP	0	Similar to Hnrpa2b1-prov protein.	Molecular Function: protein binding (GO:0005515), Molecular Function: zinc ion binding (GO:0008270)
Os07g0300900	0.55196	0.000281211			Similar to Aspartokinase.	Biological Process: cellular amino acid biosynthetic process (GO:0008652), Molecular Function: aspartate kinase activity (GO:0004072)
Os12g0607400	0.551939	0.000182886			Hypothetical conserved gene.	0
Os10g0405300	0.55171	0.000116737			Pathogenic type III effector avirulence factor Avr cleavage site domain containing protein.	0
Os05g0569300	0.551217	8.6687e-07	OsbZIP45	b-ZIP TRANSCRIPTION FACTOR 45	Similar to G-box binding factor 1.	Biological Process: transcription, DNA-dependent (GO:0006351), Biological Process: regulation of transcription, DNA-dependent (GO:0006355), Cellular Component: nucleus (GO:0005634), Molecular Function: DNA binding (GO:0003677), Molecular Function: sequence-specific DNA binding transcription factor activity (GO:0003700), Molecular Function: sequence-specific DNA binding (GO:0043565), Molecular Fun…
Os03g0285800	0.551057	0.00738437	OsMSRMK2, OsMAPK5, OsMAP1, OsMPK3, OsBIMK1, OsMAPK2, MPK5, BIMK1, MAPK2, MAPK5, MPK3, OsMPK5, OsMAPK3, OsMAPK5b, MAPK3	MULTIPLE STRESS RESPONSIVE MAP KINASE 2	MAP Kinase.	Biological Process: protein phosphorylation (GO:0006468), Molecular Function: protein kinase activity (GO:0004672), Molecular Function: protein serine/threonine kinase activity (GO:0004674), Molecular Function: MAP kinase activity (GO:0004707), Molecular Function: protein tyrosine kinase activity (GO:0004713), Molecular Function: ATP binding (GO:0005524), Molecular Function: transferase activity,…
Os02g0581500	0.551015	0.00568948			Alpha/beta hydrolase fold-1 domain containing protein.	Biological Process: menaquinone biosynthetic process (GO:0009234), Molecular Function: 2-succinyl-6-hydroxy-2, 4-cyclohexadiene-1-carboxylate synthase activity (GO:0070205)
Os05g0542900	0.550534	0.00283882			Pectin lyase fold domain containing protein.	Biological Process: carbohydrate metabolic process (GO:0005975), Molecular Function: polygalacturonase activity (GO:0004650)
Os06g0191300	0.549982	0.00391828	OsMKK5	0	Similar to Mitogen-activated protein kinase kinase 4 (Fragment).	Biological Process: protein phosphorylation (GO:0006468), Molecular Function: protein kinase activity (GO:0004672), Molecular Function: protein serine/threonine kinase activity (GO:0004674), Molecular Function: ATP binding (GO:0005524), Molecular Function: transferase activity, transferring phosphorus-containing groups (GO:0016772)
Os07g0619200	0.549707	0.00228283			EF hand domain containing protein.	Molecular Function: calcium ion binding (GO:0005509)
Os03g0654800	0.549309	0.000666765			Conserved hypothetical protein.	0
Os05g0501200	0.549099	0.00198966	OsbHLH067	0	Hypothetical conserved gene.	0
Os02g0674400	0.549087	0.00791573			Conserved hypothetical protein.	0
Os11g0219000	0.549021	0.00187854	OsClp12, CLP12	0	Peptidase S16, lon N-terminal domain containing protein.	Biological Process: proteolysis (GO:0006508), Molecular Function: ATP-dependent peptidase activity (GO:0004176)
Os10g0378100	0.54897	0.00584345			Similar to Cytochrome P450 family protein, expressed.	Biological Process: oxidation-reduction process (GO:0055114), Molecular Function: iron ion binding (GO:0005506), Molecular Function: electron carrier activity (GO:0009055), Molecular Function: oxidoreductase activity, acting on paired donors, with incorporation or reduction of molecular oxygen (GO:0016705), Molecular Function: heme binding (GO:0020037)
Os04g0310500	0.548811	0.000140094			NADH dehydrogenase [ubiquinone] (complex I), alpha subcomplex, subunit 2 domain containing protein.	0
Os02g0468400	0.548251	0.000214072			Lipid-binding START domain containing protein.	0
Os02g0202500	0.546823	4.52784e-05			Similar to nucleic acid binding.	0
Os01g0743800	0.546438	4.28243e-05			Similar to histidine-containing phosphotransfer protein 4.	Biological Process: two-component signal transduction system (phosphorelay) (GO:0000160), Molecular Function: signal transducer activity (GO:0004871)
Os01g0728400	0.546368	3.46599e-05			Conserved hypothetical protein.	0
Os12g0115100	0.546277	0.000668731	OsLTP1.18, OsLTP1, nsLTP1, a15, OsLtpI.18	0	Nonspecific lipid-transfer protein 1 precursor (LTP 1) (PAPI).	Biological Process: lipid transport (GO:0006869), Molecular Function: lipid binding (GO:0008289)
Os01g0666600	0.546153	0.000529434			Conserved hypothetical protein.	0
Os11g0137250	0.54596	0.00999104			Hypothetical gene.	0
Os04g0687100	0.545666	0.00786283	0	0	Similar to Soluble inorganic pyrophosphatase (EC 3.6.1.1) (Pyrophosphate phospho- hydrolase) (PPase).	0
Os05g0461400	0.545526	1.59213e-06			Similar to Histone H2A.2.1.	0
Os08g0117400	0.545495	0.00043566	OsCML7, OsSTKC	CALMODULIN-LIKE PROTEIN 7	Similar to Calmodulin 1 (Fragment).	Molecular Function: calcium ion binding (GO:0005509)
Os03g0334100	0.54516	3.82833e-06			PRC-barrel-like domain containing protein.	0
Os12g0277000	0.54502	0.000160007	OsPUB25	0	Zinc finger, RING/FYVE/PHD-type domain containing protein.	Biological Process: protein ubiquitination (GO:0016567), Cellular Component: ubiquitin ligase complex (GO:0000151), Molecular Function: ubiquitin-protein ligase activity (GO:0004842), Molecular Function: binding (GO:0005488), Molecular Function: protein binding (GO:0005515)
Os09g0553300	0.544415	5.29665e-05			NUDIX hydrolase domain containing protein.	Molecular Function: protein binding (GO:0005515), Molecular Function: hydrolase activity (GO:0016787)
Os08g0242700	0.544371	0.000107514			Similar to uridylyltransferase-related.	0
Os01g0234900	0.543901	9.24136e-05	OsRFPHC-14, OsSTA9	0	Similar to Ubiquitin ligase SINAT5 (EC 6.3.2.-) (Seven in absentia homolog 5). Splice isoform 2.	Biological Process: ubiquitin-dependent protein catabolic process (GO:0006511), Biological Process: multicellular organismal development (GO:0007275), Biological Process: protein ubiquitination (GO:0016567), Cellular Component: nucleus (GO:0005634), Molecular Function: ubiquitin-protein ligase activity (GO:0004842), Molecular Function: protein binding (GO:0005515), Molecular Function: zinc ion bi…
Os11g0546900	0.543859	0.000268155	GF14d, OsGF14d, Os14-3-3, 14-3-3d	0	Similar to TaWIN1.	Molecular Function: protein domain specific binding (GO:0019904)
Os06g0618700	0.543778	0.000996999	OsVQ24	0	VQ domain containing protein.	0
Os01g0842200	0.543653	0.000118962			Similar to Scarecrow-like 9 (Fragment).	0
Os12g0562600	0.543568	0.000497697			Similar to Protein kinase.	Biological Process: protein phosphorylation (GO:0006468), Molecular Function: protein kinase activity (GO:0004672)
Os11g0300400	0.543519	0.00295878			Similar to Catalytic/ hydrolase.	0
Os01g0266500	0.542899	0.000838822			Phenazine biosynthesis PhzC/PhzF protein family protein.	Biological Process: biosynthetic process (GO:0009058), Molecular Function: catalytic activity (GO:0003824)
Os02g0658400	0.54182	1.73264e-05			Remorin, C-terminal domain containing protein.	0
Os04g0274400	0.541407	0.00828461			Similar to OSIGBa0138E08-OSIGBa0161L23.9 protein.	0
Os03g0775000	0.540941	0.00407737			Leucine carboxyl methyltransferase domain containing protein.	Molecular Function: methyltransferase activity (GO:0008168)
Os04g0646100	0.540243	0.000701177			Similar to cDNA clone:J013093N15, full insert sequence.	Cellular Component: nucleus (GO:0005634)
Os02g0797600	0.540135	4.44062e-06			Conserved hypothetical protein.	0
Os12g0618800	0.540043	0.000368849			Protein of unknown function DUF266, plant family protein.	Cellular Component: membrane (GO:0016020), Molecular Function: acetylglucosaminyltransferase activity (GO:0008375)
Os02g0670900	0.539733	0.000220525	OsANT3	0	Similar to amino acid transport protein.	0
Os09g0416800	0.539514	1.92892e-05			Component of the CCR4-NOTcomplex, Deadenylase, Deadenylation (poly(A) tail shortening), Development and stress response	Molecular Function: nucleic acid binding (GO:0003676), Cellular Component: nucleus (GO:0005634)
Os06g0600800	0.538986	0.00388262			Hypothetical protein.	0
Os10g0569000	0.538809	6.37247e-05			Hypothetical conserved gene.	0
Os06g0334400	0.538805	4.44572e-05	CDKF;1, Orysa;CDKF;1, CDKF1, CDKF-1/CAK1AT, CDKF-1, CAK1AT, CAK1A	CYCLIN-DEPENDENT KINASE F;1	Similar to Cdk-activating kinase 1At (Cdk-activating kinase CAK1At).	Biological Process: protein phosphorylation (GO:0006468), Molecular Function: protein kinase activity (GO:0004672), Molecular Function: protein serine/threonine kinase activity (GO:0004674), Molecular Function: ATP binding (GO:0005524), Molecular Function: transferase activity, transferring phosphorus-containing groups (GO:0016772)
Os05g0425700	0.53774	0.000142887	OsFbox258, Os_F0658	0	Similar to F-box protein AtFBL5.	0
Os05g0414100	0.537732	5.38703e-06			Hypothetical conserved gene.	0
Os02g0190800	0.537647	3.57155e-06			Alpha/beta hydrolase fold-1 domain containing protein.	0
Os02g0245800	0.537646	0.00633986	OsKAT3	_	Inward rectifying shaker-like potassium channel, Negative regulation of OsKAT2 channel activity	Biological Process: ion transport (GO:0006811), Biological Process: potassium ion transport (GO:0006813), Biological Process: transmembrane transport (GO:0055085), Molecular Function: ion channel activity (GO:0005216), Molecular Function: voltage-gated potassium channel activity (GO:0005249), Cellular Component: membrane (GO:0016020)
Os10g0213100	0.537593	0.00013427			Similar to Gamma-aminobutyrate transaminase subunit isozyme 3 (EC 2.6.1.19).	Molecular Function: catalytic activity (GO:0003824), Molecular Function: transaminase activity (GO:0008483), Molecular Function: pyridoxal phosphate binding (GO:0030170)
Os11g0127900	0.53754	0.0005717	OsRP1	0	Similar to 40S ribosomal protein S16.	Biological Process: translation (GO:0006412), Cellular Component: intracellular (GO:0005622), Cellular Component: ribosome (GO:0005840), Molecular Function: structural constituent of ribosome (GO:0003735)
Os03g0729300	0.537296	0.000153409			Thioredoxin-like fold domain containing protein.	Biological Process: oxidation-reduction process (GO:0055114), Molecular Function: antioxidant activity (GO:0016209), Molecular Function: oxidoreductase activity (GO:0016491)
Os03g0234200	0.537268	0.000169902	ZIURP1, Ub-CEP52-1	0	Similar to Ubiquitin fusion protein (Fragment).	Biological Process: translation (GO:0006412), Cellular Component: ribosome (GO:0005840), Molecular Function: structural constituent of ribosome (GO:0003735)
Os01g0152700	0.536918	0.000939265			Similar to Histone H2B (CaH2B).	Biological Process: nucleosome assembly (GO:0006334), Cellular Component: nucleosome (GO:0000786), Cellular Component: nucleus (GO:0005634), Molecular Function: DNA binding (GO:0003677)
Os05g0337500	0.536858	0.000581941			Hypothetical conserved gene.	0
Os03g0715332	0.536551	0.00751953			Hypothetical conserved gene.	0
Os04g0592400	0.536472	4.56389e-05			t-snare domain containing protein.	0
Os02g0595400	0.53641	0.00508316			Conserved hypothetical protein.	0
Os09g0115500	0.536133	4.79497e-05	OsCBSX2	_	Proteinase inhibitor I3, Kunitz legume domain containing protein.	Molecular Function: protein binding (GO:0005515)
Os03g0259700	0.536064	0.000116125			Protein of unknown function DUF1630 family protein.	0
Os01g0136400	0.536013	0.00144547	OsWAK1, WAK-1	WALL-ASSOCIATED KINASE 1	Protein kinase, core domain containing protein.	Biological Process: protein phosphorylation (GO:0006468), Molecular Function: protein kinase activity (GO:0004672), Molecular Function: protein serine/threonine kinase activity (GO:0004674), Molecular Function: ATP binding (GO:0005524), Molecular Function: transferase activity, transferring phosphorus-containing groups (GO:0016772)
Os01g0805200	0.535443	0.000304825			Protein of unknown function DUF3007 domain containing protein.	0
Os04g0652400	0.535407	3.87041e-05	OsSultr3;3, OsSul3;3, SULTR3;3	SULPHATE TRANSPORTER 3;3	Ortholog of the sulfate transporter family group 3 , Grain metabolism	Biological Process: sulfate transport (GO:0008272), Biological Process: transmembrane transport (GO:0055085), Molecular Function: secondary active sulfate transmembrane transporter activity (GO:0008271), Molecular Function: sulfate transmembrane transporter activity (GO:0015116), Cellular Component: membrane (GO:0016020), Cellular Component: integral component of membrane (GO:0016021)
Os02g0707900	0.535139	0.00188236			Rossmann-like alpha/beta/alpha sandwich fold domain containing protein.	Biological Process: response to stress (GO:0006950)
Os03g0332100	0.534725	0.00794354	CYP714B2	CYTOCHROME P450 714B2	Similar to Cytochrome P450 CYP714B3.	Biological Process: oxidation-reduction process (GO:0055114), Molecular Function: iron ion binding (GO:0005506), Molecular Function: electron carrier activity (GO:0009055), Molecular Function: oxidoreductase activity, acting on paired donors, with incorporation or reduction of molecular oxygen (GO:0016705), Molecular Function: heme binding (GO:0020037)
Os07g0155100	0.534607	0.00322112			FAD dependent oxidoreductase family protein.	Biological Process: oxidation-reduction process (GO:0055114), Molecular Function: oxidoreductase activity (GO:0016491)
Os06g0555400	0.534546	0.000715863			Similar to 40S ribosomal protein S19-like.	Biological Process: translation (GO:0006412), Cellular Component: intracellular (GO:0005622), Cellular Component: ribosome (GO:0005840), Molecular Function: nucleotide binding (GO:0000166), Molecular Function: structural constituent of ribosome (GO:0003735)
Os09g0567366	0.534352	0.00156496			Similar to Aldo-keto reductase/ oxidoreductase.	0
Os08g0444100	0.534015	0.000118984			Similar to Splicing factor 3b, subunit 5 (Splicing factor 3B subunit 10).	0
Os07g0238800	0.533805	0.00976682			Protein of unknown function DUF1723 domain containing protein.	0
Os04g0434800	0.533316	0.00206465	OsAPx7, OsAPx07, OSAPX7, APx7, sAPX	ASCORBATE PEROXIDASE 7	Similar to Thylakoid-bound ascorbate peroxidase (EC 1.11.1.11) (Fragment).	Biological Process: response to oxidative stress (GO:0006979), Biological Process: oxidation-reduction process (GO:0055114), Molecular Function: peroxidase activity (GO:0004601), Molecular Function: heme binding (GO:0020037)
Os11g0528300	0.53316	0.000138919			Protein of unknown function DUF339 family protein.	0
Os03g0249200	0.53267	0.0034176			Class I peptide chain release factor domain containing protein.	Biological Process: translational termination (GO:0006415), Molecular Function: translation release factor activity (GO:0003747)
Os03g0710600	0.532468	6.80449e-05			Conserved hypothetical protein.	0
Os03g0727100	0.532216	0.00150009			Conserved hypothetical protein.	0
Os02g0602400	0.532007	8.10146e-05			Mitochodrial transcription termination factor-related family protein.	0
Os02g0310200	0.531902	0.000353341			Conserved hypothetical protein.	0
Os12g0564400	0.531899	0.0036243	PsbP	0	Similar to Thylakoid lumenal 21.5 kDa protein, chloroplast precursor.	Biological Process: photosynthesis (GO:0015979), Cellular Component: photosystem II (GO:0009523), Cellular Component: oxygen evolving complex (GO:0009654), Cellular Component: extrinsic to membrane (GO:0019898), Molecular Function: calcium ion binding (GO:0005509)
Os12g0131000	0.531794	0.00159582			Hypothetical conserved gene.	Molecular Function: nucleotide binding (GO:0000166), Molecular Function: nucleic acid binding (GO:0003676)
Os05g0565000	0.531758	0.00350568	rpl18a	RIBOSOMAL PROTEIN L18A	Similar to 60S ribosomal protein L18a-1.	Biological Process: translation (GO:0006412), Cellular Component: ribosome (GO:0005840), Molecular Function: structural constituent of ribosome (GO:0003735)
Os05g0126300	0.531606	4.6421e-06			Conserved hypothetical protein.	0
Os02g0125000	0.531419	0.00124069			Similar to LPA2 (low psii accumulation2).	0
Os04g0678200	0.531348	0.00109573			Protein of unknown function DUF1218 family protein.	0
Os12g0533500	0.530991	0.00495407	OsVIL1, VIL1, OsVIL2	0	Protein containing PHD domain, FNIII domain and VID domain, Positive regulator of flowering	Molecular Function: protein binding (GO:0005515)
Os12g0175500	0.530936	0.0015869	OsGRX27	GLUTAREDOXIN 27	Similar to Glutaredoxin-like protein.	Biological Process: cell redox homeostasis (GO:0045454), Molecular Function: electron carrier activity (GO:0009055), Molecular Function: protein disulfide oxidoreductase activity (GO:0015035)
Os05g0533500	0.530827	0.000838723			Similar to Serine acetyltransferase.	Biological Process: cysteine biosynthetic process from serine (GO:0006535), Cellular Component: cytoplasm (GO:0005737), Molecular Function: serine O-acetyltransferase activity (GO:0009001), Molecular Function: transferase activity (GO:0016740)
Os02g0128200	0.530792	2.30213e-05	OsbZIP13	b-ZIP TRANSCRIPTION FACTOR 13	Similar to Transcription factor HBP-1a (Histone-specific transcription factor HBP1).	Biological Process: transcription, DNA-dependent (GO:0006351), Biological Process: regulation of transcription, DNA-dependent (GO:0006355), Cellular Component: nucleus (GO:0005634), Molecular Function: DNA binding (GO:0003677), Molecular Function: sequence-specific DNA binding transcription factor activity (GO:0003700), Molecular Function: sequence-specific DNA binding (GO:0043565), Molecular Fun…
Os06g0217600	0.530699	0.000469035			Similar to kinesin motor protein-related.	0
Os02g0510100	0.530639	3.94674e-05	OsCYP-7	CYCLOPHILIN 7	Similar to U6 snRNA-associated Sm-like protein LSm6 (Sm protein F).	0
Os01g0761000	0.530321	0.00754682			Conserved hypothetical protein.	0
Os08g0483200	0.530176	8.64101e-05			Nucleotide-binding, alpha-beta plait domain containing protein.	Molecular Function: nucleotide binding (GO:0000166), Molecular Function: nucleic acid binding (GO:0003676)
Os06g0163600	0.52936	0.00258758			Similar to predicted protein.	0
Os04g0379700	0.529035	0.00112826	RVDE1	0	Similar to Violaxanthin de-epoxidase.	Biological Process: oxidation-reduction process (GO:0055114), Cellular Component: chloroplast (GO:0009507), Molecular Function: binding (GO:0005488), Molecular Function: violaxanthin de-epoxidase activity (GO:0046422)
Os08g0497600	0.529004	0.000723603	SRWD1, OsWD40-162	SALT RESPONSIVE WD40 PROTEIN 1	WD40 subfamily protein, Salt stress	Molecular Function: protein binding (GO:0005515)
Os06g0687900	0.528879	7.46811e-05	OsIRX14, IRX14, OsGT43J, GT43J, OsGT43J/OsIRX14	0	Similar to UDP-glucuronyltransferase-l.	Cellular Component: membrane (GO:0016020), Molecular Function: galactosylgalactosylxylosylprotein 3-beta-glucuronosyltransferase activity (GO:0015018)
Os06g0146300	0.527317	0.00027146			Conserved hypothetical protein.	0
Os02g0815700	0.527286	5.38703e-06	OsCttP2, CTTP2	0	Similar to D1 protease (Fragment).	0
Os02g0180000	0.526887	6.1469e-05	OsPP2C11, PP2C11, OsPP19	0	Similar to Protein phosphatase type-2C.	Biological Process: protein dephosphorylation (GO:0006470), Cellular Component: protein serine/threonine phosphatase complex (GO:0008287), Molecular Function: catalytic activity (GO:0003824), Molecular Function: protein serine/threonine phosphatase activity (GO:0004722)
Os11g0638900	0.526017	0.000286992			Armadillo-type fold domain containing protein.	Molecular Function: binding (GO:0005488)
Os04g0477900	0.52554	3.73723e-05			Similar to Cysteine proteinase EP-B 1 precursor (EC 3.4.22.-).	0
Os05g0200280	0.525441	0.00162184			Similar to prenylated rab acceptor family protein.	0
Os03g0286300	0.524822	0.000100911			Similar to Phosphate/phosphoenolpyruvate translocator protein-like.	0
Os02g0199900	0.524679	0.000718811	OsRpt4a, Rpt4a	19S REGULATORY PARTICLE ATPASE SUBUNIT 4A	Similar to 26S proteasome regulatory complex subunit p42D.	Biological Process: protein catabolic process (GO:0030163), Cellular Component: cytoplasm (GO:0005737), Molecular Function: nucleotide binding (GO:0000166), Molecular Function: ATP binding (GO:0005524), Molecular Function: hydrolase activity (GO:0016787), Molecular Function: nucleoside-triphosphatase activity (GO:0017111)
Os03g0773800	0.524503	0.000333819	0	0	Similar to Malate dehydrogenase, glyoxysomal precursor (EC 1.1.1.37) (mbNAD-MDH).	Biological Process: carbohydrate metabolic process (GO:0005975), Biological Process: malate metabolic process (GO:0006108), Biological Process: cellular carbohydrate metabolic process (GO:0044262), Biological Process: oxidation-reduction process (GO:0055114), Molecular Function: nucleotide binding (GO:0000166), Molecular Function: catalytic activity (GO:0003824), Molecular Function: oxidoreductas…
Os03g0320900	0.524223	0.00570644	v2, mGmk, GMK, Gmk, pt/mtGK, pt/mt GK	GUANYLATE KINASE	Guanylate kinase family protein.	Biological Process: purine nucleotide metabolic process (GO:0006163), Molecular Function: guanylate kinase activity (GO:0004385), Molecular Function: protein binding (GO:0005515)
Os09g0131000	0.524216	0.00158244			Conserved hypothetical protein.	0
Os08g0433600	0.523941	5.68644e-07			Protein of unknown function DUF962 family protein.	0
Os10g0498800	0.523684	0.0060198			Protein of unknown function DUF974 family protein.	0
Os03g0704100	0.522814	0.000418974			Similar to structural molecule.	Cellular Component: chloroplast (GO:0009507), Molecular Function: structural molecule activity (GO:0005198)
Os04g0459200	0.522496	0.00861957			Hypothetical protein.	0
Os02g0606800	0.522483	4.49944e-06			Isochorismatase hydrolase family protein.	Biological Process: metabolic process (GO:0008152), Molecular Function: catalytic activity (GO:0003824)
Os03g0295500	0.522377	0.00834674			CHCH domain containing protein.	0
Os12g0104800	0.522183	3.31603e-05			Similar to Clathrin heavy chain.	0
Os05g0492500	0.521518	0.00882865			Hypothetical protein.	0
Os01g0866300	0.521241	0.00015637			VAMP-like protein YKT61 (AtYKT61) (Geranylgeranylated protein 1) (AtGP1).	Biological Process: transport (GO:0006810), Biological Process: vesicle-mediated transport (GO:0016192), Cellular Component: integral to membrane (GO:0016021)
Os01g0757900	0.520544	0.00217017			Haloacid dehalogenase/epoxide hydrolase domain containing protein.	Biological Process: metabolic process (GO:0008152), Molecular Function: catalytic activity (GO:0003824), Molecular Function: hydrolase activity (GO:0016787)
Os08g0512500	0.520425	0.000873347			Similar to Thylakoid lumen protein, chloroplast.	Biological Process: photosynthesis (GO:0015979), Cellular Component: photosystem II (GO:0009523), Cellular Component: oxygen evolving complex (GO:0009654), Cellular Component: extrinsic to membrane (GO:0019898), Molecular Function: calcium ion binding (GO:0005509)
Os01g0835900	0.519704	0.00405319	0	0	Similar to Histone H4.	Biological Process: nucleosome assembly (GO:0006334), Cellular Component: nucleosome (GO:0000786), Cellular Component: nucleus (GO:0005634), Molecular Function: DNA binding (GO:0003677)
Os01g0826900	0.519391	3.47273e-07			Domain of unknown function DUF399 domain containing protein.	0
Os02g0129900	0.519379	0.0022311			Similar to hydrolase, acting on ester bonds.	Biological Process: GPI anchor metabolic process (GO:0006505), Biological Process: intracellular protein transport (GO:0006886), Cellular Component: intrinsic to endoplasmic reticulum membrane (GO:0031227), Molecular Function: hydrolase activity, acting on ester bonds (GO:0016788)
Os03g0293100	0.519214	0.00438359			Conserved hypothetical protein.	0
Os12g0429950	0.518682	0.00667674			Hypothetical gene.	0
Os06g0626200	0.518618	0.00856301			Similar to cDNA, clone: J065099M17, full insert sequence.	0
Os08g0463900	0.518589	0.00130583			Heat shock protein DnaJ, cysteine-rich region domain containing protein.	Molecular Function: heat shock protein binding (GO:0031072), Molecular Function: unfolded protein binding (GO:0051082)
Os06g0715500	0.518551	0.00493764			Similar to Translocon-associated protein alpha subunit precursor (TRAP-alpha) (Signal sequence receptor alpha subunit) (SSR-alpha).	Cellular Component: endoplasmic reticulum (GO:0005783)
Os05g0419600	0.517939	0.00381927			Conserved hypothetical protein.	0
Os05g0349200	0.517781	5.42091e-05			Similar to AMP deaminase 1 (EC 3.5.4.6) (Myoadenylate deaminase) (AMP deaminase isoform M).	Biological Process: purine ribonucleoside monophosphate biosynthetic process (GO:0009168), Molecular Function: deaminase activity (GO:0019239)
Os02g0831800	0.517579	0.00740823			Similar to 3-hydroxy-3-methylglutaryl-coenzyme A reductase 2.	Biological Process: threonine metabolic process (GO:0006566), Biological Process: phosphorylation (GO:0016310), Molecular Function: homoserine kinase activity (GO:0004413), Molecular Function: ATP binding (GO:0005524), Molecular Function: kinase activity (GO:0016301)
Os01g0768600	0.517369	0.00348166			Conserved hypothetical protein.	0
Os04g0614700	0.517322	0.000209125			Similar to OSIGBa0126B18.8 protein.	0
Os01g0559100	0.517279	0.00356092			Similar to Seryl-tRNA synthetase (EC 6.1.1.11) (Serine--tRNA ligase) (SerRS) (Fragment).	Biological Process: tRNA aminoacylation for protein translation (GO:0006418), Biological Process: seryl-tRNA aminoacylation (GO:0006434), Cellular Component: cytoplasm (GO:0005737), Molecular Function: nucleotide binding (GO:0000166), Molecular Function: aminoacyl-tRNA ligase activity (GO:0004812), Molecular Function: serine-tRNA ligase activity (GO:0004828), Molecular Function: ATP binding (GO:0…
Os09g0344900	0.517189	0.000635765			Zinc finger, RING/FYVE/PHD-type domain containing protein.	Molecular Function: protein binding (GO:0005515), Molecular Function: zinc ion binding (GO:0008270)
Os01g0551100	0.517175	0.000448856			Ribonuclease III domain containing protein.	Biological Process: RNA processing (GO:0006396), Biological Process: rRNA catabolic process (GO:0016075), Molecular Function: RNA binding (GO:0003723), Molecular Function: ribonuclease III activity (GO:0004525)
Os03g0405100	0.517118	0.00430265			Ubiquinone biosynthesis protein COQ9 domain containing protein.	Biological Process: ubiquinone biosynthetic process (GO:0006744)
Os03g0634000	0.517107	0.00121692			Similar to THA4.	Biological Process: protein secretion (GO:0009306), Biological Process: protein transport (GO:0015031), Cellular Component: plasma membrane (GO:0005886), Cellular Component: membrane (GO:0016020), Cellular Component: integral to membrane (GO:0016021), Molecular Function: protein transporter activity (GO:0008565)
Os10g0545700	0.517062	3.96556e-05	CDC25.1, OsACR2.1, OsStr20, STR20	ARSENATE REDUCTASE 1	Similar to Rhodanese-like protein.	0
Os02g0799700	0.516902	0.00688094			Similar to serine-rich protein.	0
Os01g0139200	0.516607	1.86749e-05			Octicosapeptide/Phox/Bem1p domain containing protein.	Molecular Function: protein binding (GO:0005515)
Os02g0107000	0.516594	5.53222e-07			Sec63 domain domain containing protein.	0
Os12g0540700	0.516347	0.0034593			Conserved hypothetical protein.	0
Os03g0670700	0.516254	0.00556958	OsGRP3, RTP, RBP-152	GLYCINE-RICH RNA-BINDING PROTEIN 3	Similar to Glycine-rich RNA-binding, abscisic acid-inducible protein.	Molecular Function: nucleotide binding (GO:0000166), Molecular Function: nucleic acid binding (GO:0003676)
Os12g0590400	0.51577	0.00026428			Conserved hypothetical protein.	0
Os03g0730000	0.515701	0.00057636			Lecithin:cholesterol acyltransferase family protein.	Biological Process: lipid metabolic process (GO:0006629), Molecular Function: O-acyltransferase activity (GO:0008374)
Os01g0102300	0.515627	0.00492887			Thylakoid lumen protein, Photosynthesis and chloroplast development	0
Os10g0508100	0.515575	0.00201002			Protein of unknown function DUF641, plant domain containing protein.	0
Os06g0225400	0.514995	0.000332004			Conserved hypothetical protein.	0
Os04g0505700	0.514696	0.00143796	OsFbox227, Os_F0286	0	Leucine-rich repeat, cysteine-containing subtype containing protein.	0
Os08g0520500	0.514647	0.000176015	OsARF7b, OsARF21	AUXIN RESPONSE FACTOR 7B	Similar to Isoform 2 of Auxin response factor 21.	0
Os05g0496000	0.514599	0.000450249			Conserved hypothetical protein.	0
Os11g0207200	0.514246	0.00042472			Similar to MAP3Ka.	Biological Process: protein phosphorylation (GO:0006468), Molecular Function: protein kinase activity (GO:0004672), Molecular Function: protein serine/threonine kinase activity (GO:0004674), Molecular Function: ATP binding (GO:0005524), Molecular Function: transferase activity, transferring phosphorus-containing groups (GO:0016772)
Os01g0832200	0.514182	0.000324386			Similar to selT-like protein.	Biological Process: cell redox homeostasis (GO:0045454), Molecular Function: selenium binding (GO:0008430)
Os05g0121600	0.514123	2.04192e-05	AP2/EREBP#090, AP2/EREBP90, OsTOE1, TOE1, qHD5, AP2-1	RICE STRACH REGULATOR 1	AP2/EREBP family transcription factor, Starch biosynthesis	Biological Process: regulation of transcription, DNA-dependent (GO:0006355), Molecular Function: DNA binding (GO:0003677), Molecular Function: sequence-specific DNA binding transcription factor activity (GO:0003700)
Os02g0179100	0.513854	0.000234902			Metal-dependent phosphohydrolase, HD region domain containing protein.	Molecular Function: catalytic activity (GO:0003824), Molecular Function: phosphoric diester hydrolase activity (GO:0008081), Molecular Function: metal ion binding (GO:0046872)
Os07g0530300	0.513448	3.41212e-05			Protein of unknown function DUF1715, eukaryotic family protein.	0
Os01g0190000	0.513151	0.000164637			Similar to oxidoreductase.	Biological Process: oxidation-reduction process (GO:0055114), Molecular Function: oxidoreductase activity (GO:0016491)
Os05g0115800	0.513046	1.46849e-05	OsMKP1, osmkp1	MITOGEN-ACTIVATED PROTEIN KINASE PHOSPHATASE 1	Similar to MAP kinase phosphatase (Fragment).	0
Os02g0164800	0.512598	0.00371074			Zinc finger, C2H2-type domain containing protein.	0
Os02g0674700	0.512253	0.000430024			Similar to protein binding protein.	Molecular Function: protein binding (GO:0005515), Molecular Function: zinc ion binding (GO:0008270)
Os05g0209400	0.512202	0.00281731			Similar to Nudix hydrolase 15, mitochondrial precursor (EC 3.6.1.-) (AtNUDT15).	Molecular Function: hydrolase activity (GO:0016787)
Os04g0639300	0.511971	0.00628763			Conserved hypothetical protein.	0
Os07g0174766	0.511372	0.00651815			Hypothetical conserved gene.	0
Os02g0781700	0.511211	2.12736e-05			Conserved hypothetical protein.	0
Os01g0174100	0.511117	0.00105249			Conserved hypothetical protein.	0
Os02g0739100	0.510727	0.00611141			Similar to Formin-like protein 16.	0
Os06g0318600	0.510622	0.00233464	OsCttP3, CTTP3	0	Peptidase S41 domain containing protein.	Biological Process: proteolysis (GO:0006508), Molecular Function: protein binding (GO:0005515), Molecular Function: serine-type peptidase activity (GO:0008236)
Os04g0597000	0.510386	3.65721e-05			Similar to Secretory carrier membrane protein.	Biological Process: protein transport (GO:0015031), Cellular Component: integral to membrane (GO:0016021)
Os08g0453200	0.510165	0.000403028			Similar to Auxin-repressed protein.	0
Os06g0667500	0.51013	0.00741264			Similar to 14 kDa zinc-binding protein (Protein kinase C inhibitor) (PKCI).	Molecular Function: catalytic activity (GO:0003824)
Os01g0607200	0.510127	0.00856864	OsBAT1	0	Amino acid permease subfamily protein.	Biological Process: amino acid transmembrane transport (GO:0003333), Biological Process: transport (GO:0006810), Biological Process: amino acid transport (GO:0006865), Biological Process: transmembrane transport (GO:0055085), Cellular Component: membrane (GO:0016020), Cellular Component: integral to membrane (GO:0016021), Molecular Function: amino acid transmembrane transporter activity (GO:00151…
Os12g0287200	0.509786	0.000178875	mago, OsMAGO2, MAGO2	0	Core subunit of exon junction complex (EJC), Multiple organ development and reproduction	Cellular Component: nucleus (GO:0005634)
Os03g0780600	0.509506	0.00407262	OsTUB7, TUBB7, pTUB22	BETA-TUBULIN 7	Tubulin beta-1 chain (Beta-1 tubulin).	Biological Process: GTP catabolic process (GO:0006184), Biological Process: microtubule-based process (GO:0007017), Biological Process: microtubule-based movement (GO:0007018), Biological Process: protein polymerization (GO:0051258), Cellular Component: microtubule (GO:0005874), Cellular Component: protein complex (GO:0043234), Molecular Function: GTPase activity (GO:0003924), Molecular Function:…
Os06g0199500	0.508829	0.000252906	OsHAL3, HAL3	0	Halotolerance protein, Flavin mononucleotide (FMN)-binding protein, Regulation of cell division, Light-regulated growth	Molecular Function: catalytic activity (GO:0003824)
Os01g0276000	0.508459	0.00081988			Similar to 60S ribosomal protein L30.	Biological Process: translation (GO:0006412), Cellular Component: intracellular (GO:0005622), Cellular Component: ribosome (GO:0005840), Molecular Function: structural constituent of ribosome (GO:0003735)
Os11g0104050	0.508051	0.0031422			Preprotein translocase Sec, Sec61-beta subunit, eukarya domain containing protein.	0
Os10g0213800	0.508006	7.82118e-06			Hypothetical conserved gene.	0
Os07g0173200	0.507966	2.7948e-06			Hypothetical conserved gene.	0
Os03g0595800	0.507573	7.66116e-05			Similar to Acyl carrier protein (ACP).	0
Os09g0560400	0.507212	0.00263135			Hypothetical conserved gene.	0
Os03g0175600	0.507164	9.35102e-05			Similar to Nit protein 2 (CUA002).	Biological Process: nitrogen compound metabolic process (GO:0006807), Molecular Function: hydrolase activity, acting on carbon-nitrogen (but not peptide) bonds (GO:0016810)
Os06g0582400	0.506295	0.00134393			Conserved hypothetical protein.	0
Os03g0249900	0.506273	0.00256824			Conserved hypothetical protein.	0
Os04g0445200	0.506163	0.00803836			RmlC-like jelly roll fold domain containing protein.	0
Os11g0227000	0.506139	0.0078276			Conserved hypothetical protein.	0
Os08g0249400	0.505458	0.00110729			Hypothetical conserved gene.	0
Os04g0319600	0.505285	0.0080306			tRNA methyltransferase complex GCD14 subunit domain containing protein.	Biological Process: tRNA methylation (GO:0030488), Molecular Function: tRNA (adenine-N1-)-methyltransferase activity (GO:0016429)
Os03g0843200	0.505042	0.000767208			Protein of unknown function DUF901 family protein.	0
Os01g0902300	0.504653	0.000750895			Alpha/beta hydrolase fold-3 domain containing protein.	Biological Process: metabolic process (GO:0008152), Molecular Function: hydrolase activity (GO:0016787)
Os01g0650700	0.504207	0.000102797			Transposase, Ptta/En/Spm, plant domain containing protein.	0
Os09g0116600	0.504177	0.00184682			Hypothetical gene.	0
Os01g0182200	0.5039	0.000655006	OsSIP1;1, SIP1-1	SMALL AND BASIC INTRINSIC PROTEIN 1;1	Similar to cDNA clone:001-208-D07, full insert sequence.	Biological Process: transport (GO:0006810), Cellular Component: membrane (GO:0016020), Molecular Function: transporter activity (GO:0005215)
Os09g0560800	0.503683	0.00550525			Molybdenum cofactor sulfurase, C-terminal domain containing protein.	Molecular Function: catalytic activity (GO:0003824), Molecular Function: molybdenum ion binding (GO:0030151), Molecular Function: pyridoxal phosphate binding (GO:0030170)
Os05g0381500	0.503513	0.00202644			Similar to predicted protein.	0
Os04g0490800	0.503368	0.00129761	Os4NPP1, 4NPP1	0	Haloacid dehalogenase-like hydrolase domain containing protein.	Biological Process: metabolic process (GO:0008152), Molecular Function: hydrolase activity (GO:0016787), Molecular Function: phosphatase activity (GO:0016791)
Os07g0469600	0.503214	0.0030349			Non-protein coding transcript.	0
Os12g0616600	0.502133	0.000226983	OsDegp15, DEGP15, OsDeg5	0	Similar to protease Do-like 5.	Molecular Function: catalytic activity (GO:0003824)
Os02g0768600	0.502087	0.000403028			Similar to Chloroplast inorganic pyrophosphatase (EC 3.6.1.1).	Biological Process: phosphate-containing compound metabolic process (GO:0006796), Cellular Component: cytoplasm (GO:0005737), Molecular Function: magnesium ion binding (GO:0000287), Molecular Function: inorganic diphosphatase activity (GO:0004427)
Os10g0324600	0.501937	0.00153612			Zinc finger, C2H2-like domain containing protein.	Cellular Component: intracellular (GO:0005622), Molecular Function: nucleic acid binding (GO:0003676), Molecular Function: zinc ion binding (GO:0008270)
Os03g0737000	0.501871	4.94178e-06	OsCBSX4, OsCBSX4a, OsCBSX4b, OsCBSX4c, OsCBSX4d, OsCBSX4e, OsCBSX4f	_	Cystathionine beta-synthase, core domain containing protein.	Biological Process: metabolic process (GO:0008152), Molecular Function: catalytic activity (GO:0003824), Molecular Function: protein binding (GO:0005515)
Os01g0558900	0.501543	0.000244123			Conserved hypothetical protein.	0
Os02g0830900	0.501295	1.45578e-05			Similar to binding.	0
[truncated: 2,986 more rows]
