# Supplementary material for: Paraburkholderia phytofirmans PsJN colonization of rice endosphere triggers an atypical transcriptomic response compared to rice native Burkholderia s.l. endophytes
Source: Sci Rep. 2023 Jul 3;13:10696. doi: 10.1038/s41598-023-37314-7 (PMC10317989; doi:10.1038/s41598-023-37314-7)
Supplement: Supplementary file 9 — Supplementary Table S3. [file 41598_2023_37314_MOESM9_ESM.xlsx]

## Sheet: Feuil1
Supplementary Table S3: Rice genes significantly differentially expressed in roots in response to PsjN root inoculation with an FDR adjusted p-value inferior to 0,01.
Gene ID	log2FoldChange	padj		Gene Name	Annotation	GO Term
Os02g0650300	4.81079	0.000572885	OsYSL15, OsYs7	IRON-PHYTOSIDEROPHORE TRANSPORTER YSL15	Iron-phytosiderophore transporter, Iron homeostasis	Biological Process: transmembrane transport (GO:0055085)
Os11g0259700	2.79561	9.88715e-06			Similar to SAM dependent carboxyl methyltransferase family protein.	Molecular Function: methyltransferase activity (GO:0008168)
Os06g0315000	2.66507	0.000223772			SAM dependent carboxyl methyltransferase domain containing protein.	Molecular Function: methyltransferase activity (GO:0008168)
Os04g0634400	2.43629	9.32412e-16			Similar to H0315F07.5 protein.	Biological Process: protein phosphorylation (GO:0006468), Biological Process: recognition of pollen (GO:0048544), Molecular Function: protein kinase activity (GO:0004672), Molecular Function: protein serine/threonine kinase activity (GO:0004674), Molecular Function: protein tyrosine kinase activity (GO:0004713), Molecular Function: ATP binding (GO:0005524), Molecular Function: sugar binding (GO:0…
Os12g0204100	2.29945	2.55273e-05	OsNIP3;5, NIP3-5	NOD26 LIKE INTRINSIC PROTEIN 3;5	Similar to Major intrinsic protein, expressed.	Biological Process: transport (GO:0006810), Cellular Component: membrane (GO:0016020), Molecular Function: transporter activity (GO:0005215)
Os06g0573900	2.16488	2.73013e-08			Similar to 1-aminocyclopropane-1-carboxylic acid oxidase.	Biological Process: oxidation-reduction process (GO:0055114), Molecular Function: oxidoreductase activity (GO:0016491), Molecular Function: oxidoreductase activity, acting on paired donors, with incorporation or reduction of molecular oxygen, 2-oxoglutarate as one donor, and incorporation of one atom each of oxygen into both donors (GO:0016706)
Os08g0152000	1.94804	5.8336e-05	OsNIP3;2, NIP3-2, OsNIP3.2, NIP3.2	NOD26 LIKE INTRINSIC PROTEIN 3;2	Nodulin 26-like intrinsic membrane protein, Arsenite (As(III)) uptake by lateral roots	Biological Process: transport (GO:0006810), Molecular Function: transporter activity (GO:0005215), Cellular Component: membrane (GO:0016020)
Os11g0426400	1.93573	6.66571e-07	OsUCL34	UCLACYANIN-LIKE PROTEIN 34	Cupredoxin domain containing protein.	Molecular Function: copper ion binding (GO:0005507), Molecular Function: electron carrier activity (GO:0009055)
Os09g0409100	1.88792	0.000989928			Conserved hypothetical protein.
Os12g0589000	1.80927	0.0014044	OsbHLH130, bHLH130, OsRSL9, RSL9	0	Similar to Helix-loop-helix DNA-binding domain containing protein.	Biological Process: regulation of transcription, DNA-dependent (GO:0006355)
Os12g0198900	1.80528	0.00181198			Similar to NB-ARC domain containing protein.	Biological Process: defense response (GO:0006952), Molecular Function: ADP binding (GO:0043531)
Os06g0534200	1.8026	0.000877623			Conserved hypothetical protein.
Os09g0551251	1.79371	2.5123e-05			Similar to H0105C05.10 protein.	Biological Process: protein phosphorylation (GO:0006468), Biological Process: recognition of pollen (GO:0048544), Molecular Function: protein kinase activity (GO:0004672), Molecular Function: protein serine/threonine kinase activity (GO:0004674), Molecular Function: protein tyrosine kinase activity (GO:0004713), Molecular Function: ATP binding (GO:0005524), Molecular Function: sugar binding (GO:0…
Os10g0134700	1.78024	0.000239335			Protein kinase-like domain containing protein.
Os04g0633900	1.77459	8.04943e-10			Similar to H0315F07.1 protein.	Biological Process: protein phosphorylation (GO:0006468), Biological Process: recognition of pollen (GO:0048544), Molecular Function: protein kinase activity (GO:0004672), Molecular Function: protein serine/threonine kinase activity (GO:0004674), Molecular Function: ATP binding (GO:0005524), Molecular Function: sugar binding (GO:0005529), Molecular Function: transferase activity, transferring pho…
Os01g0850550	1.75401	7.88188e-06			Similar to Laccase-6.	Biological Process: lignin catabolic process (GO:0046274), Biological Process: oxidation-reduction process (GO:0055114), Cellular Component: apoplast (GO:0048046), Molecular Function: copper ion binding (GO:0005507), Molecular Function: laccase activity (GO:0008471), Molecular Function: oxidoreductase activity (GO:0016491)
Os06g0696600	1.72025	0.00564134	OsXTH12	XYLOGLUCAN ENDOTRANSGLUCOSYLASE/HYDROLASE 12	Similar to Xyloglucan endo-transglycosylase homolog.	Biological Process: carbohydrate metabolic process (GO:0005975), Biological Process: cellular glucan metabolic process (GO:0006073), Cellular Component: cell wall (GO:0005618), Cellular Component: apoplast (GO:0048046), Molecular Function: hydrolase activity, hydrolyzing O-glycosyl compounds (GO:0004553), Molecular Function: xyloglucan:xyloglucosyl transferase activity (GO:0016762)
Os03g0196000	1.6211	0.0022366	OsSultr1;2, OsSul1;2	_	Similar to Sulfate transporter.	Biological Process: transport (GO:0006810), Biological Process: sulfate transport (GO:0008272), Biological Process: transmembrane transport (GO:0055085), Cellular Component: membrane (GO:0016020), Cellular Component: integral to membrane (GO:0016021), Molecular Function: transporter activity (GO:0005215), Molecular Function: secondary active sulfate transmembrane transporter activity (GO:0008271)
Os04g0542800	1.61827	4.06768e-07	OsYSL16, Os-YSL16, OsYs14	PROBABLE METAL-NICOTIANAMINE TRANSPORTER YSL16	Transporter of the Copper-Nicotianamine Complex, Fe(III)-deoxymugineic acid transporter, Copper distribution, Allocation of iron	Biological Process: transmembrane transport (GO:0055085)
Os10g0105700	1.59067	4.38176e-09		Serine decarboxylase	Similar to predicted protein.	Biological Process: carboxylic acid metabolic process (GO:0019752), Molecular Function: catalytic activity (GO:0003824), Molecular Function: carboxy-lyase activity (GO:0016831), Molecular Function: pyridoxal phosphate binding (GO:0030170)
Os08g0189300	1.58531	0.0078778	OsGLP8-4, GER1	GERMIN-LIKE PROTEIN 8-4	Germin-like protein 8-4, Disease resistance	Cellular Component: apoplast (GO:0048046), Molecular Function: manganese ion binding (GO:0030145), Molecular Function: nutrient reservoir activity (GO:0045735)
Os10g0466800	1.57028	0.000309408			Conserved hypothetical protein.
Os12g0428000	1.51037	5.9213e-05	STR7	SULFURTRANSFERASE 7	Similar to senescence-associated protein DIN1.
Os10g0180800	1.49135	9.64309e-05	OsWAK112, OsWAK112d	WALL-ASSOCIATED KINASE 112	Wall-associated kinase, Negative regulation of rice blast resistance	Biological Process: protein phosphorylation (GO:0006468), Molecular Function: protein kinase activity (GO:0004672), Molecular Function: calcium ion binding (GO:0005509), Molecular Function: protein binding (GO:0005515), Molecular Function: ATP binding (GO:0005524), Molecular Function: polysaccharide binding (GO:0030247)
Os05g0231100	1.48328	5.10216e-06			Hypothetical conserved gene.	Biological Process: protein phosphorylation (GO:0006468), Molecular Function: protein kinase activity (GO:0004672), Molecular Function: protein serine/threonine kinase activity (GO:0004674), Molecular Function: protein tyrosine kinase activity (GO:0004713), Molecular Function: ATP binding (GO:0005524), Molecular Function: transferase activity, transferring phosphorus-containing groups (GO:0016772)
Os03g0339900	1.45264	2.19884e-08	OsCIPK10, CIPK10, OsCIPK10	CALCINEURIN B-LIKE PROTEIN-INTERACTING PROTEIN KINASE 10	Similar to Serine/threonine protein kinase.	Biological Process: protein phosphorylation (GO:0006468), Biological Process: signal transduction (GO:0007165), Molecular Function: protein kinase activity (GO:0004672), Molecular Function: protein serine/threonine kinase activity (GO:0004674), Molecular Function: protein tyrosine kinase activity (GO:0004713), Molecular Function: ATP binding (GO:0005524), Molecular Function: transferase activity,…
Os04g0608600	1.44629	4.75987e-06			Alkyl hydroperoxide reductase subunit C/ Thiol specific antioxidant domain containing protein.	Biological Process: oxidation-reduction process (GO:0055114), Molecular Function: antioxidant activity (GO:0016209), Molecular Function: oxidoreductase activity (GO:0016491)
Os02g0267700	1.42085	0.00844333	OsEXPA14, OsEXP14, osaEXPa1.11	ALPHA-EXPANSIN 14	Similar to Expansin-A14.	Biological Process: plant-type cell wall organization (GO:0009664), Cellular Component: extracellular region (GO:0005576)
Os12g0139400	1.41784	8.34761e-09	OsRR10, Rra2, OsRRA2, RR2	A-TYPE RESPONSE REGULATOR 10	A-type response regulator, Cytokinin signaling	Biological Process: two-component signal transduction system (phosphorelay) (GO:0000160), Biological Process: regulation of transcription, DNA-dependent (GO:0006355), Molecular Function: two-component response regulator activity (GO:0000156)
Os08g0189200	1.41771	0.0004932	OsGLP8-3, GER2	GERMIN-LIKE PROTEIN 8-3	Germin-like protein 8-3, Disease resistance	Cellular Component: apoplast (GO:0048046), Molecular Function: manganese ion binding (GO:0030145), Molecular Function: nutrient reservoir activity (GO:0045735)
Os03g0184550	1.40957	0.000609796			Similar to Dihydroflavonol-4-reductase.	Biological Process: cellular metabolic process (GO:0044237), Molecular Function: nucleotide binding (GO:0000166), Molecular Function: catalytic activity (GO:0003824), Molecular Function: coenzyme binding (GO:0050662)
Os08g0446400	1.3855	6.88089e-06			Leucine-rich repeat, N-terminal domain containing protein.	Molecular Function: protein binding (GO:0005515)
Os03g0667500	1.38216	0.00786523	OsZIP10	ZINC TRANSPORTER 10	Similar to Metal transport protein.	Biological Process: metal ion transport (GO:0030001), Biological Process: transmembrane transport (GO:0055085), Biological Process: zinc ion transmembrane transport (GO:0071577), Cellular Component: membrane (GO:0016020), Cellular Component: integral to membrane (GO:0016021), Molecular Function: zinc ion transmembrane transporter activity (GO:0005385), Molecular Function: metal ion transmembrane …
Os11g0143300	1.36293	9.27428e-11	OsRR9, Rra1, OsRRA1, OsRR10, RR10	A-TYPE RESPONSE REGULATOR 9	A-type response regulator, Cytokinin signaling	Biological Process: two-component signal transduction system (phosphorelay) (GO:0000160), Biological Process: regulation of transcription, DNA-dependent (GO:0006355), Molecular Function: two-component response regulator activity (GO:0000156)
Os03g0197100	1.31998	0.000354674			Similar to Sugar transporter protein.	Biological Process: transport (GO:0006810), Biological Process: transmembrane transport (GO:0055085), Cellular Component: membrane (GO:0016020), Cellular Component: integral to membrane (GO:0016021), Molecular Function: transporter activity (GO:0005215), Molecular Function: transmembrane transporter activity (GO:0022857), Molecular Function: substrate-specific transmembrane transporter activity (…
Os04g0455700	1.30493	0.000651936			Similar to H0523F07.3 protein.
Os04g0380300	1.30271	1.28955e-07	OsFbox203, Os_F0600	0	Kelch-type beta propeller domain containing protein.	Molecular Function: protein binding (GO:0005515)
Os01g0537250	1.29108	0.000444299			Protein of unknown function DUF3778 domain containing protein.
Os07g0442900	1.29058	2.66471e-06		CASP-like protein 1D1	Uncharacterised protein family UPF0497, trans-membrane plant subgroup domain containing protein.
Os04g0491200	1.28431	5.58159e-06			Oligopeptide transporter domain containing protein.	Biological Process: oligopeptide transport (GO:0006857), Cellular Component: membrane (GO:0016020), Molecular Function: transporter activity (GO:0005215)
Os07g0519300	1.26638	3.13582e-12			Similar to taxane 10-beta-hydroxylase.	Biological Process: oxidation-reduction process (GO:0055114), Molecular Function: iron ion binding (GO:0005506), Molecular Function: electron carrier activity (GO:0009055), Molecular Function: oxidoreductase activity, acting on paired donors, with incorporation or reduction of molecular oxygen (GO:0016705), Molecular Function: heme binding (GO:0020037)
Os07g0519100	1.26383	7.96951e-25			Similar to taxane 10-beta-hydroxylase.	Biological Process: oxidation-reduction process (GO:0055114), Molecular Function: iron ion binding (GO:0005506), Molecular Function: electron carrier activity (GO:0009055), Molecular Function: oxidoreductase activity, acting on paired donors, with incorporation or reduction of molecular oxygen (GO:0016705), Molecular Function: heme binding (GO:0020037)
Os03g0252900	1.25621	0.00431241			Similar to MYB-like transcription factor DIVARICATA.	Molecular Function: DNA binding (GO:0003677), Molecular Function: protein binding (GO:0005515)
Os09g0356000	1.25467	1.05653e-08	OsRLCK266, OsSIRK1	RECEPTOR-LIKE CYTOPLASMIC KINASE 266	Similar to OsD305.	Biological Process: protein phosphorylation (GO:0006468), Molecular Function: protein kinase activity (GO:0004672), Molecular Function: protein serine/threonine kinase activity (GO:0004674), Molecular Function: protein tyrosine kinase activity (GO:0004713), Molecular Function: ATP binding (GO:0005524), Molecular Function: transferase activity, transferring phosphorus-containing groups (GO:0016772)
Os04g0673300	1.2546	9.58186e-11	OsRR6, rr6, Rra6, OsRRA6	A-TYPE RESPONSE REGULATOR 6	A-type response regulator, Cytokinin signaling	Biological Process: two-component signal transduction system (phosphorelay) (GO:0000160), Biological Process: regulation of transcription, DNA-dependent (GO:0006355), Molecular Function: two-component response regulator activity (GO:0000156)
Os06g0272850	1.25428	0.00161862	OsTBL65	trichome birefringence-like 65	Domain of unknown function DUF231, plant domain containing protein.
Os01g0818700	1.23777	6.01634e-06			Leucine-rich repeat, N-terminal domain containing protein.	Molecular Function: protein binding (GO:0005515)
Os02g0771600	1.23229	0.00116016	OsACO3	AMINOCYCLOPROPANE-1-CARBOXYLIC ACID OXIDASE 3	Similar to 1-aminocyclopropane-1-carboxylate oxidase (Fragment).	Biological Process: oxidation-reduction process (GO:0055114), Molecular Function: oxidoreductase activity (GO:0016491), Molecular Function: oxidoreductase activity, acting on paired donors, with incorporation or reduction of molecular oxygen, 2-oxoglutarate as one donor, and incorporation of one atom each of oxygen into both donors (GO:0016706)
Os03g0554950	1.22586	0.0074488			Hypothetical conserved gene.
Os05g0472400	1.22445	0.00246169			Similar to Zinc transporter 9.	Biological Process: metal ion transport (GO:0030001), Biological Process: transmembrane transport (GO:0055085), Biological Process: zinc ion transmembrane transport (GO:0071577), Cellular Component: membrane (GO:0016020), Cellular Component: integral to membrane (GO:0016021), Molecular Function: zinc ion transmembrane transporter activity (GO:0005385), Molecular Function: metal ion transmembrane …
Os04g0439400	1.2174	0.00152912	miR1858a		Similar to H0525C06.6 protein.
Os09g0128400	1.15546	3.38278e-05			Conserved hypothetical protein.
Os05g0552600	1.13493	0.00214342			Similar to root cap periphery gene2.
Os01g0650800	1.13335	0.00807769			Transposon, En/Spm-like domain containing protein.
Os02g0153100	1.12824	0.000296311	LRK8	0	Protein kinase, core domain containing protein.	Biological Process: protein phosphorylation (GO:0006468), Molecular Function: protein kinase activity (GO:0004672), Molecular Function: protein serine/threonine kinase activity (GO:0004674), Molecular Function: protein binding (GO:0005515), Molecular Function: ATP binding (GO:0005524), Molecular Function: transferase activity, transferring phosphorus-containing groups (GO:0016772)
Os08g0374000	1.12777	1.60568e-08			Bet v I allergen family protein.	Biological Process: defense response (GO:0006952), Biological Process: response to biotic stimulus (GO:0009607)
Os08g0248700	1.11922	0.000103141			Similar to Blind.	Biological Process: regulation of transcription, DNA-dependent (GO:0006355), Molecular Function: DNA binding (GO:0003677), Molecular Function: protein binding (GO:0005515)
Os06g0727700	1.11012	0.0025805			Protein of unknown function DUF707 family protein.
Os01g0543100	1.10542	0.00764202	prx17	0	Similar to Peroxidase 72 precursor (EC 1.11.1.7) (Atperox P72) (PRXR8) (ATP6a).	Biological Process: response to oxidative stress (GO:0006979), Biological Process: oxidation-reduction process (GO:0055114), Molecular Function: peroxidase activity (GO:0004601), Molecular Function: heme binding (GO:0020037)
Os02g0257300	1.0976	0.00139326	OsStr12, Str12, TROL, Os-TROL, OsTROL	SULFURTRANSFERASE 12	Rhodanese-like domain containing protein.
Os11g0179700	1.09087	0.00502987			Similar to Dirigent-like protein.
Os02g0291400	1.06897	0.000641359	OsCBL8	CALCINEURIN B-LIKE PROTEIN 8	Similar to Calcineurin B-like protein 8.	Molecular Function: calcium ion binding (GO:0005509)
Os07g0649300	1.06733	0.00641055			Armadillo-like helical domain containing protein.	Molecular Function: binding (GO:0005488)
Os08g0101900	1.06705	0.00646806		Casparian strip membrane protein 2	UPF0497 membrane protein 2.
Os09g0536400	1.06311	1.16963e-05			Similar to Thaumatin-like protein 1 precursor.
Os11g0260100	1.06269	0.000851942			SAM dependent carboxyl methyltransferase family protein.	Molecular Function: methyltransferase activity (GO:0008168)
Os11g0618500	1.0616	0.000498332			Conserved hypothetical protein.
Os12g0610200	1.06134	0.000214623	OsPIL11, OsbHLH102	0	Similar to Phytochrome-interacting factor 3 (Phytochrome-associated protein 3) (Basic helix-loop-helix protein 8) (bHLH8) (AtbHLH008).
Os05g0148800	1.06015	0.0064178			Hypothetical conserved gene.
Os02g0708500	1.05404	0.00431241			Conserved hypothetical protein.
Os08g0263400	1.04789	0.00212343			Hypothetical protein.
Os07g0257200	1.04775	8.05737e-05	OsNRAMP5, OsNramp5	NATURAL RESISTANCE-ASSOCIATED MACROPHAGE PROTEIN 5	Manganese and Cadmium transporter, Mn and Cd uptake	Biological Process: transport (GO:0006810), Molecular Function: transporter activity (GO:0005215), Cellular Component: membrane (GO:0016020)
Os01g0921100	1.04557	7.63673e-05		Nucleotide-diphospho-sugar transferase	Hypothetical conserved gene.
Os11g0685300	1.04507	0.00141962			Hypothetical conserved gene.
Os04g0630800	1.03943	8.75184e-08			Similar to Anthocyanidin reductase.	Biological Process: cellular metabolic process (GO:0044237), Molecular Function: nucleotide binding (GO:0000166), Molecular Function: catalytic activity (GO:0003824), Molecular Function: coenzyme binding (GO:0050662)
Os03g0741050	1.03566	0.00174913			Non-protein coding transcript.
Os05g0493800	1.03162	3.04198e-10			Similar to nodulin-like protein.	Cellular Component: membrane (GO:0016020)
Os08g0398300	1.03008	1.35765e-14	OsABCA4	ABC TRANSPORTER A FAMILY MEMBER 4	ABC transporter-like domain containing protein.	Molecular Function: nucleotide binding (GO:0000166), Molecular Function: ATP binding (GO:0005524), Molecular Function: ATPase activity (GO:0016887), Molecular Function: nucleoside-triphosphatase activity (GO:0017111)
Os12g0157066	1.02552	0.000920525			Hypothetical protein.
Os08g0337001	1.02432	0.00256794			Hypothetical conserved gene.
Os09g0471550	1.01697	4.34971e-06			EGF-like calcium-binding domain containing protein.	Molecular Function: calcium ion binding (GO:0005509), Molecular Function: protein binding (GO:0005515)
Os03g0692000	1.01394	0.00428228			Glycosyl transferase, family 14 protein.	Cellular Component: membrane (GO:0016020), Molecular Function: acetylglucosaminyltransferase activity (GO:0008375)
Os09g0429400	1.00655	1.19914e-05	OsGLR2.3, GLR2.3	0	Similar to Glutamate receptor.	Biological Process: transport (GO:0006810), Cellular Component: membrane (GO:0016020), Cellular Component: outer membrane-bounded periplasmic space (GO:0030288), Molecular Function: ionotropic glutamate receptor activity (GO:0004970), Molecular Function: transporter activity (GO:0005215), Molecular Function: extracellular-glutamate-gated ion channel activity (GO:0005234)
Os03g0120900	1.00594	1.02551e-06			Similar to AP2 domain containing protein RAP2.8 (Fragment).	Biological Process: regulation of transcription, DNA-dependent (GO:0006355), Molecular Function: DNA binding (GO:0003677)
Os02g0153700	0.99205	0.000284927			Serine/threonine protein kinase domain containing protein.	Biological Process: protein phosphorylation (GO:0006468), Molecular Function: protein kinase activity (GO:0004672), Molecular Function: protein serine/threonine kinase activity (GO:0004674), Molecular Function: protein tyrosine kinase activity (GO:0004713), Molecular Function: protein binding (GO:0005515), Molecular Function: ATP binding (GO:0005524), Molecular Function: transferase activity, tra…
Os09g0545300	0.987573	4.57059e-05	OsSAUR39	SAUR PROTEIN 39	SAUR family protein, Negative regulator of auxin synthesis and transport
Os06g0693100	0.986164	0.00860032			NB-ARC domain containing protein.	Biological Process: defense response (GO:0006952), Molecular Function: ADP binding (GO:0043531)
Os03g0163200	0.980825	2.40692e-08			Protein of unknown function DUF247, plant family protein.
Os05g0586500	0.976268	3.69161e-05	OsGAT1	0	Amino acid transporter, transmembrane family protein.
Os07g0520100	0.970443	4.18014e-14			Similar to taxane 10-beta-hydroxylase.	Biological Process: oxidation-reduction process (GO:0055114), Molecular Function: iron ion binding (GO:0005506), Molecular Function: electron carrier activity (GO:0009055), Molecular Function: oxidoreductase activity, acting on paired donors, with incorporation or reduction of molecular oxygen (GO:0016705), Molecular Function: heme binding (GO:0020037)
Os03g0352450	0.967286	0.00483591	OsINO80		Hypothetical conserved gene.	Molecular Function: hydrolase activity, acting on acid anhydrides (GO:0016817)
Os02g0291000	0.962637	2.49735e-05	OsCBL7	CALCINEURIN B-LIKE PROTEIN 7	Calcineurin B (Fragment).	Molecular Function: calcium ion binding (GO:0005509)
Os05g0495600	0.960494	1.10637e-06	osACA7, OsACA6, OsACA7, OsPM5ATP4	CA2+-ATPASE 7	Similar to autoinhibited calcium ATPase.	Biological Process: ATP biosynthetic process (GO:0006754), Biological Process: cation transport (GO:0006812), Biological Process: metabolic process (GO:0008152), Biological Process: calcium ion transmembrane transport (GO:0070588), Cellular Component: membrane (GO:0016020), Molecular Function: nucleotide binding (GO:0000166), Molecular Function: catalytic activity (GO:0003824), Molecular Function…
Os06g0158500	0.957377	1.86506e-06	0	0	Conserved hypothetical protein.
Os11g0245200	0.956378	1.89703e-05			Similar to leucine-rich repeat family protein / protein kinase family protein.	Biological Process: protein phosphorylation (GO:0006468), Molecular Function: protein kinase activity (GO:0004672), Molecular Function: protein serine/threonine kinase activity (GO:0004674), Molecular Function: protein tyrosine kinase activity (GO:0004713), Molecular Function: protein binding (GO:0005515), Molecular Function: ATP binding (GO:0005524), Molecular Function: transferase activity, tra…
Os07g0108100	0.952435	0.00168088			Similar to OSIGBa0147O06.5 protein.
Os08g0203700	0.94301	0.000324469	0	0	Protein kinase, core domain containing protein.	Biological Process: protein phosphorylation (GO:0006468), Molecular Function: protein kinase activity (GO:0004672), Molecular Function: protein serine/threonine kinase activity (GO:0004674), Molecular Function: protein binding (GO:0005515), Molecular Function: ATP binding (GO:0005524), Molecular Function: transferase activity, transferring phosphorus-containing groups (GO:0016772)
Os02g0165200	0.938188	0.00277791			Hypothetical protein.
Os02g0786400	0.937923	0.000303405			Similar to DNA-binding transcription factor blind 1.	Biological Process: regulation of transcription, DNA-dependent (GO:0006355), Cellular Component: extracellular region (GO:0005576), Molecular Function: DNA binding (GO:0003677), Molecular Function: protein binding (GO:0005515)
Os09g0468000	0.931758	0.00181198			Multi antimicrobial extrusion protein MatE family protein.	Biological Process: drug transmembrane transport (GO:0006855), Biological Process: transmembrane transport (GO:0055085), Cellular Component: membrane (GO:0016020), Molecular Function: drug transmembrane transporter activity (GO:0015238), Molecular Function: antiporter activity (GO:0015297)
Os01g0816600	0.929981	0.00011547			Similar to predicted protein.	Biological Process: protein phosphorylation (GO:0006468), Molecular Function: protein kinase activity (GO:0004672), Molecular Function: protein serine/threonine kinase activity (GO:0004674), Molecular Function: protein tyrosine kinase activity (GO:0004713), Molecular Function: protein binding (GO:0005515), Molecular Function: ATP binding (GO:0005524), Molecular Function: transferase activity, tra…
Os10g0195000	0.926449	0.00388064	OsSTA240	0	Multi antimicrobial extrusion protein MatE family protein.	Biological Process: drug transmembrane transport (GO:0006855), Biological Process: transmembrane transport (GO:0055085), Cellular Component: membrane (GO:0016020), Molecular Function: drug transmembrane transporter activity (GO:0015238), Molecular Function: antiporter activity (GO:0015297)
Os10g0548850	0.921672	4.82159e-06	OsPUB58	0	U box domain domain containing protein.	Biological Process: protein ubiquitination (GO:0016567), Cellular Component: ubiquitin ligase complex (GO:0000151), Molecular Function: ubiquitin-protein ligase activity (GO:0004842)
Os11g0141100	0.919133	0.00736283			Hypothetical conserved gene.	Molecular Function: sulfotransferase activity (GO:0008146)
Os06g0700700	0.911805	0.000184913	OsHMA2, osHMA2, OsHMA2v	HEAVY METAL ATPASE 2	Similar to P1B-type heavy metal transporting ATPase.	Biological Process: metal ion transport (GO:0030001), Molecular Function: metal ion binding (GO:0046872)
Os12g0616400	0.909498	0.00602648	OsPCF8, PCF8	0	Similar to Isoform 2 of Transcription factor PCF8.
Os02g0830200	0.909005	8.94441e-06	OSRR3, OsRR3, rr3, Rra7, OsRRA7	A-TYPE RESPONSE REGULATOR 3	A-type response regulator, Cytokinin signaling	Biological Process: two-component signal transduction system (phosphorelay) (GO:0000160), Biological Process: regulation of transcription, DNA-dependent (GO:0006355), Molecular Function: two-component response regulator activity (GO:0000156)
Os06g0146250	0.908186	0.00312918	OsWRKY73	TRANSCRIPTION FACTOR WRKY73	Similar to WRKY transcription factor 73.	Biological Process: regulation of transcription, DNA-dependent (GO:0006355), Molecular Function: sequence-specific DNA binding transcription factor activity (GO:0003700), Molecular Function: sequence-specific DNA binding (GO:0043565)
Os08g0170100	0.907692	0.000411275			NB-ARC domain containing protein.	Molecular Function: ADP binding (GO:0043531)
Os11g0586001	0.902306	0.00252419			Putative protein phosphatase 2C 76.	Molecular Function: catalytic activity (GO:0003824)
Os12g0571100	0.900816	0.00228362	MT-1-4b, OsMT1d, MT1d, OsMT-I-4c, MT1c, OsMT1c	METALLOTHIONEIN I-4C	Metallothionein-like protein, ROS (reactive oxygen species) scavenger, Antioxidant	Molecular Function: metal ion binding (GO:0046872)
Os04g0116900	0.900032	0.00290574			Protein of unknown function DUF827, plant family protein.
Os12g0137700	0.897754	2.15779e-06			Sulfotransferase family protein.	Molecular Function: sulfotransferase activity (GO:0008146)
Os11g0609500	0.887841	0.000444299	OsRLCK339	RECEPTOR-LIKE CYTOPLASMIC KINASE 339	Similar to Jacalin-like lectin domain containing protein.	Biological Process: protein phosphorylation (GO:0006468), Molecular Function: protein kinase activity (GO:0004672), Molecular Function: ATP binding (GO:0005524), Molecular Function: transferase activity, transferring phosphorus-containing groups (GO:0016772)
Os08g0446350	0.885763	0.00424806			Non-protein coding transcript.
Os01g0187300	0.88431	0.00844333			Hypothetical conserved gene.
Os02g0673100	0.87969	2.6095e-05	OsALMT7	Aluminum-activated malate transporter 7	Similar to ALMT3.	Biological Process: response to aluminum ion (GO:0010044)
Os06g0181100	0.878946	0.000974362			Octicosapeptide/Phox/Bem1p domain containing protein.	Molecular Function: protein binding (GO:0005515)
Os09g0429200	0.877026	8.50956e-05	OsGLR2.2, GLR2.2, OsGLR2.1, GLR2.1	0	Similar to Glutamate receptor.	Biological Process: transport (GO:0006810), Cellular Component: membrane (GO:0016020), Cellular Component: outer membrane-bounded periplasmic space (GO:0030288), Molecular Function: ionotropic glutamate receptor activity (GO:0004970), Molecular Function: transporter activity (GO:0005215), Molecular Function: extracellular-glutamate-gated ion channel activity (GO:0005234)
Os04g0524600	0.873314	0.00515947	OsYSL12, OsYs11	PROBABLE METAL-NICOTIANAMINE TRANSPORTER YSL12	Oligopeptide transporter OPT superfamily protein.	Biological Process: transmembrane transport (GO:0055085)
Os01g0734399	0.867724	0.00142358			Hypothetical protein.	0
Os03g0641300	0.863216	0.00616501			Hypothetical conserved gene.	0
Os06g0129400	0.858615	1.76612e-10	OsSPX-MFS3	Vacuolar phosphate efflux transporter	Splicing variant of SPX-MFS protein 3	Biological Process: transmembrane transport (GO:0055085), Cellular Component: integral to membrane (GO:0016021)
Os09g0548400	0.858455	1.46835e-08			Dimethylaniline monooxygenase, N-oxide-forming domain containing protein.	Biological Process: oxidation-reduction process (GO:0055114), Cellular Component: intrinsic to endoplasmic reticulum membrane (GO:0031227), Molecular Function: flavin-containing monooxygenase activity (GO:0004499), Molecular Function: flavin adenine dinucleotide binding (GO:0050660), Molecular Function: NADP binding (GO:0050661)
Os02g0255700	0.857202	0.000262933	FLL1	0	Conserved hypothetical protein.	0
Os01g0263000	0.8555	0.000276855	prx5	0	Similar to Peroxidase.	Biological Process: response to oxidative stress (GO:0006979), Biological Process: oxidation-reduction process (GO:0055114), Molecular Function: peroxidase activity (GO:0004601), Molecular Function: heme binding (GO:0020037)
Os02g0581400	0.84996	0.0074902			Conserved hypothetical protein.	0
Os01g0781100	0.848118	0.00246174			Similar to NBS-LRR protein (Fragment).	Biological Process: defense response (GO:0006952), Molecular Function: ADP binding (GO:0043531)
Os01g0552000	0.839723	0.00840185			Hypothetical conserved gene.	0
Os01g0192300	0.835762	0.000318372	OsMYB1R1, 1R-MYB1	MYB-RELATED TRANSCRIPTION FACTOR 1	Similar to I-box binding factor (Fragment).	Biological Process: regulation of transcription, DNA-dependent (GO:0006355), Molecular Function: nucleic acid binding (GO:0003676), Molecular Function: DNA binding (GO:0003677), Molecular Function: protein binding (GO:0005515), Molecular Function: zinc ion binding (GO:0008270)
Os09g0322500	0.83536	0.000192797			Hypothetical conserved gene.	Molecular Function: protein binding (GO:0005515)
Os05g0486100	0.832394	1.15473e-07	OsRPK1	0	Leucine-rich repeat receptor-like kinase, Mn<sup>2+</sup>/Mg<sup>2+</sup>-dependent serine/threonine (Ser/Thr) kinase, Ca<sup>2+</sup>-independent Ser/Thr kinase, Negative regulation of polar auxin transport, Root development	Biological Process: protein phosphorylation (GO:0006468), Molecular Function: protein kinase activity (GO:0004672), Molecular Function: protein binding (GO:0005515), Molecular Function: ATP binding (GO:0005524)
Os01g0852100	0.832164	0.00318247	OsRLCK48	RECEPTOR-LIKE CYTOPLASMIC KINASE 48	Conserved hypothetical protein.	0
Os04g0503200	0.828637	0.00637161			Conserved hypothetical protein.	0
Os02g0286850	0.826728	0.00985838			Similar to Stripe rust resistance protein Yr10.	Biological Process: defense response (GO:0006952), Molecular Function: ADP binding (GO:0043531)
Os07g0539300	0.81302	5.44207e-08	Gns13	0	Glycoside hydrolase, family 17 protein.	Biological Process: carbohydrate metabolic process (GO:0005975), Molecular Function: catalytic activity (GO:0003824), Molecular Function: hydrolase activity, hydrolyzing O-glycosyl compounds (GO:0004553), Molecular Function: cation binding (GO:0043169)
Os12g0293100	0.809224	0.00564213	OsTERT	TELOMERASE REVERSE TRANSCRIPTASE	Similar to Telomerase reverse transcriptase.	0
Os03g0607700	0.809018	0.000438349			Zinc finger, C2H2-like domain containing protein.	Cellular Component: intracellular (GO:0005622), Molecular Function: nucleic acid binding (GO:0003676), Molecular Function: zinc ion binding (GO:0008270)
Os11g0689400	0.804053	0.00401931	OsRH40, DRH1	0	Similar to predicted protein.	Molecular Function: nucleic acid binding (GO:0003676), Molecular Function: ATP binding (GO:0005524), Molecular Function: ATP-dependent helicase activity (GO:0008026)
Os10g0462300	0.799092	0.00266537			Hypothetical conserved gene.	0
Os08g0206400	0.793763	8.86841e-08	OsHAK12	HIGH-AFFINITY POTASSIUM(K+) TRANSPORTER 12	Similar to Potassium transporter 18.	Biological Process: potassium ion transmembrane transport (GO:0071805), Cellular Component: membrane (GO:0016020), Molecular Function: potassium ion transmembrane transporter activity (GO:0015079)
Os01g0370000	0.786254	0.000578226	OsOPR9, OsOPR01-2	12-OXOPHYTODIENOATE REDUCTASE 9	NADH:flavin oxidoreductase/NADH oxidase, N-terminal domain containing protein.	Biological Process: metabolic process (GO:0008152), Biological Process: oxidation-reduction process (GO:0055114), Molecular Function: catalytic activity (GO:0003824), Molecular Function: FMN binding (GO:0010181), Molecular Function: oxidoreductase activity (GO:0016491)
Os07g0180300	0.784962	0.00553353			Protein of unknown function DUF594 family protein.	0
Os03g0599000	0.779924	0.0003594			NB-ARC domain containing protein.	Biological Process: defense response (GO:0006952), Molecular Function: protein binding (GO:0005515), Molecular Function: ADP binding (GO:0043531)
Os03g0117100	0.774212	0.00220106	OsPEX11-1	PEROXIN 11-1	Peroxisomal protein, Response to salt and low nitrogen stresses	Biological Process: peroxisome fission (GO:0016559), Cellular Component: integral component of peroxisomal membrane (GO:0005779)
Os11g0663100	0.773928	0.000454806		ortho CBP60G (Athaliana)	Hypothetical conserved gene.	0
Os01g0859500	0.765946	5.97284e-07	OsLG2, OsbZIP11, BZIP11	b-ZIP TRANSCRIPTION FACTOR 11	Similar to Basic leucine zipper protein (Liguleless2).	Biological Process: regulation of transcription, DNA-dependent (GO:0006355), Molecular Function: sequence-specific DNA binding transcription factor activity (GO:0003700), Molecular Function: sequence-specific DNA binding (GO:0043565), Molecular Function: protein dimerization activity (GO:0046983)
Os01g0290650	0.759547	0.00330582			Non-protein coding transcript.	0
Os11g0609600	0.75903	0.000889298	GF14h, OsGF14h, 14-3-3h	0	Similar to 14-3-3-like protein.	Molecular Function: protein domain specific binding (GO:0019904)
Os05g0464001	0.756244	0.00608313			Conserved hypothetical protein.	0
Os04g0675200	0.755907	0.00242511		chaperone	Similar to H0103C06.6 protein.	0
Os01g0777700	0.752466	0.00804242		Inositol hexakisphosphate	Similar to acid phosphatase/ oxidoreductase/ transition metal ion binding.	Molecular Function: acid phosphatase activity (GO:0003993)
Os04g0508500	0.74602	0.00489606	R2R3-MYB	0	Similar to OSIGBa0101P20.9 protein.	Biological Process: regulation of transcription, DNA-dependent (GO:0006355), Molecular Function: DNA binding (GO:0003677), Molecular Function: protein binding (GO:0005515)
Os11g0671100	0.739467	0.00835689			Hypothetical protein.	0
Os05g0589200	0.734848	0.00475733	OsSIG3	SIGMA FACTOR 3	RNA polymerase sigma factor, region 2 domain containing protein.	Biological Process: transcription initiation, DNA-dependent (GO:0006352), Biological Process: regulation of transcription, DNA-dependent (GO:0006355), Molecular Function: DNA binding (GO:0003677), Molecular Function: sequence-specific DNA binding transcription factor activity (GO:0003700), Molecular Function: sigma factor activity (GO:0016987)
Os04g0673000	0.732493	0.000788167			Similar to H0322F07.7 protein.	0
Os01g0367400	0.731858	0.00527545			Conserved hypothetical protein.	0
Os01g0818600	0.728663	7.07646e-06			Similar to Leucine-rich repeat transmembrane protein kinase.	Biological Process: protein phosphorylation (GO:0006468), Molecular Function: protein kinase activity (GO:0004672), Molecular Function: protein serine/threonine kinase activity (GO:0004674), Molecular Function: protein tyrosine kinase activity (GO:0004713), Molecular Function: ATP binding (GO:0005524), Molecular Function: transferase activity, transferring phosphorus-containing groups (GO:0016772)
Os08g0414700	0.726171	0.00872232	OsTPS7	TREHALOSE-6-PHOSPHATE SYNTHASE 7	Similar to Trehalose-6-phosphate synthase (Fragment).	Biological Process: trehalose biosynthetic process (GO:0005992), Biological Process: metabolic process (GO:0008152), Molecular Function: catalytic activity (GO:0003824)
Os07g0444000	0.721933	0.00617094		sphingolipid	Similar to Non-lysosomal glucosylceramidase.	0
Os08g0332600	0.718738	0.00161724			Disease resistance protein domain containing protein.	Biological Process: defense response (GO:0006952), Molecular Function: ADP binding (GO:0043531)
Os11g0110000	0.709767	0.00622732			Similar to predicted protein.	0
Os01g0958500	0.707997	9.63324e-05			Similar to RNA binding protein-like.	Molecular Function: nucleotide binding (GO:0000166), Molecular Function: nucleic acid binding (GO:0003676)
Os01g0975300	0.707906	3.16571e-05	OsMYB48, OsMYB48-1, OsMYB48-2	0	MYB-related transcription factor, Drought and salinity tolerance	Molecular Function: DNA binding (GO:0003677)
Os01g0814200	0.707879	0.0022205			Endonuclease/exonuclease/phosphatase domain containing protein.	0
Os04g0388700	0.705502	7.16213e-11		Nod-like vacuole mb	Similar to OSIGBa0096P03.3 protein.	0
Os01g0851000	0.701766	0.00342294			Carbohydrate/purine kinase domain containing protein.	0
Os03g0233800	0.701708	2.6095e-05			Protein of unknown function DUF547 domain containing protein.	0
Os04g0358000	0.699444	0.000625042		chloroplastic oxoene reductase	Similar to OSIGBa0104J13.1 protein.	Biological Process: oxidation-reduction process (GO:0055114), Molecular Function: zinc ion binding (GO:0008270), Molecular Function: oxidoreductase activity (GO:0016491), Molecular Function: transferase activity, transferring acyl groups other than amino-acyl groups (GO:0016747)
Os02g0582100	0.698062	0.00411139			Conserved hypothetical protein.	0
Os12g0140300	0.691369	0.00124579			FBD domain containing protein.	0
Os09g0554000	0.691235	0.00594153	OsSTA235, OsPT20	PHOSPHATE TRANSPORTER 20	Similar to Mitochondrial phosphate transporter.	0
Os11g0251400	0.685568	8.75184e-08			Hypothetical conserved gene.	Molecular Function: protein binding (GO:0005515)
Os04g0687900	0.684427	1.61144e-08	OsTLP3, OsTLP7, OsFbox240, Os_F0401	0	Similar to T24D18.17 protein (Tubby-like protein TULP8).	Molecular Function: protein binding (GO:0005515)
Os07g0603300	0.6835	2.76498e-09	GL7, GW7, qGW7, qGL7, SLG7, GL7/GW7/SLG7	0	TON1 RECRUIT MOTIF (TRM)-containing protein, Regulation of grain size and shape	0
Os08g0563200	0.67452	0.00538498			Protein of unknown function DUF296 domain containing protein.	0
Os07g0542400	0.674015	3.0199e-05			Similar to Receptor protein kinase.	Biological Process: protein phosphorylation (GO:0006468), Molecular Function: protein kinase activity (GO:0004672), Molecular Function: protein serine/threonine kinase activity (GO:0004674), Molecular Function: ATP binding (GO:0005524), Molecular Function: transferase activity, transferring phosphorus-containing groups (GO:0016772)
Os04g0349401	0.673393	0.00052448		ribonucleoprotein 48 kDa	Hypothetical conserved gene.	0
Os01g0165200	0.672323	0.000126134			Kelch-type beta propeller domain containing protein.	Molecular Function: protein binding (GO:0005515)
Os01g0775500	0.671017	0.000666292			Mannose-binding lectin domain containing protein.	0
Os03g0116700	0.670787	1.32289e-05	OsFbox127, Os_F0532	0	Cyclin-like F-box domain containing protein.	Molecular Function: protein binding (GO:0005515)
Os02g0196600	0.664324	8.4414e-08	OsHMA4	HEAVY METAL ATPASE 4	Heavy metal P1B-type ATPase, Cu-transporting ATPase, Control of Cu accumulation in rice grain	Biological Process: cation transport (GO:0006812), Biological Process: metal ion transport (GO:0030001), Molecular Function: nucleotide binding (GO:0000166), Molecular Function: copper ion binding (GO:0005507), Molecular Function: cation-transporting ATPase activity (GO:0019829), Molecular Function: metal ion binding (GO:0046872), Cellular Component: integral component of membrane (GO:0016021)
Os11g0533100	0.664265	0.000222616		helicase	Similar to CarD-like transcriptional regulator family protein, expressed.	0
Os11g0706100	0.662979	0.00436639			Protein of unknown function DUF37 domain containing protein.	0
Os01g0794800	0.65975	0.00902433			Similar to Subtilase.	Biological Process: proteolysis (GO:0006508), Biological Process: negative regulation of catalytic activity (GO:0043086), Molecular Function: serine-type endopeptidase activity (GO:0004252), Molecular Function: identical protein binding (GO:0042802)
Os02g0121500	0.653912	0.00486968			Conserved hypothetical protein.	0
Os05g0258400	0.651424	0.00138396			Protein kinase, catalytic domain domain containing protein.	Biological Process: protein phosphorylation (GO:0006468), Molecular Function: protein kinase activity (GO:0004672), Molecular Function: protein serine/threonine kinase activity (GO:0004674), Molecular Function: protein tyrosine kinase activity (GO:0004713), Molecular Function: ATP binding (GO:0005524), Molecular Function: transferase activity, transferring phosphorus-containing groups (GO:0016772)
Os12g0210400	0.650656	0.00594153			Protein kinase, core domain containing protein.	Biological Process: protein phosphorylation (GO:0006468), Molecular Function: protein kinase activity (GO:0004672), Molecular Function: protein serine/threonine kinase activity (GO:0004674), Molecular Function: protein binding (GO:0005515), Molecular Function: ATP binding (GO:0005524), Molecular Function: transferase activity, transferring phosphorus-containing groups (GO:0016772)
Os12g0611100	0.650105	0.00141962	OsRLCK373	RECEPTOR-LIKE CYTOPLASMIC KINASE 373	Similar to serine/threonine-protein kinase receptor.	Biological Process: protein phosphorylation (GO:0006468), Molecular Function: protein kinase activity (GO:0004672), Molecular Function: ATP binding (GO:0005524), Molecular Function: transferase activity, transferring phosphorus-containing groups (GO:0016772)
Os03g0108600	0.648142	0.000575579	OsBIRH1	0	Similar to DEAD-box ATP-dependent RNA helicase 50.	Molecular Function: nucleic acid binding (GO:0003676), Molecular Function: helicase activity (GO:0004386), Molecular Function: ATP binding (GO:0005524), Molecular Function: ATP-dependent helicase activity (GO:0008026)
Os08g0327100	0.646246	0.000340526			Galacturonosyltransferase, Pectin biosynthesis	Molecular Function: transferase activity, transferring glycosyl groups (GO:0016757)
Os03g0139200	0.645311	0.000198127			Cytochrome c region domain containing protein.	0
Os10g0561800	0.644769	0.00186552	Oshox1, OsHox1	HOMEOBOX-LEUCINE ZIPPER PROTEIN HOX1	Similar to homeodomain leucine zipper protein hox1.	Biological Process: transcription, DNA-dependent (GO:0006351), Biological Process: regulation of transcription, DNA-dependent (GO:0006355), Cellular Component: nucleus (GO:0005634), Molecular Function: DNA binding (GO:0003677), Molecular Function: sequence-specific DNA binding transcription factor activity (GO:0003700), Molecular Function: protein binding (GO:0005515), Molecular Function: sequenc…
Os09g0437500	0.642661	0.000255195			Dormancyauxin associated family protein.	0
Os01g0782200	0.63992	0.00273081			Diacylglycerol kinase, catalytic region domain containing protein.	Biological Process: activation of protein kinase C activity by G-protein coupled receptor protein signaling pathway (GO:0007205), Molecular Function: diacylglycerol kinase activity (GO:0004143)
Os12g0459300	0.635157	0.0059493			Nucleic acid-binding, OB-fold domain containing protein.	0
Os05g0126400	0.631855	0.00097683			Conserved hypothetical protein.	0
Os01g0899700	0.630273	0.00640968			Pollen Ole e 1 allergen and extensin domain containing protein.	0
Os09g0394600	0.629721	0.00145022			Endonuclease/exonuclease/phosphatase domain containing protein.	Molecular Function: inositol or phosphatidylinositol phosphatase activity (GO:0004437)
Os05g0370100	0.627779	0.0021653			Conserved hypothetical protein.	0
Os04g0509100	0.627778	0.00959993			Similar to triacylglycerol lipase.	Biological Process: lipid metabolic process (GO:0006629), Molecular Function: triglyceride lipase activity (GO:0004806), Molecular Function: protein binding (GO:0005515)
Os05g0135900	0.626985	0.00142358			Spectrin repeat containing protein.	0
Os01g0194300	0.624708	0.00230697	OsNH1, OsNPR1, OsNPR1/NH1, NPR1, OsPR2, PR2	NPR1 HOMOLOG 1	Ankyrin-repeat protein, Herbivore-induced defense response, Blast disease resistance	Molecular Function: protein binding (GO:0005515)
Os01g0639900	0.624053	7.63673e-05	OsCA, CA, OsbetaCA1, betaCA1	BETA-CARBONIC ANHYDRASE 1	beta-carbonic anhydrase (EC:4.2.1.1), Carbon assimilation, CO<sub>2</sub>-mediated stomatal pore response	Biological Process: carbon utilization (GO:0015976), Molecular Function: carbonate dehydratase activity (GO:0004089), Molecular Function: zinc ion binding (GO:0008270)
Os02g0588700	0.623628	0.00072399			Conserved hypothetical protein.	0
Os02g0316900	0.62054	0.00580839			B-block binding subunit of TFIIIC domain containing protein.	0
Os04g0304200	0.619518	0.00911374			Similar to Nonphototropic hypocotyl protein 1 (EC 2.7.1.37) (Phototropin).	Biological Process: two-component signal transduction system (phosphorelay) (GO:0000160), Biological Process: regulation of transcription, DNA-dependent (GO:0006355), Biological Process: protein phosphorylation (GO:0006468), Biological Process: signal transduction (GO:0007165), Molecular Function: two-component sensor activity (GO:0000155), Molecular Function: protein kinase activity (GO:0004672)…
Os02g0606900	0.618163	0.00227955	OsPP2C21, PP2C21, OsPP31	0	Similar to cDNA clone:J023104F18, full insert sequence.	Biological Process: protein dephosphorylation (GO:0006470), Cellular Component: protein serine/threonine phosphatase complex (GO:0008287), Molecular Function: catalytic activity (GO:0003824), Molecular Function: protein serine/threonine phosphatase activity (GO:0004722)
Os12g0136900	0.616616	0.00112851	osACA5, OsACA9, OsACA5, OsPM12ATP4	CA2+-ATPASE 5	Similar to Calcium-transporting ATPase 4, plasma membrane-type (EC 3.6.3.8) (Ca(2+)-ATPase isoform 4).	Biological Process: ATP biosynthetic process (GO:0006754), Biological Process: cation transport (GO:0006812), Biological Process: calcium ion transmembrane transport (GO:0070588), Cellular Component: membrane (GO:0016020), Molecular Function: nucleotide binding (GO:0000166), Molecular Function: calcium-transporting ATPase activity (GO:0005388), Molecular Function: calmodulin binding (GO:0005516),…
Os09g0369000	0.615864	0.000433068	OsERF#050, OsERF050, OsERF50, AP2/EREBP#113, AP2/EREBP113, OsDREB6	ETHYLENE RESPONSE FACTOR 50	Hypothetical gene.	0
Os02g0672200	0.615578	3.62908e-06	OsAGO1a, AGO1a, AGO10, AGO1-1	PROTEIN ARGONAUTE 1A	Similar to AGO1 homologous protein.	Molecular Function: nucleic acid binding (GO:0003676), Molecular Function: protein binding (GO:0005515)
Os01g0106700	0.61549	0.00435357			Hypothetical conserved gene.	Molecular Function: protein serine/threonine kinase activity (GO:0004674), Molecular Function: protein binding (GO:0005515), Molecular Function: transferase activity, transferring phosphorus-containing groups (GO:0016772), Molecular Function: phosphotransferase activity, alcohol group as acceptor (GO:0016773)
Os07g0618700	0.612556	7.34711e-05			Conserved hypothetical protein.	0
Os02g0639800	0.611583	0.000661759			Hypothetical gene.	0
Os03g0108800	0.611291	0.00396575			Similar to Cyclin-dependent kinase A-1.	Biological Process: protein phosphorylation (GO:0006468), Molecular Function: protein kinase activity (GO:0004672), Molecular Function: protein serine/threonine kinase activity (GO:0004674), Molecular Function: ATP binding (GO:0005524), Molecular Function: transferase activity, transferring phosphorus-containing groups (GO:0016772)
Os11g0671000	0.610038	0.00313388			Similar to Dormancy-associated protein.	0
Os07g0481300	0.607991	3.34789e-05			Hypothetical conserved gene.	Biological Process: defense response (GO:0006952), Molecular Function: ADP binding (GO:0043531)
Os05g0213900	0.6073	0.0016947			Virulence factor, pectin lyase fold family protein.	0
Os01g0779100	0.605896	0.00360997			Peptidase M16, zinc-binding site domain containing protein.	Biological Process: proteolysis (GO:0006508), Molecular Function: catalytic activity (GO:0003824), Molecular Function: metalloendopeptidase activity (GO:0004222), Molecular Function: zinc ion binding (GO:0008270), Molecular Function: metal ion binding (GO:0046872)
Os07g0175900	0.603582	0.00188796			Similar to Inositol-1, 4, 5-trisphosphate 5-Phosphatase-like protein.	Molecular Function: inositol or phosphatidylinositol phosphatase activity (GO:0004437)
Os10g0456800	0.596161	0.00473179			CHY zinc finger protein, Transcriptional co-activator of DST (Drought and Salt Tolerance: zinc finger transcription factor gene), Drought and salt tolerance, Stomatal aperture control	Molecular Function: protein binding (GO:0005515), Molecular Function: zinc ion binding (GO:0008270)
Os03g0342900	0.594548	8.95046e-06			Dormancyauxin associated family protein.	0
Os04g0616300	0.591748	0.00127003			Similar to H0525G02.10 protein.	Biological Process: protein phosphorylation (GO:0006468), Molecular Function: protein kinase activity (GO:0004672), Molecular Function: protein serine/threonine kinase activity (GO:0004674), Molecular Function: ATP binding (GO:0005524), Molecular Function: transferase activity, transferring phosphorus-containing groups (GO:0016772)
Os07g0621500	0.591556	0.001843			Similar to predicted protein.	Cellular Component: intracellular (GO:0005622), Molecular Function: nucleotide binding (GO:0000166), Molecular Function: nucleic acid binding (GO:0003676), Molecular Function: helicase activity (GO:0004386), Molecular Function: protein binding (GO:0005515), Molecular Function: ATP binding (GO:0005524), Molecular Function: zinc ion binding (GO:0008270)
Os09g0397300	0.589207	5.97284e-07	OsTPS10	TREHALOSE-6-PHOSPHATE SYNTHASE 10	HAD-superfamily hydrolase subfamily IIB protein.	Biological Process: trehalose biosynthetic process (GO:0005992), Biological Process: metabolic process (GO:0008152), Molecular Function: catalytic activity (GO:0003824)
Os07g0524000	0.587964	2.91138e-06			Conserved hypothetical protein.	0
Os06g0102750	0.583267	0.000985881			Hypothetical conserved gene.	0
Os02g0141300	0.578029	0.00764962	0	ARABINOSE-LIKE PROTEIN	Arabinokinase-Like Protein, Pollen development	Biological Process: metabolic process (GO:0008152), Molecular Function: ATP binding (GO:0005524), Molecular Function: kinase activity (GO:0016301), Molecular Function: phosphotransferase activity, alcohol group as acceptor (GO:0016773), Cellular Component: cytoplasm (GO:0005737)
Os06g0275600	0.577631	2.6671e-05	OsbHLH086, TA1	0	Similar to TA1 protein (Fragment).	0
Os04g0535000	0.574904	0.00179936			Hypothetical protein.	0
Os01g0535900	0.573621	0.00860614			Similar to methyltransferase.	Biological Process: tRNA modification (GO:0006400), Molecular Function: tRNA (guanine-N7-)-methyltransferase activity (GO:0008176)
Os02g0663300	0.572584	0.00899716	OsWD40-48, OsSTA70	0	BEACH domain domain containing protein.	Molecular Function: protein binding (GO:0005515)
Os11g0303200	0.571756	0.00312918			Hypothetical protein.	0
Os12g0586100	0.570999	0.00116356	OsSAPK9	STRESS/ABA-ACTIVATED PROTEIN KINASE 9	Serine/threonine protein kinase, Abscisic acid (ABA)-activated protein kinase, Hyperosmotic stress response, ABA signal transduction	Biological Process: protein phosphorylation (GO:0006468), Molecular Function: protein kinase activity (GO:0004672), Molecular Function: ATP binding (GO:0005524)
Os04g0605300	0.570355	0.00989189	OsIRL1	0	Leucine-rich repeat, typical subtype containing protein.	Molecular Function: protein binding (GO:0005515)
Os05g0535400	0.568721	0.000171749			Choline/ethanolamine kinase family protein.	Molecular Function: transferase activity, transferring phosphorus-containing groups (GO:0016772), Molecular Function: phosphotransferase activity, alcohol group as acceptor (GO:0016773)
Os02g0777100	0.566642	0.00513165			DENN domain containing protein.	0
Os04g0644750	0.565626	0.000812708			Hypothetical protein.	0
Os02g0241600	0.564834	3.94827e-05			Protein kinase, core domain containing protein.	Biological Process: protein phosphorylation (GO:0006468), Molecular Function: protein kinase activity (GO:0004672), Molecular Function: protein serine/threonine kinase activity (GO:0004674), Molecular Function: ATP binding (GO:0005524), Molecular Function: transferase activity, transferring phosphorus-containing groups (GO:0016772)
Os02g0794900	0.562454	0.00202495			Formin-like protein 7.	Biological Process: cellular component organization (GO:0016043), Biological Process: actin cytoskeleton organization (GO:0030036), Molecular Function: actin binding (GO:0003779), Molecular Function: protein binding (GO:0005515)
Os01g0933200	0.562102	0.00349003			Heavy metal transport/detoxification protein domain containing protein.	Biological Process: metal ion transport (GO:0030001), Molecular Function: metal ion binding (GO:0046872)
Os02g0498100	0.560271	0.00764202			Hypothetical protein.	0
Os05g0398000	0.557408	0.000123983	CycU3;1, CycU3;os;1, Orysa;CycU3;1, OsCYCP1;1	CYCLIN-U3-1	Similar to Cyclin-P3-1.	Biological Process: regulation of cyclin-dependent protein kinase activity (GO:0000079), Molecular Function: protein kinase binding (GO:0019901)
Os02g0164900	0.556317	0.00341717	OsARF6a, OsARF6, ARF6	AUXIN RESPONSE FACTOR 6A	Similar to Auxin response factor 3.	Biological Process: regulation of transcription, DNA-dependent (GO:0006355), Biological Process: response to hormone stimulus (GO:0009725), Cellular Component: nucleus (GO:0005634), Molecular Function: DNA binding (GO:0003677), Molecular Function: protein dimerization activity (GO:0046983)
Os04g0512900	0.555027	0.00218006			NB-ARC domain containing protein.	Biological Process: defense response (GO:0006952), Molecular Function: ADP binding (GO:0043531)
Os01g0555600	0.552728	0.000496361			Dynein light chain, type 1 family protein.	Biological Process: microtubule-based process (GO:0007017), Cellular Component: microtubule associated complex (GO:0005875)
Os09g0300800	0.552593	0.00144353			Protein of unknown function DUF247, plant family protein.	0
Os08g0177300	0.550863	0.00246803			HSA domain containing protein.	Biological Process: regulation of transcription, DNA-dependent (GO:0006355), Molecular Function: DNA binding (GO:0003677), Molecular Function: protein binding (GO:0005515)
Os03g0306700	0.548917	0.0068389	OsbZIP27	b-ZIP TRANSCRIPTION FACTOR 27	Conserved hypothetical protein.	0
Os06g0663900	0.547727	0.00481774	OsRLCK212	RECEPTOR-LIKE CYTOPLASMIC KINASE 212	Similar to (RAP Annotation release2) Protein kinase-like domain containing protein.	Biological Process: protein phosphorylation (GO:0006468), Molecular Function: protein kinase activity (GO:0004672), Molecular Function: ATP binding (GO:0005524), Molecular Function: transferase activity, transferring phosphorus-containing groups (GO:0016772)
Os01g0687300	0.546321	0.00151281			Conserved hypothetical protein.	0
Os08g0166400	0.543199	0.000901362			Zinc finger, PMZ-type domain containing protein.	Molecular Function: zinc ion binding (GO:0008270)
Os04g0616500	0.543193	0.00042628			Similar to H0525G02.11 protein.	Biological Process: protein phosphorylation (GO:0006468), Molecular Function: protein kinase activity (GO:0004672), Molecular Function: protein serine/threonine kinase activity (GO:0004674), Molecular Function: protein tyrosine kinase activity (GO:0004713), Molecular Function: ATP binding (GO:0005524), Molecular Function: transferase activity, transferring phosphorus-containing groups (GO:0016772)
Os05g0517200	0.54287	0.00209697	OsTPS6	TREHALOSE-6-PHOSPHATE SYNTHASE 6	HAD-superfamily hydrolase subfamily IIB protein.	Biological Process: trehalose biosynthetic process (GO:0005992), Biological Process: metabolic process (GO:0008152), Molecular Function: catalytic activity (GO:0003824)
Os11g0648100	0.542802	0.00277791			Kinesin, motor domain domain containing protein.	Biological Process: microtubule-based movement (GO:0007018), Molecular Function: microtubule motor activity (GO:0003777), Molecular Function: ATP binding (GO:0005524)
Os08g0103000	0.539965	0.00160947			Similar to serine/threonine-protein kinase CTR1.	Biological Process: metabolic process (GO:0008152), Molecular Function: amino acid binding (GO:0016597), Molecular Function: transferase activity, transferring phosphorus-containing groups (GO:0016772)
Os03g0827700	0.535191	0.00376604	OsRH3	0	Similar to ATP-dependent RNA helicase.	Cellular Component: nucleus (GO:0005634), Molecular Function: nucleic acid binding (GO:0003676), Molecular Function: RNA binding (GO:0003723), Molecular Function: helicase activity (GO:0004386), Molecular Function: ATP binding (GO:0005524), Molecular Function: ATP-dependent helicase activity (GO:0008026), Molecular Function: zinc ion binding (GO:0008270)
Os08g0538700	0.534882	0.00246018	Orysa;Rb2, RBR2, OsRBR1	_	Retinoblastoma-related protein.	Biological Process: regulation of cell cycle (GO:0051726), Cellular Component: nucleus (GO:0005634)
Os11g0588600	0.533405	0.00594153	Xa39	0	NB-ARC domain containing protein.	Molecular Function: ADP binding (GO:0043531)
Os04g0583900	0.532483	0.00244916	LHY, LHY-like_chr.4, OsMYBR1, MYBR1, OsMYB1R35, MYB1R35	0	Similar to LHY protein.	Biological Process: regulation of transcription, DNA-dependent (GO:0006355), Molecular Function: DNA binding (GO:0003677), Molecular Function: protein binding (GO:0005515)
Os06g0677400	0.529673	8.05737e-05			3-hydroxyisobutyrate dehydrogenase domain containing protein.	Biological Process: pentose-phosphate shunt (GO:0006098), Biological Process: valine metabolic process (GO:0006573), Biological Process: oxidation-reduction process (GO:0055114), Molecular Function: nucleotide binding (GO:0000166), Molecular Function: phosphogluconate dehydrogenase (decarboxylating) activity (GO:0004616), Molecular Function: 3-hydroxyisobutyrate dehydrogenase activity (GO:0008442…
Os04g0196600	0.52908	0.0068389	0	0	Glycosyltransferase AER61, uncharacterized domain containing protein.	Molecular Function: transferase activity, transferring glycosyl groups (GO:0016757)
Os10g0103800	0.525438	0.005743	OsITPK1, OsITP5/6K-1, ITP5/6K-1, OsITL2	INOSITOL 1,3,4-TRISPHOSPHATE 5/6-KINASE 1	Inositol 1, 3, 4-trisphosphate 56-kinase family protein.	Biological Process: inositol trisphosphate metabolic process (GO:0032957), Cellular Component: intracellular (GO:0005622), Molecular Function: magnesium ion binding (GO:0000287), Molecular Function: ATP binding (GO:0005524), Molecular Function: inositol tetrakisphosphate 1-kinase activity (GO:0047325), Molecular Function: inositol-1, 3,4-trisphosphate 6-kinase activity (GO:0052725), Molecular Fun…
Os05g0425700	0.523832	0.00276259	OsFbox258, Os_F0658	0	Similar to F-box protein AtFBL5.	0
Os03g0733200	0.522767	0.00555991			Non-protein coding transcript.	0
Os06g0729500	0.521777	0.0022205			Protein of unknown function DUF789 domain containing protein.	0
Os03g0165400	0.519812	0.00120543	OsBgal1, beta-gal, OsBGal1	BETA-GALACTOSIDASE 1	Similar to Relative to SR12 protein (Fragment).	Biological Process: carbohydrate metabolic process (GO:0005975), Molecular Function: catalytic activity (GO:0003824), Molecular Function: hydrolase activity, hydrolyzing O-glycosyl compounds (GO:0004553), Molecular Function: sugar binding (GO:0005529), Molecular Function: cation binding (GO:0043169)
Os01g0351800	0.518105	0.00592208			2OG-Fe(II) oxygenase domain containing protein.	Biological Process: oxidation-reduction process (GO:0055114), Molecular Function: oxidoreductase activity (GO:0016491), Molecular Function: oxidoreductase activity, acting on paired donors, with incorporation or reduction of molecular oxygen, 2-oxoglutarate as one donor, and incorporation of one atom each of oxygen into both donors (GO:0016706)
Os09g0551600	0.516259	0.00174736	0	0	Similar to HMGd1 protein (Nucleasome/chromatin assembly factor D protein NFD101).	Molecular Function: DNA binding (GO:0003677), Molecular Function: protein binding (GO:0005515)
Os08g0398000	0.507331	0.00981779	OsABCA3	ABC TRANSPORTER A FAMILY MEMBER 3	ABC transporter-like domain containing protein.	Molecular Function: nucleotide binding (GO:0000166), Molecular Function: ATP binding (GO:0005524), Molecular Function: ATPase activity (GO:0016887), Molecular Function: nucleoside-triphosphatase activity (GO:0017111)
Os10g0462800	0.507255	0.00374026	OspTAC3, pTAC3, OsPAP1, PAP1	0	Component of the plastid-encoded plastid RNA polymerase (PEP), peripheral subunit of PEP complex, OsPAP1/OspTAC3, Early chloroplast development	0
Os11g0152700	0.50695	1.70097e-05	OsbZIP79	b-ZIP TRANSCRIPTION FACTOR 79	Similar to Transcription factor HBP-1b(C38) (Fragment).	Biological Process: regulation of transcription, DNA-dependent (GO:0006355), Molecular Function: sequence-specific DNA binding transcription factor activity (GO:0003700), Molecular Function: sequence-specific DNA binding (GO:0043565), Molecular Function: protein dimerization activity (GO:0046983)
Os03g0734900	0.50503	0.000755276	OsTIFY1b, TIFY1B, OsCCT15, OsGATA19	GATA TRANSCRIPTION FACTOR 19	Similar to CCT motif family protein, expressed.	Biological Process: regulation of transcription, DNA-dependent (GO:0006355), Molecular Function: sequence-specific DNA binding transcription factor activity (GO:0003700), Molecular Function: protein binding (GO:0005515), Molecular Function: zinc ion binding (GO:0008270), Molecular Function: sequence-specific DNA binding (GO:0043565)
Os10g0362300	0.503226	0.00197167	OHK3, HK, OsHK5, Crl3, Ohk3, OsHK2	HISTIDINE KINASE 5	Similar to Histidine kinase 3.	Biological Process: signal transduction (GO:0007165), Cellular Component: membrane (GO:0016020), Molecular Function: two-component sensor activity (GO:0000155), Molecular Function: signal transducer activity (GO:0004871)
Os01g0536000	0.502663	0.000254594	OsCIPK08, CIPK8, OsCIPK8	CALCINEURIN B-LIKE PROTEIN-INTERACTING PROTEIN KINASE 8	Similar to CBL-interacting serine/threonine-protein kinase 24 (EC 2.7.1.37) (SNF1-related kinase 3.11) (SALT OVERLY SENSITIVE 2 protein).	Biological Process: protein phosphorylation (GO:0006468), Biological Process: signal transduction (GO:0007165), Molecular Function: protein kinase activity (GO:0004672), Molecular Function: protein serine/threonine kinase activity (GO:0004674), Molecular Function: ATP binding (GO:0005524), Molecular Function: transferase activity, transferring phosphorus-containing groups (GO:0016772)
Os01g0120300	0.500832	0.00059645			Similar to EMB2369 (EMBRYO DEFECTIVE 2369); ATP binding / aminoacyl-tRNA ligase/ leucine-tRNA ligase/ nucleotide binding.	Biological Process: tRNA aminoacylation for protein translation (GO:0006418), Biological Process: leucyl-tRNA aminoacylation (GO:0006429), Cellular Component: cytoplasm (GO:0005737), Molecular Function: nucleotide binding (GO:0000166), Molecular Function: aminoacyl-tRNA ligase activity (GO:0004812), Molecular Function: leucine-tRNA ligase activity (GO:0004823), Molecular Function: ATP binding (GO…
Os02g0258900	0.496469	0.00306334			Similar to Molybdopterin biosynthesis CNX2 protein (Molybdenum cofactor biosynthesis enzyme CNX2).	Biological Process: Mo-molybdopterin cofactor biosynthetic process (GO:0006777), Biological Process: metabolic process (GO:0008152), Cellular Component: molybdopterin synthase complex (GO:0019008), Molecular Function: catalytic activity (GO:0003824), Molecular Function: metal ion binding (GO:0046872), Molecular Function: iron-sulfur cluster binding (GO:0051536), Molecular Function: 4 iron, 4 sulf…
Os10g0437100	0.496342	0.00261508	OsCAT7	0	Amino acid/polyamine transporter I family protein.	Biological Process: amino acid transmembrane transport (GO:0003333), Biological Process: transport (GO:0006810), Biological Process: transmembrane transport (GO:0055085), Cellular Component: membrane (GO:0016020), Molecular Function: amino acid transmembrane transporter activity (GO:0015171)
Os06g0684000	0.49535	0.00164989			Similar to FAD-dependent pyridine nucleotide-disulphide oxidoreductase; Calcium-binding EF-hand.	Biological Process: oxidation-reduction process (GO:0055114), Molecular Function: oxidoreductase activity (GO:0016491)
Os04g0597800	0.495343	0.0060439	OsPTR6, OsNRT1;2, NRT1;2, OsNPF7.3, NPF7.3	PROTEIN TRANSPORTER 6	TGF-beta receptor, type I/II extracellular region family protein.	Biological Process: oligopeptide transport (GO:0006857), Cellular Component: membrane (GO:0016020), Molecular Function: transporter activity (GO:0005215)
Os10g0548200	0.494934	0.00142733			Tetratricopeptide-like helical domain containing protein.	Molecular Function: binding (GO:0005488), Molecular Function: protein binding (GO:0005515)
Os01g0872700	0.49482	0.0039173			Zinc finger, CCHC-type domain containing protein.	Biological Process: nucleobase-containing compound metabolic process (GO:0006139), Cellular Component: intracellular (GO:0005622), Cellular Component: nucleus (GO:0005634), Molecular Function: nucleic acid binding (GO:0003676), Molecular Function: exonuclease activity (GO:0004527), Molecular Function: 5'-3' exoribonuclease activity (GO:0004534), Molecular Function: zinc ion binding (GO:0008270)
Os01g0812200	0.493752	0.00172945	OsFbox046, OsFbox46, Os_F0609	0	Cyclin-like F-box domain containing protein.	0
Os03g0824100	0.493481	0.00330582			Pentatricopeptide repeat protein, Regulation of chloroplast development	Molecular Function: protein binding (GO:0005515)
Os07g0668900	0.492562	0.000140801	OsRLCK240	RECEPTOR-LIKE CYTOPLASMIC KINASE 240	Similar to Serine/threonine-protein kinase PBS1 (EC 2.7.1.37) (AvrPphB susceptible protein 1).	Biological Process: protein phosphorylation (GO:0006468), Molecular Function: protein kinase activity (GO:0004672), Molecular Function: protein serine/threonine kinase activity (GO:0004674), Molecular Function: protein tyrosine kinase activity (GO:0004713), Molecular Function: ATP binding (GO:0005524), Molecular Function: transferase activity, transferring phosphorus-containing groups (GO:0016772)
Os06g0683300	0.492229	0.00361236	Os6bglu25, Os6Bglu25	BETA-GLUCOSIDASE 25	Similar to Beta-glucosidase.	Biological Process: carbohydrate metabolic process (GO:0005975), Molecular Function: catalytic activity (GO:0003824), Molecular Function: hydrolase activity, hydrolyzing O-glycosyl compounds (GO:0004553), Molecular Function: cation binding (GO:0043169)
Os03g0255100	0.491744	0.00035109	OsBgal8, OsBGal8	BETA-GALACTOSIDASE 8	Similar to Relative to SR12 protein (Fragment).	Biological Process: carbohydrate metabolic process (GO:0005975), Molecular Function: catalytic activity (GO:0003824), Molecular Function: hydrolase activity, hydrolyzing O-glycosyl compounds (GO:0004553), Molecular Function: sugar binding (GO:0005529), Molecular Function: cation binding (GO:0043169)
Os04g0398800	0.490256	0.00384965			Similar to H0209H04.5 protein.	0
Os08g0100500	0.489786	0.00800051			Regulation of nuclear pre-mRNA protein domain containing protein.	0
Os05g0170800	0.489507	3.44423e-06			ApaG domain containing protein.	Biological Process: nucleotide-excision repair (GO:0006289), Molecular Function: DNA binding (GO:0003677), Molecular Function: nuclease activity (GO:0004518)
Os04g0577300	0.487269	0.00224387	OsGELP58, OsGELP58a, OsGELP58b, OsGELP58c, OsGELP58d	GDSL ESTERASE/LIPASE PROTEIN 58	Similar to GDSL-motif lipase/hydrolase-like protein.	Biological Process: lipid metabolic process (GO:0006629), Molecular Function: hydrolase activity, acting on ester bonds (GO:0016788)
Os04g0566500	0.486046	0.00246174	OsAGO1b, AGO1b, AGO1-2	PROTEIN ARGONAUTE 1B	Similar to Isoform 2 of Protein argonaute 1B.	Molecular Function: protein binding (GO:0005515)
Os03g0239300	0.48549	0.0026767	0	0	Zinc finger, C2H2-type domain containing protein.	Cellular Component: intracellular (GO:0005622), Molecular Function: zinc ion binding (GO:0008270)
Os05g0489000	0.484765	3.05461e-07			Endonuclease/exonuclease/phosphatase domain containing protein.	Molecular Function: inositol or phosphatidylinositol phosphatase activity (GO:0004437)
Os05g0551100	0.483414	0.00679222			Conserved hypothetical protein.	0
Os01g0748600	0.477105	1.94126e-05			Similar to Protein kinase family protein.	Molecular Function: protein binding (GO:0005515)
Os07g0667000	0.475882	7.38613e-05	OsTLP7, OsTLP11, OsFbox398, Os_F0421	0	Similar to Tubby-like protein 3.	Molecular Function: protein binding (GO:0005515)
Os08g0408500	0.475517	0.000131083	OsERF#048, OsERF048, OsERF48, AP2/EREBP#170, AP2/EREBP170	ETHYLENE RESPONSE FACTOR 48	Pathogenesis-related transcriptional factor and ERF domain containing protein.	Biological Process: regulation of transcription, DNA-dependent (GO:0006355), Molecular Function: DNA binding (GO:0003677), Molecular Function: sequence-specific DNA binding transcription factor activity (GO:0003700)
Os02g0190500	0.473194	0.00224525			Serine/threonine protein kinase-related domain containing protein.	Biological Process: protein phosphorylation (GO:0006468), Molecular Function: protein kinase activity (GO:0004672), Molecular Function: protein binding (GO:0005515), Molecular Function: ATP binding (GO:0005524), Molecular Function: transferase activity, transferring phosphorus-containing groups (GO:0016772)
Os04g0691100	0.472702	0.000176817	OsSAPK5	STRESS/ABA-ACTIVATED PROTEIN KINASE 5	Serine/threonine protein kinase, Hyperosmotic stress response	Biological Process: protein phosphorylation (GO:0006468), Molecular Function: protein kinase activity (GO:0004672), Molecular Function: ATP binding (GO:0005524)
Os04g0677700	0.467884	0.00903337	OsKTN80b	0	Katanin P80 ortholog, Katanin regulatory subunit P80b	Biological Process: microtubule severing (GO:0051013), Molecular Function: protein binding (GO:0005515), Molecular Function: microtubule binding (GO:0008017), Cellular Component: katanin complex (GO:0008352)
Os05g0188500	0.467041	0.00594153			Similar to SCC3.	Molecular Function: binding (GO:0005488)
Os07g0602900	0.465282	0.00261508			Protein of unknown function DUF1675 domain containing protein.	0
Os01g0923700	0.46447	0.00142575			Similar to Histidine kinase.	0
Os07g0658400	0.462666	0.00658948	SPL32, OsGLU, OsFd-GOGAT, Fd-GOGAT, ABC1/ OsFd-GOGAT	FERREDOXIN-DEPENDENT GLUTAMATE SYNTHASE	Ferredoxin-dependent glutamate synthase, Leaf senescence and nitrogen remobilization	Biological Process: glutamate biosynthetic process (GO:0006537), Biological Process: nitrogen compound metabolic process (GO:0006807), Biological Process: metabolic process (GO:0008152), Biological Process: oxidation-reduction process (GO:0055114), Molecular Function: catalytic activity (GO:0003824), Molecular Function: glutamate synthase activity (GO:0015930), Molecular Function: oxidoreductase …
Os09g0130800	0.460253	0.00641055			Similar to predicted protein.	0
Os02g0778200	0.457984	0.00299687			Isoleucyl-tRNA synthetase domain containing protein.	Biological Process: tRNA aminoacylation for protein translation (GO:0006418), Biological Process: isoleucyl-tRNA aminoacylation (GO:0006428), Cellular Component: cytoplasm (GO:0005737), Molecular Function: nucleotide binding (GO:0000166), Molecular Function: catalytic activity (GO:0003824), Molecular Function: aminoacyl-tRNA ligase activity (GO:0004812), Molecular Function: isoleucine-tRNA ligase…
Os03g0184100	0.457576	0.0019191			Conserved hypothetical protein.	0
Os07g0630900	0.453609	4.2022e-06	OsCslA7, OsCSLA7	CELLULOSE SYNTHASE LIKE A7	Similar to cDNA clone:J013000F18, full insert sequence.	0
Os08g0118000	0.450518	0.00110007	OsAHL1, AHL1	0	Protein of unknown function DUF296 domain containing protein.	Molecular Function: DNA binding (GO:0003677)
Os04g0553800	0.449608	5.53268e-05			Similar to OSIGBa0143N19.10 protein.	Molecular Function: transferase activity, transferring glycosyl groups (GO:0016757)
Os01g0881900	0.446891	0.00979083	0	0	Leucine-rich repeat, cysteine-containing containing protein.	Molecular Function: protein binding (GO:0005515)
Os02g0517300	0.445291	0.00856694			Topoisomerase II-associated protein PAT1 domain containing protein.	0
Os07g0679000	0.44415	0.00619426	OsHAK9	HIGH-AFFINITY POTASSIUM(K+) TRANSPORTER 9	Similar to Potassium transporter 2 (AtPOT2) (AtKUP2) (AtKT2).	Biological Process: potassium ion transmembrane transport (GO:0071805), Cellular Component: membrane (GO:0016020), Molecular Function: potassium ion transmembrane transporter activity (GO:0015079)
Os06g0708700	0.437998	0.00466405			Similar to Nodulin-like protein.	Cellular Component: membrane (GO:0016020)
Os10g0396400	0.437654	0.00528779			Leucine-rich repeat, cysteine-containing containing protein.	0
Os03g0157800	0.436722	0.000221422			Hypothetical conserved gene.	Biological Process: nucleobase-containing compound metabolic process (GO:0006139), Cellular Component: intracellular (GO:0005622), Molecular Function: nucleic acid binding (GO:0003676), Molecular Function: 3'-5' exonuclease activity (GO:0008408)
Os11g0194900	0.436686	0.00582972	OsRLCK315	RECEPTOR-LIKE CYTOPLASMIC KINASE 315	Protein kinase, core domain containing protein.	Biological Process: protein phosphorylation (GO:0006468), Molecular Function: protein kinase activity (GO:0004672), Molecular Function: protein serine/threonine kinase activity (GO:0004674), Molecular Function: ATP binding (GO:0005524), Molecular Function: transferase activity, transferring phosphorus-containing groups (GO:0016772)
Os03g0183100	0.434682	0.00134749	BP-73, OsBP-73, Riaa1, Os-BP-73	BINDING PROTEIN 73	SAP-like protein BP-73 (OsBP-73) (Riaa1).	Biological Process: transcription termination, DNA-dependent (GO:0006353)
Os11g0216000	0.433407	0.00410565	0	0	Pyruvate kinase family protein.	Biological Process: glycolysis (GO:0006096), Molecular Function: magnesium ion binding (GO:0000287), Molecular Function: catalytic activity (GO:0003824), Molecular Function: pyruvate kinase activity (GO:0004743), Molecular Function: potassium ion binding (GO:0030955)
Os08g0187700	0.432254	0.00158365			ENTH/VHS domain containing protein.	Cellular Component: intracellular (GO:0005622), Molecular Function: zinc ion binding (GO:0008270)
Os02g0562300	0.430193	0.00637161			Calmodulin binding protein-like family protein.	0
Os05g0295700	0.429422	0.00340324			Mitochondrial matrix Mmp37 domain containing protein.	0
Os06g0702600	0.428311	0.00387963	OsARF7a, OsARF19	AUXIN RESPONSE FACTOR 7A	Auxin response factor 19, Control of leaf angle	Biological Process: regulation of transcription, DNA-templated (GO:0006355), Biological Process: response to hormone (GO:0009725), Molecular Function: DNA binding (GO:0003677), Molecular Function: protein binding (GO:0005515), Cellular Component: nucleus (GO:0005634)
Os05g0573300	0.427415	6.60448e-06			Similar to CTP synthase 1 (EC 6.3.4.2) (UTP--ammonia ligase 1) (CTP synthetase 1).	Biological Process: pyrimidine nucleotide biosynthetic process (GO:0006221), Molecular Function: CTP synthase activity (GO:0003883)
Os02g0150700	0.425743	0.00466405	OsRFP	0	Zinc finger, RING-type domain containing protein.	Molecular Function: protein binding (GO:0005515), Molecular Function: zinc ion binding (GO:0008270)
Os11g0557700	0.424488	0.00659237			Similar to S-adenosylmethionine-dependent methyltransferase/ catalytic.	Biological Process: metabolic process (GO:0008152), Molecular Function: methyltransferase activity (GO:0008168)
Os11g0523800	0.421144	0.00601344	OsARF1, arf1, OsARF23, ARF23	AUXIN RESPONSE FACTOR 1	Similar to Isoform 3 of Auxin response factor 23.	Biological Process: regulation of transcription, DNA-dependent (GO:0006355), Biological Process: response to hormone stimulus (GO:0009725), Cellular Component: nucleus (GO:0005634), Molecular Function: DNA binding (GO:0003677)
Os06g0617800	0.417619	0.00687187			Ribose-phosphate pyrophosphokinase 2 (EC 2.7.6.1) (Phosphoribosyl pyrophosphate synthetase 2). Splice isoform 1.	Biological Process: nucleoside metabolic process (GO:0009116), Biological Process: ribonucleoside monophosphate biosynthetic process (GO:0009156), Biological Process: nucleotide biosynthetic process (GO:0009165), Biological Process: cellular biosynthetic process (GO:0044249), Molecular Function: magnesium ion binding (GO:0000287), Molecular Function: ribose phosphate diphosphokinase activity (GO:…
Os07g0602700	0.415274	0.0043521	0	0	Protein kinase, core domain containing protein.	Biological Process: protein phosphorylation (GO:0006468), Molecular Function: protein kinase activity (GO:0004672), Molecular Function: protein serine/threonine kinase activity (GO:0004674), Molecular Function: protein binding (GO:0005515), Molecular Function: ATP binding (GO:0005524), Molecular Function: transferase activity, transferring phosphorus-containing groups (GO:0016772)
Os01g0894600	0.414558	0.00632953	OsRFPV-7	0	Zinc finger, RING/FYVE/PHD-type domain containing protein.	Molecular Function: zinc ion binding (GO:0008270)
Os02g0724000	0.414366	0.00775138	OsN, OsBBX7, OsCCT08, DTH2	0	CONSTANS-like protein, Heading promotion under long-day condition	Molecular Function: protein binding (GO:0005515), Molecular Function: zinc ion binding (GO:0008270), Cellular Component: intracellular (GO:0005622)
Os02g0255500	0.41415	1.46206e-06	OsPYL/RCAR3, PYL3, OsPYL3, OsPYL10, OsRCAR1, RCAR1	0	Similar to Extensin (Fragment).	0
Os03g0127700	0.411963	0.00103683			Serine/threonine protein kinase-related domain containing protein.	Biological Process: protein phosphorylation (GO:0006468), Molecular Function: protein kinase activity (GO:0004672), Molecular Function: protein binding (GO:0005515), Molecular Function: ATP binding (GO:0005524), Molecular Function: transferase activity, transferring phosphorus-containing groups (GO:0016772)
Os05g0155200	0.411283	0.000119246	OS-ERS2, OsERS2, OsERS2a, OsERS2b, OsERS2c	0	Similar to Ethylene receptor.	Biological Process: signal transduction (GO:0007165), Biological Process: peptidyl-histidine phosphorylation (GO:0018106), Cellular Component: membrane (GO:0016020), Molecular Function: two-component sensor activity (GO:0000155), Molecular Function: protein histidine kinase activity (GO:0004673), Molecular Function: signal transducer activity (GO:0004871), Molecular Function: protein binding (GO:…
Os02g0307000	0.407396	0.00556006			Guanylate-binding protein family protein.	Molecular Function: GTPase activity (GO:0003924), Molecular Function: GTP binding (GO:0005525)
Os03g0158500	0.407355	0.00186281	0	0	YT521-B-like protein family protein.	0
Os02g0730300	0.404203	0.00176706	OsHAK25	HIGH-AFFINITY POTASSIUM(K+) TRANSPORTER 25	Similar to Potassium transporter HAK3p (Fragment).	Biological Process: potassium ion transmembrane transport (GO:0071805), Cellular Component: membrane (GO:0016020), Molecular Function: potassium ion transmembrane transporter activity (GO:0015079)
Os04g0568400	0.403867	0.000142336	OsWD40-106	0	WD40 repeat-like domain containing protein.	Molecular Function: protein binding (GO:0005515)
Os04g0590400	0.403789	0.0074488			GRAS transcription factor, Drought stress response	0
Os05g0256500	0.39906	0.00504703			Protein kinase, catalytic domain domain containing protein.	Biological Process: protein phosphorylation (GO:0006468), Molecular Function: protein kinase activity (GO:0004672), Molecular Function: protein serine/threonine kinase activity (GO:0004674), Molecular Function: protein tyrosine kinase activity (GO:0004713), Molecular Function: ATP binding (GO:0005524), Molecular Function: transferase activity, transferring phosphorus-containing groups (GO:0016772)
Os03g0391700	0.39249	0.00161606	OsbHLH138	0	Helix-loop-helix DNA-binding domain containing protein.	0
Os07g0495900	0.389673	0.00564134			Similar to low-level beta-amylase 1.	Biological Process: nuclear-transcribed mRNA catabolic process, nonsense-mediated decay (GO:0000184), Cellular Component: cytoplasm (GO:0005737), Molecular Function: DNA binding (GO:0003677), Molecular Function: helicase activity (GO:0004386), Molecular Function: ATP binding (GO:0005524), Molecular Function: zinc ion binding (GO:0008270), Molecular Function: hydrolase activity (GO:0016787)
Os03g0773100	0.385289	0.00361236			Similar to Myb/SANT domain protein.	Biological Process: regulation of transcription, DNA-dependent (GO:0006355), Molecular Function: DNA binding (GO:0003677), Molecular Function: protein binding (GO:0005515)
Os03g0213300	0.38337	0.00979891			Phosphopantetheine attachment site domain containing protein.	0
Os04g0584300	0.379111	0.00722545	OsPP2C43, PP2C43, OsPP68	0	Similar to Catalytic/ protein phosphatase type 2C.	Biological Process: protein dephosphorylation (GO:0006470), Cellular Component: protein serine/threonine phosphatase complex (GO:0008287), Molecular Function: catalytic activity (GO:0003824), Molecular Function: protein serine/threonine phosphatase activity (GO:0004722)
Os04g0437600	0.37814	0.00398398			Mitogen activated protein kinase kinase kinase 3 domain containing protein.	Biological Process: protein phosphorylation (GO:0006468), Molecular Function: protein kinase activity (GO:0004672), Molecular Function: protein serine/threonine kinase activity (GO:0004674), Molecular Function: ATP binding (GO:0005524), Molecular Function: transferase activity, transferring phosphorus-containing groups (GO:0016772)
Os04g0672100	0.37624	0.000429332			Similar to Phytosulfokine receptor precursor (EC 2.7.1.37) (Phytosulfokine LRR receptor kinase).	Biological Process: protein phosphorylation (GO:0006468), Molecular Function: protein kinase activity (GO:0004672), Molecular Function: protein serine/threonine kinase activity (GO:0004674), Molecular Function: protein tyrosine kinase activity (GO:0004713), Molecular Function: protein binding (GO:0005515), Molecular Function: ATP binding (GO:0005524), Molecular Function: transferase activity, tra…
Os09g0570400	0.373061	0.00214342	OsPT24	PHOSPHATE TRANSPORTER 24	Major facilitator superfamily protein.	Biological Process: transmembrane transport (GO:0055085), Cellular Component: integral to membrane (GO:0016021)
Os03g0311300	0.372771	0.00872232			Similar to HAD-superfamily hydrolase, subfamily IA, variant 3 containing protein, expressed.	Biological Process: metabolic process (GO:0008152), Molecular Function: catalytic activity (GO:0003824), Molecular Function: hydrolase activity (GO:0016787)
Os04g0306800	0.372342	0.00421791			RNA recognition motif, RNP-1 domain containing protein.	Molecular Function: nucleotide binding (GO:0000166), Molecular Function: nucleic acid binding (GO:0003676)
Os08g0485700	0.37207	0.00151281			Methyl-CpG DNA binding domain containing protein.	Cellular Component: intracellular (GO:0005622), Cellular Component: nucleus (GO:0005634), Molecular Function: DNA binding (GO:0003677), Molecular Function: zinc ion binding (GO:0008270)
Os12g0607000	0.364194	0.00788813			Similar to homocysteine S-methyltransferase-2.	Molecular Function: homocysteine S-methyltransferase activity (GO:0008898)
Os05g0405900	0.361851	0.00909915	OsATG18f, OsWD40-118	0	WD40 repeat-like domain containing protein.	Molecular Function: protein binding (GO:0005515)
Os10g0485300	0.353153	0.00185711			Hypothetical conserved gene.	0
Os03g0646900	0.347271	0.00863332	OsPPKL1, qGL3, OsPP54	0	Protein phosphatase with Kelch-like repeat domain, Serine/threonine phosphatase (EC:3.1.3.16), Regulation of grain length and yield	Biological Process: brassinosteroid mediated signaling pathway (GO:0009742), Molecular Function: phosphoprotein phosphatase activity (GO:0004721), Molecular Function: protein binding (GO:0005515), Molecular Function: hydrolase activity (GO:0016787)
Os11g0607200	0.34715	0.0039173	OsSERL1, OsBAK1-8	0	Protein kinase, core domain containing protein.	Biological Process: protein phosphorylation (GO:0006468), Molecular Function: protein kinase activity (GO:0004672), Molecular Function: protein serine/threonine kinase activity (GO:0004674), Molecular Function: protein tyrosine kinase activity (GO:0004713), Molecular Function: protein binding (GO:0005515), Molecular Function: ATP binding (GO:0005524), Molecular Function: transferase activity, tra…
Os01g0924400	0.346729	0.00258409	OsTCP6, TCP6	0	Similar to Auxin-induced basic helix-loop-helix transcription factor.	0
Os04g0686200	0.341002	0.00391903			Similar to Chromosome condensation regulator protein (Fragment).	Molecular Function: protein binding (GO:0005515), Molecular Function: metal ion binding (GO:0046872)
Os06g0237502	0.339057	0.00699693			Similar to EMB2004.	0
Os04g0441900	0.335258	0.00577961			Cleft lip and palate transmembrane 1 family protein.	0
Os03g0192500	0.334999	0.00105652	OsBIPP2C1, OsPP45	0	Sporulation stage II, protein E C-terminal domain containing protein.	Molecular Function: catalytic activity (GO:0003824)
Os03g0843600	0.332428	0.00741038	Os-CASTOR	CATION CHANNEL PROTEIN	Ion channel DMI1., Cation channen protein.	Molecular Function: nucleotide binding (GO:0000166)
Os03g0860000	0.332098	0.00818102			ASCH domain domain containing protein.	0
Os01g0647700	0.330458	0.00975353			Epoxide hydrolase family protein.	Molecular Function: catalytic activity (GO:0003824)
Os02g0618200	0.329799	0.00316609	OsTOC1, OsPRR1, Os-PRR1, PRR1, OsRRA21, OsCCT07	PSEUDO-RESPONSE REGULATOR 1	Circadian-associated rice pseudo response regulator, Control of flowering time	Biological Process: phosphorelay signal transduction system (GO:0000160), Molecular Function: protein binding (GO:0005515)
Os01g0808100	0.327702	0.00443689	OsbZIP08, OsbZIP8	b-ZIP TRANSCRIPTION FACTOR 8	Similar to BZIP transcription factor.	Biological Process: regulation of transcription, DNA-dependent (GO:0006355), Molecular Function: sequence-specific DNA binding transcription factor activity (GO:0003700), Molecular Function: sequence-specific DNA binding (GO:0043565), Molecular Function: protein dimerization activity (GO:0046983)
Os05g0113000	0.326983	0.0042228			Amino acid-binding ACT domain containing protein.	Biological Process: metabolic process (GO:0008152), Molecular Function: amino acid binding (GO:0016597)
Os01g0148050	0.325244	0.00722545			Hypothetical conserved gene.	0
Os01g0936200	0.32311	0.00637493			Lipase, class 3 family protein.	Biological Process: lipid metabolic process (GO:0006629), Molecular Function: triglyceride lipase activity (GO:0004806)
Os10g0488800	0.319961	0.00773178	OSMYOVIIIB, OsMyoVIIIB	0	Myosin head, motor region domain containing protein.	Cellular Component: myosin complex (GO:0016459), Molecular Function: motor activity (GO:0003774), Molecular Function: protein binding (GO:0005515), Molecular Function: ATP binding (GO:0005524)
Os04g0382300	0.319552	0.00304758	OsCBSCBS3	_	Similar to SNF1-related protein kinase regulatory gamma subunit 1 (AKIN gamma1) (AKING1).	Biological Process: metabolic process (GO:0008152), Molecular Function: catalytic activity (GO:0003824), Molecular Function: protein binding (GO:0005515)
Os03g0346700	0.319269	0.00126183	JMJ716	0	Similar to JmjC domain containing protein, expressed.	Molecular Function: protein binding (GO:0005515), Molecular Function: zinc ion binding (GO:0008270)
Os06g0229300	0.312792	0.00827033			Similar to Hox2b protein.	Biological Process: regulation of transcription, DNA-dependent (GO:0006355), Molecular Function: DNA binding (GO:0003677), Molecular Function: sequence-specific DNA binding transcription factor activity (GO:0003700), Molecular Function: protein binding (GO:0005515), Molecular Function: zinc ion binding (GO:0008270), Molecular Function: sequence-specific DNA binding (GO:0043565)
Os06g0561200	0.297273	0.00330582			Similar to Potassium/proton antiporter-like protein.	Biological Process: cation transport (GO:0006812), Biological Process: transmembrane transport (GO:0055085), Cellular Component: integral to membrane (GO:0016021), Molecular Function: solute:hydrogen antiporter activity (GO:0015299)
Os03g0344700	0.295588	0.00604186			Similar to AAA-type ATPase family protein.	Molecular Function: nucleotide binding (GO:0000166), Molecular Function: ATP binding (GO:0005524), Molecular Function: nucleoside-triphosphatase activity (GO:0017111)
Os03g0832600	0.27448	0.000881424			Similar to Galactokinase (EC 2.7.1.6) (Galactose kinase).	Biological Process: galactose metabolic process (GO:0006012), Biological Process: metabolic process (GO:0008152), Biological Process: phosphorylation (GO:0016310), Biological Process: carbohydrate phosphorylation (GO:0046835), Cellular Component: cytoplasm (GO:0005737), Molecular Function: galactokinase activity (GO:0004335), Molecular Function: ATP binding (GO:0005524), Molecular Function: kinas…
Os03g0707300	0.248558	0.00863448			Conserved hypothetical protein.	0
Os05g0511400	0.215419	0.00894807			Similar to Protein kinase GhCLK1 (Fragment).	Biological Process: protein phosphorylation (GO:0006468), Molecular Function: protein kinase activity (GO:0004672), Molecular Function: protein serine/threonine kinase activity (GO:0004674), Molecular Function: ATP binding (GO:0005524), Molecular Function: transferase activity, transferring phosphorus-containing groups (GO:0016772)
Os06g0712300	-0.253449	0.00160747			EF-Hand type domain containing protein.	Biological Process: metabolic process (GO:0008152), Molecular Function: calcium ion binding (GO:0005509), Molecular Function: transferase activity, transferring acyl groups (GO:0016746)
Os03g0392300	-0.275622	0.00591564	OsGB1a, GB1a	GTP-BINDING PROTEIN 1A	Similar to GTP-binding protein-like.	Biological Process: small GTPase mediated signal transduction (GO:0007264), Cellular Component: intracellular (GO:0005622), Molecular Function: GTP binding (GO:0005525)
Os07g0574800	-0.280116	0.00764202	OsTubA1, TubA1, OS-TubA3, TubA3	TUBULIN ALPHA-1 CHAIN	Tubulin alpha-1 chain.	Biological Process: GTP catabolic process (GO:0006184), Biological Process: microtubule-based process (GO:0007017), Biological Process: microtubule-based movement (GO:0007018), Biological Process: protein polymerization (GO:0051258), Cellular Component: microtubule (GO:0005874), Cellular Component: protein complex (GO:0043234), Molecular Function: GTPase activity (GO:0003924), Molecular Function:…
Os09g0556000	-0.286258	0.00696034			Signal peptidase 22 kDa subunit family protein.	Biological Process: signal peptide processing (GO:0006465), Cellular Component: signal peptidase complex (GO:0005787), Cellular Component: integral to membrane (GO:0016021), Molecular Function: peptidase activity (GO:0008233)
Os12g0197700	-0.2921	0.000543841			Region of unknown function, putative Zinc finger, XS and XH domain containing protein.	0
Os05g0392700	-0.296797	0.00592208			Mitochondrial substrate carrier family protein.	0
Os10g0544900	-0.305005	0.00577961	OsPP2C72, PP2C72, OsPP114	0	Similar to Protein phosphatase 2C-like protein.	Biological Process: protein dephosphorylation (GO:0006470), Cellular Component: protein serine/threonine phosphatase complex (GO:0008287), Molecular Function: catalytic activity (GO:0003824), Molecular Function: protein serine/threonine phosphatase activity (GO:0004722)
Os12g0641400	-0.308643	0.00610761	OsSUT2(t), SUT2M, OsSUT2, OsSUT2M, OsSUT5	SUCROSE TRANSPORTER 2	Similar to Sucrose transporter.	0
Os01g0134500	-0.316705	0.00471429	OsSTE1, OsDWF7	0	Similar to Delta-7-sterol-C5(6)-desaturase (EC 1.3.3.-) (Delta-7-C-5 sterol desaturase) (Delta7-sterol-C5-desaturase).	Biological Process: fatty acid biosynthetic process (GO:0006633), Biological Process: oxidation-reduction process (GO:0055114), Molecular Function: iron ion binding (GO:0005506), Molecular Function: oxidoreductase activity (GO:0016491)
Os01g0723400	-0.318366	0.00594153	OscytME1	NADP-MALIC ENZYME 2	NADP-malic enzyme, Splicing variant	Biological Process: oxidation-reduction process (GO:0055114), Molecular Function: malic enzyme activity (GO:0004470), Molecular Function: malate dehydrogenase (decarboxylating) (NAD+) activity (GO:0004471), Molecular Function: NAD binding (GO:0051287)
Os01g0659200	-0.319521	0.00564134	v-ATP-E	V-ATPASE SUBUNIT E	Similar to Vacuolar ATP synthase subunit E (EC 3.6.3.14) (V-ATPase E subunit) (Vacuolar proton pump E subunit).	Biological Process: ATP hydrolysis coupled proton transport (GO:0015991), Cellular Component: proton-transporting two-sector ATPase complex, catalytic domain (GO:0033178), Molecular Function: proton-transporting ATPase activity, rotational mechanism (GO:0046961)
Os02g0625500	-0.328471	0.000623215			Similar to Adenosine kinase-like protein (Fragment).	Biological Process: purine ribonucleoside salvage (GO:0006166), Molecular Function: adenosine kinase activity (GO:0004001), Molecular Function: phosphotransferase activity, alcohol group as acceptor (GO:0016773)
Os01g0267200	-0.331408	0.00838484	OsRpn11, Rpn11	19S REGULATORY PARTICLE NON-ATPASE SUBUNIT 11	Similar to 26S proteasome non-ATPase regulatory subunit 14 (26S proteasome regulatory subunit rpn11).	Molecular Function: protein binding (GO:0005515)
Os05g0556000	-0.336371	0.00501267			Oxoglutarate/iron-dependent oxygenase domain containing protein.	Biological Process: oxidation-reduction process (GO:0055114), Molecular Function: oxidoreductase activity (GO:0016491), Molecular Function: oxidoreductase activity, acting on paired donors, with incorporation or reduction of molecular oxygen, 2-oxoglutarate as one donor, and incorporation of one atom each of oxygen into both donors (GO:0016706)
Os03g0102000	-0.346601	0.00866039			Conserved hypothetical protein.	0
Os09g0533300	-0.350518	0.00551371			Metallophosphoesterase domain containing protein.	Molecular Function: hydrolase activity (GO:0016787)
Os03g0743900	-0.350615	0.00143998	OsATPS, ATPS, OsaATPS, PAPSS	0	Similar to ATP sulfurylase.	Biological Process: sulfate assimilation (GO:0000103), Molecular Function: sulfate adenylyltransferase (ATP) activity (GO:0004781)
Os12g0615500	-0.35705	0.00762798			Similar to Hydrolase-like protein.	Molecular Function: hydrolase activity (GO:0016787)
Os09g0442300	-0.362898	0.00888147	0	ORYZAIN GAMMA CHAIN	Similar to Oryzain gamma chain (Fragment).	Biological Process: proteolysis (GO:0006508), Molecular Function: cysteine-type endopeptidase activity (GO:0004197), Molecular Function: cysteine-type peptidase activity (GO:0008234)
Os02g0117200	-0.367757	0.00125532			Similar to MIR-interacting saposin-like protein.	0
Os04g0338000	-0.369871	0.00065214			Similar to IN2-2 protein.	0
Os07g0683900	-0.371127	0.00592208			Ricin B-related lectin domain containing protein.	0
Os04g0592400	-0.378177	0.000129871			t-snare domain containing protein.	0
Os07g0181800	-0.382055	0.0026767			Protein of unknown function DUF2346 domain containing protein.	0
Os05g0391200	-0.386991	0.00244916			Protein of unknown function DUF288 domain containing protein.	0
Os02g0122300	-0.38808	0.00136097	BIP121	0	Translation initiation factor eIF3 subunit domain containing protein.	0
Os08g0490000	-0.389531	0.000595035	OsbHLH031	0	Helix-loop-helix DNA-binding domain containing protein.	0
Os06g0274300	-0.392464	0.00909915	SEPK1	0	Similar to BRASSINOSTEROID INSENSITIVE 1-associated receptor kinase 1.	Molecular Function: protein binding (GO:0005515)
Os08g0191100	-0.397383	0.00855056	OsACO1, ACO1	0	Similar to Iron-responsive element binding protein (Fragment).	0
Os01g0918300	-0.399759	0.0074488	smt3, SMT3	0	Ubiquitin-like protein SMT3.	Molecular Function: protein binding (GO:0005515)
Os02g0761900	-0.401342	8.48226e-05			Dimethylmenaquinone methyltransferase family protein.	Biological Process: regulation of RNA metabolic process (GO:0051252), Molecular Function: ribonuclease inhibitor activity (GO:0008428)
Os08g0549300	-0.402654	0.00293769	0	0	Similar to Acyl carrier protein III, chloroplast precursor (ACP III).	Biological Process: fatty acid biosynthetic process (GO:0006633), Molecular Function: acyl carrier activity (GO:0000036), Molecular Function: phosphopantetheine binding (GO:0031177), Molecular Function: cofactor binding (GO:0048037)
Os12g0236400	-0.402744	0.0069896	Adk-a	ADENYLATE KINASE A	Adenylate kinase A (EC 2.7.4.3) (ATP-AMP transphosphorylase).	Biological Process: nucleobase-containing compound metabolic process (GO:0006139), Biological Process: nucleotide phosphorylation (GO:0046939), Molecular Function: adenylate kinase activity (GO:0004017), Molecular Function: ATP binding (GO:0005524), Molecular Function: phosphotransferase activity, phosphate group as acceptor (GO:0016776), Molecular Function: nucleotide kinase activity (GO:0019201…
Os04g0687100	-0.403083	0.00627753	0	0	Similar to Soluble inorganic pyrophosphatase (EC 3.6.1.1) (Pyrophosphate phospho- hydrolase) (PPase).	0
Os02g0541700	-0.408479	0.00846989			Similar to Ubiquinol-cytochrome c reductase complex 7.8 kDa protein (EC 1.10.2.2) (Mitochondrial hinge protein) (CR7).	Biological Process: mitochondrial electron transport, ubiquinol to cytochrome c (GO:0006122), Molecular Function: ubiquinol-cytochrome-c reductase activity (GO:0008121)
Os10g0529300	-0.410719	0.00897071	OsGSTU18, OsGSTU7, GSTU7	TAU GLUTATHIONE S-TRANSFERASE 18	Similar to Tau class GST protein 3.	Molecular Function: protein binding (GO:0005515)
Os02g0734900	-0.414598	0.00699693			Similar to Erwinia induced protein 2.	Biological Process: intracellular protein transport (GO:0006886), Cellular Component: endoplasmic reticulum (GO:0005783), Cellular Component: integral to membrane (GO:0016021)
Os06g0256300	-0.416387	0.00932723			Similar to Calmodulin-binding heat-shock protein.	Biological Process: lipid metabolic process (GO:0006629), Biological Process: lipid catabolic process (GO:0016042), Molecular Function: carboxylesterase activity (GO:0004091), Molecular Function: triglyceride lipase activity (GO:0004806)
Os12g0560300	-0.419801	0.00884002			Similar to NTGB2 (Fragment).	Biological Process: intracellular protein transport (GO:0006886), Cellular Component: intracellular (GO:0005622), Molecular Function: GTP binding (GO:0005525)
Os02g0562600	-0.421676	0.00791198	OsMLO10, MLO10	POWDERY-MILDEW-RESISTANCE PROTEIN O_	Similar to Seven trans-membrane protein (Fragment).	Biological Process: cell death (GO:0008219), Cellular Component: integral to membrane (GO:0016021)
Os06g0542150	-0.425397	4.1921e-06			Non-protein coding transcript.	0
Os05g0494200	-0.426285	0.0039173	Oc2*, Oc2, OC-II, OC-III, OCII, OsCYS2	ORYZACYSTATIN 2	Similar to Cystatin (Fragment).	0
Os06g0134000	-0.428813	0.00186281	rps20	RIBOSOMAL PROTEIN S20	Similar to 40S ribosomal protein S20.	Biological Process: translation (GO:0006412), Cellular Component: intracellular (GO:0005622), Cellular Component: ribosome (GO:0005840), Cellular Component: small ribosomal subunit (GO:0015935), Molecular Function: RNA binding (GO:0003723), Molecular Function: structural constituent of ribosome (GO:0003735)
Os10g0407000	-0.431654	0.00125531	OsPME29	PECTIN METHYLESTERASE 29	Pectin lyase fold/virulence factor domain containing protein.	Biological Process: cell wall modification (GO:0042545), Cellular Component: cell wall (GO:0005618), Molecular Function: pectinesterase activity (GO:0030599)
Os04g0599000	-0.431773	0.00643908	OsWAK53, OsWAK53a	WALL-ASSOCIATED KINASE 53	Similar to WAK53a - OsWAK receptor-like protein kinase.	Cellular Component: integral to membrane (GO:0016021), Molecular Function: protein serine/threonine kinase activity (GO:0004674)
Os03g0805400	-0.443325	0.00592208			Phosphatidic acid phosphatase type 2/haloperoxidase domain containing protein.	Cellular Component: membrane (GO:0016020), Molecular Function: catalytic activity (GO:0003824)
Os01g0823100	-0.448811	0.00924147	OsEXP2, OsEXP2(Os-EXP2), Os-EXP2, EXPA2, OsEXPA2, OsaEXPa1.23, RiExB, RiExC, Os-EXPA2	ALPHA-EXPANSIN 2	Alpha-expansin OsEXPA2.	Biological Process: plant-type cell wall organization (GO:0009664), Cellular Component: extracellular region (GO:0005576)
Os07g0633200	-0.458837	0.00330582			Similar to SC35-like splicing factor SCL30a, 30a kD.	Molecular Function: nucleotide binding (GO:0000166), Molecular Function: nucleic acid binding (GO:0003676)
Os08g0464000	-0.459605	0.0060439			Activator of Hsp90 ATPase homologue 1-like family protein.	Biological Process: response to stress (GO:0006950), Cellular Component: cytoplasm (GO:0005737), Molecular Function: ATPase activator activity (GO:0001671), Molecular Function: chaperone binding (GO:0051087)
Os01g0948600	-0.462057	0.00328117			Conserved hypothetical protein.	0
Os08g0176200	-0.462741	0.00261869	ORK1, OsRLCK246, RLCK246	0	Serine/threonine protein kinase-related domain containing protein.	Biological Process: protein phosphorylation (GO:0006468), Molecular Function: protein kinase activity (GO:0004672), Molecular Function: protein serine/threonine kinase activity (GO:0004674), Molecular Function: protein tyrosine kinase activity (GO:0004713), Molecular Function: ATP binding (GO:0005524), Molecular Function: transferase activity, transferring phosphorus-containing groups (GO:0016772)
Os03g0438100	-0.463523	0.00308773	OsAOC, AOC1, OsAOC1, HB, CPM2	ALLENE OXIDE CYCLASE	Allene oxide cyclase, Biosynthesis of jasmonic acid, Defence response	Molecular Function: isomerase activity (GO:0016853), Cellular Component: chloroplast (GO:0009507)
Os02g0261100	-0.464755	0.00469173	OsUBC5b, OsUBC15, UBC15	UBIQUITIN CONJUGATING ENZYME 5B	Ubiquitin-conjugating enzyme E2, Elicitor-induced defense response	0
Os10g0564300	-0.466388	0.0053687	0	0	Similar to 60S ribosomal protein L27.	Biological Process: translation (GO:0006412), Cellular Component: intracellular (GO:0005622), Cellular Component: ribosome (GO:0005840), Molecular Function: structural constituent of ribosome (GO:0003735)
Os05g0323900	-0.466712	0.00891564			Manganese superoxide dismutase, Heat-stress tolerance	Biological Process: superoxide metabolic process (GO:0006801), Biological Process: oxidation-reduction process (GO:0055114), Molecular Function: superoxide dismutase activity (GO:0004784), Molecular Function: metal ion binding (GO:0046872)
Os01g0600000	-0.469671	0.00495123			Similar to Copia-like retroelement pol polyprotein.	Biological Process: ATP synthesis coupled proton transport (GO:0015986), Cellular Component: mitochondrial proton-transporting ATP synthase complex, coupling factor F(o) (GO:0000276), Molecular Function: hydrogen ion transmembrane transporter activity (GO:0015078)
Os10g0422000	-0.469978	0.00147928			Conserved hypothetical protein.	0
Os01g0238600	-0.475265	0.00367208			Nucleic acid-binding, OB-fold domain containing protein.	0
Os08g0380100	-0.477375	0.00858799	OsBURP12	0	Similar to Polygalacturonase isoenzyme 1 beta subunit (Fragment).	0
Os07g0109700	-0.478936	0.00860614			Conserved hypothetical protein.	0
Os12g0547600	-0.481668	0.00330582	CaMBP	0	Calmodulin binding protein-like domain containing protein.	0
Os11g0269900	-0.483614	0.00822772			Hypothetical conserved gene.	Biological Process: metabolic process (GO:0008152), Molecular Function: catalytic activity (GO:0003824)
Os10g0419300	-0.486795	0.00264075	HSfA2c, OsHsfA2c, OsHsf-25, rHsf6, OsHSF6, HSF25, HSF6	HEAT STRESS TRANSCRIPTION FACTOR A2c	Similar to Heat shock transcription factor 31 (Fragment).	Biological Process: regulation of transcription, DNA-dependent (GO:0006355), Cellular Component: nucleus (GO:0005634), Molecular Function: sequence-specific DNA binding transcription factor activity (GO:0003700), Molecular Function: sequence-specific DNA binding (GO:0043565)
Os10g0457500	-0.489995	0.0079917			Similar to Yeast ham (Hydroxylaminopurine sensitivity) related protein 1 (HAM-1- like protein).	Molecular Function: hydrolase activity (GO:0016787)
Os01g0328400	-0.492783	0.00256746	0	UBIQUITIN 5	Ubiquitin.	Biological Process: translation (GO:0006412), Cellular Component: intracellular (GO:0005622), Cellular Component: ribosome (GO:0005840), Molecular Function: structural constituent of ribosome (GO:0003735), Molecular Function: protein binding (GO:0005515)
Os06g0149500	-0.497962	0.00577961			Conserved hypothetical protein.	0
Os06g0183700	-0.498066	0.00171121			Hypothetical conserved gene.	0
Os11g0557000	-0.498457	0.00601986			Phytosulfokine family protein.	Biological Process: cell proliferation (GO:0008283), Cellular Component: extracellular region (GO:0005576), Molecular Function: growth factor activity (GO:0008083)
Os06g0591600	-0.500124	9.87583e-07			Similar to Hemoglobin Hb2.	Biological Process: oxygen transport (GO:0015671), Molecular Function: iron ion binding (GO:0005506), Molecular Function: oxygen binding (GO:0019825), Molecular Function: heme binding (GO:0020037)
Os04g0106300	-0.501467	0.000412156	OsARG, ARG, Nglf, Nglf-1, OsAGM, AGM	ARGINASE	Arginine hydrolysis enzyme, Arginase, Panicle development and grain production	Molecular Function: hydrolase activity, acting on carbon-nitrogen (but not peptide) bonds, in linear amidines (GO:0016813), Molecular Function: metal ion binding (GO:0046872)
Os11g0109500	-0.50244	0.000596984			Staphylococcal nuclease (SNase-like), OB-fold domain containing protein.	Molecular Function: nucleic acid binding (GO:0003676), Molecular Function: hydrolase activity, acting on ester bonds (GO:0016788)
Os02g0782900	-0.502673	0.00304816			Conserved hypothetical protein.	0
Os03g0388500	-0.504076	5.38683e-06	0	0	Similar to Anther ethylene-upregulated protein ER1 (Fragment).	Molecular Function: protein binding (GO:0005515)
Os05g0529400	-0.504214	0.00215737			Similar to ubiquitin domain containing 1.	0
Os03g0116400	-0.504281	0.00121362	OsRhmbd7, RHMBD7	0	Similar to Membrane protein.	Biological Process: proteolysis (GO:0006508), Cellular Component: integral to membrane (GO:0016021), Molecular Function: serine-type endopeptidase activity (GO:0004252)
Os01g0814900	-0.505405	0.000270842	NFR	0	Similar to Cytochrome b5 reductase.	Biological Process: oxidation-reduction process (GO:0055114), Molecular Function: oxidoreductase activity (GO:0016491)
Os12g0541200	-0.507466	0.000268989			Conserved hypothetical protein.	0
Os03g0321900	-0.509275	0.00830943			Similar to tRNA-specific adenosine deaminase.	Molecular Function: catalytic activity (GO:0003824), Molecular Function: zinc ion binding (GO:0008270), Molecular Function: hydrolase activity (GO:0016787)
Os11g0107000	-0.511163	0.0039173	OsTBL2, TBL2	0	Xylan acetyltransferase, Resistance to bacterial leaf blight disease	0
Os08g0278900	-0.512516	0.00181198	0	_	MIR domain containing protein.	Cellular Component: membrane (GO:0016020)
Os08g0280600	-0.512845	0.00388064			Reticulon domain containing protein.	Cellular Component: endoplasmic reticulum (GO:0005783)
Os03g0757900	-0.516229	0.00094564			Similar to UDP-glucose 6-dehydrogenase (EC 1.1.1.22) (UDP-Glc dehydrogenase) (UDP-GlcDH) (UDPGDH).	Biological Process: oxidation-reduction process (GO:0055114), Molecular Function: nucleotide binding (GO:0000166), Molecular Function: oxidoreductase activity (GO:0016491), Molecular Function: oxidoreductase activity, acting on the CH-OH group of donors, NAD or NADP as acceptor (GO:0016616), Molecular Function: NAD binding (GO:0051287)
Os05g0111200	-0.516579	0.00165293			Similar to Amino acid selective channel protein.	0
Os05g0507300	-0.518771	0.000192797			Similar to Calreticulin-3.	Biological Process: protein folding (GO:0006457), Cellular Component: endoplasmic reticulum (GO:0005783), Molecular Function: calcium ion binding (GO:0005509), Molecular Function: unfolded protein binding (GO:0051082)
Os05g0108800	-0.520241	2.11776e-07	0	0	Cytochrome b5.	Molecular Function: heme binding (GO:0020037)
Os03g0710700	-0.5207	0.00120543			Similar to predicted protein.	Biological Process: glycolipid transport (GO:0046836), Cellular Component: cytoplasm (GO:0005737), Molecular Function: glycolipid transporter activity (GO:0017089), Molecular Function: glycolipid binding (GO:0051861)
Os04g0386600	-0.522177	0.00307121			Pyruvate/Phosphoenolpyruvate kinase, catalytic core domain containing protein.	Biological Process: metabolic process (GO:0008152), Molecular Function: catalytic activity (GO:0003824)
Os02g0284600	-0.524755	0.00361236			Similar to 60S ribosomal protein L27.	Biological Process: translation (GO:0006412), Cellular Component: intracellular (GO:0005622), Cellular Component: ribosome (GO:0005840), Molecular Function: structural constituent of ribosome (GO:0003735)
Os02g0635200	-0.526191	0.00182719	NIT1, OsNIT2, NIT2	0	Similar to Nitrilase 2 (EC 3.5.5.1).	Biological Process: nitrogen compound metabolic process (GO:0006807), Molecular Function: hydrolase activity, acting on carbon-nitrogen (but not peptide) bonds (GO:0016810)
Os08g0269500	-0.528396	0.00857092			Conserved hypothetical protein.	0
Os06g0178900	-0.530383	0.000350532	OVP2	0	Vacuolar H+-pyrophosphatase (EC 3.6.1.1) (Ovp2).	Biological Process: proton transport (GO:0015992), Cellular Component: membrane (GO:0016020), Molecular Function: inorganic diphosphatase activity (GO:0004427), Molecular Function: hydrogen-translocating pyrophosphatase activity (GO:0009678)
Os08g0345700	-0.531445	8.5305e-08	OsPFPA3, PFPA3	0	Similar to Fructose-6-phosphate 1-phosphotransferase (Fragment).	Biological Process: glycolysis (GO:0006096), Cellular Component: 6-phosphofructokinase complex (GO:0005945), Molecular Function: 6-phosphofructokinase activity (GO:0003872), Molecular Function: ATP binding (GO:0005524), Molecular Function: diphosphate-fructose-6-phosphate 1-phosphotransferase activity (GO:0047334)
Os11g0266500	-0.532651	3.3165e-07			Similar to NB-ARC domain containing protein, expressed.	0
Os04g0111200	-0.533629	0.00910954			Similar to ATP sulfurylase (Fragment).	Biological Process: sulfate assimilation (GO:0000103), Molecular Function: sulfate adenylyltransferase (ATP) activity (GO:0004781)
Os03g0285700	-0.53775	0.00183039	OsAPX1, APXa, OsAPx01, OsAPx1, OSAPX1, APx1, cAPX	ASCORBATE PEROXIDASE 1	Similar to L-ascorbate peroxidase.	Biological Process: response to oxidative stress (GO:0006979), Biological Process: oxidation-reduction process (GO:0055114), Molecular Function: peroxidase activity (GO:0004601), Molecular Function: heme binding (GO:0020037)
Os04g0608900	-0.539888	0.00862597	OsDPK4	0	Similar to Serine/thronine protein kinase-like protein.	Biological Process: protein phosphorylation (GO:0006468), Molecular Function: protein kinase activity (GO:0004672), Molecular Function: protein serine/threonine kinase activity (GO:0004674), Molecular Function: protein tyrosine kinase activity (GO:0004713), Molecular Function: ATP binding (GO:0005524), Molecular Function: transferase activity, transferring phosphorus-containing groups (GO:0016772)
Os08g0558900	-0.540054	0.00842262	IF1-1	0	Similar to F1F0-ATPase inhibitor protein.	Biological Process: negative regulation of nucleotide metabolic process (GO:0045980), Cellular Component: mitochondrion (GO:0005739), Molecular Function: enzyme inhibitor activity (GO:0004857)
Os04g0689500	-0.544715	0.000895365			Similar to H0814G11.12 protein.	0
Os07g0634900	-0.553128	3.55038e-05			Hypothetical conserved gene.	Biological Process: regulation of transcription, DNA-dependent (GO:0006355), Molecular Function: DNA binding (GO:0003677), Molecular Function: protein binding (GO:0005515)
Os11g0432900	-0.553719	6.71548e-06	OsSCP56	SERINE CARBOXYPEPTIDASE 56	Peptidase S10, serine carboxypeptidase family protein.	Biological Process: proteolysis (GO:0006508), Molecular Function: serine-type carboxypeptidase activity (GO:0004185)
Os03g0733800	-0.554945	0.00312918	ERO1, Ero1	_	Endoplasmic reticulum oxidoreductin 1 family protein.	Biological Process: protein thiol-disulfide exchange (GO:0006467), Biological Process: oxidation-reduction process (GO:0055114), Cellular Component: endoplasmic reticulum membrane (GO:0005789), Molecular Function: oxidoreductase activity, acting on a sulfur group of donors, disulfide as acceptor (GO:0016671), Molecular Function: flavin adenine dinucleotide binding (GO:0050660)
Os03g0238600	-0.555069	0.000114599	OsPAP3c	PURPLE ACID PHOSPHATASE 3C	Similar to Purple acid phosphatase.	Molecular Function: hydrolase activity (GO:0016787)
Os04g0678400	-0.555906	0.00764202			Zinc finger, Dof-type domain containing protein.	Biological Process: regulation of transcription, DNA-dependent (GO:0006355), Molecular Function: DNA binding (GO:0003677), Molecular Function: zinc ion binding (GO:0008270)
Os02g0509500	-0.556893	0.00888147			Protein of unknown function DUF3339 domain containing protein.	0
Os05g0159300	-0.55938	0.000219351	OsGELP62, OsGELP62a, OsGELP62b, OsGELP62c	GDSL ESTERASE/LIPASE PROTEIN 62	Similar to Alpha-L-fucosidase 2.	0
Os03g0219200	-0.560256	4.98804e-07	OsSOD2	SUPEROXIDE DISMUTASE 2	Similar to Superoxide dismutase (EC 1.15.1.1).	Biological Process: superoxide metabolic process (GO:0006801), Biological Process: oxidation-reduction process (GO:0055114), Molecular Function: superoxide dismutase activity (GO:0004784), Molecular Function: metal ion binding (GO:0046872)
Os07g0644100	-0.562836	0.00142575	OsbZIP60, bZIP60	b-ZIP TRANSCRIPTION FACTOR 60	bZIP transcription factor, bZIP-1 domain containing protein.	Biological Process: regulation of transcription, DNA-dependent (GO:0006355), Molecular Function: sequence-specific DNA binding transcription factor activity (GO:0003700), Molecular Function: sequence-specific DNA binding (GO:0043565), Molecular Function: protein dimerization activity (GO:0046983)
Os06g0296700	-0.563196	0.00764202			C-type lectin, conserved site domain containing protein.	0
Os03g0126700	-0.569276	0.0014915			Similar to Barley stem rust resistance protein.	Biological Process: metal ion transport (GO:0030001), Molecular Function: metal ion binding (GO:0046872)
Os01g0559750	-0.569959	0.00856694			Hypothetical gene.	0
Os03g0213100	-0.574082	0.0049401	0	0	Similar to Sec61p.	Biological Process: protein transport (GO:0015031), Cellular Component: membrane (GO:0016020), Molecular Function: P-P-bond-hydrolysis-driven protein transmembrane transporter activity (GO:0015450)
Os01g0740600	-0.576077	0.00899716			Transferrin receptor-like, dimerisation domain containing protein.	0
Os01g0528800	-0.576873	0.00140959	CADL	0	Similar to Cinnamyl alcohol dehydrogenase.	Biological Process: cellular metabolic process (GO:0044237), Molecular Function: nucleotide binding (GO:0000166), Molecular Function: catalytic activity (GO:0003824), Molecular Function: coenzyme binding (GO:0050662)
Os07g0674100	-0.577281	0.000758802	OsUXS6, UXS-6	0	Hypothetical conserved gene.	Biological Process: cellular metabolic process (GO:0044237), Molecular Function: nucleotide binding (GO:0000166), Molecular Function: catalytic activity (GO:0003824), Molecular Function: coenzyme binding (GO:0050662)
Os05g0399200	-0.578033	3.86606e-05			Similar to Endo-1, 3;1, 4-beta-D-glucanase precursor (EC 3.2.1.-).	Molecular Function: hydrolase activity (GO:0016787)
Os06g0703300	-0.579679	0.000778182			Hypothetical conserved gene.	0
Os04g0385900	-0.580433	0.00314073			Similar to OSIGBa0148P16.1 protein.	0
Os09g0242600	-0.583602	0.00042628			Hypothetical protein.	0
Os03g0661300	-0.583754	0.00140804	OsTUB8, TUBB8	BETA TUBULIN 8	Beta-tubulin , Microtubules formation	Biological Process: microtubule-based process (GO:0007017), Biological Process: protein polymerization (GO:0051258), Molecular Function: GTPase activity (GO:0003924), Molecular Function: structural constituent of cytoskeleton (GO:0005200), Molecular Function: GTP binding (GO:0005525), Cellular Component: microtubule (GO:0005874), Cellular Component: protein complex (GO:0043234)
Os03g0363600	-0.592765	0.00120373			Similar to Sugar transporter-like protein.	Biological Process: transport (GO:0006810), Biological Process: transmembrane transport (GO:0055085), Cellular Component: membrane (GO:0016020), Cellular Component: integral to membrane (GO:0016021), Molecular Function: transporter activity (GO:0005215), Molecular Function: transmembrane transporter activity (GO:0022857), Molecular Function: substrate-specific transmembrane transporter activity (…
Os10g0510000	-0.593676	0.00134026	RAc2	0	Similar to actin.	Molecular Function: ATP binding (GO:0005524)
Os04g0435500	-0.596358	0.000724206	OsTCHQD1	TETRACHLOROHYDROQUINONE DEHYDROGENASE 1	Glutathione S-transferase, C-terminal-like domain containing protein.	Molecular Function: protein binding (GO:0005515)
Os03g0835900	-0.599016	0.000170196			Similar to Ferredoxin III, chloroplast precursor (Fd III).	Biological Process: electron transport chain (GO:0022900), Molecular Function: electron carrier activity (GO:0009055), Molecular Function: iron-sulfur cluster binding (GO:0051536), Molecular Function: 2 iron, 2 sulfur cluster binding (GO:0051537)
Os02g0189100	-0.600013	0.000239335			Mediator complex, subunit Med11 domain containing protein.	Biological Process: regulation of transcription from RNA polymerase II promoter (GO:0006357), Cellular Component: mediator complex (GO:0016592), Molecular Function: RNA polymerase II transcription cofactor activity (GO:0001104)
Os02g0827100	-0.602409	0.000413553			Similar to prolyl 4-hydroxylase alpha-2 subunit.	0
Os12g0576700	-0.602474	0.00145022	OsPAP1c, NPP4, OsNPP4	PURPLE ACID PHOSPHATASE 1C	Similar to Diphosphonucleotide phosphatase 1 precursor.	Molecular Function: acid phosphatase activity (GO:0003993), Molecular Function: hydrolase activity (GO:0016787), Molecular Function: metal ion binding (GO:0046872)
Os02g0804100	-0.60359	0.00574533			Similar to predicted protein.	Biological Process: translation (GO:0006412), Cellular Component: intracellular (GO:0005622), Cellular Component: ribosome (GO:0005840), Molecular Function: structural constituent of ribosome (GO:0003735)
Os11g0151300	-0.619127	0.00458698			Similar to 60S ribosomal protein L26-1.	Biological Process: translation (GO:0006412), Cellular Component: intracellular (GO:0005622), Cellular Component: ribosome (GO:0005840), Cellular Component: large ribosomal subunit (GO:0015934), Molecular Function: structural constituent of ribosome (GO:0003735)
Os07g0659400	-0.620481	0.000335986			Similar to rhythmically expressed protein.	Biological Process: metabolic process (GO:0008152), Molecular Function: catalytic activity (GO:0003824), Molecular Function: phosphoglycolate phosphatase activity (GO:0008967), Molecular Function: hydrolase activity (GO:0016787)
Os03g0231800	-0.621669	0.00628353			Similar to Squalene monooxygenase 1 (EC 1.14.99.7).	0
Os03g0758500	-0.622002	0.00386602	OsENODL12	EARLY NODULIN LIKE PROTEIN 12	Cupredoxin domain containing protein.	Molecular Function: copper ion binding (GO:0005507), Molecular Function: electron carrier activity (GO:0009055)
Os07g0631700	-0.623068	0.00712775			EF-Hand type domain containing protein.	Molecular Function: calcium ion binding (GO:0005509)
Os08g0500700	-0.62584	7.00915e-05	OsHSP82A, hsp82A, HSP90	HEAT SHOCK PROTEIN 82A	Similar to Heat shock protein 82.	Biological Process: protein folding (GO:0006457), Biological Process: response to stress (GO:0006950), Molecular Function: ATP binding (GO:0005524), Molecular Function: unfolded protein binding (GO:0051082)
Os01g0192600	-0.627301	0.00373764	SF21	0	Ndr family protein.	0
Os03g0408300	-0.628532	0.00140957			Similar to 60S ribosomal protein L27a-3.	Biological Process: translation (GO:0006412), Cellular Component: intracellular (GO:0005622), Cellular Component: ribosome (GO:0005840), Molecular Function: structural constituent of ribosome (GO:0003735)
Os07g0622900	-0.630296	0.00311922			Endoplasmic reticulum (ER) membrane protein, Early tapetum development and meiosis	Biological Process: signal peptide processing (GO:0006465), Molecular Function: peptidase activity (GO:0008233), Cellular Component: signal peptidase complex (GO:0005787), Cellular Component: integral component of membrane (GO:0016021)
Os01g0147900	-0.632461	7.35045e-07	tpi*, tips, TI	TRIOSEPHOSPHATE ISOMERASE	Triosephosphate isomerase, cytosolic (EC 5.3.1.1) (TIM) (Triose- phosphate isomerase).	Biological Process: metabolic process (GO:0008152), Molecular Function: catalytic activity (GO:0003824), Molecular Function: triose-phosphate isomerase activity (GO:0004807)
Os03g0286500	-0.636673	4.20182e-05			Similar to RNA-binding region containing protein 1 (HSRNASEB) (ssDNA binding protein SEB4) (CLL-associated antigen KW-5). Splice isoform 2.	Molecular Function: nucleotide binding (GO:0000166), Molecular Function: nucleic acid binding (GO:0003676)
Os01g0906000	-0.637055	0.000343495			Similar to Ceramide glucosyltransferase.	0
Os12g0109200	-0.638739	0.00142575			Similar to Ca(2+)-dependent nuclease.	0
Os06g0112100	-0.640024	8.12749e-05			Nucleoside phosphorylase, family 1 domain containing protein.	Biological Process: nucleoside metabolic process (GO:0009116), Molecular Function: catalytic activity (GO:0003824)
Os06g0541600	-0.642552	0.00764962	OsRLCK206	RECEPTOR-LIKE CYTOPLASMIC KINASE 206	Conserved hypothetical protein.	0
Os04g0674400	-0.643957	0.000279426			Similar to Anamorsin (Cytokine induced apoptosis inhibitor 1) (CUA001). Splice isoform 2.	0
Os03g0717900	-0.644055	0.00532914			Similar to ABRH7 (Fragment).	0
Os07g0462200	-0.644657	0.0064098			Protein of unknown function DUF1218 family protein.	0
Os07g0636800	-0.645821	0.00670021			Plant disease resistance response protein family protein.	0
Os05g0470000	-0.64626	0.00594153	OsTBL11, TBL11	0	Domain of unknown function DUF231, plant domain containing protein.	0
Os04g0610800	-0.649654	0.00466984			Similar to Coproporphyrinogen III oxidase (Fragment).	Biological Process: porphyrin-containing compound biosynthetic process (GO:0006779), Biological Process: oxidation-reduction process (GO:0055114), Molecular Function: coproporphyrinogen oxidase activity (GO:0004109)
Os01g0973600	-0.651272	0.000103813			Protein of unknown function DUF506, plant family protein.	0
Os06g0714800	-0.652093	5.74284e-06			Protein of unknown function DUF581 family protein.	0
Os09g0272600	-0.65304	0.00346387			Conserved hypothetical protein.	0
Os03g0113700	-0.654791	0.00473179	OsISC24	IRON-SULFUR CLUSTER PROTEIN 24	Similar to Heat shock 70 kDa protein, mitochondrial precursor.	Biological Process: protein folding (GO:0006457), Molecular Function: ATP binding (GO:0005524), Molecular Function: unfolded protein binding (GO:0051082)
Os11g0496500	-0.657296	0.000800474			Similar to AT.I.24-5 protein (Fragment).	0
Os08g0159500	-0.65787	1.42459e-08			Similar to Zinc-finger protein Lsd1.	0
Os07g0571300	-0.659286	0.00521866			Hypothetical protein.	0
Os07g0548800	-0.666661	7.00915e-05			Conserved hypothetical protein.	0
Os03g0402800	-0.67056	7.39135e-05	OsJAZ5, JAZ5, JAZ6, OsJAZ6, OsTIFY10A	TIFY-DOMAIN PROTEIN 5	Tify domain containing protein.	Molecular Function: protein binding (GO:0005515)
Os01g0810300	-0.671813	0.00158503			Similar to Calmodulin-like protein.	Molecular Function: calcium ion binding (GO:0005509)
Os09g0480600	-0.672233	0.00471575			Conserved hypothetical protein.	0
Os02g0731300	-0.672363	1.78973e-05			Non-protein coding transcript.	0
Os06g0671800	-0.676696	2.24383e-05			Similar to patellin-5.	0
Os07g0448800	-0.677092	0.00246174	OsPIP2a, PIP2-1, PIP2a, PIP2.1, OsPIP2;1, OsPIP2-1	PLASMA MEMBRANE INTRINSIC PROTEIN 2A	Aquaporin.	Biological Process: transport (GO:0006810), Biological Process: water transport (GO:0006833), Biological Process: transmembrane transport (GO:0055085), Cellular Component: membrane (GO:0016020), Cellular Component: integral to membrane (GO:0016021), Molecular Function: transporter activity (GO:0005215)
Os04g0497200	-0.679298	0.00417375	OsGLU3, OsGH9A2	_	Putative membrane-bound endo-1, 4-beta-glucanase, Synthesis of root cellulose, Modulation of root cell division and elongation	Biological Process: carbohydrate metabolic process (GO:0005975), Molecular Function: catalytic activity (GO:0003824), Molecular Function: hydrolase activity, hydrolyzing O-glycosyl compounds (GO:0004553)
Os05g0405000	-0.681536	0.000977296	flo4, flo4-2, flo4-3, ppdk, OsPPDK, PPDK1, CPDK1, PPDKB, OsPPDKB, cyOsPPDKB, OsPBDK, PBDK, osppdkb, PPD	PYRUVATE, ORTHOPHOSPHATE DIKINASE 1	Orthophosphate dikinase precursor (EC 2.7.9.1).	Biological Process: phosphorylation (GO:0016310), Molecular Function: catalytic activity (GO:0003824), Molecular Function: ATP binding (GO:0005524), Molecular Function: kinase activity (GO:0016301), Molecular Function: transferase activity, transferring phosphorus-containing groups (GO:0016772), Molecular Function: ligase activity (GO:0016874), Molecular Function: pyruvate, phosphate dikinase act…
Os06g0172600	-0.681996	0.00617094			Similar to predicted protein.	Biological Process: translation (GO:0006412), Cellular Component: intracellular (GO:0005622), Cellular Component: ribosome (GO:0005840), Molecular Function: structural constituent of ribosome (GO:0003735)
Os04g0136700	-0.684916	0.0010663	OsCBSX5	_	Cystathionine beta-synthase, core domain containing protein.	Biological Process: metabolic process (GO:0008152), Molecular Function: catalytic activity (GO:0003824), Molecular Function: protein binding (GO:0005515)
Os03g0262700	-0.686483	0.008383			Harpin-induced 1 domain containing protein.	0
Os03g0635800	-0.686632	0.00765304			Protein of unknown function DUF828, plant family protein.	0
Os01g0180800	-0.68898	0.00072399			Heat shock protein Hsp70 family protein.	Molecular Function: ATP binding (GO:0005524)
Os09g0456800	-0.689518	0.00617266	HSfB1, OsHsfB1, OsHsf-23, HSF23, OsHsf23, TBF1	HEAT STRESS TRANSCRIPTION FACTOR B1	Similar to Heat stress transcription factor Spl7 (Heat shock transcription factor) (Heat shock factor RHSF10).	Biological Process: regulation of transcription, DNA-dependent (GO:0006355), Cellular Component: nucleus (GO:0005634), Molecular Function: sequence-specific DNA binding transcription factor activity (GO:0003700), Molecular Function: sequence-specific DNA binding (GO:0043565)
Os01g0371500	-0.69341	0.00260961	OsGSTF10	PHI GLUTATHIONE S-TRANSFERASE 10	Similar to Glutathione-S-transferase 19E50.	Molecular Function: protein binding (GO:0005515)
Os11g0227000	-0.695246	0.00371329			Conserved hypothetical protein.	0
Os06g0711900	-0.696166	0.00165538	OsLTPG24, OsLTPg24, OsLtpVIII.1	0	Bifunctional inhibitor/plant lipid transfer protein/seed storage domain containing protein.	Biological Process: lipid transport (GO:0006869)
Os01g0642100	-0.697405	0.00173334			Hypothetical conserved gene.	0
Os08g0171700	-0.698444	0.0064098			Conserved hypothetical protein.	0
Os01g0834900	-0.706043	0.000190192			Hypothetical conserved gene.	0
Os02g0597300	-0.707997	0.000510893			Leucine-rich repeat domain containing protein.	Molecular Function: protein binding (GO:0005515)
Os06g0728700	-0.708984	0.00382662	0	0	Homeodomain-like containing protein.	Biological Process: regulation of transcription, DNA-dependent (GO:0006355), Molecular Function: DNA binding (GO:0003677), Molecular Function: protein binding (GO:0005515)
Os01g0803200	-0.709678	0.000273779	Oc1*, Oc1, OC-I, SPOC-I, OsCP1, Oc, OCI, OsCYS1	ORYZACYSTATIN 1	Cysteine proteinase inhibitor-I (Oryzacystatin-I).	Molecular Function: cysteine-type endopeptidase inhibitor activity (GO:0004869)
Os07g0676800	-0.711712	0.00475733			Conserved hypothetical protein.	0
Os04g0685300	-0.712929	0.00592208			Harpin-induced 1 domain containing protein.	0
Os11g0178800	-0.71471	0.0044318			Plant disease resistance response protein family protein.	0
Os09g0381600	-0.715989	0.0064098			Conserved hypothetical protein.	0
Os04g0530500	-0.719513	0.000312599	OsRDCP1	RING DOMAIN-CONTAINING PROTEIN 1	Zinc finger, RING/FYVE/PHD-type domain containing protein.	Molecular Function: protein binding (GO:0005515), Molecular Function: zinc ion binding (GO:0008270)
Os10g0469700	-0.72423	0.000670257			Leucine-rich repeat, typical subtype containing protein.	Molecular Function: protein binding (GO:0005515)
Os04g0517100	-0.72426	1.64511e-08	OsMYB4, Osmyb4, OsMyb4, OsMYB55, OsMyb8	0	Similar to OSIGBa0145M07.4 protein.	Biological Process: regulation of transcription, DNA-dependent (GO:0006355), Molecular Function: DNA binding (GO:0003677), Molecular Function: protein binding (GO:0005515)
Os09g0248100	-0.725587	0.000957076	OsFLA11	FASCICLIN-LIKE ARABINOGALACTAN PROTEIN 11	FAS1 domain domain containing protein.	0
Os02g0152400	-0.727808	0.00230697	RbcS1, OsRBCS1, OsRbcS1	0	Rubisco small subunit 1, Reguration of Rubisco catalytic activity	0
Os06g0203600	-0.729064	3.26339e-05	CHI2, OsCHI2	0	Chalcone isomerase domain containing protein.	Biological Process: cellular modified amino acid biosynthetic process (GO:0042398), Molecular Function: intramolecular lyase activity (GO:0016872)
Os01g0913100	-0.729249	0.0095316			Protein of unknown function DUF538 family protein.	0
Os05g0198200	-0.7303	0.000895365	OsGRX16	GLUTAREDOXIN 16	Thioredoxin fold domain containing protein.	Biological Process: cell redox homeostasis (GO:0045454), Molecular Function: electron carrier activity (GO:0009055), Molecular Function: protein disulfide oxidoreductase activity (GO:0015035)
Os05g0544900	-0.732206	0.0053557			Protein of unknown function DUF3615 domain containing protein.	0
Os07g0637700	-0.734778	2.4236e-06			Similar to Disease resistance-responsive family protein.	0
Os02g0197400	-0.73598	0.00646806			Similar to HrpN-interacting protein from Malus.	0
Os04g0149400	-0.739027	0.0028643			Conserved hypothetical protein.	0
Os03g0669100	-0.740782	0.00488799			Similar to predicted protein.	Biological Process: dUTP metabolic process (GO:0046080), Molecular Function: dUTP diphosphatase activity (GO:0004170), Molecular Function: hydrolase activity (GO:0016787)
Os01g0595400	-0.742032	0.00454819			Protein of unknown function DUF538 family protein.	0
Os03g0301200	-0.742589	0.00278013			COBRA-like protein 7 precursor.	0
Os01g0644600	-0.749224	0.00789195			Glutelin family protein.	0
Os10g0552800	-0.749501	0.000180568			Similar to Tfm5 protein.	Biological Process: lipid transport (GO:0006869)
Os06g0637500	-0.750016	0.00142358	R2R3-MYB	0	Similar to MYB transcription factor R2R3 type.	0
Os02g0236600	-0.752982	0.0069642	prx27	0	Peroxidase P7 (EC 1.11.1.7) (TP7).	Biological Process: response to oxidative stress (GO:0006979), Biological Process: oxidation-reduction process (GO:0055114), Molecular Function: peroxidase activity (GO:0004601), Molecular Function: heme binding (GO:0020037)
Os09g0334500	-0.759503	0.00021847	OsWRKY74	TRANSCRIPTION FACTOR WRKY74	WRKY transcription factor, Tolerance to phosphate starvation, Regulator of Fe starvation and cold stress	Biological Process: regulation of transcription, DNA-templated (GO:0006355), Molecular Function: transcription factor activity, sequence-specific DNA binding (GO:0003700), Molecular Function: sequence-specific DNA binding (GO:0043565)
Os05g0563600	-0.759589	0.00436639	OsFLA6	FASCICLIN-LIKE ARABINOGALACTAN PROTEIN 6	FAS1 domain domain containing protein.	0
Os04g0656800	-0.760776	0.00894807	prx58	0	Similar to Peroxidase precursor (EC 1.11.1.7).	Biological Process: response to oxidative stress (GO:0006979), Biological Process: oxidation-reduction process (GO:0055114), Molecular Function: peroxidase activity (GO:0004601), Molecular Function: heme binding (GO:0020037)
Os08g0321000	-0.761278	0.00183803	OsFLA3	FASCICLIN-LIKE ARABINOGALACTAN PROTEIN 3	FAS1 domain domain containing protein.	0
Os03g0429000	-0.768555	0.00594153			Proteinase inhibitor I25, cystatin domain containing protein.	Molecular Function: cysteine-type endopeptidase inhibitor activity (GO:0004869)
Os12g0623600	-0.76929	7.63673e-05			Protein of unknown function DUF1637 family protein.	Biological Process: oxidation-reduction process (GO:0055114), Molecular Function: cysteamine dioxygenase activity (GO:0047800)
Os02g0814000	-0.770153	4.65736e-05			Protein of unknown function DUF862, eukaryotic domain containing protein.	0
Os07g0590700	-0.771465	0.00144832	OsAGP13	ARABINOGALACTAN PROTEIN 13	Similar to transcriptional regulatory protein algP.	0
Os03g0121300	-0.772405	0.00911374	prx34	0	Similar to Peroxidase 1.	Biological Process: response to oxidative stress (GO:0006979), Biological Process: oxidation-reduction process (GO:0055114), Molecular Function: peroxidase activity (GO:0004601), Molecular Function: heme binding (GO:0020037)
Os04g0623500	-0.77332	0.00981965	GLO3, OsGLO3	0	Similar to H0215F08.7 protein.	Biological Process: metabolic process (GO:0008152), Biological Process: oxidation-reduction process (GO:0055114), Molecular Function: catalytic activity (GO:0003824), Molecular Function: FMN binding (GO:0010181), Molecular Function: oxidoreductase activity (GO:0016491)
Os07g0568700	-0.779004	0.00461722	OsFOR1, Osfor1	FLORAL ORGAN REGULATOR 1	Polygalacturonase-inhibiting protein, Inhibitor of fungal polygalacturonase, Regulation of floral organ number	Molecular Function: protein binding (GO:0005515)
Os07g0250900	-0.780885	0.00247193			Harpin-induced 1 domain containing protein.	0
Os01g0217000	-0.783473	0.00641055	OsTBL19, TBL19	0	Protein of unknown function DUF231, plant domain containing protein.	0
Os02g0266900	-0.790577	0.00466405			Conserved hypothetical protein.	0
Os02g0662000	-0.794158	0.00244916	RCc3, OsHyPRP01, HyP/GRP01, OsHyPRP1, HyP/GRP1, OsRcc3	0	RCc3 protein.	Biological Process: lipid transport (GO:0006869)
Os04g0586100	-0.796265	0.000516364			Protein of unknown function DUF581 family protein.	0
Os12g0582700	-0.798311	0.00880901			Similar to Cytochrome P450.	Biological Process: oxidation-reduction process (GO:0055114), Molecular Function: iron ion binding (GO:0005506), Molecular Function: electron carrier activity (GO:0009055), Molecular Function: oxidoreductase activity, acting on paired donors, with incorporation or reduction of molecular oxygen (GO:0016705), Molecular Function: heme binding (GO:0020037)
Os04g0586200	-0.80075	2.86639e-05			Similar to H0307D04.13 protein.	0
Os02g0173600	-0.801962	0.00622732			Similar to Dreg-2 like protein.	0
Os06g0292100	-0.803117	0.00937325			Hypothetical conserved gene.	0
Os08g0372900	-0.803344	0.00224387			Similar to Rhodopsin (Fragment).	0
Os08g0501900	-0.803888	0.00411331			Non-protein coding transcript.	0
Os01g0841700	-0.809845	3.64559e-06	Rpp17, FIERG1, OsERG1, OsERG1a, OsERG1b	PHLOEM PROTEIN 17	Similar to Isoform ERG1b of Elicitor-responsive protein 1.	Molecular Function: protein binding (GO:0005515)
Os08g0501500	-0.810939	0.00111192			EGF-type aspartate/asparagine hydroxylation site domain containing protein.	Biological Process: protein phosphorylation (GO:0006468), Molecular Function: protein kinase activity (GO:0004672), Molecular Function: protein serine/threonine kinase activity (GO:0004674), Molecular Function: protein tyrosine kinase activity (GO:0004713), Molecular Function: calcium ion binding (GO:0005509), Molecular Function: protein binding (GO:0005515), Molecular Function: ATP binding (GO:0…
Os04g0183500	-0.814763	0.00276439			Similar to OSIGBa0140C02.6 protein.	Molecular Function: carbon-nitrogen ligase activity, with glutamine as amido-N-donor (GO:0016884)
Os01g0214600	-0.81654	0.00273081	OsGELP2, OsGELP2a, OsGELP2b	GDSL ESTERASE/LIPASE PROTEIN 2	Lipase, GDSL domain containing protein.	Biological Process: lipid metabolic process (GO:0006629), Molecular Function: hydrolase activity, acting on ester bonds (GO:0016788)
Os01g0174100	-0.819931	0.00074866			Conserved hypothetical protein.	0
Os02g0752200	-0.820994	0.00836767			Similar to Beta-D-xylosidase.	Biological Process: carbohydrate metabolic process (GO:0005975), Molecular Function: hydrolase activity, hydrolyzing O-glycosyl compounds (GO:0004553)
Os06g0598800	-0.82114	2.02748e-07	WSL1, FAE', OsFAE1', OsCER6	BETA-KETOACYL COA SYNTHASE	Similar to Fatty acid elongase 1-like protein.	Biological Process: fatty acid biosynthetic process (GO:0006633), Biological Process: metabolic process (GO:0008152), Biological Process: lipid biosynthetic process (GO:0008610), Cellular Component: membrane (GO:0016020), Molecular Function: catalytic activity (GO:0003824), Molecular Function: transferase activity, transferring acyl groups other than amino-acyl groups (GO:0016747)
Os10g0184200	-0.824518	0.000469864			Protein of unknown function DUF594 family protein.	0
Os01g0266500	-0.826145	1.78229e-06			Phenazine biosynthesis PhzC/PhzF protein family protein.	Biological Process: biosynthetic process (GO:0009058), Molecular Function: catalytic activity (GO:0003824)
Os02g0590400	-0.826812	0.00015581			Lecithin:cholesterol acyltransferase family protein.	Biological Process: lipid metabolic process (GO:0006629), Molecular Function: O-acyltransferase activity (GO:0008374)
Os11g0689100	-0.830455	0.00606657			NB-ARC domain containing protein.	Biological Process: defense response (GO:0006952), Molecular Function: nucleotide binding (GO:0000166), Molecular Function: nucleoside-triphosphatase activity (GO:0017111), Molecular Function: ADP binding (GO:0043531)
Os04g0119500	-0.832232	5.96196e-07			Non-protein coding transcript.	0
Os09g0543900	-0.841089	0.000264152	Os-PHT3, OsPHT3	PUTRESCINE HYDROXYCINNAMOYL TRANSFERASE 3	Transferase family protein.	Molecular Function: transferase activity, transferring acyl groups other than amino-acyl groups (GO:0016747)
Os03g0186900	-0.84179	0.00905223	OsAP25, Radc1, AP25	0	Radc1.	Biological Process: proteolysis (GO:0006508), Molecular Function: aspartic-type endopeptidase activity (GO:0004190)
Os06g0668200	-0.843059	2.3688e-06	PGK, OsPGK4	PHOSPHOGLYCERATE KINASE 4	Similar to Phosphoglycerate kinase, cytosolic (EC 2.7.2.3).	Biological Process: glycolysis (GO:0006096), Molecular Function: phosphoglycerate kinase activity (GO:0004618)
Os08g0503200	-0.845083	0.00669927			PLC-like phosphodiesterase, TIM beta/alpha-barrel domain domain containing protein.	Biological Process: glycerol metabolic process (GO:0006071), Biological Process: lipid metabolic process (GO:0006629), Molecular Function: phosphoric diester hydrolase activity (GO:0008081), Molecular Function: glycerophosphodiester phosphodiesterase activity (GO:0008889)
Os05g0217000	-0.845174	0.000172076	OsAGP23	ARABINOGALACTAN PROTEIN 23	Protein of unknown function DUF1070 family protein.	0
Os03g0788600	-0.845782	0.00501267	OsFLA24	FASCICLIN-LIKE ARABINOGALACTAN PROTEIN 24	FAS1 domain domain containing protein.	0
Os08g0425000	-0.846433	0.00393458			Similar to mRNA, clone: RTFL01-05-M08.	0
Os06g0579100	-0.846556	0.00513363			Conserved hypothetical protein.	0
Os01g0847700	-0.846609	0.000267474	OsAKR2, AKR4C14	ALDO-KETO REDUCTASE 2	Aldo-keto reductase, Detoxification of reactive aldehydes, Abiotic stress tolerance	Biological Process: oxidation-reduction process (GO:0055114), Molecular Function: oxidoreductase activity (GO:0016491)
Os01g0309100	-0.853477	0.00219875			Similar to anther-specific protein SF18.	0
Os01g0668100	-0.853666	0.000453198	OsFLA7	FASCICLIN-LIKE ARABINOGALACTAN PROTEIN 7	Similar to Arabinogalactan-like protein.	0
Os02g0640300	-0.856979	7.60929e-07			Similar to Membrane steroid binding protein 1 (AtMP1).	Molecular Function: heme binding (GO:0020037)
Os11g0448700	-0.85855	0.00702368	OsRALF-31, OsRALF31, RALF-31	RAPID ALKALIZATION FACTOR 31	Conserved hypothetical protein.	0
Os02g0718600	-0.859292	0.00981965	OsAGP21	ARABINOGALACTAN PROTEIN 21	Conserved hypothetical protein.	0
Os05g0186300	-0.860981	0.00770996	OscytME2, cytME2	_	Similar to NADP-malic enzyme.	Biological Process: malate metabolic process (GO:0006108), Biological Process: oxidation-reduction process (GO:0055114), Molecular Function: nucleotide binding (GO:0000166), Molecular Function: malic enzyme activity (GO:0004470), Molecular Function: oxidoreductase activity (GO:0016491), Molecular Function: oxidoreductase activity, acting on the CH-OH group of donors, NAD or NADP as acceptor (GO:0…
Os01g0765600	-0.861872	8.26481e-05			EF-Hand type domain containing protein.	Molecular Function: calcium ion binding (GO:0005509)
Os04g0574200	-0.865646	0.00974394	OsFLA1	FASCICLIN-LIKE ARABINOGALACTAN PROTEIN 1	FAS1 domain domain containing protein.	0
Os09g0517100	-0.868324	4.27209e-05			NB-ARC domain containing protein.	Biological Process: defense response (GO:0006952), Molecular Function: ADP binding (GO:0043531)
Os09g0452900	-0.868866	0.00388021			Glycosyl transferase, family 31 protein.	Biological Process: protein glycosylation (GO:0006486), Cellular Component: membrane (GO:0016020), Molecular Function: galactosyltransferase activity (GO:0008378)
Os02g0276200	-0.86962	0.000104979			Similar to Isochorismatase family protein rutB.	Biological Process: metabolic process (GO:0008152), Molecular Function: catalytic activity (GO:0003824)
Os01g0656600	-0.87153	7.25007e-10			Conserved hypothetical protein.	0
Os08g0237000	-0.873493	0.000130196	OsXTH17, OsXTH8	XYLOGLUCAN ENDOTRANSGLUCOSYLASE/HYDROLASE 17	Xyloglucan endotransglycosylase/hydrolase protein 8 precursor (EC 2.4.1.207) (End-xyloglucan transferase) (OsXTH8) (OsXRT5).	Biological Process: carbohydrate metabolic process (GO:0005975), Biological Process: cellular glucan metabolic process (GO:0006073), Cellular Component: cell wall (GO:0005618), Cellular Component: apoplast (GO:0048046), Molecular Function: hydrolase activity, hydrolyzing O-glycosyl compounds (GO:0004553), Molecular Function: xyloglucan:xyloglucosyl transferase activity (GO:0016762)
Os05g0525900	-0.873695	0.00921267	OsC3H37, OsTZF7, OsCCCH-Zn-1	ZINC FINGER CCCH DOMAIN-CONTAINING PROTEIN 37	Similar to Zing finger transcription factor PEI1.	Molecular Function: nucleic acid binding (GO:0003676), Molecular Function: zinc ion binding (GO:0008270)
Os01g0667200	-0.875901	3.37311e-06			Mitochondrial sulfur dioxygenase, Abiotic stress response	0
Os05g0223000	-0.878165	0.00110675	OsCML18	CALMODULIN-LIKE PROTEIN 18	Similar to TCH2 (TOUCH 2); calcium ion binding.	Molecular Function: calcium ion binding (GO:0005509)
Os01g0508000	-0.881666	1.14313e-06	Os1bglu1, Os1Bglu1	BETA-GLUCOSIDASE 1	Similar to Beta-glucosidase.	Biological Process: carbohydrate metabolic process (GO:0005975), Molecular Function: catalytic activity (GO:0003824), Molecular Function: hydrolase activity, hydrolyzing O-glycosyl compounds (GO:0004553), Molecular Function: cation binding (GO:0043169)
Os01g0170000	-0.886301	0.00174736	RS5, OsRS5	0	Raffinose synthase family protein.	0
Os02g0763000	-0.890706	0.000126134	OsFWL1	0	Protein of unknown function Cys-rich family protein.	0
Os03g0764100	-0.892187	0.00316609	WZF1	0	Zinc finger transcription factor ZF1.	Cellular Component: intracellular (GO:0005622), Molecular Function: nucleic acid binding (GO:0003676), Molecular Function: zinc ion binding (GO:0008270)
Os04g0685400	-0.892469	0.00164927			Harpin-induced 1 domain containing protein.	0
Os11g0195500	-0.892734	1.84759e-07	PAD4, OsPAD4	0	Hypothetical conserved gene.	Biological Process: lipid metabolic process (GO:0006629), Molecular Function: triglyceride lipase activity (GO:0004806)
Os10g0525500	-0.893177	0.00401102	OsGSTU21	TAU GLUTATHIONE S-TRANSFERASE 21	Similar to glutathione transferase31.	Molecular Function: protein binding (GO:0005515)
Os07g0287400	-0.895558	0.00161606	OsLTPd3, OsLtpIV.3	0	Plant lipid transfer protein/seed storage/trypsin-alpha amylase inhibitor domain containing protein.	Biological Process: lipid transport (GO:0006869)
Os12g0145100	-0.896289	0.000284787			Similar to Wali7 protein (Fragment).	0
Os03g0276500	-0.90253	3.63407e-15	OsHsp71.1, OsHSP71.1, OsMED37_3, MED37_3	71.1 KDA CLASS I HEAT SHOCK PROTEIN	Similar to Heat shock protein 70.	Molecular Function: ATP binding (GO:0005524)
Os04g0514600	-0.905054	0.00122528			Similar to NBS-LRR type disease resistance protein O2 (Fragment).	Biological Process: defense response (GO:0006952), Molecular Function: ADP binding (GO:0043531)
Os03g0571900	-0.905225	0.00338924	PEZ1, OsPEZ1	0	Similar to transparent testa 12 protein.	Biological Process: drug transmembrane transport (GO:0006855), Biological Process: transmembrane transport (GO:0055085), Cellular Component: membrane (GO:0016020), Molecular Function: drug transmembrane transporter activity (GO:0015238), Molecular Function: antiporter activity (GO:0015297)
Os07g0194100	-0.907966	0.000172076			Similar to OSK2 (Fragment).	Biological Process: protein phosphorylation (GO:0006468), Molecular Function: protein kinase activity (GO:0004672), Molecular Function: protein serine/threonine kinase activity (GO:0004674), Molecular Function: ATP binding (GO:0005524), Molecular Function: transferase activity, transferring phosphorus-containing groups (GO:0016772)
Os02g0813166	-0.908069	0.00433073			Cyclin-like F-box domain containing protein.	0
Os11g0227600	-0.908725	0.00847793			Hypothetical protein.	0
Os12g0159000	-0.912093	0.00581588			Harpin-induced 1 domain containing protein.	0
Os07g0605400	-0.914325	0.000644722			Similar to EGG APPARATUS-1 protein (ZmEA1).	0
Os01g0957100	-0.91475	0.00310796			Protein kinase, core domain containing protein.	Biological Process: protein phosphorylation (GO:0006468), Molecular Function: protein kinase activity (GO:0004672), Molecular Function: protein binding (GO:0005515), Molecular Function: ATP binding (GO:0005524), Molecular Function: transferase activity, transferring phosphorus-containing groups (GO:0016772)
Os01g0347300	-0.91552	4.32726e-07			Conserved hypothetical protein.	0
Os03g0100030	-0.918882	0.000551648			CAAX amino terminal protease domain containing protein.	Cellular Component: membrane (GO:0016020)
Os01g0195400	-0.921632	0.00026416			Harpin-induced 1 domain containing protein.	0
Os03g0852400	-0.926475	0.00284314	OsAGP31	ARABINOGALACTAN PROTEIN 31	Conserved hypothetical protein.	0
Os01g0840100	-0.933466	6.42298e-11	OsMed37_1, Med37_1	0	Heat shock protein Hsp70 family protein.	Molecular Function: ATP binding (GO:0005524)
Os02g0661100	-0.933614	0.00366832	OsTPP1, OsTPS	TREHALOSE-6-PHOSPHATE PHOSPHATASE 1	Similar to Trehalose-6-phosphate phosphatase.	Biological Process: trehalose biosynthetic process (GO:0005992), Biological Process: metabolic process (GO:0008152), Molecular Function: catalytic activity (GO:0003824)
Os10g0113000	-0.935755	4.3938e-05	0	0	Similar to Chalcone reductase homologue (Fragment).	Biological Process: oxidation-reduction process (GO:0055114), Molecular Function: oxidoreductase activity (GO:0016491)
Os09g0412400	-0.936588	0.00189259			Conserved hypothetical protein.	0
Os04g0693400	-0.937414	0.00181198			Hypothetical protein.	0
Os11g0539200	-0.938672	7.23015e-07	OsXTH2, XTR1, OsXTR1	XYLOGLUCAN ENDOTRANSGLUCOSYLASE/HYDROLASE 2	Similar to Xyloglucan endotransglycosylase XET2 (Fragment).	Biological Process: carbohydrate metabolic process (GO:0005975), Biological Process: cellular glucan metabolic process (GO:0006073), Cellular Component: cell wall (GO:0005618), Cellular Component: apoplast (GO:0048046), Molecular Function: hydrolase activity, hydrolyzing O-glycosyl compounds (GO:0004553), Molecular Function: xyloglucan:xyloglucosyl transferase activity (GO:0016762)
Os07g0561300	-0.939386	0.00218006	OsFbox396, Os_F0578, OsMsr9	0	Cyclin-like F-box domain containing protein.	Molecular Function: protein binding (GO:0005515)
Os06g0198500	-0.942234	0.000769981			RmlC-like jelly roll fold domain containing protein.	0
Os07g0105000	-0.948971	0.00387713	OsUCL20	UCLACYANIN-LIKE PROTEIN 20	Cupredoxin domain containing protein.	Molecular Function: copper ion binding (GO:0005507), Molecular Function: electron carrier activity (GO:0009055)
Os01g0802700	-0.950369	0.000371861	OsPIN9	PIN PROTEIN 9	Auxin efflux carrier domain containing protein.	Biological Process: transmembrane transport (GO:0055085), Cellular Component: integral to membrane (GO:0016021)
Os02g0227600	-0.950469	0.00406689			Leucine-rich repeat domain containing protein.	Molecular Function: protein binding (GO:0005515)
Os06g0701700	-0.953215	0.00949353	OsHKT1, OsHKT2;1, Ni (Nipponbare)-OsHKT1, Po (Pokkali)-HKT1, OsHKT1;1	HIGH-AFFINITY K+ TRANSPORTER 1	Ion transporter , Na+/K+ symport	Biological Process: cation transport (GO:0006812), Biological Process: transmembrane transport (GO:0055085), Molecular Function: cation transmembrane transporter activity (GO:0008324)
Os12g0129350	-0.953289	0.00593644			Similar to Arabinoxylan arabinofuranohydrolase isoenzyme AXAH-I.	Biological Process: L-arabinose metabolic process (GO:0046373), Molecular Function: alpha-N-arabinofuranosidase activity (GO:0046556)
Os02g0111600	-0.95518	6.42713e-05	OsWAK11	WALL-ASSOCIATED KINASE 11	Serine/threonine protein kinase-related domain containing protein.	Biological Process: protein phosphorylation (GO:0006468), Molecular Function: protein kinase activity (GO:0004672), Molecular Function: protein serine/threonine kinase activity (GO:0004674), Molecular Function: calcium ion binding (GO:0005509), Molecular Function: protein binding (GO:0005515), Molecular Function: ATP binding (GO:0005524), Molecular Function: transferase activity, transferring pho…
Os02g0623300	-0.959891	0.00315288	ONAC051, ONAC51	NAC DOMAIN-CONTAINING PROTEIN 51	Conserved hypothetical protein.	0
Os09g0358000	-0.960805	0.00135395			Similar to OsD305.	Biological Process: protein phosphorylation (GO:0006468), Molecular Function: protein kinase activity (GO:0004672), Molecular Function: ATP binding (GO:0005524), Molecular Function: transferase activity, transferring phosphorus-containing groups (GO:0016772)
Os03g0822400	-0.962441	0.00464276			Conserved hypothetical protein.	0
Os05g0489750	-0.965854	0.00888147			Hypothetical protein.	0
Os11g0694100	-0.968576	0.00239568	OsWAK123	WALL-ASSOCIATED KINASE 123	Similar to Protein kinase domain containing protein, expressed.	Biological Process: protein phosphorylation (GO:0006468), Molecular Function: protein kinase activity (GO:0004672), Molecular Function: protein serine/threonine kinase activity (GO:0004674), Molecular Function: calcium ion binding (GO:0005509), Molecular Function: protein binding (GO:0005515), Molecular Function: ATP binding (GO:0005524), Molecular Function: transferase activity, transferring pho…
Os03g0107700	-0.968614	0.00594153	Orysa; EL2	D-TYPE CYCLIN-INTERACTING PROTEIN	Similar to EL2 protein.	0
Os06g0318800	-0.969721	0.00297083	OsAGP24	ARABINOGALACTAN PROTEIN 24	Non-protein coding transcript.	0
Os06g0698500	-0.971466	0.00104623			Protein of unknown function DUF1336 domain containing protein.	0
Os03g0188500	-0.972113	0.00417967	OsAGP3	ARABINOGALACTAN PROTEIN 3	Glutelin family protein.	0
Os01g0159200	-0.974346	0.00257143	OsFLA8	FASCICLIN-LIKE ARABINOGALACTAN PROTEIN 8	Similar to Fasciclin-like protein FLA18.	0
Os05g0183100	-0.984684	1.18846e-05	OsWRKY67	TRANSCRIPTION FACTOR WRKY67	Similar to WRKY transcription factor 16 (Fragment).	Biological Process: regulation of transcription, DNA-dependent (GO:0006355), Molecular Function: sequence-specific DNA binding transcription factor activity (GO:0003700), Molecular Function: sequence-specific DNA binding (GO:0043565)
Os01g0194600	-0.985833	0.000791978	OsGRX2	GLUTAREDOXIN 2	Thioredoxin fold domain containing protein.	Biological Process: cell redox homeostasis (GO:0045454), Molecular Function: electron carrier activity (GO:0009055), Molecular Function: protein disulfide oxidoreductase activity (GO:0015035)
Os07g0569100	-0.99014	0.00181198	OsREM4.1	REMORIN 4.1	Remorin protein, Coordination of interlink between abscisic acid (ABA) and brassinosteroid (BR) signaling	0
Os02g0532900	-0.990597	8.54183e-06			Glycoside hydrolase, family 17 protein.	Biological Process: carbohydrate metabolic process (GO:0005975), Molecular Function: catalytic activity (GO:0003824), Molecular Function: hydrolase activity, hydrolyzing O-glycosyl compounds (GO:0004553), Molecular Function: cation binding (GO:0043169)
Os02g0791400	-0.992173	0.00672043			Cytochrome c oxidase, subunit VIb domain containing protein.	Cellular Component: mitochondrion (GO:0005739), Molecular Function: cytochrome-c oxidase activity (GO:0004129)
Os03g0180900	-0.995481	0.00319747	OsJAZ2, JAZ2, OsJAZ 11, OsJAZ11, Os-JAZ11, JAZ11, OsTIFY11c	TIFY-DOMAIN PROTEIN 11C	Tify domain containing protein.	Molecular Function: protein binding (GO:0005515)
Os12g0260500	-0.996127	0.00453824			Similar to Oxidoreductase, short chain dehydrogenase/reductase family protein, expressed.	Biological Process: metabolic process (GO:0008152), Molecular Function: nucleotide binding (GO:0000166), Molecular Function: oxidoreductase activity (GO:0016491)
Os10g0530900	-0.996335	0.00861438	OsGSTU50	TAU GLUTATHIONE S-TRANSFERASE 50	Similar to Glutathione S-transferase GST 30 (EC 2.5.1.18).	Molecular Function: protein binding (GO:0005515)
Os01g0837000	-1.00219	2.64629e-05	OsNPR4, NPR4	0	Ankyrin repeat containing protein.	Molecular Function: protein binding (GO:0005515)
Os06g0255900	-1.00781	0.00981965	OsEXO70F5, OsExo70F5, OrysaF5_Exo70	EXOCYST SUBUNIT EXO70 FAMILY PROTEIN F5	Conserved hypothetical protein.	0
Os02g0321600	-1.00811	0.00578721			Conserved hypothetical protein.	0
Os03g0283200	-1.01293	5.25297e-09			Similar to IN2-1 protein.	Molecular Function: protein binding (GO:0005515)
Os01g0511000	-1.01657	1.2905e-06			Similar to LOB domain protein 40.	0
Os02g0687200	-1.02081	0.00173757			Protein of unknown function DUF581 family protein.	0
Os08g0531300	-1.0213	0.00159478			DHBP synthase RibB-like alpha/beta domain domain containing protein.	0
Os03g0405500	-1.02316	1.32404e-08			Similar to PDI-like protein.	Biological Process: cell redox homeostasis (GO:0045454), Biological Process: oxidation-reduction process (GO:0055114), Molecular Function: antioxidant activity (GO:0016209), Molecular Function: oxidoreductase activity (GO:0016491), Molecular Function: protein-disulfide reductase activity (GO:0047134)
Os11g0160000	-1.02375	0.00032175			Protein of unknown function DUF241, plant domain containing protein.	0
Os07g0539100	-1.02449	6.15857e-09	Gns11	0	Glycoside hydrolase, family 17 protein.	Biological Process: carbohydrate metabolic process (GO:0005975), Molecular Function: catalytic activity (GO:0003824), Molecular Function: hydrolase activity, hydrolyzing O-glycosyl compounds (GO:0004553), Molecular Function: cation binding (GO:0043169)
Os06g0546500	-1.02879	0.000870504	prx88	0	Similar to Class III peroxidase GvPx2b (Fragment).	Biological Process: response to oxidative stress (GO:0006979), Biological Process: oxidation-reduction process (GO:0055114), Molecular Function: peroxidase activity (GO:0004601), Molecular Function: heme binding (GO:0020037)
Os05g0247100	-1.02921	4.30967e-05	DIP3, XIP, OsHI-XIP	0	Similar to Glycosyl hydrolases family 18.	Biological Process: carbohydrate metabolic process (GO:0005975), Molecular Function: catalytic activity (GO:0003824), Molecular Function: cation binding (GO:0043169)
Os10g0552700	-1.02946	0.00482513			Similar to Tumor-related protein (Fragment).	Biological Process: lipid transport (GO:0006869)
Os02g0712500	-1.03149	0.000170394			Protein of unknown function DUF23 family protein.	0
Os12g0556200	-1.03472	9.89106e-06			Calmodulin binding protein-like family protein.	0
Os03g0182800	-1.03791	4.0331e-06	OsEBP-89, ebp-89, OsERF#060, OsERF060, OsERF60, ERF60, AP2/EREBP#027, AP2/EREBP27, OsEBP89	EREBP TRANSCRIPTION FACTOR	Similar to Ethylene responsive element binding factor3 (OsERF3).	Biological Process: regulation of transcription, DNA-dependent (GO:0006355), Molecular Function: DNA binding (GO:0003677), Molecular Function: sequence-specific DNA binding transcription factor activity (GO:0003700)
Os03g0234900	-1.03997	0.00116323	prx39	0	Similar to Peroxidase (EC 1.11.1.7).	0
Os10g0450400	-1.04507	1.70739e-05			Protein of unknown function DUF594 family protein.	0
Os01g0542000	-1.04608	0.0074488			Similar to DNA-damage-repair/toleration protein DRT102.	Biological Process: carbohydrate metabolic process (GO:0005975)
Os01g0847100	-1.04629	0.00216729			Conserved hypothetical protein.	0
Os03g0285200	-1.05159	0.000126134			Conserved hypothetical protein.	0
Os03g0152000	-1.05426	0.000260413			Heavy metal transport/detoxification protein domain containing protein.	Biological Process: metal ion transport (GO:0030001), Molecular Function: metal ion binding (GO:0046872)
Os02g0757100	-1.06986	0.00788397	OsPHI-1	0	Similar to Phi-1 protein.	0
Os08g0124500	-1.07243	4.34971e-06			Similar to Resistance protein candidate (Fragment).	Biological Process: protein phosphorylation (GO:0006468), Molecular Function: protein kinase activity (GO:0004672), Molecular Function: protein serine/threonine kinase activity (GO:0004674), Molecular Function: binding (GO:0005488), Molecular Function: ATP binding (GO:0005524), Molecular Function: sugar binding (GO:0005529), Molecular Function: transferase activity, transferring phosphorus-contai…
Os02g0681200	-1.08566	0.00151431			Zinc finger, RING/FYVE/PHD-type domain containing protein.	Molecular Function: protein binding (GO:0005515), Molecular Function: zinc ion binding (GO:0008270)
Os10g0536450	-1.08586	2.89298e-09			Hypothetical protein.	0
Os03g0405900	-1.08868	6.78544e-12			Hypothetical conserved gene.	Biological Process: cell redox homeostasis (GO:0045454), Biological Process: oxidation-reduction process (GO:0055114), Molecular Function: antioxidant activity (GO:0016209), Molecular Function: oxidoreductase activity (GO:0016491), Molecular Function: protein-disulfide reductase activity (GO:0047134)
Os01g0216000	-1.0918	0.00161724	OsGELP7	GDSL ESTERASE/LIPASE PROTEIN 7	Lipase, GDSL domain containing protein.	Biological Process: lipid metabolic process (GO:0006629), Molecular Function: hydrolase activity, acting on ester bonds (GO:0016788)
Os12g0472800	-1.09542	0.000880868			B repeat unit of collagen binding surface protein (cna) containing protein.	0
Os06g0247900	-1.0991	0.00349523	OsGH9B9	_	Similar to Endo-beta-1, 4-glucanase precursor (EC 3.2.1.4).	Biological Process: carbohydrate metabolic process (GO:0005975), Molecular Function: catalytic activity (GO:0003824), Molecular Function: hydrolase activity, hydrolyzing O-glycosyl compounds (GO:0004553)
Os03g0374500	-1.10774	0.00738765			Similar to calmodulin-binding family protein.	Molecular Function: protein binding (GO:0005515)
Os01g0508300	-1.11575	0.000266329			Conserved hypothetical protein.	0
Os07g0251200	-1.11873	9.01138e-05			Conserved hypothetical protein.	0
Os01g0764800	-1.12043	0.00224387	OsGH3-2, OsGH3.2, GH3.2	0	Indole-3-acetic acid (IAA)-amido synthetase, Disease resistance, Abiotic stress tolerance	0
Os11g0540800	-1.12143	0.00316609			Protein of unknown function DUF247, plant domain containing protein.	0
Os10g0116800	-1.12253	0.000341255	OsPAP3b	PURPLE ACID PHOSPHATASE 3B	Similar to Purple acid phosphatase.	Molecular Function: hydrolase activity (GO:0016787)
Os05g0562300	-1.12371	0.000105126	OsDjB7	0	Similar to DnaJ-like protein.	Biological Process: protein folding (GO:0006457), Molecular Function: heat shock protein binding (GO:0031072), Molecular Function: unfolded protein binding (GO:0051082)
Os04g0667600	-1.124	5.14732e-06			Heavy metal transport/detoxification protein domain containing protein.	0
Os05g0161800	-1.12905	0.00388064	OsCRSH3	Ca2+-ACTIVATED RELA-SPOT HOMOLOG 3	RelA/SpoT domain containing protein.	Biological Process: guanosine tetraphosphate metabolic process (GO:0015969), Molecular Function: calcium ion binding (GO:0005509)
Os02g0277700	-1.12933	0.000448623			Leucine-rich repeat domain containing protein.	Molecular Function: protein binding (GO:0005515)
Os05g0578600	-1.13098	0.000433068			Similar to Polygalacturonase PG2.	Biological Process: carbohydrate metabolic process (GO:0005975), Molecular Function: polygalacturonase activity (GO:0004650)
Os10g0536400	-1.13677	6.99044e-09	OsF3H-2, F3H-2, OsF3H2	FLAVANONE 3-HYDROXYLASE 2	Similar to Oxidoreductase, 2OG-Fe oxygenase family protein, expressed.	0
Os02g0653000	-1.13939	2.41035e-08			Non-protein coding transcript.	0
Os10g0576600	-1.14477	0.00558565			Tetratricopeptide-like helical domain containing protein.	Molecular Function: binding (GO:0005488), Molecular Function: protein binding (GO:0005515)
Os11g0159900	-1.14851	2.21134e-05			Protein of unknown function DUF241, plant domain containing protein.	0
Os07g0532800	-1.14862	0.000733173			Peptidase A1 domain containing protein.	Biological Process: proteolysis (GO:0006508), Molecular Function: aspartic-type endopeptidase activity (GO:0004190)
Os06g0268600	-1.15769	4.53763e-08			Non-protein coding transcript.	0
Os06g0586000	-1.16149	0.00136097			Conserved hypothetical protein.	0
Os01g0121500	-1.16831	0.00581764			Conserved hypothetical protein.	0
Os02g0818900	-1.16846	0.00793552			Heavy metal transport/detoxification protein domain containing protein.	0
Os06g0696400	-1.17117	2.55297e-07	OsXTH11, XTR2, OsXTR2, Meri-5	XYLOGLUCAN ENDOTRANSGLUCOSYLASE/HYDROLASE 11	Xyloglycan endo-transglycosylase precursor.	Biological Process: carbohydrate metabolic process (GO:0005975), Biological Process: cellular glucan metabolic process (GO:0006073), Cellular Component: cell wall (GO:0005618), Cellular Component: apoplast (GO:0048046), Molecular Function: hydrolase activity, hydrolyzing O-glycosyl compounds (GO:0004553), Molecular Function: xyloglucan:xyloglucosyl transferase activity (GO:0016762)
Os04g0447700	-1.17235	2.02722e-05			Similar to Polyketide reductase.	Biological Process: oxidation-reduction process (GO:0055114), Molecular Function: oxidoreductase activity (GO:0016491)
Os10g0112100	-1.17346	3.98267e-06	OsFWL5, OsPcr1, PCR1, OsPCR1	0	Member of the PLAC8 domain-containing protein family, Maintenance of metal ion homeostasis and grain weight, Negative regulation of plant height	0
Os03g0803500	-1.17378	0.000206868			Similar to Prolyl 4-hydroxylase alpha-1 subunit-like protein.	Biological Process: oxidation-reduction process (GO:0055114), Molecular Function: iron ion binding (GO:0005506), Molecular Function: oxidoreductase activity (GO:0016491), Molecular Function: oxidoreductase activity, acting on paired donors, with incorporation or reduction of molecular oxygen (GO:0016705), Molecular Function: oxidoreductase activity, acting on paired donors, with incorporation or …
Os01g0795400	-1.17447	0.0062285	Hwi2, OsSub9, SUB9	0	Similar to Subtilase.	Biological Process: proteolysis (GO:0006508), Biological Process: negative regulation of catalytic activity (GO:0043086), Molecular Function: serine-type endopeptidase activity (GO:0004252), Molecular Function: identical protein binding (GO:0042802)
Os02g0694100	-1.17525	0.000118859	OsFbox106, Os_F0496	0	Cyclin-like F-box domain containing protein.	Molecular Function: protein binding (GO:0005515)
Os04g0475600	-1.17975	0.00872781			2OG-Fe(II) oxygenase domain containing protein.	Biological Process: oxidation-reduction process (GO:0055114), Molecular Function: oxidoreductase activity (GO:0016491), Molecular Function: oxidoreductase activity, acting on paired donors, with incorporation or reduction of molecular oxygen, 2-oxoglutarate as one donor, and incorporation of one atom each of oxygen into both donors (GO:0016706)
Os02g0799700	-1.18379	0.00247193			Similar to serine-rich protein.	0
Os07g0241500	-1.18416	0.00242349			UDP-glucuronosyl/UDP-glucosyltransferase family protein.	Biological Process: metabolic process (GO:0008152), Molecular Function: transferase activity, transferring hexosyl groups (GO:0016758)
Os05g0179300	-1.18423	0.000230225	OsAT7, OsAt7	ACYLTRANSFERASE 7	Transferase family protein.	Molecular Function: transferase activity, transferring acyl groups other than amino-acyl groups (GO:0016747)
Os07g0148200	-1.1954	0.0043521			Similar to Flavonol 3-O-glucosyltransferase (EC 2.4.1.91) (UDP-glucose flavonoid 3-O-glucosyltransferase) (Bronze-1) (Bz-McC allele).	Biological Process: metabolic process (GO:0008152), Molecular Function: transferase activity, transferring hexosyl groups (GO:0016758)
Os09g0426500	-1.20153	1.97128e-06	OsUMAMIT14	USUALLY MULTIPLE ACIDS MOVE IN AND OUT TRANSPORTER 14	Similar to Integral membrane protein DUF6 containing protein.	Cellular Component: membrane (GO:0016020)
Os03g0285300	-1.20313	0.00899716			Conserved hypothetical protein.	0
Os03g0236200	-1.20508	4.9642e-06	OsGAD3	GLUTAMATE DECARBOXYLASE	Similar to Glutamate decarboxylase isozyme 3 (EC 4.1.1.15).	Biological Process: glutamate metabolic process (GO:0006536), Biological Process: carboxylic acid metabolic process (GO:0019752), Molecular Function: catalytic activity (GO:0003824), Molecular Function: glutamate decarboxylase activity (GO:0004351), Molecular Function: carboxy-lyase activity (GO:0016831), Molecular Function: pyridoxal phosphate binding (GO:0030170)
Os06g0293500	-1.20822	4.08258e-05			Conserved hypothetical protein.	0
Os10g0552600	-1.21254	0.00285752			Similar to Tfm5 protein.	Biological Process: lipid transport (GO:0006869)
Os01g0138500	-1.22361	0.00246174			Protein of unknown function DUF789 family protein.	0
Os09g0441400	-1.23044	9.88082e-05			Similar to Elicitor-inducible cytochrome P450.	Biological Process: oxidation-reduction process (GO:0055114), Molecular Function: iron ion binding (GO:0005506), Molecular Function: electron carrier activity (GO:0009055), Molecular Function: oxidoreductase activity, acting on paired donors, with incorporation or reduction of molecular oxygen (GO:0016705), Molecular Function: heme binding (GO:0020037)
Os03g0172100	-1.23798	2.57279e-08			Similar to Leucine zipper protein.	0
Os06g0125200	-1.23812	4.07179e-10			Protein of unknown function DUF581 family protein.	0
Os04g0578000	-1.23906	0.000335328	OsACS2, Os-ACS2	1-AMINOCYCLOPROPANE-1-CARBOXYLATE SYNTHASE 2	ACC synthase, Ethylene biosynthesis	Biological Process: biosynthetic process (GO:0009058), Molecular Function: catalytic activity (GO:0003824), Molecular Function: pyridoxal phosphate binding (GO:0030170)
Os04g0369000	-1.24392	0.00125531			PapD-like domain containing protein.	Molecular Function: structural molecule activity (GO:0005198)
Os04g0249600	-1.2443	1.56057e-06	OsStr6, OsRhST, RLD, OsHAC1;2, HAC1;2	SULFURTRANSFERASE 6	Similar to senescence-associated protein DIN1.	0
Os09g0555100	-1.25119	0.00454819			Similar to auxin Efflux Carrier family protein.	Biological Process: transmembrane transport (GO:0055085), Cellular Component: integral to membrane (GO:0016021)
Os12g0464400	-1.25718	2.98323e-05	OsEnS-150, OsDR, DR	0	Similar to Oxidoreductase, short chain dehydrogenase/reductase family protein, expressed.	Biological Process: metabolic process (GO:0008152), Molecular Function: nucleotide binding (GO:0000166), Molecular Function: oxidoreductase activity (GO:0016491)
Os08g0544400	-1.25883	0.000907821	OsABCG45, OsPDR1, FCO1	PLEIOTROPIC DRUG RESISTANCE 1	ABC-2 type transporter domain containing protein.	Cellular Component: membrane (GO:0016020), Molecular Function: ATP binding (GO:0005524), Molecular Function: ATPase activity (GO:0016887)
Os06g0683700	-1.26038	3.56062e-09			Similar to wound induced protein.	0
Os11g0670900	-1.2632	0.00312918			Conserved hypothetical protein.	0
Os07g0668500	-1.26934	7.16841e-05			Protein kinase, catalytic domain domain containing protein.	Biological Process: protein phosphorylation (GO:0006468), Molecular Function: protein kinase activity (GO:0004672), Molecular Function: ATP binding (GO:0005524), Molecular Function: transferase activity, transferring phosphorus-containing groups (GO:0016772)
Os05g0582600	-1.27236	0.00825487	OsSCP30	SERINE CARBOXYPEPTIDASE 30	Peptidase S10, serine carboxypeptidase family protein.	Biological Process: proteolysis (GO:0006508), Molecular Function: serine-type carboxypeptidase activity (GO:0004185)
Os04g0268700	-1.27734	2.22609e-14			Eggshell protein family protein.	0
Os07g0448400	-1.28655	0.00238184	OsPIP2;5, PIP2-5	PLASMA MEMBRANE INTRINSIC PROTEIN 2;5	Similar to Aquaporin PIP2-5.	Biological Process: transport (GO:0006810), Cellular Component: membrane (GO:0016020), Molecular Function: transporter activity (GO:0005215)
Os03g0815100	-1.28713	5.91372e-06	SNAC1, snac1, OsNAC9, ONAC002, ONAC2, ONAC033, ONAC33, ONAC043, ONAC43, ONAC044, ONAC44, OsNAC19, NAC19, SNAC1/ONAC002, OsSNAC1	_	Similar to OsNAC6 protein.	Biological Process: regulation of transcription, DNA-dependent (GO:0006355), Molecular Function: DNA binding (GO:0003677)
Os09g0526700	-1.2891	7.83459e-06	OsUGE3	0	Similar to UDP-glucose 4-epimerase (EC 5.1.3.2) (Galactowaldenase) (UDP-galactose 4-epimerase).	Biological Process: galactose metabolic process (GO:0006012), Biological Process: cellular metabolic process (GO:0044237), Molecular Function: nucleotide binding (GO:0000166), Molecular Function: catalytic activity (GO:0003824), Molecular Function: UDP-glucose 4-epimerase activity (GO:0003978), Molecular Function: coenzyme binding (GO:0050662)
Os10g0147200	-1.28912	0.00736283			Similar to Thaumatin-like protein.	0
Os01g0185500	-1.29131	1.61045e-08			Protein of unknown function DUF1637 domain containing protein.	Biological Process: oxidation-reduction process (GO:0055114), Molecular Function: cysteamine dioxygenase activity (GO:0047800)
Os08g0101800	-1.29378	7.87592e-05			Protein of unknown function DUF821, CAP10-like family protein.	0
Os06g0606700	-1.30452	0.000814049			Tetratricopeptide-like helical domain containing protein.	Molecular Function: binding (GO:0005488), Molecular Function: protein binding (GO:0005515)
Os05g0552800	-1.30672	0.00138919			Conserved hypothetical protein.	0
Os01g0631800	-1.31082	0.00574533			Conserved hypothetical protein.	0
Os01g0687400	-1.32168	0.00228063	0	0	Similar to Chitinase (EC 3.2.1.14).	Biological Process: carbohydrate metabolic process (GO:0005975), Molecular Function: catalytic activity (GO:0003824), Molecular Function: hydrolase activity, hydrolyzing O-glycosyl compounds (GO:0004553), Molecular Function: cation binding (GO:0043169)
Os06g0591400	-1.32298	0.000213469			Conserved hypothetical protein.	0
Os12g0431100	-1.32797	0.00112608			ATPase, AAA-type, core domain containing protein.	Molecular Function: nucleotide binding (GO:0000166), Molecular Function: ATP binding (GO:0005524), Molecular Function: nucleoside-triphosphatase activity (GO:0017111)
Os10g0563800	-1.33042	0.00319747			Hypothetical conserved gene.	0
Os01g0826400	-1.34422	0.00858799	OsWRKY24	TRANSCRIPTION FACTOR WRKY24	WRKY transcription factor 24 (WRKY24).	Biological Process: regulation of transcription, DNA-dependent (GO:0006355), Molecular Function: sequence-specific DNA binding transcription factor activity (GO:0003700), Molecular Function: sequence-specific DNA binding (GO:0043565)
Os01g0825800	-1.34466	0.00218363	OsATL7	0	Amino acid transporter, transmembrane domain containing protein.	0
Os06g0683400	-1.35333	1.9818e-08	OsCCD1, CCD1	0	Small calcium-binding protein with one EF-hand motif, Positive regulation of osmotic and salt tolerance	Molecular Function: calcium ion binding (GO:0005509)
Os09g0517200	-1.35631	8.05737e-05			Hypothetical conserved gene.	Biological Process: defense response (GO:0006952), Molecular Function: ADP binding (GO:0043531)
Os07g0153000	-1.36046	0.00153492	OsJAZ 2, OsJAZ2, JAZ2, OsTIFY5, OsSTA188	TIFY DOMAIN PROTEIN 5	Tify domain containing protein.	0
Os07g0129200	-1.36347	0.000575579	OsPR1a, OsPR-1a, PR1a, OsPR1#074, OsPR1-74, PR-1a, OsSCP, SCP, OsPR1	PATHOGENESIS-RELATED PROTEIN 1A	Pathogenesis-related 1a protein, Regulation of abiotic stress responses	Cellular Component: extracellular region (GO:0005576)
Os02g0314600	-1.37155	0.00137152			Peptidase A1 domain containing protein.	Biological Process: proteolysis (GO:0006508), Molecular Function: aspartic-type endopeptidase activity (GO:0004190)
Os09g0526600	-1.37578	0.00268753	HSfB2c, OsHsfB2c, OsHsf-24, HSF24, OsHSF24	HEAT STRESS TRANSCRIPTION FACTOR B2c	Similar to Isoform 2 of Heat stress transcription factor B-2c.	Biological Process: regulation of transcription, DNA-dependent (GO:0006355), Cellular Component: nucleus (GO:0005634), Molecular Function: sequence-specific DNA binding transcription factor activity (GO:0003700), Molecular Function: sequence-specific DNA binding (GO:0043565)
Os05g0537100	-1.37752	0.00116519	OsWRKY7	TRANSCRIPTION FACTOR WRKY7	WRKY transcription factor 10.	Biological Process: regulation of transcription, DNA-dependent (GO:0006355), Molecular Function: sequence-specific DNA binding transcription factor activity (GO:0003700), Molecular Function: sequence-specific DNA binding (GO:0043565)
Os03g0850400	-1.38421	7.61085e-12			Similar to Aspartokinase.	Biological Process: metabolic process (GO:0008152), Biological Process: cellular amino acid biosynthetic process (GO:0008652), Molecular Function: aspartate kinase activity (GO:0004072), Molecular Function: amino acid binding (GO:0016597)
Os07g0448200	-1.38489	0.00278061	OsPIP2;9, PIP2.9, PIP2-9	PLASMA MEMBRANE INTRINSIC PROTEIN 2;9	Similar to cDNA clone:J023132K03, full insert sequence.	Biological Process: transport (GO:0006810), Biological Process: water transport (GO:0006833), Biological Process: transmembrane transport (GO:0055085), Cellular Component: membrane (GO:0016020), Cellular Component: integral to membrane (GO:0016021), Molecular Function: transporter activity (GO:0005215)
Os04g0610400	-1.39163	0.00188796	OsAP2-39, OsERF#077, OsERF077, OsERF77, AP2/EREBP#149, AP2/EREBP149	ETHYLENE RESPONSE FACTOR 77	APETALA-2-like transcription Factor, Control of the abscisic acid (ABA)/gibberellin (GA) balance	Biological Process: regulation of transcription, DNA-templated (GO:0006355), Molecular Function: DNA binding (GO:0003677), Molecular Function: transcription factor activity, sequence-specific DNA binding (GO:0003700)
Os03g0724500	-1.39327	9.17465e-08			Conserved hypothetical protein.	0
Os06g0147400	-1.40501	0.00594153			Conserved hypothetical protein.	0
Os10g0521900	-1.41026	6.54079e-07	OsRhmbd17, RHMBD17	0	Similar to Membrane protein.	Biological Process: proteolysis (GO:0006508), Cellular Component: integral to membrane (GO:0016021), Molecular Function: serine-type endopeptidase activity (GO:0004252)
Os04g0412300	-1.41851	6.83138e-05			Similar to H0717B12.10 protein.	Biological Process: carbohydrate metabolic process (GO:0005975), Molecular Function: catalytic activity (GO:0003824), Molecular Function: hydrolase activity, hydrolyzing O-glycosyl compounds (GO:0004553), Molecular Function: cation binding (GO:0043169)
Os02g0651900	-1.41932	4.7241e-07			Hypothetical protein.	0
Os05g0322900	-1.42372	8.86841e-08	OsWRKY45	TRANSCRIPTION FACTOR WRKY45	WRKY transcription factor, Benzothiadiazole (BTH)-inducible blast resistance	Biological Process: regulation of transcription, DNA-templated (GO:0006355), Molecular Function: sequence-specific DNA binding transcription factor activity (GO:0003700), Molecular Function: sequence-specific DNA binding (GO:0043565)
Os07g0516300	-1.4253	0.000135591	OsS40-15		Protein of unknown function DUF584 family protein.	0
Os01g0878400	-1.42822	0.00347314	OsAAP10C, AAP10C, OsAAP5, AAP5	0	Amino acid transporter, transmembrane domain containing protein.	0
Os05g0478700	-1.43254	0.00318247	OsWRKY84	TRANSCRIPTION FACTOR WRKY	Hypothetical conserved gene.	Biological Process: regulation of transcription, DNA-dependent (GO:0006355), Molecular Function: sequence-specific DNA binding transcription factor activity (GO:0003700), Molecular Function: sequence-specific DNA binding (GO:0043565)
Os01g0783700	-1.43416	0.000644523			Similar to EF-hand Ca2+-binding protein CCD1.	Molecular Function: calcium ion binding (GO:0005509)
Os02g0654700	-1.43539	0.00671584	OsERF#091, OsERF091, OsERF91, AP59, OsAP59, AP2/EREBP#147, AP2/EREBP147, OsBIERF3, BIERF3	ETHYLENE-RESPONSIVE ELEMENT-BINDING FACTOR 91	AP2/ERF family protein, Abiotic stress response	0
Os09g0455300	-1.43838	0.000152577	OsbHLH120, bHLH120	0	Similar to INDEHISCENT protein.	0
Os08g0189500	-1.44027	0.000102866	OsGLP8-6	GERMIN-LIKE PROTEIN 8-6	Germin-like protein 8-6, Disease resistance	Cellular Component: apoplast (GO:0048046), Molecular Function: manganese ion binding (GO:0030145), Molecular Function: nutrient reservoir activity (GO:0045735)
Os01g0955100	-1.44312	3.04482e-05	OsCML31, OsMSR2, MSR2	CALMODULIN-LIKE PROTEIN 31	Similar to Calmodulin-like protein (Fragment).	Molecular Function: calcium ion binding (GO:0005509)
Os03g0369000	-1.44616	0.00124227	prx46	0	Similar to Peroxidase 1.	Biological Process: response to oxidative stress (GO:0006979), Biological Process: oxidation-reduction process (GO:0055114), Molecular Function: peroxidase activity (GO:0004601), Molecular Function: heme binding (GO:0020037)
Os05g0158600	-1.44716	3.62908e-06	OsGA2ox1, ga2ox-1, OsGA2ox-1, ga2ox, ga2ox 1, GA2ox1	GIBBERELLIN 2-OXIDASE 1	Similar to OsGA2ox1.	0
Os01g0713200	-1.44956	6.75942e-05	Gns10	0	Similar to Beta-glucanase.	Biological Process: carbohydrate metabolic process (GO:0005975), Molecular Function: catalytic activity (GO:0003824), Molecular Function: hydrolase activity, hydrolyzing O-glycosyl compounds (GO:0004553), Molecular Function: cation binding (GO:0043169)
Os01g0269550	-1.45695	0.00684295			Hypothetical protein.	0
Os02g0215200	-1.47783	2.86209e-07	OsHDAC2, HDA710	CLASS-1 TYPE HISTONE DEACETYLASE 2	Class-I type histone deacetylase, Vegetative growth	Biological Process: histone deacetylation (GO:0016575), Molecular Function: histone deacetylase activity (GO:0004407)
Os05g0361700	-1.47904	0.00181198	OsERF#061, OsERF061, OsERF61, AP2/EREBP#093, AP2/EREBP93	ETHYLENE RESPONSE FACTOR 61	Similar to EREBP-2 protein (Fragment).	Biological Process: regulation of transcription, DNA-dependent (GO:0006355), Molecular Function: DNA binding (GO:0003677), Molecular Function: sequence-specific DNA binding transcription factor activity (GO:0003700)
Os01g0714600	-1.47929	9.04169e-13	0	0	Similar to cDNA clone:J023088C01, full insert sequence.	0
Os10g0392400	-1.48108	5.63687e-05	OsTIFY11d, OsJAZ1, JAZ1, OsJAZ 12, OsJAZ12, JAZ12	TIFY DOMAIN PROTEIN 11d	Tify domain containing protein.	Molecular Function: protein binding (GO:0005515)
Os04g0664900	-1.48667	0.00350904	OsCIN5, OsCIN6	0	Similar to H1005F08.5 protein.	Biological Process: carbohydrate metabolic process (GO:0005975), Molecular Function: hydrolase activity, hydrolyzing O-glycosyl compounds (GO:0004553)
Os05g0261001	-1.4895	1.306e-05			Non-protein coding transcript.	0
Os04g0556500	-1.49772	0.000570503	OscZOGT1, cZOGT1	CIS-ZEATIN O-GLUCOSYLTRANSFERASE 1	cis-Zeatin-O-glucosyltransferase, Catalyze O-glucosylation of cZ and cZ-riboside	Biological Process: metabolic process (GO:0008152), Molecular Function: transferase activity, transferring hexosyl groups (GO:0016758)
Os12g0116700	-1.50866	4.19217e-06	OsWRKY64	TRANSCRIPTION FACTOR WRKY64	Similar to WRKY transcription factor 64.	Biological Process: regulation of transcription, DNA-dependent (GO:0006355), Molecular Function: sequence-specific DNA binding transcription factor activity (GO:0003700), Molecular Function: sequence-specific DNA binding (GO:0043565)
Os09g0542900	-1.50886	0.000860701			Conserved hypothetical protein.	0
Os04g0371200	-1.53127	0.000335247	OsRLCK148	RECEPTOR-LIKE CYTOPLASMIC KINASE 148	Similar to OSIGBa0134J07.8 protein.	Biological Process: protein phosphorylation (GO:0006468), Molecular Function: protein kinase activity (GO:0004672), Molecular Function: protein serine/threonine kinase activity (GO:0004674), Molecular Function: protein tyrosine kinase activity (GO:0004713), Molecular Function: ATP binding (GO:0005524), Molecular Function: transferase activity, transferring phosphorus-containing groups (GO:0016772)
Os04g0554600	-1.53306	0.000609796	OsHyPRP07		Similar to RCc3 protein.	Biological Process: lipid transport (GO:0006869)
Os01g0112000	-1.5458	1.96712e-08			Conserved hypothetical protein.	0
Os03g0122300	-1.56254	6.38143e-08	FLS	0	Similar to Flavanone 3-hydroxylase-like protein.	Biological Process: oxidation-reduction process (GO:0055114), Molecular Function: oxidoreductase activity (GO:0016491), Molecular Function: oxidoreductase activity, acting on paired donors, with incorporation or reduction of molecular oxygen, 2-oxoglutarate as one donor, and incorporation of one atom each of oxygen into both donors (GO:0016706)
Os04g0142400	-1.56803	0.000233791			Conserved hypothetical protein.	0
Os01g0588100	-1.57618	3.69161e-05			Similar to Hypersensitive-induced response protein.	Cellular Component: membrane (GO:0016020)
Os10g0498100	-1.58481	0.000220092			Alpha/beta hydrolase fold-1 domain containing protein.	Molecular Function: catalytic activity (GO:0003824)
Os01g0660200	-1.59128	8.26089e-06	C10728, OsChib3a	0	Acidic class III chitinase OsChib3a precursor (Chitinase) (EC 3.2.1.14).	Biological Process: carbohydrate metabolic process (GO:0005975), Molecular Function: catalytic activity (GO:0003824), Molecular Function: hydrolase activity, hydrolyzing O-glycosyl compounds (GO:0004553), Molecular Function: cation binding (GO:0043169)
Os07g0410300	-1.59266	0.000416716	OsERF#136, OsERF136, AP2/EREBP#106, AP2/EREBP106, AP2-106	ETHYLENE RESPONSE FACTOR 136	Conserved hypothetical protein.	0
Os03g0277700	-1.60204	4.91603e-06			Protein of unknown function DUF26 domain containing protein.	0
Os09g0412300	-1.60625	5.04875e-05			Similar to Calmodulin-like protein.	0
Os01g0880800	-1.61348	0.00142358			Similar to Acyl-[acyl-carrier-protein] desaturase, chloroplast precursor (EC 1.14.19.2) (Stearoyl-ACP desaturase).	Biological Process: fatty acid metabolic process (GO:0006631), Biological Process: oxidation-reduction process (GO:0055114), Molecular Function: oxidoreductase activity (GO:0016491), Molecular Function: acyl-[acyl-carrier-protein] desaturase activity (GO:0045300), Molecular Function: transition metal ion binding (GO:0046914)
Os04g0635400	-1.61357	0.000340526			Conserved hypothetical protein.	0
Os11g0592000	-1.61672	0.00539467	OsPR4c	PATHOGENESIS-RELATED PROTEIN 4C	Similar to Barwin.	Biological Process: defense response to bacterium (GO:0042742), Biological Process: defense response to fungus (GO:0050832)
Os07g0194500	-1.61792	0.000351305			2OG-Fe(II) oxygenase domain containing protein.	Biological Process: oxidation-reduction process (GO:0055114), Molecular Function: iron ion binding (GO:0005506), Molecular Function: oxidoreductase activity (GO:0016491), Molecular Function: oxidoreductase activity, acting on paired donors, with incorporation or reduction of molecular oxygen (GO:0016705), Molecular Function: oxidoreductase activity, acting on paired donors, with incorporation or …
Os02g0649800	-1.62643	2.8198e-06			Similar to Cytochrome B5 homolog (Fragment).	Molecular Function: heme binding (GO:0020037)
Os08g0128000	-1.6282	1.00142e-07			Galactose oxidase/kelch, beta-propeller domain containing protein.	Molecular Function: protein binding (GO:0005515)
Os02g0570700	-1.62859	0.00100435	Oscyp71Z7	CYTOCHROME P450 71Z7	Cytochrome P450 family protein.	Biological Process: oxidation-reduction process (GO:0055114), Molecular Function: iron ion binding (GO:0005506), Molecular Function: electron carrier activity (GO:0009055), Molecular Function: oxidoreductase activity, acting on paired donors, with incorporation or reduction of molecular oxygen (GO:0016705), Molecular Function: heme binding (GO:0020037)
Os04g0538400	-1.63201	0.00696004	OsVITH2	0	Similar to Nodulin 21 (N-21).	0
Os02g0181300	-1.64093	2.20227e-07	OsWRKY71, WRKY-71	TRANSCRIPTION FACTOR WRKY71	WRKY transcription factor, Defense response	Biological Process: regulation of transcription, DNA-templated (GO:0006355), Molecular Function: transcription factor activity, sequence-specific DNA binding (GO:0003700), Molecular Function: sequence-specific DNA binding (GO:0043565)
Os02g0585100	-1.65108	3.32903e-08			Similar to ATFP4.	Biological Process: metal ion transport (GO:0030001), Molecular Function: metal ion binding (GO:0046872)
Os07g0190800	-1.66142	3.42172e-07	OsTRXh5, OsTrx24, Os4, OsTrxh4	THIOREDOXIN H-TYPE 5	Similar to Thioredoxin h.	Biological Process: glycerol ether metabolic process (GO:0006662), Biological Process: cell redox homeostasis (GO:0045454), Molecular Function: electron carrier activity (GO:0009055), Molecular Function: protein disulfide oxidoreductase activity (GO:0015035)
Os10g0161400	-1.67258	1.61379e-13			NB-ARC domain containing protein.	Biological Process: defense response (GO:0006952), Molecular Function: ADP binding (GO:0043531)
Os02g0106100	-1.67396	4.22587e-05	OSINV3, OsINV3, INV3, OsVIN2, VIN2, VINV	0	Similar to Fructosyltransferase.	Biological Process: carbohydrate metabolic process (GO:0005975), Molecular Function: hydrolase activity, hydrolyzing O-glycosyl compounds (GO:0004553), Molecular Function: beta-fructofuranosidase activity (GO:0004564), Molecular Function: sucrose alpha-glucosidase activity (GO:0004575)
Os01g0186900	-1.67671	7.06576e-07			Similar to cDNA clone:001-117-G12, full insert sequence.	0
Os07g0448600	-1.68008	1.63469e-06			Hypothetical protein.	0
Os01g0905200	-1.6958	1.92154e-05			Exo70 exocyst complex subunit family protein.	Biological Process: exocytosis (GO:0006887), Cellular Component: exocyst (GO:0000145)
Os05g0555600	-1.72008	0.000129293	OsGLT2, OsNADH-GOGAT2, NADH-GOGAT2, OsGOGAT2	NADH-DEPENDENT GLUTAMATE SYNTHASE 2	Similar to Glutamate synthase [NADH], amyloplastic.	Biological Process: glutamate biosynthetic process (GO:0006537), Biological Process: metabolic process (GO:0008152), Biological Process: oxidation-reduction process (GO:0055114), Molecular Function: oxidoreductase activity (GO:0016491), Molecular Function: oxidoreductase activity, acting on the CH-NH2 group of donors, NAD or NADP as acceptor (GO:0016639), Molecular Function: iron-sulfur cluster b…
Os02g0624300	-1.72075	7.60989e-05	OsMYB30, MYB30	0	R2R3-type MYB transcription factor, Negative regulation of cold tolerance	Molecular Function: DNA binding (GO:0003677)
Os10g0535800	-1.72548	4.73048e-09			Protein of unknown function Cys-rich domain containing protein.	0
Os07g0225300	-1.73144	0.001843	OsNAC3, NAC67, ONAC067, OnNAC3*, OsNAC3/ONAC067	NAC DOMAIN-CONTAINING PROTEIN 3	OsNAC3 protein.	Biological Process: regulation of transcription, DNA-dependent (GO:0006355), Molecular Function: DNA binding (GO:0003677)
Os04g0684900	-1.76146	4.57059e-05	OsCAF1B		Component of the CCR4-NOTcomplex, Deadenylase, Deadenylation (poly(A) tail shortening), Development and stress response	Molecular Function: nucleic acid binding (GO:0003676), Cellular Component: nucleus (GO:0005634)
Os04g0635500	-1.76149	1.44533e-09			Similar to Wound induced protein (Fragment).	0
Os05g0181700	-1.76454	0.00387577			Conserved hypothetical protein.	0
Os02g0467600	-1.76643	0.000679268	C4H1, OsC4H	0	Similar to Cinnamate 4-hydroxylase CYP73.	Biological Process: oxidation-reduction process (GO:0055114), Molecular Function: iron ion binding (GO:0005506), Molecular Function: electron carrier activity (GO:0009055), Molecular Function: oxidoreductase activity, acting on paired donors, with incorporation or reduction of molecular oxygen (GO:0016705), Molecular Function: heme binding (GO:0020037)
Os04g0447100	-1.77827	0.000974362	OsLOX6	LIPOXYGENASE 6	Similar to Lipoxygenase.	Biological Process: oxidation-reduction process (GO:0055114), Molecular Function: iron ion binding (GO:0005506), Molecular Function: protein binding (GO:0005515), Molecular Function: lipoxygenase activity (GO:0016165), Molecular Function: oxidoreductase activity, acting on single donors with incorporation of molecular oxygen, incorporation of two atoms of oxygen (GO:0016702), Molecular Function: …
Os11g0154500	-1.7893	0.000595035	ONAC017, ONAC17, ONAC030, ONAC30, OsNAC111	NAC DOMAIN-CONTAINING PROTEIN 17	Blast disease-responsive transcription factor, Disease resistance	Biological Process: regulation of transcription, DNA-templated (GO:0006355), Molecular Function: DNA binding (GO:0003677)
Os04g0387300	-1.79369	3.04673e-06			Similar to OSIGBa0075F02.1 protein.	Molecular Function: DNA binding (GO:0003677), Molecular Function: protein dimerization activity (GO:0046983)
Os05g0591600	-1.79429	3.23105e-07	LOGL8	LONELY GUY LIKE PHOSPHORIBOHYDROLASE 8	Similar to Carboxy-lyase.	0
Os02g0807900	-1.80466	4.69655e-09	OsWAK21	WALL-ASSOCIATED KINASE 21	Conserved hypothetical protein.	0
Os04g0518400	-1.81383	3.27122e-06	OsPAL07, OsPAL, PAL07, OsPAL6, PAL1, OsPAL7, PAL7	0	Similar to Phenylalanine ammonia-lyase (Fragment).	Biological Process: L-phenylalanine catabolic process (GO:0006559), Biological Process: biosynthetic process (GO:0009058), Cellular Component: cytoplasm (GO:0005737), Molecular Function: catalytic activity (GO:0003824), Molecular Function: ammonia-lyase activity (GO:0016841)
Os10g0452100	-1.82368	1.01617e-05			Conserved hypothetical protein.	0
Os11g0664800	-1.82525	0.00885231			Hypothetical conserved gene.	0
Os02g0585200	-1.83026	0.000348675			Heavy metal transport/detoxification protein domain containing protein.	Biological Process: metal ion transport (GO:0030001), Molecular Function: metal ion binding (GO:0046872)
Os03g0739700	-1.84262	1.76612e-10			Uncharacterised protein family UPF0114 domain containing protein.	0
Os11g0144900	-1.84654	0.006414			Conserved hypothetical protein.	0
Os08g0402500	-1.8491	7.03301e-06			Protein of unknown function DUF761, plant domain containing protein.	0
Os03g0181100	-1.85444	9.68953e-09	OsJAZ4, JAZ4, OsJAZ 10, OsJAZ10, JAZ10, OsTIFY11b	TIFY-DOMAIN PROTEIN 11B	Tify domain containing protein.	Molecular Function: protein binding (GO:0005515)
Os10g0491000	-1.85948	0.000342215			Plant Basic Secretory Protein family protein.	0
Os04g0347200	-1.8614	0.00135023			Similar to OSIGBa0111I14.7 protein.	Biological Process: carbohydrate metabolic process (GO:0005975), Molecular Function: catalytic activity (GO:0003824), Molecular Function: hydrolase activity, hydrolyzing O-glycosyl compounds (GO:0004553), Molecular Function: cation binding (GO:0043169)
Os04g0635000	-1.86541	1.2692e-06			Similar to H0315F07.10 protein.	0
Os11g0210201	-1.86984	4.57664e-12	RZ53	0	Conserved hypothetical protein.	0
Os04g0607600	-1.87434	0.0013576	OsHKT7, OsHKT1;4, HKT1;4	HIGH-AFFINITY K+ TRANSPORTER 7	High-affinity K+ transporter (HKT) family protein, Na+ exclusion from leaf blade upon salt stress	Biological Process: cation transport (GO:0006812), Biological Process: transmembrane transport (GO:0055085), Molecular Function: cation transmembrane transporter activity (GO:0008324)
Os06g0683800	-1.87712	7.22567e-05			Conserved hypothetical protein.	0
Os06g0185500	-1.87792	0.0018288	OsHCT4	HYDROXYCINNAMOYLTRANSFERASE 4	Transferase family protein.	Molecular Function: transferase activity, transferring acyl groups other than amino-acyl groups (GO:0016747)
Os01g0821600	-1.87821	2.28395e-05	OsWRKY21	TRANSCRIPTION FACTOR WRKY21	WRKY transcription factor 48-like protein (WRKY transcription factor 21).	Biological Process: regulation of transcription, DNA-dependent (GO:0006355), Molecular Function: sequence-specific DNA binding transcription factor activity (GO:0003700), Molecular Function: sequence-specific DNA binding (GO:0043565)
Os04g0586500	-1.88412	0.000126134			Malectin-like carbohydrate-binding domain domain containing protein.	0
Os10g0419400	-1.89376	2.3779e-08	Sip2, OsARD1, ARD1, OsIDI1, IDI1, OsIDI1L/OsARD1	SUBMERGENCE-INDUCED PROTEIN 2	Similar to SIPL.	Biological Process: oxidation-reduction process (GO:0055114), Molecular Function: acireductone dioxygenase [iron(II)-requiring] activity (GO:0010309)
Os10g0552300	-1.9197	3.48598e-07	OsHyPRP17		Conserved hypothetical protein.	0
Os08g0360300	-1.92078	0.00218294			Calmodulin binding protein-like domain containing protein.	0
Os03g0766800	-1.92831	7.8139e-07			Conserved hypothetical protein.	0
Os01g0895300	-1.92835	0.0023449			Cytochrome b561, eukaryote domain containing protein.	Cellular Component: integral to membrane (GO:0016021)
Os11g0700900	-1.93271	0.0073445	C10923	0	Glycoside hydrolase, subgroup, catalytic core domain containing protein.	Biological Process: carbohydrate metabolic process (GO:0005975), Molecular Function: catalytic activity (GO:0003824), Molecular Function: cation binding (GO:0043169)
Os09g0396900	-1.93477	0.00408399	OsVIT2, OsVIT1	0	Protein of unknown function DUF125, transmembrane family protein.	0
Os02g0626532	-1.9354	2.14323e-06			Hypothetical gene.	0
Os02g0584200	-1.94782	0.000265362	OsRSP3, RSP3	0	Conserved hypothetical protein.	0
Os02g0584700	-1.95011	1.85103e-13			Heavy metal transport/detoxification protein domain containing protein.	Biological Process: metal ion transport (GO:0030001), Molecular Function: metal ion binding (GO:0046872)
Os04g0634900	-1.9545	1.76038e-08			Similar to H0315F07.9 protein.	0
Os02g0767800	-1.9568	0.00135023	AP2/EREBP#139	APETALA2/ETHYLENE-RESPONSIVE ELEMENT BINDING PROTEIN 139	Similar to DNA binding protein.	Biological Process: regulation of transcription, DNA-dependent (GO:0006355), Molecular Function: DNA binding (GO:0003677), Molecular Function: sequence-specific DNA binding transcription factor activity (GO:0003700)
Os05g0560900	-1.95978	9.31742e-08	OsGA2ox8	GIBBERELLIN 2-OXIDASE 8	Similar to gibberellin 2-beta-dioxygenase.	Biological Process: oxidation-reduction process (GO:0055114), Molecular Function: iron ion binding (GO:0005506), Molecular Function: oxidoreductase activity (GO:0016491), Molecular Function: oxidoreductase activity, acting on paired donors, with incorporation or reduction of molecular oxygen, 2-oxoglutarate as one donor, and incorporation of one atom each of oxygen into both donors (GO:0016706)
Os01g0266400	-1.98715	3.15353e-06			Conserved hypothetical protein.	0
Os01g0129600	-2.03057	5.6596e-05			Similar to LBD40 (LOB DOMAIN-CONTAINING PROTEIN 40).	0
Os08g0352100	-2.03085	0.00764202			Conserved hypothetical protein.	0
Os07g0127500	-2.04759	0.000206445	OsPR1#072, OsPR1-72	PATHOGENESIS-RELATED PROTEIN 1-72	Similar to PR-1a pathogenesis related protein (Hv-1a) precursor.	Cellular Component: extracellular region (GO:0005576)
Os11g0255500	-2.06301	0.002182			Similar to Allyl alcohol dehydrogenase; NADP-dependent oxidoreductase-like protein.	Biological Process: oxidation-reduction process (GO:0055114), Molecular Function: nucleotide binding (GO:0000166), Molecular Function: zinc ion binding (GO:0008270), Molecular Function: oxidoreductase activity (GO:0016491)
Os09g0341600	-2.07699	0.00210531	OsFbox478, Os_F0354	0	Cyclin-like F-box domain containing protein.	Molecular Function: protein binding (GO:0005515)
Os03g0803300	-2.11551	0.000673657			Non-protein coding transcript.	0
Os10g0552200	-2.12396	0.000126134	OsHyPRP16		Plant lipid transfer protein and hydrophobic protein, helical domain containing protein.	Biological Process: lipid transport (GO:0006869)
Os06g0128800	-2.12417	7.7237e-05			C2 calcium/lipid-binding domain, CaLB domain containing protein.	Molecular Function: protein binding (GO:0005515)
Os03g0183500	-2.13808	1.64511e-08			Protein of unknown function DUF581 family protein.	0
Os03g0741100	-2.14211	1.00291e-09	OsbHLH148	_	Basic helix-loop-helix transcription factor, Drought tolerance	Molecular Function: protein dimerization activity (GO:0046983)
Os08g0203400	-2.15343	4.64159e-31	SHR5	0	Protein kinase, core domain containing protein.	Biological Process: protein phosphorylation (GO:0006468), Molecular Function: protein kinase activity (GO:0004672), Molecular Function: protein serine/threonine kinase activity (GO:0004674), Molecular Function: protein binding (GO:0005515), Molecular Function: ATP binding (GO:0005524), Molecular Function: transferase activity, transferring phosphorus-containing groups (GO:0016772)
Os01g0895200	-2.15633	0.000172076			DOMON related domain containing protein.	Cellular Component: integral to membrane (GO:0016021)
Os11g0462500	-2.15883	5.98861e-06			Similar to NB-ARC domain containing protein.	Biological Process: defense response (GO:0006952), Molecular Function: ADP binding (GO:0043531)
Os03g0676400	-2.18658	4.99138e-05	OsVQ13	0	VQ domain containing protein.	0
Os02g0682300	-2.19869	2.40692e-08			RING-type E3 ligase, Negative regulation of cuticular wax biosynthesis, Drought stress response	0
Os03g0341000	-2.20325	6.96788e-07	OsERF#066, OsERF066, OsERF66, AP2/EREBP#030, AP2/EREBP30	ETHYLENE RESPONSE FACTOR 66	Similar to AP2 domain containing protein RAP2.2 (Fragment).	Biological Process: regulation of transcription, DNA-dependent (GO:0006355), Molecular Function: DNA binding (GO:0003677), Molecular Function: sequence-specific DNA binding transcription factor activity (GO:0003700)
Os04g0635650	-2.20536	4.55762e-07			Non-protein coding transcript.	0
Os04g0469000	-2.20729	0.000645517			Heavy metal transport/detoxification protein domain containing protein.	0
Os10g0537800	-2.20856	9.00737e-11			Peptidase aspartic, catalytic domain containing protein.	Biological Process: proteolysis (GO:0006508), Molecular Function: aspartic-type endopeptidase activity (GO:0004190)
Os05g0554000	-2.21939	0.00082043	OsMATE2	0	Similar to cDNA clone:001-123-D07, full insert sequence.	Biological Process: drug transmembrane transport (GO:0006855), Biological Process: transmembrane transport (GO:0055085), Cellular Component: membrane (GO:0016020), Molecular Function: drug transmembrane transporter activity (GO:0015238), Molecular Function: antiporter activity (GO:0015297)
Os03g0233900	-2.21955	0.000618816	HB1, GLB1A, rHb1, ORYsa GLB1a, nsHb1, OsNSHB1, hb1, nsHb	HEMOGLOBIN 1	Non-symbiotic hemoglobin 1 (rHb1) (ORYsa GLB1a).	Biological Process: oxygen transport (GO:0015671), Molecular Function: iron ion binding (GO:0005506), Molecular Function: oxygen binding (GO:0019825), Molecular Function: heme binding (GO:0020037)
Os11g0679700	-2.22551	7.83369e-06	OsGPAT3		Glycerol-3-phosphate acyltransferase, Anther development, Pollen formation	Biological Process: metabolic process (GO:0008152), Molecular Function: transferase activity, transferring acyl groups (GO:0016746)
Os02g0584800	-2.24479	1.62604e-05			Heavy metal transport/detoxification protein domain containing protein.	Biological Process: metal ion transport (GO:0030001), Molecular Function: metal ion binding (GO:0046872)
Os07g0558900	-2.25017	0.000222144			Protein of unknown function wound-induced domain containing protein.	0
Os03g0619875	-2.28603	2.23696e-18			Conserved hypothetical protein.	0
Os06g0142350	-2.30556	0.00181198	UDP-GT, OsENOD93-1	0	Similar to Early nodulin.	0
Os04g0581100	-2.34778	3.00111e-05	OsS3H, S3H	0	2OG-Fe(II) oxygenase domain containing protein.	Biological Process: oxidation-reduction process (GO:0055114), Molecular Function: oxidoreductase activity (GO:0016491), Molecular Function: oxidoreductase activity, acting on paired donors, with incorporation or reduction of molecular oxygen, 2-oxoglutarate as one donor, and incorporation of one atom each of oxygen into both donors (GO:0016706)
Os04g0301500	-2.38537	0.00378327	OsbHLH006, RERJ1	RERJ1	Helix-loop-helix DNA-binding domain containing protein.	0
Os04g0345800	-2.40666	1.50816e-06	ARD3		Similar to OSIGBa0127B24.5 protein.	Biological Process: oxidation-reduction process (GO:0055114), Molecular Function: acireductone dioxygenase [iron(II)-requiring] activity (GO:0010309)
Os01g0905300	-2.41314	3.89158e-07	OsExo70FX14		Similar to Leucine zipper protein-like.	0
Os04g0635100	-2.42499	8.75184e-08			Similar to H0315F07.12 protein.	0
Os12g0594950	-2.43026	1.64798e-05			Hypothetical conserved gene.	0
Os01g0910900	-2.45558	5.47628e-10			Conserved hypothetical protein.	0
Os06g0591200	-2.48836	5.92613e-09			Conserved hypothetical protein.	0
Os09g0412700	-2.49568	2.06883e-15			Conserved hypothetical protein.	0
Os02g0802500	-2.49751	2.17017e-07			Similar to H(+)-translocating (Pyrophosphate-ENERGIZED) inorganic pyrophosphatase beta-1 polypeptide (EC 3.6.1.1) (Fragment).	Biological Process: proton transport (GO:0015992), Cellular Component: membrane (GO:0016020), Molecular Function: inorganic diphosphatase activity (GO:0004427), Molecular Function: hydrogen-translocating pyrophosphatase activity (GO:0009678)
Os01g0508500	-2.51436	2.9704e-11	RH2	0	Conserved hypothetical protein.	0
Os03g0643250	-2.53346	5.53387e-13			Similar to Hydrolase-like protein.	0
Os10g0137300	-2.56358	0.00902433			Similar to BLN1-1.	0
Os01g0720700	-2.57611	4.7241e-07	OsSAT, SAT	0	Similar to satase isoform I.	0
Os09g0564700	-2.58586	4.52809e-12			Similar to Vignain.	Biological Process: proteolysis (GO:0006508), Molecular Function: cysteine-type endopeptidase activity (GO:0004197), Molecular Function: cysteine-type peptidase activity (GO:0008234)
Os09g0417800	-2.58737	0.00149822	OsWRKY62, OsWRKY62.1, OsWRKY62.2, XB10	TRANSCRIPTION FACTOR WRKY62	WRKY transcription factor, Transcriptional repressor, Pathogen defense	Biological Process: regulation of transcription, DNA-templated (GO:0006355), Molecular Function: transcription factor activity, sequence-specific DNA binding (GO:0003700), Molecular Function: sequence-specific DNA binding (GO:0043565)
Os06g0142200	-2.62228	3.33524e-11			Early nodulin.	0
Os01g0155800	-2.65413	1.17134e-08			Conserved hypothetical protein.	0
Os10g0204400	-2.68891	7.30529e-15	PEPCK	0	Similar to Phosphoenolpyruvate carboxykinase (Fragment).	Biological Process: gluconeogenesis (GO:0006094), Molecular Function: phosphoenolpyruvate carboxykinase activity (GO:0004611), Molecular Function: phosphoenolpyruvate carboxykinase (ATP) activity (GO:0004612), Molecular Function: ATP binding (GO:0005524), Molecular Function: purine nucleotide binding (GO:0017076)
Os06g0649000	-2.68928	1.59502e-07	OsWRKY28	TRANSCRIPTION FACTOR WRKY28	PAMP (pathogen-associated molecular pattern)-responsive transrepressor, Defense response	Biological Process: regulation of transcription, DNA-templated (GO:0006355), Molecular Function: transcription factor activity, sequence-specific DNA binding (GO:0003700), Molecular Function: sequence-specific DNA binding (GO:0043565)
Os06g0142300	-2.70502	1.77985e-09	OsENOD93	0	Early nodulin 93 ENOD93 protein family protein.	0
Os03g0595600	-2.77964	2.8049e-13	OsGSTU43	TAU GLUTATHIONE S-TRANSFERASE 43	Similar to Glutathione S-transferase, N-terminal domain containing protein, expressed.	0
Os08g0347000	-2.86534	0.00094564			Hypothetical conserved gene.	0
Os01g0127000	-2.97536	2.69545e-09	OsLPR3		Multicopper oxidase, Maintenance of Pi homeostasis	Biological Process: oxidation-reduction process (GO:0055114), Molecular Function: copper ion binding (GO:0005507), Molecular Function: oxidoreductase activity (GO:0016491)
Os03g0335200	-3.01687	3.14662e-11	OsWRKY79, WRKY-79	TRANSCRIPTION FACTOR WRKY	Similar to WRKY1 (WRKY transcription factor 17).	Biological Process: regulation of transcription, DNA-dependent (GO:0006355), Molecular Function: sequence-specific DNA binding transcription factor activity (GO:0003700), Molecular Function: sequence-specific DNA binding (GO:0043565)
Os03g0195100	-3.01899	4.06768e-07	OsALD1, ALD1		Putative aminotransferase, Disease resistance response against infection with rice blast fungus	Biological Process: biosynthetic process (GO:0009058), Biological Process: lysine biosynthetic process via diaminopimelate (GO:0009089), Molecular Function: catalytic activity (GO:0003824), Molecular Function: L, L-diaminopimelate aminotransferase activity (GO:0010285), Molecular Function: pyridoxal phosphate binding (GO:0030170)
Os06g0592500	-3.10776	0.00246803			Similar to Ethylene-responsive transcriptional coactivator.	Molecular Function: DNA binding (GO:0003677), Molecular Function: sequence-specific DNA binding (GO:0043565)
Os07g0251900	-3.11621	1.35765e-14			Leucine-rich repeat, N-terminal domain containing protein.	Molecular Function: protein binding (GO:0005515)
Os03g0180800	-3.13048	8.52361e-07	OsJAZ3, JAZ3, OsJAZ 9, OsJAZ9, Os-JAZ9, JAZ9, OsTIFY11a	TIFY-DOMAIN PROTEIN 11A	TIFY domain-containing transcriptional regulator, Salt and dehydration stress tolerance	0
Os09g0417600	-3.22236	3.20228e-05	OsWRKY76, OsWRKY76.1, OsWRKY76.2, OsWRKY76.3	TRANSCRIPTION FACTOR WRKY76	WRKY transcription factor, Transcriptional repressor, Pathogen defense	Biological Process: regulation of transcription, DNA-templated (GO:0006355), Molecular Function: transcription factor activity, sequence-specific DNA binding (GO:0003700), Molecular Function: sequence-specific DNA binding (GO:0043565)
Os01g0508100	-3.25379	2.99379e-33	RH3		Ferritin/ribonucleotide reductase-like family protein.	0
Os06g0141600	-3.30974	1.15029e-05	OsENOD93		Early nodulin 93 ENOD93 protein family protein.	0
Os05g0404700	-3.33522	3.34454e-18			Similar to MBD1.	Cellular Component: nucleus (GO:0005634), Molecular Function: DNA binding (GO:0003677), Molecular Function: zinc ion binding (GO:0008270)
Os01g0313300	-3.3469	2.78585e-06	OsERF#068, OsERF068, OsERF68, AP2/EREBP#003, AP2/EREBP3, ERF2	ETHYLENE RESPONSE FACTOR 68	Similar to EREBP-3 protein (Fragment).	Biological Process: regulation of transcription, DNA-dependent (GO:0006355), Molecular Function: DNA binding (GO:0003677), Molecular Function: sequence-specific DNA binding transcription factor activity (GO:0003700)
Os05g0244700	-3.36449	9.17465e-08	OsAT-IV		Aminotransferase, class IV family protein.	Biological Process: metabolic process (GO:0008152), Molecular Function: catalytic activity (GO:0003824)
Os11g0687100	-3.47381	3.85545e-09			von Willebrand factor, type A domain containing protein.	Molecular Function: protein binding (GO:0005515)
Os03g0655100	-3.52767	1.11748e-07			Similar to Cupin, RmlC-type.	Biological Process: oxidation-reduction process (GO:0055114), Molecular Function: cysteamine dioxygenase activity (GO:0047800)
Os08g0346900	-3.53111	0.00718629			Hypothetical conserved gene.	0
Os11g0592200	-3.68316	0.00288031	OsPR4, OsPR4a, PR4a, OsPR-4	PATHOGENESIS-RELATED PROTEIN 4	Similar to Chitin-binding allergen Bra r 2 (Fragments).	Biological Process: defense response to bacterium (GO:0042742), Biological Process: defense response to fungus (GO:0050832)
Os07g0124100	-3.68864	7.38169e-15	OsPSK4, Psk4	PHYTOSULFOKINE 4	Similar to Phytosulfokines 4 precursor.	Biological Process: cell proliferation (GO:0008283), Cellular Component: extracellular region (GO:0005576), Molecular Function: growth factor activity (GO:0008083)
Os03g0766600	-3.79328	4.14543e-19			Conserved hypothetical protein.	0
Os02g0811800	-3.85887	0.00359277	OsCCR10, CCR10	CINNAMOYL-COA REDUCTASE 10	Similar to Cinnamoyl-CoA reductase (EC 1.2.1.44).	Biological Process: cellular metabolic process (GO:0044237), Molecular Function: nucleotide binding (GO:0000166), Molecular Function: catalytic activity (GO:0003824), Molecular Function: coenzyme binding (GO:0050662)
Os10g0407200	-3.91388	7.56979e-12			Protein of unknown function DUF962 family protein.	0
Os08g0518900	-4.03084	6.45697e-06	C10122		Chitinase (EC 3.2.1.14).	Biological Process: carbohydrate metabolic process (GO:0005975), Molecular Function: catalytic activity (GO:0003824), Molecular Function: hydrolase activity, hydrolyzing O-glycosyl compounds (GO:0004553), Molecular Function: cation binding (GO:0043169)
Os07g0604600	-4.08221	0.000616507			Similar to B12D protein.	0
Os07g0129300	-4.33603	0.000221444	OsPR1, OsPR1a, PR1a, PR1		Similar to PR1a protein.	Cellular Component: extracellular region (GO:0005576)
Os11g0484700	-4.41902	3.75014e-07	OsLTPd12, OsLtpVI.4		Bifunctional inhibitor/plant lipid transfer protein/seed storage domain containing protein.	Biological Process: lipid transport (GO:0006869)
Os11g0701800	-4.5398	0.00142358	C10701		Chitinase (EC 3.2.1.14) III C10701-rice (EC 3.2.1.14) (Class III chitinase homologue (OsChib3H-a)H-).	Biological Process: carbohydrate metabolic process (GO:0005975), Molecular Function: catalytic activity (GO:0003824), Molecular Function: hydrolase activity, hydrolyzing O-glycosyl compounds (GO:0004553), Molecular Function: cation binding (GO:0043169)
Os03g0182900	-4.65389	2.7023e-08			Non-protein coding transcript.	0
Os09g0323500	-4.80227	6.27257e-11			Protein of unknown function DUF833 family protein.	0
Os09g0564600	-5.13374	4.64159e-31			Peptidase C1A, papain family protein.	Biological Process: proteolysis (GO:0006508), Molecular Function: cysteine-type endopeptidase activity (GO:0004197), Molecular Function: cysteine-type peptidase activity (GO:0008234)
Os09g0471000	-5.2417	5.70903e-11		Cysteamine dioxygenase	Similar to cupin, RmlC-type.	Biological Process: oxidation-reduction process (GO:0055114), Molecular Function: cysteamine dioxygenase activity (GO:0047800)
Os10g0451900	-5.30825	0.0072765	0	Glycine-rich cell wall structural protein	Peptidase S8 and S53, subtilisin, kexin, sedolisin domain containing protein.	0
Os02g0808800	-5.83804	3.94375e-24	OsCCR1		Similar to Cinnamoyl-CoA reductase (EC 1.2.1.44).	Biological Process: cellular metabolic process (GO:0044237), Molecular Function: nucleotide binding (GO:0000166), Molecular Function: catalytic activity (GO:0003824), Molecular Function: coenzyme binding (GO:0050662)
Os05g0469800	-6.6694	4.62009e-17			Pyruvate decarboxylase (EC 4.1.1.1) (Fragment).	Molecular Function: magnesium ion binding (GO:0000287), Molecular Function: catalytic activity (GO:0003824), Molecular Function: carboxy-lyase activity (GO:0016831), Molecular Function: thiamine pyrophosphate binding (GO:0030976)
Os04g0375300	-7.01026	1.20202e-10	rNBS56		Similar to NBS-LRR protein (Fragment).	Biological Process: defense response (GO:0006952), Molecular Function: ADP binding (GO:0043531)
Os06g0104900	-7.06623	2.29569e-19			Similar to L-lactate dehydrogenase B (EC 1.1.1.27) (LDH-B) (Fragment).	Biological Process: carbohydrate metabolic process (GO:0005975), Biological Process: glycolysis (GO:0006096), Biological Process: cellular carbohydrate metabolic process (GO:0044262), Biological Process: oxidation-reduction process (GO:0055114), Cellular Component: cytoplasm (GO:0005737), Molecular Function: nucleotide binding (GO:0000166), Molecular Function: catalytic activity (GO:0003824), Mol…
Os06g0279900	-7.61281	1.08026e-22			Similar to NB-ARC domain containing protein, expressed.	Biological Process: defense response (GO:0006952), Molecular Function: ADP binding (GO:0043531)
Os03g0432100	-8.1134	1.57569e-63	osppdka, ppdka		Similar to Pyruvate, phosphate dikinase 2.	0
Os05g0469600	-8.50477	4.44047e-08	pdc1*, pdc1, pdc4, pdc 1, PDC 1, RRJ2	PYRUVATE DECARBOXYLASE 1	Similar to Pyruvate decarboxylase (Fragment).	Molecular Function: magnesium ion binding (GO:0000287), Molecular Function: catalytic activity (GO:0003824), Molecular Function: carboxy-lyase activity (GO:0016831), Molecular Function: thiamine pyrophosphate binding (GO:0030976)
Os01g0498802	-8.69895	9.73332e-10			Non-protein coding transcript.	0
Os07g0531200	-8.9133	1.76612e-10			Conserved hypothetical protein.	0
Os02g0587600	-10.1286	1.77505e-11			Conserved hypothetical protein.	0
Os10g0451700	-10.297	9.73335e-15			Hypothetical protein.	0
