# Supplementary material for: Paraburkholderia phytofirmans PsJN colonization of rice endosphere triggers an atypical transcriptomic response compared to rice native Burkholderia s.l. endophytes
Source: Sci Rep. 2023 Jul 3;13:10696. doi: 10.1038/s41598-023-37314-7 (PMC10317989; doi:10.1038/s41598-023-37314-7)
Supplement: Supplementary file 10 — Supplementary Table S4. [file 41598_2023_37314_MOESM10_ESM.xlsx]

## Sheet: GO BP
Supplementary Table S4 : GO term enrichment analysis
Organ	Regulation	Term	Category	padj	Ratio
Leaves	Up	photosynthesis	Photosynthesis	3.62904e-39	5.60212
Leaves	Up	photosynthesis, light reaction	Photosynthesis	1.0393e-28	6.9646
Leaves	Up	biological process	Other	1.06092e-22	1.20138
Leaves	Up	generation of precursor metabolites and energy	Metabolism	8.402e-18	2.72342
Leaves	Up	response to abiotic stimulus	Stress	1.2184e-14	2.2181
Leaves	Up	metabolic process	Metabolism	1.53279e-14	1.20879
Leaves	Up	oxidation-reduction process	Metabolism	1.11453e-12	1.66433
Leaves	Up	cellular process	Other	1.39574e-11	1.18756
Leaves	Up	cellular metabolic process	Metabolism	1.73685e-10	1.20915
Leaves	Up	response to light stimulus	Stimulus response	1.983e-10	2.69224
Leaves	Up	response to stimulus	Stimulus response	4.53293e-06	1.32341
Leaves	Up	cellular response to oxidative stress	Stress	9.99318e-06	3.8778
Leaves	Up	organonitrogen compound metabolic process	Metabolism	1.11054e-05	1.24247
Leaves	Up	response to endogenous stimulus	Hormone	1.89952e-05	1.85892
Leaves	Up	response to hormone	Hormone	2.09306e-05	1.86259
Leaves	Up	multicellular organism development	Development	2.18172e-05	1.68009
Leaves	Up	biosynthetic process	Metabolism	6.60935e-05	1.25379
Leaves	Up	response to cytokinin	Hormone	9.53744e-05	3.46961
Leaves	Up	organic substance biosynthetic process	Metabolism	0.000184093	1.25298
Leaves	Up	oligosaccharide metabolic process	Metabolism	0.000213233	3.32942
Leaves	Up	organic substance metabolic process	Metabolism	0.000253672	1.14055
Leaves	Up	protein-chromophore linkage	Photosynthesis	0.000295472	5.7324
Leaves	Up	plastid organization	Photosynthesis	0.000441093	2.57023
Leaves	Up	cellular amide metabolic process	Metabolism	0.000643863	1.57162
Leaves	Up	protein repair	Stress	0.000908322	7.1655
Leaves	Up	developmental process	Development	0.000948248	1.49042
Leaves	Up	cofactor metabolic process	Metabolism	0.00142901	1.81852
Leaves	Up	negative regulation of response to stimulus	Stimulus response	0.0023741	3.10259
Leaves	Up	carbon fixation	Metabolism	0.00286068	5.7324
Leaves	Up	amide biosynthetic process	Metabolism	0.00540995	1.57608
Leaves	Up	multicellular organismal process	Development	0.00630437	1.48502
Leaves	Up	chloroplast rRNA processing	Photosynthesis	0.00657693	6.744
Leaves	Up	small molecule catabolic process	Metabolism	0.00820917	2.32597
Leaves	Down	cellular process	Other	2.19706e-76	1.49753
Leaves	Down	biological process	Other	2.49052e-71	1.37128
Leaves	Down	organic substance metabolic process	Metabolism	8.07119e-51	1.46713
Leaves	Down	cellular metabolic process	Metabolism	1.5941e-48	1.46675
Leaves	Down	primary metabolic process	Metabolism	1.77035e-47	1.47088
Leaves	Down	nitrogen compound metabolic process	Metabolism	6.04656e-47	1.51185
Leaves	Down	macromolecule metabolic process	Metabolism	7.43489e-42	1.50401
Leaves	Down	metabolic process	Metabolism	7.42678e-39	1.35645
Leaves	Down	heterocycle metabolic process	Metabolism	5.18031e-35	1.70857
Leaves	Down	gene expression	Transcription	7.27928e-33	1.78721
Leaves	Down	cellular aromatic compound metabolic process	Metabolism	3.67573e-32	1.66786
Leaves	Down	organic cyclic compound metabolic process	Metabolism	3.31692e-31	1.651
Leaves	Down	RNA metabolic process	Transcription	4.67922e-29	1.76199
Leaves	Down	biological regulation	Other	1.4228e-25	1.5401
Leaves	Down	cellular component organization or biogenesis	Metabolism	6.07086e-23	1.80307
Leaves	Down	macromolecule biosynthetic process	Metabolism	1.70701e-20	1.6433
Leaves	Down	response to stimulus	Stimulus response	2.62826e-20	1.60801
Leaves	Down	ribonucleoprotein complex biogenesis	Chromatin	5.75928e-19	2.94126
Leaves	Down	RNA processing	Metabolism	7.78597e-18	2.44685
Leaves	Down	localization	Transport	2.0733e-16	1.68573
Leaves	Down	biosynthetic process	Metabolism	4.90878e-16	1.46157
Leaves	Down	cellular protein metabolic process	Metabolism	4.83287e-15	1.48523
Leaves	Down	transport	Transport	5.44916e-15	1.67688
Leaves	Down	protein metabolic process	Metabolism	2.02519e-14	1.44293
Leaves	Down	cellular localization	Transport	9.54547e-14	2.25841
Leaves	Down	rRNA metabolic process	Transcription	4.66169e-13	3.47866
Leaves	Down	cellular amide metabolic process	Translation	5.28579e-12	2.01251
Leaves	Down	response to stress	Stress	7.51099e-12	1.68015
Leaves	Down	protein localization	Transport	8.83996e-12	2.20892
Leaves	Down	macromolecule modification	Metabolism	1.5419e-11	1.45751
Leaves	Down	protein folding	Translation	2.42204e-10	3.26247
Leaves	Down	regulation of gene expression	Transcription	2.70129e-10	1.56918
Leaves	Down	translation	Translation	1.76155e-09	2.0678
Leaves	Down	vesicle-mediated transport	Transport	1.01388e-08	2.40607
Leaves	Down	peptide transport	Transport	2.27437e-08	2.02052
Leaves	Down	signaling	Signaling	9.19413e-08	1.61206
Leaves	Down	cell communication	Transport	1.05061e-07	1.57962
Leaves	Down	gene silencing	Transcription	1.32367e-07	3.61476
Leaves	Down	small molecule metabolic process	Metabolism	2.19917e-07	1.659
Leaves	Down	nitrogen compound transport	Transport	5.36414e-07	1.80872
Leaves	Down	nucleocytoplasmic transport	Transport	6.30242e-07	3.77423
Leaves	Down	phosphorus metabolic process	Metabolism	9.88922e-07	1.43209
Leaves	Down	chaperone-mediated protein folding	Translation	2.18382e-06	4.05233
Leaves	Down	phosphorylation	Signaling	4.29847e-06	1.49386
Leaves	Down	carboxylic acid metabolic process	Metabolism	4.90114e-06	1.80389
Leaves	Down	response to heat	Stress	1.01927e-05	3.27587
Leaves	Down	oxoacid metabolic process	Metabolism	1.6754e-05	1.75576
Leaves	Down	starch biosynthetic process	Metabolism	1.86526e-05	6.51645
Leaves	Down	organic acid metabolic process	Metabolism	1.86635e-05	1.75204
Leaves	Down	nucleic acid phosphodiester bond hydrolysis	Metabolism	2.07067e-05	1.85664
Leaves	Down	chromatin organization	Chromatin	3.00655e-05	2.31854
Leaves	Down	cellular amino acid metabolic process	Metabolism	0.000234506	2.0661
Leaves	Down	regulation of gene expression, epigenetic	Transcription	0.000313208	3.18158
Leaves	Down	mRNA metabolic process	Transcription	0.00105799	1.95701
Leaves	Down	DNA metabolic process	Transcription	0.00106484	1.79057
Leaves	Down	import into cell	Transport	0.00109175	4.01012
Leaves	Down	Golgi vesicle transport	Transport	0.00137475	2.6281
Leaves	Down	reproduction	Development	0.00196812	1.70417
Leaves	Down	amino acid activation	Metabolism	0.00223875	3.63584
Leaves	Down	embryo sac development	Development	0.00312696	4.43673
Leaves	Down	reproductive process	Development	0.00312722	1.6896
Leaves	Down	multicellular organismal process	Development	0.0041067	1.52702
Leaves	Down	energy derivation by oxidation of organic compounds	Metabolism	0.00572695	2.65571
Leaves	Down	regulation of transport	Transport	0.00696483	3.10989
Leaves	Down	positive regulation of biological process	Other	0.00869916	1.61559
Roots	Up	biological process	Other	1.37355e-13	1.42254
Roots	Up	phosphorus metabolic process	Metabolism	1.03508e-12	2.62496
Roots	Up	biological regulation	Other	3.69467e-11	1.96673
Roots	Up	protein phosphorylation	Signaling	4.87009e-10	3.02406
Roots	Up	cell communication	Transport	2.38992e-09	2.79299
Roots	Up	cellular process	Other	5.71885e-09	1.45466
Roots	Up	regulation of biological process	Other	5.75314e-09	1.95434
Roots	Up	signaling	Signaling	8.80517e-09	2.83685
Roots	Up	cellular macromolecule metabolic process	Metabolism	2.43085e-08	1.70516
Roots	Up	organic substance metabolic process	Metabolism	4.13422e-08	1.50056
Roots	Up	primary metabolic process	Metabolism	4.74183e-08	1.52065
Roots	Up	response to stimulus	Stimulus response	5.23879e-07	1.98933
Roots	Up	cellular response to organic substance	Stimulus response	6.75009e-07	4.72767
Roots	Up	cellular metabolic process	Metabolism	1.48427e-06	1.46596
Roots	Up	metabolic process	Metabolism	1.88306e-06	1.39422
Roots	Up	macromolecule metabolic process	Metabolism	1.42433e-05	1.5058
Roots	Up	nitrogen compound metabolic process	Metabolism	1.79266e-05	1.48091
Roots	Up	phosphorelay signal transduction system	Signaling	2.47423e-05	12.6326
Roots	Up	macromolecule modification	Metabolism	9.74772e-05	1.82395
Roots	Up	response to hormone	Hormone	0.000208269	3.45539
Roots	Up	response to endogenous stimulus	Hormone	0.000263872	3.40849
Roots	Up	response to cytokinin	Hormone	0.000357538	9.30821
Roots	Up	negative regulation of ion transport	Transport	0.000645649	98.2533
Roots	Up	metal ion transport	Transport	0.00144466	4.37329
Roots	Up	transcription, DNA-templated	Transcription	0.00312763	1.99996
Roots	Up	protein metabolic process	Translation	0.00385001	1.60351
Roots	Up	transmembrane transport	Transport	0.00642547	2.28819
Roots	Down	response to stimulus	Stimulus response	3.42906e-10	1.91687
Roots	Down	response to stress	Stress	1.27754e-08	2.25734
Roots	Down	defense response	Defense	5.68822e-08	3.21804
Roots	Down	biological process	Other	7.55065e-06	1.23255
Roots	Down	response to jasmonic acid	Hormone	0.000108082	9.06084
Roots	Down	oxidation-reduction process	Metabolism	0.000187754	1.93551
Roots	Down	regulation of response to stimulus	Stimulus response	0.000490817	3.56443
Roots	Down	response to wounding	Stress	0.000510746	8.94393
Roots	Down	organic acid metabolic process	Metabolism	0.000712647	2.41751
Roots	Down	response to external biotic stimulus	Defense	0.000827459	3.45037
Roots	Down	small molecule metabolic process	Metabolism	0.00158646	2.02944
Roots	Down	response to oxygen-containing compound	Stress	0.00172932	2.71683
Roots	Down	response to biotic stimulus	Defense	0.00180718	3.28398
Roots	Down	drug metabolic process	Metabolism	0.0019096	2.76341
Roots	Down	cellular process	Other	0.00236294	1.23989
Roots	Down	aminoglycan metabolic process	Metabolism	0.00317257	8.49844
Roots	Down	regulation of signaling	Signaling	0.00468917	4.57702
Roots	Down	cellular transition metal ion homeostasis	Metabolism	0.00482708	5.42201
Roots	Down	drug catabolic process	Metabolism	0.00492898	3.59943
Roots	Down	regulation of cell communication	Transport	0.00530616	4.5253
Roots	Down	immune response	Defense	0.00653347	5.25388

## Sheet: KEGG
Supplementary Table S4 : KEGG pathway enrichment analysis
Organ	Regulation	Term	padj	Ratio
Leaves	Up	Photosynthesis	4.75733e-12	6.03411
Leaves	Up	Metabolic pathways	5.4249e-11	1.71233
Leaves	Up	Carbon fixation in photosynthetic organisms	2.07832e-06	4.18906
Leaves	Up	Photosynthesis - antenna proteins	4.98304e-06	8.5986
Leaves	Up	Carbon metabolism	8.32902e-06	2.50117
Leaves	Up	Biosynthesis of secondary metabolites	1.70194e-05	1.67483
Leaves	Up	MAPK signaling pathway - plant	0.000708527	2.76102
Leaves	Up	Glyoxylate and dicarboxylate metabolism	0.00235362	3.28908
Leaves	Up	Plant hormone signal transduction	0.00523768	2.14965
Leaves	Up	Oxidative phosphorylation	0.0113448	2.40964
Leaves	Up	Ubiquitin mediated proteolysis	0.0165757	2.65389
Leaves	Up	Peroxisome	0.018181	2.8662
Leaves	Up	Glutathione metabolism	0.0268398	2.63992
Leaves	Up	Pentose phosphate pathway	0.0281171	3.25705
Leaves	Up	Terpenoid backbone biosynthesis	0.0303969	3.48592
Leaves	Down	Ribosome biogenesis in eukaryotes	1.4358e-10	5.88151
Leaves	Down	Carbon metabolism	1.38399e-07	2.87518
Leaves	Down	Biosynthesis of amino acids	7.03394e-07	2.95718
Leaves	Down	Metabolic pathways	3.43945e-06	1.55722
Leaves	Down	Aminoacyl-tRNA biosynthesis	2.6659e-05	5.4996
Leaves	Down	Biosynthesis of secondary metabolites	0.000106264	1.66203
Leaves	Down	Glycolysis / Gluconeogenesis	0.000516821	2.91645
Leaves	Down	Purine metabolism	0.0016952	3.40253
Leaves	Down	Alanine, aspartate and glutamate metabolism	0.00181419	4.45569
Leaves	Down	Protein processing in endoplasmic reticulum	0.00866297	2.2915
Leaves	Down	Ribosome	0.0134245	2.00506
Leaves	Down	RNA transport	0.021006	2.43472
Leaves	Down	Glutathione metabolism	0.0290165	2.74377
Leaves	Down	Phosphatidylinositol signaling system	0.0291853	3.52108
Leaves	Down	Glyoxylate and dicarboxylate metabolism	0.0459529	2.89255
Roots	Up	Plant hormone signal transduction	1.5044e-06	7.09607
Roots	Down	Metabolic pathways	1.30717e-07	2.34241
Roots	Down	Biosynthesis of secondary metabolites	8.44566e-05	2.4497
Roots	Down	Amino sugar and nucleotide sugar metabolism	0.000883622	5.09204
Roots	Down	Carbon fixation in photosynthetic organisms	0.00262822	6.63532
Roots	Down	Phenylpropanoid biosynthesis	0.00739297	3.9496
Roots	Down	Taurine and hypotaurine metabolism	0.0320712	14.2185
