# Supplementary material for: Paraburkholderia phytofirmans PsJN colonization of rice endosphere triggers an atypical transcriptomic response compared to rice native Burkholderia s.l. endophytes
Source: Sci Rep. 2023 Jul 3;13:10696. doi: 10.1038/s41598-023-37314-7 (PMC10317989; doi:10.1038/s41598-023-37314-7)
Supplement: Supplementary file 11 — Supplementary Table S5. [file 41598_2023_37314_MOESM11_ESM.xlsx]

## Sheet: PsJNPkBv
Supplementary Table S5: Gene Ontology (GO) terms and Kyoto Encyclopedia of Genes and Genomes (KEGG) pathway enrichment analysis on the different pool of DEGs shared or not among the response to the three endophytic species (as indicated by the label of each sheet)
source	term_name	term_id	adjusted_p_value		term_size	query_size	intersection_size	effective_domain_size	intersections
GO:MF	oxidoreductase activity, acting on a sulfur group of donors, disulfide as acceptor	GO:0016671	0.00022128126729879774		35	579	9	19516	OS05G0404200,OS12G0188700,OS01G0913000,OS02G0639900,OS10G0563600,OS02G0567100,OS01G0963400,OS03G0360700,OS06G0472000
GO:MF	oxidoreductase activity	GO:0016491	0.0032839564695232946		1953	579	91	19516	OS07G0677400,OS04G0688300,OS02G0178800,OS09G0451000,OS02G0703600,OS02G0105400,OS05G0592300,OS02G0578400,OS12G0291100,OS02G0110200,OS06G0196300,OS04G0631100,OS08G0547300,OS01G0935400,OS03G0805600,OS06G0306300,OS01G0602400,OS03G0685000,OS02G0152400,OS08G0105800,OS06G0107700,OS05G0404200,OS02G0190600,OS04G0523000,OS04G0119400,OS09G0492700,OS05G0348100,OS03G0762300,OS12G0188700,OS12G0226900,OS07G0489…
GO:MF	antioxidant activity	GO:0016209	0.004119719798383815		260	579	22	19516	OS07G0677400,OS04G0688300,OS06G0196300,OS06G0306300,OS03G0762300,OS12G0188700,OS02G0537700,OS05G0528000,OS08G0561700,OS01G0913000,OS02G0639900,OS06G0185900,OS02G0567100,OS01G0963400,OS05G0116100,OS08G0522500,OS02G0664000,OS01G0266600,OS05G0323900,OS07G0260300,OS03G0284600,OS04G0556300
GO:MF	peptide-methionine (R)-S-oxide reductase activity	GO:0033743	0.009694864768122391		3	579	3	19516	OS05G0404200,OS03G0360700,OS06G0472000
GO:MF	beta-fructofuranosidase activity	GO:0004564	0.028062200623973035		16	579	5	19516	OS01G0332100,OS01G0966700,OS04G0535600,OS02G0529400,OS02G0550600
GO:MF	glycopeptide alpha-N-acetylgalactosaminidase activity	GO:0033926	0.032011517763274405		9	579	4	19516	OS01G0332100,OS02G0125700,OS02G0529400,OS02G0550600
GO:MF	structural constituent of ribosome	GO:0003735	0.04511123847125088		414	579	27	19516	OS11G0550800,OS05G0568300,OS03G0828100,OS01G0662300,OS02G0754300,OS02G0652600,OS03G0815400,OS03G0265400,OS03G0769100,OS03G0284400,OS01G0805000,OS04G0691600,OS04G0461100,OS03G0125000,OS01G0678600,OS06G0647100,OS12G0124200,OS01G0667100,OS01G0749200,OS03G0196800,OS03G0122200,OS02G0503400,OS11G0425800,OS02G0478600,OS06G0555400,OS05G0565000,OS05G0564800
GO:BP	chloroplast rRNA processing	GO:1901259	0.0002859339579062409	13.6221	17	547	7	18096	OS09G0279500,OS08G0557100,OS09G0565200,OS07G0631900,OS08G0308700,OS02G0115600,OS03G0376600
GO:BP	response to chemical	GO:0042221	0.0003783753915177901	1.76707	1479	547	79	18096	OS07G0677400,OS04G0688300,OS02G0178800,OS09G0451000,OS10G0554200,OS07G0182400,OS05G0568300,OS06G0649000,OS02G0181300,OS03G0815100,OS06G0196300,OS04G0631100,OS03G0765400,OS07G0569100,OS05G0337400,OS04G0463400,OS06G0306300,OS03G0741100,OS09G0279500,OS04G0584600,OS02G0208100,OS02G0126400,OS09G0541000,OS01G0178500,OS03G0762300,OS11G0177400,OS12G0188700,OS01G0884300,OS09G0247700,OS07G0622000,OS02G0729…
GO:BP	response to salt stress	GO:0009651	0.000689763262041705	3.5959	184	547	20	18096	OS09G0451000,OS02G0181300,OS03G0815100,OS09G0279500,OS04G0584600,OS01G0884300,OS08G0440100,OS08G0561700,OS03G0324300,OS10G0563600,OS07G0517100,OS06G0111500,OS10G0154000,OS05G0213500,OS05G0323900,OS06G0199500,OS02G0768600,OS02G0122000,OS09G0394900,OS03G0109600
GO:BP	NADH dehydrogenase complex (plastoquinone) assembly	GO:0010258	0.0007120836884451023	33.0823	4	547	4	18096	OS04G0635700,OS01G0882500,OS04G0539000,OS01G0959900
GO:BP	response to osmotic stress	GO:0006970	0.0011463912660625894	3.35617	207	547	21	18096	OS09G0451000,OS02G0181300,OS03G0815100,OS09G0279500,OS04G0584600,OS01G0884300,OS08G0440100,OS08G0561700,OS03G0324300,OS03G0229500,OS10G0563600,OS07G0517100,OS06G0111500,OS10G0154000,OS05G0213500,OS05G0323900,OS06G0199500,OS02G0768600,OS02G0122000,OS09G0394900,OS03G0109600
GO:BP	photosynthesis	GO:0015979	0.0030504039034054955	3.15785	220	547	21	18096	OS02G0578400,OS12G0291100,OS07G0673550,OS08G0504500,OS09G0481200,OS02G0152400,OS06G0107700,OS04G0523000,OS05G0401300,OS06G0705100,OS07G0489800,OS07G0105600,OS07G0556200,OS02G0103800,OS01G0805300,OS05G0526200,OS02G0610800,OS03G0267300,OS12G0564400,OS09G0296800,OS05G0568900
GO:BP	oxidation-reduction process	GO:0055114	0.003542579935902875	1.55885	2101	547	99	18096	OS07G0677400,OS04G0688300,OS02G0178800,OS09G0451000,OS02G0703600,OS02G0105400,OS05G0592300,OS02G0578400,OS12G0291100,OS02G0110200,OS06G0196300,OS04G0631100,OS08G0547300,OS01G0935400,OS09G0481200,OS03G0805600,OS06G0306300,OS01G0602400,OS03G0685000,OS02G0152400,OS08G0105800,OS06G0107700,OS05G0404200,OS02G0190600,OS04G0523000,OS04G0119400,OS09G0492700,OS05G0348100,OS03G0762300,OS12G0188700,OS12G0226…
GO:BP	cellular response to chemical stimulus	GO:0070887	0.004193274544946302	1.96966	823	547	49	18096	OS07G0677400,OS04G0688300,OS09G0451000,OS07G0182400,OS02G0181300,OS06G0196300,OS04G0631100,OS07G0569100,OS04G0463400,OS06G0306300,OS04G0584600,OS02G0126400,OS01G0178500,OS03G0762300,OS12G0188700,OS09G0247700,OS07G0622000,OS02G0729400,OS02G0537700,OS03G0227700,OS05G0528000,OS08G0561700,OS01G0913000,OS03G0324300,OS01G0675700,OS02G0639900,OS06G0185900,OS03G0324200,OS10G0563600,OS02G0567100,OS01G0963…
GO:BP	cellular oxidant detoxification	GO:0098869	0.02006774472937679	2.71571	268	547	22	18096	OS07G0677400,OS04G0688300,OS06G0196300,OS06G0306300,OS03G0762300,OS12G0188700,OS02G0537700,OS05G0528000,OS08G0561700,OS01G0913000,OS02G0639900,OS06G0185900,OS02G0567100,OS01G0963400,OS05G0116100,OS08G0522500,OS02G0664000,OS01G0266600,OS05G0323900,OS07G0260300,OS03G0284600,OS04G0556300
GO:BP	response to oxidative stress	GO:0006979	0.030026707699129244	2.46148	336	547	25	18096	OS07G0677400,OS04G0688300,OS09G0451000,OS06G0196300,OS06G0306300,OS05G0404200,OS03G0762300,OS12G0188700,OS02G0537700,OS08G0440100,OS08G0561700,OS01G0913000,OS02G0639900,OS06G0185900,OS10G0563600,OS02G0567100,OS01G0963400,OS07G0517100,OS03G0360700,OS06G0472000,OS08G0522500,OS02G0664000,OS01G0266600,OS05G0323900,OS04G0556300
GO:BP	cellular response to toxic substance	GO:0097237	0.03703266690287473		279	547	22	18096	OS07G0677400,OS04G0688300,OS06G0196300,OS06G0306300,OS03G0762300,OS12G0188700,OS02G0537700,OS05G0528000,OS08G0561700,OS01G0913000,OS02G0639900,OS06G0185900,OS02G0567100,OS01G0963400,OS05G0116100,OS08G0522500,OS02G0664000,OS01G0266600,OS05G0323900,OS07G0260300,OS03G0284600,OS04G0556300
GO:BP	cellular detoxification	GO:1990748	0.03703266690287473		279	547	22	18096	OS07G0677400,OS04G0688300,OS06G0196300,OS06G0306300,OS03G0762300,OS12G0188700,OS02G0537700,OS05G0528000,OS08G0561700,OS01G0913000,OS02G0639900,OS06G0185900,OS02G0567100,OS01G0963400,OS05G0116100,OS08G0522500,OS02G0664000,OS01G0266600,OS05G0323900,OS07G0260300,OS03G0284600,OS04G0556300
GO:BP	cellular response to oxidative stress	GO:0034599	0.04232910824802977	4.28123	85	547	11	18096	OS09G0451000,OS06G0196300,OS12G0188700,OS08G0561700,OS01G0913000,OS02G0639900,OS10G0563600,OS02G0567100,OS01G0963400,OS01G0266600,OS05G0323900
GO:BP	response to water deprivation	GO:0009414	0.047703815843570745	3.45636	134	547	14	18096	OS02G0178800,OS02G0181300,OS03G0815100,OS04G0631100,OS03G0741100,OS09G0279500,OS04G0584600,OS09G0541000,OS01G0884300,OS08G0440100,OS06G0111500,OS05G0213500,OS09G0394900,OS04G0635800
GO:CC	chloroplast	GO:0009507	6.092840817422413e-32		1517	579	143	18385	OS03G0133300,OS01G0111100,OS04G0635700,OS11G0550800,OS05G0568300,OS02G0578400,OS06G0484500,OS12G0291100,OS03G0828100,OS02G0110200,OS06G0196300,OS04G0631100,OS07G0520800,OS03G0170500,OS06G0264800,OS02G0754300,OS05G0337400,OS02G0731600,OS09G0481200,OS07G0191500,OS09G0279500,OS03G0685000,OS05G0186000,OS06G0107700,OS02G0208100,OS05G0404200,OS02G0190600,OS04G0523000,OS03G0815400,OS04G0119400,OS03G0265…
GO:CC	plastid	GO:0009536	8.295244404541441e-32		1559	579	145	18385	OS03G0133300,OS01G0111100,OS04G0635700,OS11G0550800,OS05G0568300,OS02G0578400,OS06G0484500,OS12G0291100,OS03G0828100,OS02G0110200,OS06G0196300,OS04G0631100,OS07G0520800,OS03G0170500,OS06G0264800,OS02G0754300,OS05G0337400,OS02G0731600,OS09G0481200,OS07G0191500,OS09G0279500,OS03G0685000,OS02G0152400,OS05G0186000,OS06G0107700,OS02G0208100,OS05G0404200,OS02G0190600,OS04G0523000,OS03G0815400,OS04G0119…
GO:CC	plastid part	GO:0044435	1.384846739739324e-22		845	579	90	18385	OS03G0133300,OS04G0635700,OS02G0578400,OS06G0484500,OS02G0110200,OS06G0196300,OS04G0631100,OS07G0520800,OS03G0170500,OS06G0264800,OS02G0754300,OS05G0337400,OS02G0731600,OS09G0481200,OS09G0279500,OS05G0186000,OS06G0107700,OS02G0208100,OS03G0815400,OS04G0119400,OS03G0265400,OS02G0307800,OS03G0769100,OS03G0284400,OS07G0489800,OS08G0557100,OS04G0691600,OS01G0882500,OS07G0105600,OS02G0729400,OS01G0589…
GO:CC	chloroplast part	GO:0044434	1.4917460913055063e-22		829	579	89	18385	OS03G0133300,OS04G0635700,OS02G0578400,OS06G0484500,OS02G0110200,OS06G0196300,OS04G0631100,OS07G0520800,OS03G0170500,OS06G0264800,OS02G0754300,OS05G0337400,OS02G0731600,OS09G0481200,OS09G0279500,OS05G0186000,OS06G0107700,OS02G0208100,OS03G0815400,OS04G0119400,OS03G0265400,OS02G0307800,OS03G0284400,OS07G0489800,OS08G0557100,OS04G0691600,OS01G0882500,OS07G0105600,OS02G0729400,OS01G0589800,OS02G0537…
GO:CC	thylakoid	GO:0009579	7.488876867062191e-17		398	579	53	18385	OS02G0578400,OS06G0484500,OS07G0673550,OS08G0504500,OS06G0196300,OS04G0631100,OS03G0170500,OS06G0264800,OS05G0337400,OS02G0731600,OS09G0481200,OS09G0279500,OS06G0107700,OS04G0523000,OS03G0265400,OS02G0307800,OS05G0401300,OS07G0489800,OS08G0557100,OS04G0691600,OS01G0882500,OS06G0663800,OS07G0105600,OS02G0729400,OS01G0589800,OS09G0565200,OS12G0498500,OS04G0539000,OS01G0959900,OS07G0556200,OS02G0125…
GO:CC	thylakoid part	GO:0044436	8.906293415711985e-16		334	579	47	18385	OS02G0578400,OS06G0484500,OS07G0673550,OS08G0504500,OS06G0196300,OS04G0631100,OS03G0170500,OS06G0264800,OS05G0337400,OS02G0731600,OS09G0481200,OS09G0279500,OS06G0107700,OS04G0523000,OS03G0265400,OS02G0307800,OS05G0401300,OS07G0489800,OS08G0557100,OS01G0882500,OS06G0663800,OS07G0105600,OS02G0729400,OS01G0589800,OS09G0565200,OS12G0498500,OS04G0539000,OS01G0959900,OS07G0556200,OS02G0125700,OS07G0631…
GO:CC	photosynthetic membrane	GO:0034357	1.429970770259165e-15		324	579	46	18385	OS02G0578400,OS06G0484500,OS07G0673550,OS08G0504500,OS06G0196300,OS04G0631100,OS03G0170500,OS06G0264800,OS05G0337400,OS02G0731600,OS09G0481200,OS09G0279500,OS06G0107700,OS04G0523000,OS03G0265400,OS02G0307800,OS05G0401300,OS07G0489800,OS08G0557100,OS01G0882500,OS07G0105600,OS02G0729400,OS01G0589800,OS09G0565200,OS12G0498500,OS04G0539000,OS01G0959900,OS07G0556200,OS02G0125700,OS07G0631900,OS02G0751…
GO:CC	thylakoid membrane	GO:0042651	2.014540768895342e-15		313	579	45	18385	OS02G0578400,OS06G0484500,OS08G0504500,OS06G0196300,OS04G0631100,OS03G0170500,OS06G0264800,OS05G0337400,OS02G0731600,OS09G0481200,OS09G0279500,OS06G0107700,OS04G0523000,OS03G0265400,OS02G0307800,OS05G0401300,OS07G0489800,OS08G0557100,OS01G0882500,OS07G0105600,OS02G0729400,OS01G0589800,OS09G0565200,OS12G0498500,OS04G0539000,OS01G0959900,OS07G0556200,OS02G0125700,OS07G0631900,OS02G0751600,OS02G0103…
GO:CC	plastid thylakoid	GO:0031976	1.5116346459484905e-13		321	579	43	18385	OS02G0578400,OS06G0484500,OS06G0196300,OS04G0631100,OS03G0170500,OS06G0264800,OS05G0337400,OS02G0731600,OS09G0481200,OS09G0279500,OS06G0107700,OS03G0265400,OS02G0307800,OS07G0489800,OS08G0557100,OS04G0691600,OS01G0882500,OS07G0105600,OS02G0729400,OS01G0589800,OS09G0565200,OS12G0498500,OS04G0539000,OS01G0959900,OS07G0556200,OS02G0125700,OS07G0631900,OS02G0751600,OS02G0103800,OS05G0490900,OS01G0805…
GO:CC	chloroplast thylakoid	GO:0009534	1.5116346459484905e-13		321	579	43	18385	OS02G0578400,OS06G0484500,OS06G0196300,OS04G0631100,OS03G0170500,OS06G0264800,OS05G0337400,OS02G0731600,OS09G0481200,OS09G0279500,OS06G0107700,OS03G0265400,OS02G0307800,OS07G0489800,OS08G0557100,OS04G0691600,OS01G0882500,OS07G0105600,OS02G0729400,OS01G0589800,OS09G0565200,OS12G0498500,OS04G0539000,OS01G0959900,OS07G0556200,OS02G0125700,OS07G0631900,OS02G0751600,OS02G0103800,OS05G0490900,OS01G0805…
GO:CC	chloroplast thylakoid membrane	GO:0009535	1.513864065848717e-13		279	579	40	18385	OS02G0578400,OS06G0484500,OS06G0196300,OS04G0631100,OS03G0170500,OS06G0264800,OS05G0337400,OS02G0731600,OS09G0481200,OS09G0279500,OS06G0107700,OS03G0265400,OS02G0307800,OS07G0489800,OS08G0557100,OS01G0882500,OS07G0105600,OS02G0729400,OS01G0589800,OS09G0565200,OS12G0498500,OS04G0539000,OS01G0959900,OS07G0556200,OS02G0125700,OS07G0631900,OS02G0751600,OS02G0103800,OS05G0490900,OS10G0580800,OS05G0526…
GO:CC	plastid thylakoid membrane	GO:0055035	1.513864065848717e-13		279	579	40	18385	OS02G0578400,OS06G0484500,OS06G0196300,OS04G0631100,OS03G0170500,OS06G0264800,OS05G0337400,OS02G0731600,OS09G0481200,OS09G0279500,OS06G0107700,OS03G0265400,OS02G0307800,OS07G0489800,OS08G0557100,OS01G0882500,OS07G0105600,OS02G0729400,OS01G0589800,OS09G0565200,OS12G0498500,OS04G0539000,OS01G0959900,OS07G0556200,OS02G0125700,OS07G0631900,OS02G0751600,OS02G0103800,OS05G0490900,OS10G0580800,OS05G0526…
GO:CC	cytoplasmic part	GO:0044444	3.576275309966361e-13		5706	579	269	18385	OS02G0178800,OS03G0133300,OS05G0496100,OS01G0111100,OS11G0112000,OS04G0635700,OS02G0703600,OS11G0550800,OS06G0699800,OS05G0568300,OS02G0578400,OS06G0484500,OS01G0332100,OS12G0291100,OS03G0828100,OS04G0429800,OS02G0110200,OS06G0196300,OS04G0631100,OS07G0520800,OS03G0170500,OS06G0264800,OS02G0754300,OS05G0337400,OS02G0731600,OS07G0680900,OS01G0256500,OS09G0481200,OS07G0191500,OS04G0463400,OS09G0279…
GO:CC	cytoplasm	GO:0005737	5.979843541691446e-11		7312	579	315	18385	OS02G0178800,OS03G0133300,OS05G0496100,OS01G0111100,OS11G0112000,OS01G0123700,OS04G0635700,OS02G0703600,OS02G0105400,OS02G0787300,OS11G0550800,OS06G0699800,OS05G0568300,OS02G0578400,OS06G0484500,OS01G0332100,OS12G0291100,OS12G0520200,OS03G0828100,OS03G0120400,OS04G0462500,OS04G0429800,OS02G0110200,OS06G0196300,OS04G0631100,OS07G0520800,OS03G0170500,OS06G0264800,OS02G0754300,OS05G0337400,OS02G0731…
GO:CC	plastid stroma	GO:0009532	1.0023915211111864e-10		418	579	45	18385	OS03G0133300,OS04G0635700,OS07G0520800,OS02G0754300,OS05G0337400,OS09G0279500,OS05G0186000,OS06G0107700,OS03G0815400,OS04G0119400,OS03G0265400,OS03G0769100,OS03G0284400,OS04G0691600,OS02G0537700,OS03G0125000,OS01G0678600,OS09G0249900,OS11G0521500,OS07G0570700,OS08G0561700,OS02G0103800,OS03G0196800,OS06G0146400,OS08G0360100,OS03G0655700,OS07G0461900,OS10G0563600,OS01G0805300,OS10G0580800,OS05G0526…
GO:CC	chloroplast stroma	GO:0009570	1.5848724221707637e-10		407	579	44	18385	OS03G0133300,OS04G0635700,OS07G0520800,OS02G0754300,OS05G0337400,OS09G0279500,OS05G0186000,OS06G0107700,OS03G0815400,OS04G0119400,OS03G0265400,OS03G0284400,OS04G0691600,OS02G0537700,OS03G0125000,OS01G0678600,OS09G0249900,OS11G0521500,OS07G0570700,OS08G0561700,OS02G0103800,OS03G0196800,OS06G0146400,OS08G0360100,OS03G0655700,OS07G0461900,OS10G0563600,OS01G0805300,OS10G0580800,OS05G0526200,OS06G0360…
GO:CC	plastid envelope	GO:0009526	8.182247092692316e-10		345	579	39	18385	OS02G0110200,OS02G0754300,OS05G0337400,OS09G0481200,OS09G0279500,OS05G0186000,OS02G0208100,OS03G0815400,OS04G0119400,OS03G0284400,OS04G0691600,OS01G0882500,OS03G0125000,OS01G0678600,OS09G0249900,OS11G0521500,OS08G0440100,OS04G0405100,OS07G0597100,OS08G0484800,OS01G0730800,OS10G0563600,OS12G0615400,OS10G0580800,OS03G0194500,OS01G0776700,OS04G0553000,OS05G0526200,OS06G0360300,OS09G0513000,OS03G0695…
GO:CC	chloroplast envelope	GO:0009941	1.2732305561335442e-9		334	579	38	18385	OS02G0110200,OS02G0754300,OS05G0337400,OS09G0481200,OS09G0279500,OS05G0186000,OS02G0208100,OS03G0815400,OS04G0119400,OS03G0284400,OS04G0691600,OS01G0882500,OS03G0125000,OS01G0678600,OS09G0249900,OS11G0521500,OS08G0440100,OS04G0405100,OS07G0597100,OS08G0484800,OS01G0730800,OS10G0563600,OS12G0615400,OS10G0580800,OS03G0194500,OS01G0776700,OS04G0553000,OS05G0526200,OS06G0360300,OS09G0513000,OS03G0695…
GO:CC	intracellular membrane-bounded organelle	GO:0043231	1.9381854177194668e-8		8720	579	350	18385	OS02G0178800,OS03G0133300,OS09G0455300,OS01G0111100,OS11G0112000,OS05G0537100,OS01G0123700,OS03G0364700,OS07G0182400,OS04G0635700,OS02G0703600,OS02G0731700,OS11G0550800,OS05G0568300,OS02G0578400,OS03G0769800,OS06G0484500,OS01G0332100,OS12G0291100,OS06G0649000,OS03G0764100,OS03G0828100,OS02G0181300,OS04G0462500,OS02G0110200,OS03G0815100,OS09G0509700,OS06G0196300,OS04G0645700,OS04G0631100,OS03G0765…
GO:CC	membrane-bounded organelle	GO:0043227	2.3361786872024938e-8		8827	579	353	18385	OS02G0178800,OS03G0133300,OS09G0455300,OS01G0111100,OS11G0112000,OS05G0537100,OS01G0123700,OS03G0364700,OS07G0182400,OS04G0635700,OS02G0703600,OS02G0731700,OS11G0550800,OS06G0699800,OS05G0568300,OS02G0578400,OS03G0769800,OS06G0484500,OS01G0332100,OS12G0291100,OS06G0649000,OS03G0764100,OS03G0828100,OS02G0181300,OS04G0462500,OS02G0110200,OS03G0815100,OS09G0509700,OS06G0196300,OS04G0645700,OS04G0631…
GO:CC	intracellular organelle	GO:0043229	6.890715894624732e-8		9376	579	368	18385	OS02G0178800,OS03G0133300,OS09G0455300,OS01G0111100,OS11G0112000,OS05G0537100,OS01G0123700,OS03G0364700,OS07G0182400,OS04G0635700,OS02G0703600,OS02G0731700,OS11G0550800,OS06G0699800,OS05G0568300,OS02G0578400,OS03G0769800,OS06G0484500,OS01G0332100,OS12G0291100,OS06G0649000,OS03G0764100,OS03G0828100,OS02G0181300,OS04G0462500,OS02G0110200,OS03G0815100,OS09G0509700,OS06G0196300,OS04G0645700,OS04G0631…
GO:CC	organelle	GO:0043226	8.692763559556482e-8		9390	579	368	18385	OS02G0178800,OS03G0133300,OS09G0455300,OS01G0111100,OS11G0112000,OS05G0537100,OS01G0123700,OS03G0364700,OS07G0182400,OS04G0635700,OS02G0703600,OS02G0731700,OS11G0550800,OS06G0699800,OS05G0568300,OS02G0578400,OS03G0769800,OS06G0484500,OS01G0332100,OS12G0291100,OS06G0649000,OS03G0764100,OS03G0828100,OS02G0181300,OS04G0462500,OS02G0110200,OS03G0815100,OS09G0509700,OS06G0196300,OS04G0645700,OS04G0631…
GO:CC	organelle subcompartment	GO:0031984	1.7285084553955407e-7		522	579	45	18385	OS02G0578400,OS06G0484500,OS06G0196300,OS04G0631100,OS03G0170500,OS06G0264800,OS05G0337400,OS02G0731600,OS09G0481200,OS09G0279500,OS06G0107700,OS03G0265400,OS02G0307800,OS07G0489800,OS08G0557100,OS04G0691600,OS01G0882500,OS07G0105600,OS02G0729400,OS01G0589800,OS09G0565200,OS12G0498500,OS04G0539000,OS01G0959900,OS07G0556200,OS02G0125700,OS07G0631900,OS02G0751600,OS02G0103800,OS05G0490900,OS01G0805…
GO:CC	intracellular part	GO:0044424	3.0467546745638836e-7		11203	579	420	18385	OS02G0178800,OS03G0133300,OS09G0455300,OS05G0496100,OS01G0111100,OS11G0112000,OS05G0537100,OS01G0123700,OS03G0364700,OS07G0182400,OS04G0635700,OS02G0703600,OS02G0731700,OS02G0105400,OS02G0787300,OS11G0550800,OS06G0699800,OS05G0568300,OS02G0578400,OS03G0769800,OS06G0484500,OS01G0332100,OS12G0291100,OS07G0673550,OS08G0504500,OS12G0520200,OS06G0649000,OS03G0764100,OS03G0828100,OS02G0181300,OS03G0120…
GO:CC	intracellular	GO:0005622	3.7518592372982603e-7		11422	579	426	18385	OS02G0178800,OS03G0133300,OS09G0455300,OS01G0892800,OS05G0496100,OS01G0111100,OS11G0112000,OS05G0537100,OS01G0123700,OS03G0364700,OS07G0182400,OS04G0635700,OS01G0848700,OS02G0703600,OS02G0731700,OS02G0105400,OS02G0787300,OS11G0550800,OS06G0699800,OS05G0568300,OS02G0578400,OS03G0769800,OS06G0484500,OS01G0332100,OS12G0291100,OS07G0673550,OS08G0504500,OS12G0520200,OS06G0649000,OS03G0764100,OS03G0828…
GO:CC	envelope	GO:0031975	0.000020339601723051326		737	579	51	18385	OS11G0112000,OS05G0568300,OS02G0110200,OS03G0765400,OS02G0754300,OS05G0337400,OS09G0481200,OS09G0279500,OS05G0186000,OS02G0208100,OS03G0815400,OS04G0119400,OS01G0588200,OS03G0284400,OS04G0691600,OS01G0882500,OS03G0125000,OS01G0678600,OS09G0249900,OS11G0521500,OS08G0440100,OS03G0772800,OS04G0405100,OS07G0597100,OS08G0484800,OS09G0560300,OS09G0382500,OS01G0730800,OS10G0563600,OS12G0615400,OS10G0580…
GO:CC	organelle envelope	GO:0031967	0.000020339601723051326		737	579	51	18385	OS11G0112000,OS05G0568300,OS02G0110200,OS03G0765400,OS02G0754300,OS05G0337400,OS09G0481200,OS09G0279500,OS05G0186000,OS02G0208100,OS03G0815400,OS04G0119400,OS01G0588200,OS03G0284400,OS04G0691600,OS01G0882500,OS03G0125000,OS01G0678600,OS09G0249900,OS11G0521500,OS08G0440100,OS03G0772800,OS04G0405100,OS07G0597100,OS08G0484800,OS09G0560300,OS09G0382500,OS01G0730800,OS10G0563600,OS12G0615400,OS10G0580…
GO:CC	intracellular organelle part	GO:0044446	0.00019170370740416		4018	579	175	18385	OS02G0178800,OS03G0133300,OS11G0112000,OS04G0635700,OS02G0703600,OS05G0568300,OS02G0578400,OS06G0484500,OS02G0110200,OS06G0196300,OS04G0631100,OS03G0765400,OS07G0520800,OS03G0170500,OS06G0264800,OS02G0754300,OS05G0337400,OS02G0731600,OS09G0481200,OS04G0463400,OS09G0279500,OS05G0186000,OS06G0107700,OS02G0208100,OS04G0462600,OS02G0652600,OS12G0605800,OS03G0815400,OS04G0119400,OS03G0265400,OS02G0307…
GO:CC	organelle part	GO:0044422	0.0002081924133672269		4023	579	175	18385	OS02G0178800,OS03G0133300,OS11G0112000,OS04G0635700,OS02G0703600,OS05G0568300,OS02G0578400,OS06G0484500,OS02G0110200,OS06G0196300,OS04G0631100,OS03G0765400,OS07G0520800,OS03G0170500,OS06G0264800,OS02G0754300,OS05G0337400,OS02G0731600,OS09G0481200,OS04G0463400,OS09G0279500,OS05G0186000,OS06G0107700,OS02G0208100,OS04G0462600,OS02G0652600,OS12G0605800,OS03G0815400,OS04G0119400,OS03G0265400,OS02G0307…
GO:CC	membrane protein complex	GO:0098796	0.000873274234622059		592	579	40	18385	OS02G0578400,OS07G0673550,OS08G0504500,OS09G0481200,OS06G0107700,OS04G0523000,OS05G0401300,OS01G0588200,OS07G0489800,OS07G0105600,OS12G0498500,OS04G0270200,OS03G0772800,OS04G0405100,OS02G0103800,OS09G0560300,OS09G0382500,OS01G0805300,OS01G0960000,OS08G0161700,OS03G0194500,OS04G0553000,OS01G0781000,OS03G0711500,OS01G0626200,OS07G0622900,OS03G0855600,OS03G0360500,OS10G0154000,OS05G0533700,OS05G0536…
GO:CC	photosystem II oxygen evolving complex	GO:0009654	0.005402600879055187		30	579	7	18385	OS02G0578400,OS08G0504500,OS04G0523000,OS05G0401300,OS07G0105600,OS01G0805300,OS12G0564400
GO:CC	oxidoreductase complex	GO:1990204	0.010366884786213358		130	579	14	18385	OS02G0578400,OS08G0504500,OS04G0523000,OS05G0401300,OS07G0105600,OS09G0560300,OS09G0382500,OS01G0805300,OS08G0161700,OS04G0390000,OS05G0533700,OS07G0680300,OS12G0564400,OS12G0183100
GO:CC	cell part	GO:0044464	0.013758776601549538		13779	579	472	18385	OS06G0109200,OS04G0688300,OS02G0178800,OS03G0133300,OS06G0696600,OS09G0455300,OS01G0892800,OS05G0496100,OS01G0111100,OS11G0112000,OS05G0537100,OS01G0123700,OS04G0604200,OS05G0375400,OS03G0364700,OS07G0182400,OS04G0635700,OS01G0848700,OS02G0703600,OS02G0731700,OS02G0105400,OS02G0787300,OS11G0550800,OS03G0281500,OS06G0699800,OS05G0568300,OS02G0578400,OS03G0769800,OS01G0837000,OS06G0484500,OS01G0332…
GO:CC	cell	GO:0005623	0.016603343039298158		13830	579	473	18385	OS06G0109200,OS04G0688300,OS02G0178800,OS03G0133300,OS06G0696600,OS09G0455300,OS01G0892800,OS05G0496100,OS01G0111100,OS11G0112000,OS05G0537100,OS01G0123700,OS04G0604200,OS05G0375400,OS03G0364700,OS07G0182400,OS04G0635700,OS01G0848700,OS02G0703600,OS02G0731700,OS02G0105400,OS02G0787300,OS11G0550800,OS03G0281500,OS06G0699800,OS05G0568300,OS02G0578400,OS03G0769800,OS01G0837000,OS06G0484500,OS01G0332…
GO:CC	endopeptidase Clp complex	GO:0009368	0.045332881083881504		11	579	4	18385	OS10G0580800,OS01G0271400,OS06G0136800,OS03G0344900

## Sheet: PkPsJN
source	term_name	term_id	adjusted_p_value		term_size	query_size	intersection_size	effective_domain_size	intersections
GO:CC	cytoplasm	GO:0005737	0.00006731024579081277	1.35775	7312	300	162	18385	OS07G0694300,OS01G0742300,OS03G0225100,OS01G0905200,OS12G0204500,OS02G0673500,OS01G0760000,OS04G0118700,OS04G0530900,OS02G0167300,OS03G0645200,OS04G0306750,OS04G0106400,OS11G0195500,OS03G0268600,OS07G0546600,OS03G0237100,OS04G0570800,OS08G0532300,OS08G0445700,OS01G0703600,OS03G0300000,OS02G0790500,OS08G0119500,OS01G0853000,OS02G0202200,OS07G0196200,OS05G0349500,OS05G0141700,OS09G0442900,OS04G0676…
GO:CC	mitochondrial respiratory chain complex I	GO:0005747	0.0019408633167222178	9.1273	47	300	7	18385	OS10G0551600,OS04G0310500,OS03G0295500,OS03G0129900,OS06G0714100,OS03G0313000,OS07G0585800
GO:CC	respiratory chain complex I	GO:0045271	0.0033791412574135753	8.41144	51	300	7	18385	OS10G0551600,OS04G0310500,OS03G0295500,OS03G0129900,OS06G0714100,OS03G0313000,OS07G0585800
GO:CC	NADH dehydrogenase complex	GO:0030964	0.004375390190300769	8.09403	53	300	7	18385	OS10G0551600,OS04G0310500,OS03G0295500,OS03G0129900,OS06G0714100,OS03G0313000,OS07G0585800
GO:CC	mitochondrial respirasome	GO:0005746	0.009859375874157543	6.05267	81	300	8	18385	OS10G0551600,OS04G0310500,OS03G0295500,OS03G0129900,OS06G0714100,OS03G0313000,OS07G0585800,OS04G0398500
GO:CC	respiratory chain complex	GO:0098803	0.01516013702193954	5.70078	86	300	8	18385	OS10G0551600,OS04G0310500,OS03G0295500,OS03G0129900,OS06G0714100,OS03G0313000,OS07G0585800,OS04G0398500
GO:CC	cytoplasmic part	GO:0044444	0.01739535353638242	1.33178	5706	300	124	18385	OS07G0694300,OS01G0742300,OS01G0905200,OS12G0204500,OS02G0673500,OS04G0118700,OS04G0530900,OS04G0306750,OS04G0106400,OS03G0268600,OS07G0546600,OS03G0237100,OS04G0570800,OS08G0445700,OS01G0703600,OS03G0300000,OS02G0790500,OS01G0853000,OS02G0202200,OS07G0196200,OS05G0349500,OS05G0141700,OS09G0442900,OS04G0676100,OS01G0170000,OS09G0514600,OS03G0851200,OS08G0549300,OS01G0256600,OS01G0128300,OS10G0566…
GO:CC	membrane protein complex	GO:0098796	0.02188226105901291	2.38094	592	300	23	18385	OS08G0119800,OS01G0703600,OS07G0196200,OS04G0117100,OS10G0551600,OS03G0626200,OS03G0213100,OS02G0550100,OS06G0160400,OS04G0310500,OS03G0295500,OS11G0104050,OS02G0565200,OS04G0679100,OS03G0129900,OS06G0714100,OS12G0566400,OS10G0184300,OS03G0313000,OS07G0585800,OS04G0398500,OS02G0820700,OS09G0347700
GO:CC	organelle membrane	GO:0031090	0.049227522036356046	1.79838	1329	300	39	18385	OS04G0570800,OS03G0300000,OS01G0128300,OS01G0858900,OS04G0117100,OS10G0551600,OS03G0626200,OS01G0210500,OS06G0708300,OS03G0213100,OS02G0550100,OS02G0608900,OS06G0160400,OS04G0310500,OS06G0687900,OS03G0295500,OS01G0835900,OS06G0715500,OS03G0405100,OS04G0597000,OS11G0104050,OS02G0565200,OS04G0679100,OS07G0632700,OS03G0129900,OS07G0558800,OS06G0714100,OS12G0566400,OS02G0535000,OS10G0184300,OS01G0106…
KEGG	Oxidative phosphorylation	KEGG:00190	0.012141379940582038	3.93613	113	69	9	3410	OS02G0550100,OS04G0310500,OS04G0687100,OS03G0295500,OS07G0222800,OS06G0714100,OS03G0313000,OS07G0585800,OS04G0398500

## Sheet: BvPsJN
source	term_name	term_id	adjusted_p_value	term_size	query_size	intersection_size	effective_domain_size	intersections
GO:MF	cytochrome-c peroxidase activity	GO:0004130	0.0012275717845634897	11	474	5	19516	OS08G0522400,OS04G0602100,OS02G0553200,OS04G0434800,OS08G0549100
GO:MF	vitamin B6 binding	GO:0070279	0.009297830222001886	116	474	12	19516	OS01G0814800,OS10G0484700,OS05G0429000,OS04G0614700,OS06G0345200,OS01G0978100,OS06G0611900,OS01G0711400,OS03G0720300,OS03G0713000,OS04G0165700,OS03G0376100
GO:MF	pyridoxal phosphate binding	GO:0030170	0.009297830222001886	116	474	12	19516	OS01G0814800,OS10G0484700,OS05G0429000,OS04G0614700,OS06G0345200,OS01G0978100,OS06G0611900,OS01G0711400,OS03G0720300,OS03G0713000,OS04G0165700,OS03G0376100
GO:MF	vitamin binding	GO:0019842	0.02797772210036224	171	474	14	19516	OS01G0814800,OS10G0484700,OS05G0429000,OS12G0534200,OS02G0581500,OS04G0614700,OS06G0345200,OS01G0978100,OS06G0611900,OS01G0711400,OS03G0720300,OS03G0713000,OS04G0165700,OS03G0376100
GO:BP	photosynthesis	GO:0015979	8.747452112579146e-13	220	458	32	18096	OS03G0333400,OS12G0291400,OS12G0274700,OS03G0778100,OS01G0814800,OS03G0747700,OS01G0773700,OS07G0435300,OS03G0563300,OS03G0190100,OS12G0292400,OS02G0638300,OS09G0439500,OS08G0276100,OS02G0744000,OS03G0414400,OS06G0326400,OS10G0524300,OS08G0347500,OS03G0118600,OS07G0513000,OS03G0169100,OS06G0729650,OS05G0481000,OS07G0558500,OS01G0798500,OS08G0463900,OS08G0526300,OS03G0792400,OS04G0459900,OS06G0725…
GO:BP	photosynthesis, light reaction	GO:0019684	1.731971258488617e-8	107	458	19	18096	OS03G0333400,OS03G0747700,OS01G0773700,OS03G0190100,OS09G0439500,OS08G0276100,OS02G0744000,OS10G0524300,OS03G0118600,OS07G0513000,OS05G0481000,OS07G0558500,OS01G0798500,OS08G0463900,OS08G0526300,OS03G0792400,OS04G0459900,OS06G0725900,OS02G0117100
GO:BP	response to light stimulus	GO:0009416	0.00019216581012998835	346	458	27	18096	OS03G0333400,OS01G0757200,OS01G0814800,OS03G0659200,OS03G0790600,OS01G0221100,OS04G0540200,OS01G0176700,OS01G0566100,OS09G0439500,OS05G0552100,OS04G0488600,OS02G0178100,OS06G0667100,OS08G0242800,OS01G0102900,OS09G0240200,OS08G0242700,OS10G0508100,OS03G0792400,OS03G0752100,OS03G0131200,OS06G0725900,OS03G0719800,OS01G0922800,OS10G0572300,OS01G0687300
GO:BP	response to radiation	GO:0009314	0.0001932080137648451	368	458	28	18096	OS03G0333400,OS01G0757200,OS01G0814800,OS03G0659200,OS03G0790600,OS01G0221100,OS04G0540200,OS01G0176700,OS01G0566100,OS09G0439500,OS05G0552100,OS04G0488600,OS02G0178100,OS06G0667100,OS08G0242800,OS01G0102900,OS09G0240200,OS08G0242700,OS10G0508100,OS11G0146800,OS03G0792400,OS03G0752100,OS03G0131200,OS06G0725900,OS03G0719800,OS01G0922800,OS10G0572300,OS01G0687300
GO:BP	small molecule biosynthetic process	GO:0044283	0.001624961059796094	632	458	37	18096	OS01G0757200,OS01G0814800,OS09G0361500,OS05G0555600,OS01G0662700,OS10G0417600,OS06G0664200,OS06G0110000,OS03G0190100,OS02G0572400,OS02G0608600,OS01G0797600,OS02G0638300,OS07G0100200,OS06G0729000,OS05G0496200,OS08G0502700,OS05G0429000,OS10G0524300,OS01G0682500,OS04G0559400,OS03G0118600,OS04G0422000,OS12G0534200,OS12G0607000,OS02G0581500,OS01G0757900,OS05G0209400,OS03G0595800,OS01G0978100,OS03G0797…
GO:BP	photosystem II assembly	GO:0010207	0.001801327585017861	10	458	5	18096	OS03G0333400,OS03G0747700,OS07G0558500,OS03G0792400,OS02G0117100
GO:BP	small molecule metabolic process	GO:0044281	0.003950969190886037	1518	458	67	18096	OS01G0757200,OS03G0726200,OS01G0814800,OS01G0221100,OS09G0361500,OS05G0555600,OS04G0608100,OS01G0662700,OS10G0417600,OS06G0664200,OS06G0110000,OS04G0459500,OS03G0190100,OS02G0572400,OS02G0608600,OS01G0797600,OS03G0736600,OS02G0638300,OS07G0100200,OS01G0865100,OS04G0623800,OS06G0729000,OS05G0496200,OS06G0326400,OS08G0378900,OS08G0502700,OS10G0484700,OS05G0429000,OS10G0524300,OS01G0682500,OS04G0559…
GO:BP	response to abiotic stimulus	GO:0009628	0.005102876253551275	827	458	43	18096	OS03G0333400,OS01G0757200,OS01G0814800,OS03G0659200,OS03G0790600,OS01G0221100,OS01G0524500,OS04G0540200,OS01G0176700,OS01G0566100,OS01G0797600,OS09G0439500,OS05G0552100,OS05G0496200,OS04G0488600,OS06G0172800,OS06G0646000,OS02G0178100,OS06G0667100,OS08G0242800,OS01G0102900,OS02G0771600,OS09G0240200,OS07G0558500,OS11G0580800,OS01G0798500,OS08G0242700,OS02G0602400,OS04G0379700,OS10G0508100,OS03G0737…
GO:BP	regulation of post-embryonic development	GO:0048580	0.006867121690000742	154	458	15	18096	OS03G0790600,OS10G0493600,OS03G0686900,OS01G0176700,OS01G0566100,OS01G0797600,OS05G0552100,OS04G0282400,OS02G0178100,OS06G0667100,OS02G0771600,OS09G0240200,OS05G0121600,OS01G0922800,OS01G0687300
GO:BP	cofactor metabolic process	GO:0051186	0.010520548069699947	528	458	31	18096	OS10G0109600,OS01G0814800,OS09G0361500,OS01G0873000,OS08G0522400,OS01G0662700,OS10G0417600,OS03G0563300,OS03G0190100,OS04G0602100,OS01G0797600,OS02G0638300,OS07G0100200,OS01G0286600,OS02G0553200,OS05G0429000,OS05G0349700,OS04G0422000,OS05G0419000,OS07G0558500,OS05G0150800,OS02G0581500,OS04G0434800,OS04G0379700,OS02G0606800,OS05G0209400,OS08G0549100,OS04G0558400,OS03G0131200,OS11G0588300,OS07G0462…
GO:BP	glycine metabolic process	GO:0006544	0.013157110170785882	14	458	5	18096	OS04G0623800,OS08G0502700,OS05G0429000,OS06G0611900,OS01G0711400
GO:BP	generation of precursor metabolites and energy	GO:0006091	0.017478547271361472	542	458	31	18096	OS03G0333400,OS07G0243200,OS03G0659200,OS03G0747700,OS07G0604000,OS01G0773700,OS08G0246400,OS03G0190100,OS03G0781400,OS09G0439500,OS08G0276100,OS05G0496200,OS02G0744000,OS06G0326400,OS10G0524300,OS01G0208700,OS03G0118600,OS07G0513000,OS03G0169100,OS05G0481000,OS07G0558500,OS01G0798500,OS03G0773800,OS08G0463900,OS08G0526300,OS03G0792400,OS04G0459900,OS01G0147900,OS06G0725900,OS02G0117100,OS07G0187…
GO:BP	small molecule catabolic process	GO:0044282	0.023233709922261397	191	458	16	18096	OS01G0757200,OS04G0608100,OS01G0865100,OS04G0623800,OS05G0429000,OS03G0169100,OS11G0605500,OS02G0581500,OS06G0611900,OS01G0711400,OS03G0720300,OS03G0713000,OS04G0558400,OS01G0147900,OS01G0159400,OS03G0425200
GO:BP	regulation of reproductive process	GO:2000241	0.026109078464091825	133	458	13	18096	OS03G0790600,OS10G0493600,OS03G0686900,OS01G0176700,OS01G0566100,OS01G0797600,OS04G0282400,OS02G0178100,OS06G0667100,OS09G0240200,OS05G0121600,OS01G0922800,OS02G0719800
GO:BP	regulation of multicellular organismal development	GO:2000026	0.03386406045834965	197	458	16	18096	OS03G0790600,OS10G0493600,OS03G0686900,OS01G0176700,OS01G0566100,OS01G0797600,OS05G0552100,OS04G0282400,OS02G0178100,OS06G0667100,OS07G0513000,OS02G0771600,OS09G0240200,OS05G0121600,OS01G0922800,OS01G0687300
GO:BP	carboxylic acid metabolic process	GO:0019752	0.046108680181472426	907	458	43	18096	OS01G0757200,OS01G0814800,OS01G0221100,OS05G0555600,OS04G0608100,OS10G0417600,OS06G0110000,OS02G0608600,OS01G0797600,OS02G0638300,OS07G0100200,OS04G0623800,OS05G0496200,OS06G0326400,OS08G0502700,OS10G0484700,OS05G0429000,OS10G0524300,OS04G0559400,OS03G0118600,OS11G0605500,OS12G0534200,OS05G0150800,OS12G0607000,OS02G0581500,OS04G0379700,OS03G0773800,OS05G0209400,OS03G0595800,OS06G0345200,OS01G0978…
GO:CC	plastid	GO:0009536	1.7197727099227074e-37	1559	478	138	18385	OS03G0333400,OS12G0291400,OS12G0274700,OS03G0778100,OS01G0814800,OS07G0243200,OS07G0469100,OS03G0659200,OS07G0534000,OS03G0747700,OS09G0361500,OS08G0382400,OS01G0869800,OS03G0686900,OS05G0555600,OS03G0701300,OS07G0626800,OS02G0769900,OS01G0773700,OS08G0485900,OS02G0257300,OS01G0851000,OS06G0664200,OS05G0291700,OS01G0862200,OS02G0596000,OS03G0138900,OS03G0425000,OS03G0563300,OS04G0459500,OS01G0144…
GO:CC	chloroplast	GO:0009507	8.612569849592336e-37	1517	478	135	18385	OS03G0333400,OS12G0291400,OS12G0274700,OS03G0778100,OS01G0814800,OS07G0243200,OS07G0469100,OS03G0659200,OS07G0534000,OS03G0747700,OS08G0382400,OS01G0869800,OS03G0686900,OS05G0555600,OS03G0701300,OS07G0626800,OS02G0769900,OS01G0773700,OS08G0485900,OS02G0257300,OS01G0851000,OS06G0664200,OS05G0291700,OS01G0862200,OS02G0596000,OS03G0425000,OS03G0563300,OS04G0459500,OS01G0144100,OS03G0190100,OS12G0292…
GO:CC	plastid part	GO:0044435	2.4542723624640587e-23	845	478	82	18385	OS03G0333400,OS03G0778100,OS07G0469100,OS03G0747700,OS08G0382400,OS01G0869800,OS07G0626800,OS01G0773700,OS08G0485900,OS02G0257300,OS01G0851000,OS06G0664200,OS05G0291700,OS01G0862200,OS03G0425000,OS01G0144100,OS05G0110100,OS04G0602100,OS02G0822600,OS09G0439500,OS03G0219900,OS07G0568900,OS01G0286600,OS02G0815400,OS12G0583400,OS06G0729000,OS10G0100300,OS10G0395200,OS08G0276100,OS06G0646000,OS10G0546…
GO:CC	chloroplast part	GO:0044434	1.5063044307324798e-22	829	478	80	18385	OS03G0333400,OS03G0778100,OS07G0469100,OS03G0747700,OS08G0382400,OS01G0869800,OS07G0626800,OS01G0773700,OS08G0485900,OS02G0257300,OS01G0851000,OS06G0664200,OS05G0291700,OS01G0862200,OS01G0144100,OS05G0110100,OS04G0602100,OS02G0822600,OS09G0439500,OS03G0219900,OS07G0568900,OS01G0286600,OS02G0815400,OS12G0583400,OS06G0729000,OS10G0100300,OS10G0395200,OS08G0276100,OS06G0646000,OS10G0546600,OS08G0266…
GO:CC	thylakoid	GO:0009579	7.425046122128597e-20	398	478	52	18385	OS03G0333400,OS03G0778100,OS01G0814800,OS07G0469100,OS07G0534000,OS03G0747700,OS08G0382400,OS01G0869800,OS01G0773700,OS02G0257300,OS07G0435300,OS05G0291700,OS01G0862200,OS01G0144100,OS05G0110100,OS04G0602100,OS09G0439500,OS07G0568900,OS01G0286600,OS02G0815400,OS12G0583400,OS10G0100300,OS10G0395200,OS08G0276100,OS02G0744000,OS07G0548300,OS02G0553200,OS01G0278900,OS08G0378900,OS11G0216100,OS01G0102…
GO:CC	thylakoid part	GO:0044436	2.3819808645499777e-18	334	478	46	18385	OS03G0333400,OS03G0778100,OS01G0814800,OS07G0469100,OS07G0534000,OS03G0747700,OS08G0382400,OS01G0869800,OS01G0773700,OS02G0257300,OS07G0435300,OS05G0291700,OS01G0862200,OS01G0144100,OS05G0110100,OS04G0602100,OS09G0439500,OS07G0568900,OS02G0815400,OS12G0583400,OS10G0100300,OS10G0395200,OS08G0276100,OS02G0744000,OS07G0548300,OS02G0553200,OS01G0278900,OS11G0216100,OS01G0102900,OS08G0347500,OS07G0513…
GO:CC	plastid thylakoid	GO:0031976	3.0944960840283516e-18	321	478	45	18385	OS03G0333400,OS03G0778100,OS07G0469100,OS03G0747700,OS08G0382400,OS01G0869800,OS01G0773700,OS02G0257300,OS05G0291700,OS01G0862200,OS01G0144100,OS05G0110100,OS04G0602100,OS09G0439500,OS07G0568900,OS01G0286600,OS02G0815400,OS12G0583400,OS10G0100300,OS10G0395200,OS08G0276100,OS02G0744000,OS02G0553200,OS01G0278900,OS11G0216100,OS01G0102900,OS03G0856500,OS07G0513000,OS05G0349700,OS03G0169100,OS06G0729…
GO:CC	chloroplast thylakoid	GO:0009534	3.0944960840283516e-18	321	478	45	18385	OS03G0333400,OS03G0778100,OS07G0469100,OS03G0747700,OS08G0382400,OS01G0869800,OS01G0773700,OS02G0257300,OS05G0291700,OS01G0862200,OS01G0144100,OS05G0110100,OS04G0602100,OS09G0439500,OS07G0568900,OS01G0286600,OS02G0815400,OS12G0583400,OS10G0100300,OS10G0395200,OS08G0276100,OS02G0744000,OS02G0553200,OS01G0278900,OS11G0216100,OS01G0102900,OS03G0856500,OS07G0513000,OS05G0349700,OS03G0169100,OS06G0729…
GO:CC	photosynthetic membrane	GO:0034357	7.05773678463384e-15	324	478	41	18385	OS03G0333400,OS03G0778100,OS07G0469100,OS08G0382400,OS01G0869800,OS01G0773700,OS02G0257300,OS07G0435300,OS05G0291700,OS01G0862200,OS01G0144100,OS05G0110100,OS04G0602100,OS09G0439500,OS07G0568900,OS02G0815400,OS12G0583400,OS10G0100300,OS10G0395200,OS08G0276100,OS02G0744000,OS07G0548300,OS02G0553200,OS01G0278900,OS11G0216100,OS01G0102900,OS08G0347500,OS07G0513000,OS03G0169100,OS06G0729650,OS07G0558…
GO:CC	plastid thylakoid membrane	GO:0055035	8.745583384199514e-15	279	478	38	18385	OS03G0333400,OS03G0778100,OS07G0469100,OS08G0382400,OS01G0869800,OS01G0773700,OS02G0257300,OS05G0291700,OS01G0862200,OS01G0144100,OS05G0110100,OS04G0602100,OS09G0439500,OS07G0568900,OS02G0815400,OS12G0583400,OS10G0100300,OS10G0395200,OS08G0276100,OS02G0744000,OS02G0553200,OS01G0278900,OS11G0216100,OS01G0102900,OS07G0513000,OS03G0169100,OS06G0729650,OS07G0558500,OS03G0769600,OS11G0580800,OS01G0798…
GO:CC	chloroplast thylakoid membrane	GO:0009535	8.745583384199514e-15	279	478	38	18385	OS03G0333400,OS03G0778100,OS07G0469100,OS08G0382400,OS01G0869800,OS01G0773700,OS02G0257300,OS05G0291700,OS01G0862200,OS01G0144100,OS05G0110100,OS04G0602100,OS09G0439500,OS07G0568900,OS02G0815400,OS12G0583400,OS10G0100300,OS10G0395200,OS08G0276100,OS02G0744000,OS02G0553200,OS01G0278900,OS11G0216100,OS01G0102900,OS07G0513000,OS03G0169100,OS06G0729650,OS07G0558500,OS03G0769600,OS11G0580800,OS01G0798…
GO:CC	thylakoid membrane	GO:0042651	1.2274426676816013e-14	313	478	40	18385	OS03G0333400,OS03G0778100,OS07G0469100,OS08G0382400,OS01G0869800,OS01G0773700,OS02G0257300,OS05G0291700,OS01G0862200,OS01G0144100,OS05G0110100,OS04G0602100,OS09G0439500,OS07G0568900,OS02G0815400,OS12G0583400,OS10G0100300,OS10G0395200,OS08G0276100,OS02G0744000,OS07G0548300,OS02G0553200,OS01G0278900,OS11G0216100,OS01G0102900,OS08G0347500,OS07G0513000,OS03G0169100,OS06G0729650,OS07G0558500,OS03G0769…
GO:CC	cytoplasmic part	GO:0044444	1.5692815810705879e-12	5706	478	228	18385	OS03G0333400,OS12G0291400,OS12G0274700,OS03G0778100,OS01G0872900,OS06G0336200,OS08G0327100,OS01G0814800,OS07G0243200,OS03G0305400,OS07G0469100,OS05G0594200,OS03G0659200,OS07G0534000,OS06G0184866,OS02G0744650,OS01G0833000,OS03G0747700,OS09G0361500,OS08G0382400,OS01G0869800,OS03G0686900,OS04G0388700,OS05G0555600,OS04G0608100,OS01G0873000,OS03G0701300,OS07G0626800,OS01G0207400,OS03G0385400,OS02G0769…
GO:CC	cytoplasm	GO:0005737	1.546443771660348e-10	7312	478	266	18385	OS10G0109600,OS03G0333400,OS04G0604000,OS12G0291400,OS12G0274700,OS03G0778100,OS01G0872900,OS06G0336200,OS08G0327100,OS03G0726200,OS10G0563550,OS01G0814800,OS07G0243200,OS03G0305400,OS07G0469100,OS05G0594200,OS03G0659200,OS07G0534000,OS06G0184866,OS02G0744650,OS01G0833000,OS03G0747700,OS09G0361500,OS08G0382400,OS01G0869800,OS03G0686900,OS04G0388700,OS05G0555600,OS04G0608100,OS01G0873000,OS03G0701…
GO:CC	plastid envelope	GO:0009526	2.329744008633149e-10	345	478	36	18385	OS07G0626800,OS08G0485900,OS05G0291700,OS02G0822600,OS09G0439500,OS03G0219900,OS01G0286600,OS12G0583400,OS06G0729000,OS10G0100300,OS10G0546600,OS08G0266300,OS01G0166800,OS01G0278900,OS03G0565200,OS01G0682500,OS01G0102900,OS07G0513000,OS05G0349700,OS05G0419000,OS07G0558500,OS06G0710300,OS11G0580800,OS08G0242700,OS09G0567366,OS02G0129900,OS02G0832200,OS06G0611900,OS01G0711400,OS03G0792400,OS03G0177…
GO:CC	organelle subcompartment	GO:0031984	3.021338487244368e-10	522	478	45	18385	OS03G0333400,OS03G0778100,OS07G0469100,OS03G0747700,OS08G0382400,OS01G0869800,OS01G0773700,OS02G0257300,OS05G0291700,OS01G0862200,OS01G0144100,OS05G0110100,OS04G0602100,OS09G0439500,OS07G0568900,OS01G0286600,OS02G0815400,OS12G0583400,OS10G0100300,OS10G0395200,OS08G0276100,OS02G0744000,OS02G0553200,OS01G0278900,OS11G0216100,OS01G0102900,OS03G0856500,OS07G0513000,OS05G0349700,OS03G0169100,OS06G0729…
GO:CC	chloroplast envelope	GO:0009941	4.271433998901419e-10	334	478	35	18385	OS07G0626800,OS08G0485900,OS05G0291700,OS02G0822600,OS09G0439500,OS03G0219900,OS01G0286600,OS12G0583400,OS06G0729000,OS10G0100300,OS10G0546600,OS08G0266300,OS01G0166800,OS01G0278900,OS03G0565200,OS01G0682500,OS01G0102900,OS07G0513000,OS05G0349700,OS05G0419000,OS07G0558500,OS06G0710300,OS11G0580800,OS08G0242700,OS09G0567366,OS02G0129900,OS02G0832200,OS06G0611900,OS01G0711400,OS03G0792400,OS03G0177…
GO:CC	intracellular part	GO:0044424	1.5933581626643512e-8	11203	478	357	18385	OS10G0109600,OS03G0333400,OS04G0604000,OS12G0291400,OS12G0274700,OS03G0778100,OS01G0872900,OS06G0336200,OS08G0327100,OS03G0726200,OS10G0563550,OS01G0814800,OS07G0243200,OS03G0305400,OS07G0469100,OS05G0594200,OS03G0659200,OS07G0534000,OS06G0184866,OS02G0744650,OS07G0410700,OS01G0833000,OS03G0747700,OS09G0361500,OS08G0382400,OS01G0869800,OS03G0686900,OS04G0388700,OS05G0555600,OS04G0608100,OS03G0183…
GO:CC	intracellular	GO:0005622	6.556806205224953e-8	11422	478	360	18385	OS10G0109600,OS03G0333400,OS04G0604000,OS12G0291400,OS12G0274700,OS03G0778100,OS01G0872900,OS06G0336200,OS08G0327100,OS03G0726200,OS10G0563550,OS01G0814800,OS07G0243200,OS03G0305400,OS07G0469100,OS05G0594200,OS03G0659200,OS07G0534000,OS06G0184866,OS02G0744650,OS07G0410700,OS01G0833000,OS03G0747700,OS09G0361500,OS08G0382400,OS01G0869800,OS03G0686900,OS04G0388700,OS05G0555600,OS04G0608100,OS03G0183…
GO:CC	thylakoid lumen	GO:0031977	7.994846765575705e-8	26	478	10	18385	OS03G0333400,OS01G0814800,OS07G0534000,OS03G0747700,OS08G0382400,OS01G0144100,OS04G0379700,OS08G0463900,OS05G0103200,OS04G0459900
GO:CC	plastid stroma	GO:0009532	0.000002749846841132881	418	478	33	18385	OS08G0382400,OS08G0485900,OS01G0851000,OS06G0664200,OS05G0291700,OS01G0862200,OS03G0425000,OS02G0822600,OS09G0439500,OS03G0219900,OS06G0729000,OS10G0100300,OS06G0646000,OS08G0266300,OS07G0548300,OS03G0565200,OS10G0524300,OS01G0682500,OS01G0102900,OS03G0856500,OS03G0118600,OS04G0422000,OS03G0315800,OS01G0763700,OS07G0558500,OS08G0242700,OS09G0567366,OS04G0434800,OS08G0483200,OS05G0103200,OS01G0574…
GO:CC	chloroplast thylakoid lumen	GO:0009543	0.000004002882743283587	9	478	6	18385	OS03G0333400,OS03G0747700,OS01G0144100,OS08G0463900,OS05G0103200,OS04G0459900
GO:CC	plastid thylakoid lumen	GO:0031978	0.000004002882743283587	9	478	6	18385	OS03G0333400,OS03G0747700,OS01G0144100,OS08G0463900,OS05G0103200,OS04G0459900
GO:CC	chloroplast stroma	GO:0009570	0.0000050240494605105524	407	478	32	18385	OS08G0382400,OS08G0485900,OS01G0851000,OS06G0664200,OS05G0291700,OS01G0862200,OS02G0822600,OS09G0439500,OS03G0219900,OS06G0729000,OS10G0100300,OS06G0646000,OS08G0266300,OS07G0548300,OS03G0565200,OS10G0524300,OS01G0682500,OS01G0102900,OS03G0856500,OS03G0118600,OS04G0422000,OS03G0315800,OS01G0763700,OS07G0558500,OS08G0242700,OS09G0567366,OS04G0434800,OS08G0483200,OS05G0103200,OS01G0574600,OS02G0117…
GO:CC	intracellular membrane-bounded organelle	GO:0043231	0.00000680750699539665	8720	478	285	18385	OS10G0109600,OS03G0333400,OS12G0291400,OS12G0274700,OS03G0778100,OS06G0336200,OS08G0327100,OS10G0563550,OS01G0814800,OS07G0243200,OS03G0305400,OS07G0469100,OS05G0594200,OS03G0659200,OS07G0534000,OS06G0184866,OS02G0744650,OS07G0410700,OS01G0833000,OS03G0747700,OS09G0361500,OS08G0382400,OS01G0869800,OS03G0686900,OS04G0388700,OS05G0555600,OS03G0183000,OS11G0444000,OS03G0701300,OS07G0626800,OS08G0130…
GO:CC	membrane-bounded organelle	GO:0043227	0.000016732133287918515	8827	478	286	18385	OS10G0109600,OS03G0333400,OS12G0291400,OS12G0274700,OS03G0778100,OS06G0336200,OS08G0327100,OS10G0563550,OS01G0814800,OS07G0243200,OS03G0305400,OS07G0469100,OS05G0594200,OS03G0659200,OS07G0534000,OS06G0184866,OS02G0744650,OS07G0410700,OS01G0833000,OS03G0747700,OS09G0361500,OS08G0382400,OS01G0869800,OS03G0686900,OS04G0388700,OS05G0555600,OS03G0183000,OS11G0444000,OS03G0701300,OS07G0626800,OS08G0130…
GO:CC	intracellular organelle	GO:0043229	0.000046681472444508	9376	478	298	18385	OS10G0109600,OS03G0333400,OS04G0604000,OS12G0291400,OS12G0274700,OS03G0778100,OS01G0872900,OS06G0336200,OS08G0327100,OS10G0563550,OS01G0814800,OS07G0243200,OS03G0305400,OS07G0469100,OS05G0594200,OS03G0659200,OS07G0534000,OS06G0184866,OS02G0744650,OS07G0410700,OS01G0833000,OS03G0747700,OS09G0361500,OS08G0382400,OS01G0869800,OS03G0686900,OS04G0388700,OS05G0555600,OS03G0183000,OS11G0444000,OS01G0873…
GO:CC	organelle	GO:0043226	0.000055543833960650225	9390	478	298	18385	OS10G0109600,OS03G0333400,OS04G0604000,OS12G0291400,OS12G0274700,OS03G0778100,OS01G0872900,OS06G0336200,OS08G0327100,OS10G0563550,OS01G0814800,OS07G0243200,OS03G0305400,OS07G0469100,OS05G0594200,OS03G0659200,OS07G0534000,OS06G0184866,OS02G0744650,OS07G0410700,OS01G0833000,OS03G0747700,OS09G0361500,OS08G0382400,OS01G0869800,OS03G0686900,OS04G0388700,OS05G0555600,OS03G0183000,OS11G0444000,OS01G0873…
GO:CC	envelope	GO:0031975	0.0016532495739212084	737	478	40	18385	OS07G0626800,OS08G0485900,OS08G0246400,OS05G0291700,OS02G0822600,OS09G0439500,OS03G0219900,OS01G0286600,OS12G0583400,OS06G0729000,OS10G0100300,OS10G0546600,OS08G0266300,OS01G0166800,OS01G0278900,OS03G0565200,OS01G0682500,OS01G0102900,OS11G0432400,OS07G0513000,OS05G0349700,OS01G0635400,OS05G0419000,OS07G0558500,OS06G0710300,OS11G0580800,OS08G0242700,OS09G0567366,OS02G0129900,OS02G0832200,OS06G0611…
GO:CC	organelle envelope	GO:0031967	0.0016532495739212084	737	478	40	18385	OS07G0626800,OS08G0485900,OS08G0246400,OS05G0291700,OS02G0822600,OS09G0439500,OS03G0219900,OS01G0286600,OS12G0583400,OS06G0729000,OS10G0100300,OS10G0546600,OS08G0266300,OS01G0166800,OS01G0278900,OS03G0565200,OS01G0682500,OS01G0102900,OS11G0432400,OS07G0513000,OS05G0349700,OS01G0635400,OS05G0419000,OS07G0558500,OS06G0710300,OS11G0580800,OS08G0242700,OS09G0567366,OS02G0129900,OS02G0832200,OS06G0611…
GO:CC	NAD(P)H dehydrogenase complex (plastoquinone)	GO:0010598	0.0087164128615195	9	478	4	18385	OS08G0276100,OS02G0744000,OS11G0216100,OS01G0763700
GO:CC	cell part	GO:0044464	0.02043619200102215	13779	478	392	18385	OS10G0109600,OS03G0333400,OS04G0604000,OS12G0291400,OS12G0274700,OS03G0778100,OS01G0872900,OS06G0336200,OS08G0327100,OS03G0726200,OS10G0563550,OS01G0814800,OS07G0243200,OS03G0305400,OS07G0469100,OS02G0190500,OS05G0594200,OS03G0659200,OS01G0631700,OS07G0534000,OS08G0101900,OS06G0184866,OS11G0604900,OS03G0790600,OS02G0744650,OS11G0605100,OS01G0929200,OS07G0410700,OS01G0833000,OS03G0747700,OS09G0361…
GO:CC	peroxisome	GO:0005777	0.02191684219918374	128	478	12	18385	OS01G0865100,OS08G0502700,OS11G0605500,OS11G0219000,OS10G0508100,OS08G0549100,OS04G0558400,OS03G0131200,OS08G0230500,OS01G0159400,OS05G0101200,OS07G0152800
GO:CC	microbody	GO:0042579	0.02191684219918374	128	478	12	18385	OS01G0865100,OS08G0502700,OS11G0605500,OS11G0219000,OS10G0508100,OS08G0549100,OS04G0558400,OS03G0131200,OS08G0230500,OS01G0159400,OS05G0101200,OS07G0152800
GO:CC	cell	GO:0005623	0.02223766842683711	13830	478	393	18385	OS10G0109600,OS03G0333400,OS04G0604000,OS12G0291400,OS12G0274700,OS03G0778100,OS01G0872900,OS06G0336200,OS08G0327100,OS03G0726200,OS10G0563550,OS01G0814800,OS07G0243200,OS03G0305400,OS07G0469100,OS02G0190500,OS05G0594200,OS03G0659200,OS01G0631700,OS07G0534000,OS08G0101900,OS06G0184866,OS11G0604900,OS03G0790600,OS02G0744650,OS11G0605100,OS01G0929200,OS07G0410700,OS01G0833000,OS03G0747700,OS09G0361…
KEGG	Carbon metabolism	KEGG:01200	0.000009325230516662038	212	114	23	3410	OS12G0291400,OS12G0274700,OS07G0604000,OS06G0664200,OS04G0459500,OS12G0292400,OS03G0781400,OS04G0623800,OS05G0496200,OS08G0502700,OS05G0429000,OS01G0682500,OS01G0208700,OS03G0169100,OS03G0773800,OS04G0490800,OS01G0574600,OS01G0978100,OS03G0713000,OS03G0255500,OS03G0131200,OS01G0147900,OS04G0165700
KEGG	Carbon fixation in photosynthetic organisms	KEGG:00710	0.000035024710785975584	65	114	12	3410	OS12G0291400,OS12G0274700,OS06G0664200,OS04G0459500,OS12G0292400,OS03G0781400,OS05G0496200,OS01G0208700,OS03G0169100,OS03G0773800,OS03G0255500,OS01G0147900
KEGG	Glyoxylate and dicarboxylate metabolism	KEGG:00630	0.00013027178796418723	61	114	11	3410	OS12G0291400,OS12G0274700,OS12G0292400,OS04G0623800,OS08G0502700,OS05G0429000,OS01G0682500,OS03G0773800,OS04G0490800,OS01G0574600,OS03G0131200
KEGG	Biosynthesis of secondary metabolites	KEGG:01110	0.0005834166247620363	830	114	48	3410	OS10G0109600,OS12G0291400,OS12G0274700,OS01G0757200,OS07G0243200,OS11G0438700,OS07G0604000,OS01G0666000,OS01G0662700,OS12G0139300,OS10G0417600,OS06G0664200,OS06G0110000,OS03G0563300,OS03G0190100,OS12G0292400,OS02G0572400,OS03G0781400,OS04G0623800,OS01G0286600,OS06G0729000,OS05G0496200,OS01G0134500,OS10G0546600,OS06G0326400,OS08G0502700,OS05G0429000,OS01G0682500,OS04G0559400,OS02G0771600,OS05G0349…

## Sheet: PsJN only
source	term_name	term_id	adjusted_p_value	term_size	query_size	intersection_size	effective_domain_size	intersections
GO:MF	pigment binding	GO:0031409	1.263862855009206e-7	16	237	7	19516	OS04G0457000,OS01G0600900,OS07G0577600,OS03G0592500,OS11G0242800,OS07G0562700,OS09G0346500
GO:MF	chlorophyll binding	GO:0016168	0.000006552530042012807	26	237	7	19516	OS04G0457000,OS01G0600900,OS07G0577600,OS03G0592500,OS11G0242800,OS07G0562700,OS09G0346500
GO:BP	photosynthesis	GO:0015979	1.9944333881691108e-17	220	249	29	18096	OS04G0457000,OS01G0600900,OS03G0343900,OS07G0544800,OS04G0414700,OS07G0577600,OS05G0560000,OS03G0592500,OS07G0141400,OS01G0501800,OS11G0242800,OS03G0748300,OS05G0401100,OS02G0744900,OS07G0562700,OS01G0938100,OS08G0560900,OS09G0306650,OS12G0189400,OS09G0346500,OS06G0694500,OS03G0158300,OS01G0303000,OS12G0271700,OS05G0480000,OS08G0566600,OS08G0512500,OS05G0549100,OS01G0552300
GO:BP	photosynthesis, light reaction	GO:0019684	2.816446564076571e-13	107	249	19	18096	OS04G0457000,OS01G0600900,OS07G0544800,OS04G0414700,OS07G0577600,OS03G0592500,OS01G0501800,OS11G0242800,OS03G0748300,OS05G0401100,OS07G0562700,OS09G0306650,OS09G0346500,OS06G0694500,OS03G0158300,OS05G0480000,OS08G0566600,OS05G0549100,OS01G0552300
GO:BP	generation of precursor metabolites and energy	GO:0006091	3.0518847161523715e-7	542	249	29	18096	OS04G0457000,OS01G0600900,OS07G0544800,OS04G0414700,OS07G0577600,OS02G0731400,OS03G0592500,OS02G0814400,OS01G0501800,OS08G0137400,OS02G0720100,OS11G0242800,OS03G0748300,OS05G0401100,OS07G0562700,OS09G0306650,OS08G0104600,OS06G0101600,OS09G0346500,OS06G0694500,OS03G0158300,OS05G0480000,OS08G0566600,OS03G0851800,OS01G0654500,OS05G0549100,OS01G0552300,OS01G0730500,OS02G0277600
GO:BP	photosynthesis, light harvesting in photosystem I	GO:0009768	6.223148979374144e-7	16	249	7	18096	OS04G0457000,OS01G0600900,OS07G0577600,OS03G0592500,OS11G0242800,OS07G0562700,OS09G0346500
GO:BP	photosynthesis, light harvesting	GO:0009765	0.0000014326244787019348	27	249	8	18096	OS04G0457000,OS01G0600900,OS07G0577600,OS03G0592500,OS11G0242800,OS05G0401100,OS07G0562700,OS09G0346500
GO:BP	protein-chromophore linkage	GO:0018298	0.0000939472990270683	30	249	7	18096	OS04G0457000,OS01G0600900,OS07G0577600,OS03G0592500,OS11G0242800,OS07G0562700,OS09G0346500
GO:BP	photosynthetic electron transport chain	GO:0009767	0.002377938723399545	47	249	7	18096	OS07G0544800,OS04G0414700,OS03G0748300,OS09G0306650,OS03G0158300,OS08G0566600,OS01G0552300
GO:BP	electron transport chain	GO:0022900	0.006316773238427561	282	249	15	18096	OS07G0544800,OS04G0414700,OS02G0731400,OS02G0814400,OS08G0137400,OS02G0720100,OS03G0748300,OS09G0306650,OS08G0104600,OS06G0101600,OS03G0158300,OS08G0566600,OS01G0552300,OS01G0730500,OS02G0277600
GO:BP	response to abiotic stimulus	GO:0009628	0.007535771535452868	827	249	28	18096	OS04G0457000,OS01G0600900,OS07G0577600,OS08G0425700,OS03G0592500,OS11G0242800,OS07G0562700,OS02G0629200,OS09G0346500,OS01G0269900,OS05G0383100,OS06G0603600,OS03G0231900,OS08G0566600,OS07G0635900,OS06G0154200,OS01G0948400,OS10G0471300,OS05G0549100,OS05G0129300,OS02G0201000,OS09G0514400,OS08G0163500,OS07G0695100,OS05G0592800,OS02G0255500,OS05G0333200,OS01G0512100
GO:BP	regulation of photosynthesis	GO:0010109	0.03024913723762891	29	249	5	18096	OS01G0501800,OS01G0303000,OS05G0480000,OS05G0549100,OS01G0552300
GO:BP	photosynthetic electron transport in photosystem I	GO:0009773	0.039376993677399275	16	249	4	18096	OS03G0748300,OS09G0306650,OS03G0158300,OS08G0566600
GO:CC	thylakoid	GO:0009579	8.3602437886748e-22	398	268	42	18385	OS04G0457000,OS01G0600900,OS03G0343900,OS09G0517000,OS07G0544800,OS04G0414700,OS10G0536500,OS07G0577600,OS05G0560000,OS02G0815300,OS03G0592500,OS07G0141400,OS01G0501800,OS11G0242800,OS05G0401100,OS02G0744900,OS07G0562700,OS01G0938100,OS08G0560900,OS09G0306650,OS12G0189400,OS06G0101600,OS09G0346500,OS03G0278900,OS03G0158300,OS05G0480000,OS08G0566600,OS01G0666600,OS02G0125000,OS01G0761000,OS08G0512…
GO:CC	thylakoid part	GO:0044436	9.441111317292106e-19	334	268	36	18385	OS04G0457000,OS01G0600900,OS03G0343900,OS07G0544800,OS04G0414700,OS10G0536500,OS07G0577600,OS05G0560000,OS03G0592500,OS07G0141400,OS01G0501800,OS11G0242800,OS05G0401100,OS02G0744900,OS07G0562700,OS01G0938100,OS08G0560900,OS09G0306650,OS12G0189400,OS06G0101600,OS09G0346500,OS03G0278900,OS03G0158300,OS08G0566600,OS01G0666600,OS01G0761000,OS08G0512500,OS03G0293100,OS03G0634000,OS01G0102300,OS03G0176…
GO:CC	photosynthetic membrane	GO:0034357	2.973516854454766e-17	324	268	34	18385	OS04G0457000,OS01G0600900,OS03G0343900,OS07G0544800,OS04G0414700,OS10G0536500,OS07G0577600,OS05G0560000,OS03G0592500,OS07G0141400,OS01G0501800,OS11G0242800,OS05G0401100,OS02G0744900,OS07G0562700,OS01G0938100,OS08G0560900,OS09G0306650,OS12G0189400,OS06G0101600,OS09G0346500,OS03G0278900,OS03G0158300,OS08G0566600,OS01G0666600,OS01G0761000,OS08G0512500,OS03G0293100,OS03G0634000,OS03G0176700,OS05G0549…
GO:CC	chloroplast	GO:0009507	1.0622848550907447e-15	1517	268	69	18385	OS04G0457000,OS01G0600900,OS09G0517000,OS07G0544800,OS04G0414700,OS10G0536500,OS06G0708400,OS07G0577600,OS05G0161500,OS05G0560000,OS02G0815300,OS03G0592500,OS07G0141400,OS07G0243150,OS03G0360600,OS11G0242800,OS03G0748300,OS05G0401100,OS02G0744900,OS07G0562700,OS01G0938100,OS02G0749800,OS09G0306650,OS12G0189400,OS08G0104600,OS06G0101600,OS09G0346500,OS06G0694500,OS03G0278900,OS03G0158300,OS05G0500…
GO:CC	plastid	GO:0009536	1.132966710069627e-15	1559	268	70	18385	OS04G0457000,OS01G0600900,OS09G0517000,OS07G0544800,OS04G0414700,OS10G0536500,OS06G0708400,OS07G0577600,OS05G0161500,OS05G0560000,OS02G0815300,OS03G0592500,OS07G0141400,OS07G0243150,OS03G0360600,OS11G0242800,OS03G0748300,OS05G0401100,OS02G0744900,OS07G0562700,OS01G0938100,OS02G0749800,OS09G0306650,OS12G0189400,OS08G0104600,OS06G0101600,OS09G0346500,OS06G0694500,OS03G0278900,OS03G0158300,OS05G0500…
GO:CC	plastid thylakoid	GO:0031976	1.7250700022452076e-15	321	268	32	18385	OS04G0457000,OS01G0600900,OS09G0517000,OS07G0544800,OS10G0536500,OS07G0577600,OS05G0560000,OS02G0815300,OS03G0592500,OS11G0242800,OS05G0401100,OS02G0744900,OS07G0562700,OS01G0938100,OS09G0306650,OS12G0189400,OS06G0101600,OS09G0346500,OS03G0278900,OS03G0158300,OS08G0566600,OS01G0666600,OS02G0125000,OS01G0761000,OS08G0512500,OS03G0293100,OS03G0634000,OS01G0102300,OS04G0607000,OS03G0176700,OS08G0167…
GO:CC	chloroplast thylakoid	GO:0009534	1.7250700022452076e-15	321	268	32	18385	OS04G0457000,OS01G0600900,OS09G0517000,OS07G0544800,OS10G0536500,OS07G0577600,OS05G0560000,OS02G0815300,OS03G0592500,OS11G0242800,OS05G0401100,OS02G0744900,OS07G0562700,OS01G0938100,OS09G0306650,OS12G0189400,OS06G0101600,OS09G0346500,OS03G0278900,OS03G0158300,OS08G0566600,OS01G0666600,OS02G0125000,OS01G0761000,OS08G0512500,OS03G0293100,OS03G0634000,OS01G0102300,OS04G0607000,OS03G0176700,OS08G0167…
GO:CC	thylakoid membrane	GO:0042651	7.004511696789513e-15	313	268	31	18385	OS04G0457000,OS01G0600900,OS07G0544800,OS10G0536500,OS07G0577600,OS05G0560000,OS03G0592500,OS07G0141400,OS01G0501800,OS11G0242800,OS05G0401100,OS02G0744900,OS07G0562700,OS01G0938100,OS09G0306650,OS12G0189400,OS06G0101600,OS09G0346500,OS03G0278900,OS03G0158300,OS08G0566600,OS01G0666600,OS01G0761000,OS08G0512500,OS03G0293100,OS03G0634000,OS03G0176700,OS05G0549100,OS02G0668100,OS08G0167500,OS01G0895…
GO:CC	chloroplast thylakoid membrane	GO:0009535	1.5254794246346388e-12	279	268	27	18385	OS04G0457000,OS01G0600900,OS07G0544800,OS10G0536500,OS07G0577600,OS05G0560000,OS03G0592500,OS11G0242800,OS05G0401100,OS02G0744900,OS07G0562700,OS01G0938100,OS09G0306650,OS12G0189400,OS06G0101600,OS09G0346500,OS03G0278900,OS03G0158300,OS08G0566600,OS01G0666600,OS01G0761000,OS08G0512500,OS03G0293100,OS03G0634000,OS03G0176700,OS08G0167500,OS01G0895100
GO:CC	plastid thylakoid membrane	GO:0055035	1.5254794246346388e-12	279	268	27	18385	OS04G0457000,OS01G0600900,OS07G0544800,OS10G0536500,OS07G0577600,OS05G0560000,OS03G0592500,OS11G0242800,OS05G0401100,OS02G0744900,OS07G0562700,OS01G0938100,OS09G0306650,OS12G0189400,OS06G0101600,OS09G0346500,OS03G0278900,OS03G0158300,OS08G0566600,OS01G0666600,OS01G0761000,OS08G0512500,OS03G0293100,OS03G0634000,OS03G0176700,OS08G0167500,OS01G0895100
GO:CC	photosystem	GO:0009521	4.825820097914259e-12	93	268	17	18385	OS04G0457000,OS01G0600900,OS03G0343900,OS07G0544800,OS04G0414700,OS07G0577600,OS05G0560000,OS03G0592500,OS07G0141400,OS01G0501800,OS11G0242800,OS07G0562700,OS01G0938100,OS08G0560900,OS12G0189400,OS09G0346500,OS08G0512500
GO:CC	chloroplast part	GO:0044434	1.70150473426189e-11	829	268	44	18385	OS04G0457000,OS01G0600900,OS09G0517000,OS07G0544800,OS10G0536500,OS07G0577600,OS05G0560000,OS02G0815300,OS03G0592500,OS11G0242800,OS05G0401100,OS02G0744900,OS07G0562700,OS01G0938100,OS09G0306650,OS12G0189400,OS06G0101600,OS09G0346500,OS06G0694500,OS03G0278900,OS03G0158300,OS11G0524300,OS08G0117100,OS08G0566600,OS01G0666600,OS02G0125000,OS01G0761000,OS08G0512500,OS03G0293100,OS03G0634000,OS01G0102…
GO:CC	plastid part	GO:0044435	3.3054740038253944e-11	845	268	44	18385	OS04G0457000,OS01G0600900,OS09G0517000,OS07G0544800,OS10G0536500,OS07G0577600,OS05G0560000,OS02G0815300,OS03G0592500,OS11G0242800,OS05G0401100,OS02G0744900,OS07G0562700,OS01G0938100,OS09G0306650,OS12G0189400,OS06G0101600,OS09G0346500,OS06G0694500,OS03G0278900,OS03G0158300,OS11G0524300,OS08G0117100,OS08G0566600,OS01G0666600,OS02G0125000,OS01G0761000,OS08G0512500,OS03G0293100,OS03G0634000,OS01G0102…
GO:CC	photosystem I	GO:0009522	2.2604579387038062e-10	34	268	11	18385	OS04G0457000,OS01G0600900,OS04G0414700,OS07G0577600,OS05G0560000,OS03G0592500,OS11G0242800,OS07G0562700,OS08G0560900,OS12G0189400,OS09G0346500
GO:CC	organelle subcompartment	GO:0031984	2.814401289261644e-10	522	268	33	18385	OS04G0457000,OS01G0600900,OS09G0517000,OS07G0544800,OS10G0536500,OS06G0708400,OS07G0577600,OS05G0560000,OS02G0815300,OS03G0592500,OS11G0242800,OS05G0401100,OS02G0744900,OS07G0562700,OS01G0938100,OS09G0306650,OS12G0189400,OS06G0101600,OS09G0346500,OS03G0278900,OS03G0158300,OS08G0566600,OS01G0666600,OS02G0125000,OS01G0761000,OS08G0512500,OS03G0293100,OS03G0634000,OS01G0102300,OS04G0607000,OS03G0176…
GO:CC	cytoplasmic part	GO:0044444	3.899338169083256e-10	5706	268	138	18385	OS04G0457000,OS01G0600900,OS09G0517000,OS03G0770800,OS07G0544800,OS07G0212200,OS04G0414700,OS10G0536500,OS06G0708400,OS07G0577600,OS05G0161500,OS05G0560000,OS04G0684900,OS12G0173366,OS06G0714600,OS02G0815300,OS03G0592500,OS07G0141400,OS07G0243150,OS03G0360600,OS01G0389700,OS06G0272700,OS11G0242800,OS03G0748300,OS05G0401100,OS08G0110100,OS02G0329300,OS02G0744900,OS07G0562700,OS01G0938100,OS03G0411…
GO:CC	photosystem II	GO:0009523	6.835831441679848e-9	72	268	13	18385	OS04G0457000,OS01G0600900,OS03G0343900,OS07G0544800,OS07G0577600,OS03G0592500,OS07G0141400,OS01G0501800,OS11G0242800,OS07G0562700,OS01G0938100,OS09G0346500,OS08G0512500
GO:CC	cytoplasm	GO:0005737	6.184707191117181e-8	7312	268	157	18385	OS04G0457000,OS01G0600900,OS01G0639900,OS09G0517000,OS03G0770800,OS07G0544800,OS07G0212200,OS04G0414700,OS10G0536500,OS06G0708400,OS07G0577600,OS05G0161500,OS05G0560000,OS05G0413200,OS04G0684900,OS12G0173366,OS06G0714600,OS02G0815300,OS03G0592500,OS07G0141400,OS07G0243150,OS10G0161700,OS03G0360600,OS01G0389700,OS06G0272700,OS11G0242800,OS03G0748300,OS05G0163000,OS05G0401100,OS08G0110100,OS02G0329…
GO:CC	membrane protein complex	GO:0098796	1.56876251703176e-7	592	268	31	18385	OS04G0457000,OS01G0600900,OS03G0343900,OS07G0544800,OS04G0414700,OS07G0577600,OS05G0560000,OS12G0173366,OS03G0592500,OS07G0141400,OS01G0501800,OS11G0242800,OS07G0562700,OS01G0938100,OS08G0560900,OS09G0306650,OS12G0189400,OS09G0346500,OS03G0278900,OS03G0158300,OS05G0383100,OS08G0512500,OS03G0634000,OS02G0639800,OS09G0568900,OS03G0678400,OS02G0832500,OS03G0572300,OS01G0707300,OS07G0194000,OS05G0333…
GO:CC	chloroplast envelope	GO:0009941	0.00010171080328471864	334	268	19	18385	OS04G0457000,OS01G0600900,OS07G0577600,OS03G0592500,OS11G0242800,OS02G0744900,OS07G0562700,OS09G0346500,OS03G0278900,OS11G0524300,OS08G0117100,OS03G0634000,OS08G0416900,OS07G0100300,OS04G0607000,OS08G0139100,OS01G0832000,OS01G0895100,OS08G0344600
GO:CC	plastid envelope	GO:0009526	0.00016594204264510325	345	268	19	18385	OS04G0457000,OS01G0600900,OS07G0577600,OS03G0592500,OS11G0242800,OS02G0744900,OS07G0562700,OS09G0346500,OS03G0278900,OS11G0524300,OS08G0117100,OS03G0634000,OS08G0416900,OS07G0100300,OS04G0607000,OS08G0139100,OS01G0832000,OS01G0895100,OS08G0344600
GO:CC	plastoglobule	GO:0010287	0.0008799105586768912	46	268	7	18385	OS04G0457000,OS01G0600900,OS07G0577600,OS03G0592500,OS11G0242800,OS07G0562700,OS09G0346500
GO:CC	intracellular part	GO:0044424	0.0018593617411648195	11203	268	197	18385	OS04G0457000,OS01G0600900,OS03G0343900,OS01G0639900,OS09G0517000,OS03G0770800,OS07G0544800,OS07G0212200,OS04G0414700,OS10G0536500,OS06G0708400,OS03G0103400,OS07G0577600,OS05G0161500,OS05G0560000,OS05G0413200,OS07G0241700,OS04G0684900,OS12G0173366,OS06G0714600,OS02G0815300,OS03G0592500,OS02G0697500,OS07G0141400,OS01G0501800,OS07G0243150,OS10G0161700,OS03G0360600,OS01G0389700,OS06G0272700,OS11G0242…
GO:CC	intracellular	GO:0005622	0.003240476867013924	11422	268	199	18385	OS04G0457000,OS01G0600900,OS03G0343900,OS01G0639900,OS09G0517000,OS03G0770800,OS07G0544800,OS07G0212200,OS04G0414700,OS10G0536500,OS06G0708400,OS03G0103400,OS07G0577600,OS05G0161500,OS05G0560000,OS05G0413200,OS07G0241700,OS04G0684900,OS12G0173366,OS06G0714600,OS02G0815300,OS03G0592500,OS02G0697500,OS07G0141400,OS01G0501800,OS07G0243150,OS10G0161700,OS03G0360600,OS01G0389700,OS06G0272700,OS11G0242…
GO:CC	photosystem II oxygen evolving complex	GO:0009654	0.013852242272093737	30	268	5	18385	OS07G0544800,OS07G0141400,OS01G0501800,OS01G0938100,OS08G0512500
GO:CC	chloroplast stroma	GO:0009570	0.021856063467970883	407	268	17	18385	OS04G0457000,OS01G0600900,OS07G0577600,OS03G0592500,OS11G0242800,OS07G0562700,OS01G0938100,OS09G0346500,OS06G0694500,OS08G0117100,OS09G0327400,OS02G0169900,OS08G0139100,OS08G0167500,OS01G0552300,OS01G0895100,OS01G0719700
GO:CC	plastid stroma	GO:0009532	0.030090017956983257	418	268	17	18385	OS04G0457000,OS01G0600900,OS07G0577600,OS03G0592500,OS11G0242800,OS07G0562700,OS01G0938100,OS09G0346500,OS06G0694500,OS08G0117100,OS09G0327400,OS02G0169900,OS08G0139100,OS08G0167500,OS01G0552300,OS01G0895100,OS01G0719700
GO:CC	intracellular membrane-bounded organelle	GO:0043231	0.04830498367631335	8720	268	156	18385	OS04G0457000,OS01G0600900,OS09G0517000,OS03G0770800,OS07G0544800,OS04G0414700,OS10G0536500,OS06G0708400,OS03G0103400,OS07G0577600,OS05G0161500,OS05G0560000,OS07G0241700,OS12G0173366,OS06G0714600,OS02G0815300,OS03G0592500,OS02G0697500,OS07G0141400,OS07G0243150,OS10G0161700,OS03G0360600,OS01G0389700,OS06G0272700,OS11G0242800,OS03G0748300,OS07G0668200,OS05G0401100,OS08G0110100,OS02G0744900,OS07G0562…
KEGG	Photosynthesis - antenna proteins	KEGG:00196	1.0243344804108384e-7	15	64	7	3410	OS04G0457000,OS01G0600900,OS07G0577600,OS03G0592500,OS11G0242800,OS07G0562700,OS09G0346500
KEGG	Photosynthesis	KEGG:00195	1.204080698637638e-7	57	64	11	3410	OS07G0544800,OS04G0414700,OS05G0560000,OS07G0141400,OS01G0501800,OS01G0938100,OS08G0560900,OS12G0189400,OS08G0104600,OS06G0101600,OS03G0278900
KEGG	Terpenoid backbone biosynthesis	KEGG:00900	0.016628476827112687	37	64	5	3410	OS02G0744900,OS07G0546000,OS02G0668100,OS02G0109100,OS09G0514400

## Sheet: Pk only
source	term_name	term_id	adjusted_p_value		term_size	query_size	intersection_size	effective_domain_size	intersections
GO:MF	structural constituent of ribosome	GO:0003735	5.454291366899768e-50		346	801	74	38866	OS09G0568400,OS07G0572900,OS03G0341100,OS06G0550000,OS08G0130500,OS01G0205500,OS05G0207300,OS02G0699600,OS12G0150100,OS07G0674700,OS01G0231700,OS04G0376000,OS06G0172600,OS04G0598200,OS03G0408300,OS08G0120000,OS08G0117300,OS12G0567700,OS03G0807800,OS02G0284600,OS11G0151300,OS07G0208000,OS01G0328400,OS07G0674200,OS07G0613200,OS11G0602500,OS02G0804100,OS01G0834500,OS03G0756000,OS07G0180900,OS01G0834…
GO:MF	structural molecule activity	GO:0005198	4.089352382318426e-49		432	801	80	38866	OS09G0568400,OS07G0572900,OS03G0341100,OS06G0550000,OS08G0130500,OS01G0205500,OS05G0207300,OS02G0699600,OS12G0150100,OS07G0674700,OS01G0231700,OS04G0376000,OS06G0172600,OS04G0598200,OS04G0608400,OS03G0408300,OS08G0120000,OS08G0117300,OS12G0567700,OS03G0807800,OS02G0284600,OS11G0151300,OS07G0208000,OS01G0328400,OS07G0674200,OS07G0613200,OS11G0602500,OS02G0804100,OS01G0834500,OS03G0756000,OS07G0180…
GO:MF	molecular_function	GO:0003674	1.5590252552729464e-23		17727	801	512	38866	OS01G0878900,OS01G0952800,OS01G0720500,OS01G0566800,OS04G0572400,OS09G0555150,OS02G0677300,OS04G0460300,OS05G0527800,OS06G0244700,OS11G0151400,OS12G0601300,OS04G0101400,OS01G0872600,OS11G0460800,OS07G0176500,OS08G0474000,OS04G0571600,OS10G0528900,OS01G0723000,OS06G0610800,OS10G0109300,OS05G0442700,OS10G0533500,OS06G0681600,OS06G0131700,OS01G0214600,OS12G0561900,OS05G0475400,OS03G0767000,OS12G0572…
GO:MF	rRNA binding	GO:0019843	2.568397226337604e-10		82	801	17	38866	OS07G0572900,OS08G0130500,OS05G0207300,OS02G0699600,OS04G0598200,OS08G0117300,OS11G0602500,OS08G0117200,OS11G0482000,OS09G0485900,OS02G0111700,OS05G0144200,OS11G0602600,OS08G0128500,OS03G0725000,OS03G0139100,OS02G0534800
GO:MF	RNA binding	GO:0003723	5.08046182033799e-8		1026	801	55	38866	OS01G0723000,OS01G0143300,OS07G0572900,OS08G0130500,OS05G0207300,OS02G0699600,OS12G0150100,OS04G0376000,OS04G0598200,OS02G0567900,OS08G0117300,OS12G0567700,OS03G0807800,OS11G0151300,OS07G0674200,OS11G0602500,OS03G0756000,OS01G0140500,OS06G0608300,OS04G0473400,OS07G0549800,OS04G0515300,OS03G0798600,OS09G0471900,OS07G0173501,OS02G0591700,OS05G0141400,OS08G0117200,OS06G0134000,OS11G0482000,OS08G0492…
GO:MF	oxidoreductase activity	GO:0016491	0.000506431858606859		1739	801	66	38866	OS01G0878900,OS11G0151400,OS04G0101400,OS10G0109300,OS10G0533500,OS06G0681600,OS03G0767000,OS01G0263300,OS08G0371200,OS02G0503900,OS01G0197100,OS04G0337500,OS10G0317900,OS04G0483500,OS02G0171100,OS09G0127300,OS10G0513900,OS09G0498500,OS05G0499400,OS03G0417700,OS09G0354300,OS08G0417100,OS12G0268000,OS01G0294700,OS06G0625500,OS04G0182200,OS10G0320100,OS05G0495700,OS01G0194600,OS07G0190800,OS02G0504…
GO:MF	catalytic activity	GO:0003824	0.000611710886833966		9355	801	250	38866	OS01G0878900,OS09G0555150,OS05G0527800,OS11G0151400,OS04G0101400,OS11G0460800,OS10G0528900,OS01G0723000,OS06G0610800,OS10G0109300,OS10G0533500,OS06G0681600,OS01G0214600,OS12G0561900,OS05G0475400,OS03G0767000,OS04G0525100,OS03G0300900,OS01G0263300,OS08G0371200,OS08G0531000,OS02G0503900,OS03G0181500,OS01G0197100,OS02G0626100,OS08G0526100,OS04G0337500,OS11G0189600,OS01G0168800,OS05G0136900,OS10G0317…
GO:MF	nucleic acid binding	GO:0003676	0.0008275461236709763		3205	801	104	38866	OS01G0952800,OS04G0572400,OS02G0677300,OS08G0474000,OS01G0723000,OS06G0610800,OS05G0442700,OS06G0131700,OS12G0572000,OS09G0522200,OS06G0637500,OS05G0489800,OS05G0525900,OS05G0413000,OS02G0713700,OS01G0143300,OS08G0427700,OS07G0572900,OS06G0130900,OS09G0106700,OS08G0524800,OS08G0130500,OS01G0584900,OS05G0207300,OS02G0699600,OS12G0150100,OS04G0519700,OS04G0376000,OS04G0610400,OS05G0579100,OS01G0826…
GO:MF	binding	GO:0005488	0.0018457773102310826		11937	801	304	38866	OS01G0878900,OS01G0952800,OS01G0720500,OS01G0566800,OS04G0572400,OS02G0677300,OS06G0244700,OS11G0151400,OS12G0601300,OS04G0101400,OS07G0176500,OS08G0474000,OS10G0528900,OS01G0723000,OS06G0610800,OS10G0109300,OS05G0442700,OS10G0533500,OS06G0681600,OS06G0131700,OS05G0475400,OS03G0767000,OS12G0572000,OS03G0114400,OS01G0263300,OS08G0531000,OS04G0301500,OS01G0705700,OS09G0522200,OS02G0503900,OS01G0716…
GO:MF	large ribosomal subunit rRNA binding	GO:0070180	0.023258434579528742		12	801	4	38866	OS08G0130500,OS02G0699600,OS04G0598200,OS03G0139100
GO:MF	4-coumarate-CoA ligase activity	GO:0016207	0.025314723268296167		5	801	3	38866	OS02G0177600,OS02G0697400,OS08G0448000
GO:MF	small ribosomal subunit rRNA binding	GO:0070181	0.0330473326151214		13	801	4	38866	OS07G0572900,OS08G0117300,OS08G0117200,OS02G0534800
GO:MF	threonine-type peptidase activity	GO:0070003	0.0337470132722293		24	801	5	38866	OS11G0615700,OS09G0538200,OS08G0548900,OS09G0505600,OS06G0643100
GO:MF	threonine-type endopeptidase activity	GO:0004298	0.0337470132722293		24	801	5	38866	OS11G0615700,OS09G0538200,OS08G0548900,OS09G0505600,OS06G0643100
GO:MF	ATPase activity, coupled to transmembrane movement of ions, rotational mechanism	GO:0044769	0.03541564115140705		38	801	6	38866	OS07G0495200,OS05G0106100,OS04G0643100,OS11G0169900,OS01G0600000,OS01G0610100
GO:MF	cofactor binding	GO:0048037	0.04909886556330878		1226	801	45	38866	OS01G0720500,OS11G0151400,OS04G0101400,OS10G0109300,OS06G0681600,OS05G0475400,OS03G0767000,OS01G0263300,OS02G0503900,OS01G0197100,OS08G0526100,OS10G0317900,OS10G0517500,OS02G0171100,OS09G0127300,OS10G0513900,OS05G0499400,OS04G0281900,OS03G0417700,OS12G0268000,OS01G0294700,OS10G0320100,OS10G0545800,OS06G0656300,OS05G0495700,OS01G0194600,OS01G0371200,OS02G0504000,OS02G0177700,OS05G0549700,OS03G0757…
GO:BP	peptide metabolic process	GO:0006518	1.0497988243486505e-38		774	801	91	38866	OS01G0952800,OS10G0528900,OS01G0723000,OS01G0143300,OS09G0568400,OS07G0572900,OS03G0341100,OS06G0550000,OS08G0130500,OS01G0205500,OS05G0207300,OS02G0699600,OS12G0150100,OS01G0371200,OS07G0674700,OS01G0231700,OS04G0376000,OS06G0172600,OS04G0598200,OS03G0408300,OS01G0151400,OS08G0120000,OS10G0531400,OS08G0117300,OS12G0567700,OS01G0686800,OS03G0807800,OS02G0284600,OS11G0151300,OS07G0208000,OS01G0328…
GO:BP	peptide biosynthetic process	GO:0043043	3.632543573464309e-37		680	801	84	38866	OS01G0952800,OS01G0723000,OS01G0143300,OS09G0568400,OS07G0572900,OS03G0341100,OS06G0550000,OS08G0130500,OS01G0205500,OS05G0207300,OS02G0699600,OS12G0150100,OS07G0674700,OS01G0231700,OS04G0376000,OS06G0172600,OS04G0598200,OS03G0408300,OS01G0151400,OS08G0120000,OS08G0117300,OS12G0567700,OS01G0686800,OS03G0807800,OS02G0284600,OS11G0151300,OS07G0208000,OS01G0328400,OS07G0674200,OS07G0613200,OS11G0602…
GO:BP	translation	GO:0006412	6.922161191820222e-37	6.02891	668	801	83	38866	OS01G0723000,OS01G0143300,OS09G0568400,OS07G0572900,OS03G0341100,OS06G0550000,OS08G0130500,OS01G0205500,OS05G0207300,OS02G0699600,OS12G0150100,OS07G0674700,OS01G0231700,OS04G0376000,OS06G0172600,OS04G0598200,OS03G0408300,OS01G0151400,OS08G0120000,OS08G0117300,OS12G0567700,OS01G0686800,OS03G0807800,OS02G0284600,OS11G0151300,OS07G0208000,OS01G0328400,OS07G0674200,OS07G0613200,OS11G0602500,OS02G0804…
GO:BP	cellular amide metabolic process	GO:0043603	1.7222540423035445e-35	5.08741	887	801	93	38866	OS01G0952800,OS10G0528900,OS01G0723000,OS01G0143300,OS03G0597600,OS09G0568400,OS07G0572900,OS03G0341100,OS06G0550000,OS08G0130500,OS01G0205500,OS05G0207300,OS02G0699600,OS12G0150100,OS01G0371200,OS07G0674700,OS01G0231700,OS04G0376000,OS06G0172600,OS04G0598200,OS03G0408300,OS01G0151400,OS08G0120000,OS10G0531400,OS08G0117300,OS12G0567700,OS01G0686800,OS03G0807800,OS02G0284600,OS11G0151300,OS07G0208…
GO:BP	amide biosynthetic process	GO:0043604	1.5009340507563681e-34		736	801	84	38866	OS01G0952800,OS01G0723000,OS01G0143300,OS09G0568400,OS07G0572900,OS03G0341100,OS06G0550000,OS08G0130500,OS01G0205500,OS05G0207300,OS02G0699600,OS12G0150100,OS07G0674700,OS01G0231700,OS04G0376000,OS06G0172600,OS04G0598200,OS03G0408300,OS01G0151400,OS08G0120000,OS08G0117300,OS12G0567700,OS01G0686800,OS03G0807800,OS02G0284600,OS11G0151300,OS07G0208000,OS01G0328400,OS07G0674200,OS07G0613200,OS11G0602…
GO:BP	organonitrogen compound biosynthetic process	GO:1901566	1.4946953595751882e-33		1377	801	113	38866	OS01G0952800,OS01G0723000,OS10G0517500,OS01G0143300,OS03G0389700,OS09G0432900,OS09G0568400,OS07G0572900,OS03G0341100,OS06G0550000,OS12G0268000,OS08G0130500,OS01G0205500,OS05G0207300,OS02G0699600,OS12G0150100,OS07G0674700,OS01G0231700,OS04G0376000,OS07G0190000,OS06G0172600,OS03G0757900,OS04G0598200,OS05G0367400,OS03G0408300,OS01G0151400,OS08G0120000,OS08G0206600,OS08G0117300,OS12G0567700,OS01G0686…
GO:BP	organic substance biosynthetic process	GO:1901576	1.466454870925589e-23	2.25712	3934	801	183	38866	OS01G0952800,OS01G0566800,OS04G0572400,OS02G0677300,OS12G0601300,OS04G0101400,OS08G0474000,OS01G0723000,OS05G0442700,OS10G0533500,OS06G0131700,OS03G0767000,OS12G0572000,OS09G0522200,OS03G0181500,OS01G0197100,OS02G0626100,OS10G0317900,OS10G0517500,OS05G0413000,OS02G0713700,OS01G0143300,OS01G0926300,OS03G0819600,OS03G0389700,OS05G0135700,OS05G0413400,OS09G0432900,OS09G0568400,OS02G0205500,OS07G0572…
GO:BP	cellular biosynthetic process	GO:0044249	1.1440231240757633e-22		3869	801	179	38866	OS01G0952800,OS01G0566800,OS04G0572400,OS02G0677300,OS12G0601300,OS08G0474000,OS01G0723000,OS05G0442700,OS06G0131700,OS03G0767000,OS12G0572000,OS09G0522200,OS03G0181500,OS02G0626100,OS10G0517500,OS05G0413000,OS02G0713700,OS01G0143300,OS01G0926300,OS03G0389700,OS05G0135700,OS05G0413400,OS09G0432900,OS09G0568400,OS02G0205500,OS07G0572900,OS03G0341100,OS06G0550000,OS12G0268000,OS08G0524800,OS08G0130…
GO:BP	biosynthetic process	GO:0009058	1.5985106002677363e-22	2.19215	4117	801	186	38866	OS01G0952800,OS01G0566800,OS04G0572400,OS02G0677300,OS12G0601300,OS04G0101400,OS08G0474000,OS01G0723000,OS05G0442700,OS10G0533500,OS06G0131700,OS03G0767000,OS12G0572000,OS09G0522200,OS03G0181500,OS01G0197100,OS02G0626100,OS10G0317900,OS10G0517500,OS05G0413000,OS02G0713700,OS01G0143300,OS01G0926300,OS03G0819600,OS03G0389700,OS05G0135700,OS05G0413400,OS09G0432900,OS09G0568400,OS02G0205500,OS07G0572…
GO:BP	cellular nitrogen compound biosynthetic process	GO:0044271	4.076199496384434e-21		2719	801	140	38866	OS01G0952800,OS01G0566800,OS04G0572400,OS02G0677300,OS12G0601300,OS08G0474000,OS01G0723000,OS05G0442700,OS06G0131700,OS12G0572000,OS09G0522200,OS05G0413000,OS02G0713700,OS01G0143300,OS09G0568400,OS07G0572900,OS03G0341100,OS06G0550000,OS12G0268000,OS08G0524800,OS08G0130500,OS01G0205500,OS01G0584900,OS05G0207300,OS02G0699600,OS12G0150100,OS07G0674700,OS04G0519700,OS01G0231700,OS04G0376000,OS04G0610…
GO:BP	cellular macromolecule biosynthetic process	GO:0034645	2.6126194185925613e-18		2788	801	136	38866	OS01G0952800,OS01G0566800,OS04G0572400,OS02G0677300,OS12G0601300,OS08G0474000,OS01G0723000,OS05G0442700,OS06G0131700,OS12G0572000,OS09G0522200,OS05G0413000,OS02G0713700,OS01G0143300,OS09G0432900,OS09G0568400,OS07G0572900,OS03G0341100,OS06G0550000,OS08G0524800,OS08G0130500,OS01G0205500,OS01G0584900,OS05G0207300,OS02G0699600,OS12G0150100,OS07G0674700,OS04G0519700,OS01G0231700,OS04G0376000,OS04G0610…
GO:BP	macromolecule biosynthetic process	GO:0009059	5.514628429330632e-18		2844	801	137	38866	OS01G0952800,OS01G0566800,OS04G0572400,OS02G0677300,OS12G0601300,OS08G0474000,OS01G0723000,OS05G0442700,OS06G0131700,OS12G0572000,OS09G0522200,OS05G0413000,OS02G0713700,OS01G0143300,OS09G0432900,OS09G0568400,OS07G0572900,OS03G0341100,OS06G0550000,OS08G0524800,OS08G0130500,OS01G0205500,OS01G0584900,OS05G0207300,OS02G0699600,OS12G0150100,OS07G0674700,OS04G0519700,OS01G0231700,OS04G0376000,OS04G0610…
GO:BP	gene expression	GO:0010467	5.752569623850503e-16	2.1906	3101	801	140	38866	OS01G0952800,OS01G0566800,OS04G0572400,OS02G0677300,OS12G0601300,OS08G0474000,OS01G0723000,OS05G0442700,OS06G0131700,OS12G0572000,OS01G0705700,OS09G0522200,OS05G0413000,OS02G0713700,OS01G0143300,OS03G0597600,OS09G0568400,OS07G0572900,OS03G0341100,OS06G0550000,OS08G0524800,OS08G0130500,OS01G0205500,OS01G0584900,OS05G0207300,OS02G0699600,OS12G0150100,OS07G0674700,OS04G0519700,OS01G0231700,OS04G0376…
GO:BP	biological_process	GO:0008150	1.6822608466754687e-15	1.38837	15028	801	430	38866	OS01G0878900,OS01G0952800,OS09G0307300,OS01G0720500,OS01G0566800,OS04G0572400,OS02G0677300,OS04G0460300,OS11G0151400,OS12G0601300,OS04G0101400,OS01G0872600,OS11G0460800,OS08G0474000,OS04G0571600,OS10G0528900,OS01G0723000,OS06G0610800,OS10G0109300,OS05G0442700,OS09G0500900,OS10G0533500,OS06G0681600,OS06G0131700,OS03G0767000,OS12G0572000,OS01G0882800,OS01G0263300,OS08G0371200,OS05G0550300,OS08G0531…
GO:BP	organonitrogen compound metabolic process	GO:1901564	4.744704762040558e-15	1.8349	5183	801	196	38866	OS01G0952800,OS09G0307300,OS01G0720500,OS11G0460800,OS10G0528900,OS01G0723000,OS06G0610800,OS02G0503900,OS02G0626100,OS08G0124500,OS10G0517500,OS02G0182600,OS10G0524600,OS04G0548400,OS01G0143300,OS04G0418500,OS02G0171100,OS06G0304600,OS02G0540700,OS03G0389700,OS03G0597600,OS09G0432900,OS09G0568400,OS05G0127300,OS07G0572900,OS03G0341100,OS06G0550000,OS12G0268000,OS08G0130500,OS01G0205500,OS10G0545…
GO:BP	cellular nitrogen compound metabolic process	GO:0034641	4.869048925610941e-15	1.94542	4265	801	171	38866	OS01G0952800,OS01G0566800,OS04G0572400,OS02G0677300,OS12G0601300,OS08G0474000,OS10G0528900,OS01G0723000,OS05G0442700,OS06G0131700,OS12G0572000,OS09G0522200,OS02G0503900,OS05G0413000,OS02G0713700,OS01G0143300,OS02G0171100,OS03G0597600,OS09G0568400,OS07G0572900,OS03G0341100,OS06G0550000,OS12G0268000,OS08G0524800,OS08G0130500,OS01G0205500,OS01G0584900,OS05G0207300,OS02G0699600,OS12G0150100,OS01G0371…
GO:BP	metabolic process	GO:0008152	3.77639162965633e-14	1.47023	11320	801	343	38866	OS01G0878900,OS01G0952800,OS09G0307300,OS01G0720500,OS01G0566800,OS04G0572400,OS02G0677300,OS11G0151400,OS12G0601300,OS04G0101400,OS11G0460800,OS08G0474000,OS10G0528900,OS01G0723000,OS06G0610800,OS10G0109300,OS05G0442700,OS09G0500900,OS10G0533500,OS06G0681600,OS06G0131700,OS03G0767000,OS12G0572000,OS01G0263300,OS08G0371200,OS08G0531000,OS01G0705700,OS09G0522200,OS02G0503900,OS03G0181500,OS01G0197…
GO:BP	cellular metabolic process	GO:0044237	1.8294150934176514e-13	1.53095	9318	801	294	38866	OS01G0878900,OS01G0952800,OS09G0307300,OS01G0720500,OS01G0566800,OS04G0572400,OS02G0677300,OS12G0601300,OS08G0474000,OS10G0528900,OS01G0723000,OS10G0109300,OS05G0442700,OS06G0681600,OS06G0131700,OS03G0767000,OS12G0572000,OS01G0263300,OS08G0531000,OS09G0522200,OS02G0503900,OS03G0181500,OS02G0626100,OS08G0124500,OS10G0517500,OS02G0182600,OS05G0413000,OS04G0548400,OS02G0713700,OS01G0143300,OS04G0418…
GO:BP	ribosome assembly	GO:0042255	8.193341935299328e-13	11.9729	77	801	19	38866	OS06G0550000,OS08G0130500,OS01G0205500,OS05G0207300,OS02G0699600,OS04G0598200,OS04G0473400,OS03G0798600,OS05G0513500,OS02G0591700,OS11G0482000,OS05G0144200,OS02G0478700,OS04G0346100,OS02G0534800,OS03G0424500,OS05G0486700,OS03G0424800,OS10G0411700
GO:BP	cellular process	GO:0009987	7.962225790047497e-12	1.43448	11230	801	332	38866	OS01G0878900,OS01G0952800,OS09G0307300,OS01G0720500,OS01G0566800,OS04G0572400,OS02G0677300,OS12G0601300,OS08G0474000,OS10G0528900,OS01G0723000,OS10G0109300,OS05G0442700,OS06G0681600,OS06G0131700,OS03G0767000,OS12G0572000,OS01G0263300,OS08G0531000,OS09G0522200,OS02G0503900,OS03G0181500,OS02G0626100,OS05G0489800,OS01G0257100,OS08G0124500,OS10G0517500,OS02G0182600,OS05G0413000,OS04G0548400,OS02G0713…
GO:BP	ribosomal large subunit biogenesis	GO:0042273	9.325637011945255e-11		98	801	19	38866	OS06G0550000,OS08G0130500,OS01G0205500,OS05G0207300,OS02G0699600,OS12G0150100,OS04G0376000,OS04G0598200,OS11G0151300,OS01G0140500,OS04G0473400,OS04G0515300,OS05G0513500,OS02G0591700,OS05G0556900,OS05G0144200,OS02G0785800,OS03G0241200,OS05G0486700
GO:BP	organic substance metabolic process	GO:0071704	1.4046320014342817e-10	1.46108	9664	801	291	38866	OS01G0952800,OS09G0307300,OS01G0720500,OS01G0566800,OS04G0572400,OS02G0677300,OS12G0601300,OS04G0101400,OS11G0460800,OS08G0474000,OS10G0528900,OS01G0723000,OS06G0610800,OS05G0442700,OS10G0533500,OS06G0131700,OS03G0767000,OS12G0572000,OS01G0705700,OS09G0522200,OS02G0503900,OS03G0181500,OS01G0197100,OS02G0626100,OS10G0317900,OS08G0124500,OS10G0517500,OS02G0182600,OS05G0413000,OS10G0524600,OS04G0548…
GO:BP	cellular protein metabolic process	GO:0044267	2.1703903121240057e-10	1.84228	3819	801	145	38866	OS09G0307300,OS01G0720500,OS01G0723000,OS08G0124500,OS02G0182600,OS04G0548400,OS01G0143300,OS04G0418500,OS02G0540700,OS09G0432900,OS09G0568400,OS05G0127300,OS07G0572900,OS03G0341100,OS06G0550000,OS08G0130500,OS01G0205500,OS10G0545800,OS05G0207300,OS02G0699600,OS12G0150100,OS02G0194600,OS02G0681700,OS01G0972000,OS07G0674700,OS01G0231700,OS01G0152000,OS04G0376000,OS06G0172600,OS04G0598200,OS03G0422…
GO:BP	nitrogen compound metabolic process	GO:0006807	2.720479848736366e-10	1.523	7933	801	249	38866	OS01G0952800,OS09G0307300,OS01G0720500,OS01G0566800,OS04G0572400,OS02G0677300,OS12G0601300,OS11G0460800,OS08G0474000,OS10G0528900,OS01G0723000,OS06G0610800,OS05G0442700,OS06G0131700,OS12G0572000,OS09G0522200,OS02G0503900,OS02G0626100,OS08G0124500,OS10G0517500,OS02G0182600,OS05G0413000,OS10G0524600,OS04G0548400,OS02G0713700,OS01G0143300,OS04G0418500,OS02G0171100,OS06G0304600,OS02G0540700,OS03G0389…
GO:BP	protein metabolic process	GO:0019538	4.2265370281553423e-10	1.77602	4262	801	156	38866	OS09G0307300,OS01G0720500,OS11G0460800,OS01G0723000,OS06G0610800,OS08G0124500,OS02G0182600,OS10G0524600,OS04G0548400,OS01G0143300,OS04G0418500,OS06G0304600,OS02G0540700,OS03G0597600,OS09G0432900,OS09G0568400,OS05G0127300,OS07G0572900,OS03G0341100,OS06G0550000,OS08G0130500,OS01G0205500,OS10G0545800,OS05G0207300,OS02G0699600,OS12G0150100,OS02G0194600,OS02G0681700,OS01G0972000,OS07G0674700,OS01G0231…
GO:BP	cellular macromolecule metabolic process	GO:0044260	1.0945797843400004e-8	1.57788	6058	801	197	38866	OS01G0952800,OS09G0307300,OS01G0720500,OS01G0566800,OS04G0572400,OS02G0677300,OS12G0601300,OS08G0474000,OS01G0723000,OS05G0442700,OS06G0131700,OS12G0572000,OS09G0522200,OS08G0124500,OS02G0182600,OS05G0413000,OS04G0548400,OS02G0713700,OS01G0143300,OS04G0418500,OS02G0540700,OS09G0432900,OS09G0568400,OS05G0127300,OS07G0572900,OS03G0341100,OS06G0550000,OS08G0524800,OS08G0130500,OS01G0205500,OS01G0584…
GO:BP	ribosome biogenesis	GO:0042254	1.8009216333274737e-8		295	801	28	38866	OS06G0550000,OS08G0130500,OS01G0205500,OS05G0207300,OS02G0699600,OS12G0150100,OS04G0376000,OS04G0598200,OS04G0608400,OS11G0151300,OS01G0140500,OS04G0473400,OS04G0515300,OS03G0798600,OS05G0513500,OS02G0591700,OS05G0556900,OS11G0482000,OS05G0144200,OS02G0478700,OS02G0785800,OS04G0346100,OS02G0534800,OS03G0424500,OS03G0241200,OS05G0486700,OS03G0424800,OS10G0411700
GO:BP	primary metabolic process	GO:0044238	3.274596275067275e-8	1.4279	9107	801	268	38866	OS01G0952800,OS09G0307300,OS01G0720500,OS01G0566800,OS04G0572400,OS02G0677300,OS12G0601300,OS11G0460800,OS08G0474000,OS01G0723000,OS06G0610800,OS05G0442700,OS10G0533500,OS06G0131700,OS03G0767000,OS12G0572000,OS09G0522200,OS03G0181500,OS01G0197100,OS02G0626100,OS08G0124500,OS10G0517500,OS02G0182600,OS05G0413000,OS10G0524600,OS04G0548400,OS02G0713700,OS01G0143300,OS04G0418500,OS02G0171100,OS01G0926…
GO:BP	organelle assembly	GO:0070925	6.046253583106702e-8		156	801	20	38866	OS06G0550000,OS08G0130500,OS01G0205500,OS05G0207300,OS02G0699600,OS04G0598200,OS02G0620100,OS04G0473400,OS03G0798600,OS05G0513500,OS02G0591700,OS11G0482000,OS05G0144200,OS02G0478700,OS04G0346100,OS02G0534800,OS03G0424500,OS05G0486700,OS03G0424800,OS10G0411700
GO:BP	cytoplasmic translation	GO:0002181	7.992172949615648e-7	9.27624	68	801	13	38866	OS08G0130500,OS12G0150100,OS12G0567700,OS11G0151300,OS01G0140500,OS04G0473400,OS02G0591700,OS05G0556900,OS09G0485900,OS03G0598800,OS08G0116500,OS02G0785800,OS05G0459900
GO:BP	ribosomal large subunit assembly	GO:0000027	9.391208864382288e-7		45	801	11	38866	OS06G0550000,OS08G0130500,OS01G0205500,OS05G0207300,OS02G0699600,OS04G0598200,OS04G0473400,OS05G0513500,OS02G0591700,OS05G0144200,OS05G0486700
GO:BP	ribonucleoprotein complex assembly	GO:0022618	0.0000018628620246531053		170	801	19	38866	OS06G0550000,OS08G0130500,OS01G0205500,OS05G0207300,OS02G0699600,OS04G0598200,OS04G0473400,OS03G0798600,OS05G0513500,OS02G0591700,OS11G0482000,OS05G0144200,OS02G0478700,OS04G0346100,OS02G0534800,OS03G0424500,OS05G0486700,OS03G0424800,OS10G0411700
GO:BP	ribonucleoprotein complex subunit organization	GO:0071826	0.000004018162009172467		178	801	19	38866	OS06G0550000,OS08G0130500,OS01G0205500,OS05G0207300,OS02G0699600,OS04G0598200,OS04G0473400,OS03G0798600,OS05G0513500,OS02G0591700,OS11G0482000,OS05G0144200,OS02G0478700,OS04G0346100,OS02G0534800,OS03G0424500,OS05G0486700,OS03G0424800,OS10G0411700
GO:BP	macromolecule metabolic process	GO:0043170	0.000007688546544299174	1.42251	7436	801	218	38866	OS01G0952800,OS09G0307300,OS01G0720500,OS01G0566800,OS04G0572400,OS02G0677300,OS12G0601300,OS11G0460800,OS08G0474000,OS01G0723000,OS06G0610800,OS05G0442700,OS06G0131700,OS12G0572000,OS01G0705700,OS09G0522200,OS08G0124500,OS02G0182600,OS05G0413000,OS10G0524600,OS04G0548400,OS02G0713700,OS01G0143300,OS04G0418500,OS06G0304600,OS02G0540700,OS03G0597600,OS09G0432900,OS09G0568400,OS05G0127300,OS07G0572…
GO:BP	protein-containing complex assembly	GO:0065003	0.000007865371015909193		487	801	32	38866	OS05G0489800,OS10G0517500,OS06G0550000,OS08G0130500,OS01G0205500,OS10G0545800,OS05G0207300,OS02G0699600,OS05G0404300,OS04G0598200,OS02G0312700,OS02G0620100,OS05G0400400,OS04G0473400,OS03G0798600,OS05G0513500,OS02G0591700,OS03G0806900,OS01G0273000,OS04G0428900,OS11G0482000,OS05G0144200,OS03G0766900,OS02G0478700,OS07G0644000,OS04G0346100,OS02G0534800,OS03G0424500,OS05G0486700,OS03G0424800,OS01G0254…
GO:BP	ribonucleoprotein complex biogenesis	GO:0022613	0.000007906450443423806		386	801	28	38866	OS06G0550000,OS08G0130500,OS01G0205500,OS05G0207300,OS02G0699600,OS12G0150100,OS04G0376000,OS04G0598200,OS04G0608400,OS11G0151300,OS01G0140500,OS04G0473400,OS04G0515300,OS03G0798600,OS05G0513500,OS02G0591700,OS05G0556900,OS11G0482000,OS05G0144200,OS02G0478700,OS02G0785800,OS04G0346100,OS02G0534800,OS03G0424500,OS03G0241200,OS05G0486700,OS03G0424800,OS10G0411700
GO:BP	cellular protein-containing complex assembly	GO:0034622	0.0000079943365238628		436	801	30	38866	OS05G0489800,OS06G0550000,OS08G0130500,OS01G0205500,OS10G0545800,OS05G0207300,OS02G0699600,OS05G0404300,OS04G0598200,OS02G0312700,OS02G0620100,OS05G0400400,OS04G0473400,OS03G0798600,OS05G0513500,OS02G0591700,OS03G0806900,OS01G0273000,OS04G0428900,OS11G0482000,OS05G0144200,OS03G0766900,OS02G0478700,OS07G0644000,OS04G0346100,OS02G0534800,OS03G0424500,OS05G0486700,OS03G0424800,OS10G0411700
GO:BP	ribosomal small subunit assembly	GO:0000028	0.000011358024701143419		24	801	8	38866	OS03G0798600,OS11G0482000,OS02G0478700,OS04G0346100,OS02G0534800,OS03G0424500,OS03G0424800,OS10G0411700
GO:BP	protein-containing complex subunit organization	GO:0043933	0.000032205773621230764	2.88417	572	801	34	38866	OS05G0489800,OS10G0517500,OS06G0550000,OS08G0130500,OS01G0205500,OS10G0545800,OS05G0207300,OS02G0699600,OS05G0404300,OS04G0598200,OS02G0312700,OS02G0620100,OS05G0400400,OS04G0473400,OS03G0798600,OS05G0513500,OS02G0591700,OS03G0806900,OS01G0200500,OS01G0273000,OS04G0428900,OS11G0482000,OS05G0144200,OS03G0766900,OS02G0478700,OS07G0295400,OS07G0644000,OS04G0346100,OS02G0534800,OS03G0424500,OS05G0486…
GO:BP	cellular component assembly	GO:0022607	0.00010125441130200571		629	801	35	38866	OS05G0489800,OS10G0517500,OS06G0550000,OS08G0130500,OS01G0205500,OS10G0545800,OS05G0207300,OS02G0699600,OS05G0404300,OS04G0598200,OS02G0312700,OS02G0697400,OS02G0620100,OS05G0400400,OS05G0568100,OS04G0473400,OS03G0798600,OS05G0513500,OS02G0591700,OS03G0806900,OS01G0273000,OS04G0428900,OS11G0482000,OS05G0144200,OS03G0766900,OS02G0478700,OS05G0155300,OS07G0644000,OS04G0346100,OS02G0534800,OS03G0424…
GO:BP	oxidation-reduction process	GO:0055114	0.00013460339960986122	1.88209	1882	801	73	38866	OS01G0878900,OS11G0151400,OS04G0101400,OS10G0109300,OS09G0500900,OS10G0533500,OS06G0681600,OS03G0767000,OS01G0263300,OS08G0371200,OS02G0503900,OS01G0197100,OS04G0337500,OS10G0317900,OS04G0483500,OS02G0171100,OS01G0926300,OS09G0127300,OS10G0513900,OS09G0498500,OS05G0499400,OS03G0417700,OS09G0354300,OS08G0417100,OS12G0268000,OS01G0294700,OS06G0625500,OS04G0182200,OS10G0320100,OS05G0495700,OS01G0194…
GO:BP	cellular component biogenesis	GO:0044085	0.00021091639765116084		986	801	46	38866	OS05G0489800,OS10G0517500,OS06G0550000,OS08G0130500,OS01G0205500,OS10G0545800,OS05G0207300,OS02G0699600,OS12G0150100,OS05G0404300,OS04G0376000,OS04G0598200,OS02G0312700,OS04G0608400,OS02G0697400,OS02G0620100,OS11G0151300,OS05G0400400,OS05G0568100,OS10G0205300,OS02G0275200,OS01G0140500,OS04G0473400,OS04G0515300,OS03G0798600,OS05G0513500,OS02G0591700,OS03G0806900,OS05G0556900,OS01G0273000,OS04G0428…
GO:BP	small molecule metabolic process	GO:0044281	0.0017571238551311597	1.95828	1338	801	54	38866	OS03G0767000,OS02G0503900,OS03G0181500,OS02G0626100,OS10G0517500,OS02G0171100,OS01G0926300,OS03G0389700,OS03G0597600,OS05G0135700,OS02G0205500,OS12G0268000,OS07G0190800,OS09G0110300,OS09G0539800,OS02G0504000,OS07G0190000,OS05G0549700,OS03G0757900,OS05G0367400,OS01G0151400,OS08G0206600,OS07G0674100,OS10G0550900,OS01G0612200,OS03G0157900,OS01G0624000,OS01G0557100,OS07G0495200,OS12G0541000,OS06G0137…
GO:BP	response to stress	GO:0006950	0.00469054077306821	1.87937	1420	801	55	38866	OS01G0952800,OS10G0109300,OS06G0681600,OS03G0767000,OS12G0572000,OS01G0263300,OS01G0705700,OS03G0181500,OS08G0124500,OS10G0517500,OS05G0499400,OS03G0696000,OS12G0268000,OS01G0294700,OS06G0625500,OS09G0439200,OS04G0233400,OS09G0110300,OS06G0163400,OS05G0579100,OS03G0133000,OS05G0382600,OS04G0608400,OS03G0315400,OS03G0821300,OS08G0206600,OS01G0542000,OS01G0193600,OS01G0686800,OS03G0429000,OS03G0181…
GO:BP	response to acid chemical	GO:0001101	0.008229952729782818	2.78305	401	801	23	38866	OS03G0767000,OS12G0572000,OS01G0705700,OS10G0517500,OS03G0696000,OS09G0439200,OS04G0233400,OS09G0110300,OS01G0826400,OS03G0133000,OS05G0382600,OS03G0315400,OS03G0181100,OS03G0297600,OS02G0625300,OS03G0402800,OS07G0615200,OS03G0438100,OS11G0445300,OS03G0158200,OS08G0459600,OS02G0115700,OS09G0466900
GO:BP	response to wounding	GO:0009611	0.009312409855816396	7.18842	54	801	8	38866	OS03G0767000,OS01G0705700,OS09G0439200,OS03G0181100,OS03G0402800,OS07G0615200,OS03G0438100,OS11G0445300
GO:BP	intracellular transport	GO:0046907	0.009941912916146732		614	801	30	38866	OS03G0114900,OS04G0608400,OS05G0465100,OS12G0103300,OS01G0612200,OS01G0732000,OS12G0438900,OS01G0593600,OS04G0446300,OS03G0788200,OS03G0783700,OS01G0200500,OS03G0711400,OS03G0240700,OS01G0273000,OS03G0186800,OS07G0604500,OS01G0856600,OS05G0574500,OS01G0844400,OS03G0158200,OS09G0347500,OS09G0386400,OS01G0868200,OS07G0295400,OS06G0653900,OS03G0112400,OS05G0350600,OS01G0254000,OS01G0558600
GO:BP	cellular protein localization	GO:0034613	0.011558833098267806		588	801	29	38866	OS03G0114900,OS04G0608400,OS05G0465100,OS02G0620100,OS12G0103300,OS01G0732000,OS12G0438900,OS01G0593600,OS04G0446300,OS03G0783700,OS01G0200500,OS03G0711400,OS03G0240700,OS01G0273000,OS03G0186800,OS07G0604500,OS01G0856600,OS05G0574500,OS08G0309300,OS01G0844400,OS03G0158200,OS09G0347500,OS09G0386400,OS01G0868200,OS07G0295400,OS06G0653900,OS03G0112400,OS01G0254000,OS01G0558600
GO:BP	intracellular protein transport	GO:0006886	0.011894664534246483	2.53327	498	801	26	38866	OS03G0114900,OS04G0608400,OS05G0465100,OS12G0103300,OS01G0732000,OS12G0438900,OS04G0446300,OS03G0783700,OS01G0200500,OS03G0711400,OS03G0240700,OS01G0273000,OS03G0186800,OS07G0604500,OS01G0856600,OS05G0574500,OS01G0844400,OS03G0158200,OS09G0347500,OS09G0386400,OS01G0868200,OS07G0295400,OS06G0653900,OS03G0112400,OS01G0254000,OS01G0558600
GO:BP	protein localization to organelle	GO:0033365	0.013184749174215207		250	801	17	38866	OS03G0114900,OS04G0608400,OS02G0620100,OS12G0103300,OS01G0732000,OS12G0438900,OS01G0593600,OS04G0446300,OS01G0200500,OS03G0240700,OS03G0186800,OS07G0604500,OS01G0856600,OS05G0574500,OS08G0309300,OS09G0347500,OS07G0295400
GO:BP	cellular macromolecule localization	GO:0070727	0.013918414281966435		594	801	29	38866	OS03G0114900,OS04G0608400,OS05G0465100,OS02G0620100,OS12G0103300,OS01G0732000,OS12G0438900,OS01G0593600,OS04G0446300,OS03G0783700,OS01G0200500,OS03G0711400,OS03G0240700,OS01G0273000,OS03G0186800,OS07G0604500,OS01G0856600,OS05G0574500,OS08G0309300,OS01G0844400,OS03G0158200,OS09G0347500,OS09G0386400,OS01G0868200,OS07G0295400,OS06G0653900,OS03G0112400,OS01G0254000,OS01G0558600
GO:BP	oxoacid metabolic process	GO:0043436	0.014750713139129644		853	801	37	38866	OS03G0767000,OS02G0503900,OS03G0181500,OS02G0626100,OS10G0517500,OS02G0171100,OS01G0926300,OS03G0389700,OS03G0597600,OS02G0205500,OS12G0268000,OS09G0110300,OS09G0539800,OS02G0504000,OS05G0549700,OS03G0757900,OS01G0151400,OS10G0550900,OS03G0157900,OS01G0624000,OS01G0557100,OS08G0339200,OS04G0550500,OS02G0626400,OS03G0438100,OS06G0708832,OS04G0463500,OS03G0760200,OS11G0256000,OS04G0669500,OS12G0482…
GO:BP	organic acid metabolic process	GO:0006082	0.01550340398858326		855	801	37	38866	OS03G0767000,OS02G0503900,OS03G0181500,OS02G0626100,OS10G0517500,OS02G0171100,OS01G0926300,OS03G0389700,OS03G0597600,OS02G0205500,OS12G0268000,OS09G0110300,OS09G0539800,OS02G0504000,OS05G0549700,OS03G0757900,OS01G0151400,OS10G0550900,OS03G0157900,OS01G0624000,OS01G0557100,OS08G0339200,OS04G0550500,OS02G0626400,OS03G0438100,OS06G0708832,OS04G0463500,OS03G0760200,OS11G0256000,OS04G0669500,OS12G0482…
GO:BP	response to jasmonic acid	GO:0009753	0.018128993734893826	6.57923	59	801	8	38866	OS03G0767000,OS12G0572000,OS09G0439200,OS03G0181100,OS03G0402800,OS07G0615200,OS03G0438100,OS11G0445300
GO:BP	establishment of localization in cell	GO:0051649	0.027748685726620877		649	801	30	38866	OS03G0114900,OS04G0608400,OS05G0465100,OS12G0103300,OS01G0612200,OS01G0732000,OS12G0438900,OS01G0593600,OS04G0446300,OS03G0788200,OS03G0783700,OS01G0200500,OS03G0711400,OS03G0240700,OS01G0273000,OS03G0186800,OS07G0604500,OS01G0856600,OS05G0574500,OS01G0844400,OS03G0158200,OS09G0347500,OS09G0386400,OS01G0868200,OS07G0295400,OS06G0653900,OS03G0112400,OS05G0350600,OS01G0254000,OS01G0558600
GO:BP	small molecule biosynthetic process	GO:0044283	0.030821577005924247		558	801	27	38866	OS03G0767000,OS03G0181500,OS02G0626100,OS10G0517500,OS01G0926300,OS03G0389700,OS02G0205500,OS09G0539800,OS07G0190000,OS03G0757900,OS01G0151400,OS03G0157900,OS01G0624000,OS12G0541000,OS04G0550500,OS02G0626400,OS04G0576800,OS03G0438100,OS06G0708832,OS04G0463500,OS11G0256000,OS05G0182201,OS12G0482700,OS12G0138900,OS12G0548300,OS08G0459600,OS04G0379900
GO:BP	carboxylic acid biosynthetic process	GO:0046394	0.034305356282723076	2.60361	410	801	22	38866	OS03G0767000,OS03G0181500,OS02G0626100,OS10G0517500,OS01G0926300,OS03G0389700,OS02G0205500,OS09G0539800,OS03G0757900,OS01G0151400,OS03G0157900,OS01G0624000,OS04G0550500,OS02G0626400,OS03G0438100,OS06G0708832,OS04G0463500,OS11G0256000,OS12G0482700,OS12G0138900,OS08G0459600,OS04G0379900
GO:BP	organic acid biosynthetic process	GO:0016053	0.034305356282723076		410	801	22	38866	OS03G0767000,OS03G0181500,OS02G0626100,OS10G0517500,OS01G0926300,OS03G0389700,OS02G0205500,OS09G0539800,OS03G0757900,OS01G0151400,OS03G0157900,OS01G0624000,OS04G0550500,OS02G0626400,OS03G0438100,OS06G0708832,OS04G0463500,OS11G0256000,OS12G0482700,OS12G0138900,OS08G0459600,OS04G0379900
GO:BP	aerobic respiration	GO:0009060	0.03558273476135347	5.26141	83	801	9	38866	OS08G0120000,OS01G0612200,OS05G0400400,OS01G0935900,OS03G0806900,OS02G0541700,OS04G0418000,OS08G0112800,OS06G0124900
GO:BP	ribosomal small subunit biogenesis	GO:0042274	0.04137469667079681		66	801	8	38866	OS03G0798600,OS11G0482000,OS02G0478700,OS04G0346100,OS02G0534800,OS03G0424500,OS03G0424800,OS10G0411700
GO:BP	secondary metabolic process	GO:0019748	0.049002146617142354	3.85604	151	801	12	38866	OS01G0952800,OS11G0460800,OS02G0503900,OS02G0626100,OS01G0926300,OS02G0177600,OS02G0504000,OS02G0697400,OS08G0448000,OS02G0626400,OS03G0760200,OS10G0430200
GO:CC	cytosolic ribosome	GO:0022626	2.317087340479179e-54		207	801	64	38866	OS07G0572900,OS03G0341100,OS06G0550000,OS08G0130500,OS01G0205500,OS05G0207300,OS02G0699600,OS12G0150100,OS07G0674700,OS04G0376000,OS06G0172600,OS04G0598200,OS03G0408300,OS08G0117300,OS12G0567700,OS01G0686800,OS03G0807800,OS02G0284600,OS11G0151300,OS07G0208000,OS07G0674200,OS07G0613200,OS11G0602500,OS02G0804100,OS01G0834500,OS03G0756000,OS07G0180900,OS01G0834600,OS01G0140500,OS04G0473400,OS04G0515…
GO:CC	ribosomal subunit	GO:0044391	6.769450806356908e-53		236	801	66	38866	OS07G0572900,OS03G0341100,OS06G0550000,OS08G0130500,OS01G0205500,OS05G0207300,OS02G0699600,OS12G0150100,OS07G0674700,OS04G0376000,OS06G0172600,OS04G0598200,OS03G0408300,OS08G0117300,OS12G0567700,OS01G0686800,OS03G0807800,OS02G0284600,OS11G0151300,OS07G0208000,OS07G0674200,OS07G0613200,OS11G0602500,OS02G0804100,OS01G0834500,OS03G0756000,OS07G0180900,OS01G0834600,OS01G0140500,OS01G0571200,OS04G0473…
GO:CC	ribosome	GO:0005840	9.814427039557964e-51		378	801	77	38866	OS09G0568400,OS07G0572900,OS03G0341100,OS06G0550000,OS08G0130500,OS01G0205500,OS05G0207300,OS02G0699600,OS12G0150100,OS07G0674700,OS01G0231700,OS04G0376000,OS06G0172600,OS04G0598200,OS03G0408300,OS08G0120000,OS08G0117300,OS12G0567700,OS01G0686800,OS03G0807800,OS02G0284600,OS11G0151300,OS07G0208000,OS01G0328400,OS07G0674200,OS07G0613200,OS11G0602500,OS02G0804100,OS01G0834500,OS03G0756000,OS07G0180…
GO:CC	cytosolic part	GO:0044445	4.714966808422667e-49		246	801	64	38866	OS07G0572900,OS03G0341100,OS06G0550000,OS08G0130500,OS01G0205500,OS05G0207300,OS02G0699600,OS12G0150100,OS07G0674700,OS04G0376000,OS06G0172600,OS04G0598200,OS03G0408300,OS08G0117300,OS12G0567700,OS01G0686800,OS03G0807800,OS02G0284600,OS11G0151300,OS07G0208000,OS07G0674200,OS07G0613200,OS11G0602500,OS02G0804100,OS01G0834500,OS03G0756000,OS07G0180900,OS01G0834600,OS01G0140500,OS04G0473400,OS04G0515…
GO:CC	cellular_component	GO:0005575	5.702144153490332e-34		15469	801	493	38866	OS01G0952800,OS09G0307300,OS01G0720500,OS04G0572400,OS02G0677300,OS04G0460300,OS05G0527800,OS06G0244700,OS11G0151400,OS12G0601300,OS04G0101400,OS01G0872600,OS08G0474000,OS04G0571600,OS10G0528900,OS01G0723000,OS10G0109300,OS11G0644700,OS05G0442700,OS06G0572400,OS09G0500900,OS10G0533500,OS06G0681600,OS06G0131700,OS12G0561900,OS03G0767000,OS12G0572000,OS04G0525100,OS03G0114400,OS03G0300900,OS01G0882…
GO:CC	protein-containing complex	GO:0032991	1.2048928997024405e-33		2598	801	159	38866	OS01G0952800,OS01G0720500,OS01G0723000,OS05G0489800,OS03G0114900,OS09G0568400,OS08G0427700,OS07G0572900,OS03G0341100,OS06G0550000,OS06G0130900,OS08G0130500,OS01G0205500,OS05G0207300,OS02G0699600,OS12G0150100,OS05G0495700,OS07G0674700,OS01G0231700,OS04G0376000,OS05G0579100,OS06G0172600,OS02G0553600,OS04G0598200,OS04G0295000,OS04G0608400,OS03G0408300,OS02G0189100,OS02G0315400,OS08G0120000,OS08G0117…
GO:CC	ribonucleoprotein complex	GO:1990904	1.7941981703441675e-33		757	801	83	38866	OS01G0723000,OS09G0568400,OS07G0572900,OS03G0341100,OS06G0550000,OS08G0130500,OS01G0205500,OS05G0207300,OS02G0699600,OS12G0150100,OS07G0674700,OS01G0231700,OS04G0376000,OS06G0172600,OS04G0598200,OS03G0408300,OS08G0120000,OS08G0117300,OS12G0567700,OS01G0686800,OS03G0807800,OS02G0284600,OS11G0151300,OS07G0208000,OS01G0328400,OS07G0674200,OS07G0613200,OS11G0602500,OS02G0804100,OS01G0834500,OS03G0756…
GO:CC	intracellular part	GO:0044424	1.8989981296864177e-31		9323	801	346	38866	OS01G0952800,OS09G0307300,OS01G0720500,OS04G0572400,OS02G0677300,OS05G0527800,OS06G0244700,OS12G0601300,OS08G0474000,OS10G0528900,OS01G0723000,OS05G0442700,OS06G0131700,OS12G0561900,OS03G0767000,OS12G0572000,OS04G0525100,OS03G0300900,OS01G0705700,OS09G0522200,OS03G0181500,OS02G0626100,OS06G0637500,OS05G0489800,OS07G0503500,OS10G0517500,OS04G0483500,OS05G0413000,OS09G0458700,OS02G0713700,OS01G0143…
GO:CC	cytosolic large ribosomal subunit	GO:0022625	2.285233498849304e-31		117	801	37	38866	OS03G0341100,OS06G0550000,OS08G0130500,OS01G0205500,OS05G0207300,OS02G0699600,OS12G0150100,OS07G0674700,OS04G0376000,OS04G0598200,OS03G0408300,OS12G0567700,OS02G0284600,OS11G0151300,OS07G0674200,OS07G0613200,OS03G0756000,OS07G0180900,OS01G0140500,OS04G0473400,OS04G0515300,OS05G0155100,OS03G0796501,OS02G0591700,OS01G0752300,OS05G0556900,OS09G0485900,OS02G0111700,OS07G0109500,OS03G0598800,OS08G0116…
GO:CC	cytoplasm	GO:0005737	2.330187319923139e-31		6073	801	261	38866	OS01G0720500,OS10G0528900,OS01G0723000,OS03G0767000,OS03G0300900,OS03G0181500,OS02G0626100,OS10G0517500,OS04G0483500,OS05G0413000,OS09G0458700,OS01G0143300,OS03G0114900,OS02G0171100,OS01G0926300,OS03G0389700,OS03G0597600,OS05G0135700,OS09G0432900,OS09G0568400,OS07G0572900,OS03G0341100,OS06G0550000,OS12G0268000,OS06G0625500,OS08G0130500,OS01G0205500,OS09G0439200,OS10G0545800,OS05G0207300,OS02G0699…
GO:CC	intracellular	GO:0005622	2.5970697840926447e-31		9337	801	346	38866	OS01G0952800,OS09G0307300,OS01G0720500,OS04G0572400,OS02G0677300,OS05G0527800,OS06G0244700,OS12G0601300,OS08G0474000,OS10G0528900,OS01G0723000,OS05G0442700,OS06G0131700,OS12G0561900,OS03G0767000,OS12G0572000,OS04G0525100,OS03G0300900,OS01G0705700,OS09G0522200,OS03G0181500,OS02G0626100,OS06G0637500,OS05G0489800,OS07G0503500,OS10G0517500,OS04G0483500,OS05G0413000,OS09G0458700,OS02G0713700,OS01G0143…
GO:CC	cell	GO:0005623	3.399563495803627e-30		11289	801	390	38866	OS01G0952800,OS09G0307300,OS01G0720500,OS04G0572400,OS02G0677300,OS04G0460300,OS05G0527800,OS06G0244700,OS12G0601300,OS08G0474000,OS10G0528900,OS01G0723000,OS05G0442700,OS06G0572400,OS06G0681600,OS06G0131700,OS12G0561900,OS03G0767000,OS12G0572000,OS04G0525100,OS03G0300900,OS01G0882800,OS01G0705700,OS09G0522200,OS03G0181500,OS02G0626100,OS01G0597600,OS06G0637500,OS05G0489800,OS07G0503500,OS08G0124…
GO:CC	cell part	GO:0044464	4.0800775364238865e-30		11170	801	387	38866	OS01G0952800,OS09G0307300,OS01G0720500,OS04G0572400,OS02G0677300,OS04G0460300,OS05G0527800,OS06G0244700,OS12G0601300,OS08G0474000,OS10G0528900,OS01G0723000,OS05G0442700,OS06G0572400,OS06G0681600,OS06G0131700,OS12G0561900,OS03G0767000,OS12G0572000,OS04G0525100,OS03G0300900,OS01G0882800,OS01G0705700,OS09G0522200,OS03G0181500,OS02G0626100,OS01G0597600,OS06G0637500,OS05G0489800,OS07G0503500,OS08G0124…
GO:CC	cytosol	GO:0005829	4.886187026611295e-30		1171	801	98	38866	OS01G0723000,OS10G0517500,OS02G0171100,OS05G0135700,OS07G0572900,OS03G0341100,OS06G0550000,OS08G0130500,OS01G0205500,OS09G0439200,OS05G0207300,OS02G0699600,OS12G0150100,OS05G0495700,OS07G0674700,OS04G0376000,OS06G0172600,OS03G0757900,OS04G0598200,OS05G0367400,OS03G0224300,OS03G0408300,OS02G0567900,OS09G0547500,OS01G0542000,OS08G0117300,OS12G0567700,OS01G0686800,OS03G0807800,OS02G0284600,OS11G0151…
GO:CC	large ribosomal subunit	GO:0015934	8.169100986550957e-30		147	801	39	38866	OS03G0341100,OS06G0550000,OS08G0130500,OS01G0205500,OS05G0207300,OS02G0699600,OS12G0150100,OS07G0674700,OS04G0376000,OS04G0598200,OS03G0408300,OS12G0567700,OS02G0284600,OS11G0151300,OS07G0674200,OS07G0613200,OS03G0756000,OS07G0180900,OS01G0140500,OS01G0571200,OS04G0473400,OS04G0515300,OS05G0155100,OS03G0796501,OS05G0513500,OS02G0591700,OS01G0752300,OS05G0556900,OS09G0485900,OS02G0111700,OS07G0109…
GO:CC	cytoplasmic part	GO:0044444	6.156108504602011e-29		4927	801	223	38866	OS01G0720500,OS01G0723000,OS03G0767000,OS03G0300900,OS03G0181500,OS10G0517500,OS04G0483500,OS05G0413000,OS09G0458700,OS01G0143300,OS03G0114900,OS02G0171100,OS01G0926300,OS03G0389700,OS05G0135700,OS09G0432900,OS09G0568400,OS07G0572900,OS03G0341100,OS06G0550000,OS12G0268000,OS06G0625500,OS08G0130500,OS01G0205500,OS09G0439200,OS10G0545800,OS05G0207300,OS02G0699600,OS12G0150100,OS05G0495700,OS05G0404…
GO:CC	intracellular organelle	GO:0043229	6.168776739017867e-28		7816	801	299	38866	OS01G0952800,OS09G0307300,OS01G0720500,OS04G0572400,OS02G0677300,OS05G0527800,OS06G0244700,OS12G0601300,OS08G0474000,OS05G0442700,OS06G0131700,OS12G0561900,OS03G0767000,OS12G0572000,OS04G0525100,OS03G0300900,OS01G0705700,OS09G0522200,OS03G0181500,OS06G0637500,OS05G0489800,OS07G0503500,OS04G0483500,OS05G0413000,OS09G0458700,OS02G0713700,OS01G0143300,OS07G0510400,OS03G0114900,OS01G0926300,OS06G0288…
GO:CC	organelle	GO:0043226	8.108556136897897e-28		7828	801	299	38866	OS01G0952800,OS09G0307300,OS01G0720500,OS04G0572400,OS02G0677300,OS05G0527800,OS06G0244700,OS12G0601300,OS08G0474000,OS05G0442700,OS06G0131700,OS12G0561900,OS03G0767000,OS12G0572000,OS04G0525100,OS03G0300900,OS01G0705700,OS09G0522200,OS03G0181500,OS06G0637500,OS05G0489800,OS07G0503500,OS04G0483500,OS05G0413000,OS09G0458700,OS02G0713700,OS01G0143300,OS07G0510400,OS03G0114900,OS01G0926300,OS06G0288…
GO:CC	intracellular organelle part	GO:0044446	4.087998117776964e-27		3305	801	170	38866	OS01G0952800,OS09G0307300,OS01G0720500,OS06G0244700,OS03G0767000,OS12G0572000,OS05G0489800,OS01G0143300,OS03G0114900,OS01G0926300,OS09G0432900,OS08G0427700,OS07G0572900,OS03G0341100,OS06G0550000,OS12G0268000,OS06G0130900,OS06G0625500,OS08G0130500,OS01G0205500,OS10G0545800,OS05G0207300,OS02G0699600,OS12G0150100,OS05G0404300,OS07G0674700,OS04G0376000,OS06G0163400,OS06G0172600,OS04G0598200,OS04G0608…
GO:CC	organelle part	GO:0044422	4.870395953685552e-27		3310	801	170	38866	OS01G0952800,OS09G0307300,OS01G0720500,OS06G0244700,OS03G0767000,OS12G0572000,OS05G0489800,OS01G0143300,OS03G0114900,OS01G0926300,OS09G0432900,OS08G0427700,OS07G0572900,OS03G0341100,OS06G0550000,OS12G0268000,OS06G0130900,OS06G0625500,OS08G0130500,OS01G0205500,OS10G0545800,OS05G0207300,OS02G0699600,OS12G0150100,OS05G0404300,OS07G0674700,OS04G0376000,OS06G0163400,OS06G0172600,OS04G0598200,OS04G0608…
GO:CC	non-membrane-bounded organelle	GO:0043228	1.2026069310040542e-26		1196	801	94	38866	OS09G0307300,OS06G0244700,OS12G0572000,OS05G0489800,OS09G0568400,OS08G0427700,OS07G0572900,OS03G0341100,OS06G0550000,OS06G0130900,OS08G0130500,OS01G0205500,OS05G0207300,OS02G0699600,OS12G0150100,OS07G0674700,OS01G0231700,OS04G0376000,OS06G0172600,OS04G0598200,OS03G0408300,OS08G0120000,OS11G0629400,OS08G0117300,OS12G0567700,OS01G0686800,OS03G0807800,OS02G0620100,OS02G0284600,OS11G0151300,OS07G0208…
GO:CC	intracellular non-membrane-bounded organelle	GO:0043232	1.2026069310040542e-26		1196	801	94	38866	OS09G0307300,OS06G0244700,OS12G0572000,OS05G0489800,OS09G0568400,OS08G0427700,OS07G0572900,OS03G0341100,OS06G0550000,OS06G0130900,OS08G0130500,OS01G0205500,OS05G0207300,OS02G0699600,OS12G0150100,OS07G0674700,OS01G0231700,OS04G0376000,OS06G0172600,OS04G0598200,OS03G0408300,OS08G0120000,OS11G0629400,OS08G0117300,OS12G0567700,OS01G0686800,OS03G0807800,OS02G0620100,OS02G0284600,OS11G0151300,OS07G0208…
GO:CC	cytosolic small ribosomal subunit	GO:0022627	1.5715139848976694e-23		80	801	27	38866	OS07G0572900,OS06G0172600,OS08G0117300,OS01G0686800,OS03G0807800,OS07G0208000,OS11G0602500,OS02G0804100,OS01G0834500,OS01G0834600,OS03G0798600,OS04G0613600,OS12G0508300,OS10G0170200,OS08G0117200,OS06G0134000,OS05G0552300,OS11G0482000,OS01G0823300,OS03G0577000,OS02G0478700,OS11G0602600,OS04G0346100,OS02G0534800,OS03G0424500,OS03G0424800,OS10G0411700
GO:CC	small ribosomal subunit	GO:0015935	4.134989149721094e-22		89	801	27	38866	OS07G0572900,OS06G0172600,OS08G0117300,OS01G0686800,OS03G0807800,OS07G0208000,OS11G0602500,OS02G0804100,OS01G0834500,OS01G0834600,OS03G0798600,OS04G0613600,OS12G0508300,OS10G0170200,OS08G0117200,OS06G0134000,OS05G0552300,OS11G0482000,OS01G0823300,OS03G0577000,OS02G0478700,OS11G0602600,OS04G0346100,OS02G0534800,OS03G0424500,OS03G0424800,OS10G0411700
GO:CC	intracellular membrane-bounded organelle	GO:0043231	9.365472403035506e-10		7216	801	227	38866	OS01G0952800,OS01G0720500,OS04G0572400,OS02G0677300,OS05G0527800,OS12G0601300,OS08G0474000,OS05G0442700,OS06G0131700,OS12G0561900,OS03G0767000,OS12G0572000,OS04G0525100,OS03G0300900,OS01G0705700,OS09G0522200,OS03G0181500,OS06G0637500,OS05G0489800,OS07G0503500,OS04G0483500,OS05G0413000,OS09G0458700,OS02G0713700,OS01G0143300,OS07G0510400,OS03G0114900,OS01G0926300,OS06G0288300,OS07G0510500,OS03G0389…
GO:CC	membrane-bounded organelle	GO:0043227	3.709509330525051e-9		7317	801	227	38866	OS01G0952800,OS01G0720500,OS04G0572400,OS02G0677300,OS05G0527800,OS12G0601300,OS08G0474000,OS05G0442700,OS06G0131700,OS12G0561900,OS03G0767000,OS12G0572000,OS04G0525100,OS03G0300900,OS01G0705700,OS09G0522200,OS03G0181500,OS06G0637500,OS05G0489800,OS07G0503500,OS04G0483500,OS05G0413000,OS09G0458700,OS02G0713700,OS01G0143300,OS07G0510400,OS03G0114900,OS01G0926300,OS06G0288300,OS07G0510500,OS03G0389…
GO:CC	membrane protein complex	GO:0098796	3.770446707775234e-7		482	801	33	38866	OS01G0720500,OS03G0114900,OS02G0315400,OS08G0120000,OS12G0103300,OS08G0431500,OS01G0612200,OS01G0732000,OS05G0400400,OS07G0495200,OS12G0438900,OS05G0106100,OS05G0481600,OS03G0840900,OS04G0446300,OS01G0935900,OS03G0783700,OS03G0806900,OS03G0711400,OS02G0541700,OS03G0423200,OS03G0186800,OS07G0604500,OS04G0418000,OS08G0112800,OS09G0347500,OS06G0124900,OS03G0187700,OS11G0169900,OS01G0600000,OS03G0112…
GO:CC	mitochondrial part	GO:0044429	5.339116281025127e-7		342	801	27	38866	OS01G0143300,OS03G0114900,OS10G0545800,OS05G0404300,OS08G0120000,OS08G0431500,OS01G0612200,OS01G0732000,OS05G0400400,OS05G0568100,OS07G0495200,OS01G0571200,OS05G0481600,OS03G0840900,OS01G0935900,OS03G0806900,OS02G0541700,OS07G0604500,OS04G0418000,OS08G0112800,OS03G0283600,OS03G0718600,OS11G0707800,OS04G0182800,OS06G0124900,OS01G0600000,OS04G0431100
GO:CC	mitochondrial envelope	GO:0005740	0.0000012648924860232365		243	801	22	38866	OS03G0114900,OS10G0545800,OS05G0404300,OS08G0120000,OS08G0431500,OS01G0612200,OS01G0732000,OS05G0400400,OS07G0495200,OS05G0481600,OS03G0840900,OS01G0935900,OS03G0806900,OS02G0541700,OS07G0604500,OS04G0418000,OS08G0112800,OS03G0283600,OS03G0718600,OS11G0707800,OS06G0124900,OS01G0600000
GO:CC	mitochondrial membrane	GO:0031966	0.0000017380658025076626		226	801	21	38866	OS03G0114900,OS10G0545800,OS08G0120000,OS08G0431500,OS01G0612200,OS01G0732000,OS05G0400400,OS07G0495200,OS05G0481600,OS03G0840900,OS01G0935900,OS03G0806900,OS02G0541700,OS07G0604500,OS04G0418000,OS08G0112800,OS03G0283600,OS03G0718600,OS11G0707800,OS06G0124900,OS01G0600000
GO:CC	mitochondrial inner membrane	GO:0005743	0.000014151332926870196		190	801	18	38866	OS03G0114900,OS10G0545800,OS08G0120000,OS08G0431500,OS01G0612200,OS05G0400400,OS07G0495200,OS05G0481600,OS03G0840900,OS01G0935900,OS03G0806900,OS02G0541700,OS07G0604500,OS04G0418000,OS08G0112800,OS03G0283600,OS06G0124900,OS01G0600000
GO:CC	respiratory chain complex	GO:0098803	0.000023930886970664314		69	801	11	38866	OS08G0120000,OS08G0431500,OS01G0612200,OS05G0400400,OS05G0481600,OS01G0935900,OS03G0806900,OS02G0541700,OS04G0418000,OS08G0112800,OS06G0124900
GO:CC	organelle inner membrane	GO:0019866	0.0000634382015863772		210	801	18	38866	OS03G0114900,OS10G0545800,OS08G0120000,OS08G0431500,OS01G0612200,OS05G0400400,OS07G0495200,OS05G0481600,OS03G0840900,OS01G0935900,OS03G0806900,OS02G0541700,OS07G0604500,OS04G0418000,OS08G0112800,OS03G0283600,OS06G0124900,OS01G0600000
GO:CC	organelle membrane	GO:0031090	0.00007455605114532563		1100	801	49	38866	OS03G0767000,OS03G0114900,OS09G0432900,OS12G0268000,OS10G0545800,OS02G0315400,OS08G0120000,OS12G0103300,OS08G0431500,OS01G0612200,OS01G0732000,OS05G0400400,OS10G0205300,OS07G0495200,OS12G0438900,OS01G0593600,OS05G0106100,OS05G0481600,OS03G0840900,OS04G0446300,OS01G0935900,OS04G0576800,OS03G0806900,OS01G0200500,OS03G0288700,OS03G0711400,OS02G0541700,OS03G0423200,OS04G0670000,OS03G0240700,OS03G0186…
GO:CC	envelope	GO:0031975	0.00011444991593960663		586	801	32	38866	OS01G0720500,OS03G0767000,OS03G0114900,OS10G0545800,OS05G0404300,OS04G0608400,OS08G0120000,OS08G0206600,OS08G0431500,OS01G0612200,OS01G0732000,OS05G0400400,OS07G0495200,OS05G0481600,OS03G0840900,OS01G0935900,OS03G0806900,OS01G0200500,OS02G0541700,OS07G0604500,OS01G0856600,OS04G0418000,OS08G0112800,OS03G0283600,OS03G0718600,OS03G0158200,OS11G0707800,OS12G0548300,OS06G0124900,OS07G0295400,OS01G0600…
GO:CC	organelle envelope	GO:0031967	0.00011444991593960663		586	801	32	38866	OS01G0720500,OS03G0767000,OS03G0114900,OS10G0545800,OS05G0404300,OS04G0608400,OS08G0120000,OS08G0206600,OS08G0431500,OS01G0612200,OS01G0732000,OS05G0400400,OS07G0495200,OS05G0481600,OS03G0840900,OS01G0935900,OS03G0806900,OS01G0200500,OS02G0541700,OS07G0604500,OS01G0856600,OS04G0418000,OS08G0112800,OS03G0283600,OS03G0718600,OS03G0158200,OS11G0707800,OS12G0548300,OS06G0124900,OS07G0295400,OS01G0600…
GO:CC	respirasome	GO:0070469	0.0002337401275182998		86	801	11	38866	OS08G0120000,OS08G0431500,OS01G0612200,OS05G0400400,OS05G0481600,OS01G0935900,OS03G0806900,OS02G0541700,OS04G0418000,OS08G0112800,OS06G0124900
GO:CC	respiratory chain complex II	GO:0045273	0.00037704891525062475		12	801	5	38866	OS08G0120000,OS01G0935900,OS04G0418000,OS08G0112800,OS06G0124900
GO:CC	inner mitochondrial membrane protein complex	GO:0098800	0.0003992214374018981		109	801	12	38866	OS03G0114900,OS08G0431500,OS01G0612200,OS05G0400400,OS07G0495200,OS05G0481600,OS03G0840900,OS03G0806900,OS02G0541700,OS07G0604500,OS08G0112800,OS01G0600000
GO:CC	mitochondrial protein complex	GO:0098798	0.0010833008312300053		162	801	14	38866	OS03G0114900,OS08G0431500,OS01G0612200,OS01G0732000,OS05G0400400,OS07G0495200,OS01G0571200,OS05G0481600,OS03G0840900,OS03G0806900,OS02G0541700,OS07G0604500,OS08G0112800,OS01G0600000
GO:CC	mitochondrial membrane part	GO:0044455	0.0010833008312300053		162	801	14	38866	OS03G0114900,OS08G0431500,OS01G0612200,OS01G0732000,OS05G0400400,OS07G0495200,OS05G0481600,OS03G0840900,OS03G0806900,OS02G0541700,OS07G0604500,OS08G0112800,OS03G0718600,OS01G0600000
GO:CC	membrane part	GO:0044425	0.0016057174443708346		6478	801	180	38866	OS01G0720500,OS04G0460300,OS11G0151400,OS04G0101400,OS01G0872600,OS04G0571600,OS06G0572400,OS09G0500900,OS10G0533500,OS03G0114400,OS01G0882800,OS02G0503900,OS03G0181500,OS01G0197100,OS08G0457300,OS01G0597600,OS11G0189600,OS10G0317900,OS04G0580800,OS05G0430900,OS08G0124500,OS01G0864200,OS06G0129000,OS03G0114900,OS12G0181500,OS07G0582400,OS10G0513900,OS04G0281900,OS03G0417700,OS04G0586500,OS09G0432…
GO:CC	mitochondrion	GO:0005739	0.002350461797567769		906	801	39	38866	OS03G0767000,OS09G0458700,OS01G0143300,OS03G0114900,OS01G0926300,OS10G0545800,OS05G0404300,OS02G0312700,OS08G0120000,OS08G0431500,OS10G0550900,OS01G0612200,OS01G0732000,OS05G0400400,OS02G0102900,OS05G0568100,OS07G0495200,OS09G0459800,OS01G0571200,OS05G0481600,OS03G0840900,OS01G0935900,OS03G0829000,OS03G0806900,OS02G0541700,OS07G0604500,OS04G0418000,OS03G0581600,OS08G0112800,OS03G0283600,OS03G0718…
GO:CC	membrane	GO:0016020	0.007475112117627185		7663	801	203	38866	OS01G0720500,OS04G0460300,OS11G0151400,OS04G0101400,OS01G0872600,OS04G0571600,OS06G0572400,OS09G0500900,OS10G0533500,OS03G0767000,OS03G0114400,OS01G0882800,OS02G0503900,OS03G0181500,OS01G0197100,OS08G0457300,OS01G0597600,OS11G0189600,OS10G0317900,OS04G0580800,OS05G0430900,OS08G0124500,OS02G0182600,OS01G0864200,OS06G0129000,OS03G0114900,OS12G0181500,OS07G0582400,OS10G0513900,OS04G0281900,OS03G0417…
GO:CC	proteasome core complex	GO:0005839	0.01647880472649793		24	801	5	38866	OS11G0615700,OS09G0538200,OS08G0548900,OS09G0505600,OS06G0643100
GO:CC	peptidase complex	GO:1905368	0.019280990242720893		93	801	9	38866	OS11G0615700,OS12G0438900,OS04G0446300,OS09G0538200,OS01G0273000,OS08G0548900,OS09G0505600,OS09G0386400,OS06G0643100
GO:CC	endoplasmic reticulum part	GO:0044432	0.02696930989945445		328	801	18	38866	OS12G0268000,OS06G0163400,OS02G0315400,OS12G0103300,OS12G0438900,OS04G0446300,OS04G0576800,OS02G0710900,OS03G0288700,OS03G0423200,OS04G0670000,OS03G0240700,OS06G0730900,OS03G0129000,OS09G0347500,OS01G0254000,OS11G0707600,OS01G0558600
GO:CC	nuclear pore central transport channel	GO:0044613	0.041945546224778724		7	801	3	38866	OS01G0200500,OS01G0856600,OS07G0295400
KEGG	Ribosome	KEGG:03010	1.5597637280293892e-38	12.1305	204	801	51	38866	OS07G0572900,OS03G0341100,OS08G0130500,OS01G0205500,OS05G0207300,OS02G0699600,OS12G0150100,OS07G0674700,OS01G0231700,OS04G0598200,OS03G0408300,OS08G0117300,OS12G0567700,OS03G0807800,OS02G0284600,OS11G0151300,OS07G0208000,OS01G0328400,OS07G0674200,OS07G0613200,OS03G0756000,OS07G0180900,OS01G0571200,OS04G0473400,OS04G0515300,OS05G0155100,OS03G0796501,OS03G0798600,OS02G0591700,OS01G0752300,OS10G0170…
KEGG	KEGG root term	KEGG:00000	3.341175645197601e-33	2.63565	3369	801	183	38866	OS01G0878900,OS01G0720500,OS12G0601300,OS04G0101400,OS10G0528900,OS10G0109300,OS10G0533500,OS06G0681600,OS03G0767000,OS01G0263300,OS03G0181500,OS01G0197100,OS02G0626100,OS08G0526100,OS11G0189600,OS10G0317900,OS10G0517500,OS04G0483500,OS09G0458700,OS02G0171100,OS01G0926300,OS03G0819600,OS09G0127300,OS03G0389700,OS09G0498500,OS05G0499400,OS03G0597600,OS02G0177600,OS05G0135700,OS05G0413400,OS02G0205…
KEGG	Metabolic pathways	KEGG:01100	2.9069265535335817e-11	2.39876	1598	801	79	38866	OS01G0720500,OS04G0101400,OS10G0528900,OS10G0109300,OS10G0533500,OS06G0681600,OS03G0767000,OS01G0263300,OS03G0181500,OS01G0197100,OS02G0626100,OS08G0526100,OS10G0317900,OS10G0517500,OS04G0483500,OS02G0171100,OS01G0926300,OS03G0819600,OS09G0127300,OS03G0389700,OS09G0498500,OS05G0499400,OS03G0597600,OS02G0177600,OS05G0135700,OS05G0413400,OS02G0205500,OS01G0294700,OS10G0320100,OS01G0371200,OS07G0190…
KEGG	Biosynthesis of secondary metabolites	KEGG:01110	2.8581994767599433e-10	2.95653	837	801	51	38866	OS04G0101400,OS10G0109300,OS10G0533500,OS06G0681600,OS03G0767000,OS01G0263300,OS03G0181500,OS01G0197100,OS02G0626100,OS10G0317900,OS04G0483500,OS02G0171100,OS01G0926300,OS03G0819600,OS09G0127300,OS03G0389700,OS05G0499400,OS03G0597600,OS02G0177600,OS05G0135700,OS05G0413400,OS02G0205500,OS01G0294700,OS10G0320100,OS05G0495700,OS07G0190000,OS05G0549700,OS02G0611800,OS06G0165800,OS08G0120000,OS08G0206…
KEGG	Oxidative phosphorylation	KEGG:00190	0.00000861492527437546	6.61662	88	801	12	38866	OS08G0120000,OS01G0612200,OS05G0400400,OS07G0495200,OS05G0106100,OS05G0481600,OS03G0806900,OS04G0643100,OS03G0718600,OS11G0169900,OS01G0600000,OS01G0610100
KEGG	Phenylpropanoid biosynthesis	KEGG:00940	0.00003000602605420914	4.66556	156	801	15	38866	OS10G0109300,OS06G0681600,OS01G0263300,OS02G0626100,OS09G0127300,OS05G0499400,OS02G0177600,OS01G0294700,OS02G0611800,OS06G0165800,OS02G0697400,OS02G0180700,OS08G0448000,OS09G0419200,OS02G0626400
KEGG	Flavonoid biosynthesis	KEGG:00941	0.00005268132423395981	15.3227	19	801	6	38866	OS04G0101400,OS10G0317900,OS03G0819600,OS10G0320100,OS02G0611800,OS06G0165800
KEGG	Phenylalanine metabolism	KEGG:00360	0.002006604577065814	8.56268	34	801	6	38866	OS02G0626100,OS02G0177600,OS06G0165800,OS02G0697400,OS08G0448000,OS02G0626400
KEGG	Proteasome	KEGG:03050	0.03301141544075948	5.19877	56	801	6	38866	OS11G0615700,OS09G0538200,OS01G0273000,OS08G0548900,OS09G0505600,OS06G0643100

## Sheet: Bv only
source	term_name	term_id	adjusted_p_value	Ratio	term_size	query_size	intersection_size	effective_domain_size	intersections
GO:MF	binding	GO:0005488	0.0000012183969886539202	1.46517	11937	380	171	38866	OS04G0584700,OS05G0125300,OS10G0407400,OS07G0677600,OS03G0320600,OS08G0170200,OS08G0376300,OS01G0902100,OS06G0564400,OS12G0117600,OS04G0420033,OS03G0708000,OS07G0475900,OS03G0235000,OS08G0521200,OS04G0630800,OS03G0685100,OS09G0272900,OS01G0874800,OS04G0310400,OS03G0773300,OS03G0751400,OS02G0241200,OS05G0521300,OS01G0246500,OS01G0699100,OS01G0205200,OS01G0243100,OS04G0632901,OS01G0212400,OS06G0474…
GO:MF	molecular_function	GO:0003674	0.0000013457695900959558	1.32702	17727	380	230	38866	OS04G0584700,OS05G0125300,OS10G0331600,OS11G0655900,OS08G0278750,OS05G0149000,OS10G0407400,OS06G0531600,OS07G0677600,OS03G0320600,OS08G0170200,OS08G0376300,OS01G0902100,OS06G0564400,OS06G0625700,OS11G0505300,OS12G0117600,OS04G0420033,OS03G0708000,OS07G0475900,OS02G0588500,OS03G0235000,OS03G0169500,OS08G0521200,OS04G0630800,OS01G0865400,OS05G0409500,OS01G0623200,OS01G0375500,OS04G0445700,OS03G0685…
GO:MF	heterocyclic compound binding	GO:1901363	0.0008085005159197405	1.549	6801	380	103	38866	OS05G0125300,OS10G0407400,OS07G0677600,OS08G0170200,OS08G0376300,OS01G0902100,OS06G0564400,OS04G0420033,OS07G0475900,OS03G0235000,OS08G0521200,OS03G0685100,OS09G0272900,OS01G0874800,OS03G0773300,OS03G0751400,OS02G0241200,OS05G0521300,OS01G0246500,OS01G0699100,OS01G0243100,OS04G0632901,OS06G0474866,OS03G0101200,OS03G0811400,OS04G0591000,OS04G0665600,OS04G0633200,OS04G0218400,OS03G0388500,OS03G0773…
GO:MF	organic cyclic compound binding	GO:0097159	0.0008478614066209045	1.5474	6808	380	103	38866	OS05G0125300,OS10G0407400,OS07G0677600,OS08G0170200,OS08G0376300,OS01G0902100,OS06G0564400,OS04G0420033,OS07G0475900,OS03G0235000,OS08G0521200,OS03G0685100,OS09G0272900,OS01G0874800,OS03G0773300,OS03G0751400,OS02G0241200,OS05G0521300,OS01G0246500,OS01G0699100,OS01G0243100,OS04G0632901,OS06G0474866,OS03G0101200,OS03G0811400,OS04G0591000,OS04G0665600,OS04G0633200,OS04G0218400,OS03G0388500,OS03G0773…
GO:MF	purine ribonucleotide binding	GO:0032555	0.009445292669445774	1.83025	2850	380	51	38866	OS05G0125300,OS08G0170200,OS08G0376300,OS01G0902100,OS04G0420033,OS07G0475900,OS08G0521200,OS09G0272900,OS03G0773300,OS05G0521300,OS01G0699100,OS01G0243100,OS04G0632901,OS06G0474866,OS03G0101200,OS04G0633200,OS03G0773600,OS02G0714200,OS04G0660500,OS03G0122000,OS01G0870500,OS05G0573300,OS01G0720800,OS01G0629900,OS03G0203700,OS03G0752200,OS04G0437600,OS11G0638000,OS05G0365300,OS01G0958100,OS05G0430…
GO:MF	adenyl ribonucleotide binding	GO:0032559	0.010118138863362018	1.86811	2628	380	48	38866	OS05G0125300,OS08G0170200,OS08G0376300,OS01G0902100,OS04G0420033,OS07G0475900,OS08G0521200,OS09G0272900,OS03G0773300,OS05G0521300,OS01G0699100,OS01G0243100,OS04G0632901,OS06G0474866,OS03G0101200,OS04G0633200,OS03G0773600,OS02G0714200,OS04G0660500,OS03G0122000,OS01G0870500,OS05G0573300,OS01G0720800,OS01G0629900,OS03G0203700,OS03G0752200,OS04G0437600,OS05G0365300,OS09G0332700,OS05G0165900,OS04G0442…
GO:MF	purine nucleotide binding	GO:0017076	0.010166945339858567	1.82513	2858	380	51	38866	OS05G0125300,OS08G0170200,OS08G0376300,OS01G0902100,OS04G0420033,OS07G0475900,OS08G0521200,OS09G0272900,OS03G0773300,OS05G0521300,OS01G0699100,OS01G0243100,OS04G0632901,OS06G0474866,OS03G0101200,OS04G0633200,OS03G0773600,OS02G0714200,OS04G0660500,OS03G0122000,OS01G0870500,OS05G0573300,OS01G0720800,OS01G0629900,OS03G0203700,OS03G0752200,OS04G0437600,OS11G0638000,OS05G0365300,OS01G0958100,OS05G0430…
GO:MF	adenyl nucleotide binding	GO:0030554	0.010818967402844465	1.86315	2635	380	48	38866	OS05G0125300,OS08G0170200,OS08G0376300,OS01G0902100,OS04G0420033,OS07G0475900,OS08G0521200,OS09G0272900,OS03G0773300,OS05G0521300,OS01G0699100,OS01G0243100,OS04G0632901,OS06G0474866,OS03G0101200,OS04G0633200,OS03G0773600,OS02G0714200,OS04G0660500,OS03G0122000,OS01G0870500,OS05G0573300,OS01G0720800,OS01G0629900,OS03G0203700,OS03G0752200,OS04G0437600,OS05G0365300,OS09G0332700,OS05G0165900,OS04G0442…
GO:MF	ribonucleotide binding	GO:0032553	0.012878645006255154	1.80868	2884	380	51	38866	OS05G0125300,OS08G0170200,OS08G0376300,OS01G0902100,OS04G0420033,OS07G0475900,OS08G0521200,OS09G0272900,OS03G0773300,OS05G0521300,OS01G0699100,OS01G0243100,OS04G0632901,OS06G0474866,OS03G0101200,OS04G0633200,OS03G0773600,OS02G0714200,OS04G0660500,OS03G0122000,OS01G0870500,OS05G0573300,OS01G0720800,OS01G0629900,OS03G0203700,OS03G0752200,OS04G0437600,OS11G0638000,OS05G0365300,OS01G0958100,OS05G0430…
GO:MF	purine ribonucleoside triphosphate binding	GO:0035639	0.015253501334081826	1.86774	2519	380	46	38866	OS05G0125300,OS08G0376300,OS01G0902100,OS04G0420033,OS07G0475900,OS08G0521200,OS03G0773300,OS05G0521300,OS01G0699100,OS01G0243100,OS04G0632901,OS06G0474866,OS03G0101200,OS04G0633200,OS03G0773600,OS02G0714200,OS04G0660500,OS03G0122000,OS01G0870500,OS05G0573300,OS01G0629900,OS03G0203700,OS03G0752200,OS04G0437600,OS11G0638000,OS01G0958100,OS05G0430400,OS09G0332700,OS05G0165900,OS04G0442800,OS03G0847…
GO:MF	drug binding	GO:0008144	0.015355183588403883	1.8832	2444	380	45	38866	OS05G0125300,OS08G0376300,OS01G0902100,OS06G0564400,OS04G0420033,OS07G0475900,OS08G0521200,OS03G0773300,OS05G0521300,OS01G0699100,OS01G0243100,OS04G0632901,OS06G0474866,OS03G0101200,OS04G0633200,OS03G0773600,OS02G0714200,OS04G0660500,OS03G0122000,OS01G0870500,OS05G0573300,OS01G0629900,OS03G0203700,OS03G0752200,OS04G0437600,OS09G0332700,OS05G0165900,OS04G0442800,OS03G0847600,OS04G0680700,OS01G0641…
GO:MF	carbohydrate derivative binding	GO:0097367	0.01595848460350472	1.79375	2908	380	51	38866	OS05G0125300,OS08G0170200,OS08G0376300,OS01G0902100,OS04G0420033,OS07G0475900,OS08G0521200,OS09G0272900,OS03G0773300,OS05G0521300,OS01G0699100,OS01G0243100,OS04G0632901,OS06G0474866,OS03G0101200,OS04G0633200,OS03G0773600,OS02G0714200,OS04G0660500,OS03G0122000,OS01G0870500,OS05G0573300,OS01G0720800,OS01G0629900,OS03G0203700,OS03G0752200,OS04G0437600,OS11G0638000,OS05G0365300,OS01G0958100,OS05G0430…
GO:MF	ATP binding	GO:0005524	0.01601776770546481	1.91384	2298	380	43	38866	OS05G0125300,OS08G0376300,OS01G0902100,OS04G0420033,OS07G0475900,OS08G0521200,OS03G0773300,OS05G0521300,OS01G0699100,OS01G0243100,OS04G0632901,OS06G0474866,OS03G0101200,OS04G0633200,OS03G0773600,OS02G0714200,OS04G0660500,OS03G0122000,OS01G0870500,OS05G0573300,OS01G0629900,OS03G0203700,OS03G0752200,OS04G0437600,OS09G0332700,OS05G0165900,OS04G0442800,OS03G0847600,OS04G0680700,OS01G0641000,OS04G0658…
GO:MF	nucleotide binding	GO:0000166	0.018485714320855034	1.7478	3160	380	54	38866	OS05G0125300,OS08G0170200,OS08G0376300,OS01G0902100,OS04G0420033,OS07G0475900,OS08G0521200,OS09G0272900,OS03G0773300,OS05G0521300,OS01G0699100,OS01G0243100,OS04G0632901,OS06G0474866,OS03G0101200,OS04G0633200,OS03G0773600,OS02G0714200,OS04G0660500,OS03G0122000,OS01G0870500,OS05G0573300,OS01G0720800,OS01G0629900,OS03G0203700,OS03G0752200,OS02G0510200,OS04G0437600,OS11G0638000,OS05G0365300,OS01G0958…
GO:MF	nucleoside phosphate binding	GO:1901265	0.018485714320855034	1.7478	3160	380	54	38866	OS05G0125300,OS08G0170200,OS08G0376300,OS01G0902100,OS04G0420033,OS07G0475900,OS08G0521200,OS09G0272900,OS03G0773300,OS05G0521300,OS01G0699100,OS01G0243100,OS04G0632901,OS06G0474866,OS03G0101200,OS04G0633200,OS03G0773600,OS02G0714200,OS04G0660500,OS03G0122000,OS01G0870500,OS05G0573300,OS01G0720800,OS01G0629900,OS03G0203700,OS03G0752200,OS02G0510200,OS04G0437600,OS11G0638000,OS05G0365300,OS01G0958…
GO:MF	small molecule binding	GO:0036094	0.02847484293980418	1.69858	3372	380	56	38866	OS05G0125300,OS08G0170200,OS08G0376300,OS01G0902100,OS06G0564400,OS04G0420033,OS07G0475900,OS08G0521200,OS09G0272900,OS03G0773300,OS05G0521300,OS01G0699100,OS01G0243100,OS04G0632901,OS06G0474866,OS03G0101200,OS04G0633200,OS03G0773600,OS02G0714200,OS04G0660500,OS03G0122000,OS01G0870500,OS05G0573300,OS01G0720800,OS01G0629900,OS03G0203700,OS03G0752200,OS02G0510200,OS04G0437600,OS11G0638000,OS05G0365…
GO:MF	anion binding	GO:0043168	0.04891996322474168	1.67371	3361	380	55	38866	OS05G0125300,OS08G0170200,OS08G0376300,OS01G0902100,OS06G0564400,OS04G0420033,OS07G0475900,OS08G0521200,OS09G0272900,OS03G0773300,OS05G0521300,OS01G0699100,OS01G0243100,OS04G0632901,OS06G0474866,OS03G0101200,OS04G0633200,OS03G0773600,OS02G0714200,OS04G0660500,OS03G0122000,OS01G0870500,OS05G0573300,OS01G0720800,OS01G0629900,OS03G0203700,OS03G0752200,OS02G0510200,OS04G0437600,OS11G0638000,OS05G0365…
GO:BP	biological_process	GO:0008150	0.00035762680486050246	1.32034	15028	380	194	38866	OS04G0584700,OS05G0125300,OS11G0655900,OS08G0278750,OS05G0149000,OS10G0407400,OS07G0677600,OS12G0210500,OS08G0376300,OS01G0902100,OS04G0685500,OS06G0564400,OS06G0625700,OS04G0420033,OS03G0708000,OS07G0475900,OS02G0588500,OS03G0235000,OS03G0169500,OS08G0521200,OS04G0630800,OS05G0409500,OS01G0623200,OS01G0375500,OS04G0445700,OS03G0685100,OS01G0874800,OS04G0310400,OS07G0282500,OS03G0773300,OS03G0751…
GO:BP	cellular process	GO:0009987	0.0035192724909236953	1.36615	11230	380	150	38866	OS04G0584700,OS05G0125300,OS11G0655900,OS08G0278750,OS10G0407400,OS07G0677600,OS08G0376300,OS04G0685500,OS06G0564400,OS06G0625700,OS04G0420033,OS03G0708000,OS07G0475900,OS03G0235000,OS03G0169500,OS08G0521200,OS01G0623200,OS01G0375500,OS04G0445700,OS03G0685100,OS01G0874800,OS04G0310400,OS03G0773300,OS03G0751400,OS03G0100020,OS05G0521300,OS01G0699100,OS01G0205200,OS09G0135700,OS01G0243100,OS04G0632…
GO:BP	cellular metabolic process	GO:0044237	0.011485695883921385	1.39401	9318	380	127	38866	OS04G0584700,OS05G0125300,OS11G0655900,OS08G0278750,OS10G0407400,OS07G0677600,OS08G0376300,OS06G0564400,OS04G0420033,OS03G0708000,OS07G0475900,OS08G0521200,OS01G0375500,OS04G0445700,OS03G0685100,OS01G0874800,OS04G0310400,OS03G0773300,OS03G0751400,OS05G0521300,OS01G0699100,OS01G0205200,OS09G0135700,OS04G0632901,OS06G0474866,OS05G0542600,OS03G0101200,OS03G0811400,OS04G0591000,OS02G0191500,OS04G0633…
GO:BP	nitrogen compound metabolic process	GO:0006807	0.04425252299075368	1.40532	7933	380	109	38866	OS04G0584700,OS05G0125300,OS08G0278750,OS10G0407400,OS08G0376300,OS06G0564400,OS04G0420033,OS07G0475900,OS08G0521200,OS03G0685100,OS01G0874800,OS04G0310400,OS03G0773300,OS03G0751400,OS05G0521300,OS01G0699100,OS01G0205200,OS09G0135700,OS04G0632901,OS05G0542600,OS03G0101200,OS03G0811400,OS04G0591000,OS02G0191500,OS04G0633200,OS06G0683200,OS04G0218400,OS03G0388500,OS05G0403400,OS02G0714200,OS02G0529…
GO:CC	chloroplast	GO:0009507	2.5906039785900105e-11	3.6707	1226	380	44	38866	OS01G0205200,OS06G0683200,OS05G0403400,OS05G0110300,OS11G0119100,OS03G0271500,OS02G0259600,OS08G0515800,OS05G0147500,OS04G0544400,OS10G0512500,OS02G0173100,OS03G0410700,OS10G0330400,OS02G0137200,OS04G0602600,OS06G0115400,OS02G0510200,OS11G0638000,OS05G0430400,OS04G0684500,OS10G0577700,OS01G0924000,OS06G0143000,OS07G0150100,OS10G0517400,OS08G0254500,OS04G0658300,OS02G0702000,OS01G0172100,OS01G0268…
GO:CC	plastid	GO:0009536	5.287623230968148e-11	3.59447	1252	380	44	38866	OS01G0205200,OS06G0683200,OS05G0403400,OS05G0110300,OS11G0119100,OS03G0271500,OS02G0259600,OS08G0515800,OS05G0147500,OS04G0544400,OS10G0512500,OS02G0173100,OS03G0410700,OS10G0330400,OS02G0137200,OS04G0602600,OS06G0115400,OS02G0510200,OS11G0638000,OS05G0430400,OS04G0684500,OS10G0577700,OS01G0924000,OS06G0143000,OS07G0150100,OS10G0517400,OS08G0254500,OS04G0658300,OS02G0702000,OS01G0172100,OS01G0268…
GO:CC	cell	GO:0005623	0.000005977407580047509	1.44961	11289	380	160	38866	OS05G0125300,OS10G0331600,OS11G0655900,OS08G0278750,OS03G0320600,OS08G0376300,OS01G0902100,OS04G0685500,OS06G0564400,OS06G0625700,OS03G0169500,OS01G0865400,OS05G0409500,OS01G0623200,OS03G0685100,OS01G0874800,OS04G0310400,OS03G0773300,OS03G0751400,OS03G0100020,OS02G0241200,OS05G0521300,OS01G0246500,OS01G0205200,OS09G0135700,OS06G0701600,OS04G0632901,OS01G0212400,OS05G0542600,OS01G0723100,OS05G0557…
GO:CC	intracellular membrane-bounded organelle	GO:0043231	0.000007291588250440937	1.61583	7216	380	114	38866	OS10G0331600,OS11G0655900,OS08G0278750,OS03G0320600,OS01G0902100,OS06G0625700,OS03G0169500,OS01G0865400,OS03G0685100,OS02G0241200,OS05G0521300,OS01G0246500,OS01G0205200,OS05G0542600,OS05G0557200,OS04G0591000,OS04G0665600,OS09G0532800,OS06G0683200,OS04G0218400,OS03G0388500,OS05G0403400,OS05G0110300,OS11G0119100,OS03G0271500,OS02G0829800,OS04G0628100,OS02G0259600,OS03G0452300,OS03G0122000,OS06G0702…
GO:CC	membrane-bounded organelle	GO:0043227	0.000008206554038542047	1.6075	7317	380	115	38866	OS10G0331600,OS11G0655900,OS08G0278750,OS03G0320600,OS01G0902100,OS06G0625700,OS03G0169500,OS01G0865400,OS03G0685100,OS02G0241200,OS05G0521300,OS01G0246500,OS01G0205200,OS05G0542600,OS05G0557200,OS04G0591000,OS04G0665600,OS09G0532800,OS06G0683200,OS04G0218400,OS03G0388500,OS05G0403400,OS05G0110300,OS11G0119100,OS03G0271500,OS02G0829800,OS04G0628100,OS02G0259600,OS03G0452300,OS03G0122000,OS06G0702…
GO:CC	cell part	GO:0044464	0.000009127551403195384	1.44674	11170	380	158	38866	OS05G0125300,OS10G0331600,OS11G0655900,OS08G0278750,OS03G0320600,OS08G0376300,OS01G0902100,OS04G0685500,OS06G0564400,OS06G0625700,OS03G0169500,OS01G0865400,OS05G0409500,OS01G0623200,OS03G0685100,OS01G0874800,OS04G0310400,OS03G0773300,OS03G0751400,OS03G0100020,OS02G0241200,OS05G0521300,OS01G0246500,OS01G0205200,OS09G0135700,OS06G0701600,OS04G0632901,OS01G0212400,OS05G0542600,OS01G0723100,OS05G0557…
GO:CC	intracellular organelle	GO:0043229	0.00001355930073362022	1.5703	7816	380	120	38866	OS10G0331600,OS11G0655900,OS08G0278750,OS03G0320600,OS01G0902100,OS06G0625700,OS03G0169500,OS01G0865400,OS03G0685100,OS03G0751400,OS02G0241200,OS05G0521300,OS01G0246500,OS01G0205200,OS05G0542600,OS05G0557200,OS04G0591000,OS04G0665600,OS09G0532800,OS06G0683200,OS04G0218400,OS03G0388500,OS03G0773600,OS05G0403400,OS05G0110300,OS11G0119100,OS03G0271500,OS02G0829800,OS04G0628100,OS02G0259600,OS03G0452…
GO:CC	organelle	GO:0043226	0.000014787808631343393	1.56789	7828	380	120	38866	OS10G0331600,OS11G0655900,OS08G0278750,OS03G0320600,OS01G0902100,OS06G0625700,OS03G0169500,OS01G0865400,OS03G0685100,OS03G0751400,OS02G0241200,OS05G0521300,OS01G0246500,OS01G0205200,OS05G0542600,OS05G0557200,OS04G0591000,OS04G0665600,OS09G0532800,OS06G0683200,OS04G0218400,OS03G0388500,OS03G0773600,OS05G0403400,OS05G0110300,OS11G0119100,OS03G0271500,OS02G0829800,OS04G0628100,OS02G0259600,OS03G0452…
GO:CC	chloroplast part	GO:0044434	0.0001253288551438268	3.42487	657	380	22	38866	OS06G0683200,OS05G0110300,OS11G0119100,OS03G0271500,OS02G0259600,OS05G0147500,OS02G0173100,OS02G0137200,OS06G0115400,OS01G0924000,OS06G0143000,OS07G0150100,OS08G0254500,OS04G0658300,OS01G0172100,OS01G0306800,OS03G0707900,OS09G0515400,OS05G0388500,OS06G0103600,OS06G0237502,OS01G0120300
GO:CC	intracellular	GO:0005622	0.00015651318592628237	1.4569	9337	380	133	38866	OS10G0331600,OS11G0655900,OS08G0278750,OS03G0320600,OS01G0902100,OS04G0685500,OS06G0564400,OS06G0625700,OS03G0169500,OS01G0865400,OS03G0685100,OS01G0874800,OS03G0751400,OS02G0241200,OS05G0521300,OS01G0246500,OS01G0205200,OS09G0135700,OS05G0542600,OS05G0557200,OS04G0591000,OS04G0665600,OS09G0532800,OS06G0683200,OS04G0218400,OS03G0388500,OS03G0773600,OS05G0403400,OS05G0110300,OS11G0119100,OS02G0714…
GO:CC	plastid part	GO:0044435	0.0001647757387409533	3.36847	668	380	22	38866	OS06G0683200,OS05G0110300,OS11G0119100,OS03G0271500,OS02G0259600,OS05G0147500,OS02G0173100,OS02G0137200,OS06G0115400,OS01G0924000,OS06G0143000,OS07G0150100,OS08G0254500,OS04G0658300,OS01G0172100,OS01G0306800,OS03G0707900,OS09G0515400,OS05G0388500,OS06G0103600,OS06G0237502,OS01G0120300
GO:CC	intracellular part	GO:0044424	0.0002492337133432047	1.44812	9323	380	132	38866	OS10G0331600,OS11G0655900,OS08G0278750,OS03G0320600,OS01G0902100,OS04G0685500,OS06G0564400,OS06G0625700,OS03G0169500,OS01G0865400,OS03G0685100,OS01G0874800,OS03G0751400,OS02G0241200,OS05G0521300,OS01G0246500,OS01G0205200,OS09G0135700,OS05G0542600,OS05G0557200,OS04G0591000,OS04G0665600,OS09G0532800,OS06G0683200,OS04G0218400,OS03G0388500,OS03G0773600,OS05G0403400,OS05G0110300,OS11G0119100,OS02G0714…
GO:CC	cytoplasmic part	GO:0044444	0.0002839199810227769	1.68147	4927	380	81	38866	OS01G0902100,OS04G0685500,OS06G0625700,OS03G0169500,OS01G0865400,OS03G0685100,OS03G0751400,OS01G0205200,OS05G0557200,OS09G0532800,OS06G0683200,OS05G0403400,OS05G0110300,OS11G0119100,OS02G0714200,OS03G0271500,OS02G0829800,OS02G0259600,OS03G0452300,OS03G0122000,OS02G0470000,OS08G0515800,OS04G0463300,OS05G0147500,OS08G0107400,OS03G0808100,OS03G0704000,OS04G0196200,OS04G0544400,OS07G0666900,OS01G0764…
GO:CC	cellular_component	GO:0005575	0.00035265386116728204	1.29593	15469	380	196	38866	OS05G0125300,OS10G0331600,OS11G0655900,OS08G0278750,OS05G0149000,OS07G0677600,OS03G0320600,OS11G0264500,OS12G0210500,OS08G0376300,OS01G0902100,OS04G0685500,OS06G0564400,OS06G0625700,OS04G0420033,OS03G0708000,OS03G0169500,OS08G0521200,OS01G0865400,OS05G0409500,OS01G0623200,OS03G0685100,OS07G0595700,OS01G0874800,OS04G0310400,OS08G0452900,OS03G0773300,OS03G0751400,OS03G0100020,OS02G0241200,OS05G0521…
GO:CC	chloroplast envelope	GO:0009941	0.0004412265819970316	5.01746	265	380	13	38866	OS06G0683200,OS11G0119100,OS02G0259600,OS05G0147500,OS02G0173100,OS02G0137200,OS01G0924000,OS07G0150100,OS01G0172100,OS01G0306800,OS03G0707900,OS05G0388500,OS06G0237502
GO:CC	cytoplasm	GO:0005737	0.0004500361282457489	1.58311	6073	380	94	38866	OS11G0655900,OS01G0902100,OS04G0685500,OS06G0564400,OS06G0625700,OS03G0169500,OS01G0865400,OS03G0685100,OS01G0874800,OS03G0751400,OS05G0521300,OS01G0205200,OS09G0135700,OS05G0557200,OS04G0591000,OS09G0532800,OS06G0683200,OS05G0403400,OS05G0110300,OS11G0119100,OS02G0714200,OS03G0271500,OS04G0660500,OS02G0829800,OS04G0628100,OS02G0259600,OS03G0452300,OS03G0122000,OS02G0470000,OS08G0515800,OS04G0463…
GO:CC	plastid envelope	GO:0009526	0.0006110310799509419	4.87043	273	380	13	38866	OS06G0683200,OS11G0119100,OS02G0259600,OS05G0147500,OS02G0173100,OS02G0137200,OS01G0924000,OS07G0150100,OS01G0172100,OS01G0306800,OS03G0707900,OS05G0388500,OS06G0237502
GO:CC	chloroplast stroma	GO:0009570	0.0032294417637481923	4.16811	319	380	13	38866	OS06G0683200,OS05G0110300,OS02G0259600,OS05G0147500,OS02G0173100,OS02G0137200,OS06G0115400,OS01G0924000,OS06G0143000,OS09G0515400,OS05G0388500,OS06G0103600,OS01G0120300
GO:CC	plastid stroma	GO:0009532	0.004050324423783385	4.07861	326	380	13	38866	OS06G0683200,OS05G0110300,OS02G0259600,OS05G0147500,OS02G0173100,OS02G0137200,OS06G0115400,OS01G0924000,OS06G0143000,OS09G0515400,OS05G0388500,OS06G0103600,OS01G0120300
GO:CC	mitochondrion	GO:0005739	0.0063949463160830776	2.59649	906	380	23	38866	OS03G0685100,OS09G0532800,OS06G0683200,OS02G0829800,OS03G0452300,OS02G0470000,OS04G0463300,OS03G0704000,OS04G0544400,OS01G0764300,OS02G0121900,OS02G0226300,OS04G0602600,OS05G0275000,OS05G0430400,OS04G0684500,OS01G0862000,OS01G0268300,OS06G0111300,OS03G0309800,OS06G0103600,OS06G0237502,OS01G0120300
GO:CC	thylakoid	GO:0009579	0.04829479259955028	3.61758	311	380	11	38866	OS05G0110300,OS03G0271500,OS05G0147500,OS01G0924000,OS06G0143000,OS08G0254500,OS04G0658300,OS01G0306800,OS10G0485300,OS05G0388500,OS01G0107900
KEGG	Ribosome	KEGG:03010	0.026254800762081514	4.01094	204	380	8	38866	OS03G0751400,OS06G0683200,OS02G0259600,OS03G0452300,OS03G0704000,OS03G0356300,OS01G0924000,OS05G0388500
