# Supplementary material for: Paraburkholderia phytofirmans PsJN colonization of rice endosphere triggers an atypical transcriptomic response compared to rice native Burkholderia s.l. endophytes
Source: Sci Rep. 2023 Jul 3;13:10696. doi: 10.1038/s41598-023-37314-7 (PMC10317989; doi:10.1038/s41598-023-37314-7)
Supplement: Supplementary file 12 — Supplementary Table S6. [file 41598_2023_37314_MOESM12_ESM.xlsx]

## Sheet: PsJNPkBv
Supplementary Table S6: Gene Ontology (GO) terms and Kyoto Encyclopedia of Genes and Genomes (KEGG) pathway enrichment analysis on the different pool of DEGs shared or not among the response to the three endophytic species (as indicated by the label of each sheet)
source	term_name	term_id	adjusted_p_value	term_size	query_size	intersection_size	effective_domain_size	intersections
GO:MF	small molecule binding	GO:0036094	8.48587375582951e-13	4035	699	232	19516	OS01G0117266,OS04G0122200,OS03G0859700,OS08G0140300,OS09G0482600,OS01G0668200,OS02G0277700,OS10G0124400,OS01G0201200,OS10G0135100,OS08G0158200,OS02G0118875,OS06G0526600,OS08G0500700,OS06G0707700,OS03G0787300,OS02G0697600,OS11G0598300,OS02G0154000,OS10G0572000,OS01G0976100,OS06G0581500,OS02G0590800,OS03G0326100,OS06G0586150,OS02G0227700,OS09G0479500,OS06G0184700,OS06G0102800,OS08G0487800,OS03G0179…
GO:MF	anion binding	GO:0043168	1.0558186632005958e-12	4019	699	231	19516	OS01G0117266,OS04G0122200,OS03G0859700,OS08G0140300,OS09G0482600,OS01G0668200,OS02G0277700,OS10G0124400,OS01G0201200,OS10G0135100,OS08G0158200,OS02G0118875,OS06G0526600,OS08G0500700,OS06G0707700,OS03G0787300,OS02G0697600,OS11G0598300,OS02G0154000,OS10G0572000,OS01G0976100,OS06G0581500,OS02G0590800,OS03G0326100,OS06G0586150,OS02G0227700,OS09G0479500,OS06G0184700,OS06G0102800,OS08G0487800,OS03G0179…
GO:MF	nucleotide binding	GO:0000166	1.7571646309685486e-12	3802	699	221	19516	OS01G0117266,OS04G0122200,OS03G0859700,OS09G0482600,OS01G0668200,OS02G0277700,OS10G0124400,OS01G0201200,OS10G0135100,OS08G0158200,OS02G0118875,OS06G0526600,OS08G0500700,OS06G0707700,OS03G0787300,OS02G0697600,OS11G0598300,OS02G0154000,OS10G0572000,OS01G0976100,OS06G0581500,OS02G0590800,OS03G0326100,OS06G0586150,OS02G0227700,OS09G0479500,OS06G0184700,OS06G0102800,OS08G0487800,OS03G0179000,OS11G0227…
GO:MF	nucleoside phosphate binding	GO:1901265	1.7571646309685486e-12	3802	699	221	19516	OS01G0117266,OS04G0122200,OS03G0859700,OS09G0482600,OS01G0668200,OS02G0277700,OS10G0124400,OS01G0201200,OS10G0135100,OS08G0158200,OS02G0118875,OS06G0526600,OS08G0500700,OS06G0707700,OS03G0787300,OS02G0697600,OS11G0598300,OS02G0154000,OS10G0572000,OS01G0976100,OS06G0581500,OS02G0590800,OS03G0326100,OS06G0586150,OS02G0227700,OS09G0479500,OS06G0184700,OS06G0102800,OS08G0487800,OS03G0179000,OS11G0227…
GO:MF	ribonucleotide binding	GO:0032553	3.1331413978787395e-12	3497	699	207	19516	OS01G0117266,OS04G0122200,OS03G0859700,OS09G0482600,OS01G0668200,OS02G0277700,OS10G0124400,OS01G0201200,OS10G0135100,OS02G0118875,OS06G0526600,OS08G0500700,OS06G0707700,OS03G0787300,OS02G0697600,OS11G0598300,OS02G0154000,OS10G0572000,OS01G0976100,OS06G0581500,OS02G0590800,OS03G0326100,OS06G0586150,OS02G0227700,OS09G0479500,OS06G0184700,OS06G0102800,OS08G0487800,OS03G0179000,OS11G0227200,OS11G0226…
GO:MF	carbohydrate derivative binding	GO:0097367	4.474676538428147e-12	3555	699	209	19516	OS01G0117266,OS04G0122200,OS03G0859700,OS09G0482600,OS01G0668200,OS02G0277700,OS10G0124400,OS01G0201200,OS10G0135100,OS02G0118875,OS06G0526600,OS08G0500700,OS06G0707700,OS03G0787300,OS02G0697600,OS11G0598300,OS02G0154000,OS10G0572000,OS01G0976100,OS06G0581500,OS02G0590800,OS03G0326100,OS06G0586150,OS02G0227700,OS09G0479500,OS06G0184700,OS06G0102800,OS08G0487800,OS03G0179000,OS11G0227200,OS11G0226…
GO:MF	purine nucleotide binding	GO:0017076	4.777119997876441e-12	3465	699	205	19516	OS01G0117266,OS04G0122200,OS03G0859700,OS09G0482600,OS01G0668200,OS02G0277700,OS10G0124400,OS01G0201200,OS10G0135100,OS02G0118875,OS06G0526600,OS08G0500700,OS06G0707700,OS03G0787300,OS02G0697600,OS11G0598300,OS02G0154000,OS10G0572000,OS01G0976100,OS06G0581500,OS02G0590800,OS03G0326100,OS06G0586150,OS02G0227700,OS09G0479500,OS06G0184700,OS06G0102800,OS08G0487800,OS03G0179000,OS11G0227200,OS11G0226…
GO:MF	purine ribonucleotide binding	GO:0032555	7.49000330513028e-12	3457	699	204	19516	OS01G0117266,OS04G0122200,OS03G0859700,OS09G0482600,OS01G0668200,OS02G0277700,OS10G0124400,OS01G0201200,OS10G0135100,OS02G0118875,OS06G0526600,OS08G0500700,OS06G0707700,OS03G0787300,OS02G0697600,OS11G0598300,OS02G0154000,OS10G0572000,OS01G0976100,OS06G0581500,OS02G0590800,OS03G0326100,OS06G0586150,OS02G0227700,OS09G0479500,OS06G0184700,OS06G0102800,OS08G0487800,OS03G0179000,OS11G0227200,OS11G0226…
GO:MF	heterocyclic compound binding	GO:1901363	1.6219779624775367e-11	8521	699	402	19516	OS01G0117266,OS04G0122200,OS03G0859700,OS08G0140300,OS09G0482600,OS01G0668200,OS02G0277700,OS11G0489250,OS10G0124400,OS01G0201200,OS02G0123300,OS09G0470500,OS10G0135100,OS07G0203275,OS07G0628500,OS01G0305900,OS08G0158200,OS02G0118875,OS06G0526600,OS08G0500700,OS06G0707700,OS03G0787300,OS02G0697600,OS11G0598300,OS02G0154000,OS04G0171800,OS02G0244600,OS10G0572000,OS10G0572500,OS01G0976100,OS02G0152…
GO:MF	organic cyclic compound binding	GO:0097159	1.8417976874322283e-11	8527	699	402	19516	OS01G0117266,OS04G0122200,OS03G0859700,OS08G0140300,OS09G0482600,OS01G0668200,OS02G0277700,OS11G0489250,OS10G0124400,OS01G0201200,OS02G0123300,OS09G0470500,OS10G0135100,OS07G0203275,OS07G0628500,OS01G0305900,OS08G0158200,OS02G0118875,OS06G0526600,OS08G0500700,OS06G0707700,OS03G0787300,OS02G0697600,OS11G0598300,OS02G0154000,OS04G0171800,OS02G0244600,OS10G0572000,OS10G0572500,OS01G0976100,OS02G0152…
GO:MF	binding	GO:0005488	2.3805186211162288e-11	13474	699	568	19516	OS11G0691400,OS11G0690332,OS08G0247600,OS01G0117266,OS04G0122200,OS03G0859700,OS03G0293000,OS08G0140300,OS09G0482600,OS01G0668200,OS02G0277700,OS11G0489250,OS10G0124400,OS12G0106000,OS01G0201200,OS10G0422075,OS02G0123300,OS09G0470500,OS10G0135100,OS07G0203275,OS07G0628500,OS01G0305900,OS07G0564750,OS08G0158200,OS02G0118875,OS06G0526600,OS08G0500700,OS06G0707700,OS03G0787300,OS02G0603800,OS04G0367…
GO:MF	adenyl nucleotide binding	GO:0030554	2.2488776485206284e-10	3228	699	189	19516	OS01G0117266,OS04G0122200,OS03G0859700,OS09G0482600,OS01G0668200,OS02G0277700,OS10G0124400,OS01G0201200,OS10G0135100,OS02G0118875,OS06G0526600,OS08G0500700,OS06G0707700,OS03G0787300,OS02G0697600,OS11G0598300,OS02G0154000,OS01G0976100,OS06G0581500,OS02G0590800,OS03G0326100,OS06G0586150,OS02G0227700,OS09G0479500,OS06G0184700,OS06G0102800,OS08G0487800,OS03G0179000,OS11G0227200,OS11G0226201,OS02G0645…
GO:MF	adenyl ribonucleotide binding	GO:0032559	3.561777712219781e-10	3221	699	188	19516	OS01G0117266,OS04G0122200,OS03G0859700,OS09G0482600,OS01G0668200,OS02G0277700,OS10G0124400,OS01G0201200,OS10G0135100,OS02G0118875,OS06G0526600,OS08G0500700,OS06G0707700,OS03G0787300,OS02G0697600,OS11G0598300,OS02G0154000,OS01G0976100,OS06G0581500,OS02G0590800,OS03G0326100,OS06G0586150,OS02G0227700,OS09G0479500,OS06G0184700,OS06G0102800,OS08G0487800,OS03G0179000,OS11G0227200,OS11G0226201,OS02G0645…
GO:MF	ion binding	GO:0043167	7.297394000349598e-9	6823	699	328	19516	OS01G0117266,OS04G0122200,OS03G0859700,OS08G0140300,OS09G0482600,OS01G0668200,OS02G0277700,OS11G0489250,OS10G0124400,OS12G0106000,OS01G0201200,OS10G0135100,OS08G0158200,OS02G0118875,OS06G0526600,OS08G0500700,OS06G0707700,OS03G0787300,OS02G0603800,OS02G0697600,OS11G0598300,OS02G0154000,OS04G0171800,OS08G0191700,OS10G0572000,OS01G0719600,OS10G0572500,OS01G0976100,OS07G0661550,OS06G0581500,OS07G0646…
GO:MF	purine ribonucleoside triphosphate binding	GO:0035639	0.0000022420570833063057	2973	699	163	19516	OS01G0117266,OS04G0122200,OS03G0859700,OS09G0482600,OS01G0668200,OS02G0277700,OS01G0201200,OS06G0526600,OS08G0500700,OS03G0787300,OS02G0697600,OS02G0154000,OS10G0572000,OS01G0976100,OS06G0581500,OS02G0590800,OS03G0326100,OS06G0586150,OS02G0227700,OS06G0184700,OS06G0102800,OS08G0487800,OS03G0179000,OS11G0226201,OS02G0645100,OS01G0364100,OS12G0514500,OS05G0582300,OS05G0537200,OS06G0716700,OS03G0352…
GO:MF	drug binding	GO:0008144	0.000005979323216924229	2944	699	160	19516	OS01G0117266,OS04G0122200,OS03G0859700,OS08G0140300,OS09G0482600,OS01G0668200,OS02G0277700,OS01G0201200,OS06G0526600,OS08G0500700,OS03G0787300,OS02G0697600,OS02G0154000,OS01G0976100,OS06G0581500,OS02G0590800,OS03G0326100,OS06G0586150,OS02G0227700,OS06G0184700,OS06G0102800,OS08G0487800,OS03G0179000,OS11G0226201,OS02G0645100,OS01G0364100,OS12G0514500,OS05G0582300,OS05G0537200,OS06G0716700,OS03G0352…
GO:MF	ADP binding	GO:0043531	0.000041395601754311534	502	699	43	19516	OS10G0124400,OS10G0135100,OS02G0118875,OS06G0707700,OS11G0598300,OS09G0479500,OS11G0227200,OS12G0209901,OS12G0511400,OS08G0202400,OS01G0937300,OS11G0224900,OS02G0272900,OS05G0379500,OS11G0213800,OS12G0273300,OS11G0266500,OS11G0590700,OS11G0485900,OS08G0411900,OS06G0146250,OS01G0359600,OS10G0162832,OS09G0314200,OS01G0520600,OS07G0273900,OS11G0223201,OS05G0274200,OS12G0511500,OS10G0136100,OS08G0296…
GO:MF	ATP binding	GO:0005524	0.00005869371854400129	2738	699	147	19516	OS01G0117266,OS04G0122200,OS03G0859700,OS09G0482600,OS01G0668200,OS02G0277700,OS01G0201200,OS06G0526600,OS08G0500700,OS03G0787300,OS02G0697600,OS02G0154000,OS01G0976100,OS06G0581500,OS02G0590800,OS03G0326100,OS06G0586150,OS02G0227700,OS06G0184700,OS06G0102800,OS08G0487800,OS03G0179000,OS11G0226201,OS02G0645100,OS01G0364100,OS12G0514500,OS05G0582300,OS05G0537200,OS06G0716700,OS03G0352450,OS02G0810…
GO:MF	glucosylceramidase activity	GO:0004348	0.0005333637300395909	4	699	4	19516	OS08G0111200,OS10G0473400,OS11G0242100,OS07G0444000
GO:MF	RNA binding	GO:0003723	0.0010712579802866714	1730	699	98	19516	OS02G0123300,OS07G0203275,OS06G0526600,OS02G0244600,OS06G0499301,OS05G0502800,OS11G0155000,OS04G0432250,OS04G0488500,OS06G0565000,OS02G0631601,OS04G0538166,OS09G0327200,OS05G0275100,OS06G0690900,OS05G0114500,OS03G0650700,OS08G0340900,OS11G0168200,OS04G0592700,OS08G0519600,OS03G0802700,OS05G0147150,OS03G0849800,OS04G0543200,OS04G0510400,OS12G0481100,OS03G0165100,OS03G0172000,OS12G0233200,OS10G0167…
GO:MF	nucleoside-triphosphatase activity	GO:0017111	0.00818701819559179	904	699	57	19516	OS06G0526600,OS10G0572000,OS01G0976100,OS03G0326100,OS06G0184700,OS02G0645100,OS05G0537200,OS06G0716700,OS03G0352450,OS04G0432250,OS06G0700700,OS04G0538166,OS03G0686300,OS10G0412050,OS03G0650700,OS01G0805900,OS04G0556000,OS05G0100600,OS03G0802700,OS01G0713900,OS04G0510400,OS12G0481100,OS01G0375000,OS02G0211000,OS02G0176700,OS03G0333100,OS06G0589300,OS01G0646800,OS12G0631100,OS03G0583900,OS05G0274…
GO:MF	hydrolase activity, acting on acid anhydrides	GO:0016817	0.03214510016091197	972	699	58	19516	OS06G0526600,OS10G0572000,OS01G0976100,OS03G0326100,OS06G0184700,OS02G0645100,OS05G0537200,OS06G0716700,OS03G0352450,OS04G0432250,OS06G0700700,OS04G0538166,OS03G0686300,OS10G0412050,OS03G0650700,OS01G0805900,OS04G0556000,OS05G0100600,OS03G0802700,OS01G0713900,OS04G0510400,OS12G0481100,OS01G0375000,OS02G0211000,OS02G0176700,OS03G0333100,OS06G0589300,OS01G0646800,OS12G0631100,OS03G0583900,OS05G0274…
GO:MF	pyrophosphatase activity	GO:0016462	0.033749852293627404	952	699	57	19516	OS06G0526600,OS10G0572000,OS01G0976100,OS03G0326100,OS06G0184700,OS02G0645100,OS05G0537200,OS06G0716700,OS03G0352450,OS04G0432250,OS06G0700700,OS04G0538166,OS03G0686300,OS10G0412050,OS03G0650700,OS01G0805900,OS04G0556000,OS05G0100600,OS03G0802700,OS01G0713900,OS04G0510400,OS12G0481100,OS01G0375000,OS02G0211000,OS02G0176700,OS03G0333100,OS06G0589300,OS01G0646800,OS12G0631100,OS03G0583900,OS05G0274…
GO:BP	cellular process	GO:0009987	0.001130420748085594	13914	666	561	18096	OS01G0117266,OS04G0122200,OS03G0859700,OS08G0230800,OS04G0625350,OS03G0293000,OS08G0140300,OS09G0482600,OS02G0277700,OS12G0106000,OS01G0201200,OS02G0123300,OS09G0470500,OS10G0135100,OS07G0203275,OS07G0628500,OS01G0305900,OS07G0564750,OS02G0118875,OS06G0526600,OS09G0428300,OS08G0500700,OS04G0402500,OS03G0787300,OS02G0603800,OS11G0137300,OS01G0943800,OS02G0697600,OS11G0598300,OS02G0154000,OS08G0191…
GO:BP	glycosphingolipid catabolic process	GO:0046479	0.0017158735227191242	4	666	4	18096	OS08G0111200,OS10G0473400,OS11G0242100,OS07G0444000
GO:BP	glycolipid catabolic process	GO:0019377	0.0017158735227191242	4	666	4	18096	OS08G0111200,OS10G0473400,OS11G0242100,OS07G0444000
GO:BP	glucosylceramide catabolic process	GO:0006680	0.0017158735227191242	4	666	4	18096	OS08G0111200,OS10G0473400,OS11G0242100,OS07G0444000
GO:BP	glycosylceramide catabolic process	GO:0046477	0.0017158735227191242	4	666	4	18096	OS08G0111200,OS10G0473400,OS11G0242100,OS07G0444000
GO:BP	ceramide catabolic process	GO:0046514	0.008328227159905574	5	666	4	18096	OS08G0111200,OS10G0473400,OS11G0242100,OS07G0444000
GO:BP	glycosylceramide metabolic process	GO:0006677	0.008328227159905574	5	666	4	18096	OS08G0111200,OS10G0473400,OS11G0242100,OS07G0444000
GO:BP	glucosylceramide metabolic process	GO:0006678	0.008328227159905574	5	666	4	18096	OS08G0111200,OS10G0473400,OS11G0242100,OS07G0444000
GO:BP	glycosphingolipid metabolic process	GO:0006687	0.008328227159905574	5	666	4	18096	OS08G0111200,OS10G0473400,OS11G0242100,OS07G0444000
GO:BP	sphingolipid catabolic process	GO:0030149	0.024254200232500044	6	666	4	18096	OS08G0111200,OS10G0473400,OS11G0242100,OS07G0444000
GO:BP	membrane lipid catabolic process	GO:0046466	0.024254200232500044	6	666	4	18096	OS08G0111200,OS10G0473400,OS11G0242100,OS07G0444000
GO:BP	endocytosis	GO:0006897	0.02990500625068766	45	666	9	18096	OS03G0112101,OS02G0810400,OS01G0634300,OS02G0793100,OS01G0772600,OS05G0579900,OS10G0575200,OS05G0200500,OS02G0622100
GO:CC	cell	GO:0005623	0.007822638465062245	13830	676	551	18385	OS04G0122200,OS03G0859700,OS08G0230800,OS04G0625350,OS03G0293000,OS09G0482600,OS02G0277700,OS12G0106000,OS01G0201200,OS10G0422075,OS06G0210000,OS02G0123300,OS09G0470500,OS10G0135100,OS07G0203275,OS07G0628500,OS01G0305900,OS02G0118875,OS03G0803800,OS06G0526600,OS09G0428300,OS08G0500700,OS03G0787300,OS02G0603800,OS02G0697600,OS11G0598300,OS07G0421866,OS01G0952500,OS02G0202300,OS06G0301300,OS10G0572…
GO:CC	cell part	GO:0044464	0.008811220572421001	13779	676	549	18385	OS04G0122200,OS03G0859700,OS08G0230800,OS04G0625350,OS03G0293000,OS09G0482600,OS02G0277700,OS12G0106000,OS01G0201200,OS10G0422075,OS06G0210000,OS02G0123300,OS09G0470500,OS10G0135100,OS07G0203275,OS07G0628500,OS01G0305900,OS02G0118875,OS03G0803800,OS06G0526600,OS09G0428300,OS08G0500700,OS03G0787300,OS02G0603800,OS02G0697600,OS11G0598300,OS07G0421866,OS01G0952500,OS02G0202300,OS06G0301300,OS10G0572…
GO:CC	nuclear lumen	GO:0031981	0.02949956536537103	860	676	53	18385	OS04G0625350,OS07G0203275,OS06G0526600,OS07G0648266,OS05G0100500,OS05G0447580,OS03G0352450,OS08G0332800,OS02G0135700,OS06G0645901,OS03G0639200,OS03G0151300,OS04G0592700,OS03G0802700,OS04G0510400,OS12G0481100,OS01G0375000,OS10G0495500,OS01G0104800,OS06G0731600,OS10G0495600,OS01G0147700,OS01G0655400,OS03G0203100,OS03G0598200,OS03G0800800,OS01G0775100,OS05G0274200,OS03G0151700,OS03G0343300,OS08G0159…
GO:CC	nucleolus	GO:0005730	0.037445254369745974	328	676	26	18385	OS04G0625350,OS07G0203275,OS06G0526600,OS02G0135700,OS04G0592700,OS03G0802700,OS04G0510400,OS12G0481100,OS01G0375000,OS10G0495500,OS01G0104800,OS10G0495600,OS01G0147700,OS03G0203100,OS03G0598200,OS03G0151700,OS03G0343300,OS08G0159900,OS06G0644600,OS12G0166500,OS04G0641000,OS01G0256800,OS02G0736600,OS10G0390100,OS04G0446500,OS01G0633200
KEGG	Aminoacyl-tRNA biosynthesis	KEGG:00970	0.01983973002191672	35	146	7	3410	OS09G0378300,OS09G0503400,OS03G0586800,OS05G0182800,OS03G0694900,OS10G0369000,OS12G0443700

## Sheet: PkPsJN
source	term_name	term_id	adjusted_p_value	term_size	query_size	intersection_size	effective_domain_size	intersections
GO:MF	adenyl ribonucleotide binding	GO:0032559	0.0002435889021342257	3221	329	89	19516	OS07G0131500,OS01G0206700,OS11G0494100,OS08G0556500,OS01G0668600,OS04G0220300,OS06G0557700,OS04G0492500,OS12G0433500,OS04G0503200,OS04G0512900,OS01G0574400,OS07G0642400,OS11G0586001,OS04G0433800,OS08G0450700,OS06G0165500,OS04G0661200,OS02G0262800,OS09G0313500,OS12G0291000,OS12G0553200,OS01G0116900,OS01G0674100,OS08G0295300,OS02G0201900,OS09G0121050,OS03G0722400,OS11G0176200,OS11G0429100,OS11G0191…
GO:MF	adenyl nucleotide binding	GO:0030554	0.0002677938697968097	3228	329	89	19516	OS07G0131500,OS01G0206700,OS11G0494100,OS08G0556500,OS01G0668600,OS04G0220300,OS06G0557700,OS04G0492500,OS12G0433500,OS04G0503200,OS04G0512900,OS01G0574400,OS07G0642400,OS11G0586001,OS04G0433800,OS08G0450700,OS06G0165500,OS04G0661200,OS02G0262800,OS09G0313500,OS12G0291000,OS12G0553200,OS01G0116900,OS01G0674100,OS08G0295300,OS02G0201900,OS09G0121050,OS03G0722400,OS11G0176200,OS11G0429100,OS11G0191…
GO:MF	binding	GO:0005488	0.00046102940960260304	13474	329	265	19516	OS08G0560000,OS10G0464000,OS07G0131500,OS01G0176300,OS01G0206700,OS10G0558600,OS05G0445900,OS11G0494100,OS08G0556500,OS09G0544400,OS01G0668600,OS08G0461600,OS07G0260000,OS04G0220300,OS06G0557700,OS02G0132100,OS11G0680200,OS04G0492500,OS03G0700700,OS02G0530100,OS03G0165300,OS02G0821800,OS07G0409400,OS12G0433500,OS07G0530100,OS01G0826000,OS03G0781100,OS10G0477200,OS04G0503200,OS04G0512900,OS03G0363…
GO:MF	purine ribonucleotide binding	GO:0032555	0.0007685156774821889	3457	329	92	19516	OS07G0131500,OS01G0206700,OS11G0494100,OS08G0556500,OS01G0668600,OS04G0220300,OS06G0557700,OS04G0492500,OS12G0433500,OS04G0503200,OS04G0512900,OS01G0574400,OS07G0642400,OS11G0586001,OS04G0433800,OS08G0450700,OS06G0165500,OS04G0661200,OS02G0262800,OS09G0313500,OS12G0291000,OS12G0553200,OS01G0116900,OS01G0674100,OS08G0295300,OS02G0201900,OS09G0121050,OS03G0722400,OS11G0176200,OS11G0429100,OS11G0191…
GO:MF	purine nucleotide binding	GO:0017076	0.0008491055904319534	3465	329	92	19516	OS07G0131500,OS01G0206700,OS11G0494100,OS08G0556500,OS01G0668600,OS04G0220300,OS06G0557700,OS04G0492500,OS12G0433500,OS04G0503200,OS04G0512900,OS01G0574400,OS07G0642400,OS11G0586001,OS04G0433800,OS08G0450700,OS06G0165500,OS04G0661200,OS02G0262800,OS09G0313500,OS12G0291000,OS12G0553200,OS01G0116900,OS01G0674100,OS08G0295300,OS02G0201900,OS09G0121050,OS03G0722400,OS11G0176200,OS11G0429100,OS11G0191…
GO:MF	ribonucleotide binding	GO:0032553	0.0012583876220432163	3497	329	92	19516	OS07G0131500,OS01G0206700,OS11G0494100,OS08G0556500,OS01G0668600,OS04G0220300,OS06G0557700,OS04G0492500,OS12G0433500,OS04G0503200,OS04G0512900,OS01G0574400,OS07G0642400,OS11G0586001,OS04G0433800,OS08G0450700,OS06G0165500,OS04G0661200,OS02G0262800,OS09G0313500,OS12G0291000,OS12G0553200,OS01G0116900,OS01G0674100,OS08G0295300,OS02G0201900,OS09G0121050,OS03G0722400,OS11G0176200,OS11G0429100,OS11G0191…
GO:MF	nucleoside phosphate binding	GO:1901265	0.0013022780054107385	3802	329	98	19516	OS07G0131500,OS01G0206700,OS11G0494100,OS08G0556500,OS01G0668600,OS04G0220300,OS06G0557700,OS04G0492500,OS12G0433500,OS04G0503200,OS04G0512900,OS01G0574400,OS07G0642400,OS11G0586001,OS04G0433800,OS08G0450700,OS06G0165500,OS04G0661200,OS02G0262800,OS09G0313500,OS12G0291000,OS12G0553200,OS01G0116900,OS01G0674100,OS08G0295300,OS02G0201900,OS09G0121050,OS03G0722400,OS11G0176200,OS11G0429100,OS11G0191…
GO:MF	nucleotide binding	GO:0000166	0.0013022780054107385	3802	329	98	19516	OS07G0131500,OS01G0206700,OS11G0494100,OS08G0556500,OS01G0668600,OS04G0220300,OS06G0557700,OS04G0492500,OS12G0433500,OS04G0503200,OS04G0512900,OS01G0574400,OS07G0642400,OS11G0586001,OS04G0433800,OS08G0450700,OS06G0165500,OS04G0661200,OS02G0262800,OS09G0313500,OS12G0291000,OS12G0553200,OS01G0116900,OS01G0674100,OS08G0295300,OS02G0201900,OS09G0121050,OS03G0722400,OS11G0176200,OS11G0429100,OS11G0191…
GO:MF	ATP binding	GO:0005524	0.0017660522079996665	2738	329	76	19516	OS07G0131500,OS01G0206700,OS08G0556500,OS01G0668600,OS04G0220300,OS06G0557700,OS04G0492500,OS12G0433500,OS04G0503200,OS01G0574400,OS07G0642400,OS11G0586001,OS04G0433800,OS08G0450700,OS06G0165500,OS04G0661200,OS12G0291000,OS01G0116900,OS01G0674100,OS08G0295300,OS02G0201900,OS09G0121050,OS03G0722400,OS11G0176200,OS11G0191400,OS01G0327600,OS09G0114500,OS11G0195100,OS04G0509300,OS10G0430900,OS03G0748…
GO:MF	carbohydrate derivative binding	GO:0097367	0.002511505003969736	3555	329	92	19516	OS07G0131500,OS01G0206700,OS11G0494100,OS08G0556500,OS01G0668600,OS04G0220300,OS06G0557700,OS04G0492500,OS12G0433500,OS04G0503200,OS04G0512900,OS01G0574400,OS07G0642400,OS11G0586001,OS04G0433800,OS08G0450700,OS06G0165500,OS04G0661200,OS02G0262800,OS09G0313500,OS12G0291000,OS12G0553200,OS01G0116900,OS01G0674100,OS08G0295300,OS02G0201900,OS09G0121050,OS03G0722400,OS11G0176200,OS11G0429100,OS11G0191…
GO:MF	ion binding	GO:0043167	0.002796778929835331	6823	329	153	19516	OS08G0560000,OS07G0131500,OS01G0176300,OS01G0206700,OS10G0558600,OS05G0445900,OS11G0494100,OS08G0556500,OS09G0544400,OS01G0668600,OS08G0461600,OS04G0220300,OS06G0557700,OS11G0680200,OS04G0492500,OS03G0700700,OS02G0530100,OS12G0433500,OS01G0826000,OS10G0477200,OS04G0503200,OS04G0512900,OS01G0574400,OS07G0642400,OS11G0586001,OS04G0433800,OS07G0248900,OS08G0450700,OS06G0165500,OS01G0737900,OS04G0661…
GO:MF	heterocyclic compound binding	GO:1901363	0.0037958671186604353	8521	329	182	19516	OS07G0131500,OS01G0176300,OS01G0206700,OS10G0558600,OS05G0445900,OS11G0494100,OS08G0556500,OS01G0668600,OS08G0461600,OS07G0260000,OS04G0220300,OS06G0557700,OS02G0132100,OS04G0492500,OS03G0165300,OS02G0821800,OS07G0409400,OS12G0433500,OS07G0530100,OS03G0781100,OS10G0477200,OS04G0503200,OS04G0512900,OS03G0363700,OS01G0574400,OS07G0642400,OS11G0586001,OS04G0433800,OS09G0413300,OS01G0765200,OS07G0248…
GO:MF	organic cyclic compound binding	GO:0097159	0.003992847924195798	8527	329	182	19516	OS07G0131500,OS01G0176300,OS01G0206700,OS10G0558600,OS05G0445900,OS11G0494100,OS08G0556500,OS01G0668600,OS08G0461600,OS07G0260000,OS04G0220300,OS06G0557700,OS02G0132100,OS04G0492500,OS03G0165300,OS02G0821800,OS07G0409400,OS12G0433500,OS07G0530100,OS03G0781100,OS10G0477200,OS04G0503200,OS04G0512900,OS03G0363700,OS01G0574400,OS07G0642400,OS11G0586001,OS04G0433800,OS09G0413300,OS01G0765200,OS07G0248…
GO:MF	purine ribonucleoside triphosphate binding	GO:0035639	0.005494182351552943	2973	329	79	19516	OS07G0131500,OS01G0206700,OS08G0556500,OS01G0668600,OS04G0220300,OS06G0557700,OS04G0492500,OS12G0433500,OS04G0503200,OS01G0574400,OS07G0642400,OS11G0586001,OS04G0433800,OS08G0450700,OS06G0165500,OS04G0661200,OS12G0291000,OS01G0116900,OS01G0674100,OS08G0295300,OS02G0201900,OS09G0121050,OS03G0722400,OS11G0176200,OS11G0191400,OS03G0219300,OS01G0327600,OS09G0114500,OS11G0195100,OS04G0509300,OS10G0430…
GO:MF	ATPase activity, coupled	GO:0042623	0.005963785241017241	508	329	23	19516	OS08G0556500,OS01G0574400,OS04G0433800,OS02G0201900,OS11G0176200,OS09G0114500,OS11G0195100,OS03G0748800,OS07G0508000,OS03G0262300,OS04G0620000,OS05G0107600,OS03G0805200,OS05G0495600,OS07G0495900,OS05G0148000,OS04G0507000,OS01G0767700,OS02G0172600,OS08G0517200,OS05G0196100,OS03G0281600,OS07G0549700
GO:MF	drug binding	GO:0008144	0.007024892400589754	2944	329	78	19516	OS07G0131500,OS01G0206700,OS08G0556500,OS01G0668600,OS04G0220300,OS06G0557700,OS04G0492500,OS12G0433500,OS04G0503200,OS01G0574400,OS07G0642400,OS11G0586001,OS04G0433800,OS08G0450700,OS06G0165500,OS04G0661200,OS12G0291000,OS01G0116900,OS01G0674100,OS08G0295300,OS02G0201900,OS09G0121050,OS03G0722400,OS11G0176200,OS11G0191400,OS01G0327600,OS09G0114500,OS11G0195100,OS04G0509300,OS10G0430900,OS03G0748…
GO:MF	anion binding	GO:0043168	0.008121753850747331	4019	329	99	19516	OS07G0131500,OS01G0206700,OS11G0494100,OS08G0556500,OS09G0544400,OS01G0668600,OS04G0220300,OS06G0557700,OS04G0492500,OS12G0433500,OS04G0503200,OS04G0512900,OS01G0574400,OS07G0642400,OS11G0586001,OS04G0433800,OS08G0450700,OS06G0165500,OS04G0661200,OS02G0262800,OS09G0313500,OS12G0291000,OS12G0553200,OS01G0116900,OS01G0674100,OS08G0295300,OS02G0201900,OS09G0121050,OS03G0722400,OS11G0176200,OS11G0429…
GO:MF	small molecule binding	GO:0036094	0.009585079411557212	4035	329	99	19516	OS07G0131500,OS01G0206700,OS11G0494100,OS08G0556500,OS01G0668600,OS04G0220300,OS06G0557700,OS04G0492500,OS12G0433500,OS04G0503200,OS04G0512900,OS01G0574400,OS07G0642400,OS11G0586001,OS04G0433800,OS08G0450700,OS06G0165500,OS04G0661200,OS02G0262800,OS09G0313500,OS12G0291000,OS12G0553200,OS01G0116900,OS01G0674100,OS08G0295300,OS02G0201900,OS09G0121050,OS03G0722400,OS11G0176200,OS11G0429100,OS11G0191…
GO:MF	ATPase activity	GO:0016887	0.026029912501781487	597	329	24	19516	OS08G0556500,OS01G0574400,OS04G0433800,OS02G0201900,OS11G0176200,OS09G0114500,OS11G0195100,OS03G0748800,OS07G0508000,OS03G0262300,OS04G0620000,OS05G0107600,OS03G0805200,OS05G0495600,OS07G0495900,OS05G0154700,OS05G0148000,OS04G0507000,OS01G0767700,OS02G0172600,OS08G0517200,OS05G0196100,OS03G0281600,OS07G0549700
GO:BP	nucleic acid metabolic process	GO:0090304	0.00017087952629268055	4322	304	112	18096	OS01G0176300,OS10G0558600,OS05G0445900,OS08G0461600,OS07G0260000,OS02G0132100,OS11G0680200,OS03G0165300,OS02G0821800,OS05G0588200,OS07G0409400,OS07G0530100,OS03G0781100,OS10G0477200,OS03G0363700,OS04G0433800,OS09G0413300,OS07G0248900,OS01G0737900,OS03G0307800,OS06G0264300,OS01G0737300,OS07G0109600,OS02G0316900,OS03G0181600,OS12G0291000,OS07G0563600,OS02G0147300,OS09G0359800,OS08G0295300,OS02G0201…
GO:BP	macromolecule metabolic process	GO:0043170	0.00040789730067539615	9396	304	200	18096	OS07G0131500,OS01G0176300,OS01G0206700,OS06G0113150,OS10G0558600,OS05G0445900,OS01G0668600,OS08G0461600,OS07G0260000,OS04G0220300,OS06G0557700,OS02G0132100,OS11G0680200,OS04G0492500,OS03G0165300,OS02G0821800,OS05G0588200,OS07G0409400,OS12G0433500,OS07G0530100,OS12G0273900,OS03G0781100,OS10G0477200,OS04G0503200,OS03G0363700,OS01G0574400,OS11G0586001,OS04G0433800,OS12G0596000,OS09G0413300,OS07G0248…
GO:BP	nucleobase-containing compound metabolic process	GO:0006139	0.00047246865578482697	4720	304	118	18096	OS01G0176300,OS10G0558600,OS05G0445900,OS08G0461600,OS07G0260000,OS02G0132100,OS11G0680200,OS03G0165300,OS02G0821800,OS05G0588200,OS07G0409400,OS07G0530100,OS03G0781100,OS10G0477200,OS03G0363700,OS04G0433800,OS09G0413300,OS07G0248900,OS01G0737900,OS03G0307800,OS06G0264300,OS01G0737300,OS07G0109600,OS02G0316900,OS03G0181600,OS12G0291000,OS07G0563600,OS02G0147300,OS09G0359800,OS08G0295300,OS02G0201…
GO:BP	nitrogen compound metabolic process	GO:0006807	0.0012929537746747656	9952	304	207	18096	OS07G0131500,OS01G0176300,OS01G0206700,OS10G0558600,OS05G0445900,OS09G0544400,OS01G0668600,OS08G0461600,OS07G0260000,OS04G0220300,OS06G0557700,OS02G0132100,OS11G0680200,OS04G0492500,OS03G0165300,OS02G0821800,OS05G0588200,OS07G0409400,OS12G0433500,OS07G0530100,OS12G0273900,OS03G0781100,OS10G0477200,OS04G0503200,OS03G0363700,OS03G0431200,OS01G0574400,OS11G0586001,OS04G0433800,OS12G0596000,OS09G0413…
GO:BP	heterocycle metabolic process	GO:0046483	0.0035976696074751435	4957	304	119	18096	OS01G0176300,OS10G0558600,OS05G0445900,OS08G0461600,OS07G0260000,OS02G0132100,OS11G0680200,OS03G0165300,OS02G0821800,OS05G0588200,OS07G0409400,OS07G0530100,OS03G0781100,OS10G0477200,OS03G0363700,OS04G0433800,OS09G0413300,OS07G0248900,OS01G0737900,OS03G0307800,OS06G0264300,OS01G0737300,OS07G0109600,OS02G0316900,OS03G0181600,OS12G0291000,OS07G0563600,OS02G0147300,OS09G0359800,OS08G0295300,OS02G0201…
GO:BP	cellular aromatic compound metabolic process	GO:0006725	0.007160206723095957	5078	304	120	18096	OS01G0176300,OS10G0558600,OS05G0445900,OS08G0461600,OS07G0260000,OS02G0132100,OS11G0680200,OS03G0165300,OS02G0821800,OS05G0588200,OS07G0409400,OS07G0530100,OS03G0781100,OS10G0477200,OS03G0363700,OS04G0433800,OS09G0413300,OS07G0248900,OS01G0737900,OS03G0307800,OS06G0264300,OS01G0737300,OS07G0109600,OS02G0316900,OS03G0181600,OS12G0291000,OS07G0563600,OS02G0147300,OS09G0359800,OS08G0295300,OS02G0201…
GO:BP	DNA metabolic process	GO:0006259	0.00961922883437588	645	304	27	18096	OS05G0445900,OS08G0461600,OS05G0588200,OS07G0530100,OS04G0433800,OS07G0248900,OS06G0264300,OS01G0737300,OS12G0291000,OS12G0293100,OS09G0121050,OS05G0102200,OS03G0858100,OS06G0305200,OS08G0175600,OS07G0608500,OS04G0509300,OS02G0496500,OS03G0262300,OS03G0205400,OS05G0235300,OS01G0106700,OS01G0218032,OS08G0154600,OS04G0507000,OS05G0596600,OS06G0218500
GO:BP	organic cyclic compound metabolic process	GO:1901360	0.015857869151200556	5159	304	120	18096	OS01G0176300,OS10G0558600,OS05G0445900,OS08G0461600,OS07G0260000,OS02G0132100,OS11G0680200,OS03G0165300,OS02G0821800,OS05G0588200,OS07G0409400,OS07G0530100,OS03G0781100,OS10G0477200,OS03G0363700,OS04G0433800,OS09G0413300,OS07G0248900,OS01G0737900,OS03G0307800,OS06G0264300,OS01G0737300,OS07G0109600,OS02G0316900,OS03G0181600,OS12G0291000,OS07G0563600,OS02G0147300,OS09G0359800,OS08G0295300,OS02G0201…
GO:BP	histone modification	GO:0016570	0.018486891221693152	194	304	13	18096	OS02G0821800,OS03G0307800,OS07G0109600,OS09G0359800,OS12G0182700,OS02G0100200,OS01G0246100,OS05G0302300,OS01G0147200,OS07G0476200,OS11G0545600,OS04G0414100,OS10G0565600
GO:BP	covalent chromatin modification	GO:0016569	0.021717875980283335	197	304	13	18096	OS02G0821800,OS03G0307800,OS07G0109600,OS09G0359800,OS12G0182700,OS02G0100200,OS01G0246100,OS05G0302300,OS01G0147200,OS07G0476200,OS11G0545600,OS04G0414100,OS10G0565600
GO:BP	cellular process	GO:0009987	0.02187260084508847	13914	304	262	18096	OS07G0131500,OS01G0176300,OS01G0206700,OS06G0113150,OS10G0558600,OS05G0445900,OS08G0556500,OS09G0544400,OS01G0668600,OS08G0461600,OS07G0260000,OS04G0220300,OS06G0557700,OS02G0132100,OS12G0117400,OS11G0680200,OS04G0492500,OS03G0700700,OS02G0530100,OS03G0165300,OS02G0821800,OS05G0588200,OS07G0409400,OS12G0433500,OS07G0530100,OS01G0826000,OS12G0273900,OS03G0781100,OS10G0477200,OS04G0503200,OS04G0512…
GO:BP	cellular nitrogen compound metabolic process	GO:0034641	0.029752768396054768	5666	304	128	18096	OS01G0176300,OS10G0558600,OS05G0445900,OS09G0544400,OS08G0461600,OS07G0260000,OS02G0132100,OS11G0680200,OS04G0492500,OS03G0165300,OS02G0821800,OS05G0588200,OS07G0409400,OS07G0530100,OS03G0781100,OS10G0477200,OS03G0363700,OS04G0433800,OS09G0413300,OS07G0248900,OS01G0737900,OS03G0307800,OS06G0264300,OS01G0737300,OS07G0109600,OS03G0796400,OS02G0316900,OS03G0181600,OS12G0291000,OS07G0563600,OS02G0147…
GO:BP	protein deubiquitination	GO:0016579	0.032283096860615236	77	304	8	18096	OS03G0192800,OS09G0505100,OS01G0177200,OS11G0573000,OS12G0172500,OS04G0414100,OS10G0182000,OS12G0165000
GO:BP	organelle organization	GO:0006996	0.04065794216480426	1554	304	47	18096	OS08G0556500,OS02G0821800,OS05G0588200,OS07G0409400,OS12G0433500,OS04G0433800,OS03G0307800,OS07G0109600,OS09G0359800,OS12G0293100,OS09G0121050,OS12G0182700,OS06G0305200,OS03G0219300,OS04G0382700,OS02G0100200,OS02G0456000,OS11G0195100,OS02G0523300,OS08G0544500,OS07G0106100,OS01G0815700,OS02G0709800,OS01G0106700,OS02G0717400,OS01G0246100,OS05G0516900,OS08G0154600,OS12G0641500,OS06G0606900,OS01G0208…
GO:BP	macromolecule modification	GO:0043412	0.047820115704299976	4094	304	98	18096	OS07G0131500,OS01G0176300,OS01G0206700,OS10G0558600,OS05G0445900,OS01G0668600,OS07G0260000,OS04G0220300,OS06G0557700,OS02G0132100,OS11G0680200,OS04G0492500,OS02G0821800,OS12G0433500,OS03G0781100,OS10G0477200,OS04G0503200,OS03G0363700,OS11G0586001,OS12G0596000,OS09G0413300,OS06G0165500,OS01G0737900,OS03G0307800,OS03G0192800,OS07G0109600,OS05G0557700,OS01G0116900,OS09G0359800,OS01G0674100,OS05G0179…
GO:CC	intracellular	GO:0005622	0.000026397183756587754	11422	298	227	18385	OS10G0464000,OS01G0176300,OS01G0206700,OS10G0558600,OS05G0445900,OS08G0556500,OS09G0544400,OS07G0260000,OS02G0132100,OS02G0530100,OS03G0165300,OS02G0821800,OS07G0409400,OS12G0433500,OS07G0530100,OS01G0826000,OS12G0273900,OS03G0781100,OS10G0477200,OS03G0363700,OS03G0431200,OS01G0574400,OS11G0586001,OS04G0433800,OS03G0852200,OS09G0413300,OS08G0450700,OS02G0823900,OS02G0550300,OS01G0737900,OS04G0661…
GO:CC	intracellular part	GO:0044424	0.00016648996975219768	11203	298	221	18385	OS10G0464000,OS01G0176300,OS01G0206700,OS10G0558600,OS05G0445900,OS08G0556500,OS09G0544400,OS07G0260000,OS02G0132100,OS02G0530100,OS03G0165300,OS02G0821800,OS07G0409400,OS12G0433500,OS07G0530100,OS01G0826000,OS12G0273900,OS03G0781100,OS10G0477200,OS03G0363700,OS03G0431200,OS01G0574400,OS11G0586001,OS04G0433800,OS03G0852200,OS09G0413300,OS08G0450700,OS02G0823900,OS02G0550300,OS01G0737900,OS04G0661…
GO:CC	cell part	GO:0044464	0.00020349606833837576	13779	298	257	18385	OS10G0464000,OS07G0131500,OS01G0176300,OS01G0206700,OS06G0113150,OS10G0558600,OS05G0445900,OS08G0556500,OS09G0544400,OS01G0668600,OS07G0260000,OS06G0557700,OS02G0132100,OS02G0530100,OS04G0524600,OS03G0165300,OS02G0821800,OS07G0409400,OS12G0433500,OS07G0530100,OS01G0826000,OS12G0273900,OS03G0781100,OS10G0477200,OS04G0512900,OS03G0363700,OS03G0431200,OS01G0574400,OS11G0586001,OS04G0433800,OS03G0852…
GO:CC	cell	GO:0005623	0.00033965724106012443	13830	298	257	18385	OS10G0464000,OS07G0131500,OS01G0176300,OS01G0206700,OS06G0113150,OS10G0558600,OS05G0445900,OS08G0556500,OS09G0544400,OS01G0668600,OS07G0260000,OS06G0557700,OS02G0132100,OS02G0530100,OS04G0524600,OS03G0165300,OS02G0821800,OS07G0409400,OS12G0433500,OS07G0530100,OS01G0826000,OS12G0273900,OS03G0781100,OS10G0477200,OS04G0512900,OS03G0363700,OS03G0431200,OS01G0574400,OS11G0586001,OS04G0433800,OS03G0852…
GO:CC	cytoplasm	GO:0005737	0.005739386676861832	7312	298	153	18385	OS10G0464000,OS01G0206700,OS10G0558600,OS08G0556500,OS09G0544400,OS02G0132100,OS02G0530100,OS07G0409400,OS12G0433500,OS01G0826000,OS12G0273900,OS03G0363700,OS03G0431200,OS01G0574400,OS11G0586001,OS04G0433800,OS03G0852200,OS09G0413300,OS08G0450700,OS02G0550300,OS06G0264300,OS03G0370200,OS03G0796400,OS01G0720600,OS05G0557700,OS12G0291000,OS01G0952600,OS09G0359800,OS08G0295300,OS02G0201900,OS12G0182…
GO:CC	membrane-bounded organelle	GO:0043227	0.035505883940873444	8827	298	174	18385	OS10G0464000,OS01G0176300,OS10G0558600,OS05G0445900,OS08G0556500,OS07G0260000,OS02G0132100,OS03G0165300,OS02G0821800,OS07G0409400,OS07G0530100,OS12G0273900,OS03G0781100,OS10G0477200,OS03G0363700,OS01G0574400,OS11G0586001,OS04G0433800,OS03G0852200,OS09G0413300,OS08G0450700,OS02G0823900,OS02G0550300,OS01G0737900,OS04G0661200,OS03G0307800,OS03G0192800,OS06G0264300,OS03G0370200,OS01G0737300,OS07G0109…

## Sheet: BvPsJN
source	term_name	term_id	adjusted_p_value	term_size	query_size	intersection_size	effective_domain_size	intersections
GO:MF	unfolded protein binding	GO:0051082	1.1061024032364083e-8	156	303	18	19516	OS06G0253100,OS10G0462900,OS01G0840100,OS05G0460000,OS03G0366000,OS02G0782500,OS03G0143400,OS03G0276500,OS05G0540300,OS06G0231300,OS07G0641700,OS02G0115900,OS09G0534600,OS06G0116800,OS04G0551800,OS09G0537600,OS03G0804800,OS05G0147400
GO:MF	protein folding chaperone	GO:0044183	0.000001388253764823517	51	303	10	19516	OS10G0462900,OS01G0840100,OS05G0460000,OS03G0143400,OS03G0276500,OS05G0540300,OS02G0115900,OS04G0551800,OS03G0804800,OS05G0147400
GO:MF	heat shock protein binding	GO:0031072	0.0035552015688839994	51	303	7	19516	OS01G0840100,OS05G0460000,OS03G0276500,OS02G0115900,OS06G0116800,OS02G0644100,OS03G0381300
GO:BP	'de novo' protein folding	GO:0006458	5.6015914441267924e-8	73	279	13	18096	OS10G0462900,OS01G0840100,OS05G0460000,OS03G0366000,OS03G0143400,OS03G0276500,OS05G0540300,OS07G0641700,OS02G0115900,OS06G0116800,OS04G0551800,OS03G0804800,OS05G0147400
GO:BP	response to heat	GO:0009408	4.457124902129056e-7	142	279	16	18096	OS06G0253100,OS02G0181900,OS06G0592500,OS01G0840100,OS05G0460000,OS02G0782500,OS02G0758000,OS03G0276500,OS06G0682900,OS02G0115900,OS10G0419300,OS09G0534600,OS06G0116800,OS03G0643300,OS02G0612900,OS07G0184900
GO:BP	protein folding	GO:0006457	5.379932405555862e-7	236	279	20	18096	OS06G0253100,OS02G0181900,OS10G0462900,OS01G0840100,OS05G0460000,OS03G0366000,OS02G0782500,OS03G0143400,OS03G0276500,OS05G0540300,OS06G0231300,OS07G0641700,OS02G0115900,OS09G0534600,OS06G0116800,OS04G0551800,OS03G0381300,OS09G0537600,OS03G0804800,OS05G0147400
GO:BP	chaperone-mediated protein folding	GO:0061077	0.0000016751738617608582	95	279	13	18096	OS10G0462900,OS01G0840100,OS05G0460000,OS03G0366000,OS03G0143400,OS03G0276500,OS05G0540300,OS07G0641700,OS02G0115900,OS06G0116800,OS04G0551800,OS03G0804800,OS05G0147400
GO:BP	protein refolding	GO:0042026	0.0000049465101779557386	53	279	10	18096	OS02G0181900,OS10G0462900,OS01G0840100,OS05G0460000,OS03G0143400,OS03G0276500,OS05G0540300,OS02G0115900,OS06G0116800,OS09G0537600
GO:BP	response to unfolded protein	GO:0006986	0.002299835929513153	42	279	7	18096	OS01G0840100,OS05G0460000,OS03G0366000,OS03G0276500,OS07G0641700,OS02G0115900,OS12G0514100
GO:BP	response to temperature stimulus	GO:0009266	0.003102468181224801	268	279	16	18096	OS06G0253100,OS02G0181900,OS06G0592500,OS01G0840100,OS05G0460000,OS02G0782500,OS02G0758000,OS03G0276500,OS06G0682900,OS02G0115900,OS10G0419300,OS09G0534600,OS06G0116800,OS03G0643300,OS02G0612900,OS07G0184900
GO:BP	chaperone cofactor-dependent protein refolding	GO:0051085	0.004328860357922321	46	279	7	18096	OS01G0840100,OS05G0460000,OS03G0366000,OS03G0276500,OS07G0641700,OS02G0115900,OS06G0116800
GO:BP	'de novo' posttranslational protein folding	GO:0051084	0.005800214234103697	48	279	7	18096	OS01G0840100,OS05G0460000,OS03G0366000,OS03G0276500,OS07G0641700,OS02G0115900,OS06G0116800
GO:BP	protein import into mitochondrial intermembrane space	GO:0045041	0.01009781238677194	4	279	3	18096	OS10G0462900,OS03G0143400,OS05G0540300
GO:BP	response to topologically incorrect protein	GO:0035966	0.016446444473609746	56	279	7	18096	OS01G0840100,OS05G0460000,OS03G0366000,OS03G0276500,OS07G0641700,OS02G0115900,OS12G0514100
GO:CC	cytoplasm	GO:0005737	0.0000444992505555872	7312	279	153	18385	OS09G0396900,OS05G0412800,OS01G0280500,OS07G0611400,OS06G0253100,OS02G0181900,OS04G0581100,OS10G0462900,OS04G0482300,OS01G0280400,OS01G0840100,OS03G0236200,OS05G0460000,OS10G0506200,OS01G0949700,OS02G0584800,OS03G0366000,OS02G0782500,OS02G0758000,OS04G0600300,OS09G0298200,OS03G0143400,OS01G0276200,OS03G0276500,OS01G0949750,OS08G0141400,OS08G0191433,OS10G0529300,OS05G0540300,OS07G0194800,OS02G0694…
GO:CC	intracellular	GO:0005622	0.0024352848053617875	11422	279	207	18385	OS09G0396900,OS05G0412800,OS01G0280500,OS07G0611400,OS06G0253100,OS02G0181900,OS04G0581100,OS10G0462900,OS04G0482300,OS01G0280400,OS06G0592500,OS01G0840100,OS03G0236200,OS03G0757600,OS05G0460000,OS01G0730700,OS10G0506200,OS01G0949700,OS02G0584800,OS03G0366000,OS02G0782500,OS02G0758000,OS04G0600300,OS09G0298200,OS03G0143400,OS03G0370500,OS03G0841600,OS01G0276200,OS03G0276500,OS01G0949750,OS08G0141…
GO:CC	intracellular part	GO:0044424	0.004173481747662381	11203	279	203	18385	OS09G0396900,OS05G0412800,OS01G0280500,OS07G0611400,OS06G0253100,OS02G0181900,OS04G0581100,OS10G0462900,OS04G0482300,OS01G0280400,OS06G0592500,OS01G0840100,OS03G0236200,OS03G0757600,OS05G0460000,OS01G0730700,OS10G0506200,OS01G0949700,OS02G0584800,OS03G0366000,OS02G0782500,OS02G0758000,OS04G0600300,OS09G0298200,OS03G0143400,OS03G0370500,OS03G0841600,OS01G0276200,OS03G0276500,OS01G0949750,OS08G0141…
GO:CC	cytoplasmic part	GO:0044444	0.005172623925369057	5706	279	119	18385	OS09G0396900,OS01G0280500,OS06G0253100,OS02G0181900,OS04G0581100,OS10G0462900,OS01G0280400,OS03G0236200,OS10G0506200,OS03G0366000,OS02G0758000,OS04G0600300,OS09G0298200,OS03G0143400,OS01G0276200,OS08G0141400,OS08G0191433,OS05G0540300,OS07G0194800,OS07G0597200,OS08G0563300,OS03G0709000,OS12G0285600,OS10G0114300,OS06G0160700,OS07G0641700,OS07G0694700,OS07G0546750,OS02G0115900,OS04G0600200,OS01G0555…
GO:CC	cytosol	GO:0005829	0.020728589444884836	1366	279	39	18385	OS01G0280500,OS10G0462900,OS03G0236200,OS10G0506200,OS03G0143400,OS05G0540300,OS12G0285600,OS10G0114300,OS04G0485400,OS09G0534600,OS06G0693500,OS07G0563700,OS04G0551800,OS03G0381300,OS09G0558900,OS07G0450000,OS02G0814700,OS03G0801800,OS05G0495100,OS02G0625500,OS03G0254800,OS08G0126300,OS12G0443500,OS07G0531700,OS07G0613300,OS03G0136900,OS08G0230300,OS03G0200500,OS06G0115500,OS10G0159800,OS10G0155…
KEGG	Ribosome biogenesis in eukaryotes	KEGG:03008	0.0357610048768019	60	68	6	3410	OS01G0280500,OS03G0370500,OS07G0603200,OS12G0609800,OS07G0636000,OS03G0801800

## Sheet: PsJN only
source	term_name	term_id	adjusted_p_value	term_size	query_size	intersection_size	effective_domain_size	intersections
GO:MF	RNA binding	GO:0003723	4.423855697769152e-8	1730	319	65	19516	OS04G0627900,OS07G0603100,OS01G0301700,OS06G0358800,OS03G0625900,OS08G0399600,OS01G0170800,OS02G0102400,OS12G0133050,OS05G0519500,OS05G0176000,OS11G0657300,OS02G0103900,OS03G0352300,OS03G0831100,OS03G0123200,OS03G0410900,OS08G0107900,OS05G0597100,OS05G0145300,OS02G0146600,OS07G0203300,OS04G0605900,OS02G0134300,OS01G0785700,OS12G0279000,OS03G0350100,OS04G0520000,OS02G0220600,OS02G0321900,OS04G0620…
GO:MF	structural constituent of ribosome	GO:0003735	0.00011486826126240784	414	319	23	19516	OS02G0102400,OS12G0133050,OS01G0191100,OS03G0390000,OS04G0605900,OS02G0321900,OS07G0229900,OS07G0616600,OS03G0402400,OS05G0346300,OS08G0530200,OS02G0489400,OS02G0287000,OS11G0634500,OS07G0546700,OS05G0243300,OS08G0156800,OS07G0658200,OS01G0896700,OS12G0406200,OS11G0220800,OS04G0501000,OS12G0616200
GO:MF	translation factor activity, RNA binding	GO:0008135	0.0010325851506057602	165	319	13	19516	OS04G0627900,OS08G0399600,OS02G0146600,OS02G0134300,OS02G0220600,OS05G0227700,OS03G0565500,OS06G0571400,OS07G0614500,OS12G0607100,OS04G0270100,OS03G0182700,OS02G0122300
GO:MF	structural molecule activity	GO:0005198	0.001045784355224256	506	319	24	19516	OS02G0102400,OS12G0133050,OS01G0191100,OS03G0390000,OS04G0605900,OS02G0321900,OS07G0229900,OS07G0616600,OS03G0402400,OS05G0346300,OS08G0530200,OS02G0489400,OS02G0287000,OS11G0634500,OS07G0546700,OS05G0243300,OS08G0156800,OS07G0658200,OS01G0896700,OS11G0104900,OS12G0406200,OS11G0220800,OS04G0501000,OS12G0616200
GO:MF	translation regulator activity	GO:0045182	0.0018533192468580964	174	319	13	19516	OS04G0627900,OS08G0399600,OS02G0146600,OS02G0134300,OS02G0220600,OS05G0227700,OS03G0565500,OS06G0571400,OS07G0614500,OS12G0607100,OS04G0270100,OS03G0182700,OS02G0122300
GO:MF	translation regulator activity, nucleic acid binding	GO:0090079	0.0018533192468580964	174	319	13	19516	OS04G0627900,OS08G0399600,OS02G0146600,OS02G0134300,OS02G0220600,OS05G0227700,OS03G0565500,OS06G0571400,OS07G0614500,OS12G0607100,OS04G0270100,OS03G0182700,OS02G0122300
GO:MF	snoRNA binding	GO:0030515	0.011491309800822467	24	319	5	19516	OS03G0625900,OS05G0519500,OS02G0103900,OS03G0352300,OS03G0350100
GO:MF	catalytic activity, acting on RNA	GO:0140098	0.019819052033154733	529	319	22	19516	OS06G0358800,OS05G0176000,OS08G0177800,OS02G0616800,OS08G0148600,OS05G0597100,OS02G0146600,OS03G0775300,OS12G0279000,OS07G0615800,OS05G0150900,OS02G0606300,OS11G0615100,OS09G0551300,OS08G0150800,OS09G0246200,OS05G0558900,OS06G0697400,OS10G0537600,OS03G0835800,OS07G0471000,OS01G0276800
GO:MF	translation elongation factor activity	GO:0003746	0.0386650184393658	48	319	6	19516	OS08G0399600,OS02G0134300,OS02G0220600,OS03G0565500,OS06G0571400,OS07G0614500
GO:BP	ribonucleoprotein complex biogenesis	GO:0022613	9.906507390884882e-18	529	298	46	18096	OS03G0625900,OS05G0295900,OS12G0133050,OS05G0519500,OS05G0176000,OS11G0657300,OS01G0962500,OS02G0103900,OS03G0352300,OS03G0300300,OS03G0410900,OS03G0390000,OS07G0203300,OS04G0605900,OS01G0810000,OS12G0279000,OS11G0105400,OS03G0350100,OS07G0600400,OS04G0520000,OS06G0109400,OS02G0321900,OS07G0435400,OS07G0616600,OS04G0620700,OS03G0402400,OS09G0551300,OS05G0346300,OS05G0350500,OS05G0227700,OS02G0489…
GO:BP	rRNA processing	GO:0006364	7.164108385625366e-14	247	298	29	18096	OS03G0625900,OS05G0295900,OS05G0519500,OS05G0176000,OS01G0962500,OS02G0103900,OS03G0352300,OS03G0300300,OS03G0390000,OS07G0203300,OS04G0605900,OS01G0810000,OS12G0279000,OS11G0105400,OS03G0350100,OS07G0600400,OS04G0520000,OS02G0321900,OS07G0435400,OS07G0616600,OS04G0620700,OS03G0402400,OS09G0551300,OS05G0346300,OS02G0489400,OS02G0728700,OS02G0550700,OS07G0658200,OS03G0699200
GO:BP	rRNA metabolic process	GO:0016072	8.917755968763214e-14	249	298	29	18096	OS03G0625900,OS05G0295900,OS05G0519500,OS05G0176000,OS01G0962500,OS02G0103900,OS03G0352300,OS03G0300300,OS03G0390000,OS07G0203300,OS04G0605900,OS01G0810000,OS12G0279000,OS11G0105400,OS03G0350100,OS07G0600400,OS04G0520000,OS02G0321900,OS07G0435400,OS07G0616600,OS04G0620700,OS03G0402400,OS09G0551300,OS05G0346300,OS02G0489400,OS02G0728700,OS02G0550700,OS07G0658200,OS03G0699200
GO:BP	ribosome biogenesis	GO:0042254	4.1098672802677773e-13	423	298	36	18096	OS03G0625900,OS05G0295900,OS12G0133050,OS05G0519500,OS05G0176000,OS01G0962500,OS02G0103900,OS03G0352300,OS03G0300300,OS03G0390000,OS07G0203300,OS04G0605900,OS01G0810000,OS12G0279000,OS11G0105400,OS03G0350100,OS07G0600400,OS04G0520000,OS06G0109400,OS02G0321900,OS07G0435400,OS07G0616600,OS04G0620700,OS03G0402400,OS09G0551300,OS05G0346300,OS05G0350500,OS02G0489400,OS02G0728700,OS02G0550700,OS08G0156…
GO:BP	ncRNA processing	GO:0034470	1.3747823108864383e-12	390	298	34	18096	OS03G0625900,OS05G0295900,OS05G0519500,OS05G0176000,OS01G0962500,OS02G0103900,OS03G0352300,OS03G0300300,OS03G0390000,OS07G0203300,OS04G0605900,OS01G0810000,OS03G0775300,OS12G0279000,OS11G0105400,OS03G0350100,OS02G0606300,OS07G0600400,OS04G0520000,OS02G0321900,OS07G0435400,OS07G0616600,OS04G0620700,OS03G0402400,OS09G0551300,OS05G0346300,OS03G0347200,OS04G0484900,OS02G0489400,OS02G0728700,OS02G0550…
GO:BP	ncRNA metabolic process	GO:0034660	2.84182734913079e-12	476	298	37	18096	OS03G0625900,OS05G0295900,OS05G0519500,OS05G0176000,OS01G0962500,OS02G0103900,OS03G0352300,OS03G0300300,OS03G0390000,OS07G0203300,OS04G0605900,OS01G0810000,OS03G0775300,OS12G0279000,OS11G0105400,OS05G0150900,OS03G0350100,OS02G0606300,OS07G0600400,OS04G0520000,OS02G0321900,OS07G0435400,OS07G0616600,OS04G0620700,OS03G0402400,OS09G0551300,OS05G0346300,OS03G0347200,OS08G0150800,OS04G0484900,OS02G0489…
GO:BP	RNA processing	GO:0006396	2.456791467242326e-10	826	298	46	18096	OS06G0358800,OS03G0625900,OS05G0295900,OS05G0519500,OS05G0176000,OS11G0657300,OS01G0962500,OS02G0103900,OS03G0352300,OS03G0300300,OS03G0410900,OS08G0107900,OS08G0148600,OS05G0597100,OS03G0390000,OS07G0203300,OS04G0605900,OS01G0810000,OS03G0775300,OS12G0279000,OS11G0105400,OS03G0350100,OS02G0606300,OS07G0600400,OS04G0520000,OS02G0321900,OS07G0435400,OS07G0616600,OS04G0620700,OS03G0402400,OS09G0551…
GO:BP	cellular component biogenesis	GO:0044085	8.272037390610639e-10	1241	298	57	18096	OS08G0334900,OS03G0625900,OS05G0295900,OS12G0133050,OS05G0519500,OS05G0176000,OS11G0657300,OS01G0135900,OS01G0962500,OS02G0103900,OS03G0352300,OS03G0300300,OS03G0410900,OS09G0267500,OS03G0390000,OS07G0203300,OS04G0605900,OS01G0810000,OS12G0279000,OS11G0105400,OS03G0350100,OS07G0600400,OS04G0520000,OS06G0109400,OS02G0321900,OS07G0435400,OS07G0616600,OS04G0620700,OS03G0402400,OS09G0551300,OS05G0346…
GO:BP	peptide metabolic process	GO:0006518	2.240626183723169e-9	948	298	48	18096	OS01G0949800,OS10G0527400,OS10G0528100,OS10G0528300,OS10G0527800,OS04G0627900,OS08G0399600,OS02G0102400,OS12G0133050,OS03G0831100,OS01G0191100,OS08G0107900,OS02G0616800,OS03G0390000,OS02G0146600,OS04G0605900,OS02G0134300,OS05G0150900,OS02G0220600,OS02G0321900,OS07G0229900,OS07G0616600,OS03G0402400,OS05G0346300,OS05G0227700,OS03G0565500,OS08G0150800,OS08G0530200,OS06G0571400,OS02G0489400,OS02G0287…
GO:BP	cellular nitrogen compound metabolic process	GO:0034641	7.2712466330948844e-9	5666	298	149	18096	OS01G0949800,OS10G0527400,OS10G0528100,OS11G0664800,OS10G0528300,OS10G0527800,OS04G0627900,OS04G0566600,OS04G0488100,OS01G0723600,OS01G0301700,OS03G0188900,OS06G0358800,OS07G0640000,OS03G0625900,OS08G0399600,OS01G0170800,OS08G0175300,OS05G0295900,OS02G0102400,OS12G0133050,OS05G0519500,OS02G0497500,OS05G0176000,OS11G0657300,OS01G0962500,OS02G0103900,OS03G0352300,OS03G0831100,OS01G0951200,OS01G0191…
GO:BP	cellular amide metabolic process	GO:0043603	1.695257588844219e-8	1076	298	50	18096	OS01G0949800,OS10G0527400,OS10G0528100,OS10G0528300,OS10G0527800,OS04G0627900,OS08G0399600,OS02G0102400,OS12G0133050,OS03G0831100,OS01G0191100,OS08G0107900,OS02G0616800,OS03G0390000,OS02G0146600,OS04G0605900,OS02G0134300,OS05G0150900,OS02G0220600,OS02G0321900,OS07G0229900,OS07G0616600,OS03G0402400,OS05G0346300,OS05G0227700,OS03G0698900,OS03G0565500,OS08G0150800,OS08G0530200,OS06G0571400,OS02G0489…
GO:BP	translation	GO:0006412	1.8775099512340312e-8	799	298	42	18096	OS04G0627900,OS08G0399600,OS02G0102400,OS12G0133050,OS03G0831100,OS01G0191100,OS08G0107900,OS02G0616800,OS03G0390000,OS02G0146600,OS04G0605900,OS02G0134300,OS05G0150900,OS02G0220600,OS02G0321900,OS07G0229900,OS07G0616600,OS03G0402400,OS05G0346300,OS05G0227700,OS03G0565500,OS08G0150800,OS08G0530200,OS06G0571400,OS02G0489400,OS02G0287000,OS11G0634500,OS07G0614500,OS07G0546700,OS05G0243300,OS08G0156…
GO:BP	peptide biosynthetic process	GO:0043043	3.503250101345538e-8	815	298	42	18096	OS04G0627900,OS08G0399600,OS02G0102400,OS12G0133050,OS03G0831100,OS01G0191100,OS08G0107900,OS02G0616800,OS03G0390000,OS02G0146600,OS04G0605900,OS02G0134300,OS05G0150900,OS02G0220600,OS02G0321900,OS07G0229900,OS07G0616600,OS03G0402400,OS05G0346300,OS05G0227700,OS03G0565500,OS08G0150800,OS08G0530200,OS06G0571400,OS02G0489400,OS02G0287000,OS11G0634500,OS07G0614500,OS07G0546700,OS05G0243300,OS08G0156…
GO:BP	amide biosynthetic process	GO:0043604	1.1634269597123241e-7	882	298	43	18096	OS04G0627900,OS08G0399600,OS02G0102400,OS12G0133050,OS03G0831100,OS01G0191100,OS08G0107900,OS02G0616800,OS03G0390000,OS02G0146600,OS04G0605900,OS02G0134300,OS05G0150900,OS02G0220600,OS02G0321900,OS07G0229900,OS07G0616600,OS03G0402400,OS05G0346300,OS05G0227700,OS03G0565500,OS08G0150800,OS08G0530200,OS06G0571400,OS02G0489400,OS02G0287000,OS11G0634500,OS07G0614500,OS07G0546700,OS05G0243300,OS08G0156…
GO:BP	gene expression	GO:0010467	1.660783468054133e-7	3976	298	113	18096	OS11G0664800,OS04G0627900,OS04G0566600,OS11G0167300,OS03G0188900,OS06G0358800,OS07G0640000,OS03G0625900,OS08G0399600,OS05G0295900,OS02G0102400,OS12G0133050,OS05G0519500,OS05G0176000,OS11G0657300,OS01G0962500,OS02G0103900,OS03G0352300,OS03G0831100,OS01G0191100,OS03G0300300,OS03G0410900,OS08G0107900,OS02G0616800,OS08G0148600,OS01G0229300,OS03G0851000,OS05G0597100,OS03G0390000,OS02G0146600,OS07G0203…
GO:BP	ribonucleoprotein complex assembly	GO:0022618	0.0000012727912030314119	232	298	20	18096	OS12G0133050,OS05G0519500,OS11G0657300,OS01G0962500,OS03G0410900,OS11G0105400,OS07G0616600,OS03G0402400,OS05G0227700,OS02G0728700,OS02G0102700,OS07G0546700,OS12G0607100,OS01G0896700,OS03G0182700,OS07G0178900,OS02G0122300,OS11G0220800,OS04G0501000,OS07G0608700
GO:BP	ribonucleoprotein complex subunit organization	GO:0071826	0.000002292777255740197	240	298	20	18096	OS12G0133050,OS05G0519500,OS11G0657300,OS01G0962500,OS03G0410900,OS11G0105400,OS07G0616600,OS03G0402400,OS05G0227700,OS02G0728700,OS02G0102700,OS07G0546700,OS12G0607100,OS01G0896700,OS03G0182700,OS07G0178900,OS02G0122300,OS11G0220800,OS04G0501000,OS07G0608700
GO:BP	cellular component organization or biogenesis	GO:0071840	0.000002995630060956063	2829	298	86	18096	OS08G0334900,OS03G0264800,OS04G0488100,OS07G0640000,OS03G0625900,OS05G0295900,OS09G0135100,OS12G0133050,OS05G0519500,OS02G0497500,OS05G0176000,OS11G0657300,OS01G0135900,OS01G0962500,OS02G0103900,OS12G0298950,OS03G0352300,OS03G0300300,OS03G0410900,OS10G0521300,OS09G0267500,OS03G0390000,OS07G0203300,OS04G0605900,OS01G0810000,OS02G0134300,OS12G0279000,OS11G0105400,OS03G0350100,OS07G0600400,OS04G0520…
GO:BP	maturation of 5.8S rRNA from tricistronic rRNA transcript (SSU-rRNA, 5.8S rRNA, LSU-rRNA)	GO:0000466	0.000008211831812790449	28	298	8	18096	OS07G0203300,OS07G0600400,OS04G0520000,OS07G0435400,OS07G0616600,OS03G0402400,OS02G0550700,OS03G0699200
GO:BP	organonitrogen compound biosynthetic process	GO:1901566	0.000018698659015729526	1615	298	57	18096	OS04G0627900,OS01G0723600,OS08G0399600,OS04G0271200,OS02G0102400,OS12G0133050,OS08G0559600,OS03G0831100,OS01G0951200,OS01G0191100,OS08G0107900,OS02G0616800,OS03G0718000,OS03G0390000,OS02G0146600,OS04G0605900,OS02G0134300,OS04G0518000,OS04G0503700,OS01G0356500,OS05G0150900,OS02G0220600,OS02G0321900,OS02G0131200,OS07G0229900,OS07G0616600,OS03G0402400,OS05G0346300,OS05G0227700,OS03G0698900,OS03G0565…
GO:BP	cytoplasmic translation	GO:0002181	0.00009161847318711315	103	298	12	18096	OS12G0133050,OS01G0191100,OS04G0605900,OS05G0346300,OS05G0227700,OS08G0530200,OS02G0287000,OS12G0607100,OS04G0270100,OS03G0182700,OS02G0122300,OS12G0406200
GO:BP	maturation of 5.8S rRNA	GO:0000460	0.0001388837965907827	39	298	8	18096	OS07G0203300,OS07G0600400,OS04G0520000,OS07G0435400,OS07G0616600,OS03G0402400,OS02G0550700,OS03G0699200
GO:BP	ribosomal large subunit biogenesis	GO:0042273	0.0001902102514137216	110	298	12	18096	OS12G0133050,OS01G0962500,OS04G0605900,OS11G0105400,OS07G0600400,OS02G0321900,OS07G0435400,OS09G0551300,OS01G0896700,OS03G0699200,OS11G0220800,OS04G0501000
GO:BP	cellular protein-containing complex assembly	GO:0034622	0.0005031447413583643	562	298	27	18096	OS12G0133050,OS05G0519500,OS11G0657300,OS01G0962500,OS03G0410900,OS11G0105400,OS07G0616600,OS03G0402400,OS05G0227700,OS02G0742200,OS08G0178100,OS03G0737200,OS02G0728700,OS02G0102700,OS07G0546700,OS12G0607100,OS01G0896700,OS03G0182700,OS07G0178900,OS02G0205300,OS01G0337900,OS02G0122300,OS11G0104900,OS08G0240800,OS11G0220800,OS04G0501000,OS07G0608700
GO:BP	ribosomal small subunit biogenesis	GO:0042274	0.0005537089612838795	100	298	11	18096	OS05G0519500,OS02G0103900,OS03G0390000,OS07G0203300,OS01G0810000,OS07G0616600,OS03G0402400,OS05G0346300,OS02G0489400,OS02G0728700,OS07G0658200
GO:BP	cellular nitrogen compound biosynthetic process	GO:0044271	0.0007976901655940983	3603	298	94	18096	OS11G0664800,OS04G0627900,OS04G0566600,OS01G0723600,OS03G0188900,OS07G0640000,OS08G0399600,OS08G0175300,OS02G0102400,OS12G0133050,OS02G0497500,OS03G0831100,OS01G0951200,OS01G0191100,OS08G0107900,OS02G0616800,OS01G0229300,OS03G0346900,OS03G0718000,OS03G0851000,OS06G0168600,OS03G0390000,OS02G0146600,OS04G0605900,OS02G0134300,OS04G0518000,OS01G0356500,OS07G0615800,OS05G0150900,OS11G0615100,OS09G0532…
GO:BP	nitrogen compound metabolic process	GO:0006807	0.0008455499797139391	9952	298	204	18096	OS01G0949800,OS10G0527400,OS10G0528100,OS11G0664800,OS10G0528300,OS10G0527800,OS04G0627900,OS04G0566600,OS04G0534166,OS04G0488100,OS01G0723600,OS02G0293400,OS01G0301700,OS08G0138700,OS03G0188900,OS06G0358800,OS07G0640000,OS03G0625900,OS08G0399600,OS01G0170800,OS08G0527600,OS08G0175300,OS02G0528000,OS11G0552000,OS09G0339000,OS04G0271200,OS05G0295900,OS11G0691280,OS02G0227900,OS02G0102400,OS12G0133…
GO:BP	protein-containing complex assembly	GO:0065003	0.0009274505704792002	616	298	28	18096	OS12G0133050,OS05G0519500,OS11G0657300,OS01G0135900,OS01G0962500,OS03G0410900,OS11G0105400,OS07G0616600,OS03G0402400,OS05G0227700,OS02G0742200,OS08G0178100,OS03G0737200,OS02G0728700,OS02G0102700,OS07G0546700,OS12G0607100,OS01G0896700,OS03G0182700,OS07G0178900,OS02G0205300,OS01G0337900,OS02G0122300,OS11G0104900,OS08G0240800,OS11G0220800,OS04G0501000,OS07G0608700
GO:BP	macromolecule localization	GO:0033036	0.0018942226007524108	948	298	36	18096	OS08G0554900,OS07G0271000,OS09G0135100,OS01G0962500,OS12G0128600,OS08G0107900,OS10G0521300,OS08G0535600,OS01G0235400,OS01G0283500,OS07G0291200,OS02G0313700,OS04G0520000,OS01G0277600,OS03G0173500,OS02G0173800,OS07G0616600,OS03G0402400,OS03G0347200,OS08G0338700,OS05G0350500,OS11G0181100,OS04G0394300,OS03G0825400,OS08G0178100,OS06G0669600,OS02G0690700,OS11G0104900,OS10G0578000,OS08G0412600,OS02G0786…
GO:BP	maturation of LSU-rRNA	GO:0000470	0.0025582527917341865	40	298	7	18096	OS01G0962500,OS04G0605900,OS07G0600400,OS02G0321900,OS07G0435400,OS09G0551300,OS03G0699200
GO:BP	maturation of LSU-rRNA from tricistronic rRNA transcript (SSU-rRNA, 5.8S rRNA, LSU-rRNA)	GO:0000463	0.003148570467100583	16	298	5	18096	OS01G0962500,OS04G0605900,OS07G0600400,OS07G0435400,OS03G0699200
GO:BP	rRNA 3'-end processing	GO:0031125	0.004400505092506177	17	298	5	18096	OS12G0279000,OS04G0520000,OS07G0616600,OS03G0402400,OS02G0550700
GO:BP	protein-containing complex subunit organization	GO:0043933	0.004862282256227991	710	298	29	18096	OS12G0133050,OS05G0519500,OS11G0657300,OS01G0135900,OS01G0962500,OS03G0410900,OS11G0105400,OS07G0616600,OS03G0402400,OS05G0227700,OS02G0742200,OS08G0178100,OS03G0737200,OS02G0728700,OS02G0102700,OS07G0546700,OS12G0607100,OS04G0270100,OS01G0896700,OS03G0182700,OS07G0178900,OS02G0205300,OS01G0337900,OS02G0122300,OS11G0104900,OS08G0240800,OS11G0220800,OS04G0501000,OS07G0608700
GO:BP	nucleobase-containing compound metabolic process	GO:0006139	0.009097118774526933	4720	298	111	18096	OS11G0664800,OS04G0566600,OS04G0488100,OS01G0723600,OS01G0301700,OS03G0188900,OS06G0358800,OS07G0640000,OS03G0625900,OS01G0170800,OS08G0175300,OS05G0295900,OS05G0519500,OS02G0497500,OS05G0176000,OS11G0657300,OS01G0962500,OS02G0103900,OS03G0352300,OS01G0951200,OS03G0300300,OS08G0177800,OS03G0410900,OS08G0107900,OS05G0540100,OS08G0148600,OS01G0229300,OS03G0346900,OS03G0851000,OS06G0168600,OS05G0597…
GO:BP	cellular component assembly	GO:0022607	0.01183576743926889	784	298	30	18096	OS12G0133050,OS05G0519500,OS11G0657300,OS01G0135900,OS01G0962500,OS03G0410900,OS09G0267500,OS11G0105400,OS07G0616600,OS03G0402400,OS05G0227700,OS09G0422600,OS02G0742200,OS08G0178100,OS03G0737200,OS02G0728700,OS02G0102700,OS07G0546700,OS12G0607100,OS01G0896700,OS03G0182700,OS07G0178900,OS02G0205300,OS01G0337900,OS02G0122300,OS11G0104900,OS08G0240800,OS11G0220800,OS04G0501000,OS07G0608700
GO:BP	ncRNA 3'-end processing	GO:0043628	0.012356320167154572	34	298	6	18096	OS05G0176000,OS12G0279000,OS04G0520000,OS07G0616600,OS03G0402400,OS02G0550700
GO:BP	maturation of SSU-rRNA from tricistronic rRNA transcript (SSU-rRNA, 5.8S rRNA, LSU-rRNA)	GO:0000462	0.01761563345986473	53	298	7	18096	OS05G0519500,OS02G0103900,OS07G0203300,OS07G0616600,OS03G0402400,OS02G0489400,OS07G0658200
GO:BP	macromolecule biosynthetic process	GO:0009059	0.018980479642850864	3719	298	91	18096	OS11G0664800,OS08G0334900,OS04G0627900,OS04G0566600,OS05G0580000,OS03G0188900,OS07G0640000,OS08G0399600,OS08G0175300,OS02G0102400,OS12G0133050,OS02G0497500,OS03G0831100,OS01G0191100,OS08G0107900,OS05G0540100,OS02G0616800,OS01G0229300,OS03G0346900,OS03G0851000,OS06G0168600,OS03G0390000,OS02G0146600,OS04G0605900,OS02G0134300,OS04G0503700,OS07G0615800,OS05G0150900,OS11G0615100,OS09G0532900,OS06G0109…
GO:BP	cellular macromolecule localization	GO:0070727	0.019576939339992667	647	298	26	18096	OS08G0554900,OS09G0135100,OS10G0521300,OS01G0235400,OS01G0283500,OS07G0291200,OS04G0520000,OS03G0173500,OS07G0616600,OS03G0402400,OS03G0347200,OS08G0338700,OS05G0350500,OS11G0181100,OS03G0825400,OS08G0178100,OS06G0669600,OS02G0690700,OS11G0104900,OS10G0578000,OS08G0412600,OS02G0786000,OS03G0835800,OS01G0739000,OS07G0575100,OS04G0618500
GO:BP	protein transport	GO:0015031	0.01963463080172555	686	298	27	18096	OS07G0271000,OS09G0135100,OS12G0128600,OS10G0521300,OS08G0535600,OS01G0235400,OS01G0283500,OS07G0291200,OS03G0173500,OS07G0616600,OS03G0402400,OS03G0347200,OS08G0338700,OS05G0350500,OS03G0825400,OS08G0178100,OS06G0669600,OS02G0690700,OS11G0104900,OS10G0578000,OS08G0412600,OS02G0786000,OS03G0835800,OS01G0739000,OS07G0575100,OS04G0618500,OS03G0856200
GO:BP	RNA metabolic process	GO:0016070	0.02028889754896941	3778	298	92	18096	OS11G0664800,OS04G0566600,OS01G0301700,OS03G0188900,OS06G0358800,OS07G0640000,OS03G0625900,OS01G0170800,OS05G0295900,OS05G0519500,OS05G0176000,OS11G0657300,OS01G0962500,OS02G0103900,OS03G0352300,OS03G0300300,OS08G0177800,OS03G0410900,OS08G0107900,OS05G0540100,OS08G0148600,OS01G0229300,OS03G0346900,OS03G0851000,OS05G0597100,OS03G0390000,OS02G0146600,OS07G0203300,OS04G0605900,OS01G0810000,OS02G0134…
GO:BP	establishment of protein localization	GO:0045184	0.021716374805655442	690	298	27	18096	OS07G0271000,OS09G0135100,OS12G0128600,OS10G0521300,OS08G0535600,OS01G0235400,OS01G0283500,OS07G0291200,OS03G0173500,OS07G0616600,OS03G0402400,OS03G0347200,OS08G0338700,OS05G0350500,OS03G0825400,OS08G0178100,OS06G0669600,OS02G0690700,OS11G0104900,OS10G0578000,OS08G0412600,OS02G0786000,OS03G0835800,OS01G0739000,OS07G0575100,OS04G0618500,OS03G0856200
GO:BP	protein localization	GO:0008104	0.025933893634450235	777	298	29	18096	OS08G0554900,OS07G0271000,OS09G0135100,OS12G0128600,OS10G0521300,OS08G0535600,OS01G0235400,OS01G0283500,OS07G0291200,OS03G0173500,OS07G0616600,OS03G0402400,OS03G0347200,OS08G0338700,OS05G0350500,OS11G0181100,OS03G0825400,OS08G0178100,OS06G0669600,OS02G0690700,OS11G0104900,OS10G0578000,OS08G0412600,OS02G0786000,OS03G0835800,OS01G0739000,OS07G0575100,OS04G0618500,OS03G0856200
GO:BP	cellular macromolecule biosynthetic process	GO:0034645	0.0282130144431394	3651	298	89	18096	OS11G0664800,OS08G0334900,OS04G0627900,OS04G0566600,OS05G0580000,OS03G0188900,OS07G0640000,OS08G0399600,OS08G0175300,OS02G0102400,OS12G0133050,OS02G0497500,OS03G0831100,OS01G0191100,OS08G0107900,OS05G0540100,OS02G0616800,OS01G0229300,OS03G0851000,OS06G0168600,OS03G0390000,OS02G0146600,OS04G0605900,OS02G0134300,OS04G0503700,OS07G0615800,OS05G0150900,OS11G0615100,OS09G0532900,OS06G0109400,OS02G0220…
GO:BP	heterocycle metabolic process	GO:0046483	0.031170763775286933	4957	298	113	18096	OS11G0664800,OS04G0566600,OS04G0488100,OS01G0723600,OS01G0301700,OS03G0188900,OS06G0358800,OS07G0640000,OS03G0625900,OS01G0170800,OS08G0175300,OS05G0295900,OS05G0519500,OS02G0497500,OS05G0176000,OS11G0657300,OS01G0962500,OS02G0103900,OS03G0352300,OS01G0951200,OS03G0300300,OS08G0177800,OS03G0410900,OS08G0107900,OS05G0540100,OS08G0148600,OS01G0229300,OS03G0346900,OS03G0718000,OS03G0851000,OS06G0168…
GO:BP	cellular localization	GO:0051641	0.034960863100099625	831	298	30	18096	OS08G0554900,OS09G0135100,OS10G0521300,OS01G0235400,OS01G0283500,OS07G0291200,OS04G0520000,OS03G0173500,OS07G0616600,OS03G0402400,OS03G0347200,OS08G0338700,OS05G0350500,OS11G0181100,OS04G0394300,OS03G0825400,OS08G0178100,OS06G0669600,OS02G0690700,OS04G0455900,OS11G0104900,OS10G0578000,OS08G0412600,OS02G0786000,OS03G0835800,OS01G0739000,OS07G0575100,OS04G0618500,OS07G0524100,OS05G0490200
GO:BP	intracellular transport	GO:0046907	0.039742970031081216	675	298	26	18096	OS09G0135100,OS01G0235400,OS01G0283500,OS07G0291200,OS03G0173500,OS07G0616600,OS03G0402400,OS03G0347200,OS08G0338700,OS05G0350500,OS04G0394300,OS03G0825400,OS08G0178100,OS06G0669600,OS02G0690700,OS04G0455900,OS11G0104900,OS10G0578000,OS08G0412600,OS02G0786000,OS03G0835800,OS01G0739000,OS07G0575100,OS04G0618500,OS07G0524100,OS05G0490200
GO:BP	purine nucleoside monophosphate metabolic process	GO:0009126	0.04142239312030056	26	298	5	18096	OS04G0518000,OS02G0131200,OS12G0515600,OS03G0699200,OS09G0467100
GO:BP	purine ribonucleoside monophosphate metabolic process	GO:0009167	0.04142239312030056	26	298	5	18096	OS04G0518000,OS02G0131200,OS12G0515600,OS03G0699200,OS09G0467100
GO:BP	cellular protein localization	GO:0034613	0.0432232759684186	639	298	25	18096	OS08G0554900,OS09G0135100,OS10G0521300,OS01G0235400,OS01G0283500,OS07G0291200,OS03G0173500,OS07G0616600,OS03G0402400,OS03G0347200,OS08G0338700,OS05G0350500,OS11G0181100,OS03G0825400,OS08G0178100,OS06G0669600,OS02G0690700,OS11G0104900,OS10G0578000,OS08G0412600,OS02G0786000,OS03G0835800,OS01G0739000,OS07G0575100,OS04G0618500
GO:CC	protein-containing complex	GO:0032991	6.404133531396152e-13	3082	308	108	18385	OS07G0603100,OS04G0488100,OS01G0723600,OS06G0358800,OS03G0625900,OS02G0102400,OS12G0133050,OS07G0570100,OS05G0519500,OS02G0497500,OS05G0176000,OS11G0657300,OS01G0962500,OS02G0103900,OS12G0298950,OS03G0352300,OS01G0191100,OS03G0410900,OS08G0107900,OS08G0148600,OS03G0718000,OS06G0168600,OS03G0390000,OS07G0203300,OS04G0605900,OS01G0810000,OS01G0839500,OS02G0134300,OS11G0105400,OS07G0615800,OS03G0350…
GO:CC	intracellular organelle part	GO:0044446	7.157842324298319e-13	4018	308	128	18385	OS05G0168800,OS10G0415300,OS04G0488100,OS08G0138700,OS03G0625900,OS08G0399600,OS04G0271200,OS09G0135100,OS02G0102400,OS12G0133050,OS07G0570100,OS05G0519500,OS02G0497500,OS05G0176000,OS11G0657300,OS08G0559600,OS02G0103900,OS03G0352300,OS03G0831100,OS01G0191100,OS12G0128600,OS03G0300300,OS06G0498500,OS03G0410900,OS08G0107900,OS05G0540100,OS09G0267500,OS05G0597100,OS03G0390000,OS08G0535600,OS02G0146…
GO:CC	organelle part	GO:0044422	7.90822267980237e-13	4023	308	128	18385	OS05G0168800,OS10G0415300,OS04G0488100,OS08G0138700,OS03G0625900,OS08G0399600,OS04G0271200,OS09G0135100,OS02G0102400,OS12G0133050,OS07G0570100,OS05G0519500,OS02G0497500,OS05G0176000,OS11G0657300,OS08G0559600,OS02G0103900,OS03G0352300,OS03G0831100,OS01G0191100,OS12G0128600,OS03G0300300,OS06G0498500,OS03G0410900,OS08G0107900,OS05G0540100,OS09G0267500,OS05G0597100,OS03G0390000,OS08G0535600,OS02G0146…
GO:CC	ribonucleoprotein complex	GO:1990904	3.3109753994584676e-12	904	308	51	18385	OS07G0603100,OS06G0358800,OS03G0625900,OS02G0102400,OS12G0133050,OS05G0519500,OS05G0176000,OS11G0657300,OS01G0962500,OS02G0103900,OS03G0352300,OS01G0191100,OS03G0410900,OS08G0148600,OS03G0390000,OS07G0203300,OS04G0605900,OS01G0810000,OS11G0105400,OS03G0350100,OS07G0600400,OS02G0321900,OS07G0435400,OS07G0229900,OS07G0616600,OS04G0620700,OS03G0402400,OS05G0346300,OS03G0347200,OS05G0227700,OS08G0530…
GO:CC	non-membrane-bounded organelle	GO:0043228	6.063756981222934e-12	1514	308	68	18385	OS04G0488100,OS03G0625900,OS02G0102400,OS12G0133050,OS05G0519500,OS02G0497500,OS05G0176000,OS02G0103900,OS03G0352300,OS03G0831100,OS01G0191100,OS03G0300300,OS06G0498500,OS03G0410900,OS05G0540100,OS09G0267500,OS05G0597100,OS03G0390000,OS02G0146600,OS07G0203300,OS04G0605900,OS01G0810000,OS01G0839500,OS11G0105400,OS07G0615800,OS03G0350100,OS07G0600400,OS11G0615100,OS04G0520000,OS11G0482500,OS02G0321…
GO:CC	intracellular non-membrane-bounded organelle	GO:0043232	6.063756981222934e-12	1514	308	68	18385	OS04G0488100,OS03G0625900,OS02G0102400,OS12G0133050,OS05G0519500,OS02G0497500,OS05G0176000,OS02G0103900,OS03G0352300,OS03G0831100,OS01G0191100,OS03G0300300,OS06G0498500,OS03G0410900,OS05G0540100,OS09G0267500,OS05G0597100,OS03G0390000,OS02G0146600,OS07G0203300,OS04G0605900,OS01G0810000,OS01G0839500,OS11G0105400,OS07G0615800,OS03G0350100,OS07G0600400,OS11G0615100,OS04G0520000,OS11G0482500,OS02G0321…
GO:CC	organelle lumen	GO:0043233	1.571350156825661e-11	1041	308	54	18385	OS04G0488100,OS03G0625900,OS08G0399600,OS02G0102400,OS05G0519500,OS02G0497500,OS05G0176000,OS02G0103900,OS03G0352300,OS03G0831100,OS12G0128600,OS03G0300300,OS06G0498500,OS05G0540100,OS05G0597100,OS08G0535600,OS02G0146600,OS07G0203300,OS01G0810000,OS02G0134300,OS12G0279000,OS11G0105400,OS07G0615800,OS03G0350100,OS02G0606300,OS07G0600400,OS11G0615100,OS04G0520000,OS11G0482500,OS07G0435400,OS08G0500…
GO:CC	membrane-enclosed lumen	GO:0031974	1.571350156825661e-11	1041	308	54	18385	OS04G0488100,OS03G0625900,OS08G0399600,OS02G0102400,OS05G0519500,OS02G0497500,OS05G0176000,OS02G0103900,OS03G0352300,OS03G0831100,OS12G0128600,OS03G0300300,OS06G0498500,OS05G0540100,OS05G0597100,OS08G0535600,OS02G0146600,OS07G0203300,OS01G0810000,OS02G0134300,OS12G0279000,OS11G0105400,OS07G0615800,OS03G0350100,OS02G0606300,OS07G0600400,OS11G0615100,OS04G0520000,OS11G0482500,OS07G0435400,OS08G0500…
GO:CC	intracellular organelle lumen	GO:0070013	1.571350156825661e-11	1041	308	54	18385	OS04G0488100,OS03G0625900,OS08G0399600,OS02G0102400,OS05G0519500,OS02G0497500,OS05G0176000,OS02G0103900,OS03G0352300,OS03G0831100,OS12G0128600,OS03G0300300,OS06G0498500,OS05G0540100,OS05G0597100,OS08G0535600,OS02G0146600,OS07G0203300,OS01G0810000,OS02G0134300,OS12G0279000,OS11G0105400,OS07G0615800,OS03G0350100,OS02G0606300,OS07G0600400,OS11G0615100,OS04G0520000,OS11G0482500,OS07G0435400,OS08G0500…
GO:CC	cytoplasm	GO:0005737	1.6440423016636144e-9	7312	308	181	18385	OS01G0949800,OS10G0527400,OS10G0528100,OS08G0334900,OS10G0528300,OS10G0527800,OS05G0168800,OS07G0603100,OS10G0415300,OS01G0723600,OS09G0408550,OS02G0293400,OS01G0301700,OS11G0167300,OS05G0580000,OS08G0138700,OS06G0358800,OS07G0640000,OS08G0399600,OS01G0170800,OS08G0175300,OS04G0271200,OS04G0373000,OS09G0135100,OS02G0582600,OS02G0102400,OS12G0133050,OS07G0570100,OS02G0497500,OS01G0135900,OS04G0640…
GO:CC	intracellular	GO:0005622	1.8049793251450373e-9	11422	308	246	18385	OS01G0949800,OS10G0527400,OS10G0528100,OS11G0664800,OS08G0334900,OS10G0528300,OS10G0527800,OS05G0168800,OS07G0603100,OS04G0566600,OS10G0415300,OS05G0527000,OS04G0488100,OS01G0723600,OS09G0408550,OS02G0293400,OS01G0301700,OS11G0167300,OS05G0580000,OS08G0138700,OS03G0188900,OS06G0358800,OS07G0640000,OS03G0625900,OS08G0399600,OS01G0170800,OS08G0175300,OS07G0271000,OS04G0271200,OS04G0373000,OS09G0135…
GO:CC	nuclear lumen	GO:0031981	1.8252236197114188e-9	860	308	45	18385	OS04G0488100,OS03G0625900,OS05G0519500,OS02G0497500,OS05G0176000,OS02G0103900,OS03G0352300,OS03G0831100,OS03G0300300,OS06G0498500,OS05G0540100,OS05G0597100,OS02G0146600,OS07G0203300,OS01G0810000,OS02G0134300,OS12G0279000,OS11G0105400,OS07G0615800,OS03G0350100,OS07G0600400,OS11G0615100,OS04G0520000,OS11G0482500,OS07G0435400,OS08G0500500,OS04G0620700,OS09G0551300,OS05G0350500,OS04G0484900,OS03G0737…
GO:CC	nucleolus	GO:0005730	1.82590176301412e-9	328	308	27	18385	OS03G0625900,OS05G0519500,OS05G0176000,OS02G0103900,OS03G0352300,OS03G0831100,OS03G0300300,OS06G0498500,OS05G0540100,OS05G0597100,OS02G0146600,OS07G0203300,OS01G0810000,OS11G0105400,OS07G0615800,OS03G0350100,OS07G0600400,OS11G0615100,OS04G0520000,OS07G0435400,OS04G0620700,OS09G0551300,OS05G0350500,OS02G0728700,OS03G0699200,OS06G0697400,OS01G0276800
GO:CC	intracellular part	GO:0044424	3.775239550662932e-9	11203	308	242	18385	OS01G0949800,OS10G0527400,OS10G0528100,OS11G0664800,OS08G0334900,OS10G0528300,OS10G0527800,OS05G0168800,OS07G0603100,OS04G0566600,OS10G0415300,OS05G0527000,OS04G0488100,OS01G0723600,OS09G0408550,OS02G0293400,OS01G0301700,OS11G0167300,OS05G0580000,OS08G0138700,OS03G0188900,OS06G0358800,OS07G0640000,OS03G0625900,OS08G0399600,OS01G0170800,OS08G0175300,OS04G0271200,OS04G0373000,OS09G0135100,OS02G0582…
GO:CC	nuclear part	GO:0044428	4.1245327175524885e-9	1200	308	54	18385	OS04G0488100,OS03G0625900,OS05G0519500,OS02G0497500,OS05G0176000,OS11G0657300,OS02G0103900,OS03G0352300,OS03G0831100,OS03G0300300,OS06G0498500,OS03G0410900,OS08G0107900,OS05G0540100,OS05G0597100,OS02G0146600,OS07G0203300,OS01G0810000,OS02G0134300,OS12G0279000,OS01G0235400,OS11G0105400,OS07G0615800,OS03G0350100,OS07G0600400,OS11G0615100,OS04G0520000,OS11G0482500,OS07G0435400,OS08G0500500,OS04G0620…
GO:CC	cytosol	GO:0005829	1.9960478748966078e-8	1366	308	57	18385	OS07G0603100,OS07G0640000,OS12G0133050,OS01G0191100,OS06G0168600,OS03G0390000,OS04G0605900,OS04G0518000,OS01G0235400,OS09G0252100,OS03G0748700,OS01G0356500,OS05G0150900,OS09G0326800,OS07G0274800,OS02G0321900,OS02G0131200,OS07G0229900,OS07G0616600,OS03G0402400,OS06G0699900,OS05G0346300,OS08G0530200,OS04G0484900,OS02G0489400,OS02G0287000,OS06G0701200,OS11G0634500,OS02G0497700,OS02G0102700,OS07G0546…
GO:CC	preribosome	GO:0030684	9.544311060812764e-8	94	308	14	18385	OS03G0625900,OS05G0519500,OS05G0176000,OS02G0103900,OS03G0352300,OS07G0203300,OS01G0810000,OS03G0350100,OS07G0600400,OS07G0435400,OS07G0616600,OS05G0346300,OS02G0728700,OS03G0699200
GO:CC	cytosolic part	GO:0044445	3.4216800774034356e-7	304	308	23	18385	OS12G0133050,OS01G0191100,OS06G0168600,OS03G0390000,OS04G0605900,OS09G0326800,OS02G0321900,OS07G0229900,OS07G0616600,OS03G0402400,OS06G0699900,OS05G0346300,OS08G0530200,OS02G0489400,OS02G0287000,OS11G0634500,OS07G0546700,OS08G0156800,OS01G0896700,OS02G0205300,OS12G0406200,OS11G0220800,OS04G0501000
GO:CC	ribosomal subunit	GO:0044391	0.0000012260394275948716	325	308	23	18385	OS02G0102400,OS12G0133050,OS01G0191100,OS03G0390000,OS04G0605900,OS02G0321900,OS07G0229900,OS07G0616600,OS03G0402400,OS05G0346300,OS08G0530200,OS02G0489400,OS02G0287000,OS11G0634500,OS07G0546700,OS05G0243300,OS08G0156800,OS07G0658200,OS01G0896700,OS12G0406200,OS11G0220800,OS04G0501000,OS12G0616200
GO:CC	cytoplasmic part	GO:0044444	0.000005725336519892292	5706	308	141	18385	OS08G0334900,OS05G0168800,OS07G0603100,OS10G0415300,OS01G0723600,OS01G0301700,OS11G0167300,OS05G0580000,OS08G0138700,OS07G0640000,OS08G0399600,OS01G0170800,OS08G0175300,OS04G0271200,OS04G0373000,OS09G0135100,OS02G0102400,OS12G0133050,OS07G0570100,OS08G0559600,OS01G0191100,OS12G0278900,OS12G0128600,OS03G0410900,OS05G0540100,OS03G0718000,OS06G0168600,OS03G0390000,OS08G0535600,OS04G0605900,OS04G0518…
GO:CC	nucleolar part	GO:0044452	0.00000987595695465246	94	308	12	18385	OS05G0519500,OS05G0176000,OS02G0103900,OS03G0352300,OS03G0350100,OS07G0600400,OS11G0615100,OS07G0435400,OS02G0728700,OS03G0699200,OS06G0697400,OS01G0276800
GO:CC	cytosolic ribosome	GO:0022626	0.00001307510141726816	257	308	19	18385	OS12G0133050,OS01G0191100,OS03G0390000,OS04G0605900,OS02G0321900,OS07G0229900,OS07G0616600,OS03G0402400,OS05G0346300,OS08G0530200,OS02G0489400,OS02G0287000,OS11G0634500,OS07G0546700,OS08G0156800,OS01G0896700,OS12G0406200,OS11G0220800,OS04G0501000
GO:CC	small-subunit processome	GO:0032040	0.000015610159287893363	48	308	9	18385	OS03G0625900,OS05G0519500,OS05G0176000,OS02G0103900,OS03G0352300,OS07G0203300,OS01G0810000,OS03G0350100,OS05G0346300
GO:CC	intracellular organelle	GO:0043229	0.000023125402182111775	9376	308	202	18385	OS11G0664800,OS08G0334900,OS05G0168800,OS04G0566600,OS10G0415300,OS05G0527000,OS04G0488100,OS01G0723600,OS02G0293400,OS01G0301700,OS11G0167300,OS05G0580000,OS08G0138700,OS03G0188900,OS06G0358800,OS07G0640000,OS03G0625900,OS08G0399600,OS01G0170800,OS08G0175300,OS04G0271200,OS04G0373000,OS09G0135100,OS02G0102400,OS12G0133050,OS07G0570100,OS05G0519500,OS02G0497500,OS05G0176000,OS01G0182400,OS11G0657…
GO:CC	organelle	GO:0043226	0.000026660201930566647	9390	308	202	18385	OS11G0664800,OS08G0334900,OS05G0168800,OS04G0566600,OS10G0415300,OS05G0527000,OS04G0488100,OS01G0723600,OS02G0293400,OS01G0301700,OS11G0167300,OS05G0580000,OS08G0138700,OS03G0188900,OS06G0358800,OS07G0640000,OS03G0625900,OS08G0399600,OS01G0170800,OS08G0175300,OS04G0271200,OS04G0373000,OS09G0135100,OS02G0102400,OS12G0133050,OS07G0570100,OS05G0519500,OS02G0497500,OS05G0176000,OS01G0182400,OS11G0657…
GO:CC	cell	GO:0005623	0.00003344159379361295	13830	308	268	18385	OS01G0949800,OS10G0527400,OS10G0528100,OS11G0664800,OS02G0291000,OS11G0598500,OS08G0334900,OS10G0528300,OS10G0527800,OS08G0170700,OS05G0168800,OS07G0603100,OS04G0566600,OS04G0534166,OS10G0415300,OS05G0527000,OS04G0488100,OS01G0723600,OS09G0408550,OS09G0267800,OS01G0546400,OS02G0293400,OS01G0301700,OS11G0167300,OS05G0580000,OS08G0138700,OS03G0188900,OS06G0358800,OS07G0640000,OS03G0625900,OS08G0399…
GO:CC	90S preribosome	GO:0030686	0.00003963051789201553	39	308	8	18385	OS05G0519500,OS02G0103900,OS07G0600400,OS07G0435400,OS07G0616600,OS05G0346300,OS02G0728700,OS03G0699200
GO:CC	cell part	GO:0044464	0.00004296820304515479	13779	308	267	18385	OS01G0949800,OS10G0527400,OS10G0528100,OS11G0664800,OS02G0291000,OS11G0598500,OS08G0334900,OS10G0528300,OS10G0527800,OS08G0170700,OS05G0168800,OS07G0603100,OS04G0566600,OS04G0534166,OS10G0415300,OS05G0527000,OS04G0488100,OS01G0723600,OS09G0408550,OS09G0267800,OS01G0546400,OS02G0293400,OS01G0301700,OS11G0167300,OS05G0580000,OS08G0138700,OS03G0188900,OS06G0358800,OS07G0640000,OS03G0625900,OS08G0399…
GO:CC	ribosome	GO:0005840	0.0002824082826414284	473	308	24	18385	OS02G0102400,OS12G0133050,OS01G0191100,OS03G0390000,OS04G0605900,OS11G0105400,OS02G0321900,OS07G0229900,OS07G0616600,OS03G0402400,OS05G0346300,OS08G0530200,OS02G0489400,OS02G0287000,OS11G0634500,OS07G0546700,OS05G0243300,OS08G0156800,OS07G0658200,OS01G0896700,OS12G0406200,OS11G0220800,OS04G0501000,OS12G0616200
GO:CC	small ribosomal subunit	GO:0015935	0.0037978687046089795	138	308	11	18385	OS02G0102400,OS03G0390000,OS07G0229900,OS07G0616600,OS03G0402400,OS05G0346300,OS02G0489400,OS02G0287000,OS11G0634500,OS07G0658200,OS12G0406200
GO:CC	nucleus	GO:0005634	0.006604281396210293	4361	308	104	18385	OS11G0664800,OS04G0566600,OS04G0488100,OS02G0293400,OS03G0188900,OS06G0358800,OS07G0640000,OS03G0625900,OS05G0519500,OS02G0497500,OS05G0176000,OS01G0182400,OS11G0657300,OS01G0962500,OS02G0103900,OS12G0298950,OS03G0352300,OS03G0831100,OS03G0300300,OS06G0498500,OS03G0410900,OS08G0107900,OS05G0540100,OS08G0148600,OS03G0346900,OS05G0597100,OS02G0146600,OS07G0203300,OS01G0810000,OS01G0839500,OS02G0134…
GO:CC	cytosolic small ribosomal subunit	GO:0022627	0.007634763965306813	99	308	9	18385	OS03G0390000,OS07G0229900,OS07G0616600,OS03G0402400,OS05G0346300,OS02G0489400,OS02G0287000,OS11G0634500,OS12G0406200
GO:CC	SMN-Sm protein complex	GO:0034719	0.00811017214538702	5	308	3	18385	OS03G0410900,OS02G0102700,OS07G0608700
GO:CC	membrane-bounded organelle	GO:0043227	0.009670808032640124	8827	308	182	18385	OS11G0664800,OS08G0334900,OS05G0168800,OS04G0566600,OS10G0415300,OS05G0527000,OS04G0488100,OS01G0723600,OS02G0293400,OS01G0301700,OS11G0167300,OS05G0580000,OS08G0138700,OS03G0188900,OS06G0358800,OS07G0640000,OS03G0625900,OS08G0399600,OS01G0170800,OS08G0175300,OS04G0271200,OS04G0373000,OS09G0135100,OS02G0102400,OS07G0570100,OS05G0519500,OS02G0497500,OS05G0176000,OS01G0182400,OS11G0657300,OS01G0962…
GO:CC	large ribosomal subunit	GO:0015934	0.011809808992201163	184	308	12	18385	OS12G0133050,OS01G0191100,OS04G0605900,OS02G0321900,OS08G0530200,OS07G0546700,OS05G0243300,OS08G0156800,OS01G0896700,OS11G0220800,OS04G0501000,OS12G0616200
GO:CC	PeBoW complex	GO:0070545	0.01601881659793945	6	308	3	18385	OS07G0600400,OS07G0435400,OS03G0699200
GO:CC	intracellular membrane-bounded organelle	GO:0043231	0.017048806229424868	8720	308	179	18385	OS11G0664800,OS08G0334900,OS05G0168800,OS04G0566600,OS10G0415300,OS05G0527000,OS04G0488100,OS01G0723600,OS02G0293400,OS01G0301700,OS11G0167300,OS05G0580000,OS03G0188900,OS06G0358800,OS07G0640000,OS03G0625900,OS08G0399600,OS01G0170800,OS08G0175300,OS04G0271200,OS09G0135100,OS02G0102400,OS07G0570100,OS05G0519500,OS02G0497500,OS05G0176000,OS01G0182400,OS11G0657300,OS01G0962500,OS08G0559600,OS02G0103…
GO:CC	cytosolic large ribosomal subunit	GO:0022625	0.02399345448827028	141	308	10	18385	OS12G0133050,OS01G0191100,OS04G0605900,OS02G0321900,OS08G0530200,OS07G0546700,OS08G0156800,OS01G0896700,OS11G0220800,OS04G0501000
KEGG	Ribosome	KEGG:03010	0.00030034113621924506	224	104	20	3410	OS02G0102400,OS12G0133050,OS01G0191100,OS03G0390000,OS04G0605900,OS02G0321900,OS07G0229900,OS07G0616600,OS05G0346300,OS08G0530200,OS02G0489400,OS02G0287000,OS05G0243300,OS08G0156800,OS07G0658200,OS01G0896700,OS12G0406200,OS11G0220800,OS04G0501000,OS12G0616200
KEGG	Ribosome biogenesis in eukaryotes	KEGG:03008	0.013620007294396429	60	104	8	3410	OS05G0519500,OS05G0176000,OS02G0103900,OS03G0352300,OS01G0649000,OS03G0300300,OS03G0350100,OS06G0109400

## Sheet: Pk only
source	term_name	term_id	adjusted_p_value	term_size	query_size	intersection_size	effective_domain_size	intersections
GO:MF	binding	GO:0005488	1.660100706980802e-25	11937	832	405	38866	OS09G0537700,OS09G0538000,OS06G0705350,OS03G0861400,OS09G0252700,OS06G0268500,OS01G0148000,OS01G0842500,OS09G0294000,OS01G0859500,OS09G0474000,OS02G0114033,OS03G0294900,OS07G0618400,OS05G0392050,OS06G0694300,OS01G0956800,OS02G0519900,OS02G0698000,OS03G0412800,OS12G0615600,OS04G0503500,OS07G0671200,OS01G0777300,OS07G0599201,OS11G0625900,OS05G0151000,OS11G0213500,OS02G0518500,OS04G0111100,OS01G0616…
GO:MF	nucleotide binding	GO:0000166	1.0598038353937084e-24	3160	832	165	38866	OS06G0268500,OS09G0294000,OS02G0114033,OS03G0294900,OS07G0618400,OS01G0956800,OS02G0519900,OS02G0698000,OS03G0412800,OS11G0625900,OS04G0111100,OS01G0616900,OS09G0327800,OS11G0211300,OS06G0158900,OS04G0410200,OS09G0121000,OS03G0118400,OS11G0102200,OS07G0669200,OS02G0710500,OS08G0170100,OS01G0816600,OS05G0563100,OS01G0117700,OS05G0143500,OS12G0113500,OS11G0689400,OS01G0227200,OS03G0848700,OS10G0483…
GO:MF	nucleoside phosphate binding	GO:1901265	1.0598038353937084e-24	3160	832	165	38866	OS06G0268500,OS09G0294000,OS02G0114033,OS03G0294900,OS07G0618400,OS01G0956800,OS02G0519900,OS02G0698000,OS03G0412800,OS11G0625900,OS04G0111100,OS01G0616900,OS09G0327800,OS11G0211300,OS06G0158900,OS04G0410200,OS09G0121000,OS03G0118400,OS11G0102200,OS07G0669200,OS02G0710500,OS08G0170100,OS01G0816600,OS05G0563100,OS01G0117700,OS05G0143500,OS12G0113500,OS11G0689400,OS01G0227200,OS03G0848700,OS10G0483…
GO:MF	molecular_function	GO:0003674	6.505774913804882e-24	17727	832	530	38866	OS09G0537700,OS09G0538000,OS06G0705350,OS03G0861400,OS07G0645200,OS09G0252700,OS06G0268500,OS01G0148000,OS01G0842500,OS09G0294000,OS01G0859500,OS09G0474000,OS02G0114033,OS12G0621000,OS05G0426400,OS03G0294900,OS07G0416600,OS09G0478300,OS07G0618400,OS01G0682001,OS05G0392050,OS06G0694300,OS04G0518800,OS01G0956800,OS02G0519900,OS02G0698000,OS03G0412800,OS12G0615600,OS04G0513700,OS04G0503500,OS07G0671…
GO:MF	small molecule binding	GO:0036094	5.810311050736797e-23	3372	832	168	38866	OS06G0268500,OS09G0294000,OS02G0114033,OS03G0294900,OS07G0618400,OS01G0956800,OS02G0519900,OS02G0698000,OS03G0412800,OS11G0625900,OS04G0111100,OS01G0616900,OS09G0327800,OS11G0211300,OS06G0158900,OS04G0410200,OS09G0121000,OS03G0118400,OS11G0102200,OS07G0669200,OS02G0710500,OS08G0170100,OS01G0816600,OS05G0563100,OS01G0117700,OS05G0143500,OS12G0113500,OS11G0689400,OS01G0227200,OS03G0848700,OS10G0483…
GO:MF	ion binding	GO:0043167	7.517362585278335e-23	5769	832	239	38866	OS06G0705350,OS03G0861400,OS06G0268500,OS01G0148000,OS01G0842500,OS02G0114033,OS03G0294900,OS07G0618400,OS05G0392050,OS06G0694300,OS01G0956800,OS02G0519900,OS02G0698000,OS01G0777300,OS11G0625900,OS04G0111100,OS01G0616900,OS09G0327800,OS11G0211300,OS06G0158900,OS04G0410200,OS09G0121000,OS03G0118400,OS11G0102200,OS01G0589900,OS05G0537400,OS04G0170500,OS05G0579300,OS07G0669200,OS02G0710500,OS08G0170…
GO:MF	purine nucleotide binding	GO:0017076	8.185835518649929e-23	2858	832	151	38866	OS06G0268500,OS02G0114033,OS03G0294900,OS07G0618400,OS01G0956800,OS02G0519900,OS02G0698000,OS11G0625900,OS04G0111100,OS01G0616900,OS09G0327800,OS11G0211300,OS06G0158900,OS04G0410200,OS09G0121000,OS03G0118400,OS11G0102200,OS07G0669200,OS02G0710500,OS08G0170100,OS01G0816600,OS05G0563100,OS01G0117700,OS05G0143500,OS12G0113500,OS11G0689400,OS01G0227200,OS03G0848700,OS02G0221300,OS02G0791700,OS02G0153…
GO:MF	anion binding	GO:0043168	1.1248660088634927e-22	3361	832	167	38866	OS06G0268500,OS02G0114033,OS03G0294900,OS07G0618400,OS01G0956800,OS02G0519900,OS02G0698000,OS11G0625900,OS04G0111100,OS01G0616900,OS09G0327800,OS11G0211300,OS06G0158900,OS04G0410200,OS09G0121000,OS03G0118400,OS11G0102200,OS07G0669200,OS02G0710500,OS08G0170100,OS01G0816600,OS05G0563100,OS01G0117700,OS05G0143500,OS12G0113500,OS11G0689400,OS01G0227200,OS03G0848700,OS10G0483500,OS02G0221300,OS02G0791…
GO:MF	purine ribonucleotide binding	GO:0032555	1.793825718422744e-22	2850	832	150	38866	OS06G0268500,OS02G0114033,OS03G0294900,OS07G0618400,OS01G0956800,OS02G0519900,OS02G0698000,OS11G0625900,OS04G0111100,OS01G0616900,OS09G0327800,OS11G0211300,OS06G0158900,OS04G0410200,OS09G0121000,OS03G0118400,OS11G0102200,OS07G0669200,OS02G0710500,OS08G0170100,OS01G0816600,OS05G0563100,OS01G0117700,OS05G0143500,OS12G0113500,OS11G0689400,OS01G0227200,OS03G0848700,OS02G0221300,OS02G0791700,OS02G0153…
GO:MF	ribonucleotide binding	GO:0032553	2.0402403608191287e-22	2884	832	151	38866	OS06G0268500,OS02G0114033,OS03G0294900,OS07G0618400,OS01G0956800,OS02G0519900,OS02G0698000,OS11G0625900,OS04G0111100,OS01G0616900,OS09G0327800,OS11G0211300,OS06G0158900,OS04G0410200,OS09G0121000,OS03G0118400,OS11G0102200,OS07G0669200,OS02G0710500,OS08G0170100,OS01G0816600,OS05G0563100,OS01G0117700,OS05G0143500,OS12G0113500,OS11G0689400,OS01G0227200,OS03G0848700,OS02G0221300,OS02G0791700,OS02G0153…
GO:MF	carbohydrate derivative binding	GO:0097367	4.684592280329768e-22	2908	832	151	38866	OS06G0268500,OS02G0114033,OS03G0294900,OS07G0618400,OS01G0956800,OS02G0519900,OS02G0698000,OS11G0625900,OS04G0111100,OS01G0616900,OS09G0327800,OS11G0211300,OS06G0158900,OS04G0410200,OS09G0121000,OS03G0118400,OS11G0102200,OS07G0669200,OS02G0710500,OS08G0170100,OS01G0816600,OS05G0563100,OS01G0117700,OS05G0143500,OS12G0113500,OS11G0689400,OS01G0227200,OS03G0848700,OS02G0221300,OS02G0791700,OS02G0153…
GO:MF	heterocyclic compound binding	GO:1901363	3.2370928798685947e-19	6801	832	257	38866	OS09G0537700,OS09G0538000,OS06G0268500,OS09G0294000,OS01G0859500,OS09G0474000,OS02G0114033,OS03G0294900,OS07G0618400,OS01G0956800,OS02G0519900,OS02G0698000,OS03G0412800,OS01G0777300,OS11G0625900,OS05G0151000,OS02G0518500,OS04G0111100,OS01G0616900,OS09G0327800,OS11G0211300,OS08G0433400,OS06G0158900,OS04G0410200,OS09G0121000,OS03G0118400,OS11G0102200,OS04G0170500,OS05G0579300,OS01G0946200,OS07G0669…
GO:MF	organic cyclic compound binding	GO:0097159	3.738108848681442e-19	6808	832	257	38866	OS09G0537700,OS09G0538000,OS06G0268500,OS09G0294000,OS01G0859500,OS09G0474000,OS02G0114033,OS03G0294900,OS07G0618400,OS01G0956800,OS02G0519900,OS02G0698000,OS03G0412800,OS01G0777300,OS11G0625900,OS05G0151000,OS02G0518500,OS04G0111100,OS01G0616900,OS09G0327800,OS11G0211300,OS08G0433400,OS06G0158900,OS04G0410200,OS09G0121000,OS03G0118400,OS11G0102200,OS04G0170500,OS05G0579300,OS01G0946200,OS07G0669…
GO:MF	adenyl nucleotide binding	GO:0030554	1.930855668229592e-18	2635	832	134	38866	OS06G0268500,OS02G0114033,OS03G0294900,OS07G0618400,OS01G0956800,OS02G0698000,OS11G0625900,OS04G0111100,OS01G0616900,OS09G0327800,OS11G0211300,OS06G0158900,OS04G0410200,OS09G0121000,OS03G0118400,OS11G0102200,OS02G0710500,OS08G0170100,OS01G0816600,OS01G0117700,OS05G0143500,OS12G0113500,OS11G0689400,OS01G0227200,OS03G0848700,OS02G0221300,OS02G0791700,OS02G0153100,OS01G0260500,OS08G0179000,OS02G0218…
GO:MF	adenyl ribonucleotide binding	GO:0032559	4.205737632471552e-18	2628	832	133	38866	OS06G0268500,OS02G0114033,OS03G0294900,OS07G0618400,OS01G0956800,OS02G0698000,OS11G0625900,OS04G0111100,OS01G0616900,OS09G0327800,OS11G0211300,OS06G0158900,OS04G0410200,OS09G0121000,OS03G0118400,OS11G0102200,OS02G0710500,OS08G0170100,OS01G0816600,OS01G0117700,OS05G0143500,OS12G0113500,OS11G0689400,OS01G0227200,OS03G0848700,OS02G0221300,OS02G0791700,OS02G0153100,OS01G0260500,OS08G0179000,OS02G0218…
GO:MF	purine ribonucleoside triphosphate binding	GO:0035639	2.4391702970610814e-15	2519	832	123	38866	OS02G0114033,OS03G0294900,OS07G0618400,OS02G0519900,OS02G0698000,OS11G0625900,OS01G0616900,OS06G0158900,OS04G0410200,OS09G0121000,OS03G0118400,OS11G0102200,OS07G0669200,OS02G0710500,OS01G0816600,OS05G0563100,OS01G0117700,OS05G0143500,OS12G0113500,OS11G0689400,OS01G0227200,OS02G0221300,OS02G0791700,OS02G0153100,OS08G0179000,OS02G0218400,OS03G0835100,OS03G0178100,OS05G0460600,OS12G0210400,OS05G0164…
GO:MF	ATP binding	GO:0005524	2.4556952916844728e-11	2298	832	106	38866	OS02G0114033,OS03G0294900,OS07G0618400,OS02G0698000,OS11G0625900,OS01G0616900,OS06G0158900,OS04G0410200,OS09G0121000,OS03G0118400,OS11G0102200,OS02G0710500,OS01G0816600,OS01G0117700,OS05G0143500,OS12G0113500,OS11G0689400,OS01G0227200,OS02G0221300,OS02G0791700,OS02G0153100,OS08G0179000,OS02G0218400,OS03G0178100,OS12G0210400,OS05G0164100,OS03G0747900,OS11G0707000,OS07G0537000,OS01G0673600,OS03G0319…
GO:MF	drug binding	GO:0008144	2.0975390906865827e-10	2444	832	108	38866	OS02G0114033,OS03G0294900,OS07G0618400,OS02G0698000,OS11G0625900,OS01G0616900,OS06G0158900,OS04G0410200,OS09G0121000,OS03G0118400,OS11G0102200,OS02G0710500,OS01G0816600,OS01G0117700,OS05G0143500,OS12G0113500,OS11G0689400,OS01G0227200,OS02G0221300,OS02G0791700,OS02G0153100,OS08G0179000,OS02G0218400,OS03G0178100,OS12G0210400,OS05G0164100,OS03G0747900,OS11G0707000,OS07G0537000,OS01G0673600,OS03G0319…
GO:MF	transferase activity, transferring phosphorus-containing groups	GO:0016772	0.0000021365421266503603	1864	832	79	38866	OS09G0294000,OS07G0618400,OS02G0698000,OS11G0625900,OS05G0151000,OS04G0410200,OS03G0118400,OS11G0102200,OS02G0710500,OS09G0345300,OS01G0816600,OS01G0117700,OS05G0143500,OS03G0850400,OS12G0113500,OS01G0227200,OS06G0634100,OS02G0791700,OS02G0153100,OS08G0179000,OS02G0218400,OS12G0210400,OS02G0736200,OS05G0164100,OS07G0537000,OS03G0319400,OS03G0339900,OS11G0171800,OS11G0216300,OS04G0616500,OS03G0735…
GO:MF	ADP binding	GO:0043531	0.000005431739328387239	333	832	26	38866	OS06G0268500,OS01G0956800,OS04G0111100,OS09G0327800,OS11G0211300,OS08G0170100,OS03G0848700,OS01G0260500,OS12G0131701,OS08G0174800,OS04G0621500,OS09G0272900,OS06G0287700,OS10G0163040,OS05G0414200,OS06G0619000,OS06G0693100,OS11G0684700,OS06G0267900,OS11G0588600,OS11G0265900,OS12G0270300,OS07G0481300,OS01G0180600,OS10G0183000,OS05G0365300
GO:MF	kinase activity	GO:0016301	0.000007112392193691543	1683	832	72	38866	OS09G0294000,OS07G0618400,OS02G0698000,OS11G0625900,OS04G0410200,OS03G0118400,OS11G0102200,OS02G0710500,OS09G0345300,OS01G0816600,OS01G0117700,OS05G0143500,OS03G0850400,OS12G0113500,OS01G0227200,OS02G0791700,OS02G0153100,OS08G0179000,OS02G0218400,OS12G0210400,OS05G0164100,OS07G0537000,OS03G0319400,OS03G0339900,OS11G0171800,OS11G0216300,OS04G0616500,OS02G0141300,OS01G0536000,OS03G0170400,OS03G0701…
GO:MF	catalytic activity	GO:0003824	0.000008475467948415302	9355	832	269	38866	OS09G0537700,OS09G0538000,OS09G0252700,OS01G0148000,OS01G0842500,OS09G0294000,OS02G0114033,OS12G0621000,OS05G0426400,OS03G0294900,OS07G0416600,OS09G0478300,OS07G0618400,OS01G0682001,OS05G0392050,OS04G0518800,OS02G0519900,OS02G0698000,OS03G0412800,OS04G0513700,OS04G0503500,OS01G0777300,OS11G0625900,OS05G0151000,OS01G0616900,OS07G0539300,OS04G0174900,OS04G0498600,OS07G0484800,OS06G0158900,OS04G0410…
GO:MF	protein binding	GO:0005515	0.00005962286496059946	4429	832	144	38866	OS06G0705350,OS09G0252700,OS01G0859500,OS07G0618400,OS06G0694300,OS12G0615600,OS04G0503500,OS07G0671200,OS07G0599201,OS11G0625900,OS11G0213500,OS01G0616900,OS02G0663300,OS11G0211300,OS12G0482500,OS08G0494350,OS01G0891601,OS07G0101200,OS01G0589900,OS09G0345300,OS04G0220501,OS05G0257100,OS11G0118500,OS05G0307200,OS05G0132000,OS02G0170000,OS06G0587900,OS04G0463800,OS02G0153100,OS01G0260500,OS02G0672…
GO:MF	catalytic activity, acting on a protein	GO:0140096	0.00008995136215539833	2903	832	103	38866	OS09G0252700,OS01G0148000,OS12G0621000,OS07G0618400,OS05G0392050,OS04G0503500,OS11G0625900,OS04G0410200,OS03G0118400,OS11G0102200,OS05G0537400,OS02G0710500,OS09G0345300,OS01G0816600,OS01G0117700,OS01G0642000,OS05G0143500,OS01G0558850,OS12G0113500,OS01G0227200,OS03G0192500,OS02G0791700,OS02G0153100,OS02G0326700,OS08G0179000,OS02G0218400,OS01G0795000,OS04G0543700,OS12G0210400,OS07G0537000,OS01G0673…
GO:MF	phosphotransferase activity, alcohol group as acceptor	GO:0016773	0.00011529837154721891	1538	832	64	38866	OS07G0618400,OS02G0698000,OS11G0625900,OS04G0410200,OS03G0118400,OS11G0102200,OS02G0710500,OS09G0345300,OS01G0816600,OS01G0117700,OS05G0143500,OS12G0113500,OS01G0227200,OS02G0791700,OS02G0153100,OS08G0179000,OS02G0218400,OS12G0210400,OS05G0164100,OS07G0537000,OS03G0319400,OS03G0339900,OS11G0171800,OS11G0216300,OS04G0616500,OS02G0141300,OS01G0536000,OS03G0170400,OS03G0701800,OS05G0256500,OS02G0819…
GO:MF	ion transmembrane transporter activity, phosphorylative mechanism	GO:0015662	0.00013436861381446198	34	832	8	38866	OS03G0178100,OS04G0605500,OS02G0701700,OS02G0825600,OS11G0140400,OS12G0638700,OS03G0616400,OS04G0656100
GO:MF	hydrolase activity	GO:0016787	0.0005004131699620528	2977	832	102	38866	OS09G0537700,OS09G0538000,OS02G0114033,OS12G0621000,OS04G0518800,OS02G0519900,OS04G0513700,OS01G0777300,OS07G0539300,OS04G0174900,OS06G0158900,OS10G0565200,OS05G0537400,OS07G0669200,OS05G0563100,OS01G0642000,OS01G0558850,OS03G0254400,OS01G0299300,OS03G0192500,OS02G0326700,OS11G0683500,OS11G0131900,OS03G0835100,OS01G0795000,OS05G0460600,OS04G0543700,OS01G0101200,OS05G0164100,OS03G0747900,OS07G0659…
GO:MF	GTP binding	GO:0005525	0.0006937313254748519	228	832	18	38866	OS02G0519900,OS07G0669200,OS05G0563100,OS03G0835100,OS05G0460600,OS05G0575300,OS06G0111400,OS05G0390100,OS10G0548800,OS08G0457600,OS11G0592700,OS05G0357600,OS01G0847200,OS11G0153700,OS06G0671900,OS01G0575000,OS11G0586900,OS04G0662700
GO:MF	guanyl ribonucleotide binding	GO:0032561	0.0007381094949404982	229	832	18	38866	OS02G0519900,OS07G0669200,OS05G0563100,OS03G0835100,OS05G0460600,OS05G0575300,OS06G0111400,OS05G0390100,OS10G0548800,OS08G0457600,OS11G0592700,OS05G0357600,OS01G0847200,OS11G0153700,OS06G0671900,OS01G0575000,OS11G0586900,OS04G0662700
GO:MF	purine ribonucleoside binding	GO:0032550	0.0007381094949404982	229	832	18	38866	OS02G0519900,OS07G0669200,OS05G0563100,OS03G0835100,OS05G0460600,OS05G0575300,OS06G0111400,OS05G0390100,OS10G0548800,OS08G0457600,OS11G0592700,OS05G0357600,OS01G0847200,OS11G0153700,OS06G0671900,OS01G0575000,OS11G0586900,OS04G0662700
GO:MF	purine nucleoside binding	GO:0001883	0.0007381094949404982	229	832	18	38866	OS02G0519900,OS07G0669200,OS05G0563100,OS03G0835100,OS05G0460600,OS05G0575300,OS06G0111400,OS05G0390100,OS10G0548800,OS08G0457600,OS11G0592700,OS05G0357600,OS01G0847200,OS11G0153700,OS06G0671900,OS01G0575000,OS11G0586900,OS04G0662700
GO:MF	guanyl nucleotide binding	GO:0019001	0.0007381094949404982	229	832	18	38866	OS02G0519900,OS07G0669200,OS05G0563100,OS03G0835100,OS05G0460600,OS05G0575300,OS06G0111400,OS05G0390100,OS10G0548800,OS08G0457600,OS11G0592700,OS05G0357600,OS01G0847200,OS11G0153700,OS06G0671900,OS01G0575000,OS11G0586900,OS04G0662700
GO:MF	metal ion transmembrane transporter activity	GO:0046873	0.0007852840461659203	164	832	15	38866	OS06G0671000,OS01G0503400,OS04G0613900,OS03G0178100,OS07G0679000,OS08G0100200,OS01G0935500,OS04G0605500,OS07G0669700,OS02G0825600,OS03G0684400,OS01G0678500,OS11G0140400,OS03G0616400,OS06G0690700
GO:MF	ribonucleoside binding	GO:0032549	0.0010008971899582394	234	832	18	38866	OS02G0519900,OS07G0669200,OS05G0563100,OS03G0835100,OS05G0460600,OS05G0575300,OS06G0111400,OS05G0390100,OS10G0548800,OS08G0457600,OS11G0592700,OS05G0357600,OS01G0847200,OS11G0153700,OS06G0671900,OS01G0575000,OS11G0586900,OS04G0662700
GO:MF	ATPase-coupled cation transmembrane transporter activity	GO:0019829	0.001000934190490214	73	832	10	38866	OS03G0178100,OS04G0605500,OS02G0701700,OS02G0825600,OS02G0196600,OS11G0140400,OS12G0638700,OS03G0616400,OS04G0656100,OS06G0690700
GO:MF	ATPase-coupled ion transmembrane transporter activity	GO:0042625	0.001000934190490214	73	832	10	38866	OS03G0178100,OS04G0605500,OS02G0701700,OS02G0825600,OS02G0196600,OS11G0140400,OS12G0638700,OS03G0616400,OS04G0656100,OS06G0690700
GO:MF	nucleoside binding	GO:0001882	0.0010626184925640548	235	832	18	38866	OS02G0519900,OS07G0669200,OS05G0563100,OS03G0835100,OS05G0460600,OS05G0575300,OS06G0111400,OS05G0390100,OS10G0548800,OS08G0457600,OS11G0592700,OS05G0357600,OS01G0847200,OS11G0153700,OS06G0671900,OS01G0575000,OS11G0586900,OS04G0662700
GO:MF	nucleic acid binding	GO:0003676	0.002472707860596047	3205	832	105	38866	OS09G0537700,OS09G0538000,OS01G0859500,OS09G0474000,OS02G0519900,OS01G0777300,OS05G0151000,OS02G0518500,OS08G0433400,OS04G0170500,OS05G0579300,OS01G0946200,OS07G0119300,OS11G0689400,OS09G0497900,OS02G0221300,OS02G0672200,OS02G0598400,OS08G0360300,OS04G0629600,OS09G0477900,OS04G0541700,OS02G0736200,OS02G0831600,OS07G0227600,OS12G0572400,OS03G0251350,OS01G0841800,OS05G0575300,OS03G0253500,OS08G0157…
GO:MF	ion transmembrane transporter activity	GO:0015075	0.007658402317701954	671	832	32	38866	OS04G0491350,OS06G0671000,OS02G0117500,OS02G0191300,OS01G0503400,OS04G0613900,OS12G0194900,OS03G0178100,OS07G0679000,OS08G0100200,OS01G0935500,OS04G0605500,OS02G0701700,OS07G0669700,OS01G0266800,OS01G0870300,OS02G0825600,OS06G0633800,OS10G0567000,OS04G0491700,OS02G0196600,OS03G0684400,OS01G0678500,OS11G0140400,OS12G0638700,OS03G0616400,OS07G0603800,OS04G0656100,OS09G0570400,OS04G0652400,OS12G0617…
GO:MF	transferase activity	GO:0016740	0.008499424347486602	4011	832	123	38866	OS09G0252700,OS01G0148000,OS09G0294000,OS05G0426400,OS09G0478300,OS07G0618400,OS05G0392050,OS02G0698000,OS04G0503500,OS11G0625900,OS05G0151000,OS07G0484800,OS04G0410200,OS03G0118400,OS11G0102200,OS05G0290300,OS02G0710500,OS09G0345300,OS06G0167400,OS01G0816600,OS01G0117700,OS05G0143500,OS03G0850400,OS12G0113500,OS01G0299300,OS01G0227200,OS06G0634100,OS02G0791700,OS02G0153100,OS11G0683500,OS08G0179…
GO:MF	protein tyrosine/serine/threonine phosphatase activity	GO:0008138	0.008575719721983673	18	832	5	38866	OS05G0524200,OS08G0379300,OS12G0152800,OS10G0561900,OS01G0390900
GO:MF	inorganic cation transmembrane transporter activity	GO:0022890	0.012241777561980648	418	832	23	38866	OS04G0491350,OS06G0671000,OS01G0503400,OS04G0613900,OS03G0178100,OS07G0679000,OS08G0100200,OS01G0935500,OS04G0605500,OS02G0701700,OS07G0669700,OS02G0825600,OS04G0491700,OS02G0196600,OS03G0684400,OS01G0678500,OS11G0140400,OS12G0638700,OS03G0616400,OS07G0603800,OS04G0656100,OS12G0617800,OS06G0690700
GO:MF	inorganic molecular entity transmembrane transporter activity	GO:0015318	0.014675691793980804	663	832	31	38866	OS04G0491350,OS06G0671000,OS02G0117500,OS02G0191300,OS01G0503400,OS04G0613900,OS12G0194900,OS03G0178100,OS07G0679000,OS08G0100200,OS01G0935500,OS04G0605500,OS02G0701700,OS07G0669700,OS01G0266800,OS02G0825600,OS06G0633800,OS10G0567000,OS04G0491700,OS02G0196600,OS03G0684400,OS01G0678500,OS11G0140400,OS12G0638700,OS03G0616400,OS07G0603800,OS04G0656100,OS09G0570400,OS04G0652400,OS12G0617800,OS06G0690…
GO:MF	transporter activity	GO:0005215	0.015596944762339934	1262	832	49	38866	OS03G0638200,OS10G0210500,OS04G0491350,OS06G0158900,OS03G0858800,OS03G0823500,OS06G0671000,OS02G0117500,OS02G0191300,OS11G0508600,OS01G0503400,OS04G0613900,OS08G0156600,OS12G0194900,OS03G0178100,OS07G0679000,OS11G0518900,OS08G0100200,OS01G0935500,OS03G0823200,OS04G0605500,OS02G0701700,OS07G0669700,OS01G0266800,OS01G0870300,OS02G0825600,OS01G0723800,OS01G0321300,OS06G0633800,OS01G0881300,OS10G0567…
GO:MF	cation transmembrane transporter activity	GO:0008324	0.018130811064016664	458	832	24	38866	OS04G0491350,OS06G0671000,OS01G0503400,OS04G0613900,OS03G0178100,OS07G0679000,OS08G0100200,OS01G0935500,OS04G0605500,OS02G0701700,OS07G0669700,OS01G0870300,OS02G0825600,OS04G0491700,OS02G0196600,OS03G0684400,OS01G0678500,OS11G0140400,OS12G0638700,OS03G0616400,OS07G0603800,OS04G0656100,OS12G0617800,OS06G0690700
GO:MF	cation binding	GO:0043169	0.019325864102926818	2749	832	89	38866	OS06G0705350,OS03G0861400,OS01G0148000,OS01G0842500,OS05G0392050,OS06G0694300,OS01G0777300,OS01G0589900,OS05G0537400,OS04G0170500,OS05G0579300,OS07G0669200,OS07G0658400,OS01G0558850,OS02G0258900,OS03G0371300,OS03G0192500,OS09G0485201,OS12G0421000,OS03G0178100,OS10G0567400,OS05G0460600,OS06G0704800,OS04G0629600,OS01G0101200,OS08G0326300,OS03G0371350,OS11G0106700,OS12G0596800,OS07G0691200,OS11G0525…
GO:MF	metal ion binding	GO:0046872	0.023515399527378838	2726	832	88	38866	OS06G0705350,OS03G0861400,OS01G0148000,OS01G0842500,OS05G0392050,OS06G0694300,OS01G0777300,OS01G0589900,OS04G0170500,OS05G0579300,OS07G0669200,OS07G0658400,OS01G0558850,OS02G0258900,OS03G0371300,OS03G0192500,OS09G0485201,OS12G0421000,OS03G0178100,OS10G0567400,OS05G0460600,OS06G0704800,OS04G0629600,OS01G0101200,OS08G0326300,OS03G0371350,OS11G0106700,OS12G0596800,OS07G0691200,OS11G0525600,OS03G0655…
GO:MF	protein kinase activity	GO:0004672	0.028012845917811315	1399	832	52	38866	OS07G0618400,OS11G0625900,OS04G0410200,OS03G0118400,OS11G0102200,OS02G0710500,OS09G0345300,OS01G0816600,OS01G0117700,OS05G0143500,OS12G0113500,OS01G0227200,OS02G0791700,OS02G0153100,OS08G0179000,OS02G0218400,OS12G0210400,OS07G0537000,OS03G0319400,OS03G0339900,OS11G0171800,OS11G0216300,OS04G0616500,OS01G0536000,OS03G0170400,OS05G0256500,OS02G0819600,OS02G0591900,OS01G0960400,OS03G0268200,OS09G0478…
GO:BP	biological_process	GO:0008150	7.161615839566987e-15	15028	832	442	38866	OS09G0537700,OS09G0538000,OS06G0705350,OS01G0164900,OS03G0861400,OS07G0645200,OS09G0252700,OS01G0148000,OS05G0163250,OS01G0842500,OS09G0294000,OS03G0816900,OS01G0859500,OS09G0474000,OS02G0114033,OS12G0621000,OS05G0255800,OS03G0294900,OS07G0416600,OS09G0478300,OS07G0618400,OS01G0682001,OS05G0392050,OS06G0694300,OS03G0788250,OS04G0518800,OS02G0519900,OS02G0698000,OS03G0412800,OS04G0513700,OS04G0503…
GO:BP	cellular process	GO:0009987	2.3693280502106875e-13	11230	832	349	38866	OS09G0537700,OS09G0538000,OS06G0705350,OS01G0164900,OS07G0645200,OS09G0252700,OS01G0148000,OS05G0163250,OS01G0842500,OS09G0294000,OS03G0816900,OS01G0859500,OS09G0474000,OS02G0114033,OS12G0621000,OS05G0255800,OS03G0294900,OS07G0416600,OS09G0478300,OS07G0618400,OS01G0682001,OS05G0392050,OS06G0694300,OS03G0788250,OS04G0518800,OS02G0519900,OS02G0698000,OS03G0412800,OS04G0503500,OS01G0777300,OS11G0625…
GO:BP	organic substance metabolic process	GO:0071704	3.1049256195291023e-13	9664	832	311	38866	OS09G0537700,OS09G0538000,OS06G0705350,OS01G0164900,OS07G0645200,OS09G0252700,OS01G0148000,OS05G0163250,OS01G0842500,OS09G0294000,OS01G0859500,OS09G0474000,OS02G0114033,OS12G0621000,OS03G0294900,OS07G0416600,OS09G0478300,OS07G0618400,OS01G0682001,OS05G0392050,OS06G0694300,OS04G0518800,OS02G0519900,OS02G0698000,OS03G0412800,OS04G0513700,OS04G0503500,OS01G0777300,OS11G0625900,OS05G0151000,OS08G0223…
GO:BP	primary metabolic process	GO:0044238	4.613186909132758e-11	9107	832	289	38866	OS09G0537700,OS09G0538000,OS06G0705350,OS01G0164900,OS07G0645200,OS09G0252700,OS01G0148000,OS05G0163250,OS09G0294000,OS01G0859500,OS09G0474000,OS02G0114033,OS12G0621000,OS03G0294900,OS07G0416600,OS09G0478300,OS07G0618400,OS01G0682001,OS05G0392050,OS06G0694300,OS02G0519900,OS02G0698000,OS03G0412800,OS04G0513700,OS04G0503500,OS01G0777300,OS11G0625900,OS05G0151000,OS08G0223700,OS11G0213500,OS02G0518…
GO:BP	nitrogen compound metabolic process	GO:0006807	4.716228077610019e-11	7933	832	260	38866	OS09G0537700,OS09G0538000,OS06G0705350,OS01G0164900,OS07G0645200,OS09G0252700,OS01G0148000,OS05G0163250,OS09G0294000,OS01G0859500,OS09G0474000,OS02G0114033,OS12G0621000,OS03G0294900,OS07G0416600,OS07G0618400,OS01G0682001,OS05G0392050,OS06G0694300,OS04G0518800,OS02G0519900,OS04G0503500,OS01G0777300,OS11G0625900,OS05G0151000,OS08G0223700,OS11G0213500,OS02G0518500,OS05G0390800,OS03G0243200,OS01G0616…
GO:BP	cellular metabolic process	GO:0044237	4.983262717316307e-11	9318	832	294	38866	OS09G0537700,OS09G0538000,OS06G0705350,OS01G0164900,OS07G0645200,OS09G0252700,OS01G0148000,OS05G0163250,OS01G0842500,OS09G0294000,OS01G0859500,OS09G0474000,OS02G0114033,OS12G0621000,OS03G0294900,OS07G0416600,OS09G0478300,OS07G0618400,OS01G0682001,OS05G0392050,OS06G0694300,OS04G0518800,OS02G0519900,OS02G0698000,OS03G0412800,OS04G0503500,OS01G0777300,OS11G0625900,OS05G0151000,OS08G0223700,OS11G0213…
GO:BP	metabolic process	GO:0008152	3.043680363389913e-9	11320	832	334	38866	OS09G0537700,OS09G0538000,OS06G0705350,OS01G0164900,OS07G0645200,OS09G0252700,OS01G0148000,OS05G0163250,OS01G0842500,OS09G0294000,OS01G0859500,OS09G0474000,OS02G0114033,OS12G0621000,OS03G0294900,OS07G0416600,OS09G0478300,OS07G0618400,OS01G0682001,OS05G0392050,OS06G0694300,OS04G0518800,OS02G0519900,OS02G0698000,OS03G0412800,OS04G0513700,OS04G0503500,OS01G0777300,OS11G0625900,OS05G0151000,OS08G0223…
GO:BP	macromolecule metabolic process	GO:0043170	3.420070526664931e-8	7436	832	236	38866	OS09G0537700,OS09G0538000,OS06G0705350,OS01G0164900,OS07G0645200,OS09G0252700,OS01G0148000,OS05G0163250,OS01G0859500,OS09G0474000,OS02G0114033,OS12G0621000,OS03G0294900,OS09G0478300,OS07G0618400,OS05G0392050,OS06G0694300,OS02G0519900,OS04G0503500,OS01G0777300,OS11G0625900,OS05G0151000,OS08G0223700,OS11G0213500,OS02G0518500,OS05G0390800,OS03G0243200,OS08G0223766,OS02G0101600,OS08G0494350,OS04G0410…
GO:BP	phosphate-containing compound metabolic process	GO:0006796	9.297221513941206e-8	2493	832	103	38866	OS09G0294000,OS07G0416600,OS07G0618400,OS02G0698000,OS03G0412800,OS11G0625900,OS01G0616900,OS04G0410200,OS03G0118400,OS11G0102200,OS05G0537400,OS05G0290300,OS02G0710500,OS09G0345300,OS01G0816600,OS01G0117700,OS05G0143500,OS03G0850400,OS12G0113500,OS01G0299300,OS01G0227200,OS02G0258900,OS03G0192500,OS02G0791700,OS02G0153100,OS08G0179000,OS02G0218400,OS12G0210400,OS01G0101200,OS05G0164100,OS07G0537…
GO:BP	heterocycle metabolic process	GO:0046483	1.687468434844209e-7	3651	832	135	38866	OS09G0537700,OS09G0538000,OS06G0705350,OS01G0164900,OS07G0645200,OS05G0163250,OS01G0859500,OS09G0474000,OS02G0114033,OS07G0416600,OS06G0694300,OS04G0518800,OS01G0777300,OS05G0151000,OS08G0223700,OS11G0213500,OS02G0518500,OS05G0390800,OS03G0243200,OS01G0616900,OS04G0498600,OS08G0223766,OS07G0484800,OS08G0494350,OS09G0121000,OS01G0589900,OS01G0946200,OS01G0188200,OS05G0307200,OS09G0497900,OS02G0258…
GO:BP	phosphorus metabolic process	GO:0006793	1.7631025969708512e-7	2522	832	103	38866	OS09G0294000,OS07G0416600,OS07G0618400,OS02G0698000,OS03G0412800,OS11G0625900,OS01G0616900,OS04G0410200,OS03G0118400,OS11G0102200,OS05G0537400,OS05G0290300,OS02G0710500,OS09G0345300,OS01G0816600,OS01G0117700,OS05G0143500,OS03G0850400,OS12G0113500,OS01G0299300,OS01G0227200,OS02G0258900,OS03G0192500,OS02G0791700,OS02G0153100,OS08G0179000,OS02G0218400,OS12G0210400,OS01G0101200,OS05G0164100,OS07G0537…
GO:BP	phosphorylation	GO:0016310	4.499502892460193e-7	1827	832	81	38866	OS09G0294000,OS07G0618400,OS02G0698000,OS11G0625900,OS04G0410200,OS03G0118400,OS11G0102200,OS02G0710500,OS09G0345300,OS01G0816600,OS01G0117700,OS05G0143500,OS03G0850400,OS12G0113500,OS01G0227200,OS02G0791700,OS02G0153100,OS08G0179000,OS02G0218400,OS12G0210400,OS05G0164100,OS07G0537000,OS03G0319400,OS03G0339900,OS09G0423300,OS06G0256500,OS11G0171800,OS11G0216300,OS04G0616500,OS02G0141300,OS01G0536…
GO:BP	cellular macromolecule metabolic process	GO:0044260	0.0000018511476680171616	6058	832	194	38866	OS09G0537700,OS09G0538000,OS01G0164900,OS07G0645200,OS09G0252700,OS01G0148000,OS01G0859500,OS09G0474000,OS02G0114033,OS12G0621000,OS03G0294900,OS09G0478300,OS07G0618400,OS05G0392050,OS02G0519900,OS04G0503500,OS01G0777300,OS11G0625900,OS05G0151000,OS08G0223700,OS02G0518500,OS05G0390800,OS08G0223766,OS02G0101600,OS04G0410200,OS09G0121000,OS03G0118400,OS11G0102200,OS05G0537400,OS01G0946200,OS05G0290…
GO:BP	cellular aromatic compound metabolic process	GO:0006725	0.000002125411531175256	3761	832	134	38866	OS09G0537700,OS09G0538000,OS06G0705350,OS01G0164900,OS07G0645200,OS05G0163250,OS01G0842500,OS01G0859500,OS09G0474000,OS02G0114033,OS07G0416600,OS06G0694300,OS04G0518800,OS01G0777300,OS05G0151000,OS08G0223700,OS11G0213500,OS02G0518500,OS05G0390800,OS03G0243200,OS01G0616900,OS04G0498600,OS08G0223766,OS07G0484800,OS08G0494350,OS09G0121000,OS01G0589900,OS01G0946200,OS01G0188200,OS05G0307200,OS09G0497…
GO:BP	macromolecule modification	GO:0043412	0.0000027904808176905754	3227	832	119	38866	OS06G0705350,OS07G0645200,OS09G0252700,OS01G0148000,OS12G0621000,OS03G0294900,OS07G0618400,OS05G0392050,OS06G0694300,OS04G0503500,OS11G0625900,OS11G0213500,OS08G0494350,OS04G0410200,OS03G0118400,OS11G0102200,OS01G0589900,OS05G0537400,OS05G0290300,OS02G0710500,OS09G0345300,OS01G0816600,OS01G0117700,OS05G0143500,OS05G0307200,OS12G0113500,OS01G0227200,OS06G0634100,OS03G0192500,OS02G0791700,OS04G0463…
GO:BP	organic cyclic compound metabolic process	GO:1901360	0.0000043371450796560415	3842	832	135	38866	OS09G0537700,OS09G0538000,OS06G0705350,OS01G0164900,OS07G0645200,OS05G0163250,OS01G0842500,OS01G0859500,OS09G0474000,OS02G0114033,OS07G0416600,OS06G0694300,OS01G0777300,OS05G0151000,OS08G0223700,OS11G0213500,OS02G0518500,OS05G0390800,OS03G0243200,OS01G0616900,OS04G0498600,OS08G0223766,OS07G0484800,OS08G0494350,OS09G0121000,OS01G0589900,OS01G0946200,OS01G0188200,OS05G0307200,OS09G0497900,OS02G0258…
GO:BP	organonitrogen compound metabolic process	GO:1901564	0.000007957937093365448	5183	832	169	38866	OS07G0645200,OS09G0252700,OS01G0148000,OS09G0294000,OS12G0621000,OS03G0294900,OS07G0416600,OS07G0618400,OS01G0682001,OS05G0392050,OS04G0518800,OS02G0519900,OS04G0503500,OS11G0625900,OS01G0616900,OS04G0498600,OS07G0484800,OS02G0101600,OS04G0410200,OS03G0118400,OS11G0102200,OS05G0537400,OS05G0290300,OS02G0710500,OS09G0345300,OS01G0816600,OS01G0117700,OS07G0658400,OS05G0143500,OS01G0558850,OS03G0850…
GO:BP	nucleobase-containing compound metabolic process	GO:0006139	0.000013868359879230244	3431	832	122	38866	OS09G0537700,OS09G0538000,OS06G0705350,OS01G0164900,OS07G0645200,OS05G0163250,OS01G0859500,OS09G0474000,OS02G0114033,OS07G0416600,OS06G0694300,OS01G0777300,OS05G0151000,OS08G0223700,OS11G0213500,OS02G0518500,OS05G0390800,OS03G0243200,OS01G0616900,OS04G0498600,OS08G0223766,OS07G0484800,OS08G0494350,OS09G0121000,OS01G0589900,OS01G0946200,OS01G0188200,OS05G0307200,OS09G0497900,OS06G0634100,OS04G0463…
GO:BP	cellular nitrogen compound metabolic process	GO:0034641	0.00002697351701190303	4265	832	143	38866	OS09G0537700,OS09G0538000,OS06G0705350,OS01G0164900,OS07G0645200,OS05G0163250,OS01G0859500,OS09G0474000,OS02G0114033,OS07G0416600,OS06G0694300,OS02G0519900,OS01G0777300,OS05G0151000,OS08G0223700,OS11G0213500,OS02G0518500,OS05G0390800,OS03G0243200,OS01G0616900,OS04G0498600,OS08G0223766,OS07G0484800,OS08G0494350,OS09G0121000,OS01G0589900,OS01G0946200,OS01G0188200,OS05G0307200,OS09G0497900,OS06G0634…
GO:BP	protein modification process	GO:0036211	0.000031784195484051634	2822	832	104	38866	OS07G0645200,OS09G0252700,OS01G0148000,OS12G0621000,OS03G0294900,OS07G0618400,OS05G0392050,OS04G0503500,OS11G0625900,OS04G0410200,OS03G0118400,OS11G0102200,OS05G0537400,OS05G0290300,OS02G0710500,OS09G0345300,OS01G0816600,OS01G0117700,OS05G0143500,OS12G0113500,OS01G0227200,OS03G0192500,OS02G0791700,OS02G0153100,OS08G0179000,OS02G0218400,OS06G0704800,OS12G0210400,OS07G0537000,OS01G0673600,OS03G0319…
GO:BP	cellular protein modification process	GO:0006464	0.000031784195484051634	2822	832	104	38866	OS07G0645200,OS09G0252700,OS01G0148000,OS12G0621000,OS03G0294900,OS07G0618400,OS05G0392050,OS04G0503500,OS11G0625900,OS04G0410200,OS03G0118400,OS11G0102200,OS05G0537400,OS05G0290300,OS02G0710500,OS09G0345300,OS01G0816600,OS01G0117700,OS05G0143500,OS12G0113500,OS01G0227200,OS03G0192500,OS02G0791700,OS02G0153100,OS08G0179000,OS02G0218400,OS06G0704800,OS12G0210400,OS07G0537000,OS01G0673600,OS03G0319…
GO:BP	metal ion transport	GO:0030001	0.00006621977313138812	267	832	22	38866	OS03G0861400,OS06G0671000,OS01G0503400,OS04G0613900,OS12G0421000,OS03G0178100,OS07G0679000,OS11G0106700,OS08G0100200,OS01G0935500,OS04G0444800,OS04G0605500,OS07G0669700,OS02G0825600,OS10G0506100,OS02G0196600,OS03G0684400,OS01G0678500,OS11G0140400,OS03G0616400,OS12G0617800,OS06G0690700
GO:BP	nucleic acid metabolic process	GO:0090304	0.0007716220865977768	3093	832	106	38866	OS09G0537700,OS09G0538000,OS06G0705350,OS01G0164900,OS07G0645200,OS05G0163250,OS01G0859500,OS09G0474000,OS02G0114033,OS06G0694300,OS01G0777300,OS05G0151000,OS08G0223700,OS11G0213500,OS02G0518500,OS05G0390800,OS03G0243200,OS08G0223766,OS08G0494350,OS09G0121000,OS01G0589900,OS01G0946200,OS01G0188200,OS05G0307200,OS09G0497900,OS06G0634100,OS04G0463800,OS06G0523900,OS02G0598400,OS08G0360300,OS01G0600…
GO:BP	biological regulation	GO:0065007	0.0018232057431124458	4312	832	136	38866	OS07G0645200,OS01G0859500,OS09G0474000,OS02G0114033,OS07G0618400,OS05G0392050,OS04G0518800,OS08G0223700,OS02G0518500,OS05G0390800,OS08G0223766,OS03G0418700,OS11G0102200,OS01G0946200,OS03G0858800,OS07G0658400,OS05G0143500,OS09G0428600,OS12G0113500,OS09G0497900,OS02G0117500,OS01G0227200,OS06G0634100,OS10G0483500,OS02G0791700,OS01G0503400,OS02G0672200,OS02G0598400,OS08G0360300,OS09G0546900,OS06G0704…
GO:BP	protein metabolic process	GO:0019538	0.002578885777752885	4262	832	134	38866	OS07G0645200,OS09G0252700,OS01G0148000,OS12G0621000,OS03G0294900,OS07G0618400,OS05G0392050,OS02G0519900,OS04G0503500,OS11G0625900,OS02G0101600,OS04G0410200,OS03G0118400,OS11G0102200,OS05G0537400,OS05G0290300,OS02G0710500,OS09G0345300,OS01G0816600,OS01G0117700,OS05G0143500,OS01G0558850,OS12G0113500,OS01G0227200,OS02G0258900,OS03G0192500,OS02G0791700,OS02G0153100,OS02G0326700,OS08G0179000,OS02G0218…
GO:BP	heterocycle biosynthetic process	GO:0018130	0.002582086771739388	2066	832	76	38866	OS07G0645200,OS01G0859500,OS09G0474000,OS02G0114033,OS05G0151000,OS08G0223700,OS02G0518500,OS05G0390800,OS01G0616900,OS04G0498600,OS08G0223766,OS07G0484800,OS01G0946200,OS09G0497900,OS02G0258900,OS06G0634100,OS03G0323200,OS08G0360300,OS10G0502400,OS10G0567400,OS05G0460600,OS06G0704800,OS09G0477900,OS04G0541700,OS02G0736200,OS01G0205300,OS07G0227600,OS03G0251350,OS09G0423300,OS07G0143200,OS02G0208…
GO:BP	cellular response to stress	GO:0033554	0.0028105067638204678	551	832	30	38866	OS01G0164900,OS07G0645200,OS03G0294900,OS01G0777300,OS09G0121000,OS02G0791700,OS06G0251100,OS01G0673600,OS01G0556400,OS01G0266000,OS01G0870300,OS03G0659900,OS06G0286351,OS02G0776800,OS02G0575500,OS03G0570300,OS05G0390100,OS01G0184900,OS04G0566100,OS01G0180600,OS03G0834000,OS09G0551900,OS03G0213400,OS04G0619700,OS04G0680700,OS02G0666300,OS04G0660500,OS01G0390900,OS03G0712300,OS06G0691000
GO:BP	ion transport	GO:0006811	0.0030890692762073307	854	832	40	38866	OS03G0861400,OS04G0491350,OS06G0671000,OS02G0117500,OS02G0191300,OS01G0503400,OS04G0613900,OS12G0421000,OS12G0194900,OS03G0178100,OS07G0679000,OS11G0106700,OS08G0100200,OS01G0935500,OS04G0444800,OS04G0605500,OS02G0701700,OS07G0669700,OS01G0266800,OS01G0870300,OS02G0825600,OS10G0506100,OS06G0633800,OS10G0567000,OS02G0196600,OS03G0684400,OS01G0678500,OS11G0140400,OS12G0638700,OS03G0785500,OS10G0572…
GO:BP	cellular protein metabolic process	GO:0044267	0.005830300036505372	3819	832	121	38866	OS07G0645200,OS09G0252700,OS01G0148000,OS12G0621000,OS03G0294900,OS07G0618400,OS05G0392050,OS02G0519900,OS04G0503500,OS11G0625900,OS02G0101600,OS04G0410200,OS03G0118400,OS11G0102200,OS05G0537400,OS05G0290300,OS02G0710500,OS09G0345300,OS01G0816600,OS01G0117700,OS05G0143500,OS12G0113500,OS01G0227200,OS02G0258900,OS03G0192500,OS02G0791700,OS02G0153100,OS08G0179000,OS02G0218400,OS06G0704800,OS12G0210…
GO:BP	cation transport	GO:0006812	0.007694653631633408	522	832	28	38866	OS03G0861400,OS04G0491350,OS06G0671000,OS01G0503400,OS04G0613900,OS12G0421000,OS03G0178100,OS07G0679000,OS11G0106700,OS08G0100200,OS01G0935500,OS04G0444800,OS04G0605500,OS02G0701700,OS07G0669700,OS01G0870300,OS02G0825600,OS10G0506100,OS02G0196600,OS03G0684400,OS01G0678500,OS11G0140400,OS12G0638700,OS03G0616400,OS07G0603800,OS04G0656100,OS12G0617800,OS06G0690700
GO:BP	protein phosphorylation	GO:0006468	0.008654764633984223	1461	832	57	38866	OS07G0618400,OS11G0625900,OS04G0410200,OS03G0118400,OS11G0102200,OS02G0710500,OS09G0345300,OS01G0816600,OS01G0117700,OS05G0143500,OS12G0113500,OS01G0227200,OS02G0791700,OS02G0153100,OS08G0179000,OS02G0218400,OS12G0210400,OS07G0537000,OS03G0319400,OS03G0339900,OS09G0423300,OS11G0171800,OS11G0216300,OS04G0616500,OS01G0536000,OS03G0170400,OS05G0256500,OS02G0819600,OS02G0591900,OS01G0960400,OS03G0268…
GO:BP	small molecule metabolic process	GO:0044281	0.011657389272754668	1338	832	53	38866	OS09G0294000,OS07G0416600,OS01G0682001,OS03G0412800,OS01G0616900,OS04G0498600,OS07G0484800,OS06G0167400,OS07G0658400,OS03G0850400,OS11G0131900,OS08G0360300,OS05G0460600,OS01G0101200,OS05G0164100,OS11G0525600,OS06G0256500,OS12G0128700,OS03G0210600,OS12G0210300,OS03G0679700,OS11G0256050,OS03G0689100,OS02G0778200,OS05G0455500,OS02G0562300,OS07G0186000,OS06G0245800,OS02G0739600,OS07G0640200,OS05G0187…
GO:BP	cellular response to DNA damage stimulus	GO:0006974	0.011935829240397095	287	832	19	38866	OS01G0164900,OS07G0645200,OS03G0294900,OS01G0777300,OS09G0121000,OS01G0673600,OS01G0870300,OS06G0286351,OS02G0776800,OS03G0570300,OS01G0184900,OS04G0566100,OS01G0180600,OS03G0834000,OS09G0551900,OS03G0213400,OS04G0680700,OS03G0712300,OS06G0691000
GO:BP	RNA metabolic process	GO:0016070	0.014745901470340552	2734	832	91	38866	OS09G0537700,OS09G0538000,OS06G0705350,OS07G0645200,OS05G0163250,OS01G0859500,OS09G0474000,OS02G0114033,OS06G0694300,OS05G0151000,OS08G0223700,OS11G0213500,OS02G0518500,OS05G0390800,OS03G0243200,OS08G0223766,OS08G0494350,OS01G0589900,OS01G0946200,OS01G0188200,OS05G0307200,OS09G0497900,OS06G0634100,OS04G0463800,OS06G0523900,OS08G0360300,OS01G0600400,OS06G0704800,OS09G0477900,OS01G0674700,OS04G0541…
GO:BP	transport	GO:0006810	0.015944534393452788	2326	832	80	38866	OS03G0861400,OS05G0392050,OS03G0638200,OS01G0626100,OS10G0210500,OS04G0491350,OS06G0158900,OS03G0858800,OS03G0823500,OS06G0671000,OS02G0117500,OS02G0191300,OS11G0508600,OS01G0503400,OS04G0613900,OS03G0835100,OS08G0156600,OS12G0421000,OS12G0194900,OS09G0546900,OS03G0178100,OS02G0681000,OS07G0679000,OS11G0106700,OS11G0518900,OS08G0100200,OS11G0276000,OS01G0935500,OS03G0823200,OS04G0444800,OS02G0739…
GO:BP	cellular biosynthetic process	GO:0044249	0.016731818756709635	3869	832	120	38866	OS07G0645200,OS09G0294000,OS01G0859500,OS09G0474000,OS02G0114033,OS07G0416600,OS09G0478300,OS01G0682001,OS04G0518800,OS02G0519900,OS05G0151000,OS08G0223700,OS02G0518500,OS05G0390800,OS01G0616900,OS04G0498600,OS08G0223766,OS07G0484800,OS01G0946200,OS05G0290300,OS06G0167400,OS07G0658400,OS03G0850400,OS09G0497900,OS02G0258900,OS06G0634100,OS03G0323200,OS08G0360300,OS10G0502400,OS10G0567400,OS05G0460…
GO:BP	organic cyclic compound biosynthetic process	GO:1901362	0.017022183136017433	2219	832	77	38866	OS07G0645200,OS01G0859500,OS09G0474000,OS02G0114033,OS07G0416600,OS05G0151000,OS08G0223700,OS02G0518500,OS05G0390800,OS01G0616900,OS04G0498600,OS08G0223766,OS07G0484800,OS01G0946200,OS09G0497900,OS02G0258900,OS06G0634100,OS03G0323200,OS08G0360300,OS10G0502400,OS10G0567400,OS05G0460600,OS06G0704800,OS09G0477900,OS04G0541700,OS02G0736200,OS01G0205300,OS07G0227600,OS03G0251350,OS09G0423300,OS07G0143…
GO:BP	response to light stimulus	GO:0009416	0.020054339001281726	247	832	17	38866	OS11G0102200,OS03G0251350,OS06G0142600,OS01G0321300,OS02G0575500,OS07G0192900,OS04G0566100,OS03G0684400,OS09G0306700,OS01G0180600,OS03G0311300,OS01G0390900,OS01G0178000,OS06G0691000,OS12G0617800,OS03G0309200,OS06G0690700
GO:BP	regulation of metabolic process	GO:0019222	0.02016714945934666	2342	832	80	38866	OS07G0645200,OS01G0859500,OS09G0474000,OS02G0114033,OS08G0223700,OS02G0518500,OS05G0390800,OS08G0223766,OS01G0946200,OS05G0143500,OS09G0497900,OS06G0634100,OS02G0791700,OS02G0672200,OS08G0360300,OS06G0704800,OS09G0477900,OS04G0541700,OS02G0736200,OS02G0831600,OS07G0227600,OS12G0572400,OS03G0251350,OS09G0423300,OS02G0739000,OS07G0143200,OS12G0636200,OS03G0210600,OS05G0357100,OS07G0515900,OS03G0659…
GO:BP	aromatic compound biosynthetic process	GO:0019438	0.02135099704350968	2123	832	74	38866	OS07G0645200,OS01G0859500,OS09G0474000,OS02G0114033,OS07G0416600,OS05G0151000,OS08G0223700,OS02G0518500,OS05G0390800,OS01G0616900,OS04G0498600,OS08G0223766,OS07G0484800,OS01G0946200,OS09G0497900,OS06G0634100,OS03G0323200,OS08G0360300,OS10G0502400,OS10G0567400,OS06G0704800,OS09G0477900,OS04G0541700,OS02G0736200,OS01G0205300,OS07G0227600,OS03G0251350,OS09G0423300,OS07G0143200,OS02G0208600,OS12G0636…
GO:BP	organic substance biosynthetic process	GO:1901576	0.02228957632948949	3934	832	121	38866	OS07G0645200,OS09G0294000,OS01G0859500,OS09G0474000,OS02G0114033,OS07G0416600,OS09G0478300,OS01G0682001,OS02G0519900,OS05G0151000,OS08G0223700,OS02G0518500,OS05G0390800,OS01G0616900,OS04G0498600,OS08G0223766,OS07G0484800,OS01G0946200,OS05G0290300,OS06G0167400,OS07G0658400,OS03G0850400,OS01G0299300,OS09G0497900,OS02G0258900,OS06G0634100,OS03G0323200,OS08G0360300,OS10G0502400,OS10G0567400,OS05G0460…
GO:BP	establishment of localization	GO:0051234	0.023648503736708234	2353	832	80	38866	OS03G0861400,OS05G0392050,OS03G0638200,OS01G0626100,OS10G0210500,OS04G0491350,OS06G0158900,OS03G0858800,OS03G0823500,OS06G0671000,OS02G0117500,OS02G0191300,OS11G0508600,OS01G0503400,OS04G0613900,OS03G0835100,OS08G0156600,OS12G0421000,OS12G0194900,OS09G0546900,OS03G0178100,OS02G0681000,OS07G0679000,OS11G0106700,OS11G0518900,OS08G0100200,OS11G0276000,OS01G0935500,OS03G0823200,OS04G0444800,OS02G0739…
GO:BP	regulation of biological process	GO:0050789	0.02541791046085738	3708	832	115	38866	OS07G0645200,OS01G0859500,OS09G0474000,OS02G0114033,OS07G0618400,OS05G0392050,OS08G0223700,OS02G0518500,OS05G0390800,OS08G0223766,OS03G0418700,OS11G0102200,OS01G0946200,OS03G0858800,OS05G0143500,OS09G0428600,OS12G0113500,OS09G0497900,OS02G0117500,OS01G0227200,OS06G0634100,OS02G0791700,OS02G0672200,OS08G0360300,OS06G0704800,OS09G0477900,OS04G0541700,OS02G0736200,OS02G0831600,OS11G0518900,OS03G0319…
GO:BP	response to radiation	GO:0009314	0.03305285427819827	257	832	17	38866	OS11G0102200,OS03G0251350,OS06G0142600,OS01G0321300,OS02G0575500,OS07G0192900,OS04G0566100,OS03G0684400,OS09G0306700,OS01G0180600,OS03G0311300,OS01G0390900,OS01G0178000,OS06G0691000,OS12G0617800,OS03G0309200,OS06G0690700
GO:BP	inorganic ion transmembrane transport	GO:0098660	0.03358589573479069	420	832	23	38866	OS04G0491350,OS06G0671000,OS01G0503400,OS04G0613900,OS03G0178100,OS07G0679000,OS08G0100200,OS01G0935500,OS04G0605500,OS02G0701700,OS07G0669700,OS02G0825600,OS10G0567000,OS03G0684400,OS01G0678500,OS11G0140400,OS12G0638700,OS03G0616400,OS07G0603800,OS04G0656100,OS04G0652400,OS12G0617800,OS06G0690700
GO:BP	ion transmembrane transport	GO:0034220	0.03621024877977826	600	832	29	38866	OS04G0491350,OS06G0671000,OS02G0191300,OS01G0503400,OS04G0613900,OS12G0194900,OS03G0178100,OS07G0679000,OS08G0100200,OS01G0935500,OS04G0605500,OS02G0701700,OS07G0669700,OS01G0266800,OS01G0870300,OS02G0825600,OS06G0633800,OS10G0567000,OS03G0684400,OS01G0678500,OS11G0140400,OS12G0638700,OS03G0616400,OS07G0603800,OS04G0656100,OS09G0570400,OS04G0652400,OS12G0617800,OS06G0690700
GO:BP	biosynthetic process	GO:0009058	0.04420043572555656	4117	832	124	38866	OS07G0645200,OS09G0294000,OS01G0859500,OS09G0474000,OS02G0114033,OS07G0416600,OS09G0478300,OS01G0682001,OS04G0518800,OS02G0519900,OS05G0151000,OS08G0223700,OS02G0518500,OS05G0390800,OS01G0616900,OS04G0498600,OS08G0223766,OS07G0484800,OS01G0946200,OS05G0290300,OS06G0167400,OS07G0658400,OS03G0850400,OS01G0299300,OS09G0497900,OS02G0258900,OS06G0634100,OS03G0323200,OS08G0360300,OS10G0502400,OS10G0567…
GO:CC	cell part	GO:0044464	5.051854561170074e-10	11170	832	331	38866	OS07G0645200,OS09G0252700,OS01G0148000,OS05G0163250,OS03G0816900,OS01G0859500,OS09G0474000,OS02G0114033,OS03G0294900,OS09G0478300,OS07G0618400,OS05G0392050,OS03G0788250,OS04G0518800,OS02G0519900,OS02G0698000,OS03G0412800,OS12G0615600,OS04G0503500,OS07G0671200,OS01G0777300,OS07G0599201,OS03G0859900,OS11G0625900,OS05G0151000,OS02G0518500,OS03G0243200,OS01G0626100,OS07G0539300,OS04G0498600,OS10G0210…
GO:CC	intracellular part	GO:0044424	5.459972453560219e-10	9323	832	287	38866	OS07G0645200,OS09G0252700,OS01G0148000,OS05G0163250,OS03G0816900,OS01G0859500,OS09G0474000,OS02G0114033,OS03G0294900,OS09G0478300,OS05G0392050,OS03G0788250,OS04G0518800,OS02G0519900,OS02G0698000,OS03G0412800,OS12G0615600,OS04G0503500,OS07G0671200,OS01G0777300,OS07G0599201,OS03G0859900,OS05G0151000,OS02G0518500,OS03G0243200,OS01G0626100,OS04G0498600,OS08G0433400,OS07G0484800,OS06G0158900,OS04G0410…
GO:CC	intracellular	GO:0005622	6.5333688932358e-10	9337	832	287	38866	OS07G0645200,OS09G0252700,OS01G0148000,OS05G0163250,OS03G0816900,OS01G0859500,OS09G0474000,OS02G0114033,OS03G0294900,OS09G0478300,OS05G0392050,OS03G0788250,OS04G0518800,OS02G0519900,OS02G0698000,OS03G0412800,OS12G0615600,OS04G0503500,OS07G0671200,OS01G0777300,OS07G0599201,OS03G0859900,OS05G0151000,OS02G0518500,OS03G0243200,OS01G0626100,OS04G0498600,OS08G0433400,OS07G0484800,OS06G0158900,OS04G0410…
GO:CC	cellular_component	GO:0005575	6.940230128350143e-10	15469	832	428	38866	OS09G0537700,OS09G0538000,OS03G0311401,OS07G0645200,OS09G0252700,OS01G0148000,OS05G0163250,OS07G0571200,OS01G0842500,OS09G0559500,OS03G0816900,OS01G0859500,OS02G0301450,OS09G0474000,OS02G0114033,OS12G0223000,OS12G0596501,OS03G0294900,OS09G0478300,OS07G0618400,OS05G0392050,OS01G0622066,OS03G0788250,OS01G0222900,OS04G0518800,OS02G0519900,OS02G0698000,OS03G0412800,OS03G0641300,OS12G0615600,OS10G0450…
GO:CC	cell	GO:0005623	7.530560753961876e-10	11289	832	333	38866	OS07G0645200,OS09G0252700,OS01G0148000,OS05G0163250,OS03G0816900,OS01G0859500,OS09G0474000,OS02G0114033,OS03G0294900,OS09G0478300,OS07G0618400,OS05G0392050,OS03G0788250,OS04G0518800,OS02G0519900,OS02G0698000,OS03G0412800,OS12G0615600,OS04G0503500,OS07G0671200,OS01G0777300,OS07G0599201,OS03G0859900,OS11G0625900,OS05G0151000,OS02G0518500,OS03G0243200,OS01G0626100,OS07G0539300,OS04G0498600,OS10G0210…
GO:CC	organelle	GO:0043226	0.000003819944719249086	7828	832	233	38866	OS07G0645200,OS05G0163250,OS03G0816900,OS01G0859500,OS09G0474000,OS02G0114033,OS03G0294900,OS09G0478300,OS05G0392050,OS03G0788250,OS04G0518800,OS02G0698000,OS03G0412800,OS12G0615600,OS07G0671200,OS01G0777300,OS07G0599201,OS03G0859900,OS05G0151000,OS02G0518500,OS03G0243200,OS08G0433400,OS06G0158900,OS04G0410200,OS09G0121000,OS11G0102200,OS07G0101200,OS05G0579300,OS01G0946200,OS01G0188200,OS06G0167…
GO:CC	intracellular membrane-bounded organelle	GO:0043231	0.000004072856161413165	7216	832	218	38866	OS07G0645200,OS05G0163250,OS01G0859500,OS09G0474000,OS02G0114033,OS03G0294900,OS09G0478300,OS05G0392050,OS03G0788250,OS04G0518800,OS02G0698000,OS03G0412800,OS12G0615600,OS07G0671200,OS01G0777300,OS07G0599201,OS03G0859900,OS05G0151000,OS02G0518500,OS03G0243200,OS08G0433400,OS06G0158900,OS04G0410200,OS09G0121000,OS11G0102200,OS07G0101200,OS05G0579300,OS01G0946200,OS01G0188200,OS06G0167400,OS07G0119…
GO:CC	membrane-bounded organelle	GO:0043227	0.000005045573349930619	7317	832	220	38866	OS07G0645200,OS05G0163250,OS01G0859500,OS09G0474000,OS02G0114033,OS03G0294900,OS09G0478300,OS05G0392050,OS03G0788250,OS04G0518800,OS02G0698000,OS03G0412800,OS12G0615600,OS07G0671200,OS01G0777300,OS07G0599201,OS03G0859900,OS05G0151000,OS02G0518500,OS03G0243200,OS08G0433400,OS06G0158900,OS04G0410200,OS09G0121000,OS11G0102200,OS07G0101200,OS05G0579300,OS01G0946200,OS01G0188200,OS06G0167400,OS07G0119…
GO:CC	intracellular organelle	GO:0043229	0.000005271387327557577	7816	832	232	38866	OS07G0645200,OS05G0163250,OS03G0816900,OS01G0859500,OS09G0474000,OS02G0114033,OS03G0294900,OS09G0478300,OS05G0392050,OS03G0788250,OS04G0518800,OS02G0698000,OS03G0412800,OS12G0615600,OS07G0671200,OS01G0777300,OS07G0599201,OS03G0859900,OS05G0151000,OS02G0518500,OS03G0243200,OS08G0433400,OS06G0158900,OS04G0410200,OS09G0121000,OS11G0102200,OS07G0101200,OS05G0579300,OS01G0946200,OS01G0188200,OS06G0167…
GO:CC	nucleus	GO:0005634	0.00002627177039284536	3684	832	125	38866	OS07G0645200,OS05G0163250,OS01G0859500,OS09G0474000,OS02G0114033,OS03G0294900,OS03G0788250,OS04G0518800,OS01G0777300,OS05G0151000,OS02G0518500,OS03G0243200,OS08G0433400,OS04G0410200,OS09G0121000,OS11G0102200,OS05G0579300,OS01G0946200,OS01G0188200,OS07G0119300,OS05G0143500,OS09G0497900,OS06G0523900,OS02G0598400,OS08G0360300,OS06G0704800,OS09G0477900,OS04G0541700,OS02G0736200,OS11G0518900,OS01G0673…
GO:CC	cytoplasm	GO:0005737	0.000361790487560855	6073	832	180	38866	OS09G0252700,OS01G0148000,OS03G0294900,OS09G0478300,OS05G0392050,OS04G0518800,OS02G0519900,OS02G0698000,OS03G0412800,OS12G0615600,OS07G0671200,OS07G0599201,OS03G0859900,OS05G0151000,OS01G0626100,OS04G0498600,OS07G0484800,OS06G0158900,OS04G0410200,OS11G0102200,OS07G0101200,OS06G0167400,OS07G0658400,OS01G0642000,OS05G0143500,OS03G0850400,OS05G0132000,OS02G0170000,OS06G0634100,OS02G0791700,OS09G0485…
GO:CC	intracellular organelle part	GO:0044446	0.012163519544225985	3305	832	103	38866	OS07G0645200,OS05G0163250,OS09G0478300,OS05G0392050,OS03G0788250,OS03G0412800,OS05G0151000,OS03G0243200,OS06G0158900,OS09G0121000,OS01G0188200,OS01G0642000,OS03G0850400,OS09G0485201,OS11G0683500,OS06G0523900,OS03G0835100,OS02G0598400,OS10G0567400,OS07G0666600,OS09G0477900,OS02G0736200,OS03G0747900,OS01G0556400,OS12G0572400,OS12G0480100,OS11G0525600,OS05G0490000,OS09G0423300,OS05G0575300,OS02G0739…
GO:CC	organelle part	GO:0044422	0.012882168135965722	3310	832	103	38866	OS07G0645200,OS05G0163250,OS09G0478300,OS05G0392050,OS03G0788250,OS03G0412800,OS05G0151000,OS03G0243200,OS06G0158900,OS09G0121000,OS01G0188200,OS01G0642000,OS03G0850400,OS09G0485201,OS11G0683500,OS06G0523900,OS03G0835100,OS02G0598400,OS10G0567400,OS07G0666600,OS09G0477900,OS02G0736200,OS03G0747900,OS01G0556400,OS12G0572400,OS12G0480100,OS11G0525600,OS05G0490000,OS09G0423300,OS05G0575300,OS02G0739…
GO:CC	cytoplasmic stress granule	GO:0010494	0.014743154667593716	5	832	3	38866	OS02G0739000,OS01G0266000,OS10G0439600
GO:CC	cytoplasmic part	GO:0044444	0.02049649814494416	4927	832	142	38866	OS09G0478300,OS05G0392050,OS04G0518800,OS02G0519900,OS02G0698000,OS03G0412800,OS12G0615600,OS07G0671200,OS07G0599201,OS03G0859900,OS05G0151000,OS01G0626100,OS04G0498600,OS07G0484800,OS06G0158900,OS07G0101200,OS06G0167400,OS07G0658400,OS01G0642000,OS03G0850400,OS05G0132000,OS02G0170000,OS06G0634100,OS09G0485201,OS11G0683500,OS10G0116000,OS03G0835100,OS08G0272200,OS02G0598400,OS10G0502400,OS10G0567…
GO:CC	chloroplast	GO:0009507	0.03108908798990804	1226	832	46	38866	OS02G0698000,OS03G0412800,OS03G0859900,OS05G0151000,OS07G0658400,OS03G0850400,OS09G0485201,OS11G0683500,OS03G0835100,OS10G0502400,OS10G0567400,OS05G0460600,OS01G0674700,OS12G0480100,OS05G0575300,OS02G0739000,OS03G0735000,OS03G0679700,OS06G0286351,OS01G0321300,OS02G0575500,OS08G0379300,OS01G0235100,OS05G0405000,OS05G0390100,OS10G0548800,OS08G0457600,OS04G0640500,OS11G0592700,OS03G0684400,OS02G0234…
GO:CC	plastid part	GO:0044435	0.04811166608339582	668	832	29	38866	OS03G0412800,OS03G0850400,OS09G0485201,OS11G0683500,OS03G0835100,OS10G0567400,OS12G0480100,OS05G0575300,OS02G0739000,OS03G0735000,OS03G0679700,OS01G0321300,OS02G0575500,OS08G0379300,OS01G0235100,OS05G0405000,OS05G0390100,OS10G0548800,OS04G0640500,OS03G0684400,OS02G0234500,OS06G0498400,OS03G0311300,OS07G0163500,OS03G0838900,OS09G0570400,OS12G0617800,OS08G0387500,OS06G0690700
GO:CC	plastid	GO:0009536	0.04917736448576075	1252	832	46	38866	OS02G0698000,OS03G0412800,OS03G0859900,OS05G0151000,OS07G0658400,OS03G0850400,OS09G0485201,OS11G0683500,OS03G0835100,OS10G0502400,OS10G0567400,OS05G0460600,OS01G0674700,OS12G0480100,OS05G0575300,OS02G0739000,OS03G0735000,OS03G0679700,OS06G0286351,OS01G0321300,OS02G0575500,OS08G0379300,OS01G0235100,OS05G0405000,OS05G0390100,OS10G0548800,OS08G0457600,OS04G0640500,OS11G0592700,OS03G0684400,OS02G0234…
KEGG	KEGG root term	KEGG:00000	0.00045946933166302485	3369	832	108	38866	OS09G0294000,OS01G0859500,OS02G0698000,OS03G0412800,OS01G0777300,OS04G0498600,OS07G0484800,OS06G0167400,OS07G0658400,OS05G0143500,OS02G0258900,OS10G0483500,OS02G0221300,OS11G0683500,OS11G0131900,OS10G0502400,OS03G0178100,OS10G0567400,OS05G0460600,OS05G0164100,OS09G0272900,OS01G0673600,OS10G0163040,OS08G0301500,OS01G0556400,OS12G0572400,OS11G0525600,OS01G0966000,OS04G0412500,OS08G0157600,OS09G0476…

## Sheet: Bv only
source	term_name	term_id	adjusted_p_value	term_size	query_size	intersection_size	effective_domain_size	intersections
GO:MF	molecular_function	GO:0003674	1.1215943459773656e-7	17727	433	262	38866	OS04G0538400,OS01G0597600,OS12G0154700,OS12G0603700,OS01G0699400,OS12G0240900,OS12G0154800,OS03G0195100,OS04G0457300,OS01G0850550,OS05G0528600,OS12G0199800,OS02G0202900,OS09G0283600,OS03G0181100,OS02G0676800,OS04G0305700,OS01G0196300,OS01G0300900,OS07G0117900,OS03G0326200,OS10G0389300,OS10G0571600,OS05G0562300,OS10G0442400,OS04G0301500,OS05G0427400,OS11G0579900,OS02G0570400,OS03G0293500,OS07G0178…
GO:MF	transporter activity	GO:0005215	0.0010076042486625973	1262	433	34	38866	OS04G0538400,OS01G0597600,OS04G0457300,OS09G0426100,OS03G0146100,OS03G0161200,OS09G0469950,OS07G0257200,OS07G0524900,OS01G0337500,OS03G0626700,OS04G0448800,OS10G0579800,OS09G0513200,OS05G0410900,OS10G0470700,OS06G0228200,OS08G0503700,OS05G0214300,OS06G0190800,OS05G0316100,OS01G0504500,OS01G0975900,OS07G0103100,OS03G0296800,OS02G0102200,OS01G0869200,OS10G0110800,OS05G0444300,OS04G0599400,OS03G0752…
GO:MF	inorganic molecular entity transmembrane transporter activity	GO:0015318	0.002764646120670964	663	433	22	38866	OS04G0538400,OS01G0597600,OS03G0146100,OS03G0161200,OS07G0257200,OS01G0337500,OS04G0448800,OS10G0579800,OS05G0410900,OS10G0470700,OS06G0190800,OS05G0316100,OS01G0975900,OS07G0103100,OS03G0296800,OS02G0102200,OS01G0869200,OS10G0110800,OS03G0752300,OS01G0898900,OS04G0529800,OS02G0823100
GO:MF	transmembrane transporter activity	GO:0022857	0.0050938935047851065	1186	433	31	38866	OS04G0538400,OS01G0597600,OS04G0457300,OS09G0426100,OS03G0146100,OS03G0161200,OS07G0257200,OS07G0524900,OS01G0337500,OS03G0626700,OS04G0448800,OS10G0579800,OS09G0513200,OS05G0410900,OS10G0470700,OS06G0228200,OS05G0214300,OS06G0190800,OS05G0316100,OS01G0504500,OS01G0975900,OS07G0103100,OS03G0296800,OS02G0102200,OS01G0869200,OS10G0110800,OS05G0444300,OS03G0752300,OS01G0898900,OS04G0529800,OS02G0823…
GO:MF	cellulose synthase (UDP-forming) activity	GO:0016760	0.007659620076224524	30	433	5	38866	OS07G0208500,OS05G0176100,OS07G0252400,OS07G0424400,OS10G0341700
GO:MF	cellulose synthase activity	GO:0016759	0.007659620076224524	30	433	5	38866	OS07G0208500,OS05G0176100,OS07G0252400,OS07G0424400,OS10G0341700
GO:MF	binding	GO:0005488	0.02382594855885968	11937	433	171	38866	OS12G0154700,OS12G0603700,OS01G0699400,OS12G0240900,OS12G0154800,OS03G0195100,OS01G0850550,OS05G0528600,OS12G0199800,OS02G0202900,OS09G0283600,OS03G0181100,OS02G0676800,OS01G0196300,OS01G0300900,OS07G0117900,OS03G0326200,OS10G0571600,OS05G0562300,OS04G0301500,OS11G0579900,OS02G0570400,OS03G0293500,OS07G0178600,OS08G0386200,OS05G0380900,OS08G0235800,OS11G0569300,OS12G0605200,OS01G0289600,OS05G0106…
GO:MF	UDP-glucosyltransferase activity	GO:0035251	0.04663066016548788	167	433	9	38866	OS04G0305700,OS10G0442400,OS07G0208500,OS05G0176100,OS07G0252400,OS02G0188000,OS07G0240600,OS07G0424400,OS10G0341700
GO:BP	cellulose biosynthetic process	GO:0030244	0.0005500813637106194	47	433	7	38866	OS03G0754500,OS07G0208500,OS05G0176100,OS07G0252400,OS03G0266800,OS07G0424400,OS10G0341700
GO:BP	biological regulation	GO:0065007	0.0011504179306990388	4312	433	81	38866	OS04G0538400,OS03G0195100,OS09G0283600,OS03G0181100,OS02G0676800,OS01G0196300,OS03G0326200,OS10G0571600,OS11G0143300,OS07G0178600,OS08G0386200,OS08G0235800,OS01G0289600,OS11G0154500,OS12G0139400,OS12G0603800,OS07G0257200,OS05G0153000,OS03G0764300,OS08G0249100,OS01G0759400,OS01G0752500,OS03G0306302,OS10G0560400,OS01G0862800,OS04G0517100,OS07G0619600,OS05G0566400,OS09G0286600,OS12G0555000,OS03G0327…
GO:BP	biological_process	GO:0008150	0.001974316338865572	15028	433	214	38866	OS04G0538400,OS01G0597600,OS12G0603700,OS01G0699400,OS12G0240900,OS03G0195100,OS04G0457300,OS01G0850550,OS05G0528600,OS12G0199800,OS09G0283600,OS03G0181100,OS02G0676800,OS01G0196300,OS03G0326200,OS12G0148400,OS10G0389300,OS10G0571600,OS11G0143300,OS05G0562300,OS05G0427400,OS02G0570400,OS03G0754500,OS07G0178600,OS08G0386200,OS06G0323100,OS09G0426100,OS08G0235800,OS03G0793600,OS11G0569300,OS01G0289…
GO:BP	beta-glucan biosynthetic process	GO:0051274	0.002101209628636879	57	433	7	38866	OS03G0754500,OS07G0208500,OS05G0176100,OS07G0252400,OS03G0266800,OS07G0424400,OS10G0341700
GO:BP	carbohydrate biosynthetic process	GO:0016051	0.004869487577061497	258	433	13	38866	OS03G0754500,OS07G0208500,OS06G0561000,OS05G0176100,OS07G0252400,OS03G0266800,OS07G0209100,OS07G0134400,OS07G0424400,OS03G0211800,OS10G0341700,OS08G0409100,OS06G0229200
GO:BP	plant-type primary cell wall biogenesis	GO:0009833	0.008444920276496726	28	433	5	38866	OS07G0208500,OS05G0176100,OS07G0252400,OS07G0424400,OS10G0341700
GO:BP	ion transport	GO:0006811	0.00889905868949764	854	433	25	38866	OS04G0538400,OS01G0597600,OS03G0326200,OS03G0161200,OS09G0469950,OS07G0257200,OS01G0337500,OS04G0448800,OS10G0579800,OS02G0510600,OS05G0410900,OS10G0470700,OS08G0503700,OS06G0190800,OS05G0316100,OS07G0103100,OS03G0296800,OS03G0263700,OS02G0102200,OS01G0869200,OS10G0110800,OS04G0599400,OS03G0752300,OS01G0898900,OS04G0529800
GO:BP	cellulose metabolic process	GO:0030243	0.010143206102244496	72	433	7	38866	OS03G0754500,OS07G0208500,OS05G0176100,OS07G0252400,OS03G0266800,OS07G0424400,OS10G0341700
GO:BP	regulation of biological process	GO:0050789	0.010532225563517286	3708	433	69	38866	OS03G0195100,OS09G0283600,OS03G0181100,OS02G0676800,OS01G0196300,OS10G0571600,OS11G0143300,OS07G0178600,OS08G0386200,OS08G0235800,OS01G0289600,OS11G0154500,OS12G0139400,OS12G0603800,OS05G0153000,OS03G0764300,OS08G0249100,OS01G0759400,OS01G0752500,OS03G0306302,OS10G0560400,OS01G0862800,OS04G0517100,OS07G0619600,OS05G0566400,OS09G0286600,OS12G0555000,OS03G0327800,OS04G0605100,OS06G0662200,OS07G0124…
GO:BP	mitotic cytokinesis	GO:0000281	0.014204005811336703	31	433	5	38866	OS07G0208500,OS05G0176100,OS07G0252400,OS07G0424400,OS10G0341700
GO:BP	cytoskeleton-dependent cytokinesis	GO:0061640	0.019480378891531668	33	433	5	38866	OS07G0208500,OS05G0176100,OS07G0252400,OS07G0424400,OS10G0341700
GO:BP	beta-glucan metabolic process	GO:0051273	0.023794436080356963	82	433	7	38866	OS03G0754500,OS07G0208500,OS05G0176100,OS07G0252400,OS03G0266800,OS07G0424400,OS10G0341700
GO:BP	transmembrane transport	GO:0055085	0.030386137597485943	1273	433	31	38866	OS04G0538400,OS01G0597600,OS04G0457300,OS09G0426100,OS03G0146100,OS03G0161200,OS09G0469950,OS07G0257200,OS07G0524900,OS01G0337500,OS03G0626700,OS04G0448800,OS10G0579800,OS09G0513200,OS05G0410900,OS10G0470700,OS06G0228200,OS08G0503700,OS05G0214300,OS05G0316100,OS01G0504500,OS01G0975900,OS03G0296800,OS02G0102200,OS01G0869200,OS10G0110800,OS05G0444300,OS03G0752300,OS01G0898900,OS04G0529800,OS02G0823…
GO:CC	cellular_component	GO:0005575	5.555767649120744e-8	15469	433	236	38866	OS04G0538400,OS01G0597600,OS12G0154700,OS12G0240900,OS12G0154800,OS08G0404500,OS03G0128000,OS03G0195100,OS04G0457300,OS01G0850550,OS12G0199800,OS09G0283600,OS03G0181100,OS02G0676800,OS04G0305700,OS03G0780200,OS03G0326200,OS01G0246400,OS10G0571600,OS05G0562300,OS10G0442400,OS05G0427400,OS03G0293500,OS03G0754500,OS07G0178600,OS08G0386200,OS09G0426100,OS08G0235800,OS01G0382000,OS11G0569300,OS01G0929…
GO:CC	intrinsic component of membrane	GO:0031224	0.00007129556158808527	6123	433	108	38866	OS04G0538400,OS01G0597600,OS08G0404500,OS03G0128000,OS04G0457300,OS03G0780200,OS03G0326200,OS03G0754500,OS09G0426100,OS11G0569300,OS01G0929000,OS09G0364400,OS01G0113650,OS03G0146100,OS03G0161200,OS01G0186600,OS09G0469950,OS07G0257200,OS09G0248100,OS07G0524900,OS06G0207950,OS03G0140200,OS08G0280600,OS09G0129500,OS02G0791500,OS12G0215950,OS09G0551400,OS02G0221900,OS03G0850200,OS03G0253600,OS07G0605…
GO:CC	cell	GO:0005623	0.00010067718929470067	11289	433	173	38866	OS04G0538400,OS01G0597600,OS12G0154700,OS12G0240900,OS12G0154800,OS03G0128000,OS03G0195100,OS04G0457300,OS09G0283600,OS03G0181100,OS02G0676800,OS04G0305700,OS03G0326200,OS01G0246400,OS10G0571600,OS05G0562300,OS10G0442400,OS05G0427400,OS03G0293500,OS03G0754500,OS07G0178600,OS08G0386200,OS09G0426100,OS08G0235800,OS01G0289600,OS02G0627100,OS11G0154500,OS01G0113650,OS03G0146100,OS12G0139400,OS12G0603…
GO:CC	plasma membrane	GO:0005886	0.00010076991155347273	1888	433	46	38866	OS01G0597600,OS03G0128000,OS04G0457300,OS03G0326200,OS03G0754500,OS09G0426100,OS01G0113650,OS03G0161200,OS09G0248100,OS07G0524900,OS08G0249100,OS09G0551400,OS07G0208500,OS02G0165100,OS08G0203300,OS11G0595200,OS05G0176100,OS12G0108100,OS01G0864500,OS06G0234200,OS11G0108800,OS05G0156500,OS01G0171000,OS10G0521000,OS05G0410900,OS03G0626500,OS06G0228200,OS07G0252400,OS05G0214300,OS04G0685300,OS03G0266…
GO:CC	cell part	GO:0044464	0.00013316736165800512	11170	433	171	38866	OS01G0597600,OS12G0154700,OS12G0240900,OS12G0154800,OS03G0128000,OS03G0195100,OS04G0457300,OS09G0283600,OS03G0181100,OS02G0676800,OS04G0305700,OS03G0326200,OS01G0246400,OS10G0571600,OS05G0562300,OS10G0442400,OS05G0427400,OS03G0293500,OS03G0754500,OS07G0178600,OS08G0386200,OS09G0426100,OS08G0235800,OS01G0289600,OS02G0627100,OS11G0154500,OS01G0113650,OS03G0146100,OS12G0139400,OS12G0603800,OS03G0161…
GO:CC	membrane	GO:0016020	0.00014466054125371593	7663	433	127	38866	OS04G0538400,OS01G0597600,OS08G0404500,OS03G0128000,OS04G0457300,OS12G0199800,OS03G0780200,OS03G0326200,OS01G0246400,OS03G0754500,OS09G0426100,OS11G0569300,OS01G0929000,OS09G0364400,OS01G0113650,OS03G0146100,OS03G0161200,OS01G0186600,OS09G0469950,OS07G0257200,OS09G0248100,OS07G0524900,OS08G0249100,OS06G0207950,OS03G0140200,OS08G0280600,OS09G0129500,OS02G0791500,OS12G0215950,OS09G0551400,OS02G0221…
GO:CC	integral component of membrane	GO:0016021	0.0001655118112963172	6005	433	105	38866	OS04G0538400,OS01G0597600,OS08G0404500,OS04G0457300,OS03G0780200,OS03G0326200,OS09G0426100,OS11G0569300,OS01G0929000,OS09G0364400,OS01G0113650,OS03G0146100,OS03G0161200,OS01G0186600,OS09G0469950,OS07G0257200,OS07G0524900,OS06G0207950,OS03G0140200,OS08G0280600,OS09G0129500,OS02G0791500,OS12G0215950,OS09G0551400,OS02G0221900,OS03G0850200,OS03G0253600,OS07G0605350,OS05G0181700,OS07G0208500,OS01G0337…
GO:CC	membrane part	GO:0044425	0.0005964421306969197	6478	433	109	38866	OS04G0538400,OS01G0597600,OS08G0404500,OS03G0128000,OS04G0457300,OS03G0780200,OS03G0326200,OS03G0754500,OS09G0426100,OS11G0569300,OS01G0929000,OS09G0364400,OS01G0113650,OS03G0146100,OS03G0161200,OS01G0186600,OS09G0469950,OS07G0257200,OS09G0248100,OS07G0524900,OS06G0207950,OS03G0140200,OS08G0280600,OS09G0129500,OS02G0791500,OS12G0215950,OS09G0551400,OS02G0221900,OS03G0850200,OS03G0253600,OS07G0605…
GO:CC	cell periphery	GO:0071944	0.0015433889867073616	2289	433	49	38866	OS01G0597600,OS12G0154700,OS12G0154800,OS03G0128000,OS04G0457300,OS03G0326200,OS03G0754500,OS09G0426100,OS01G0113650,OS03G0161200,OS09G0248100,OS07G0524900,OS08G0249100,OS09G0551400,OS07G0208500,OS02G0165100,OS08G0203300,OS04G0288100,OS11G0595200,OS05G0176100,OS12G0108100,OS01G0864500,OS06G0234200,OS11G0108800,OS05G0156500,OS01G0171000,OS10G0521000,OS05G0410900,OS03G0626500,OS06G0228200,OS07G0252…
GO:CC	nucleosome	GO:0000786	0.014415434507648688	66	433	6	38866	OS09G0553100,OS05G0574300,OS03G0279200,OS10G0539500,OS07G0545400,OS01G0153100
GO:CC	DNA packaging complex	GO:0044815	0.021684656504895698	71	433	6	38866	OS09G0553100,OS05G0574300,OS03G0279200,OS10G0539500,OS07G0545400,OS01G0153100
