# Supplementary material for: Paraburkholderia phytofirmans PsJN colonization of rice endosphere triggers an atypical transcriptomic response compared to rice native Burkholderia s.l. endophytes
Source: Sci Rep. 2023 Jul 3;13:10696. doi: 10.1038/s41598-023-37314-7 (PMC10317989; doi:10.1038/s41598-023-37314-7)
Supplement: Supplementary file 13 — Supplementary Table S7. [file 41598_2023_37314_MOESM13_ESM.xlsx]

## Sheet: PsJN only
Supplementary Table S7: Gene Ontology (GO) terms and Kyoto Encyclopedia of Genes and Genomes (KEGG) pathway enrichment analysis on the different pool of DEGs shared or not among the response to the three endophytic species (as indicated by the label of each sheet)
source	term_name	term_id	adjusted_p_value	term_size	query_size	intersection_size	effective_domain_size	intersections
GO:MF	adenyl ribonucleotide binding	GO:0032559	0.0001462519167286829	3221	184	58	19516	OS12G0198900,OS10G0180800,OS05G0231100,OS02G0153100,OS06G0693100,OS03G0352450,OS08G0203700,OS01G0816600,OS06G0146250,OS08G0170100,OS11G0586001,OS11G0609500,OS01G0781100,OS04G0503200,OS02G0286850,OS11G0689400,OS03G0599000,OS01G0777700,OS05G0258400,OS12G0210400,OS12G0611100,OS03G0108600,OS04G0304200,OS01G0106700,OS03G0108800,OS07G0481300,OS04G0616300,OS07G0621500,OS02G0141300,OS02G0241600,OS04G0512…
GO:MF	adenyl nucleotide binding	GO:0030554	0.0001575620912542349	3228	184	58	19516	OS12G0198900,OS10G0180800,OS05G0231100,OS02G0153100,OS06G0693100,OS03G0352450,OS08G0203700,OS01G0816600,OS06G0146250,OS08G0170100,OS11G0586001,OS11G0609500,OS01G0781100,OS04G0503200,OS02G0286850,OS11G0689400,OS03G0599000,OS01G0777700,OS05G0258400,OS12G0210400,OS12G0611100,OS03G0108600,OS04G0304200,OS01G0106700,OS03G0108800,OS07G0481300,OS04G0616300,OS07G0621500,OS02G0141300,OS02G0241600,OS04G0512…
GO:MF	carbohydrate derivative binding	GO:0097367	0.00034376979325444266	3555	184	61	19516	OS12G0198900,OS10G0180800,OS05G0231100,OS02G0153100,OS02G0257300,OS06G0693100,OS03G0352450,OS08G0203700,OS01G0816600,OS06G0146250,OS08G0170100,OS11G0586001,OS11G0609500,OS01G0781100,OS04G0503200,OS02G0286850,OS11G0689400,OS03G0599000,OS01G0777700,OS05G0258400,OS12G0210400,OS12G0611100,OS03G0108600,OS04G0304200,OS01G0106700,OS03G0108800,OS07G0481300,OS04G0616300,OS07G0621500,OS02G0141300,OS02G0241…
GO:MF	ribonucleotide binding	GO:0032553	0.000446265060356669	3497	184	60	19516	OS12G0198900,OS10G0180800,OS05G0231100,OS02G0153100,OS06G0693100,OS03G0352450,OS08G0203700,OS01G0816600,OS06G0146250,OS08G0170100,OS11G0586001,OS11G0609500,OS01G0781100,OS04G0503200,OS02G0286850,OS11G0689400,OS03G0599000,OS01G0777700,OS05G0258400,OS12G0210400,OS12G0611100,OS03G0108600,OS04G0304200,OS01G0106700,OS03G0108800,OS07G0481300,OS04G0616300,OS07G0621500,OS02G0141300,OS02G0241600,OS04G0512…
GO:MF	kinase activity	GO:0016301	0.0005149583043556685	1993	184	41	19516	OS10G0180800,OS05G0231100,OS02G0153100,OS08G0203700,OS01G0816600,OS11G0586001,OS11G0609500,OS04G0503200,OS01G0777700,OS01G0851000,OS05G0258400,OS12G0210400,OS12G0611100,OS01G0782200,OS04G0304200,OS01G0106700,OS03G0108800,OS04G0616300,OS02G0141300,OS02G0241600,OS06G0663900,OS04G0616500,OS08G0103000,OS10G0103800,OS10G0362300,OS07G0668900,OS01G0748600,OS02G0190500,OS01G0923700,OS11G0194900,OS11G0216…
GO:MF	purine ribonucleotide binding	GO:0032555	0.0006884139143990025	3457	184	59	19516	OS12G0198900,OS10G0180800,OS05G0231100,OS02G0153100,OS06G0693100,OS03G0352450,OS08G0203700,OS01G0816600,OS06G0146250,OS08G0170100,OS11G0586001,OS11G0609500,OS01G0781100,OS04G0503200,OS02G0286850,OS11G0689400,OS03G0599000,OS01G0777700,OS05G0258400,OS12G0210400,OS12G0611100,OS03G0108600,OS04G0304200,OS01G0106700,OS03G0108800,OS07G0481300,OS04G0616300,OS07G0621500,OS02G0141300,OS02G0241600,OS04G0512…
GO:MF	purine nucleotide binding	GO:0017076	0.0007436295119039933	3465	184	59	19516	OS12G0198900,OS10G0180800,OS05G0231100,OS02G0153100,OS06G0693100,OS03G0352450,OS08G0203700,OS01G0816600,OS06G0146250,OS08G0170100,OS11G0586001,OS11G0609500,OS01G0781100,OS04G0503200,OS02G0286850,OS11G0689400,OS03G0599000,OS01G0777700,OS05G0258400,OS12G0210400,OS12G0611100,OS03G0108600,OS04G0304200,OS01G0106700,OS03G0108800,OS07G0481300,OS04G0616300,OS07G0621500,OS02G0141300,OS02G0241600,OS04G0512…
GO:MF	phosphotransferase activity, alcohol group as acceptor	GO:0016773	0.0007822915542340278	1803	184	38	19516	OS10G0180800,OS05G0231100,OS02G0153100,OS08G0203700,OS01G0816600,OS11G0586001,OS11G0609500,OS04G0503200,OS01G0851000,OS05G0258400,OS12G0210400,OS12G0611100,OS01G0782200,OS04G0304200,OS01G0106700,OS03G0108800,OS04G0616300,OS02G0141300,OS02G0241600,OS06G0663900,OS04G0616500,OS08G0103000,OS10G0103800,OS10G0362300,OS07G0668900,OS01G0748600,OS02G0190500,OS01G0923700,OS11G0194900,OS11G0216000,OS07G0602…
GO:MF	nucleotide binding	GO:0000166	0.001554884759878229	3802	184	62	19516	OS12G0198900,OS10G0180800,OS05G0231100,OS02G0153100,OS06G0693100,OS03G0352450,OS08G0203700,OS01G0816600,OS06G0146250,OS08G0170100,OS11G0586001,OS11G0609500,OS01G0781100,OS04G0503200,OS02G0286850,OS11G0689400,OS03G0599000,OS01G0777700,OS05G0258400,OS12G0210400,OS12G0611100,OS03G0108600,OS04G0304200,OS01G0106700,OS03G0108800,OS07G0481300,OS04G0616300,OS07G0621500,OS02G0141300,OS02G0241600,OS04G0512…
GO:MF	nucleoside phosphate binding	GO:1901265	0.001554884759878229	3802	184	62	19516	OS12G0198900,OS10G0180800,OS05G0231100,OS02G0153100,OS06G0693100,OS03G0352450,OS08G0203700,OS01G0816600,OS06G0146250,OS08G0170100,OS11G0586001,OS11G0609500,OS01G0781100,OS04G0503200,OS02G0286850,OS11G0689400,OS03G0599000,OS01G0777700,OS05G0258400,OS12G0210400,OS12G0611100,OS03G0108600,OS04G0304200,OS01G0106700,OS03G0108800,OS07G0481300,OS04G0616300,OS07G0621500,OS02G0141300,OS02G0241600,OS04G0512…
GO:MF	transferase activity, transferring phosphorus-containing groups	GO:0016772	0.005012053092074644	2262	184	42	19516	OS10G0180800,OS05G0231100,OS02G0153100,OS08G0203700,OS01G0816600,OS11G0586001,OS11G0609500,OS04G0503200,OS12G0293100,OS01G0777700,OS01G0851000,OS05G0258400,OS12G0210400,OS12G0611100,OS01G0782200,OS04G0304200,OS01G0106700,OS03G0108800,OS04G0616300,OS02G0141300,OS02G0241600,OS06G0663900,OS04G0616500,OS08G0103000,OS10G0103800,OS10G0362300,OS07G0668900,OS01G0748600,OS02G0190500,OS01G0923700,OS11G0194…
GO:MF	small molecule binding	GO:0036094	0.005368997246489354	4035	184	63	19516	OS12G0198900,OS10G0180800,OS05G0231100,OS02G0153100,OS06G0693100,OS03G0352450,OS08G0203700,OS01G0816600,OS06G0146250,OS08G0170100,OS11G0586001,OS11G0609500,OS02G0581400,OS01G0781100,OS04G0503200,OS02G0286850,OS11G0689400,OS03G0599000,OS01G0777700,OS05G0258400,OS12G0210400,OS12G0611100,OS03G0108600,OS04G0304200,OS01G0106700,OS03G0108800,OS07G0481300,OS04G0616300,OS07G0621500,OS02G0141300,OS02G0241…
GO:MF	anion binding	GO:0043168	0.009654994178356548	4019	184	62	19516	OS12G0198900,OS10G0180800,OS05G0231100,OS02G0153100,OS06G0693100,OS03G0352450,OS08G0203700,OS01G0816600,OS06G0146250,OS08G0170100,OS11G0586001,OS11G0609500,OS02G0581400,OS01G0781100,OS04G0503200,OS02G0286850,OS11G0689400,OS03G0599000,OS01G0777700,OS05G0258400,OS12G0210400,OS12G0611100,OS03G0108600,OS04G0304200,OS01G0106700,OS03G0108800,OS07G0481300,OS04G0616300,OS07G0621500,OS02G0141300,OS02G0241…
GO:MF	ATP binding	GO:0005524	0.01039036254212879	2738	184	47	19516	OS10G0180800,OS05G0231100,OS02G0153100,OS03G0352450,OS08G0203700,OS01G0816600,OS11G0586001,OS11G0609500,OS04G0503200,OS11G0689400,OS01G0777700,OS05G0258400,OS12G0210400,OS12G0611100,OS03G0108600,OS04G0304200,OS01G0106700,OS03G0108800,OS04G0616300,OS07G0621500,OS02G0141300,OS02G0241600,OS06G0663900,OS04G0616500,OS11G0648100,OS08G0103000,OS03G0827700,OS10G0103800,OS08G0398000,OS01G0120300,OS07G0668…
GO:MF	protein kinase activity	GO:0004672	0.030358992550337464	1650	184	32	19516	OS10G0180800,OS05G0231100,OS02G0153100,OS08G0203700,OS01G0816600,OS11G0586001,OS11G0609500,OS04G0503200,OS05G0258400,OS12G0210400,OS12G0611100,OS04G0304200,OS01G0106700,OS03G0108800,OS04G0616300,OS02G0241600,OS06G0663900,OS04G0616500,OS08G0103000,OS10G0362300,OS07G0668900,OS01G0748600,OS02G0190500,OS01G0923700,OS11G0194900,OS07G0602700,OS03G0127700,OS05G0256500,OS04G0437600,OS04G0672100,OS11G0607…
GO:MF	drug binding	GO:0008144	0.031197292059449187	2944	184	48	19516	OS10G0180800,OS05G0231100,OS02G0153100,OS02G0257300,OS03G0352450,OS08G0203700,OS01G0816600,OS11G0586001,OS11G0609500,OS04G0503200,OS11G0689400,OS01G0777700,OS05G0258400,OS12G0210400,OS12G0611100,OS03G0108600,OS04G0304200,OS01G0106700,OS03G0108800,OS04G0616300,OS07G0621500,OS02G0141300,OS02G0241600,OS06G0663900,OS04G0616500,OS11G0648100,OS08G0103000,OS03G0827700,OS10G0103800,OS08G0398000,OS01G0120…
GO:MF	purine ribonucleoside triphosphate binding	GO:0035639	0.03987858795066315	2973	184	48	19516	OS10G0180800,OS05G0231100,OS02G0153100,OS03G0352450,OS08G0203700,OS01G0816600,OS11G0586001,OS11G0609500,OS04G0503200,OS11G0689400,OS01G0777700,OS05G0258400,OS12G0210400,OS12G0611100,OS03G0108600,OS04G0304200,OS01G0106700,OS03G0108800,OS04G0616300,OS07G0621500,OS02G0141300,OS02G0241600,OS06G0663900,OS04G0616500,OS11G0648100,OS08G0103000,OS03G0827700,OS10G0103800,OS08G0398000,OS01G0120300,OS07G0668…
GO:BP	phosphorylation	GO:0016310	0.00018849911244992037	2169	162	43	18096	OS10G0180800,OS05G0231100,OS02G0153100,OS08G0203700,OS01G0816600,OS11G0586001,OS11G0609500,OS04G0503200,OS01G0777700,OS01G0851000,OS05G0258400,OS12G0210400,OS12G0611100,OS01G0782200,OS04G0304200,OS01G0106700,OS03G0108800,OS04G0616300,OS02G0141300,OS02G0241600,OS05G0398000,OS06G0663900,OS04G0616500,OS08G0103000,OS10G0103800,OS10G0362300,OS07G0668900,OS01G0748600,OS02G0190500,OS01G0923700,OS11G0194…
GO:BP	phosphate-containing compound metabolic process	GO:0006796	0.00023041232118169676	2926	162	52	18096	OS10G0180800,OS05G0231100,OS02G0153100,OS08G0203700,OS01G0816600,OS11G0586001,OS11G0609500,OS04G0503200,OS01G0777700,OS01G0851000,OS05G0258400,OS12G0210400,OS12G0611100,OS01G0782200,OS09G0394600,OS04G0304200,OS02G0606900,OS01G0106700,OS03G0108800,OS07G0175900,OS04G0616300,OS02G0141300,OS02G0241600,OS02G0794900,OS05G0398000,OS06G0663900,OS04G0616500,OS05G0517200,OS08G0103000,OS10G0103800,OS10G0362…
GO:BP	phosphorus metabolic process	GO:0006793	0.000322110790080843	2957	162	52	18096	OS10G0180800,OS05G0231100,OS02G0153100,OS08G0203700,OS01G0816600,OS11G0586001,OS11G0609500,OS04G0503200,OS01G0777700,OS01G0851000,OS05G0258400,OS12G0210400,OS12G0611100,OS01G0782200,OS09G0394600,OS04G0304200,OS02G0606900,OS01G0106700,OS03G0108800,OS07G0175900,OS04G0616300,OS02G0141300,OS02G0241600,OS02G0794900,OS05G0398000,OS06G0663900,OS04G0616500,OS05G0517200,OS08G0103000,OS10G0103800,OS10G0362…
GO:BP	negative regulation of ion transport	GO:0043271	0.00044021529682820225	3	162	3	18096	OS04G0304200,OS10G0362300,OS01G0923700
GO:BP	negative regulation of transport	GO:0051051	0.00434432696564903	5	162	3	18096	OS04G0304200,OS10G0362300,OS01G0923700
GO:BP	protein phosphorylation	GO:0006468	0.004960468146592847	1722	162	34	18096	OS10G0180800,OS05G0231100,OS02G0153100,OS08G0203700,OS01G0816600,OS11G0586001,OS11G0609500,OS04G0503200,OS05G0258400,OS12G0210400,OS12G0611100,OS04G0304200,OS01G0106700,OS03G0108800,OS04G0616300,OS02G0241600,OS05G0398000,OS06G0663900,OS04G0616500,OS08G0103000,OS10G0362300,OS07G0668900,OS01G0748600,OS02G0190500,OS01G0923700,OS11G0194900,OS07G0602700,OS03G0127700,OS05G0256500,OS04G0437600,OS04G0672…
GO:BP	regulation of chlorophyll catabolic process	GO:0010271	0.04978284738005938	2	162	2	18096	OS10G0362300,OS01G0923700
GO:BP	regulation of iron ion transport	GO:0034756	0.04978284738005938	2	162	2	18096	OS10G0362300,OS01G0923700
GO:BP	negative regulation of iron ion transport	GO:0034757	0.04978284738005938	2	162	2	18096	OS10G0362300,OS01G0923700
GO:BP	secondary growth	GO:0080117	0.04978284738005938	2	162	2	18096	OS10G0362300,OS01G0923700
GO:BP	lateral growth	GO:0080190	0.04978284738005938	2	162	2	18096	OS10G0362300,OS01G0923700
GO:BP	regulation of tetrapyrrole catabolic process	GO:1901404	0.04978284738005938	2	162	2	18096	OS10G0362300,OS01G0923700

## Sheet: Pk only
source	term_name	term_id	adjusted_p_value	term_size	query_size	intersection_size	effective_domain_size	intersections
GO:MF	molecular_function	GO:0003674	0.0022089112340042383	17727	117	77	38866	OS05G0213100,OS07G0575000,OS03G0234000,OS03G0759600,OS09G0325700,OS04G0630400,OS11G0289700,OS02G0306401,OS07G0484200,OS07G0445800,OS11G0102200,OS10G0536600,OS12G0101800,OS07G0588400,OS02G0280200,OS07G0258400,OS06G0335975,OS01G0202800,OS09G0321200,OS02G0234450,OS06G0671000,OS04G0555700,OS09G0429000,OS12G0605200,OS02G0727300,OS03G0256800,OS02G0597700,OS10G0521500,OS03G0183800,OS09G0567500,OS01G0695…
GO:MF	actin binding	GO:0003779	0.021492282115716896	75	117	4	38866	OS07G0484200,OS04G0555700,OS12G0605200,OS02G0663800
GO:BP	biological_process	GO:0008150	0.00009622164220443615	15028	117	73	38866	OS05G0213100,OS07G0575000,OS07G0449700,OS03G0759600,OS09G0325700,OS04G0630400,OS11G0289700,OS02G0306401,OS07G0484200,OS07G0445800,OS11G0102200,OS10G0536600,OS12G0101800,OS07G0588400,OS02G0280200,OS07G0258400,OS06G0335975,OS01G0202800,OS09G0321200,OS02G0234450,OS06G0671000,OS04G0555700,OS09G0429000,OS02G0727300,OS03G0256800,OS03G0183800,OS09G0567500,OS01G0695700,OS07G0638600,OS06G0114200,OS10G0577…
GO:BP	actin filament depolymerization	GO:0030042	0.011661336743769351	18	117	3	38866	OS07G0484200,OS04G0555700,OS02G0663800
GO:BP	metabolic process	GO:0008152	0.017790086618350756	11320	117	55	38866	OS05G0213100,OS07G0575000,OS03G0759600,OS09G0325700,OS04G0630400,OS11G0289700,OS02G0306401,OS11G0102200,OS10G0536600,OS12G0101800,OS07G0588400,OS02G0280200,OS06G0335975,OS09G0321200,OS02G0234450,OS02G0727300,OS03G0183800,OS09G0567500,OS07G0638600,OS10G0577100,OS07G0618400,OS08G0446200,OS10G0530200,OS12G0448900,OS02G0136900,OS01G0227200,OS02G0817900,OS09G0127300,OS12G0170400,OS03G0399532,OS07G0691…
GO:BP	organic substance metabolic process	GO:0071704	0.0221352808641567	9664	117	49	38866	OS07G0575000,OS03G0759600,OS09G0325700,OS11G0289700,OS02G0306401,OS11G0102200,OS12G0101800,OS07G0588400,OS02G0280200,OS06G0335975,OS09G0321200,OS02G0234450,OS02G0727300,OS03G0183800,OS09G0567500,OS10G0577100,OS07G0618400,OS08G0446200,OS10G0530200,OS12G0448900,OS02G0136900,OS01G0227200,OS02G0817900,OS12G0170400,OS03G0399532,OS07G0691200,OS03G0165300,OS10G0483500,OS12G0618600,OS09G0315700,OS11G0232…
GO:BP	cellular process	GO:0009987	0.03075426012424455	11230	117	54	38866	OS07G0575000,OS07G0449700,OS03G0759600,OS09G0325700,OS02G0306401,OS07G0484200,OS07G0445800,OS11G0102200,OS10G0536600,OS12G0101800,OS07G0588400,OS09G0321200,OS02G0234450,OS04G0555700,OS09G0429000,OS02G0727300,OS03G0256800,OS03G0183800,OS09G0567500,OS07G0638600,OS10G0577100,OS07G0618400,OS02G0663800,OS08G0446200,OS10G0530200,OS12G0448900,OS02G0136900,OS01G0227200,OS02G0817900,OS02G0830300,OS12G0170…
GO:BP	protein depolymerization	GO:0051261	0.0457994928401414	28	117	3	38866	OS07G0484200,OS04G0555700,OS02G0663800
GO:CC	CCAAT-binding factor complex	GO:0016602	0.016798263817272972	6	117	2	38866	OS03G0411100,OS03G0696300
GO:CC	actin cytoskeleton	GO:0015629	0.04916980307427356	47	117	3	38866	OS07G0484200,OS04G0555700,OS02G0663800

## Sheet: Bv only
No significant terms

## Sheet: BvPsJN
source	term_name	term_id	adjusted_p_value	term_size	query_size	intersection_size	effective_domain_size	intersections
GO:MF	iron chelate transmembrane transporter activity	GO:0015603	0.03618920267042012	5	70	2	19516	OS02G0650300,OS04G0542800
GO:MF	iron-nicotianamine transmembrane transporter activity	GO:0051980	0.03618920267042012	5	70	2	19516	OS02G0650300,OS04G0542800
GO:BP	cellular response to organic substance	GO:0071310	0.005980714924896418	478	67	10	18096	OS12G0139400,OS11G0143300,OS08G0374000,OS09G0545300,OS02G0830200,OS02G0639800,OS12G0586100,OS02G0164900,OS04G0691100,OS07G0495900
GO:BP	hormone-mediated signaling pathway	GO:0009755	0.00692908997068181	383	67	9	18096	OS12G0139400,OS11G0143300,OS08G0374000,OS09G0545300,OS02G0830200,OS12G0586100,OS02G0164900,OS04G0691100,OS07G0495900
GO:BP	cellular response to hormone stimulus	GO:0032870	0.011449123186823049	408	67	9	18096	OS12G0139400,OS11G0143300,OS08G0374000,OS09G0545300,OS02G0830200,OS12G0586100,OS02G0164900,OS04G0691100,OS07G0495900
GO:BP	cellular response to endogenous stimulus	GO:0071495	0.013599322791836612	417	67	9	18096	OS12G0139400,OS11G0143300,OS08G0374000,OS09G0545300,OS02G0830200,OS12G0586100,OS02G0164900,OS04G0691100,OS07G0495900
KEGG	Plant hormone signal transduction	KEGG:04075	0.0003336072000843989	180	17	7	3410	OS12G0139400,OS11G0143300,OS12G0610200,OS02G0830200,OS01G0859500,OS12G0586100,OS04G0691100

## Sheet: PkPsJN
No significant terms

## Sheet: PsJNPkBv
No significant terms
