# Supplementary material for: Paraburkholderia phytofirmans PsJN colonization of rice endosphere triggers an atypical transcriptomic response compared to rice native Burkholderia s.l. endophytes
Source: Sci Rep. 2023 Jul 3;13:10696. doi: 10.1038/s41598-023-37314-7 (PMC10317989; doi:10.1038/s41598-023-37314-7)
Supplement: Supplementary file 14 — Supplementary Table S8. [file 41598_2023_37314_MOESM14_ESM.xlsx]

## Sheet: PsJNPkBv
Supplementary Table S8: Gene Ontology (GO) terms and Kyoto Encyclopedia of Genes and Genomes (KEGG) pathway enrichment analysis on the different pool of DEGs shared or not among the response to the three endophytic species (as indicated by the label of each sheet)
source	term_name	term_id	adjusted_p_value	term_size	query_size	intersection_size	effective_domain_size	intersections
GO:MF	dioxygenase activity	GO:0051213	1.371593036950744e-7	181	86	11	19516	OS09G0471000,OS03G0655100,OS04G0345800,OS05G0560900,OS10G0419400,OS03G0122300,OS05G0158600,OS01G0185500,OS03G0803500,OS01G0667200,OS12G0623600
GO:MF	oxidoreductase activity, acting on single donors with incorporation of molecular oxygen, incorporation of two atoms of oxygen	GO:0016702	0.000001772755287142661	57	86	7	19516	OS09G0471000,OS03G0655100,OS04G0345800,OS10G0419400,OS01G0185500,OS01G0667200,OS12G0623600
GO:MF	oxidoreductase activity, acting on single donors with incorporation of molecular oxygen	GO:0016701	0.00000625154928073967	68	86	7	19516	OS09G0471000,OS03G0655100,OS04G0345800,OS10G0419400,OS01G0185500,OS01G0667200,OS12G0623600
GO:MF	oxidoreductase activity	GO:0016491	0.000012256270957477776	1953	86	27	19516	OS06G0104900,OS02G0808800,OS09G0471000,OS02G0811800,OS03G0655100,OS01G0127000,OS04G0345800,OS05G0560900,OS10G0419400,OS07G0190800,OS03G0122300,OS05G0158600,OS03G0369000,OS01G0185500,OS09G0441400,OS03G0803500,OS04G0447700,OS03G0405900,OS03G0405500,OS01G0194600,OS01G0667200,OS01G0847700,OS01G0266500,OS12G0623600,OS04G0674400,OS01G0528800,OS03G0219200
GO:MF	2-oxoglutarate-dependent dioxygenase activity	GO:0016706	0.008183764161681243	39	86	4	19516	OS05G0560900,OS03G0122300,OS05G0158600,OS03G0803500
GO:MF	pyruvate decarboxylase activity	GO:0004737	0.03646563769312167	4	86	2	19516	OS05G0469600,OS05G0469800
GO:MF	acireductone dioxygenase [iron(II)-requiring] activity	GO:0010309	0.03646563769312167	4	86	2	19516	OS04G0345800,OS10G0419400
GO:BP	oxidation-reduction process	GO:0055114	0.0000031300795761758156	2101	78	29	18096	OS06G0104900,OS02G0808800,OS09G0471000,OS02G0811800,OS03G0655100,OS01G0127000,OS04G0345800,OS01G0895200,OS05G0560900,OS01G0895300,OS10G0419400,OS07G0190800,OS03G0122300,OS05G0158600,OS03G0369000,OS01G0185500,OS09G0441400,OS03G0803500,OS04G0447700,OS03G0405900,OS03G0405500,OS01G0194600,OS01G0667200,OS01G0847700,OS01G0266500,OS12G0623600,OS04G0674400,OS01G0528800,OS03G0219200
KEGG	Glycolysis / Gluconeogenesis	KEGG:00010	0.03227695518581518	110	26	5	3410	OS05G0469600,OS06G0104900,OS05G0469800,OS10G0204400,OS01G0147900

## Sheet: PkPsJN
source	term_name	term_id	adjusted_p_value	term_size	query_size	intersection_size	effective_domain_size	intersections
GO:MF	chitin binding	GO:0008061	0.008072049580496048	49	26	3	19516	OS11G0701800,OS08G0518900,OS11G0700900
GO:MF	chitinase activity	GO:0004568	0.009656969899269584	52	26	3	19516	OS11G0701800,OS08G0518900,OS11G0700900
GO:BP	aminoglycan catabolic process	GO:0006026	0.022544560318411563	50	25	3	18096	OS11G0701800,OS08G0518900,OS11G0700900
GO:BP	chitin metabolic process	GO:0006030	0.022544560318411563	50	25	3	18096	OS11G0701800,OS08G0518900,OS11G0700900
GO:BP	chitin catabolic process	GO:0006032	0.022544560318411563	50	25	3	18096	OS11G0701800,OS08G0518900,OS11G0700900
GO:BP	amino sugar catabolic process	GO:0046348	0.022544560318411563	50	25	3	18096	OS11G0701800,OS08G0518900,OS11G0700900
GO:BP	glucosamine-containing compound catabolic process	GO:1901072	0.022544560318411563	50	25	3	18096	OS11G0701800,OS08G0518900,OS11G0700900
GO:BP	glucosamine-containing compound metabolic process	GO:1901071	0.03171053145657873	56	25	3	18096	OS11G0701800,OS08G0518900,OS11G0700900
GO:BP	aminoglycan metabolic process	GO:0006022	0.03523369379593765	58	25	3	18096	OS11G0701800,OS08G0518900,OS11G0700900
GO:CC	extracellular region	GO:0005576	0.032364022564000575	734	25	6	18385	OS11G0701800,OS07G0129300,OS08G0518900,OS07G0127500,OS11G0700900,OS01G0795400
KEGG	Amino sugar and nucleotide sugar metabolism	KEGG:00520	0.02793330020179947	121	7	3	3410	OS11G0701800,OS08G0518900,OS11G0700900

## Sheet: BvPsJN
source	term_name	term_id	adjusted_p_value	term_size	query_size	intersection_size	effective_domain_size	intersections
GO:MF	transcription corepressor activity	GO:0003714	0.000016193428885054447	31	125	6	19516	OS03G0180800,OS03G0181100,OS10G0392400,OS07G0153000,OS03G0180900,OS03G0402800
GO:MF	transcription regulator activity	GO:0140110	0.0013321953646330922	1053	125	21	19516	OS03G0180800,OS03G0335200,OS06G0649000,OS02G0767800,OS08G0360300,OS01G0821600,OS03G0181100,OS11G0664800,OS02G0624300,OS02G0181300,OS12G0116700,OS10G0392400,OS05G0478700,OS09G0526600,OS07G0153000,OS03G0180900,OS05G0183100,OS09G0334500,OS03G0402800,OS03G0388500,OS10G0419300
GO:MF	transcription coregulator activity	GO:0003712	0.016317456811198287	98	125	6	19516	OS03G0180800,OS03G0181100,OS10G0392400,OS07G0153000,OS03G0180900,OS03G0402800
GO:MF	protein phosphatase binding	GO:0019903	0.02868929274792021	13	125	3	19516	OS11G0462500,OS09G0517200,OS09G0517100
GO:MF	phosphatase binding	GO:0019902	0.03634289688585801	14	125	3	19516	OS11G0462500,OS09G0517200,OS09G0517100
GO:MF	ADP binding	GO:0043531	0.03819645785799179	502	125	12	19516	OS06G0279900,OS04G0375300,OS11G0462500,OS10G0161400,OS09G0517200,OS04G0514600,OS09G0517100,OS06G0668200,OS11G0689100,OS09G0334500,OS02G0597300,OS11G0266500
GO:BP	regulation of defense response	GO:0031347	4.9148402300926666e-8	100	120	11	18096	OS03G0180800,OS06G0649000,OS03G0181100,OS02G0181300,OS10G0392400,OS07G0153000,OS03G0180900,OS11G0195500,OS03G0402800,OS08G0159500,OS03G0438100
GO:BP	regulation of jasmonic acid mediated signaling pathway	GO:2000022	8.84037644368186e-8	23	120	7	18096	OS03G0180800,OS03G0181100,OS10G0392400,OS07G0153000,OS03G0180900,OS11G0195500,OS03G0402800
GO:BP	response to wounding	GO:0009611	2.3032389394874893e-7	62	120	9	18096	OS03G0180800,OS03G0181100,OS02G0181300,OS10G0392400,OS07G0153000,OS03G0180900,OS04G0119500,OS03G0402800,OS03G0438100
GO:BP	jasmonic acid mediated signaling pathway	GO:0009867	5.202890828449465e-7	46	120	8	18096	OS03G0180800,OS03G0181100,OS10G0392400,OS07G0153000,OS03G0180900,OS11G0195500,OS03G0402800,OS03G0438100
GO:BP	response to jasmonic acid	GO:0009753	5.412212404317282e-7	68	120	9	18096	OS03G0180800,OS03G0181100,OS02G0181300,OS10G0392400,OS07G0153000,OS03G0180900,OS11G0195500,OS03G0402800,OS03G0438100
GO:BP	cellular response to jasmonic acid stimulus	GO:0071395	8.844768900497439e-7	49	120	8	18096	OS03G0180800,OS03G0181100,OS10G0392400,OS07G0153000,OS03G0180900,OS11G0195500,OS03G0402800,OS03G0438100
GO:BP	regulation of response to stress	GO:0080134	0.000024781828428503587	179	120	11	18096	OS03G0180800,OS06G0649000,OS03G0181100,OS02G0181300,OS10G0392400,OS07G0153000,OS03G0180900,OS11G0195500,OS03G0402800,OS08G0159500,OS03G0438100
GO:BP	defense response	GO:0006952	0.00003733142379202276	785	120	21	18096	OS06G0279900,OS04G0375300,OS03G0180800,OS06G0649000,OS11G0462500,OS03G0181100,OS10G0161400,OS02G0181300,OS11G0592000,OS10G0392400,OS07G0153000,OS03G0180900,OS11G0195500,OS04G0685400,OS11G0689100,OS01G0841700,OS03G0402800,OS08G0159500,OS11G0266500,OS03G0438100,OS02G0562600
GO:BP	response to stress	GO:0006950	0.00017521175485464799	2129	120	35	18096	OS06G0279900,OS04G0375300,OS03G0180800,OS06G0649000,OS11G0462500,OS03G0741100,OS08G0360300,OS03G0181100,OS11G0664800,OS02G0624300,OS10G0161400,OS02G0181300,OS11G0592000,OS10G0392400,OS09G0526600,OS07G0153000,OS06G0546500,OS03G0180900,OS02G0661100,OS01G0840100,OS11G0195500,OS04G0685400,OS06G0668200,OS04G0119500,OS11G0689100,OS01G0841700,OS03G0402800,OS08G0159500,OS03G0113700,OS08G0500700,OS11G0266…
GO:BP	regulation of signaling	GO:0023051	0.00021381785291563522	175	120	10	18096	OS03G0180800,OS03G0181100,OS02G0181300,OS10G0392400,OS07G0153000,OS03G0180900,OS07G0569100,OS01G0802700,OS11G0195500,OS03G0402800
GO:BP	regulation of signal transduction	GO:0009966	0.00021381785291563522	175	120	10	18096	OS03G0180800,OS03G0181100,OS02G0181300,OS10G0392400,OS07G0153000,OS03G0180900,OS07G0569100,OS01G0802700,OS11G0195500,OS03G0402800
GO:BP	regulation of cell communication	GO:0010646	0.00023762332743246006	177	120	10	18096	OS03G0180800,OS03G0181100,OS02G0181300,OS10G0392400,OS07G0153000,OS03G0180900,OS07G0569100,OS01G0802700,OS11G0195500,OS03G0402800
GO:BP	response to stimulus	GO:0050896	0.000546800006826546	4050	120	51	18096	OS06G0279900,OS04G0375300,OS03G0180800,OS06G0649000,OS11G0462500,OS03G0741100,OS08G0360300,OS03G0181100,OS11G0144900,OS11G0664800,OS02G0624300,OS05G0555600,OS10G0161400,OS02G0181300,OS11G0592000,OS04G0371200,OS10G0392400,OS09G0526600,OS07G0153000,OS09G0517200,OS11G0670900,OS06G0546500,OS03G0180900,OS07G0569100,OS01G0802700,OS02G0661100,OS01G0840100,OS07G0194100,OS11G0195500,OS04G0685400,OS09G0517…
GO:BP	regulation of response to stimulus	GO:0048583	0.0007251662347308676	363	120	13	18096	OS03G0180800,OS06G0649000,OS03G0181100,OS02G0181300,OS10G0392400,OS07G0153000,OS03G0180900,OS07G0569100,OS01G0802700,OS11G0195500,OS03G0402800,OS08G0159500,OS03G0438100
GO:BP	signal transduction	GO:0007165	0.0011672290392096434	1792	120	30	18096	OS06G0279900,OS04G0375300,OS03G0180800,OS11G0462500,OS03G0181100,OS11G0144900,OS10G0161400,OS02G0181300,OS04G0371200,OS10G0392400,OS07G0153000,OS09G0517200,OS11G0670900,OS03G0180900,OS07G0569100,OS01G0802700,OS07G0194100,OS11G0195500,OS04G0685400,OS09G0517100,OS01G0765600,OS11G0689100,OS08G0501500,OS02G0597300,OS03G0402800,OS06G0541600,OS06G0296700,OS11G0266500,OS03G0438100,OS04G0599000
GO:BP	signaling	GO:0023052	0.0012953787798124226	1801	120	30	18096	OS06G0279900,OS04G0375300,OS03G0180800,OS11G0462500,OS03G0181100,OS11G0144900,OS10G0161400,OS02G0181300,OS04G0371200,OS10G0392400,OS07G0153000,OS09G0517200,OS11G0670900,OS03G0180900,OS07G0569100,OS01G0802700,OS07G0194100,OS11G0195500,OS04G0685400,OS09G0517100,OS01G0765600,OS11G0689100,OS08G0501500,OS02G0597300,OS03G0402800,OS06G0541600,OS06G0296700,OS11G0266500,OS03G0438100,OS04G0599000
GO:BP	cellular response to acid chemical	GO:0071229	0.00337311953616196	237	120	10	18096	OS03G0180800,OS03G0181100,OS02G0181300,OS10G0392400,OS07G0153000,OS03G0180900,OS07G0569100,OS11G0195500,OS03G0402800,OS03G0438100
GO:BP	regulation of cellular process	GO:0050794	0.004557662295216692	4717	120	54	18096	OS06G0279900,OS04G0375300,OS03G0180800,OS03G0335200,OS06G0649000,OS11G0462500,OS03G0741100,OS02G0767800,OS08G0360300,OS01G0821600,OS03G0181100,OS11G0144900,OS11G0664800,OS04G0387300,OS11G0154500,OS04G0684900,OS02G0624300,OS10G0161400,OS02G0181300,OS04G0371200,OS12G0116700,OS10G0392400,OS09G0455300,OS05G0478700,OS09G0526600,OS07G0153000,OS09G0517200,OS11G0670900,OS03G0180900,OS07G0569100,OS05G0183…
GO:BP	cellular response to stimulus	GO:0051716	0.007453348647247202	2723	120	37	18096	OS06G0279900,OS04G0375300,OS03G0180800,OS11G0462500,OS03G0181100,OS11G0144900,OS10G0161400,OS02G0181300,OS04G0371200,OS10G0392400,OS09G0526600,OS07G0153000,OS09G0517200,OS11G0670900,OS06G0546500,OS03G0180900,OS07G0569100,OS01G0802700,OS01G0840100,OS07G0194100,OS11G0195500,OS04G0685400,OS09G0517100,OS01G0765600,OS11G0689100,OS08G0501500,OS02G0597300,OS03G0402800,OS08G0159500,OS03G0113700,OS06G0541…
GO:BP	cell communication	GO:0007154	0.007986543669396898	1970	120	30	18096	OS06G0279900,OS04G0375300,OS03G0180800,OS11G0462500,OS03G0181100,OS11G0144900,OS10G0161400,OS02G0181300,OS04G0371200,OS10G0392400,OS07G0153000,OS09G0517200,OS11G0670900,OS03G0180900,OS07G0569100,OS01G0802700,OS07G0194100,OS11G0195500,OS04G0685400,OS09G0517100,OS01G0765600,OS11G0689100,OS08G0501500,OS02G0597300,OS03G0402800,OS06G0541600,OS06G0296700,OS11G0266500,OS03G0438100,OS04G0599000
GO:BP	biological regulation	GO:0065007	0.0092611493644356	5895	120	62	18096	OS06G0279900,OS04G0375300,OS03G0180800,OS03G0335200,OS06G0649000,OS02G0584800,OS04G0469000,OS11G0462500,OS03G0741100,OS02G0767800,OS08G0360300,OS01G0821600,OS03G0181100,OS11G0144900,OS02G0585200,OS11G0664800,OS05G0591600,OS04G0387300,OS11G0154500,OS04G0684900,OS02G0624300,OS05G0555600,OS10G0161400,OS02G0585100,OS02G0181300,OS04G0371200,OS12G0116700,OS10G0392400,OS09G0455300,OS05G0478700,OS09G0526…
GO:BP	cellular response to organic substance	GO:0071310	0.014451643065877049	478	120	13	18096	OS03G0180800,OS03G0181100,OS02G0181300,OS10G0392400,OS07G0153000,OS03G0180900,OS07G0569100,OS01G0802700,OS01G0840100,OS11G0195500,OS03G0402800,OS03G0113700,OS03G0438100
GO:BP	negative regulation of RNA biosynthetic process	GO:1902679	0.029237059577519712	187	120	8	18096	OS03G0180800,OS06G0649000,OS03G0181100,OS02G0181300,OS10G0392400,OS07G0153000,OS03G0180900,OS03G0402800
GO:BP	negative regulation of nucleic acid-templated transcription	GO:1903507	0.029237059577519712	187	120	8	18096	OS03G0180800,OS06G0649000,OS03G0181100,OS02G0181300,OS10G0392400,OS07G0153000,OS03G0180900,OS03G0402800
GO:BP	negative regulation of RNA metabolic process	GO:0051253	0.03398797685419361	191	120	8	18096	OS03G0180800,OS06G0649000,OS03G0181100,OS02G0181300,OS10G0392400,OS07G0153000,OS03G0180900,OS03G0402800
GO:BP	positive regulation of defense response to insect	GO:1900367	0.03634174580616251	2	120	2	18096	OS11G0195500,OS03G0438100
GO:BP	cellular response to heat	GO:0034605	0.04010664380032084	60	120	5	18096	OS09G0526600,OS01G0840100,OS03G0113700,OS08G0500700,OS10G0419300
GO:BP	hormone-mediated signaling pathway	GO:0009755	0.04068076108234361	383	120	11	18096	OS03G0180800,OS03G0181100,OS02G0181300,OS10G0392400,OS07G0153000,OS03G0180900,OS07G0569100,OS01G0802700,OS11G0195500,OS03G0402800,OS03G0438100
GO:BP	negative regulation of nucleobase-containing compound metabolic process	GO:0045934	0.04707338799156632	200	120	8	18096	OS03G0180800,OS06G0649000,OS03G0181100,OS02G0181300,OS10G0392400,OS07G0153000,OS03G0180900,OS03G0402800

## Sheet: PsJN only
source	term_name	term_id	adjusted_p_value	term_size	query_size	intersection_size	effective_domain_size	intersections
GO:CC	intrinsic component of plasma membrane	GO:0031226	0.012697418429932314	443	152	13	18385	OS07G0448200,OS07G0105000,OS12G0159000,OS04G0574200,OS07G0250900,OS08G0321000,OS09G0248100,OS04G0685300,OS07G0448800,OS03G0758500,OS03G0363600,OS02G0734900,OS12G0641400
GO:CC	extracellular region	GO:0005576	0.01921946493049377	734	152	17	18385	OS04G0347200,OS01G0660200,OS01G0687400,OS03G0234900,OS08G0237000,OS03G0186900,OS07G0568700,OS03G0121300,OS03G0429000,OS04G0656800,OS02G0236600,OS07G0637700,OS11G0178800,OS07G0636800,OS03G0661300,OS11G0557000,OS09G0442300
GO:CC	anchored component of plasma membrane	GO:0046658	0.023159676966512926	184	152	8	18385	OS07G0105000,OS12G0159000,OS04G0574200,OS07G0250900,OS08G0321000,OS09G0248100,OS04G0685300,OS03G0758500
GO:CC	anchored component of membrane	GO:0031225	0.031000150592958336	192	152	8	18385	OS07G0105000,OS12G0159000,OS04G0574200,OS07G0250900,OS08G0321000,OS09G0248100,OS04G0685300,OS03G0758500

## Sheet: Pk only
source	term_name	term_id	adjusted_p_value	term_size	query_size	intersection_size	effective_domain_size	intersections
GO:MF	peroxidase activity	GO:0004601	8.94951312796501e-8	178	125	10	38866	OS01G0963000,OS03G0235000,OS10G0109300,OS07G0677200,OS06G0521500,OS01G0327400,OS04G0688100,OS02G0753800,OS06G0221200,OS07G0677300
GO:MF	oxidoreductase activity, acting on peroxide as acceptor	GO:0016684	9.453564904500002e-8	179	125	10	38866	OS01G0963000,OS03G0235000,OS10G0109300,OS07G0677200,OS06G0521500,OS01G0327400,OS04G0688100,OS02G0753800,OS06G0221200,OS07G0677300
GO:MF	antioxidant activity	GO:0016209	3.3725292890878526e-7	204	125	10	38866	OS01G0963000,OS03G0235000,OS10G0109300,OS07G0677200,OS06G0521500,OS01G0327400,OS04G0688100,OS02G0753800,OS06G0221200,OS07G0677300
GO:MF	oxidoreductase activity	GO:0016491	3.689054055553653e-7	1739	125	24	38866	OS02G0811400,OS01G0963000,OS08G0509100,OS03G0235000,OS04G0578400,OS04G0581000,OS10G0109300,OS01G0627500,OS03G0618300,OS01G0757200,OS12G0258700,OS03G0760200,OS07G0677200,OS06G0521500,OS01G0667900,OS01G0327400,OS04G0688100,OS02G0753800,OS06G0215600,OS06G0221200,OS01G0865100,OS07G0677300,OS05G0420600,OS06G0142700
GO:MF	catalytic activity	GO:0003824	0.000010550815605112	9355	125	58	38866	OS11G0701000,OS02G0811400,OS11G0607900,OS01G0963000,OS04G0659300,OS11G0514500,OS01G0597800,OS09G0243200,OS08G0509100,OS01G0940700,OS12G0486900,OS03G0235000,OS02G0605900,OS01G0947000,OS10G0531400,OS01G0347600,OS04G0578400,OS04G0581000,OS10G0109300,OS01G0627500,OS01G0813800,OS01G0935800,OS10G0528400,OS04G0140400,OS03G0618300,OS07G0689600,OS11G0225000,OS08G0203201,OS01G0946700,OS01G0757200,OS07G0537…
GO:MF	metal ion binding	GO:0046872	0.00003270799755039575	2726	125	27	38866	OS01G0963000,OS08G0509100,OS03G0226200,OS09G0483500,OS04G0578400,OS04G0581000,OS10G0109300,OS01G0627500,OS03G0618300,OS01G0249700,OS01G0757200,OS12G0258700,OS03G0760200,OS07G0681400,OS07G0677200,OS06G0521500,OS01G0667900,OS01G0327400,OS11G0474800,OS04G0598800,OS07G0673200,OS08G0189600,OS04G0688100,OS02G0753800,OS06G0221200,OS07G0677300,OS05G0420600
GO:MF	cation binding	GO:0043169	0.000038714542975658646	2749	125	27	38866	OS01G0963000,OS08G0509100,OS03G0226200,OS09G0483500,OS04G0578400,OS04G0581000,OS10G0109300,OS01G0627500,OS03G0618300,OS01G0249700,OS01G0757200,OS12G0258700,OS03G0760200,OS07G0681400,OS07G0677200,OS06G0521500,OS01G0667900,OS01G0327400,OS11G0474800,OS04G0598800,OS07G0673200,OS08G0189600,OS04G0688100,OS02G0753800,OS06G0221200,OS07G0677300,OS05G0420600
GO:MF	heme binding	GO:0020037	0.00004727803255983308	538	125	12	38866	OS01G0963000,OS03G0226200,OS03G0235000,OS10G0109300,OS01G0627500,OS03G0760200,OS07G0677200,OS06G0521500,OS01G0327400,OS04G0688100,OS07G0677300,OS05G0420600
GO:MF	tetrapyrrole binding	GO:0046906	0.00006584642015919423	555	125	12	38866	OS01G0963000,OS03G0226200,OS03G0235000,OS10G0109300,OS01G0627500,OS03G0760200,OS07G0677200,OS06G0521500,OS01G0327400,OS04G0688100,OS07G0677300,OS05G0420600
GO:MF	ion binding	GO:0043167	0.00009194906622222163	5769	125	41	38866	OS11G0607900,OS01G0963000,OS08G0509100,OS03G0226200,OS09G0483500,OS12G0486900,OS04G0578400,OS12G0555200,OS04G0581000,OS10G0109300,OS01G0627500,OS01G0935800,OS12G0555000,OS09G0357400,OS03G0618300,OS01G0249700,OS08G0556300,OS11G0225000,OS01G0757200,OS07G0537900,OS12G0258700,OS03G0760200,OS07G0681400,OS07G0677200,OS06G0521500,OS01G0667900,OS01G0327400,OS06G0548000,OS11G0474800,OS04G0598800,OS07G0673…
GO:MF	molecular_function	GO:0003674	0.00022488021321860136	17727	125	84	38866	OS11G0701000,OS02G0811400,OS11G0607900,OS01G0963000,OS04G0659300,OS11G0514500,OS01G0597800,OS09G0243200,OS08G0509100,OS01G0940700,OS03G0226200,OS09G0483500,OS12G0486900,OS03G0235000,OS02G0605900,OS01G0947000,OS10G0531400,OS01G0347600,OS04G0578400,OS12G0555200,OS04G0581000,OS02G0574000,OS10G0109300,OS10G0345100,OS09G0459900,OS01G0627500,OS01G0813800,OS01G0935800,OS10G0528400,OS12G0555000,OS04G0140…
GO:MF	cofactor binding	GO:0048037	0.000545955417849639	1226	125	16	38866	OS02G0811400,OS01G0963000,OS03G0226200,OS03G0235000,OS10G0109300,OS01G0627500,OS03G0760200,OS07G0677200,OS06G0521500,OS01G0667900,OS01G0327400,OS06G0548000,OS04G0688100,OS06G0215600,OS07G0677300,OS05G0420600
GO:MF	hydrolase activity, hydrolyzing O-glycosyl compounds	GO:0004553	0.0017661839191241936	405	125	9	38866	OS11G0701000,OS01G0940700,OS02G0605900,OS01G0947000,OS01G0813800,OS01G0946700,OS06G0106800,OS10G0370800,OS11G0704600
GO:MF	hydrolase activity, acting on glycosyl bonds	GO:0016798	0.005363773818061818	466	125	9	38866	OS11G0701000,OS01G0940700,OS02G0605900,OS01G0947000,OS01G0813800,OS01G0946700,OS06G0106800,OS10G0370800,OS11G0704600
GO:MF	abscisic acid binding	GO:0010427	0.013855957168759713	23	125	3	38866	OS12G0555200,OS12G0555000,OS03G0300400
GO:MF	isoprenoid binding	GO:0019840	0.01579819908748768	24	125	3	38866	OS12G0555200,OS12G0555000,OS03G0300400
GO:MF	lipid binding	GO:0008289	0.018782550676385484	216	125	6	38866	OS12G0555200,OS12G0555000,OS08G0556300,OS03G0300400,OS02G0753800,OS06G0221200
GO:MF	alcohol binding	GO:0043178	0.02533137728543035	28	125	3	38866	OS12G0555200,OS12G0555000,OS03G0300400
GO:MF	protein phosphatase inhibitor activity	GO:0004864	0.031246452436034387	30	125	3	38866	OS12G0555200,OS12G0555000,OS03G0300400
GO:MF	phosphatase inhibitor activity	GO:0019212	0.034513140547651526	31	125	3	38866	OS12G0555200,OS12G0555000,OS03G0300400
GO:MF	hormone binding	GO:0042562	0.049783596414956666	35	125	3	38866	OS12G0555200,OS12G0555000,OS03G0300400
GO:BP	biological_process	GO:0008150	6.115851841541095e-7	15028	125	82	38866	OS11G0701000,OS02G0811400,OS11G0607900,OS11G0701600,OS01G0963000,OS03G0130300,OS04G0659300,OS11G0514500,OS09G0243200,OS08G0509100,OS01G0940700,OS12G0486900,OS03G0235000,OS02G0605900,OS01G0947000,OS10G0531400,OS01G0347600,OS04G0578400,OS12G0555200,OS04G0581000,OS02G0574000,OS10G0109300,OS10G0345100,OS09G0459900,OS01G0627500,OS01G0813800,OS01G0935800,OS12G0555000,OS04G0140400,OS03G0618300,OS07G0689…
GO:BP	response to toxic substance	GO:0009636	6.485848681391603e-7	263	125	11	38866	OS01G0963000,OS03G0235000,OS10G0109300,OS07G0677200,OS06G0521500,OS01G0327400,OS04G0688100,OS02G0753800,OS06G0221200,OS08G0440100,OS07G0677300
GO:BP	cellular oxidant detoxification	GO:0098869	0.0000011046521021450155	210	125	10	38866	OS01G0963000,OS03G0235000,OS10G0109300,OS07G0677200,OS06G0521500,OS01G0327400,OS04G0688100,OS02G0753800,OS06G0221200,OS07G0677300
GO:BP	cellular response to toxic substance	GO:0097237	0.000001806580614566582	221	125	10	38866	OS01G0963000,OS03G0235000,OS10G0109300,OS07G0677200,OS06G0521500,OS01G0327400,OS04G0688100,OS02G0753800,OS06G0221200,OS07G0677300
GO:BP	cellular detoxification	GO:1990748	0.000001806580614566582	221	125	10	38866	OS01G0963000,OS03G0235000,OS10G0109300,OS07G0677200,OS06G0521500,OS01G0327400,OS04G0688100,OS02G0753800,OS06G0221200,OS07G0677300
GO:BP	detoxification	GO:0098754	0.0000022396612359942558	226	125	10	38866	OS01G0963000,OS03G0235000,OS10G0109300,OS07G0677200,OS06G0521500,OS01G0327400,OS04G0688100,OS02G0753800,OS06G0221200,OS07G0677300
GO:BP	antibiotic metabolic process	GO:0016999	0.000010128062186446893	196	125	9	38866	OS01G0963000,OS10G0109300,OS01G0787600,OS07G0677200,OS06G0521500,OS01G0327400,OS07G0673200,OS04G0688100,OS07G0677300
GO:BP	drug metabolic process	GO:0017144	0.000029910838844782685	474	125	12	38866	OS01G0963000,OS02G0605900,OS10G0109300,OS07G0689600,OS01G0787600,OS07G0677200,OS06G0521500,OS01G0327400,OS07G0673200,OS04G0688100,OS07G0677300,OS06G0142700
GO:BP	oxidation-reduction process	GO:0055114	0.00009031784986429359	1882	125	22	38866	OS02G0811400,OS01G0963000,OS08G0509100,OS03G0235000,OS04G0578400,OS04G0581000,OS10G0109300,OS01G0627500,OS03G0618300,OS01G0757200,OS12G0258700,OS03G0760200,OS07G0677200,OS06G0521500,OS01G0667900,OS01G0327400,OS04G0688100,OS06G0215600,OS01G0865100,OS07G0677300,OS05G0420600,OS06G0142700
GO:BP	response to chemical	GO:0042221	0.00020656517814951348	1201	125	17	38866	OS01G0963000,OS03G0235000,OS12G0555200,OS10G0109300,OS10G0345100,OS12G0555000,OS07G0677200,OS06G0521500,OS01G0327400,OS07G0673200,OS04G0688100,OS03G0300400,OS02G0753800,OS06G0221200,OS08G0440100,OS07G0677300,OS10G0573800
GO:BP	response to oxidative stress	GO:0006979	0.00021191115024721542	280	125	9	38866	OS01G0963000,OS03G0235000,OS10G0109300,OS07G0677200,OS06G0521500,OS01G0327400,OS04G0688100,OS08G0440100,OS07G0677300
GO:BP	hydrogen peroxide catabolic process	GO:0042744	0.0002253881296217508	139	125	7	38866	OS01G0963000,OS10G0109300,OS07G0677200,OS06G0521500,OS01G0327400,OS04G0688100,OS07G0677300
GO:BP	metabolic process	GO:0008152	0.0002825769967633823	11320	125	63	38866	OS11G0701000,OS02G0811400,OS11G0607900,OS11G0701600,OS01G0963000,OS04G0659300,OS11G0514500,OS09G0243200,OS08G0509100,OS01G0940700,OS12G0486900,OS03G0235000,OS02G0605900,OS01G0947000,OS10G0531400,OS01G0347600,OS04G0578400,OS12G0555200,OS04G0581000,OS10G0109300,OS09G0459900,OS01G0627500,OS01G0813800,OS01G0935800,OS12G0555000,OS03G0618300,OS07G0689600,OS11G0225000,OS08G0203201,OS01G0946700,OS01G0757…
GO:BP	hydrogen peroxide metabolic process	GO:0042743	0.0002863876622657597	144	125	7	38866	OS01G0963000,OS10G0109300,OS07G0677200,OS06G0521500,OS01G0327400,OS04G0688100,OS07G0677300
GO:BP	cellular response to chemical stimulus	GO:0070887	0.0003121551847212232	706	125	13	38866	OS01G0963000,OS03G0235000,OS12G0555200,OS10G0109300,OS12G0555000,OS07G0677200,OS06G0521500,OS01G0327400,OS04G0688100,OS03G0300400,OS02G0753800,OS06G0221200,OS07G0677300
GO:BP	antibiotic catabolic process	GO:0017001	0.0003946538836023907	151	125	7	38866	OS01G0963000,OS10G0109300,OS07G0677200,OS06G0521500,OS01G0327400,OS04G0688100,OS07G0677300
GO:BP	response to stress	GO:0006950	0.0004469641269511273	1420	125	18	38866	OS01G0963000,OS03G0130300,OS03G0235000,OS02G0605900,OS12G0555200,OS10G0109300,OS04G0140400,OS11G0591800,OS07G0677200,OS06G0521500,OS01G0327400,OS07G0673200,OS04G0688100,OS03G0300400,OS02G0753800,OS06G0221200,OS08G0440100,OS07G0677300
GO:BP	cofactor catabolic process	GO:0051187	0.0005130259427500273	157	125	7	38866	OS01G0963000,OS10G0109300,OS07G0677200,OS06G0521500,OS01G0327400,OS04G0688100,OS07G0677300
GO:BP	drug catabolic process	GO:0042737	0.0007663611497591365	241	125	8	38866	OS01G0963000,OS02G0605900,OS10G0109300,OS07G0677200,OS06G0521500,OS01G0327400,OS04G0688100,OS07G0677300
GO:BP	reactive oxygen species metabolic process	GO:0072593	0.0010605133708814812	175	125	7	38866	OS01G0963000,OS10G0109300,OS07G0677200,OS06G0521500,OS01G0327400,OS04G0688100,OS07G0677300
GO:BP	cellular process	GO:0009987	0.0012762940762211367	11230	125	61	38866	OS11G0701000,OS02G0811400,OS11G0607900,OS01G0963000,OS04G0659300,OS11G0514500,OS09G0243200,OS08G0509100,OS12G0486900,OS03G0235000,OS02G0605900,OS10G0531400,OS01G0347600,OS12G0555200,OS10G0109300,OS09G0459900,OS01G0935800,OS12G0555000,OS04G0140400,OS07G0689600,OS08G0556300,OS11G0225000,OS08G0203201,OS01G0757200,OS07G0537900,OS01G0787600,OS07G0645300,OS12G0258700,OS03G0760200,OS07G0677200,OS06G0521…
GO:BP	response to stimulus	GO:0050896	0.006914828353094348	2836	125	24	38866	OS01G0963000,OS03G0130300,OS03G0235000,OS02G0605900,OS12G0555200,OS10G0109300,OS10G0345100,OS01G0935800,OS12G0555000,OS04G0140400,OS11G0591800,OS07G0677200,OS06G0521500,OS01G0327400,OS05G0127200,OS09G0471500,OS07G0673200,OS04G0688100,OS03G0300400,OS02G0753800,OS06G0221200,OS08G0440100,OS07G0677300,OS10G0573800
GO:BP	negative regulation of phosphate metabolic process	GO:0045936	0.01651605632927472	53	125	4	38866	OS12G0555200,OS09G0459900,OS12G0555000,OS03G0300400
GO:BP	negative regulation of protein modification process	GO:0031400	0.01651605632927472	53	125	4	38866	OS12G0555200,OS09G0459900,OS12G0555000,OS03G0300400
GO:BP	negative regulation of phosphorus metabolic process	GO:0010563	0.01651605632927472	53	125	4	38866	OS12G0555200,OS09G0459900,OS12G0555000,OS03G0300400
GO:BP	cellular response to stimulus	GO:0051716	0.016946186269432287	1850	125	18	38866	OS01G0963000,OS03G0235000,OS12G0555200,OS10G0109300,OS01G0935800,OS12G0555000,OS04G0140400,OS07G0677200,OS06G0521500,OS01G0327400,OS05G0127200,OS09G0471500,OS07G0673200,OS04G0688100,OS03G0300400,OS02G0753800,OS06G0221200,OS07G0677300
GO:BP	cofactor metabolic process	GO:0051186	0.01727789530574355	482	125	9	38866	OS01G0963000,OS10G0531400,OS10G0109300,OS07G0677200,OS06G0521500,OS01G0327400,OS04G0688100,OS09G0467200,OS07G0677300
GO:BP	catabolic process	GO:0009056	0.022058316951708325	1536	125	16	38866	OS11G0701000,OS01G0963000,OS09G0243200,OS02G0605900,OS01G0347600,OS10G0109300,OS01G0757200,OS12G0258700,OS07G0677200,OS06G0521500,OS01G0868600,OS01G0327400,OS05G0127200,OS04G0688100,OS01G0865100,OS07G0677300
GO:BP	regulation of protein serine/threonine phosphatase activity	GO:0080163	0.029890620722491545	22	125	3	38866	OS12G0555200,OS12G0555000,OS03G0300400
GO:BP	cellular catabolic process	GO:0044248	0.03153710905768125	1246	125	14	38866	OS11G0701000,OS01G0963000,OS09G0243200,OS02G0605900,OS01G0347600,OS10G0109300,OS01G0757200,OS12G0258700,OS07G0677200,OS06G0521500,OS01G0327400,OS04G0688100,OS01G0865100,OS07G0677300
GO:CC	extracellular region	GO:0005576	8.95406896865305e-9	673	125	17	38866	OS11G0701000,OS01G0963000,OS12G0628600,OS07G0127700,OS01G0347600,OS10G0109300,OS12G0258700,OS07G0677200,OS06G0521500,OS01G0327400,OS06G0106800,OS08G0189600,OS01G0124200,OS04G0688100,OS02G0753800,OS06G0221200,OS07G0677300
GO:CC	cell periphery	GO:0071944	0.0001401963423511858	2289	125	23	38866	OS09G0472900,OS11G0607900,OS01G0963000,OS11G0514500,OS01G0940700,OS01G0947000,OS02G0574000,OS01G0935800,OS04G0140400,OS03G0195800,OS11G0225000,OS08G0203201,OS01G0946700,OS07G0537900,OS01G0327400,OS05G0127200,OS09G0471500,OS07G0673200,OS08G0189600,OS04G0688100,OS07G0542600,OS11G0704600,OS08G0440100
GO:CC	cellular_component	GO:0005575	0.0012287122370977384	15469	125	74	38866	OS11G0701000,OS09G0472900,OS11G0607900,OS01G0963000,OS11G0514500,OS01G0597800,OS08G0509100,OS12G0628600,OS07G0127700,OS01G0940700,OS03G0305400,OS01G0947000,OS10G0531400,OS06G0142400,OS01G0347600,OS04G0578400,OS12G0555200,OS02G0574000,OS06G0188400,OS10G0109300,OS10G0345100,OS09G0459900,OS01G0935800,OS06G0292301,OS12G0555000,OS04G0140400,OS08G0556300,OS03G0195800,OS11G0225000,OS08G0203201,OS08G0356…
GO:CC	plasma membrane	GO:0005886	0.004844220201409196	1888	125	18	38866	OS11G0607900,OS11G0514500,OS01G0940700,OS01G0947000,OS02G0574000,OS01G0935800,OS04G0140400,OS03G0195800,OS11G0225000,OS08G0203201,OS01G0946700,OS07G0537900,OS05G0127200,OS09G0471500,OS07G0673200,OS07G0542600,OS11G0704600,OS08G0440100
GO:CC	respirasome	GO:0070469	0.02418873672814516	86	125	4	38866	OS11G0112000,OS07G0673900,OS05G0420600,OS06G0142700
GO:CC	plasma membrane part	GO:0044459	0.02704978831169433	368	125	7	38866	OS01G0940700,OS01G0947000,OS02G0574000,OS03G0195800,OS01G0946700,OS11G0704600,OS08G0440100
KEGG	Metabolic pathways	KEGG:01100	0.000019442043307603314	1598	125	19	38866	OS11G0701000,OS02G0811400,OS01G0963000,OS08G0509100,OS02G0605900,OS10G0531400,OS04G0578400,OS10G0109300,OS06G0521500,OS01G0327400,OS05G0127200,OS06G0548000,OS09G0467200,OS06G0215600,OS01G0865100,OS07G0677300,OS03G0283100,OS06G0142700,OS11G0169900
KEGG	Phenylpropanoid biosynthesis	KEGG:00940	0.0002634640373492818	156	125	6	38866	OS02G0811400,OS01G0963000,OS10G0109300,OS06G0521500,OS01G0327400,OS07G0677300
KEGG	Biosynthesis of secondary metabolites	KEGG:01110	0.001900324543772221	837	125	11	38866	OS02G0811400,OS01G0963000,OS08G0509100,OS04G0578400,OS10G0109300,OS01G0757200,OS06G0521500,OS01G0327400,OS06G0548000,OS06G0215600,OS07G0677300
KEGG	KEGG root term	KEGG:00000	0.023404959614482957	3369	125	22	38866	OS11G0701000,OS02G0811400,OS01G0963000,OS08G0509100,OS02G0605900,OS10G0531400,OS04G0578400,OS10G0109300,OS01G0757200,OS07G0681400,OS06G0521500,OS01G0327400,OS05G0127200,OS06G0548000,OS09G0467200,OS02G0102900,OS06G0215600,OS01G0865100,OS07G0677300,OS03G0283100,OS06G0142700,OS11G0169900
KEGG	Glutathione metabolism	KEGG:00480	0.0421885301048155	76	125	3	38866	OS10G0531400,OS09G0467200,OS03G0283100

## Sheet: Bv only
source	term_name	term_id	adjusted_p_value	term_size	query_size	intersection_size	effective_domain_size	intersections
WP	Polar Auxin Transport	WP:WP2940	0.040375261551455655	13	123	1	38866	OS08G0529000

## Sheet: PkBv
source	term_name	term_id	adjusted_p_value	term_size	query_size	intersection_size	effective_domain_size	intersections
GO:MF	oxidoreductase activity	GO:0016491	0.0009797420625227613	1953	45	16	19516	OS04G0612700,OS08G0480400,OS06G0695200,OS02G0318100,OS06G0695300,OS07G0638400,OS07G0531400,OS12G0617400,OS04G0339400,OS11G0428800,OS06G0216300,OS12G0442800,OS07G0635500,OS03G0368300,OS11G0210500,OS02G0601300
GO:MF	peroxidase activity	GO:0004601	0.019867352618122197	190	45	5	19516	OS06G0695200,OS06G0695300,OS07G0638400,OS07G0531400,OS03G0368300
GO:MF	oxidoreductase activity, acting on peroxide as acceptor	GO:0016684	0.02036661355601939	191	45	5	19516	OS06G0695200,OS06G0695300,OS07G0638400,OS07G0531400,OS03G0368300
GO:BP	detoxification	GO:0098754	0.0003603978700579923	323	41	8	18096	OS06G0695200,OS06G0695300,OS03G0643700,OS07G0638400,OS07G0531400,OS09G0367700,OS03G0368300,OS11G0210500
GO:BP	antibiotic catabolic process	GO:0017001	0.0009379720059362231	158	41	6	18096	OS06G0695200,OS06G0695300,OS07G0638400,OS07G0531400,OS03G0368300,OS11G0210500
GO:BP	response to toxic substance	GO:0009636	0.000980394211551812	369	41	8	18096	OS06G0695200,OS06G0695300,OS03G0643700,OS07G0638400,OS07G0531400,OS09G0367700,OS03G0368300,OS11G0210500
GO:BP	oxidation-reduction process	GO:0055114	0.004090065862990065	2101	41	16	18096	OS04G0612700,OS08G0480400,OS06G0695200,OS02G0318100,OS06G0695300,OS07G0638400,OS07G0531400,OS12G0617400,OS04G0339400,OS11G0428800,OS06G0216300,OS12G0442800,OS07G0635500,OS03G0368300,OS11G0210500,OS02G0601300
GO:BP	antibiotic metabolic process	GO:0016999	0.0044733857984338874	207	41	6	18096	OS06G0695200,OS06G0695300,OS07G0638400,OS07G0531400,OS03G0368300,OS11G0210500
GO:BP	hydrogen peroxide catabolic process	GO:0042744	0.012619273510666119	146	41	5	18096	OS06G0695200,OS06G0695300,OS07G0638400,OS07G0531400,OS03G0368300
GO:BP	cofactor metabolic process	GO:0051186	0.013578293140522111	528	41	8	18096	OS06G0695200,OS06G0695300,OS03G0643700,OS07G0638400,OS07G0531400,OS09G0367700,OS03G0368300,OS01G0369700
GO:BP	hydrogen peroxide metabolic process	GO:0042743	0.015323670925311323	152	41	5	18096	OS06G0695200,OS06G0695300,OS07G0638400,OS07G0531400,OS03G0368300
GO:BP	cellular response to toxic substance	GO:0097237	0.024246172742346764	279	41	6	18096	OS06G0695200,OS06G0695300,OS07G0638400,OS07G0531400,OS03G0368300,OS11G0210500
GO:BP	cellular detoxification	GO:1990748	0.024246172742346764	279	41	6	18096	OS06G0695200,OS06G0695300,OS07G0638400,OS07G0531400,OS03G0368300,OS11G0210500
GO:BP	cofactor catabolic process	GO:0051187	0.026212131254658363	170	41	5	18096	OS06G0695200,OS06G0695300,OS07G0638400,OS07G0531400,OS03G0368300
GO:BP	drug catabolic process	GO:0042737	0.030667162867400018	291	41	6	18096	OS05G0247800,OS06G0695200,OS06G0695300,OS07G0638400,OS07G0531400,OS03G0368300
GO:BP	drug metabolic process	GO:0017144	0.03454944085169875	602	41	8	18096	OS05G0247800,OS06G0695200,OS06G0695300,OS07G0638400,OS07G0531400,OS03G0368300,OS11G0210500,OS10G0184300
GO:BP	reactive oxygen species metabolic process	GO:0072593	0.044499023883297704	190	41	5	18096	OS06G0695200,OS06G0695300,OS07G0638400,OS07G0531400,OS03G0368300
GO:CC	extracellular region	GO:0005576	0.024502614817596413	734	41	8	18385	OS05G0247800,OS06G0695200,OS06G0695300,OS07G0531400,OS08G0231400,OS08G0189900,OS03G0368300,OS02G0629800
KEGG	Phenylpropanoid biosynthesis	KEGG:00940	0.0007045166313115916	156	15	6	3410	OS04G0612700,OS06G0695200,OS06G0695300,OS07G0638400,OS07G0531400,OS03G0368300
