# Supplementary material for: Paraburkholderia phytofirmans PsJN colonization of rice endosphere triggers an atypical transcriptomic response compared to rice native Burkholderia s.l. endophytes
Source: Sci Rep. 2023 Jul 3;13:10696. doi: 10.1038/s41598-023-37314-7 (PMC10317989; doi:10.1038/s41598-023-37314-7)
Supplement: Supplementary file 15 — Supplementary Table S9. [file 41598_2023_37314_MOESM15_ESM.xlsx]

## Sheet: Root-up
Supplementary Table S9: functional categorization of the most highly regulated DEGs (|Log2FoldChange| > 1) for the common response to the three endophytes (PsJN, Pk and BV).
Gene ID	Class	Annotation	Gene name	P. phytofirmans	P. kururiensis	B. vietnamiensis
Os06g0573900	Hormone	Similar to 1-aminocyclopropane-1-carboxylic acid oxidase.		2.16488	1.31316	2.12313
Os12g0589000	Development	Similar to Helix-loop-helix DNA-binding domain containing protein.	OsbHLH130, OsRSL9	1.80927	2.03071	1.64202
Os09g0551251	Signaling	Similar to H0105C05.10 protein.		1.79371	1.30427	1.68816
Os04g0633900	Signaling	Similar to H0315F07.1 protein.		1.77459	1.07898	1.6907
Os03g0197100	Transport	Similar to Sugar transporter protein.		1.31998	1.15622	1.80797
Os04g0491200	Transport	Oligopeptide transporter domain containing protein.		1.28431	0.974754	1.11442
Os07g0519100	Secondary metabolism	Similar to taxane 10-beta-hydroxylase.		1.26383	0.986181	1.29472
Os04g0673300	Hormone	A-type response regulator, Cytokinin signaling	OsRR6	1.2546	0.657294	0.943549
Os01g0818700		Leucine-rich repeat, N-terminal domain containing protein.		1.23777	0.863645	1.02099
Os02g0771600	Hormone	Similar to 1-aminocyclopropane-1-carboxylate oxidase (Fragment).	OsACO3	1.23229	1.02923	1.05826
Os04g0439400	Other	Similar to H0525C06.6 protein.		1.2174	1.19732	1.32607
Os05g0552600	Development	Similar to root cap periphery gene2.		1.13493	1.18197	1.34704
Os07g0257200		Manganese and Cadmium transporter, Mn and Cd uptake	OsNRAMP5	1.04775	0.809601	0.922294
Os11g0685300		Hypothetical conserved gene.		1.04507	0.894233	1.36359
Os03g0741050	Other	Non-protein coding transcript.		1.03566	1.06576	1.12138
Os05g0493800		Similar to nodulin-like protein.		1.03162	0.621104	1.11152
Os12g0157066		Hypothetical protein.		1.02552	0.737466	0.967941
Os02g0153700		Serine/threonine protein kinase domain containing protein.		0.99205	0.822012	0.935535
Os05g0586500	Transport	Amino acid transporter, transmembrane family protein.	OsGAT1	0.976268	0.835407	0.953747
Os07g0520100	Secondary metabolism	Similar to taxane 10-beta-hydroxylase.		0.970443	0.660146	0.933141
Os12g0137700		Sulfotransferase family protein.		0.897754	0.636228	0.924949
Os01g0370000	Hormone	NADH:flavin oxidoreductase/NADH oxidase, N-terminal domain containing protein.	OsOPR9	0.786254	0.874948	0.957084
Os08g0332600	Defense	Disease resistance protein domain containing protein.		0.718738	1.07139	0.738982
Os07g0603300		TON1 RECRUIT MOTIF (TRM)-containing protein, Regulation of grain size and shape	GL7, GW7	0.6835	0.504144	0.602467
Os10g0561800		Similar to homeodomain leucine zipper protein hox1.	OsHox1	0.644769	0.66809	0.84252
Os05g0126400		Conserved hypothetical protein.		0.631855	0.604766	0.692282
Os02g0588700		Conserved hypothetical protein.		0.623628	0.66248	0.684732
Os09g0369000	Hormone	Hypothetical gene.	OsERF50, AP2/EREBP113, OsDREB6	0.615864	0.598723	0.912698
Os11g0671000		Similar to Dormancy-associated protein.		0.610038	0.473264	0.903668
Os07g0524000		Conserved hypothetical protein.		0.587964	0.486218	0.699287
Os07g0602900		Protein of unknown function DUF1675 domain containing protein.		0.465282	0.594813	0.814129
Os02g0255500	Hormone	Similar to Extensin (Fragment).	OsPYL3, OsRCAR1	0.41415	0.421185	0.715864
Os05g0155200	Hormone	Similar to Ethylene receptor.	OsERS2	0.411283	0.488937	0.628528

## Sheet: Root-down
Gene ID	Class	Annotation	Gene name	P. phytofirmans	P. kururiensis	B. vietnamiensis
Os02g0587600	Unknown	Conserved hypothetical protein.		-10.1286	-4.31598	-8.70717
Os07g0531200	Unknown	Conserved hypothetical protein.		-8.9133	-5.67686	-7.96462
Os01g0498802	Other	Non-protein coding transcript.		-8.69895	-2.534	-5.68633
Os05g0469600	Primary metabolism	Similar to Pyruvate decarboxylase (Fragment).	pdc1, RRJ2	-8.50477	-1.94023	-5.62607
Os03g0432100	Primary metabolism	Similar to Pyruvate, phosphate dikinase 2.	Osppdka	-8.1134	-1.08456	-5.49658
Os06g0104900	Primary metabolism	Similar to L-lactate dehydrogenase B (EC 1.1.1.27) (LDH-B) (Fragment).		-7.06623	-1.68623	-5.37659
Os05g0469800	Primary metabolism	Pyruvate decarboxylase (EC 4.1.1.1) (Fragment).		-6.6694	-1.94285	-5.0814
Os02g0808800	Defense	Similar to Cinnamoyl-CoA reductase (EC 1.2.1.44).	OsCCR1	-5.83804	-2.51618	-4.84202
Os09g0471000	Stress	Similar to cupin, RmlC-type.		-5.2417	-2.10331	-3.80854
Os09g0323500	Unknown	Protein of unknown function DUF833 family protein.		-4.80227	-1.29873	-2.73283
Os03g0182900	Other	Non-protein coding transcript.		-4.65389	-1.4905	-3.23773
Os07g0604600	Other	Similar to B12D protein.		-4.08221	-1.7399	-3.77336
Os10g0407200	Other	Protein of unknown function DUF962 family protein.		-3.91388	-2.00553	-2.01645
Os02g0811800	Defense	Similar to Cinnamoyl-CoA reductase (EC 1.2.1.44).	OsCCR10	-3.85887	-3.41007	-4.9889
Os03g0766600	Unknown	Conserved hypothetical protein.		-3.79328	-1.53938	-3.79405
Os07g0124100	Development	Similar to Phytosulfokines 4 precursor.	OsPSK4	-3.68864	-1.54102	-2.28399
Os03g0655100	Stress	Similar to Cupin, RmlC-type.		-3.52767	-1.56853	-2.91515
Os05g0244700	Primary metabolism	Aminotransferase, class IV family protein.	OsAT-IV	-3.36449	-1.30186	-2.04269
Os01g0155800		Conserved hypothetical protein.		-2.65413	-0.778028	-1.33079
Os01g0313300	Hormone	Similar to EREBP-3 protein (Fragment).	OsERF68, AP2/EREBP3	-3.3469	-1.36054	-2.79108
Os05g0404700	Other	Similar to MBD1.		-3.33522	-1.98165	-2.78624
Os06g0141600	Transport	Early nodulin 93 ENOD93 protein family protein.	OsENOD93	-3.30974	-1.38872	-3.31723
Os02g0584700		Heavy metal transport/detoxification protein domain containing protein.		-1.95011	-0.929962	-1.46878
Os01g0508100	Defense	Ferritin/ribonucleotide reductase-like family protein.	RH3	-3.25379	-2.06887	-2.82723
Os09g0417600	Defense	WRKY transcription factor, Transcriptional repressor, Pathogen defense	OsWRKY76	-3.22236	-1.92276	-2.64413
Os07g0251900	Signaling	Leucine-rich repeat, N-terminal domain containing protein.		-3.11621	-1.5226	-2.51162
Os03g0195100	Defense	Putative aminotransferase, Disease resistance response against infection with rice blast fungus	OsALD1	-3.01899	-1.9138	-2.65204
Os08g0128000		Galactose oxidase/kelch, beta-propeller domain containing protein.		-1.6282	-0.801316	-1.28478
Os01g0127000	Other	Multicopper oxidase, Maintenance of Pi homeostasis	OsLPR3	-2.97536	-2.76601	-3.42613
Os01g0714600		Similar to cDNA clone:J023088C01, full insert sequence.		-1.47929	-0.889326	-1.16659
Os01g0713200		Similar to Beta-glucanase.	Gns10	-1.44956	-1.14159	-0.840364
Os02g0651900		Hypothetical protein.		-1.41932	-0.948485	-1.03436
Os03g0595600	Detoxification	Similar to Glutathione S-transferase, N-terminal domain containing protein, expressed.	OsGSTU43	-2.77964	-1.34986	-3.32671
Os03g0724500		Conserved hypothetical protein.		-1.39327	-0.736366	-1.30668
Os03g0850400		Similar to Aspartokinase.		-1.38421	-0.984518	-1.31929
Os01g0185500		Protein of unknown function DUF1637 domain containing protein.		-1.29131	-0.698646	-1.38439
Os03g0815100		Similar to OsNAC6 protein.	OsNAC9, OsSNAC1	-1.28713	-0.924319	-1.3217
Os06g0142300	Transport	Early nodulin 93 ENOD93 protein family protein.	OsENOD93	-2.70502	-1.10108	-1.41523
Os06g0125200		Protein of unknown function DUF581 family protein.		-1.23812	-0.974236	-0.770555
Os09g0441400		Similar to Elicitor-inducible cytochrome P450.		-1.23044	-0.861167	-1.02089
Os06g0293500		Conserved hypothetical protein.		-1.20822	-0.61732	-1.05532
Os03g0803500		Similar to Prolyl 4-hydroxylase alpha-1 subunit-like protein.		-1.17378	-0.6508	-1.26236
Os07g0532800		Peptidase A1 domain containing protein.		-1.14862	-0.997821	-1.31479
Os10g0576600		Tetratricopeptide-like helical domain containing protein.		-1.14477	-0.749478	-0.935434
Os07g0251200		Conserved hypothetical protein.		-1.11873	-0.936257	-0.789996
Os03g0405900		Hypothetical conserved gene.		-1.08868	-0.814603	-0.92472
Os10g0536450		Hypothetical protein.		-1.08586	-0.826096	-0.995848
Os03g0152000		Heavy metal transport/detoxification protein domain containing protein.		-1.05426	-0.842033	-0.716313
Os10g0552700		Similar to Tumor-related protein (Fragment).		-1.02946	-0.792571	-0.977011
Os07g0539100		Glycoside hydrolase, family 17 protein.	Gns11	-1.02449	-0.864771	-0.864482
Os03g0405500		Similar to PDI-like protein.		-1.02316	-0.961151	-1.0278
Os09g0358000		Similar to OsD305.		-0.960805	-1.15861	-0.807488
Os03g0100030		CAAX amino terminal protease domain containing protein.		-0.918882	-0.821756	-1.01852
Os01g0347300		Conserved hypothetical protein.		-0.91552	-0.727197	-0.911621
Os03g0764100		Zinc finger transcription factor ZF1.	WZF1	-0.892187	-0.727401	-0.807542
Os02g0763000		Protein of unknown function Cys-rich family protein.	OsFWL1	-0.890706	-0.629535	-0.760877
Os01g0656600		Conserved hypothetical protein.		-0.87153	-0.54221	-1.00958
Os06g0579100		Conserved hypothetical protein.		-0.846556	-0.755382	-0.882467
Os05g0217000		Protein of unknown function DUF1070 family protein.	OsAGP23	-0.845174	-0.835267	-0.70197
Os01g0266500		Phenazine biosynthesis PhzC/PhzF protein family protein.		-0.826145	-0.814747	-0.795952
Os06g0598800		Similar to Fatty acid elongase 1-like protein.	WSL1, OsFAE1', OsCER6	-0.82114	-0.686199	-0.890847
Os12g0623600		Protein of unknown function DUF1637 family protein.		-0.76929	-0.508011	-1.03325
Os10g0552800		Similar to Tfm5 protein.		-0.749501	-0.542352	-0.650041
Os02g0731300		Non-protein coding transcript.		-0.672363	-0.531671	-1.11495
Os04g0674400		Similar to Anamorsin (Cytokine induced apoptosis inhibitor 1) (CUA001). Splice isoform 2.		-0.643957	-0.668792	-0.615458
Os05g0399200		Similar to Endo-1, 3;1, 4-beta-D-glucanase precursor (EC 3.2.1.-).		-0.578033	-0.506769	-0.713272
Os01g0528800		Similar to Cinnamyl alcohol dehydrogenase.	CADL	-0.576873	-0.643104	-0.621555
Os03g0238600		Similar to Purple acid phosphatase.	OsPAP3c	-0.555069	-0.472264	-0.664752
Os05g0507300		Similar to Calreticulin-3.		-0.518771	-0.507857	-0.606152
Os06g0591600		Similar to Hemoglobin Hb2.		-0.500124	-0.426226	-0.673031
Os06g0142200	Transport	Early nodulin.	OsENOD93a	-2.62228	-1.23814	-2.03514
Os09g0417800	Defense	WRKY transcription factor, Transcriptional repressor, Pathogen defense	OsWRKY62, XB10	-2.58737	-2.48955	-2.65857
Os01g0720700	Primary metabolism	Similar to satase isoform I.	OsSAT	-2.57611	-2.44019	-2.54973
Os03g0643250	Signaling	Similar to Hydrolase-like protein.		-2.53346	-1.47561	-2.38555
Os01g0508500	Defense	Conserved hypothetical protein.	RH2	-2.51436	-2.0692	-1.89192
Os04g0249600		Similar to senescence-associated protein DIN1.	OsStr6, OsHAC1;2	-1.2443	-0.742727	-1.17331
Os05g0247100		Similar to Glycosyl hydrolases family 18.	DIP3, XIP, OsHI-XIP	-1.02921	-1.24261	-0.788015
Os03g0276500		Similar to Heat shock protein 70.	OsHsp71.1, OsMED37_3	-0.90253	-0.670775	-1.34154
Os01g0667200		Mitochondrial sulfur dioxygenase, Abiotic stress response		-0.875901	-0.874777	-0.834675
Os01g0847700		Aldo-keto reductase, Detoxification of reactive aldehydes, Abiotic stress tolerance	OsAKR2	-0.846609	-0.614322	-0.852762
Os01g0180800		Heat shock protein Hsp70 family protein.		-0.68898	-0.549993	-0.649754
Os02g0802500	Transport	Similar to H(+)-translocating (Pyrophosphate-ENERGIZED) inorganic pyrophosphatase beta-1 polypeptide (EC 3.6.1.1) (Fragment).		-2.49751	-1.26945	-2.13877
Os06g0591200	Unknown	Conserved hypothetical protein.		-2.48836	-1.74185	-2.15335
Os01g0910900	Unknown	Conserved hypothetical protein.		-2.45558	-1.9529	-2.22418
Os04g0635100	Unknown	Similar to H0315F07.12 protein.		-2.42499	-1.36487	-2.74888
Os01g0194600		Thioredoxin fold domain containing protein.	OsGRX2	-0.985833	-0.601726	-0.885885
Os01g0371500	Oxidative stress	Similar to Glutathione-S-transferase 19E50.	OsGSTF10	-0.69341	-0.740059	-0.722622
Os03g0219200	Oxidative stress	Similar to Superoxide dismutase (EC 1.15.1.1).	OsSOD2	-0.560256	-0.447834	-0.563592
Os01g0905300	Other	EXO70 FAMILY PROTEIN FX14	OsExo70FX14	-2.41314	-1.33951	-2.43606
Os04g0345800	Primary metabolism	1,2-dihydroxy-3-keto-5-methylthiopentene dioxygenase	ARD3	-2.40666	-1.07148	-1.77103
Os03g0619875	Unknown	Conserved hypothetical protein.		-2.28603	-1.33374	-2.04965
Os10g0537800	Protein degradation	Peptidase aspartic, catalytic domain containing protein.		-2.20856	-1.75668	-1.79924
Os04g0635650	Other	Non-protein coding transcript.		-2.20536	-1.0522	-2.51917
Os03g0341000	Hormone	Similar to AP2 domain containing protein RAP2.2 (Fragment).	OsERF66, AP2/EREBP30	-2.20325	-1.79103	-1.99234
Os05g0161800		RelA/SpoT domain containing protein.	OsCRSH3	-1.12905	-1.01081	-0.974718
Os11g0694100		Similar to Protein kinase domain containing protein, expressed.	OsWAK123	-0.968576	-1.34763	-1.31755
Os01g0895200	Transport	DOMON related domain containing protein.		-2.15633	-2.13888	-1.80467
Os08g0203400	Signaling	Protein kinase, core domain containing protein.	SHR5	-2.15343	-1.29076	-1.36595
Os10g0552200	Stress	Plant lipid transfer protein and hydrophobic protein, helical domain containing protein.	OsHyPRP16	-2.12396	-1.61569	-2.33204
Os01g0129600	RNA metabolism	Similar to LBD40 (LOB DOMAIN-CONTAINING PROTEIN 40).		-2.03057	-2.33205	-2.58156
Os05g0560900	Hormone	Similar to gibberellin 2-beta-dioxygenase.	OsGA2ox8	-1.95978	-1.15154	-1.72758
Os02g0584200	Other	Root-specific unknown protein 3	OsRSP3	-1.94782	-1.33136	-1.86491
Os01g0895300	Other	Cytochrome b561, eukaryote domain containing protein.		-1.92835	-2.23459	-2.30607
Os10g0552300	Other	Conserved hypothetical protein.	OsHyPRP17	-1.9197	-1.26904	-1.91918
Os10g0419400	Stress	Similar to SIPL.	OsARD1, OsIDI1L/OsARD1	-1.89376	-1.24997	-1.26172
Os06g0683800	Unknown	Conserved hypothetical protein.		-1.87712	-1.08219	-1.53635
Os05g0158600	Hormone	Similar to OsGA2ox1.	OsGA2ox1	-1.44716	-0.74328	-1.44226
Os03g0182800	Hormone	Similar to Ethylene responsive element binding factor3 (OsERF3).	OsERF60, AP2/EREBP27, OsEBP89	-1.03791	-0.580691	-0.812686
Os04g0635000	Unknown	Similar to H0315F07.10 protein.		-1.86541	-1.04924	-2.09801
Os10g0452100	Unknown	Conserved hypothetical protein.		-1.82368	-1.27961	-1.60673
Os02g0807900	Signaling	Conserved hypothetical protein.	OsWAK21	-1.80466	-1.12321	-2.17061
Os07g0225300	Development	OsNAC3 protein.	OsNAC3	-1.73144	-1.38219	-1.36209
Os11g0539200		Similar to Xyloglucan endotransglycosylase XET2 (Fragment).	OsXTH2, OsXTR1	-0.938672	-0.723998	-0.694424
Os10g0535800	Other	Protein of unknown function Cys-rich domain containing protein.		-1.72548	-1.56952	-1.46809
Os02g0106100	Primary metabolism	Similar to Fructosyltransferase.	OsINV3, OsVIN2	-1.67396	-1.10343	-1.32833
Os07g0190800	Detoxification	Similar to Thioredoxin h.	OsTRXh5, OsTrx24	-1.66142	-1.12147	-1.37129
Os10g0536400	Secondary metabolism	Similar to Oxidoreductase, 2OG-Fe oxygenase family protein, expressed.	OsF3H-2	-1.13677	-0.995688	-1.12529
Os04g0635400	Unknown	Conserved hypothetical protein.		-1.61357	-1.3798	-1.9091
Os03g0277700	Stress	Protein of unknown function DUF26 domain containing protein.		-1.60204	-1.28693	-1.09998
Os10g0498100	Other	Alpha/beta hydrolase fold-1 domain containing protein.		-1.58481	-1.59162	-1.80915
Os01g0588100	Defense	Similar to Hypersensitive-induced response protein.		-1.57618	-1.05551	-1.35161
Os03g0122300	Defense	Similar to Flavanone 3-hydroxylase-like protein.	FLS	-1.56254	-1.02849	-1.42954
Os04g0556500	Hormone	cis-Zeatin-O-glucosyltransferase, Catalyze O-glucosylation of cZ and cZ-riboside	OscZOGT1	-1.49772	-1.34931	-1.63548
Os02g0215200	Development	Class-I type histone deacetylase, Vegetative growth	OsHDAC2	-1.47783	-1.58166	-1.40793
Os03g0369000	Detoxification	Similar to Peroxidase 1.	prx46	-1.44616	-1.72967	-2.15778
Os01g0955100	Signaling	Similar to Calmodulin-like protein (Fragment).	OsCML31, OsMSR2	-1.44312	-1.08041	-1.36598
Os05g0322900	Defense	WRKY transcription factor, Benzothiadiazole (BTH)-inducible blast resistance	OsWRKY45	-1.42372	-0.802426	-1.04184
Os08g0189500	Defense	Germin-like protein 8-6, Disease resistance	OsGLP8-6	-1.44027	-1.14599	-1.57195
Os01g0783700	Signaling	Similar to EF-hand Ca2+-binding protein CCD1.		-1.43416	-1.25567	-1.72825
Os01g0803200		Cysteine proteinase inhibitor-I (Oryzacystatin-I).	OsCP1, OsCYS1	-0.709678	-0.773641	-0.674739
Os04g0412300	Other	Similar to H0717B12.10 protein.		-1.41851	-1.10067	-1.4008
Os07g0129200	Defense	Pathogenesis-related 1a protein, Regulation of abiotic stress responses	OsPR1a, OsSCP	-1.36347	-1.25896	-1.24264
Os09g0526700	Development	Similar to UDP-glucose 4-epimerase (EC 5.1.3.2) (Galactowaldenase) (UDP-galactose 4-epimerase).	OsUGE3	-1.2891	-1.07075	-1.43168
Os04g0268700	Other	Eggshell protein family protein.		-1.27734	-1.00581	-1.13173
Os07g0668500	Signaling	Protein kinase, catalytic domain domain containing protein.		-1.26934	-1.0293	-1.46287
Os10g0204400	Primary metabolism	Similar to Phosphoenolpyruvate carboxykinase (Fragment).	OsPEPCK	-2.68891	-0.88694	-1.85808
Os10g0552600	Other	Similar to Tfm5 protein.	OsHyPRP18	-1.21254	-1.47378	-1.46756
Os03g0285300	Unknown	Conserved hypothetical protein.		-1.20313	-1.39338	-1.24768
Os04g0447700	Iron metabolism	Similar to Polyketide reductase.	DMAS	-1.17235	-1.14715	-1.22203
Os01g0147900	Primary metabolism	Triosephosphate isomerase, cytosolic (EC 5.3.1.1) (TIM) (Triose- phosphate isomerase).	TI	-0.632461	-0.694388	-0.750596

## Sheet: Leaf-up
Gene ID	Class	Annotation	Gene name	P. phytofirmans	P. kururiensis	B. vietnamiensis
Os10g0195250	Unknown	Conserved hypothetical protein.		7.13691	7.58405	9.24404
Os01g0162400	Unknown	Conserved hypothetical protein.		6.11462	5.60669	5.67326
Os11g0262600	Unknown	Conserved hypothetical protein.		5.81064	6.45352	8.13871
Os01g0495701	Unknown	Hypothetical conserved gene.		5.45533	5.07539	7.41661
Os03g0431600	Unknown	Hypothetical conserved gene.		5.10292	5.02124	7.14501
Os01g0647200	Unknown	Hypothetical conserved gene.		4.61114	5.35548	6.30299
Os06g0109200	Unknown	Protein of unknown function DUF6, transmembrane domain containing protein.		2.60907	2.49146	2.56756
Os01g0750500	Unknown	Protein of unknown function DUF814 domain containing protein.		2.3536	1.88774	1.77
Os03g0736900	Unknown	Similar to Sorghum bicolor protein targeted either to mitochondria or chloroplast proteins T50848.		2.22492	1.72381	2.5797
Os01g0909400	Unknown	Protein of unknown function DUF868, plant family protein.		2.00484	1.23809	1.74824
Os01g0221000	Unknown	Hypothetical protein.		1.94337	1.72419	1.79555
Os04g0606200	Unknown	Similar to OSIGBa0113I13.1 protein.		1.93054	1.07386	1.46779
Os03g0133300		Similar to F7F22.5.		2.50896	0.90869	2.7201
Os02g0637200	Unknown	Conserved hypothetical protein.		1.86655	1.58197	1.74259
Os06g0263801	Unknown	Hypothetical gene.		1.73173	1.1683	1.2526
Os02g0254600	Unknown	Conserved hypothetical protein.		1.72306	1.48571	1.37976
Os05g0344200	Unknown	Conserved hypothetical protein.		1.68527	1.11202	1.41661
Os05g0390300	Unknown	Conserved hypothetical protein.		1.67809	1.69803	1.75242
Os12g0466200	Unknown	Conserved hypothetical protein.		1.51992	1.06713	1.38472
Os01g0729900	Unknown	Conserved hypothetical protein.		1.42526	1.2011	1.25493
Os04g0645700	Unknown	Similar to H0811D08.5 protein.		1.38352	1.02895	1.43026
Os02g0806350	Unknown	Hypothetical protein.		1.3664	1.68141	1.0349
Os01g0132500	Unknown	Protein of unknown function DUF1639 domain containing protein.		1.36551	1.27402	1.27582
Os06g0604600	Unknown	Conserved hypothetical protein.		1.27636	1.06541	1.1231
Os06g0301500	Unknown	Hypothetical protein.		1.25268	1.30656	1.10613
Os02g0808500	Unknown	Hypothetical protein.		1.16536	1.23316	1.20433
Os08g0126700		Nucleotide-binding, alpha-beta plait domain containing protein.	OsC3H54	2.20427	0.97994	2.28338
Os04g0461600	Unknown	Similar to Fw2.2.		1.15998	1.47208	1.1243
Os06g0661500	Unknown	Conserved hypothetical protein.		1.12819	1.00253	1.37899
Os07g0563400	Other	Protein of unknown function DUF761, plant family protein.		2.13166	2.53699	1.98381
Os01g0247600	Other	Conserved hypothetical protein.		2.01214	1.05446	1.77126
Os10g0544600	Other	Zinc finger, RING/FYVE/PHD-type domain containing protein.		1.92319	1.78414	1.54818
Os06g0698748		Similar to cDNA clone:J023083M02, full insert sequence.		2.0291	0.942938	1.9248
Os03g0275300	Other	Ankyrin repeat family protein		1.91782	1.58706	1.90748
Os04g0635700	Other	Aldehyde dehydrogenase, conserved site domain containing protein.		1.84166	1.14211	1.84143
Os05g0468900	Other	Zinc finger, RING/FYVE/PHD-type domain containing protein.		1.78806	1.43222	1.55444
Os02g0126600	Other	Conserved hypothetical protein.		1.78087	1.5458	1.81278
Os06g0699800	Other	ENTH/VHS domain containing protein.		1.71776	1.40643	1.55532
Os03g0606100	Other	Similar to predicted protein.		1.70903	1.16687	1.96659
Os03g0364700		Transcription elongation factor, TFIIS/CRSP70, N-terminal domain containing protein.		1.87785	0.759361	1.95516
Os06g0484500	Other	Conserved hypothetical protein.		1.58522	1.6389	1.36256
Os05g0567600	Other	Similar to SANT/MYB protein.		1.44306	1.49719	1.32291
Os02g0806400	Other	Similar to Gata zn finger family protein.		1.39179	1.73184	1.04053
Os08g0172300	Other	Similar to H1005F08.16 protein.		1.38093	1.07411	1.42219
Os04g0626400	Other	Similar to OSIGBa0148A10.12 protein.		1.33295	1.00313	1.22549
Os06g0506000	Other	Conserved hypothetical protein.		1.30424	1.12087	1.42425
Os08g0547300	Other	Similar to Cytochrome P450 78A1 (EC 1.14.-.-) (CYPLXXVIII).		1.30375	1.40653	1.12438
Os08g0545000	Other	Pyridoxal phosphate-dependent transferase, major region, subdomain 1 domain containing protein.		1.2609	1.64598	1.27597
Os02g0754600	Other	Conserved hypothetical protein.		1.22724	1.02676	1.15044
Os01g0602400	Other	Similar to Cytochrome P450 monooxygenase CYP72A5 (Fragment).	OsCYP72A32	1.18563	1.31535	1.1906
Os01g0221800	Other	Non-protein coding transcript.		1.11869	1.05232	1.03597
Os04g0391500		Similar to ACR4.	OsACR6	1.74887	1.56886	0.841585
Os02g0566400	Other	Similar to OSIGBa0152K17.7 protein.		1.05604	1.26934	1.08228
Os10g0493900	Other	Protein of unknown function DUF6, transmembrane domain containing protein.		1.04617	1.17563	1.01216
Os06g0259901	Other	Non-protein coding transcript.		1.03009	1.10051	1.01807
Os05g0496100	Translation	Translation initiation factor eIF3 subunit domain containing protein.		2.40752	1.40856	2.34715
Os07g0581400	Development	INDETERMINATE DOMAIN 5	OsIDD5	1.34195	1.36505	1.31983
Os02g0178800	Development	Glossy1(GL1) homolog, Cuticular wax biosynthesis, Drought resistance	OsGL1-2	2.51167	2.37824	1.57134
Os06g0295900		Hypothetical conserved gene.		1.69268	0.810649	1.56288
Os06g0696600	Development	Similar to Xyloglucan endo-transglycosylase homolog.	OsXTH12	2.50504	2.37643	2.00374
Os01g0123700	Development	Zinc finger, RING-type domain containing protein.		2.23265	1.78992	2.36193
Os04g0604200	Development	Similar to Xyloglucan endotransglycosylase (Fragment).	OsXTH6	2.17318	1.80802	1.71633
Os02g0523800	Development	Inositol polyphosphate kinase, Auxin signaling, Regulation of lateral root development	OsIPK2	1.8586	1.35921	1.72017
Os02g0744600	Development	Hypothetical conserved gene.	OsCSLA6	1.61635	1.58429	1.90249
Os03g0769800	Development	Similar to Homeodomain-leucine zipper protein interfascicular fiberless 1 (Revoluta).		1.60856	1.36581	1.53655
Os03g0132200	Development	Expansin-like protein A.		1.60006	1.28907	1.2
Os09g0509700	Development	Zinc finger, B-box domain containing protein.	OsBBX28, OsCCT32	1.42669	1.1547	1.69447
Os01g0185300	Development	Transferase family protein.	OsAT9	1.40978	1.77863	1.53777
Os05g0491200		Similar to SNF1 kinase complex anchoring protein (Fragment).	akin-b, akin-beta	1.64429	0.689718	1.79947
Os10g0502000		Similar to Thylakoid lumenal 17.4 kDa protein (P17.4) (Fragment).		1.62723	0.878379	1.72642
Os06g0179000	Development	Glycoside hydrolase family 79, N-terminal protein.		1.34943	1.35037	1.44614
Os03g0241300	Development	Conserved hypothetical protein.	OsPE	1.28172	1.53124	1.34312
Os06g0712200	Development	NUDIX domain containing protein.		1.06737	1.37831	1.16076
Os02g0755500	Secondary metabolism	Similar to UDP-glycosyltransferase 85A8.		1.32533	1.48515	1.31376
Os01g0837000		Ankyrin repeat containing protein.	OsNPR4	1.60525	0.824617	1.53667
Os05g0447700	RNA metabolism	Tetratricopeptide-like helical domain containing protein.		1.47908	1.87252	1.08883
Os11g0620100	RNA metabolism	Oligouridylate binding protein.		1.3718	1.55165	1.1108
Os01g0332100		Similar to Neutral invertase-like protein (Fragment).	OsNIN2	1.58249	0.890141	1.34443
Os06g0646700	RNA metabolism	Conserved hypothetical protein.	OsDLN169	1.13814	1.06984	1.04254
Os07g0191500	RNA metabolism	Pentatricopeptide repeat domain containing protein.		1.24675	1.04835	1.30111
Os07g0673550		Photosystem II protein PsbX family protein.		1.56214	0.924244	1.10006
Os03g0133400		Peptidoglycan-binding Lysin subgroup domain containing protein.	OsCEBiP	1.54756	0.889413	1.41478
Os12g0225100	RNA metabolism	Nucleotide-binding, alpha-beta plait domain containing protein.		1.21713	1.2416	1.10054
Os11g0248200	RNA metabolism	Nucleotide-binding, alpha-beta plait domain containing protein.		1.15726	1.13193	1.21411
Os12g0171250		Non-protein coding transcript.		1.54408	0.852752	1.86156
Os07g0559400	Iron metabolism	Similar to uncharacterized secreted protein.		1.5642	1.79677	1.41712
Os03g0125600		Ser Thr specific protein kinase-like protein.		1.5319	0.611654	1.5346
Os04g0463400	Iron metabolism	Vacuolar membrane transporter, Fe and Zn translocation between flag leaves and seeds	OsVIT1	1.22633	1.17123	1.14389
Os01g0579600		Similar to Calcineurin B-like protein 9.	OsCBL9	1.51804	0.926161	1.36268
Os05g0592300	Stress	Protein of unknown function DUF1637 family protein.		1.70258	1.68737	2.55587
Os01g0727800	Protein degradation	Peptidase S8, subtilisin-related domain containing protein.		1.37669	1.76915	1.26867
Os02g0731600	Protein degradation	Similar to Threonine endopeptidase.		1.30781	1.16724	1.18
Os03g0764100		Zinc finger transcription factor ZF1.	WZF1	1.48899	1.82161	0.703603
Os03g0117050		Non-protein coding transcript.		1.48389	0.907633	1.09914
Os07g0661300	Protein degradation	Similar to Ubiquitin-specific protease 24.		1.05463	1.39841	1.09368
Os03g0703100		Similar to Beta-glucosidase.	Os3BGlu8	1.483	0.824594	1.94657
Os02g0181300		WRKY transcription factor, Defense response	OsWRKY71	1.48128	1.65529	0.613037
Os06g0318700	Protein degradation	E3 ubiquitin-protein ligase makorin	OsC3H41	1.0074	1.02633	1.00045
Os12g0256000		Alpha/beta hydrolase fold-3 domain containing protein.		1.47879	0.972508	1.62473
Os03g0701200		Similar to Sugar-starvation induced protein (Fragment).		1.47438	0.952234	1.09251
Os03g0120400		Heavy metal transport/detoxification protein domain containing protein.		1.47375	0.556524	1.7345
Os04g0462500		Similar to 14-3-3-like protein GF14-6.	OsGF14b	1.46774	0.782401	1.7481
Os11g0550800	Photosynthesis	Similar to plastid-specific ribosomal protein 6.		1.72479	1.72148	1.33047
Os01g0949300		EF-Hand type domain containing protein.		1.44955	1.88734	0.864797
Os05g0568300	Photosynthesis	Similar to 50S ribosomal protein L12, chloroplast precursor (CL12).		1.66171	1.87366	2.11419
Os02g0578400	Photosynthesis	Photosystem II oxygen evolving complex protein PsbQ family protein.		1.61995	1.15808	1.17117
Os03g0815100		Similar to OsNAC6 protein.	OsNAC9	1.42717	1.02349	0.565447
Os08g0504500	Photosynthesis	Mog1/PsbP/DUF1795, alpha/beta/alpha sandwich domain containing protein.		1.54454	1.15983	1.56939
Os03g0828100	Photosynthesis	Similar to 50S ribosomal protein L18, chloroplastic.		1.48371	1.15267	1.58025
Os07g0520800	Photosynthesis	Ankyrin repeat-containing domain domain containing protein.	LHCP TRANSLOCATION DEFECT	1.36394	1.07013	1.18394
Os01g0662300	Photosynthesis	Similar to Isoform 2 of 50S ribosomal protein L12, chloroplastic.	OsRPL12-2	1.34969	1.11996	1.16298
Os03g0170500	Photosynthesis	Similar to Putativ eribonuclease P.		1.34904	1.39136	1.03244
Os09g0279500	Photosynthesis	Similar to Plastid-specific 30S ribosomal protein 2, chloroplast precursor (PSRP- 2).		1.19497	1.12765	1.20353
Os04g0523000	Photosynthesis	Photosystem II oxygen evolving complex protein PsbQ family protein.		1.12421	1.03209	1.42234
Os02g0105400	Primary metabolism	Similar to L-lactate dehydrogenase A (EC 1.1.1.27) (LDH-A).	LDH	1.75854	1.60634	1.16286
Os04g0568600	Primary metabolism	Similar to 6-phospho-3-hexuloisomerase.		1.70062	1.59177	1.93661
Os04g0638300		Hypothetical protein.		1.38094	0.990381	1.56707
Os12g0291100	Primary metabolism	Similar to Petunia ribulose 1, 5-bisphosphate carboxylase small subunit mRNA (clone pSSU 51), partial cds. (Fragment).	OsRBCS3	1.56244	1.19419	1.37762
Os07g0469200		Similar to predicted protein.		1.38014	0.931228	1.13658
Os01g0873100	Primary metabolism	Similar to Amidophosphoribosyltransferase, chloroplast precursor (EC 2.4.2.14) (Glutamine phosphoribosylpyrophosphate amidotransferase) (ATASE) (GPAT).	0	1.54662	1.02894	1.46959
Os04g0631100		Similar to H0105C05.5 protein.		1.37711	0.949618	1.1379
Os09g0503000	Primary metabolism	Alcohol dehydrogenase superfamily, zinc-containing protein.		1.53329	1.74206	1.42521
Os10g0396300		Similar to MOB1.		1.37369	0.900503	0.968534
Os06g0157000	Primary metabolism	Esterase, SGNH hydrolase-type domain containing protein.	OsGELP79	1.49909	1.11637	1.1226
Os04g0429800	Primary metabolism	Similar to Nicotinate phosphoribosyltransferase-like protein.	OsNaPRT2	1.45558	1.1162	1.86816
Os03g0765400		Similar to nucleoporin p58/p45.		1.36695	0.640261	1.30424
Os01g0681900	Primary metabolism	NADH-DEPENDENT GLUTAMATE SYNTHASE 1	OsGLT1, OsNADH-GOGAT1	1.26808	1.15664	1.08889
Os08g0113100	Primary metabolism	Similar to Fructokinase (Fragment).	OsFKII	1.12483	1.25812	1.15914
Os04g0612500	Defense	Similar to 36.4 kDa proline-rich protein.	OsHyPRP16	2.34124	1.62718	1.8454
Os11g0582100		Zinc finger, RING/FYVE/PHD-type domain containing protein.		1.35705	0.845782	1.04349
Os05g0537100	Defense	WRKY transcription factor 10.	OsWRKY7	2.32683	1.70278	2.43732
Os02g0251900	Defense	Similar to Tobacco rattle virus-induced protein variant 2.	OsVQ7	2.07139	1.46206	1.61408
Os05g0375400	Defense	Beta-glucanase precursor.	OsPR2, OsEGL1	2.03836	1.09091	2.2129
Os06g0666400	Defense	VQ domain containing protein.	OsVQ25	1.78166	1.34848	1.19643
Os02g0787300	Defense	Mitogen-activated protein kinase kinase 4, Defense response, Cell proliferation, Grain growth	OsMKK4	1.74388	1.87985	1.22758
Os06g0264800		Similar to Threonine endopeptidase.		1.34039	0.929633	0.946369
Os02g0173200	Defense	VQ domain containing protein.	OsVQ5	1.6757	1.38203	1.26711
Os02g0754300		Ribosomal protein L29 family protein.		1.33164	0.988901	1.13506
Os12g0520200	Defense	Similar to phenylalanine ammonia-lyase.	OsPAL9, OsTAM1	1.5142	1.55571	1.06188
Os09g0128400		Conserved hypothetical protein.		1.3262	0.874568	1.12418
Os06g0649000	Defense	PAMP (pathogen-associated molecular pattern)-responsive transrepressor, Defense response	OsWRKY28	1.50498	1.07976	1.22088
Os03g0796900		bZIP transcription factor, Globulin gene promoter in endosperm	OsbZIP33	1.3244	0.968453	1.33597
Os05g0337400		Similar to heavy-metal-associated domain-containing protein.		1.32266	0.896693	1.07934
Os04g0493100		Basic helix-loop-helix dimerisation region bHLH domain containing protein.	OsbHLH65	1.30996	0.76062	1.28919
Os06g0199300		Non-protein coding transcript.		1.30847	0.863329	1.3482
Os02g0110200	Defense	Fatty acid 13-hydroperoxide lyase (CYP74B), Plant defense	OsHPL3, CYP74B2	1.43182	1.48974	1.22653
Os04g0118800	Defense	NB-ARC domain containing protein.		1.39598	1.20927	1.54408
Os02g0605900	Defense	Similar to Chitinase (EC 3.2.1.14) A.	Cht6	1.24056	1.33484	1.37605
Os10g0554200	Transport	TGF-beta receptor, type I/II extracellular region family protein.		2.3501	1.71288	2.76058
Os02g0332700		Conserved hypothetical protein.		1.30067	0.876257	1.43882
Os01g0256500		Similar to ZnI.		1.30052	0.91631	1.45308
Os08g0396200		Hypothetical gene.		1.29383	0.826284	0.923268
Os02g0184200	Transport	Similar to Vacuolar proton pyrophosphatase.		1.65577	1.3286	1.57326
Os10g0456800		CHY zinc finger protein, Transcriptional co-activator of DST (Drought and Salt Tolerance: zinc finger transcription factor gene), Drought and salt tolerance, Stomatal aperture control		1.28214	0.748125	1.17968
Os02g0750100	Transport	Similar to ATP synthase.		1.37746	1.12357	1.23726
Os10g0575000		JAZ-interacting transcription factor, Positive regulator of jasmonate (JA) signaling pathway, Bacterial blight resistance, Spikelet development	OsMYC2	1.27729	1.42816	0.744023
Os06g0644200	Transport	Similar to Pyrophosphate-energized vacuolar membrane proton pump (EC 3.6.1.1) (Pyrophosphate-energized inorganic pyrophosphatase) (H+-PPase) (Vacuolar H+-pyrophosphatase).	OVP1	1.37066	1.14798	1.13619
Os09g0481200		Similar to photosystem I reaction center subunit V.	PsaG	1.27308	0.786222	0.87829
Os04g0481300		Methyltransferase type 11 domain containing protein.		1.27026	1.03276	0.909493
Os04g0691400	Transport	Similar to POT family protein.		1.35072	1.06154	1.3983
Os05g0506000		Similar to MS5-like protein (Fragment).		1.2691	0.556949	1.54205
Os06g0298200		Similar to CCT motif family protein.	OsBBX19, OsCCT22	1.2686	0.45839	1.37904
Os05g0205000	Transport	Similar to NOD26-like membrane integral protein ZmNIP1-1.	OsNIP1.3	1.26925	1.02964	1.37372
Os03g0164300		Conserved hypothetical protein.		1.2644	0.923398	1.6104
Os01g0871500	Transport	TGF-beta receptor, type I/II extracellular region family protein.		1.1979	1.11668	1.31938
Os10g0462600		Conserved hypothetical protein.		1.25879	0.604861	1.35379
Os02g0750200		Non-protein coding transcript.		1.25871	0.785194	1.0476
Os02g0208100	Transport	Similar to plastidic ATP/ADP-transporter.	OsNTT2	1.15111	1.14022	1.26503
Os02g0498100		Hypothetical protein.		1.24737	0.696525	1.18678
Os08g0410500	Transport	Similar to carbohydrate transporter/ sugar porter/ transporter.		1.13644	1.23419	1.24709
Os02g0465900		ChaC-like protein family protein.	OsARP, OsCTP	1.24423	0.987355	1.49447
Os01g0222600		Conserved hypothetical protein.		1.24285	0.843588	0.953872
Os07g0669650	Transport	Similar to Isoform 2 of Potassium transporter 7.		1.11478	1.27793	1.13844
Os07g0559700		Similar to Monosaccharide transporter 3.	OsMST6	1.23977	0.886972	1.25174
Os06g0306600		Alpha/beta hydrolase fold-3 domain containing protein.		1.23745	1.36947	0.956515
Os07g0475000		Conserved hypothetical protein.		1.23652	0.729033	1.01275
Os03g0805600		Similar to pheophorbide a oxygenase.		1.22873	1.12877	0.96013
Os01g0202500		Similar to B-box zinc finger family protein.	OsBBX1	1.22861	0.987008	1.03278
Os09g0319701		Conserved hypothetical protein.		1.2286	0.880312	0.928001
Os11g0177400	Transport	Similar to ATPase, coupled to transmembrane movement of substances.	OsABCG27	1.06461	1.38264	1.14678
Os05g0439200		Hypothetical protein.		1.22717	1.04071	0.747658
Os03g0107700		Similar to EL2 protein.	EL2	1.22705	1.43709	0.838394
Os12g0136500		Non-protein coding transcript.		1.2267	0.583591	1.35908
Os08g0300300	Transport	Similar to Chloride channel-like protein Osclc.	OsCBSCLC6	1.05511	1.06138	1.05793
Os11g0202300		Cyclin-like F-box domain containing protein.		1.22428	0.545352	1.19741
Os06g0306300		Haem peroxidase domain containing protein.	prx78	1.2241	0.813846	1.27333
Os01g0588200	Transport	Voltage-dependent anion channel.		1.04346	1.29712	1.04844
Os03g0711100		Member of the CONSTANS-like (COL) family, Flowering time repressor	OsBBX10, OsCCT14, OsCOL10	1.20453	0.938372	1.08915
Os11g0671000		Similar to Dormancy-associated protein.		1.20327	0.634751	1.25684
Os09g0451000	Hormone	ACC oxidase, Ethylene biosynthesis	OsACO2	2.44724	2.18545	1.6401
Os06g0729400	Hormone	Similar to Gibberellin-regulated protein 2 precursor.		2.19724	1.84586	2.73594
Os07g0182400	Hormone	AUX/IAA protein family protein.	OsIAA24	1.84753	1.48769	1.93168
Os02g0703600	Hormone	Similar to Abscisic acid 8'-hydroxylase 1.	OsABA8OX1, OsCYP707A5	1.77583	3.06512	1.30265
Os04g0584600		Similar to Calcium dependent protein kinase.	OsCDPK13	1.18679	0.725689	1.42339
Os05g0439100	Hormone	Similar to Transcription factor MYC7E (Fragment).		1.62386	1.21823	1.46078
Os07g0569100	Hormone	Remorin protein, Coordination of interlink between abscisic acid (ABA) and brassinosteroid (BR) signaling	OsREM4.1	1.3292	1.85878	1.13112
Os03g0685000		Similar to Ferredoxin.		1.18143	0.916214	1.0833
Os02g0152400		Rubisco small subunit 1, Reguration of Rubisco catalytic activity	OsRBCS1	1.18045	0.914904	1.22955
Os08g0105800		Cytochrome P450 family protein.		1.18042	0.746481	1.02349
Os01g0349600		Hypothetical protein.		1.17963	0.526322	1.00215
Os01g0252600		Similar to predicted protein.		1.17846	0.856231	1.03762
Os11g0692400		Conserved hypothetical protein.		1.17806	0.980516	1.25036
Os04g0555000		GRAS (GAI-RGA-SCR) plant-specific transcription factor, Maintenance of shoot apical meristem indeterminacy, Regulation of vegetative to reproductive phase change	OsHAM3	1.17036	0.844189	0.958227
Os05g0186000		Similar to 30S ribosomal protein S31, chloroplast (Fragment).		1.16717	0.936535	1.11355
Os07g0143600		Hypothetical conserved gene.		1.16586	0.65483	1.07353
Os01g0935400	Hormone	2OG-Fe(II) oxygenase domain containing protein.		1.28262	1.61887	1.30069
Os01g0681700		Hypothetical conserved gene.		1.16423	0.733961	0.786629
Os02g0199600		Similar to F-box domain containing protein.		1.16117	1.31832	0.854893
Os03g0741100	Hormone	Basic helix-loop-helix transcription factor, Drought tolerance	OsbHLH148	1.19622	1.38286	1.15302
Os06g0107700		Leaf-type ferredoxin-NADP+-oxidoreductase, Regulation of electron partitioning in the chloroplast		1.15839	0.83032	1.02083
Os03g0183200	Hormone	Similar to AP2 domain containing protein, expressed.	OsERF69	1.18775	1.15948	1.00358
Os09g0455300	Stress	Similar to INDEHISCENT protein.	OsbHLH120	2.46297	1.44239	2.11511
Os02g0124800		Conserved hypothetical protein.		1.1487	0.813287	1.13192
Os01g0619900		Similar to DNA binding.		1.14745	0.808149	1.06152
Os06g0654900		Similar to CONSTANS-like protein CO6.	OsBBX20, OsCCT23	1.14735	0.893266	0.843971
Os05g0404200		Methionine sulphoxide reductase B domain containing protein.	OsMSRB3	1.14419	0.868132	1.00609
Os02g0190600		Lycopene beta and epsilon cyclase domain containing protein.	OsLCYb	1.14299	0.955277	0.964082
Os01g0102850		Similar to nitrilase 2.		1.14226	0.792344	0.908034
Os01g0111100	Stress	Cyclophilin-like domain containing protein.	OsCYP26-2	2.37502	1.63213	2.10654
Os07g0584900		Armadillo-like helical domain containing protein.		1.13792	1.07973	0.812934
Os03g0388900		Peptidase C14, caspase catalytic domain containing protein.	OsMC1	1.1377	0.945955	1.07661
Os04g0462600		Dynein light chain, type 1 family protein.		1.13725	1.04621	0.974673
Os01g0784700		Serine/threonine protein kinase-related domain containing protein.		1.13654	0.760075	1.24357
Os11g0112000	Stress	Similar to Hypoxia induced protein conserved region containing protein, expressed.		2.3741	2.13296	2.2959
Os02g0652600		Ribosomal protein L19 family protein.		1.13583	0.816833	1.10762
Os03g0857900		Similar to Lysine decarboxylase-like protein.	LOGL5	1.13495	0.860695	1.2895
Os09g0542200		Thioredoxin-like fold domain containing protein.		1.13249	0.928469	1.13878
Os12g0605800		Similar to 3-methylcrotonyl CoA carboxylase biotin-containing subunit (Fragment).	OsL55	1.13017	0.786727	1.13821
Os09g0380050		Similar to catalytic/ ligase.		1.12881	0.974244	1.40187
Os02g0731700	Stress	CCT domain domain containing protein.	OsBBX8, OsCCT09	1.76995	1.4938	1.32376
Os03g0400700	Stress	Similar to retrotransposon protein.	OsLEA11	1.74519	1.31887	1.56615
Os03g0705800		Protein of unknown function DUF3049 domain containing protein.		1.1248	1.00382	0.964554
Os12g0552400	Stress	Rossmann-like alpha/beta/alpha sandwich fold domain containing protein.		1.18532	1.03269	1.35476
Os03g0815400		Ribosomal protein L17-like protein.		1.12024	0.692736	1.16925
Os05g0183100		Similar to WRKY transcription factor 16 (Fragment).	OsWRKY67	1.11963	0.549624	0.602313
Os04g0683900		Protein of unknown function DUF296 domain containing protein.		1.11886	1.00917	0.906856
Os03g0210900		Similar to predicted protein.		1.11843	0.891176	0.986702
Os03g0109300		Similar to Lysine decarboxylase-like protein.	LOGL3	1.11816	0.729241	1.43943
Os02g0126400	Stress	Calcium-dependent protein kinase, Positive regulator of the salt and drought stress responses	OsCDPK4	1.11752	1.01934	1.06495
Os04g0616900		Similar to H0525G02.14 protein.		1.11681	0.63785	1.39375
Os07g0677400	Detoxification	Peroxidase.	POX5.1, prx113	3.10858	2.27334	2.66791
Os04g0119400		Similar to Pyruvate dehydrogenase E1 component, alpha subunit.		1.10379	0.662949	1.36212
Os10g0516500		Conserved hypothetical protein.		1.10355	0.979041	0.978552
Os09g0541000		Similar to Aquaporin 2.	OsPIP2;7	1.10293	1.23546	0.627982
Os01g0178500		A member of rice Aux/IAA family, Cross-talk of auxin and brassinosteroid signaling pathways, Plant morphogenesis		1.10098	0.993245	1.25571
Os03g0265400		Similar to 50S ribosomal protein L4, chloroplast precursor (R-protein L4).		1.10056	0.927618	1.17291
Os01g0933075		Hypothetical protein.		1.09579	1.03399	0.989357
Os09g0517100		NB-ARC domain containing protein.		1.09441	0.543191	1.05996
Os11g0444900		Octicosapeptide/Phox/Bem1p domain containing protein.		1.09308	1.05986	0.660246
Os02g0307800		Protein of unknown function DUF3082 domain containing protein.		1.09199	0.996041	1.03837
Os04g0679400		Similar to H0801D08.15 protein.		1.08953	0.78692	0.640279
Os09g0321500		Hypothetical conserved gene.		1.08628	0.715588	1.04864
Os09g0492700		Similar to 3-hydroxy-3-methylglutaryl coenzyme A reductase (EC 1.1.1.34) (Fragment).	OsHMGR2	1.08059	1.34198	0.821974
Os11g0429900		Non-protein coding transcript.		1.07876	0.530719	0.968007
Os01g0786800		Protein of unknown function DUF81 domain containing protein.		1.07857	0.530636	0.939147
Os05g0348100		Similar to CRR23 ((chlororespiratory reduction 23).		1.07687	0.512976	1.00336
Os10g0181200		Similar to binding protein.		1.07593	0.462006	1.08975
Os05g0344400		Uncharacterised protein family UPF0497, trans-membrane plant domain containing protein.		1.07484	1.05404	0.858001
Os04g0470700		Amino acid transporter, transmembrane family protein.	OsAAP7A	1.07195	0.901712	0.958636
Os06g0536850		Non-protein coding transcript.		1.0713	0.837284	1.07177
Os04g0688300	Detoxification	Haem peroxidase, plant/fungal/bacterial family protein.	prx61	2.51827	1.87527	2.50334
Os08g0480800		Similar to TaWIN2.	OsGF14a	1.06894	0.73206	1.14656
Os12g0257500		Conserved hypothetical protein.		1.0681	1.00613	0.855962
Os07g0683200		Similar to NAC domain transcription factor.	OsNAC18	1.06777	0.950585	0.841494
Os06g0196300	Detoxification	Similar to Peroxiredoxin Q (Fragment).		1.41147	1.1272	1.27062
Os10g0522000		Similar to Methyltransferase family protein, expressed.		1.06677	1.01647	0.733267
Os05g0165800		Hypothetical protein.		1.06559	0.549232	0.991525
Os03g0762300	Detoxification	Similar to Peroxidase 51 precursor (EC 1.11.1.7) (Atperox P51) (ATP37).		1.07128	1.016	1.19424
Os11g0236100		Similar to Sucrose-phosphate synthase.	OsSPS11	1.06446	0.863948	0.735018
Os03g0840200		Six-bladed beta-propeller, TolB-like domain containing protein.		1.05909	1.1579	0.665414
Os04g0543500		Hypothetical conserved gene.		1.05775	1.70763	0.838336
Os12g0188700		Similar to Thioredoxin M5, chloroplastic.	OsTRX	1.05667	0.702767	0.827188
Os01g0162300	Signaling	Leucine-rich repeat, plant specific containing protein.		4.31751	3.71065	4.2919
Os05g0241200		Similar to Phophate translocator (Fragment).	OsTPT2	1.05566	0.896835	0.891633
Os01g0162200	Signaling	Leucine-rich repeat domain containing protein.		3.05741	1.22638	3.43871
Os01g0892800	Signaling	Similar to Ankyrin-kinase.	OsSTA40	2.41096	2.90062	2.55587
Os05g0401300		Mog1/PsbP, alpha/beta/alpha sandwich domain containing protein.		1.04903	0.780456	1.17416
Os03g0769100		Similar to 9S ribosomal protein.		1.04765	0.748454	0.945509
Os01g0848700	Signaling	Similar to Ras-related protein Rab11C.	OsSTA36	1.83305	1.91821	1.71535
Os01g0635200		Homeodomain-like containing protein.		1.045	0.774113	1.14044
Os03g0281500	Signaling	Catharanthus roseus receptor-like kinase1-like kinase	OsCrRLK1L7	1.7233	1.63783	1.24743
Os06g0581000		Similar to Nitrate transporter NTL1.		1.04272	0.768411	0.814717
Os02g0814800		Glutathione S-transferase, C-terminal-like domain containing protein.		1.04265	1.13271	0.831399
Os11g0528500		Similar to Rubredoxin 1 (Rd-1).		1.04247	0.691939	0.898801
Os12g0226900		Similar to Allyl alcohol dehydrogenase.	ClpC2	1.04233	0.647997	0.892867
Os04g0577300		Similar to GDSL-motif lipase/hydrolase-like protein.	OsGELP58	1.04182	0.542861	1.16734
Os10g0101000	Signaling	Serine/threonine protein kinase domain containing protein.		1.38617	1.78489	1.14691
Os05g0423500		Protein kinase, core domain containing protein.		1.04117	0.92102	1.01748
Os12g0189700		Twin arginine translocation signal, Tat domain containing protein.		1.04043	0.713493	0.767914
Os02g0121600		Similar to Zinc finger A20 domain-containing stress-associated protein 18.		1.04029	0.916039	1.11634
Os03g0178200		Protein of unknown function YGGT family protein.		1.03951	0.821263	1.02283
Os04g0680800		Mlo-related protein family protein.	OsMLO4	1.03906	0.744601	1.64073
Os12g0609050		Hypothetical conserved gene.		1.03406	0.92917	0.9183
Os10g0460900		Similar to cDNA clone:J013158D14, full insert sequence.		1.03198	0.774757	0.963525
Os03g0284400		Similar to Ribosomal protein L10-like.		1.03117	1.17391	0.880199
Os06g0705100		Similar to Thylakoid lumenal 13.3 kDa protein (P16.5) (Fragment).		1.03104	0.694471	0.847612
Os07g0680900	Signaling	Similar to Ribosomal protein S6 kinase.		1.30581	1.92963	1.35889
Os01g0805000		50S ribosomal protein L34.		1.03	0.834677	1.05537
Os02g0775300		Conserved hypothetical protein.		1.0266	0.891343	0.811189
Os01g0688600		Protein of unknown function DUF1639 family protein.		1.02592	0.944632	1.04952
Os07g0489800		Beta-grasp fold, ferredoxin-type domain containing protein.	0	1.02583	0.585959	0.773807
Os12g0580400		Similar to neutral amino acid transport protein.	OsPUT2, OsLAT7	1.02388	1.32124	0.748621
Os08g0557100		Similar to Nucleic acid-binding protein precursor.		1.02387	0.901722	0.984811
Os01g0884300		No apical meristem (NAM) protein domain containing protein.	OsNAC6	1.02331	1.00517	0.649691
Os01g0584250		Hypothetical gene.		1.02216	0.980159	0.928542
Os02g0302200		Similar to aminotransferase family protein.		1.02029	0.961816	1.03776
Os02g0161400		Non-protein coding transcript.		1.01628	0.77223	0.964232
Os04g0674000		Similar to H0403D02.10 protein.		1.01362	1.01031	0.932247
Os01g0228400		Pentatricopeptide repeat domain containing protein.		1.0133	0.904556	0.712272
Os09g0247700		Similar to Zinc finger, ZZ-type; Zinc finger, C2H2-type.		1.0129	1.21176	0.916702
Os10g0482000		Conserved hypothetical protein.		1.00862	0.615473	1.08219
Os03g0776100	Signaling	Hypothetical conserved gene.		1.04138	1.10918	1.03214
Os03g0659300		Zinc finger CCCH domain-containing protein 41	MKRN	1.00615	1.17007	0.680841
Os02g0689500		Similar to transposon protein.		1.00592	1.07853	0.905202
Os03g0854000		Butirosin biosynthesis, BtrG-like domain containing protein.		1.00583	0.844991	0.641119
Os03g0137600		Conserved hypothetical protein.		1.0055	0.862157	0.877497
Os07g0622000		Serine/threonine protein kinase, Hyperosmotic stress response, Abscisic acid (ABA)-dependent gene regulation	OsSAPK2	1.00543	0.481738	1.30317
Os04g0691600		Similar to 30S ribosomal protein S17.		1.0033	0.675244	0.798943
Os02g0123400		Hypothetical conserved gene.		0.999265	1.05924	0.987129
Os10g0574700		Protein of unknown function DUF597 family protein.		0.99402	1.2988	0.865776
Os06g0698500		Protein of unknown function DUF1336 domain containing protein.		0.993874	1.48188	0.857634
Os01g0882500		Similar to NADH dehydrogenase I subunit N.		0.9931	0.621676	0.834335
Os03g0191200		WW/Rsp5/WWP domain containing protein.		0.992532	1.09054	1.05748
Os07g0670300		C2 calcium-dependent membrane targeting domain containing protein.		0.992034	1.00064	0.7696
Os05g0517200		HAD-superfamily hydrolase subfamily IIB protein.	OsTPS6	0.990519	0.474446	0.60567
Os06g0663800		Similar to FKBP-type peptidyl-prolyl cis-trans isomerase 3, chloroplast precursor (EC 5.2.1.8) (PPIase) (Rotamase) (AtFKBP13) (FK506 binding protein 1).	OsFKBP13	0.988172	0.838191	0.848467
Os07g0406300		Similar to Glucose-6-phosphate 1-dehydrogenase.	OsG6PDH3	0.987817	0.819668	0.887925
Os03g0857000		Hypothetical conserved gene.		0.982945	0.601394	0.824192
Os10g0551200		Similar to Scl1 protein (Fragment).		0.9813	1.51368	0.997584
Os07g0105600		Photosystem II oxygen evolving complex protein PsbQ family protein.		0.974586	0.852537	0.846249
Os04g0601800		Similar to Plastid protein.		0.974081	0.827146	0.835667
Os02g0729400		Similar to Extracellular calcium sensing receptor.	OsStr11, OsCAS	0.973312	0.815844	0.860719
Os01g0589800		Similar to OHP2.		0.973285	0.841334	0.678705
Os05g0231700		Similar to Tonoplast intrinsic protein.	OsTIP4;1	0.973022	1.03639	1.01542
Os01g0131600		Hypothetical conserved gene.	OsAP2, OsERF108	0.97245	0.960971	1.03965
Os04g0565500		Similar to OSIGBa0158F05.8 protein.	OsANT4	0.969779	1.20287	0.877489
Os12g0507350		Non-protein coding transcript.		0.969334	1.0859	1.0852
Os03g0154100		Aromatic-ring hydroxylase family protein.		0.968853	1.16515	0.974657
Os04g0412300		Similar to H0717B12.10 protein.		0.968422	0.840822	0.692134
Os02g0537700		2-Cys peroxiredoxin (EC 1.11.1.15), Stomatal closure, Potassium deficiency tolerance	OsTPX	0.967729	0.758441	0.993172
Os09g0565200		Similar to Nucleic acid-binding protein precursor.	0	0.96495	0.78187	0.869512
Os10g0506900		Hypothetical conserved gene.		0.964822	0.505284	1.02302
Os04g0643600		Similar to Cyclic nucleotide-gated channel C (Fragment).	OsCNGC8	0.963471	1.05914	0.76732
Os04g0461100		Ribosomal protein, PSRP-3/Ycf65 domain containing protein.		0.958781	0.883638	0.916077
Os04g0669600		Phospholipase/carboxylesterase domain containing protein.		0.95774	1.09662	1.03806
Os01g0885200		Uncharacterised conserved protein UCP031277 domain containing protein.		0.955966	0.604123	0.854854
Os05g0163200		Non-protein coding transcript.		0.955787	1.1834	0.937551
Os03g0178066		Hypothetical gene.		0.954274	0.745832	0.812092
Os07g0673400		Rossmann-like alpha/beta/alpha sandwich fold domain containing protein.	OsUsp1	0.954166	0.700243	0.847182
Os12g0583900		Similar to PDE135 (PIGMENT DEFECTIVE EMBRYO 135); transmembrane transporter.		0.952526	0.839484	0.942929
Os12g0498500		Similar to DnaJ domain containing protein, expressed.		0.952343	0.624579	0.835711
Os04g0397500		Similar to gt-2-related.		0.95071	1.0152	0.986533
Os10g0523700		Prephenate dehydratase domain containing protein.	ADT	0.945778	0.881929	0.759404
Os06g0574100		Similar to predicted protein.		0.945777	0.841122	1.0948
Os02g0722700		Similar to Nucleic acid binding protein.		0.945441	0.67126	0.903349
Os04g0539000		Protein of unknown function DUF2485 domain containing protein.		0.945438	0.506949	0.83243
Os10g0492900		Similar to alpha-galactosidase.		0.945302	0.675347	0.992531
Os03g0331600		Uncharacterised protein family Ycf54 domain containing protein.	OsLCAA	0.945203	0.741193	0.975096
Os08g0484500		Similar to Phospho-2-dehydro-3-deoxyheptonate aldolase 1, chloroplast precursor (EC 2.5.1.54) (Phospho-2-keto-3-deoxyheptonate aldolase 1) (DAHP synthetase 1) (3-deoxy-D-arabino-heptulosonate 7-phosphate synthase 1).		0.944894	1.05688	0.80789
Os07g0110650		Hypothetical gene.		0.944768	0.912132	1.10419
Os04g0611300		Conserved hypothetical protein.		0.944716	1.07661	0.964686
Os04g0587400		Protein of unknown function DUF250 domain containing protein.	OsPUP6	0.944049	1.16314	0.767189
Os02g0224800		Ndr family protein.		0.943096	0.521221	1.00398
Os03g0184050		Non-protein coding transcript.		0.94228	0.786908	0.889188
Os04g0449900		Similar to RNA Binding Protein 47.		0.940938	0.989418	0.864393
Os01g0959900		Similar to predicted protein.		0.940525	0.589339	0.853825
Os01g0521500		Heat shock protein DnaJ family protein.	OsDjC8	0.93979	1.0577	0.904517
Os03g0125000		Similar to 50S ribosomal protein L5, chloroplast.	0	0.935884	0.648893	0.98096
Os01g0678600		Ribosomal protein S20 family protein.	0	0.935696	0.715037	0.959766
Os02g0313450		Conserved hypothetical protein.		0.935285	0.899487	1.01919
Os03g0751100		Iron-deficiency-regulated oligopeptide transporter, Iron homeostasis	OsOPT7	0.934777	1.37353	0.809928
Os01g0238200		Conserved hypothetical protein.		0.93358	1.03761	0.867668
Os03g0227700		Cytochrome P450 family protein.	OsDWARF4	0.933474	0.601701	0.790057
Os03g0345700		Similar to Heavy metal-associated domain containing protein, expressed.		0.931357	1.16286	0.750286
Os04g0665000		CHCH domain containing protein.		0.931085	1.08091	0.775813
Os09g0414600		Conserved hypothetical protein.	OsZHD9	0.929784	0.702269	0.56185
Os02g0328300		Phenol hydroxylase reductase family protein.		0.928694	0.63664	0.895894
Os04g0306400		Ribose 5-phosphate isomerase family protein.	OsRPI	0.927674	0.837697	0.939641
Os06g0647100		Similar to 50S ribosomal protein L35, chloroplast precursor (CL35).		0.927283	0.731105	0.812949
Os02g0700500		Polyamine uptake transporter, High-affinity spermidine transporter, Import of spermidine transported via phloem, Polyamine uptake	OsPUT1	0.927203	1.14897	1.34269
Os01g0710700		Lipase, class 3 family protein.	0	0.926239	0.60424	0.931633
Os10g0510000		Similar to actin.	RAc2	0.9251	1.21758	0.869095
Os07g0556200		Rieske [2Fe-2S] region domain containing protein.	PetC	0.922881	0.794685	0.788967
Os09g0249900		Similar to Ferredoxin-thioredoxin reductase catalytic chain.		0.921076	0.798911	0.791018
Os08g0530500		Conserved hypothetical protein.		0.920642	0.855325	1.13491
Os06g0114000		Hypothetical gene.	OsCPn60b1	0.920038	1.21294	0.722996
Os09g0434900		Zinc finger, RING-type domain containing protein.		0.91774	1.17864	0.970248
Os08g0152400		Similar to P450.		0.917572	0.707219	0.709622
Os01g0900800		Helix-loop-helix DNA-binding domain containing protein.	OsbHLH109	0.917249	0.60726	1.28951
Os12g0106700		Conserved hypothetical protein.		0.917182	0.552964	0.971635
Os11g0474100		Conserved hypothetical protein.		0.915925	0.814488	0.754934
Os10g0406300		Similar to AOBP (Ascorbate oxidase promoter-binding protein).	OsDof26	0.914101	0.631497	1.0035
Os11g0521500		Similar to Acyl carrier protein, chloroplast precursor (ACP) (ACP05) (Clone 29C08).		0.913318	0.97644	0.788889
Os03g0113500		Conserved hypothetical protein.		0.913277	1.25512	1.07457
Os01g0839700		Similar to Ubiquitin carrier protein.	OsUBC11	0.913186	0.820446	0.713703
Os02g0726600		Similar to tic20 protein-related.		0.910572	1.16554	0.708299
Os06g0699200		Metallophosphoesterase domain containing protein.		0.910106	0.781165	1.29851
Os03g0850600		Similar to Integral membrane protein.		0.907872	0.839291	0.775679
Os03g0195450		Similar to sulfate/bicarbonate/oxalate exchanger and transporter sat-1.		0.907836	0.945756	0.976638
Os03g0305100		Similar to AMP-binding protein.		0.906965	0.557084	0.668237
Os06g0332800		Similar to Bundle sheath defective protein 2.		0.906144	0.800791	0.795874
Os03g0104100		Protein phosphatase 2C, N-terminal domain containing protein.		0.905915	0.515	0.890982
Os01g0763300		Conserved hypothetical protein.		0.903531	1.01433	0.727544
Os03g0298600		Sel1-like domain containing protein.		0.903436	0.854019	0.803596
Os01g0107400		Conserved hypothetical protein.		0.90222	0.948501	0.850774
Os02g0125700		Similar to lil3 protein.		0.900617	0.777378	0.863175
Os07g0631900		Nucleotide-binding, alpha-beta plait domain containing protein.		0.900234	0.469773	1.19152
Os12g0124200		Similar to 40S ribosomal protein S16.		0.899009	1.38344	0.670699
Os08g0440100		Similar to Temperature stress-induced lipocalin.		0.898996	0.994518	0.73388
Os10g0163250		Hypothetical conserved gene.		0.897896	0.948409	0.971552
Os07g0570700		Ribosome recycling factor family protein.		0.897602	0.456251	0.97387
Os08g0263300		Similar to cDNA clone:J013108L16, full insert sequence.		0.895759	0.850876	0.845212
Os02g0532900		Glycoside hydrolase, family 17 protein.		0.895742	0.997739	0.717571
Os05g0528000		Similar to RbohAOsp (Fragment).	OsRbohC, OsNox5	0.89302	1.20357	0.865236
Os01g0871900		Similar to POT family protein.		0.89193	0.871326	0.901474
Os08g0561700		Similar to Superoxide dismutase.	OsSOD4, OsCSD4	0.891612	0.768745	0.857548
Os01g0913000		Similar to Thioredoxin F-type 2, chloroplast precursor (TRX-F2).	OsTRXh10, OsTRX2	0.889552	0.68572	0.783414
Os03g0221700		Serine/threonine protein kinase-related domain containing protein.		0.886823	0.893762	1.00466
Os04g0270200		Uncharacterised protein family UPF0172 domain containing protein.		0.886115	1.07969	0.875737
Os04g0355401		Hypothetical protein.		0.885387	0.567753	0.847353
Os03g0324300		Similar to ETHYLENE-INSENSITIVE3-like 1 protein.		0.884906	0.933964	0.909747
Os03g0772800		Cytochrome c oxidase, subunit VIa family protein.		0.884721	1.11035	0.65075
Os01g0667100		Similar to 60S ribosomal protein L18A.		0.884358	1.1004	0.830726
Os05g0571400		Protein of unknown function DUF3593 domain containing protein.		0.882403	0.789953	0.72009
Os01g0675700		Similar to Auxin-responsive protein IAA14 (Indoleacetic acid-induced protein 14) (SOLITARY-ROOT protein).	OsIAA5	0.882185	0.637459	0.906793
Os01g0782200		Diacylglycerol kinase, catalytic region domain containing protein.		0.882083	0.700295	0.879034
Os02g0751600		Peptidyl-prolyl cis-trans isomerase, FKBP-type domain containing protein.	OsFKBP16-2	0.882034	0.599565	0.890128
Os10g0479500		Similar to carboxy-lyase.	OsLOGL10	0.880472	0.400282	0.859266
Os02g0823000		Peptidase A22B, signal peptide peptidase domain containing protein.		0.879759	0.895744	0.773388
Os01g0749200		Chloroplast ribosome L13 protein, Chloroplast development under low temperature conditions	WLP1, RPL13	0.87953	0.570853	0.959006
Os06g0656500		4-coumarate:coenzyme A ligase, Lignin biosynthesis, Defense against wounding	Os4CL4	0.879108	0.526644	0.701644
Os05g0101600		Cytochrome P450 family protein.		0.879087	0.743692	0.758167
Os02g0779200		Similar to Subtilisin-like protease (Fragment).	OsSub22, OsSASP	0.878426	0.850307	0.900227
Os09g0113000		Conserved hypothetical protein.	0	0.877379	0.894637	0.624411
Os04g0405100		Similar to H0502B11.8 protein.		0.876323	0.82688	1.19841
Os05g0108000		tRNA pseudouridine synthase B family protein.		0.876298	0.702825	0.780422
Os03g0579000		Peptidase M50 domain containing protein.		0.874301	0.885984	0.799815
Os03g0247900		F5O11.14 (ACR8).	OsACR9	0.871433	1.06928	0.794873
Os02g0606200		Zinc finger, B-box domain containing protein.	OsBBX4, OsSTH	0.870493	0.557938	1.01604
Os07g0251200		Conserved hypothetical protein.		0.864347	1.05627	0.705394
Os01g0719100		Similar to RING finger and CHY zinc finger domain-containing protein 1.	OsRZFP34, OsRFP1	0.862777	0.832671	1.12593
Os11g0465200		Similar to Bx2-like protein.		0.86177	0.883118	0.856991
Os06g0479200		Conserved hypothetical protein.		0.860397	0.804993	0.756222
Os05g0128100		Hypothetical conserved gene.		0.859147	0.564828	0.697507
Os07g0191650		Similar to F-box domain containing protein, expressed.		0.857242	0.861116	0.780207
Os06g0143700		Similar to Sulfate transporter 2.	OsSultr3;4	0.856735	1.10517	1.11771
Os07g0189800		Similar to JHL07K02.7 protein.		0.856405	0.569873	0.758207
Os02g0639900		Similar to Thioredoxin M-type, chloroplast precursor (TRX-M).		0.856377	0.948538	0.62079
Os01g0922600		Similar to SBP-domain protein 4.	OsSPL2	0.85598	0.713844	0.668964
Os07g0185300		Protein of unknown function YGGT family protein.		0.855775	1.02648	0.607938
Os08g0231100		Hypothetical protein.		0.855718	0.52028	0.807242
Os02g0103800		Leaf-type ferredoxin-NADP+-oxidoreductase, Regulation of electron partitioning in the chloroplast	OsLFNR1	0.855423	0.609487	0.685074
Os05g0579600		Homeodomain-like containing protein.		0.85102	0.634424	0.633324
Os02g0435200		Hypothetical conserved gene.		0.850955	0.758583	0.753183
Os04g0517400		Similar to Plant glycogenin-like starch initiation protein (Fragment).		0.850267	0.906701	0.855292
Os02g0552550		Hypothetical gene.		0.849386	0.809991	0.744837
Os02g0185300		Cytochrome P450 family protein.		0.848038	0.939928	0.82636
Os02g0804400		Conserved hypothetical protein.		0.847675	0.746903	0.773974
Os01g0848900		Conserved hypothetical protein.		0.845332	0.593518	0.725703
Os01g0784800		Flavodoxin/nitric oxide synthase domain containing protein.		0.845318	1.24536	0.888014
Os08g0484700		Homeodomain-like containing protein.		0.843809	0.741978	0.864252
Os04g0405000		Similar to ATP-dependent Clp protease ATP-binding subunit.	OsClpD2	0.843619	0.620119	0.73268
Os07g0622200		3-Deoxy-D-arabino-heptulosonate 7-phosphate synthase, Chorismate biosynthesis	OsDAHP1	0.843405	0.748305	0.794041
Os03g0169800		HNH endonuclease domain containing protein.		0.842381	0.682895	0.916707
Os05g0318300		Ribonuclease III domain containing protein.		0.840035	0.519275	0.690973
Os01g0833200		Similar to expressed protein.		0.839769	0.520837	0.682811
Os10g0554100		Similar to Oxysterol-binding protein.		0.838883	0.956013	0.776373
Os12g0276100		Conserved hypothetical protein.		0.838727	0.754143	0.645264
Os07g0597100		Similar to Saccharopine dehydrogenase.		0.837373	1.16886	0.922611
Os05g0551801		Hypothetical gene.		0.83717	0.860847	0.958674
Os03g0196800		Similar to Cyanelle 30S ribosomal protein S10.		0.83711	0.634343	0.756787
Os03g0122200		Similar to 50S ribosomal protein L11.		0.836681	0.643471	0.780919
Os09g0422000		Transferase family protein.	HCT3	0.836374	0.686777	0.61241
Os05g0513350		Similar to predicted protein.		0.835219	0.827644	0.784985
Os06g0146400		FeS cluster insertion domain containing protein.	OsISC7	0.835127	1.00641	0.66534
Os12g0498300		WD40 repeat-like domain containing protein.		0.83494	0.816295	0.813761
Os09g0392000		Similar to mRNA, clone: RTFL01-05-M08.		0.833983	0.818953	0.874633
Os08g0484800		Hypothetical conserved gene.		0.832147	0.659059	0.793942
Os06g0185900		Similar to Glutathione peroxidase.	OsGPX4	0.830715	0.58237	0.739186
Os09g0428500		Conserved hypothetical protein.		0.830087	0.714658	0.876274
Os10g0493300		Hypothetical protein.		0.829672	0.744502	0.674677
Os06g0286400		Non-protein coding transcript.		0.82855	0.778369	0.864124
Os06g0638200		Uncharacterised protein family UPF0047 domain containing protein.		0.828016	0.478806	0.754426
Os06g0698600		Exo70 exocyst complex subunit family protein.	OsExo70G2	0.827366	0.564683	0.673355
Os01g0819500		Similar to Ubiquitin-conjugating enzyme E2-17 kDa 11 (EC 6.3.2.19) (Ubiquitin- protein ligase 11) (Ubiquitin carrier protein 11).	OsUBC22	0.826625	0.996572	0.668359
Os03g0132000		Similar to 4-coumarate-CoA ligase-like protein.	OsACS4	0.825859	0.517544	0.963837
Os06g0103400		Nucleic acid-binding, OB-fold domain containing protein.		0.824646	0.908691	0.828166
Os03g0324200		Transcription factor involved in the ethylene signal transduction pathway, Positive regulator of ethylene response, Wound signaling	OsEIL1, OsEIN3	0.823644	0.692246	0.77503
Os08g0127500		Acid phosphatase/vanadium-dependent haloperoxidase related family protein.		0.82347	0.874357	0.798102
Os05g0466700		Non-protein coding transcript.		0.823313	0.837148	0.843399
Os09g0560300		Conserved hypothetical protein.		0.822521	1.14674	0.622611
Os04g0449400		Similar to H0818E04.11 protein.	OsPP2C40, OsPP65	0.820825	0.991644	0.906469
Os03g0639600		Similar to Zinc-finger protein Lsd1.	OsLSD2	0.819918	0.835863	0.98418
Os08g0360100		RNA-binding, CRM domain domain containing protein.		0.817739	0.723872	0.740329
Os01g0186200		Similar to Phototropin.		0.817371	0.424932	0.796889
Os02g0784900		RmlC-like jelly roll fold domain containing protein.		0.81625	0.888233	0.759561
Os05g0196400		Conserved hypothetical protein.		0.815657	0.632868	0.883966
Os05g0497300		Similar to Ethylene response factor 2.	OsERF74	0.815433	1.00901	0.691841
Os03g0655700		Similar to 3-isopropylmalate dehydrogenase 2.		0.814572	1.01755	0.664497
Os09g0569100		Haloacid dehalogenase-like hydrolase domain containing protein.		0.814403	0.682083	0.646864
Os11g0104933		Non-protein coding transcript.		0.814226	1.01413	0.68986
Os09g0266000		Similar to predicted protein.		0.812747	0.697515	0.766423
Os05g0467300		SelT/selW/selH selenoprotein family protein.		0.811724	0.993873	1.03367
Os02g0823400		Similar to S-adenosyl-L-methionine: beta-alanine N-methyltransferase (Fragment).	OsCOMTL4	0.811386	0.764402	0.839909
Os09g0369050		Similar to DRE binding factor 2.		0.810571	0.961149	0.907116
Os09g0382500		Conserved hypothetical protein.	0	0.808862	1.11257	0.625178
Os11g0485500		Hypothetical protein.		0.806312	0.619453	0.676461
Os08g0564100		Similar to ATP-binding cassette, sub-family F, member 2 (Iron inhibited ABC transporter 2) (HUSSY-18).	OsABCF4	0.804283	0.78374	0.779786
Os02g0734400		Similar to ABA-induced protein.		0.803174	0.759326	1.14271
Os05g0406000		Conserved hypothetical protein.		0.801497	0.473711	0.917573
Os03g0723600		Conserved hypothetical protein.		0.800036	0.593535	0.674413
Os07g0185500		Non-protein coding transcript.		0.799337	0.940775	0.624684
Os08g0440300		Component of the CCR4-NOTcomplex, Deadenylase, Deadenylation (poly(A) tail shortening), Development and stress response		0.799062	0.71934	0.754091
Os07g0461900		Similar to Acetylornithine aminotransferase, mitochondrial precursor (EC 2.6.1.11) (ACOAT) (Acetylornithine transaminase) (AOTA).		0.798266	0.680739	0.70938
Os07g0682400		Nucleotide-binding, alpha-beta plait domain containing protein.	OsC3H53	0.797823	0.778599	0.531746
Os04g0691800		C2 domain containing protein.		0.795348	1.03781	0.906141
Os03g0229500		Similar to MATE efflux family protein, expressed.		0.795122	0.855288	0.95645
Os06g0646100		Conserved hypothetical protein.		0.793825	0.720207	0.636957
Os10g0188300		Similar to JHL05D22.13 protein.	OsNTP10	0.793332	0.803455	0.797138
Os05g0516300		Conserved hypothetical protein.		0.792432	0.526349	0.889369
Os07g0587400		Similar to Eukaryotic peptide chain release factor subunit 1-3 (eRF1-3) (Eukaryotic release factor 1-3) (Omnipotent suppressor protein 1 homolog 3) (SUP1 homolog 3).		0.791951	0.70863	0.794793
Os11g0685700		Similar to WRKY transcription factor 61.	OsWRKY61	0.791416	0.664964	0.730988
Os03g0808300		Remorin, C-terminal region domain containing protein.	OsREM4.2	0.790696	0.72657	0.779174
Os05g0200100		Similar to Thioredoxin-like 6.		0.790244	0.691494	0.62309
Os04g0436100		Thioesterase superfamily domain containing protein.		0.789508	0.923319	0.707125
Os03g0353400		Similar to Poly(A)-binding protein C-terminal interacting protein 6.	0	0.789007	0.891196	0.525455
Os03g0708500		Capsid/spike protein, ssDNA virus domain containing protein.	OsFKBP17-2	0.78817	0.53644	0.552313
Os01g0966700		Similar to Beta-fructofuranosidase (EC 3.2.1.26) (Fragment).		0.787574	0.675062	0.682023
Os05g0497675		Ribosomal L11 methyltransferase family protein.		0.787454	0.654775	0.686814
Os05g0490900		Conserved hypothetical protein.		0.786301	0.584301	0.679687
Os05g0499800		UDP-glucuronosyl/UDP-glucosyltransferase family protein.		0.784386	0.610184	0.732451
Os06g0717200		Serine/threonine protein kinase domain containing protein.	OsRLCK219	0.783826	1.13784	0.912054
Os04g0118400		Similar to Elongation factor EF-2 (Fragment).		0.783433	0.786532	0.627918
Os03g0341200		Conserved hypothetical protein.		0.782635	0.849111	0.671135
Os02g0223700		Protein of unknown function DUF3511 domain containing protein.		0.780424	0.877846	0.689745
Os02g0768950		Non-protein coding transcript.		0.779484	0.709464	0.774572
Os01g0945300		Amino acid/polyamine transporter I family protein.	OsBAT4	0.777596	0.800458	0.633459
Os01g0612800		Conserved hypothetical protein.		0.774534	1.05618	0.738797
Os01g0730800		Mpv17/PMP22 family protein.		0.773294	0.520248	0.843027
Os07g0131600		Similar to Monosaccharide transporter.		0.772627	0.740977	0.689588
Os11g0141800		Conserved hypothetical protein.		0.772535	0.878942	0.812501
Os03g0135400		Cyclin-like F-box domain containing protein.	OsFbox128	0.772182	0.488511	0.894004
Os05g0346901		Non-protein coding transcript.		0.771816	0.670765	0.797468
Os04g0667800		Ubiquitin-conjugating enzyme (EC 6.3.2.19) (Ubiquitin carrier protein).	Dhr6, OsUBC5b	0.771637	0.728975	0.811131
Os01g0106750		Non-protein coding transcript.		0.77074	0.781483	0.824518
Os05g0188100		Conserved hypothetical protein.		0.770016	0.617323	0.612775
Os04g0493000		Similar to H0425E08.14 protein.	OsBBX11, OsSTO	0.766633	0.989394	0.665004
Os05g0106600		Similar to Actin 97.		0.763551	0.909986	0.732711
Os10g0563600		Similar to Peptide methionine sulfoxide reductase (EC 1.8.4.6) (Protein- methionine-S-oxide reductase) (Peptide Met(O) reductase).	OsMSRA4	0.763378	0.664726	0.639413
Os02g0567100		Thioredoxin domain 2 containing protein.		0.757679	0.483814	0.492151
Os09g0536400		Similar to Thaumatin-like protein 1 precursor.		0.757511	0.409139	0.686616
Os03g0856100		Pentatricopeptide repeat domain containing protein.		0.756864	0.597403	0.864163
Os01g0963400		Thioredoxin family protein.		0.754689	0.785809	0.622643
Os03g0651000		Glu-tRNAGln amidotransferase, C subunit family protein.		0.75329	0.712544	0.615489
Os01g0513100		Similar to Protein phosphatase 2C ABI2.	OsPP2C3	0.75288	0.801329	0.732292
Os07g0438550		Similar to salt-inducible protein kinase.		0.752204	0.783842	0.738112
Os01g0805300		Mog1/PsbP, alpha/beta/alpha sandwich domain containing protein.	PsbP	0.750769	0.667803	0.813414
Os03g0577200		Similar to Mps one binder kinase activator-like 1A (Mob1 homolog 1A) (Mob1A) (Mob1B) (Protein Mob4A).		0.750645	0.787188	0.667587
Os03g0847851		Non-protein coding transcript.		0.749992	0.758542	0.679923
Os04g0648900		Similar to Dehydration responsive element binding protein 2F (DREB2F protein).	OsERF8	0.749583	0.602783	0.976991
Os01g0692700		Similar to Protein binding protein.	OsRFPH2-23	0.749531	0.576166	0.638902
Os07g0569600		Chaperonin-like RbcX domain containing protein.		0.749142	0.627786	0.703387
Os01g0960000		Gamma-secretase aspartyl protease complex, presenilin enhancer-2 subunit domain containing protein.		0.748842	0.828361	0.738636
Os04g0311500		Non-protein coding transcript.		0.748392	0.655392	0.87998
Os01g0741900		Auxin-responsive protein, Drought tolerance, Control of tiller outgrowth	OsIAA6	0.746228	0.609877	0.572644
Os05g0229000		Non-protein coding transcript.		0.745507	0.449452	0.885395
Os09g0369400		Similar to predicted protein.	OsTPP7	0.745398	1.44702	0.705759
Os12g0566200		Conserved hypothetical protein.		0.745243	0.74465	0.713719
Os12g0615400		Similar to 37 kDa inner envelope membrane protein, chloroplast precursor (E37).	0	0.74469	0.716962	0.626002
Os08g0464400		Zinc finger, RING/FYVE/PHD-type domain containing protein.		0.744085	0.765091	0.747196
Os09g0437500		Dormancyauxin associated family protein.		0.74225	0.783068	0.739328
Os12g0514400		Potyvirus VPg interacting protein (Fragment).		0.73815	0.957399	0.645641
Os07g0517100		Heat shock protein Hsp20 domain containing protein.		0.737677	0.596847	0.663866
Os10g0580800		Similar to NClpP4 (Fragment).	OsClpP4	0.737294	0.825953	0.666902
Os12g0616800		Protein of unknown function DUF761, plant domain containing protein.		0.737257	0.707175	1.15703
Os08g0308700		Similar to DCL protein.	Cen8.t00793	0.735803	0.847909	0.634068
Os08g0161700		NADH dehydrogenase [ubiquinone] (complex I), iron-sulphur protein 6, mitochondria domain containing protein.		0.735413	0.847027	0.679931
Os01g0640700		Similar to vegetative cell wall protein gp1.		0.735237	0.986748	0.578302
Os03g0108700		Conserved hypothetical protein.		0.732913	0.928753	0.711597
Os02g0115600		S1, RNA binding domain containing protein.		0.732898	0.650285	0.694744
Os03g0194500		Similar to Protein translocase/ protein transporter.		0.732355	1.07978	0.751589
Os03g0701700		Similar to Ethylene receptor.	OsERS1	0.731587	0.742031	0.670089
Os01g0776700		Similar to predicted protein.		0.730595	0.838575	0.786967
Os02g0614200		Conserved hypothetical protein.		0.730372	0.931961	0.920434
Os02g0651300		Similar to OR.		0.728391	0.388626	0.881832
Os04g0553000		Similar to OSIGBa0143N19.6 protein.	OsABCI10	0.727775	0.742901	0.678888
Os01g0688200		Similar to hydrolase, alpha/beta fold family protein.		0.72713	0.649285	0.853235
Os02g0624400		Glycosyl transferase, family 8 protein.		0.726498	0.68316	0.876402
Os12g0552500		Rossmann-like alpha/beta/alpha sandwich fold domain containing protein.		0.725784	0.950663	0.769237
Os02g0817600		AUX/IAA protein family protein.		0.723601	0.647307	0.826424
Os01g0106800		Similar to RING-box protein 1A (Regulator of cullins 1a) (dRbx1).	OsRBX1b	0.722431	0.846554	0.689898
Os02g0828200		TPR-like domain containing protein.		0.721265	0.497271	0.644779
Os03g0360700		Similar to Protein-methionine-S-oxide reductase, PilB family.	OsMSR1	0.721054	0.59015	0.604079
Os06g0502900		Similar to DGCR14 protein.		0.720943	0.599546	0.642277
Os05g0116100		Dehydroascorbate reductase.	OsDHAR1	0.71964	0.874809	0.733863
Os01g0911000		Sas10/Utp3/C1D domain containing protein.		0.719416	1.07811	1.11442
Os06g0663400		Serine/thronine protein kinase-like protein.	OsDPK3	0.719132	0.827996	0.804844
Os10g0515200		Cytochrome P450 family protein.		0.71877	0.965864	0.597652
Os05g0526200		Similar to Calcium homeostasis regulator CHoR1.		0.718206	0.665169	0.812048
Os06g0645700		Similar to HAF1.	OsHAF701	0.717762	0.68142	0.72981
Os05g0393100		Leucine-rich repeat, N-terminal domain containing protein.		0.717064	0.79802	0.77929
Os02g0565000		Homeodomain-like containing protein.		0.715576	0.787933	0.668967
Os03g0342900		Dormancyauxin associated family protein.		0.712714	0.805009	0.353066
Os11g0448400		RNA polymerase sigma factor, region 2 domain containing protein.	OsSIG2A	0.712018	0.495702	0.87505
Os01g0781000		Vacuolar protein sorting-associated, VPS28 family protein.		0.712002	0.693781	0.586229
Os11g0684000		Similar to Transcription factor MYB21 (Myb-related protein 21) (AtMYB21) (Myb homolog 3) (AtMyb3).	OsJAmyb	0.710598	1.05602	0.757619
Os02g0817500		Potassium channel, voltage-dependent, beta subunit, KCNAB-related domain containing protein.	KOB1	0.710004	0.660007	0.712467
Os05g0550000		Similar to protein binding protein.	OsRFPH2-20	0.707129	0.510772	0.752968
Os01g0708400		Non-protein coding transcript.		0.706319	0.719314	0.842912
Os02g0190000		Putative uncharacterized protein.		0.70565	0.744257	1.12591
Os10g0518150		Non-protein coding transcript.		0.704059	0.877722	0.692502
Os05g0100366		Non-protein coding transcript.		0.703412	0.826388	0.613921
Os08g0413500		Hypothetical conserved gene.		0.703329	0.506531	0.695432
Os03g0124300		Similar to ATP binding protein.		0.702428	0.662763	0.683712
Os11g0272800		Similar to Ulp1 protease family, C-terminal catalytic domain containing protein, expressed.		0.701055	0.562687	0.690097
Os01g0853800		C2 calcium-dependent membrane targeting domain containing protein.		0.700754	0.767522	0.621414
Os06g0111500		Cytosolic 6-phosphogluconate dehydrogenase.	Os6PGDH1	0.700705	0.939815	0.701889
Os05g0548100		Similar to VIP1 protein.		0.699633	0.852755	0.634474
Os03g0650850		Non-protein coding transcript.		0.697268	0.656589	0.569088
Os12g0183300		Similar to 3'(2'), 5'-bisphosphate nucleotidase.	RHL	0.693206	0.825713	0.744299
Os05g0147100		Conserved hypothetical protein.		0.692093	0.732404	0.721648
Os04g0108300		Protein of unknown function DUF177 family protein.		0.692049	0.638445	0.695657
Os04g0390000		Similar to OSIGBa0096P03.7 protein.		0.690679	0.545785	0.793821
Os02g0657700		Uncharacterised conserved protein UCP012943 domain containing protein.		0.690403	0.542098	0.699728
Os03g0818300		Zinc finger, RING/FYVE/PHD-type domain containing protein.		0.689062	0.638499	0.586582
Os03g0681750		Hypothetical gene.		0.688603	0.675977	0.718986
Os07g0483400		Protein of unknown function DUF2365 domain containing protein.		0.687492	0.854617	0.753484
Os03g0756800		Uncharacterised protein family UPF0139 domain containing protein.		0.686988	0.505462	0.689902
Os05g0302600		TRAM, LAG1 and CLN8 homology domain containing protein.		0.686767	0.608292	0.657393
Os08g0338600		Conserved hypothetical protein.		0.685748	0.900472	0.694924
Os02g0192100		Conserved hypothetical protein.		0.685583	0.765218	0.689297
Os03g0187200		Non-protein coding transcript.		0.683899	0.936223	0.78015
Os01g0192000		CCCH-type zinc finger protein, Negative regulator for leaf senescence	OsDOS, OsC3H2, OsTZF2	0.683889	1.18888	0.726004
Os03g0210700		Conserved hypothetical protein.		0.683569	0.52426	0.59845
Os12g0233300		Histidine triad (HIT) protein family protein.		0.683169	0.414387	0.76159
Os03g0656900		Plastid RNA-binding protein, Regulation of chloroplast RNA metabolism, Early chloroplast development under cold stress	NUS1	0.680903	0.577699	0.786215
Os11g0704600		Similar to Beta-1, 3 glucanase precursor (EC 3.2.1.39).		0.680412	0.717498	0.718846
Os06g0360300		NAD(P)-binding domain containing protein.		0.679749	0.75836	0.615718
Os07g0236700		Zinc finger, Dof-type domain containing protein.		0.679279	0.702383	0.696064
Os03g0206600		Uncharacterised protein family UPF0497, trans-membrane plant domain containing protein.		0.679017	0.83066	0.706666
Os04g0403300		Similar to Alpha-amylase.		0.678636	0.634854	0.504293
Os03g0809100		Major facilitator superfamily protein.		0.678026	0.432895	0.719963
Os02g0643500		Pentapeptide repeat containing protein.		0.676683	0.522435	0.644078
Os03g0161500		EGF domain containing protein.		0.675018	0.525772	0.605817
Os08g0179900		Uncharacterised conserved protein UCP012943 domain containing protein.		0.674274	0.54236	0.702891
Os01g0372700		Similar to Asparaginyl-tRNA synthetase, cytoplasmic 1 (EC 6.1.1.22) (Asparagine-- tRNA ligase 1) (AsnRS 1).		0.67403	1.17331	0.697807
Os03g0390600		Similar to Histone H3 (Fragment).	0	0.670545	0.716661	0.515732
Os02g0160000		Similar to Kluyveromyces lactis strain NRRL Y-1140 chromosome B of strain NRRL Y- 1140 of Kluyveromyces lactis.		0.670532	0.740654	0.939942
Os01g0856800		Similar to pleckstrin homology domain-containing protein 1.		0.669938	0.946506	0.579925
Os01g0271400		Peptidase S14, ClpP family protein.	OsClp1	0.669419	0.613434	0.608999
Os05g0555300		Similar to electron carrier/ electron transporter/ iron ion binding protein.	0	0.66877	0.478406	0.554852
Os02g0610800		Protein of unknown function DUF1092 family protein.		0.668095	0.481385	0.521943
Os03g0231600		Similar to Branched-chain-amino-acid aminotransferase 3, chloroplast precursor (EC 2.6.1.42) (Atbcat-3).		0.667957	0.812253	0.732516
Os04g0606700		Similar to OSIGBa0113I13.5 protein.		0.667652	0.567679	0.650029
Os01g0919900		Similar to Acyl-[acyl-carrier-protein] desaturase, chloroplast precursor (EC 1.14.19.2) (Stearoyl-ACP desaturase) (Delta(9) stearoyl-acyl carrier protein desaturase).	OsSSI2	0.666696	0.691854	0.552485
Os06g0724400		Zinc finger, Zim17-type family protein.	OsDNLZ1	0.666129	0.777992	0.478753
Os02g0503400		Similar to 60S ribosomal protein L35.	OsRPL35	0.665653	0.88882	0.576443
Os02g0572900		Zinc finger, C2H2-type domain containing protein.		0.665507	0.862219	0.66716
Os02g0170500		Histone-fold domain containing protein.	OsHAP5A, OsNF-YC1	0.664472	0.57726	0.59091
Os05g0122900		BLE1 protein.	OsBLE1	0.663618	0.729992	0.625528
Os03g0431100		Conserved hypothetical protein.		0.663496	0.73143	0.549987
Os02g0465000		Similar to DNA repair protein RAD23.		0.662727	0.536044	0.771882
Os02g0178400		Protein transport protein SEC61 gamma subunit.		0.660924	1.02731	0.606741
Os03g0407000		von Willebrand factor, type A domain containing protein.		0.659828	0.870571	0.849135
Os09g0392666		Conserved hypothetical protein.		0.659704	0.646043	0.655352
Os01g0767000		Similar to Nuclear matrix constituent-like protein (Fragment).		0.659541	0.388245	0.689213
Os04g0105700		Similar to B0616E02-H0507E05.5 protein.		0.659503	0.565012	0.638074
Os08g0564500		Zinc finger, U1-type domain containing protein.		0.657133	0.995536	0.591486
Os04g0535600		Similar to Beta-fructofuranosidase 1 precursor (EC 3.2.1.26) (Sucrose 1) (Invertase 1).	OsINV2, OsVIN1	0.657038	0.654059	0.611433
Os02g0734900		Similar to Erwinia induced protein 2.		0.654084	0.784387	0.71648
Os06g0731400		Hypothetical conserved gene.		0.654024	0.522959	0.694043
Os02g0678400		NAD(P)-binding domain containing protein.		0.653523	0.501181	0.590089
Os02g0226350		Non-protein coding transcript.		0.653164	0.707189	0.96594
Os11g0425800		Similar to 60S ribosomal protein L13a.		0.650343	0.463055	0.760128
Os08g0191100		Similar to Iron-responsive element binding protein (Fragment).	OsACO1	0.649263	0.77916	0.566282
Os09g0513000		Similar to TGB12K interacting protein 3.		0.649083	0.786505	0.705837
Os03g0711500		Similar to cDNA clone:J023075G08, full insert sequence.	OsWD40-85	0.647717	0.625968	0.62971
Os03g0187600		GRAM domain containing protein.		0.646419	0.911162	0.820162
Os03g0830900		Lipase, class 3 family protein.		0.64607	0.516603	0.883922
Os02g0478600		Similar to 40S ribosomal protein S15A.		0.644158	0.9082	0.559092
Os07g0163000		Similar to FAD linked oxidase family protein.		0.64399	0.489971	0.661474
Os07g0422000		Similar to predicted protein.	FLL2	0.64397	0.408916	0.645339
Os03g0376600		Similar to 29 kDa ribonucleoprotein, chloroplast precursor (RNA-binding protein cp29).		0.642543	0.715943	0.653146
Os01g0626200		Clathrin adaptor, beta-adaptin, appendage, C-terminal subdomain domain containing protein.		0.641364	0.690561	0.59272
Os04g0692500		Similar to antiporter/ drug transporter/ transporter.		0.64091	0.538894	0.567882
Os02g0280000		Hypothetical gene.		0.640308	0.739991	0.573447
Os03g0681300		Similar to SABRE.		0.639894	0.672411	0.610681
Os06g0472000		Methionine sulphoxide reductase B domain containing protein.		0.638734	0.547988	0.641194
Os03g0408500		Similar to Transcription initiation factor IID, 31kD subunit family protein, expressed.		0.637465	0.639872	0.543002
Os03g0693400		Protein of unknown function DUF538 family protein.		0.637282	1.05743	0.802881
Os08g0480500		Similar to surfeit locus protein 5.		0.637053	0.678535	0.546442
Os02g0580300		Similar to 14-3-3 protein 6.	OsGF14e, OsGID2	0.636838	0.558198	0.696315
Os08g0522500		Glycoside hydrolase, family 19 protein.		0.63614	0.627483	0.635257
Os02g0128100		Hypothetical conserved gene.		0.636012	0.584297	0.748576
Os10g0185100		Conserved hypothetical protein.		0.634672	0.45698	0.581692
Os02g0759900		Similar to threonine endopeptidase.		0.634479	0.531568	0.582023
Os03g0707250		Non-protein coding transcript.		0.63445	0.457018	0.643315
Os03g0298300		Uncharacterised protein family UPF0497, trans-membrane plant domain containing protein.		0.634345	0.763676	0.693882
Os11g0139800		Non-protein coding transcript.		0.633701	0.741914	0.602563
Os05g0427200		Similar to Beta-1, 3-galactosyltransferase sqv-2.		0.633479	0.550194	1.36078
Os02g0498700		Similar to QUA1 (QUASIMODO 1); polygalacturonate 4-alpha-galacturonosyltransferase/ transferase, transferring glycosyl groups / transferase, transferring hexosyl groups.		0.632814	0.638015	0.770984
Os08g0274700		Similar to TTN10.	PSF3	0.632401	0.655473	0.540721
Os09g0338400		Similar to Cysteine desulfurase, mitochondrial precursor (EC 2.8.1.7) (m-Nfs1).	OsISC1	0.630876	0.667736	0.705514
Os03g0206900		Zinc finger, RING/FYVE/PHD-type domain containing protein.		0.630851	0.508555	0.740339
Os12g0277500		Plastid chaperonin 60 alpha subunit, Folding of Rubisco large subunit (rbcL), Seedling development	OsCPn60a1	0.630665	0.796736	0.675783
Os07g0622900		Endoplasmic reticulum (ER) membrane protein, Early tapetum development and meiosis		0.629948	1.10515	0.671234
Os05g0397650		Similar to zinc finger (C3HC4-type RING finger) family protein.	OsRFPHC-8	0.629761	0.921569	0.750704
Os01g0141100		Similar to Salt-induced AAA-Type ATPase.	OsSKD1	0.629351	0.734526	0.606891
Os10g0317300		Conserved hypothetical protein.		0.628454	0.602788	0.525348
Os02g0726300		Similar to AOBP (Ascorbate oxidase promoter-binding protein).	OsDof4	0.627811	0.501646	0.471229
Os12g0570000		Armadillo-like helical domain containing protein.	spl11, OsPUB11	0.627786	0.722962	0.586072
Os03g0695500		Similar to predicted protein.		0.627763	0.484946	0.553584
Os04g0472400		Similar to RNA recognition motif family protein.		0.627075	0.49535	0.611451
Os03g0855600		Similar to DANA2.		0.625695	0.749779	0.569259
Os04g0470100		Similar to Small GTP binding protein Rab2.	OsRab2	0.625502	0.432759	0.733547
Os12g0623600		Protein of unknown function DUF1637 family protein.		0.625193	0.646817	0.761203
Os04g0672800		Similar to H0322F07.5 protein.		0.624995	0.508479	0.783274
Os06g0475500		Conserved hypothetical protein.		0.624736	0.508065	0.711159
Os08g0155700		Similar to DNA-directed RNA polymerase (Fragment).		0.623697	0.465257	0.669932
Os03g0267300		Similar to Fructose-1, 6-bisphosphatase, chloroplast precursor (EC 3.1.3.11) (D- fructose-1, 6-bisphosphate 1-phosphohydrolase) (FBPase).	OsCFR	0.623335	0.477699	0.551866
Os02g0680600		Similar to 2-C-methyl-D-erythritol 2, 4-cyclodiphosphate synthase, chloroplast precursor (EC 4.6.1.12) (MECPS) (MECDP-synthase).	OsMCS	0.623061	0.585892	0.480778
Os03g0360500		Protein of unknown function DUF1077 family protein.		0.622075	0.803655	0.605388
Os02g0187500		Uncharacterised protein family UPF0047 domain containing protein.		0.620284	0.598764	0.477738
Os10g0154000		Membrane-trafficking protein, Intracellular SNARE protein, Resistance to rice blast disease		0.619674	0.7158	0.636263
Os03g0794900		Frigida-like family protein.		0.618693	0.383438	0.644878
Os03g0610800		Similar to Protein zx.	OsSRP-FRS	0.61815	0.87551	0.756955
Os08g0439200		Non-protein coding transcript.		0.617969	0.387696	0.783335
Os04g0431300		Acyl-CoA N-acyltransferase domain containing protein.		0.617753	0.823269	0.720498
Os10g0545200		Similar to 4, 4-dimethyl-sterol C4-methyl-oxidase (Fragment).	OsGL1-10	0.617578	0.493822	0.582948
Os09g0530600		Zinc finger, CCCH-type domain containing protein.		0.617043	0.618483	0.493875
Os08g0412401		Similar to Adenosine 5'-phosphosulfate reductase-like.	OsAPRL4	0.616589	0.582068	0.687918
Os07g0580900		Similar to GGDP synthase.	OsGGPPS1	0.615618	0.457126	0.46718
Os03g0104000		Similar to Viral A-type inclusion protein repeat containing protein, expressed.		0.614912	0.589948	0.709434
Os05g0140500		RNA binding motif protein 8 family protein.	OsY14a	0.613062	0.703947	0.663134
Os03g0226700		Conserved hypothetical protein.		0.612186	0.864034	0.601716
Os05g0533700		NADH-ubiquinone oxidoreductase subunit PSST (Fragment).		0.610808	0.837355	0.573202
Os02g0603900		Hypothetical protein.		0.609894	0.598494	0.502773
Os07g0646000		Conserved hypothetical protein.		0.609421	0.785696	0.565618
Os06g0219700		Similar to TA2 protein (Fragment).	OsFbox304	0.609122	0.415555	0.691236
Os03g0744600		Similar to Ripening-associated protein (Fragment).		0.608747	0.435819	0.5491
Os04g0571800		Zinc finger, RING/FYVE/PHD-type domain containing protein.		0.607641	0.764272	0.796116
Os05g0357200		Adenine nucleotide translocator 1 domain containing protein.		0.605348	0.352194	0.693544
Os05g0213500		Rice orthologue of the abscisic acid (ABA) receptor, Positive regulator of the ABA signal transduction pathway, Abiotic stress tolerance	OsPYL5	0.602366	0.511308	0.757911
Os07g0572000		WD40/YVTN repeat-like domain containing protein.	OsWD40-144	0.6011	0.782347	0.74281
Os03g0146500		Similar to (RAP Annotation release2) Galactose-binding like domain containing protein.		0.600864	0.462255	0.48639
Os01g0732200		GTP-binding protein, HSR1-related domain containing protein.		0.599157	0.486549	0.675419
Os03g0146600		Similar to HEAT repeat family protein, expressed.		0.599052	0.663104	0.601226
Os02g0655300		Similar to 3-isopropylmalate dehydratase, small subunit.		0.599032	0.747774	0.458999
Os01g0660900		Similar to phosphoglycerate mutase family protein.		0.59894	0.605255	0.542736
Os02g0182800		Similar to NTH23 protein.	0	0.598265	0.494279	0.695402
Os01g0925200		Similar to Enoyl CoA hydratase-like protein.		0.598063	0.77164	0.617375
Os05g0536200		Voltage-dependent anion channel.	OsVDAC2	0.596114	0.799799	0.622058
Os07g0179500		Hypothetical conserved gene.		0.594078	0.467843	0.668441
Os08g0425800		Similar to DRP2 protein (Fragment).	0	0.593211	0.873571	0.63153
Os09g0455400		Similar to Heat shock protein.		0.591675	0.544641	0.700419
Os03g0106000		Uncharacterised protein family UPF0187 domain containing protein.		0.591631	0.597803	0.500213
Os01g0899200		Similar to dehydration-responsive family protein.		0.589114	0.64276	0.585543
Os02g0664000		Similar to Phospholipid hydroperoxide glutathione peroxidase, chloroplast precursor (EC 1.11.1.12) (PHGPx).	OsGpx3	0.588185	0.680733	0.535855
Os03g0738300		Hypothetical protein.		0.586481	0.631831	0.64909
Os04g0610800		Similar to Coproporphyrinogen III oxidase (Fragment).		0.584998	0.60344	0.615387
Os02g0529400		Plant neutral invertase family protein.	OsNIN3	0.582838	0.59985	0.537069
Os07g0680300		Similar to Ubiquinol-cytochrome c reductase complex 6.7 kDa protein (EC 1.10.2.2) (CR6).		0.581857	0.99001	0.57768
Os01g0266600		Thioredoxin fold domain containing protein.		0.581442	0.504416	0.537973
Os10g0564000		K Homology, type 1, subgroup domain containing protein.		0.581271	0.724635	0.692653
Os01g0874700		GOLD domain containing protein.		0.581191	0.663565	0.552385
Os08g0127300		Conserved hypothetical protein.		0.579666	0.569643	0.706354
Os05g0530500		Similar to OSK1.		0.57897	0.630605	0.52411
Os01g0694300		Similar to T17H3.9.		0.578395	0.570905	0.737143
Os08g0137200		Actin/actin-like family protein.		0.57766	0.629394	0.576599
Os05g0323900		Manganese superoxide dismutase, Heat-stress tolerance		0.577183	0.761423	0.464028
Os10g0536000		Similar to SUMO E2 conjugating enzyme SCE1.	OsSce1, OsUBC1	0.577172	0.681542	0.550192
Os03g0115200		Similar to Partner of Nob1; Pno1p; Yor145cp like KH domain containing protein, transcripts identified by EST.		0.576143	0.540292	0.6774
Os11g0110901		Hypothetical conserved gene.		0.573921	0.568162	0.653433
Os08g0414600		Six-bladed beta-propeller, TolB-like domain containing protein.		0.573861	0.502078	0.577342
Os08g0383700		Similar to Repressor protein.		0.572676	0.629405	0.592431
Os02g0606000		Glycine-rich protein (GRP), Regulation of chloroplast development at early leaf stage	OsDG2	0.570981	0.468555	0.752843
Os07g0260300		Thioredoxin fold domain containing protein.		0.569174	0.371679	0.526247
Os09g0123200		FCA-like protein, FCA gamma protein, Flowering time related protein involved in autonomous flowering pathway	OsFCA	0.568542	0.505145	0.470306
Os08g0397900		Uncharacterised conserved protein UCP009193 domain containing protein.		0.567726	0.393519	0.487124
Os05g0402300		Uncharacterised protein family UPF0005 domain containing protein.		0.566631	0.748273	0.621539
Os11g0163100		Similar to Actin 7 (Actin 2).	0	0.566503	0.39113	0.623583
Os05g0100800		Nucleic acid-binding, OB-fold domain containing protein.		0.566299	0.512221	0.632837
Os01g0948300		Cellular retinaldehyde-binding/triple function, C-terminal domain containing protein.		0.565185	0.632936	0.541393
Os12g0567200		Non-protein coding transcript.		0.563735	0.771971	0.532256
Os03g0284600		Thioredoxin-like fold domain containing protein.		0.56372	0.421239	0.585452
Os03g0123100		Similar to SUMO E2 conjugating enzyme SCE1.	OsSce2, OsUBC2	0.561838	0.570647	0.765191
Os06g0238300		FMN-binding split barrel domain containing protein.		0.561344	0.409497	0.624111
Os10g0406400		Similar to Cellulose synthase-like A1.	OsCSLA2	0.561078	0.440017	0.53909
Os09g0568000		Single-stranded nucleic acid binding R3H domain containing protein.		0.560881	0.449924	0.547225
Os05g0335100		Saposin-like domain containing protein.		0.559567	0.448431	0.612165
Os07g0669600		Conserved hypothetical protein.		0.559432	0.599209	0.669906
Os03g0277100		HSP20-like chaperone domain containing protein.		0.558736	0.470194	0.388504
Os12g0222650		Hypothetical gene.		0.558448	0.498434	0.681521
Os02g0557700		Short-chain dehydrogenase/reductase SDR domain containing protein.		0.557801	0.458129	0.46048
Os04g0675300		Zinc finger, RING/FYVE/PHD-type domain containing protein.		0.556668	0.566972	0.502922
Os02g0750600		Membrane-anchored ubiquitin-fold protein, HCG-1 domain containing protein.		0.55656	0.529078	0.557328
Os05g0411600		Similar to nucleic acid binding protein.		0.556264	0.452513	0.577553
Os04g0431000		Conserved hypothetical protein.		0.554042	0.543008	0.665861
Os02g0803400		Vacuolar protein sorting 55 family protein.		0.552926	0.710434	0.62702
Os01g0908700		Similar to Hnrpa2b1-prov protein.	OsRFP	0.552159	0.608491	0.643631
Os07g0300900		Similar to Aspartokinase.		0.55196	0.508444	0.510683
Os07g0619200		EF hand domain containing protein.		0.549707	0.528414	0.603948
Os02g0202500		Similar to nucleic acid binding.		0.546823	0.841981	0.513729
Os01g0728400		Conserved hypothetical protein.		0.546368	0.645411	0.431636
Os09g0553300		NUDIX hydrolase domain containing protein.		0.544415	0.432057	0.755179
Os01g0234900		Similar to Ubiquitin ligase SINAT5 (EC 6.3.2.-) (Seven in absentia homolog 5). Splice isoform 2.	OsRFPHC-14, OsSTA9	0.543901	0.580256	0.47942
Os11g0546900		Similar to TaWIN1.	OsGF14d	0.543859	0.529809	0.570601
Os04g0646100		Similar to cDNA clone:J013093N15, full insert sequence.		0.540243	0.675404	0.628801
Os02g0797600		Conserved hypothetical protein.		0.540135	0.523391	0.560205
Os09g0416800		Component of the CCR4-NOTcomplex, Deadenylase, Deadenylation (poly(A) tail shortening), Development and stress response		0.539514	0.448032	0.63289
Os10g0569000		Hypothetical conserved gene.		0.538809	0.545229	0.474516
Os10g0213100		Similar to Gamma-aminobutyrate transaminase subunit isozyme 3 (EC 2.6.1.19).		0.537593	0.496414	0.651805
Os09g0115500		Proteinase inhibitor I3, Kunitz legume domain containing protein.	OsCBSX2	0.536133	0.645218	0.573565
Os06g0555400		Similar to 40S ribosomal protein S19-like.		0.534546	0.872627	0.590432
Os08g0444100		Similar to Splicing factor 3b, subunit 5 (Splicing factor 3B subunit 10).		0.534015	0.746968	0.440561
Os11g0528300		Protein of unknown function DUF339 family protein.		0.53316	0.677497	0.514361
Os02g0310200		Conserved hypothetical protein.		0.531902	0.466227	0.489645
Os12g0564400		Similar to Thylakoid lumenal 21.5 kDa protein, chloroplast precursor.	PsbP	0.531899	0.512749	0.466845
Os12g0131000		Hypothetical conserved gene.		0.531794	0.522055	0.634621
Os05g0565000		Similar to 60S ribosomal protein L18a-1.	rpl18a	0.531758	1.11899	0.545507
Os05g0126300		Conserved hypothetical protein.		0.531606	0.474195	0.592066
Os12g0175500		Similar to Glutaredoxin-like protein.	OsGRX27	0.530936	0.580142	0.449512
Os02g0510100		Similar to U6 snRNA-associated Sm-like protein LSm6 (Sm protein F).	OsCYP-7	0.530639	0.710216	0.468747
Os11g0638900		Armadillo-type fold domain containing protein.		0.526017	0.415908	0.676678
Os03g0286300		Similar to Phosphate/phosphoenolpyruvate translocator protein-like.		0.524822	0.842217	0.473681
Os02g0199900		Similar to 26S proteasome regulatory complex subunit p42D.	OsRpt4a	0.524679	0.755495	0.523546
Os08g0433600		Protein of unknown function DUF962 family protein.		0.523941	0.46346	0.538507
Os12g0104800		Similar to Clathrin heavy chain.		0.522183	0.746683	0.522498
Os01g0866300		VAMP-like protein YKT61 (AtYKT61) (Geranylgeranylated protein 1) (AtGP1).		0.521241	0.620863	0.518391
Os05g0419600		Conserved hypothetical protein.		0.517939	0.587873	0.703839
Os10g0545700		Similar to Rhodanese-like protein.	OsACR2.1, OsStr20	0.517062	0.48593	0.565638
Os01g0139200		Octicosapeptide/Phox/Bem1p domain containing protein.		0.516607	0.699682	0.53122
Os02g0107000		Sec63 domain domain containing protein.		0.516594	0.434205	0.574267
Os08g0520500		Similar to Isoform 2 of Auxin response factor 21.	OsARF7b	0.514647	0.572776	0.573564
Os02g0674700		Similar to protein binding protein.		0.512253	0.532345	0.51377
Os06g0318600		Peptidase S41 domain containing protein.	OsCttP3	0.510622	0.701881	0.453741
Os06g0667500		Similar to 14 kDa zinc-binding protein (Protein kinase C inhibitor) (PKCI).		0.51013	0.508149	0.566019
Os06g0199500		Halotolerance protein, Flavin mononucleotide (FMN)-binding protein, Regulation of cell division, Light-regulated growth	OsHAL3	0.508829	0.482587	0.631242
Os10g0213800		Hypothetical conserved gene.		0.508006	0.536971	0.524416
Os07g0173200		Hypothetical conserved gene.		0.507966	0.478495	0.496753
Os03g0175600		Similar to Nit protein 2 (CUA002).		0.507164	0.474761	0.497693
Os08g0249400		Hypothetical conserved gene.		0.505458	0.522293	0.520918
Os01g0182200		Similar to cDNA clone:001-208-D07, full insert sequence.	OsSIP1;1	0.5039	0.554327	0.510636
Os02g0768600		Similar to Chloroplast inorganic pyrophosphatase (EC 3.6.1.1).		0.502087	0.336978	0.582879
Os01g0558900		Conserved hypothetical protein.		0.501543	0.433793	0.612343
Os07g0568600		Similar to Calcium-dependent protein kinase.	OsCDPK20	0.500632	0.613222	0.511077
Os05g0409300		Similar to Cysteine protease inhibitor.		0.500338	0.712211	0.466972
Os02g0184500		Similar to CUE domain containing protein.		0.500245	0.317096	0.583785
Os12g0465700		Plant-specific protein containing a glutamine-rich region and a conserved motif, Controls of phyllotaxy by affecting cytokinin signaling	DEC	0.499995	0.471132	0.555016
Os08g0562800		Similar to Transparent testa 12 protein.		0.499034	0.918381	0.450901
Os09g0493500		Similar to H0404F02.2 protein.	OsTKPR1, OsDFR2	0.49859	0.588237	0.669608
Os04g0665500		Similar to H1005F08.9 protein.		0.498435	0.335757	0.629799
Os06g0731500		Conserved hypothetical protein.	JMJ708	0.49757	0.531547	0.523431
Os02g0319300		Glutathione S-transferase, C-terminal-like domain containing protein.		0.496244	0.536577	0.60658
Os07g0621300		Similar to FIP1.		0.496196	0.480194	0.454559
Os02g0673600		ORMDL family protein.		0.495782	0.45472	0.45663
Os07g0196900		Conserved hypothetical protein.	OsFbox349	0.495441	0.395686	0.548452
Os03g0439800		Protein of unknown function DUF1909 domain containing protein.		0.494591	0.578659	0.640409
Os06g0708000		Mitogen-activated protein kinase	OsBWMK1, OsMAPK1	0.49403	0.507469	0.719365
Os08g0558200		Thioredoxin fold domain containing protein.	OsGRX20	0.493273	0.375801	0.441878
Os08g0292900		Similar to Isoform 2 of Homeobox protein knotted-1-like 13.	OsH42	0.491708	0.532724	0.527117
Os01g0229200		VHS domain containing protein.		0.49158	0.348366	0.56186
Os03g0775500		Protein of unknown function DUF59 domain containing protein.		0.490383	0.597565	0.483615
Os01g0733600		Flavoprotein pyridine nucleotide cytochrome reductase domain containing protein.		0.489692	0.649413	0.562398
Os02g0134500		Similar to UPF0497 membrane protein Sb04g002820.		0.489667	0.620373	0.526525
Os04g0669800		Methylthioribose kinase (EC 2.7.1.100).	OsMTK	0.488971	0.504572	0.824682
Os06g0239000		Similar to Glucose-inhibited division protein B-like protein.		0.488758	0.463586	0.489554
Os04g0311100		Similar to OSIGBa0148D14.7 protein.		0.487846	0.49643	0.451914
Os03g0744650		Similar to predicted protein.		0.487522	0.421305	0.630339
Os04g0472600		Non-protein coding transcript.	OsFbox218	0.486971	0.571148	0.532894
Os03g0786800		Similar to Cullin-4A (CUL-4A).		0.485645	0.558872	0.610593
Os06g0644100		Carbohydrate-binding-like fold domain containing protein.		0.485454	0.53332	0.493022
Os02g0122000		Similar to P18.		0.484857	0.708783	0.440721
Os07g0164600		SOH1 family protein.	OsMED31a	0.484453	0.556603	0.506423
Os09g0390400		Similar to OsRAD23-like.		0.483888	0.528885	0.543457
Os06g0713900		Hypothetical conserved gene.		0.48361	0.477286	0.539076
Os01g0867900		Protein of unknown function DUF502 family protein.		0.48346	0.39285	0.733692
Os05g0230700		Similar to Auxin-responsive protein IAA17.		0.483372	0.924274	0.429827
Os04g0692200		Chloroplast nucleoid-associated protein, Chloroplast development, Regulator of plastid-encoded plastid RNA polymerase (PEP) activity		0.481249	0.410127	0.486224
Os05g0564800		Similar to 60S ribosomal protein L18A.		0.48112	0.538447	0.438106
Os01g0919500		Zinc finger, RING/FYVE/PHD-type domain containing protein.		0.479302	0.512079	0.575207
Os03g0283300		Conserved hypothetical protein.		0.476966	0.5339	0.462713
Os03g0687200		Conserved hypothetical protein.		0.47334	0.368622	0.445514
Os10g0564900		Similar to Protein kinase CK2 regulatory subunit CK2B2.		0.473181	0.372053	0.729431
Os02g0742500		Similar to DEGP9 (DEGP PROTEASE 9); serine-type peptidase/ trypsin.	OsDegp3, OsDeg9.1	0.473154	0.47383	0.521979
Os07g0642300		TRAPP I complex, Bet3 domain containing protein.		0.471616	0.521112	0.542055
Os09g0296800		Chlorophyll A-B binding protein family protein.	CabE	0.470071	0.518694	0.409051
Os12g0489200		Ubiquitin-specific protease 12.		0.470022	0.520189	0.524116
Os01g0175000		Similar to Biostress-resistance-related protein (Fragment).		0.469273	0.491409	0.477768
Os08g0206800		Similar to cDNA clone:001-034-C01, full insert sequence.		0.468626	0.741109	0.452812
Os02g0327100		Similar to ARL2 G-protein.		0.466864	0.512825	0.516377
Os01g0338600		Similar to cysteine sulfinate desulfinase/cysteine desulfurase and related enzymes.		0.465314	0.349695	0.441595
Os09g0467400		Similar to ATPUP3.	OsPUP3	0.465244	0.672977	0.46592
Os01g0869600		TRAM, LAG1 and CLN8 homology domain containing protein.		0.463943	0.543598	0.672588
Os01g0921400		Conserved hypothetical protein.	OsExo70F1	0.461368	0.532728	0.635523
Os01g0813400		Similar to ADP-ribosylation factor 1.	OsARFA1a	0.459478	0.534353	0.534093
Os01g0188400		NADP-dependent malic enzyme, chloroplast precursor (EC 1.1.1.40) (NADP-ME).	NADP-ME, ME6	0.458829	0.333823	0.664509
Os04g0347600		Tetratricopeptide-like helical domain containing protein.		0.458782	0.467763	0.566155
Os03g0428800		Tetratricopeptide-like helical domain containing protein.		0.458148	0.424657	0.387709
Os02g0550600		Plant neutral invertase family protein.	OsNIN8	0.45765	0.61357	0.631293
Os08g0112600		Conserved hypothetical protein.		0.455988	0.575494	0.499644
Os03g0153000		Similar to cDNA clone:001-019-C07, full insert sequence.		0.454523	0.608457	0.496056
Os01g0189800		Protein of unknown function DUF1618 domain containing protein.		0.451813	0.398799	0.557356
Os03g0795500		Thioredoxin, core domain containing protein.		0.451702	0.535104	0.588444
Os09g0394900		Similar to Annexin-like protein.	OsANN9	0.450798	0.512948	0.58609
Os02g0448600		Conserved hypothetical protein.		0.45054	0.5437	0.723224
Os01g0296100		Similar to Shaggy-related protein kinase alpha (EC 2.7.1.-) (ASK-alpha).		0.449539	0.338805	0.546102
Os07g0179400		Dephospho-CoA kinase domain containing protein.		0.445379	0.409826	0.555214
Os05g0275700		Similar to Peroxisome assembly protein 2 (Peroxin-2) (AthPEX2) (Pex2p).	OsRFPHC-15	0.445279	0.549988	0.510345
Os01g0689800		Alpha/beta hydrolase fold-1 domain containing protein.		0.444839	0.523149	0.518311
Os02g0701600		Similar to Tocopherol O-methyltransferase, chloroplast precursor (EC 2.1.1.95) (Gamma-tocopherol methyltransferase).	OsVTE4	0.444037	0.369963	0.413925
Os03g0333700		Conserved hypothetical protein.		0.443687	0.520339	0.441861
Os03g0641700		Similar to predicted protein.	OsMED19b	0.443164	0.439905	0.678198
Os02g0217600		Similar to Isoform 2 of Serine/threonine-protein phosphatase PP2A-3 catalytic subunit.	OsPP2A-3	0.442155	0.561025	0.492145
Os10g0393100		Peptidase A22B, signal peptide peptidase domain containing protein.		0.442075	0.546885	0.470088
Os06g0136800		Peptidase S14, ClpP family protein.	OsClp9	0.439926	0.351595	0.49709
Os12g0183100		Similar to Branched chain alpha-keto acid dehydrogenase E1-alpha subunit (Fragment).	0	0.4367	0.395915	0.500492
Os03g0820700		Zinc finger, CCHC-type domain containing protein.		0.435673	0.558415	0.657976
Os12g0405200		Similar to Conserved NnrU/NnuR ortholog membrane enzyme.		0.434967	0.341211	0.452006
Os02g0708300		Zinc finger, RING/FYVE/PHD-type domain containing protein.		0.434104	0.461694	0.412331
Os01g0321800		Gas vesicle protein GvpC repeat containing protein.		0.433963	0.568001	0.651445
Os02g0272600		Aph-1 family protein.		0.432378	0.447746	0.536124
Os01g0662600		Similar to NifU-like protein.	OsISC6	0.431472	0.348414	0.38905
Os04g0635800		Acyl-CoA N-acyltransferase domain containing protein.		0.425086	0.622948	0.462488
Os06g0503400		Reticulon family protein.		0.423271	0.370884	0.502184
Os06g0547900		Similar to Shaggy-related protein kinase eta (EC 2.7.1.-) (ASK-eta) (BRASSINOSTEROID-INSENSITIVE 2) (ULTRACURVATA1).	OsGSK4, OsSKETHA	0.421107	0.472787	0.534259
Os06g0213200		Similar to Tic22.		0.419982	0.74243	0.510549
Os06g0174400		Similar to Vesicle-associated membrane protein 712 (AtVAMP712).		0.419132	0.519849	0.420387
Os02g0564100		Similar to EL3 protein.		0.418127	0.497897	0.428275
Os01g0866100		Similar to Actin 4.	RAc7	0.416927	0.662658	0.481451
Os05g0295800		Similar to Glyoxalase I (EC 4.4.1.5).		0.416461	0.525194	0.420546
Os05g0568900		Similar to Protease Do-like 1, chloroplast precursor (EC 3.4.21.-).	OsDegp9	0.412798	0.351131	0.391013
Os01g0507500		Transcription elognation factor Eaf, N-terminal domain containing protein.		0.412523	0.37366	0.42378
Os02g0760500		Similar to ER6 protein (Fragment).		0.412509	0.730579	0.612613
Os07g0669900		Non-protein coding transcript.		0.411919	0.453139	0.470964
Os06g0699400		MAP kinase 2.	OsMAPK4	0.411733	0.348538	0.589305
Os07g0177300		Uncharacterised protein family UPF0005 domain containing protein.		0.406231	0.49444	0.418975
Os04g0556300		Glutathione peroxidase.	OsGPX1	0.404583	0.62992	0.40492
Os01g0254900		Similar to Syntaxin 22 (AtSYP22) (AtVAM3).		0.388629	0.324052	0.507054
Os05g0305100		Similar to Transcription factor IIIB 90 kDa subunit (TFIIIB90) (hTFIIIB90) (B- related factor 1) (BRF-1) (hBRF) (TATA box-binding protein-associated factor, RNA polymerase III, subunit 2) (TAF3B2). Splice isoform 2.		0.387204	0.521368	0.430482
Os05g0138300		Similar to ICT protein (Fragment).	OsLTI6B	0.380817	0.445334	0.498123
Os06g0106100		Cwf15/Cwc15 cell cycle control protein family protein.		0.380073	0.393962	0.412125
Os01g0198200		Similar to Casein kinase-like protein.		0.377734	0.448483	0.475555
Os04g0464500		SEP domain containing protein.		0.374908	0.391131	0.460558
Os01g0105900		Carbohydrate/purine kinase domain containing protein.		0.365238	0.405865	0.388885
Os07g0161600		Calcium-dependent protein kinase, Cold stress response	OsCDPK17	0.362926	0.536215	0.419334
Os03g0208500		Integral membrane protein.	OsNRAMP2	0.362272	0.350636	0.582101
Os12g0507200		Similar to Eukaryotic translation initiation factor 5A-2 (eIF-5A-2) (eIF-4D).	EIF4D	0.355459	0.456176	0.367414
Os02g0610600		Similar to 9G8-like SR protein (RSZp22 splicing factor).		0.348844	0.391417	0.353975
Os03g0109600		Similar to Transcription factor homolog BTF3-like protein.	BTF3a	0.337036	0.429464	0.357007
Os02g0581300		TRAM, LAG1 and CLN8 homology domain containing protein.		0.334508	0.409117	0.412393
Os01g0691700		Similar to Serine/threonine protein phosphatase 2A.	OsPP13	0.3302	0.365117	0.386532
Os12g0581700		Conserved hypothetical protein.		0.329564	0.312925	0.348289
Os03g0344900		Similar to ATP-dependent Clp protease proteolytic subunit.	OsClp5	0.328442	0.431826	0.481114
Os01g0589500		Uncharacterised conserved protein UCP009193 domain containing protein.		0.326256	0.376572	0.446504
Os07g0467600		Similar to Plus agglutinin.		0.325179	0.336866	0.486851
Os02g0123600		Similar to CDP-diacylglycerol--inositol 3-phosphatidyltransferase 1 (EC 2.7.8.11) (Phosphatidylinositol synthase 1) (PtdIns synthase 1) (PI synthase 1) (AtPIS1).	0	0.319709	0.381048	0.509501

## Sheet: Leaf-down
Gene ID	Class	Annotation	Gene name	P. phytofirmans	P. kururiensis	B. vietnamiensis
Os10g0140700	Unknown	Hypothetical conserved gene.		-2.28657	-2.27373	-1.98782
Os04g0205101	Unknown	Hypothetical protein.		-2.24344	-1.42749	-2.6498
Os02g0258800	Unknown	Conserved hypothetical protein.		-1.99357	-1.34743	-2.11838
Os01g0916950	Unknown	Hypothetical gene.		-1.70458	-1.72751	-1.10133
Os01g0740700	Unknown	Hypothetical protein.		-1.69162	-1.58532	-1.66748
Os02g0209050	Unknown	Hypothetical gene.		-1.68139	-1.91524	-1.75335
Os07g0131001	Unknown	Hypothetical protein.		-1.61787	-1.21701	-1.5054
Os06g0673700	Unknown	Hypothetical protein.		-1.55901	-1.33358	-1.66953
Os07g0173300	Unknown	Conserved hypothetical protein.		-1.54097	-1.84807	-1.73392
Os04g0563050	Unknown	Hypothetical protein.		-1.45287	-1.15044	-2.11727
Os03g0168300	Unknown	Protein of unknown function DUF1997 domain containing protein.		-1.44702	-1.2271	-2.25107
Os03g0803800	Unknown	Conserved hypothetical protein.		-1.43307	-2.07219	-1.4565
Os03g0758551	Unknown	Hypothetical conserved gene.		-1.42008	-1.74255	-1.30564
Os01g0142600	Unknown	Conserved hypothetical protein.		-1.36706	-1.08256	-1.6447
Os09g0565450	Unknown	Hypothetical conserved gene.		-1.3635	-1.55962	-1.06735
Os12g0568750	Unknown	Hypothetical protein.		-1.32591	-1.71812	-1.1472
Os11g0690466		Hypothetical protein.		-1.75631	-0.756093	-1.69785
Os01g0552050	Unknown	Hypothetical protein.		-1.32046	-1.6757	-1.21416
Os04g0622501	Unknown	Hypothetical gene.		-1.3034	-1.6749	-1.55398
Os06g0647900	Unknown	Conserved hypothetical protein.		-1.30213	-1.63842	-1.46282
Os05g0302916	Unknown	Hypothetical protein.		-1.29647	-1.35401	-1.11025
Os03g0293000		Similar to DnaJ domain containing protein, expressed.	OsERdj3A, TMS1	-1.66932	-0.801343	-2.03697
Os08g0140300		Aromatic L-amino acid decarboxylase (AADC), Senescence-induced serotonin biosynthesis	OsTDC	-1.66477	-0.942989	-1.65143
Os02g0101750	Unknown	Hypothetical gene.		-1.28788	-1.64725	-1.08902
Os02g0162766	Unknown	Hypothetical conserved gene.		-1.27502	-1.89088	-1.35055
Os09g0358500	Unknown	Hypothetical conserved gene.		-1.26357	-1.26246	-1.22957
Os12g0105962	Unknown	Hypothetical protein.		-1.22116	-1.8381	-1.14804
Os06g0200250	Unknown	Hypothetical conserved gene.		-1.21856	-1.01332	-1.19651
Os03g0711250	Unknown	Hypothetical gene.		-1.21557	-1.57293	-1.17203
Os04g0588500	Unknown	Hypothetical gene.		-1.21135	-1.16816	-1.21392
Os02g0553802	Unknown	Hypothetical conserved gene.		-1.20217	-1.90882	-1.32662
Os02g0708500	Unknown	Conserved hypothetical protein.		-1.19899	-1.51927	-1.03811
Os03g0622500	Unknown	Conserved hypothetical protein.		-1.19257	-1.10488	-1.1676
Os06g0647801	Unknown	Hypothetical conserved gene.		-1.17629	-1.3676	-1.04223
Os12g0117500	Unknown	Hypothetical protein.		-1.17023	-2.18721	-1.51644
Os07g0482566	Unknown	Hypothetical gene.		-1.16719	-1.42129	-1.31151
Os11g0229600	Unknown	Hypothetical gene.		-1.15651	-1.15267	-1.05513
Os06g0113950	Unknown	Hypothetical conserved gene.		-1.10359	-1.23233	-1.01376
Os05g0402851	Unknown	Hypothetical protein.		-1.10334	-1.46088	-1.14248
Os04g0149400	Unknown	Conserved hypothetical protein.		-1.09016	-1.0197	-1.23818
Os04g0304250	Unknown	Hypothetical protein.		-1.08947	-1.34836	-1.13309
Os09g0470500		Homeodomain leucine zipper protein.	OsHox4	-1.5103	-1.48757	-0.76554
Os10g0565401	Unknown	Hypothetical conserved gene.		-1.08608	-1.56518	-1.20774
Os10g0135100		NB-ARC domain containing protein.		-1.49074	-0.95768	-1.22976
Os05g0105050	Unknown	Hypothetical conserved gene.		-1.08203	-1.70579	-1.04875
Os04g0432250	Unknown	Conserved hypothetical protein.		-1.03507	-1.25731	-1.07051
Os11g0635000	Unknown	Conserved hypothetical protein.		-1.02558	-1.55648	-1.38479
Os01g0585600	Unknown	Protein of unknown function DUF632 domain containing protein.		-1.00181	-1.12582	-1.08825
Os01g0305900		Similar to R2R3 Myb transcription factor MYB-IF35.		-1.44516	-0.916208	-1.15781
Os12g0507700	Other	Similar to predicted protein.	LEA family, Glutamate racemase	-2.44968	-1.80175	-1.88021
Os05g0582000	Other	Plant Basic Secretory Protein domain containing protein.		-2.2621	-1.02652	-2.57563
Os07g0634400	Other	HAD-superfamily hydrolase, subfamily IA, variant 3 domain containing protein.		-2.0648	-1.64938	-1.66443
Os04g0150300	Other	Conserved hypothetical protein.		-1.81389	-1.38191	-2.11892
Os10g0521500	Other	Esterase/lipase/thioesterase domain containing protein.		-1.67847	-1.46443	-1.74671
Os06g0673800	Other	Conserved hypothetical protein.		-1.62479	-1.5611	-1.55082
Os11g0489250	Other	Similar to Cytochrome P450 family protein, expressed.		-1.59657	-1.78885	-2.50416
Os08g0500700		Similar to Heat shock protein 82.	OsHSP82A	-1.42805	-0.820372	-1.93142
Os09g0412700	Other	Conserved hypothetical protein.		-1.58639	-1.66864	-1.83925
Os10g0422075	Other	Similar to Viral A-type inclusion protein repeat containing protein, expressed.		-1.53089	-1.70283	-1.37983
Os02g0152750	Other	Non-protein coding transcript.		-1.51235	-1.99106	-1.46965
Os03g0617101	Other	Non-protein coding transcript.		-1.44349	-1.83148	-1.97599
Os07g0564750	Other	Putative guanine nucleotide-exchange protein GEP2		-1.44156	-1.62647	-1.29304
Os08g0158200	Other	FAD linked oxidase, N-terminal domain containing protein.		-1.43912	-1.40329	-1.89176
Os12g0416900	Other	Conserved hypothetical protein.		-1.39856	-1.70136	-1.44256
Os01g0943800	Other	Similar to cDNA, clone: J100054L12, full insert sequence.		-1.35641	-1.48489	-1.03852
Os10g0559050	Other	Non-protein coding transcript.		-1.34781	-1.28046	-1.32588
Os10g0112850	Other	Non-protein coding transcript.		-1.31291	-1.47024	-1.29016
Os08g0173600		Conserved hypothetical protein.		-1.36073	-0.757024	-1.86495
Os07g0421866	Other	Similar to tetratricopeptide repeat (TPR)-containing protein.		-1.30261	-1.81863	-1.26032
Os01g0942900	Other	Similar to cDNA clone:J023028M23, full insert sequence.		-1.28758	-1.52688	-1.03679
Os02g0697600		ATPase, AAA-type, core domain containing protein.		-1.3473	-0.888846	-1.21724
Os04g0555600	Other	Similar to WD-40 repeat family protein / beige-related.	DUF4704	-1.25337	-1.72386	-1.16664
Os03g0347400	Other	Non-protein coding transcript.		-1.21305	-2.08828	-1.11197
Os10g0206650		Non-protein coding transcript.		-1.32418	-1.17324	-0.979868
Os10g0559700	Other	Similar to Agenet domain containing protein, expressed.		-1.20677	-1.61607	-1.05475
Os02g0303500	Other	Eggshell protein family protein.		-1.187	-1.18388	-1.48183
Os02g0154000		Protein kinase, core domain containing protein.	LRK2	-1.31815	-0.855	-1.45079
Os05g0310600	Other	NC domain containing protein.		-1.16339	-1.23155	-1.25536
Os03g0107400	Other	Prefoldin domain containing protein.		-1.15281	-1.11523	-1.1544
Os06g0291800	Other	Conserved hypothetical protein.		-1.1449	-1.02218	-1.15301
Os02g0830801	Other	Similar to binding.		-1.14246	-1.77064	-1.12076
Os09g0407950	Other	Similar to transducin family protein / WD-40 repeat family protein.		-1.1311	-1.37349	-1.00398
Os02g0645100	Other	Kinesin, motor region domain containing protein.	KIN7C	-1.12902	-1.12342	-1.25643
Os05g0463500	Other	PWWP domain containing protein.		-1.12617	-1.59755	-1.09738
Os02g0768750	Other	Hypothetical conserved gene.		-1.1133	-1.6098	-1.17694
Os02g0247000	Other	Protein of unknown function DUF605 domain containing protein.	Vta1	-1.10748	-1.44782	-1.25059
Os05g0537200	Other	Similar to Myosin XI (Fragment).	OsSTA158	-1.08746	-1.16942	-1.02103
Os02g0202300		Protein of unknown function DUF3414 domain containing protein.		-1.29405	-1.5661	-0.99849
Os02g0123300	Translation	Eukaryotic translation initiation factor 3 subunit 8, N-terminal domain containing protein.		-1.5247	-1.22837	-1.20398
Os07g0203275	Translation	Ribosomal protein S1, RNA-binding domain domain containing protein.		-1.46789	-1.18333	-1.39492
Os02g0664100	Translation	Hypothetical conserved gene.		-1.25296	-1.57121	-1.3347
Os01g0668200	RNA metabolism	Conserved hypothetical protein.		-1.61385	-1.92805	-1.71031
Os10g0572000		GTP-binding protein, HSR1-related domain containing protein.		-1.28257	-1.41531	-0.953347
Os07g0281800		Similar to Aldehyde oxidase-2.		-1.27853	-0.839341	-1.57477
Os02g0244600	RNA metabolism	Nucleotide-binding, alpha-beta plait domain containing protein.		-1.28356	-1.3577	-1.72013
Os06g0574450	RNA metabolism	Hypothetical conserved gene.		-1.20662	-1.52962	-1.09072
Os04g0625350	RNA metabolism	Similar to OSIGBa0148A10.3 protein.	5,8S rRNA	-1.7584	-1.9329	-1.98201
Os05g0446600	RNA metabolism	Similar to DNA glycosylase/lyase 701.	REPRESSOR OF SILENCING 1d	-1.4978	-1.56367	-1.30887
Os10g0572500	RNA metabolism	Zinc finger, RING/FYVE/PHD-type domain containing protein.	OsDLN242	-1.27065	-1.6083	-1.15181
Os02g0152800	RNA metabolism	RNA polymerase Rpb1, domain 1 containing protein.	RNA_pol_Rpb1_1	-1.26673	-1.8803	-1.21401
Os07g0648266	RNA metabolism	Similar to 2-oxo acid dehydrogenase, lipoyl-binding site.	OsMed12_1	-1.21887	-1.56144	-1.12724
Os10g0511800	RNA metabolism	Similar to Plus-3 domain containing protein, expressed.	SWIB/MDM2	-1.18251	-1.80265	-1.11382
Os05g0100500	RNA metabolism	Similar to Debaryomyces hansenii chromosome F of strain CBS767 of Debaryomyces hansenii.	Sin3-like	-1.16177	-1.4173	-1.0641
Os03g0112600	RNA metabolism	Similar to Plus-3 domain containing protein, expressed.	SWIB/MDM2	-1.12527	-1.51708	-1.07562
Os06g0545900		Protein of unknown function DUF246, plant family protein.		-1.25855	-0.753962	-1.49203
Os09g0530500	RNA metabolism	Hypothetical conserved gene.	Zinc finger PHD-type, SWIB/MDM2 domain	-1.08359	-1.55352	-1.00276
Os01g0182832	DNA conformation	Hypothetical conserved gene.		-1.26833	-1.68806	-1.20091
Os08g0206700	DNA conformation	DNA-binding, integrase-type domain containing protein.	MBD13-like	-1.2573	-1.44374	-1.10939
Os07g0661550	DNA conformation	Similar to PHD finger family protein.	Znf_PHD	-1.25529	-1.53216	-1.16559
Os02g0741500		Ribbon-helix-helix domain containing protein.		-1.24154	-1.58917	-0.929657
Os06g0102800	DNA conformation	SNF2-related domain containing protein.	OsCHR723	-1.16542	-1.33216	-1.19696
Os06g0581500		Protein kinase, core domain containing protein.		-1.23619	-0.896282	-1.4559
Os10g0532100	DNA conformation	Similar to Amine oxidase, flavin-containing.	OsHDMA704, OsPAO11	-1.10588	-1.60642	-1.12923
Os07g0646100		Similar to predicted protein.	OsPP2C65, OsPP98	-1.23182	-0.856457	-1.58558
Os05g0593550		Hypothetical conserved gene.		-1.22617	-1.84304	-0.96328
Os03g0352450	DNA conformation	Hypothetical conserved gene.	OsINO80	-1.08574	-1.59573	-1.05677
Os07g0165200	DNA conformation	Ankyrin domain containing protein.	OsSTA189	-1.07458	-1.26582	-1.13873
Os08g0130600	Development	BTB domain containing protein.	NPH3	-1.30792	-1.09952	-1.47877
Os01g0281100	Development	Conserved hypothetical protein.		-1.29731	-1.01789	-1.35212
Os01g0933500	Development	Similar to FLP1.	OsFPFL2	-1.23463	-1.30039	-1.46714
Os03g0326100		Phospholipid-transporting ATPase 1 (EC 3.6.3.1) (Aminophospholipid flippase 1).		-1.2155	-0.813551	-0.99414
Os08g0162100	Development	Transcriptional co-repressor, Regulation of meristem fate	OsLIS-L1, OsWD40-155, OsREL2	-1.06209	-1.18546	-1.24292
Os01g0672201	Development	Homeobox domain containing protein.		-1.01435	-1.50209	-1.26061
Os05g0186100		Similar to Histidine-containing phosphotransfer protein 4.		-1.20994	-0.712733	-0.668374
Os06g0228500		Amino acid transporter, transmembrane domain containing protein.	OsATL12	-1.20855	-0.864456	-0.996316
Os02g0603800	Secondary metabolism	Similar to Isoprenoid biosynthesis-like protein (Fragment).	OsHDS	-1.37199	-1.90393	-1.43793
Os04g0171800	Secondary metabolism	Similar to Cytochrome P450 79A1 (EC 1.14.13.41) (Tyrosine N-monooxygenase) (Cytochrome P450Tyr).		-1.30998	-1.72252	-2.1633
Os02g0611200	Secondary metabolism	S-adenosylmethionine decarboxylase, Polyamine biosynthesis, Abiotic stress	OsSAMDC2	-1.10373	-1.65791	-1.17532
Os06g0120200		Protein of unknown function DUF594 family protein.		-1.20178	-0.661193	-1.41772
Os12g0239000		Conserved hypothetical protein.		-1.20001	-0.664345	-1.35425
Os05g0582300	Secondary metabolism	Similar to prenyl transferase.	OsSPS2	-1.0878	-1.56436	-1.08992
Os06g0210000	Transport	Protein of unknown function DUF6 domain containing protein.	WAT1-related	-1.5275	-1.76624	-1.51556
Os01g0886900		Similar to EMB1879 (EMBRYO DEFECTIVE 1879).	OsRUS6A	-1.18968	-0.94699	-0.99995
Os01g0719600	Transport	Heavy metal transport/detoxification protein domain containing protein.		-1.27754	-1.02429	-1.0966
Os03g0685700		Conserved hypothetical protein.		-1.18492	-1.53348	-0.997658
Os04g0611600	Transport	Hypothetical protein.	Similar to AtVSR7	-1.26854	-1.45898	-1.15493
Os01g0976100	Transport	ABC transporter-like domain containing protein.	OsABCB8, OsPGP8, OsMDR10	-1.26706	-1.23506	-1.19697
Os02g0227700		Serine/threonine protein kinase-related domain containing protein.		-1.18102	-0.77354	-1.0938
Os02g0575700		Similar to OSIGBa0097P08.1 protein.		-1.17994	-1.22382	-0.829385
Os02g0550800	Transport	Ammonium transporter family protein.	OsAMT3.3	-1.25963	-1.04313	-1.38162
Os03g0254200	Transport	Similar to predicted protein.		-1.14936	-1.06059	-1.17859
Os06g0184700		Hypothetical conserved gene.	OsABCC12, OsMRP12	-1.17524	-1.47149	-0.99578
Os06g0699600		CCT domain containing protein.	OsCCT25, OsCMF7	-1.17152	-0.865005	-1.3852
Os08g0116700	Transport	Conserved hypothetical protein.	VPS13	-1.14335	-1.68359	-1.06408
Os07g0121750		Conserved hypothetical protein.		-1.16897	-1.28481	-0.963554
Os03g0112101	Transport	Similar to Adaptin N terminal region family protein, expressed.		-1.09059	-1.31096	-1.23889
Os01g0777000	Transport	Vacuolar protein sorting-associated protein 51 domain containing protein.	COG1	-1.07136	-1.26614	-1.10847
Os12g0106000	Iron metabolism	Ferritin, Iron storage protein, Iron homeostasis	OsFER2	-1.55723	-1.10939	-1.56478
Os10g0124400	Defense	Hypothetical conserved gene.	NB-ARC	-1.57314	-1.53537	-1.66579
Os02g0118875	Defense	NB-ARC domain containing protein.		-1.43544	-1.89296	-1.80369
Os06g0707700	Defense	NB-ARC domain containing protein.		-1.38341	-1.43836	-1.15144
Os03g0179000		Similar to Tubulin-tyrosine ligase family protein, expressed.		-1.15344	-0.833804	-1.07105
Os12g0169950		Hypothetical gene.		-1.15284	-1.65642	-0.927338
Os11g0598300	Defense	NB-ARC domain containing protein.		-1.32861	-1.10845	-1.06198
Os09g0479500	Defense	NB-ARC domain containing protein.		-1.17852	-1.00509	-1.30299
Os11g0227200	Defense	Similar to NBS-LRR disease resistance protein homologue.		-1.13777	-1.56528	-1.08917
Os12g0123800	Defense	No apical meristem (NAM) protein domain containing protein.	OsDLN250	-1.10063	-1.13267	-1.25738
Os01g0846700		Hypothetical protein.		-1.14393	-0.762418	-1.91781
Os08g0202400	Defense	Disease resistance protein domain containing protein.		-1.04191	-1.42767	-1.37982
Os10g0134500	Defense	NB-ARC domain containing protein.		-1.03662	-1.03927	-1.01157
Os12g0606100		Hypothetical conserved gene.		-1.13992	-0.778609	-0.964139
Os04g0448950	Hormone	Similar to H0818E04.7 protein.		-1.62005	-1.58517	-1.74042
Os11g0226201		Similar to Protein kinase domain containing protein, expressed.		-1.13455	-1.46676	-0.92484
Os01g0952500	Hormone	A-type response regulator, Cytokinin signaling	OsRR4	-1.30151	-1.21066	-1.77441
Os07g0671500	Hormone	Similar to Indole-3-acetic acid-amido synthetase GH3.17 (EC 6.3.2.-) (Auxin- responsive GH3-like protein 17) (AtGH3-17).	OsGH3-11	-1.26465	-1.05151	-1.41045
Os01g0221600		Aluminum-activated malate transporter, Malate-permeable anion channel, Facilitation of malate efflux from cells		-1.12754	-1.00245	-0.970112
Os02g0832400		Similar to Callose synthase 1 catalytic subunit.		-1.12694	-1.68114	-0.995768
Os01g0364100		Similar to OSIGBa0145M07.8 protein.		-1.12693	-1.30201	-0.72444
Os02g0182100	Hormone	B-type response regulator, Cytokinin signaling	OsDLC1, OsRR24	-1.10073	-1.80302	-1.10947
Os09g0482600	Stress	Similar to Heat shock protein 81-3.		-1.62391	-1.6565	-1.82315
Os05g0365700		Glycoside hydrolase, family 1 protein.	Os5Bglu20	-1.11955	-0.805896	-1.14695
Os01g0764000		Similar to Glutathione S-transferase I (EC 2.5.1.18) (GST-I) (GST-29) (GST class- phi).	OsGSTF2	-1.11839	-0.963679	-1.21847
Os05g0557400		Membrane attack complex component/perforin/complement C9 family protein.		-1.11501	-0.803318	-0.962858
Os12g0514500		Similar to Heat-shock protein precursor.		-1.11449	-0.789262	-1.4491
Os05g0217700	Stress	BURP domain containing protein.	OsBURP7	-1.55251	-1.0202	-2.20458
Os05g0447580		Hypothetical conserved gene.		-1.11173	-1.41414	-0.819085
Os11g0619000		Hypothetical protein.		-1.11132	-1.06917	-0.84801
Os06g0499301		Pentatricopeptide repeat domain containing protein.		-1.10997	-0.914975	-1.36819
Os01g0775500		Mannose-binding lectin domain containing protein.		-1.10931	-1.37687	-0.959172
Os03g0195400		Hypothetical gene.		-1.10776	-1.08825	-0.969799
Os07g0628500	Stress	Basic helix-loop-helix dimerisation region bHLH domain containing protein.	OsbHLH1	-1.46785	-1.14707	-1.67939
Os07g0203800		Conserved hypothetical protein.		-1.10632	-1.63115	-0.958426
Os06g0526600	Stress	DEAD-box helicase ATP-binding protein, Response to abiotic stress (salt, dehydration, ABA, blue and red light)	OsABP, OsRH31	-1.43112	-1.3667	-1.4186
Os03g0787300	Stress	Similar to DnaJ homolog.	OsDjA5	-1.38	-1.34579	-1.58976
Os08g0191700	Stress	Glyoxalase I, Abiotic stress response	OsGLYI11	-1.30271	-1.6553	-1.05622
Os08g0487800	Stress	Similar to Heat-shock protein precursor.		-1.16429	-1.0025	-1.00391
Os09g0532000		Senescence-inducible chloroplast protein, Activation of the chlorophll-degrading pathway during leaf senescence	OsSGR	-1.10273	-0.598272	-1.48635
Os06g0716700	Stress	Similar to Heat shock protein 90.	OsHsp90	-1.08687	-1.12427	-1.33897
Os04g0473900	Stress	Megaenzyme-like protein, Drought resistance, Regulation of drought-induced cuticular wax deposition	DWA1	-1.01695	-1.05038	-1.32441
Os03g0649000		Conserved hypothetical protein.		-1.09936	-1.58239	-0.984862
Os07g0545500		Similar to VMP4 protein.	OsSTA198, OsFH11	-1.09796	-0.903173	-0.779731
Os04g0218600		Conserved hypothetical protein.		-1.09692	-1.54338	-0.947615
Os08g0161900		Molecular chaperone, heat shock protein, Hsp40, DnaJ domain containing protein.	OsDjB8	-1.09591	-1.36599	-0.92862
Os03g0111400		Heavy metal transport/detoxification protein domain containing protein.		-1.09585	-1.5476	-0.78285
Os05g0502800		NAF1 domain containing protein.		-1.09482	-0.814157	-0.724677
Os12g0209901		Similar to NB-ARC domain containing protein, expressed.		-1.0937	-1.34339	-0.939537
Os03g0859700	Primary metabolism	Similar to RuBisCO subunit binding-protein alpha subunit, chloroplast precursor (60 kDa chaperonin alpha subunit) (CPN-60 alpha) (Fragment).		-1.77476	-1.08467	-1.33527
Os04g0409900	Primary metabolism	Plant neutral invertase family protein.	OsNIN4	-1.2413	-1.19298	-1.20538
Os08g0111200	Primary metabolism	Beta-glucosidase, GBA2 type domain containing protein.		-1.02126	-1.06464	-1.48985
Os01g0795200	Protein degradation	Similar to Subtilase.	OsSub8	-2.10256	-1.14914	-2.26566
Os04g0402500	Protein degradation	Zinc finger, RING-type domain containing protein.	E3ligase_BOI-like	-1.39077	-1.33913	-1.19534
Os11g0137300	Protein degradation	Armadillo-type fold domain containing protein.		-1.36138	-1.71501	-1.49882
Os07g0669800		Zinc finger, CW-type domain containing protein.		-1.08684	-1.55999	-0.933616
Os06g0301300	Protein degradation	Similar to predicted protein.		-1.28773	-1.61647	-1.20534
Os11g0691400	Signaling	Similar to Protein kinase domain containing protein.		-2.9308	-1.51526	-2.82437
Os08g0542700		Ankyrin repeat containing protein.		-1.08387	-1.08737	-0.918867
Os11g0690332	Signaling	Similar to Protein kinase domain containing protein.		-2.59714	-1.88217	-2.26537
Os02g0675800		Cyclin-like F-box domain containing protein.	OsFbox105	-1.0835	-0.906241	-0.874314
Os08g0247600	Signaling	Leucine-rich repeat, N-terminal domain containing protein.		-2.41572	-1.57096	-2.47458
Os07g0627800		Similar to DRG-like OBG family GTpase fused to an RNA binding domain TGS domain, Fun11p.		-1.08133	-0.503646	-1.34516
Os11g0132600		Similar to Arabinoxylan arabinofuranohydrolase isoenzyme AXAH-II.	OsWD40-181	-1.07961	-0.755012	-0.971006
Os02g0810400		Similar to Dual specificity kinase 1.		-1.0795	-1.39935	-0.820725
Os10g0369750		Hypothetical protein.		-1.07519	-1.23896	-0.882467
Os06g0196900		Similar to Chaperonin.		-1.07462	-0.841514	-0.683453
Os01g0117266	Signaling	Conserved hypothetical protein.	OsRLCK17	-2.02194	-1.51672	-1.86132
Os04g0122200	Signaling	Similar to OSIGBa0137A06.2 protein.		-1.81183	-1.15726	-2.34997
Os09g0347550		Hypothetical protein.		-1.0695	-1.36669	-0.934459
Os12g0511400		Similar to NB-ARC domain containing protein.		-1.06935	-1.42687	-0.859694
Os06g0235300		ATPase, F1/V1/A1 complex, alpha/beta subunit, nucleotide-binding domain containing protein.		-1.06778	-1.41578	-0.85749
Os06g0505302		Similar to SWEETIE (SWEETIE); binding.		-1.06753	-1.72517	-0.990361
Os11g0155000		Dcp1-like decapping family protein.		-1.06313	-0.644319	-1.32027
Os08g0230800	Signaling	Hypothetical conserved gene.		-1.76007	-1.42984	-1.47653
Os04g0409200		Similar to H0321H01.10 protein.	OsSBE4, OsBEIIa	-1.06186	-1.4663	-0.96312
Os03g0128200		Similar to predicted protein.		-1.0612	-1.28883	-0.954973
Os02g0277700	Signaling	Leucine-rich repeat domain containing protein.		-1.60674	-1.3616	-1.23127
Os01g0201200	Signaling	Similar to Protein kinase.		-1.54927	-1.20179	-1.55552
Os02g0136966		Hypothetical gene.		-1.05722	-1.3339	-0.919606
Os06g0562700		Conserved hypothetical protein.		-1.0546	-1.33308	-0.922526
Os01g0621900		Similar to OSIGBa0097P08.1 protein.	IIP1	-1.0545	-1.03234	-0.929313
Os07g0155600		Nramp ion-transporter family protein, Ethylene signaling pathway	OsEIN2	-1.04681	-1.53471	-0.900654
Os08g0332800		Similar to F7O18.23 protein (SWP1) (Struwwelpeter 1 protein).		-1.04501	-1.53744	-0.811058
Os02g0491400		Similar to Peptidylprolyl isomerase.	OsFKBP62c, OsFKBP75	-1.0436	-0.735349	-1.36172
Os09g0428300	Signaling	Similar to Glutamate receptor.		-1.42817	-1.30602	-1.63271
Os08g0478700		Similar to Mitochondrial uncoupling protein 4.		-1.03845	-0.538202	-1.26448
Os04g0330200		Mannose-binding lectin domain containing protein.		-1.03803	-1.18585	-0.908514
Os12g0516200		Conserved hypothetical protein.		-1.03671	-0.986168	-0.764873
Os04g0367000	Signaling	Hypothetical conserved gene.		-1.37158	-1.23914	-1.26172
Os12g0222900	Signaling	Leucine-rich repeat, N-terminal domain containing protein.		-1.32141	-1.28101	-1.40083
Os01g0937300		NB-ARC domain containing protein.		-1.0349	-1.44248	-0.904933
Os01g0128700		Conserved hypothetical protein.		-1.03249	-1.20876	-0.843468
Os08g0459100		Leucine-rich repeat, cysteine-containing containing protein.		-1.03235	-1.12607	-0.822271
Os01g0117200		Similar to ARK protein (Fragment).	OsRLCK16	-1.03196	-0.978445	-1.31067
Os04g0488500		Pentatricopeptide repeat domain containing protein.		-1.03182	-0.604736	-0.824838
Os08g0525600		Similar to Peptidylprolyl isomerase; FK506-binding protein.	OsFKBP62a, OsFKBP64	-1.0317	-0.718295	-1.32621
Os12g0489100		Similar to Ubiquitin-specific protease 12.		-1.03101	-1.44688	-0.996139
Os11g0621300		Protein of unknown function DUF1399 family protein.		-1.0305	-0.861633	-1.1182
Os01g0827600		Exo70 exocyst complex subunit family protein.		-1.02757	-0.816667	-0.968233
Os06g0565000		Hypothetical conserved gene.		-1.02687	-0.684016	-1.0156
Os02g0590800	Signaling	Similar to Serine/threonine-protein kinase Nek6.	OsNek6	-1.2203	-1.57271	-1.01934
Os02g0631601		Similar to predicted protein.		-1.02226	-1.38547	-0.947821
Os07g0679700		Transcriptional factor B3 family protein.		-1.02159	-0.721621	-1.30752
Os06g0586150	Signaling	Protein kinase, catalytic domain domain containing protein.		-1.18162	-1.00823	-1.26105
Os06g0700700		Similar to P1B-type heavy metal transporting ATPase.	OsHMA2	-1.01945	-1.10672	-0.98425
Os02g0831000		Hypothetical protein.		-1.01909	-1.46229	-0.932712
Os03g0554950		Hypothetical conserved gene.		-1.01854	-1.44248	-0.747355
Os04g0227000	Signaling	Leucine-rich repeat, N-terminal domain containing protein.		-1.14445	-1.13082	-1.08602
Os01g0220200		Similar to Uncharacterized plant-specific domain TIGR01589 family protein.		-1.01638	-0.921387	-1.18634
Os03g0358975		Hypothetical protein.		-1.01607	-1.47027	-0.879655
Os06g0727400	Signaling	Similar to Protein kinase APK1A, chloroplast precursor (EC 2.7.1.-).	OsRLCK220	-1.06058	-1.39782	-1.4283
Os02g0704000		Carotenoid oxygenase family protein.		-1.01307	-0.914726	-1.10528
Os01g0650800		Transposon, En/Spm-like domain containing protein.		-1.01273	-1.35797	-0.986525
Os04g0538166		Similar to Elongation factor G, chloroplastic.		-1.01205	-1.42405	-0.733429
Os11g0134500		WD40 repeat-like domain containing protein.	OsWD40-182	-1.00772	-0.675154	-0.976982
Os05g0583075		Hypothetical protein.		-1.00341	-1.32829	-0.808316
Os04g0629300		Similar to H0303G06.18 protein.		-1.00275	-0.700394	-1.00148
Os02g0135700		DNA polymerase V family protein.		-1.00224	-0.831273	-0.774462
Os05g0358500	Signaling	Protein phosphatase 2C domain containing protein.	OsPP2C48, OsPP75	-1.06046	-1.42033	-1.15454
Os04g0446750		Hypothetical gene.		-0.99985	-1.28093	-0.724986
Os11g0160100		Zinc finger, RING/FYVE/PHD-type domain containing protein.		-0.999343	-0.717776	-0.909377
Os04g0568850		Similar to OSIGBa0139P06.4 protein.		-0.997085	-1.19382	-0.976235
Os12g0594200		Hypothetical conserved gene.		-0.994795	-1.5811	-0.906152
Os03g0769400		BTB/POZ fold domain containing protein.		-0.994465	-1.47306	-0.953058
Os05g0317900		Catharanthus roseus receptor-like kinase1-like kinase, Regulation of flowering time signaling pathway and/or circadian rhythms	OsRLCK183, OsCrRLK1L2	-0.993436	-0.686358	-1.02838
Os09g0327200		Pentatricopeptide repeat domain containing protein.		-0.993349	-1.01274	-1.05661
Os11g0224900		Similar to NBS-LRR protein (Fragment).	Os11gRGA3	-0.991288	-0.709328	-1.21722
Os09g0568266		Non-protein coding transcript.		-0.991264	-0.665822	-0.744775
Os03g0686300		Similar to unconventional myosin heavy chain.		-0.990644	-1.42076	-0.83345
Os06g0645901		Similar to Transcription initiation factor TFIID subunit 1.		-0.989578	-1.29556	-0.690615
Os02g0272900		NB-ARC domain containing protein.		-0.989226	-1.09966	-1.1994
Os04g0475200		Similar to OSIGBa0106G07.3 protein.		-0.986272	-0.826426	-0.631229
Os05g0104650		Similar to Formylglycinamide ribonucleotide amidotransferase (Fragment).		-0.986096	-1.09103	-0.963064
Os01g0857400		Amino acid transporter, transmembrane domain containing protein.	OsGAT3	-0.984544	-0.712392	-0.892107
Os05g0275100		Pentatricopeptide repeat domain containing protein.	OsPPR920	-0.982645	-1.05328	-0.958845
Os02g0710102		Hypothetical conserved gene.		-0.982198	-1.50458	-0.856046
Os01g0118066		Non-protein coding transcript.		-0.981489	-1.06307	-0.811833
Os01g0871800		TGF-beta receptor, type I/II extracellular region family protein.		-0.97954	-1.92966	-0.847825
Os04g0527000		GRAM domain containing protein.		-0.977715	-0.954418	-1.2186
Os10g0396666		Hypothetical conserved gene.		-0.977289	-1.37985	-0.883906
Os10g0381800		Conserved hypothetical protein.		-0.977078	-1.01034	-0.959269
Os11g0473200		Similar to Ubiquitin carboxyl-terminal hydrolase 12 (EC 3.1.2.15) (Ubiquitin thiolesterase 12) (Ubiquitin-specific processing protease 12) (Deubiquitinating enzyme 12).		-0.976271	-1.23312	-0.734651
Os09g0563200		Similar to Potassium transporter 11 (AtPOT11).	OsHAK18	-0.976196	-1.20139	-0.772971
Os07g0184800		Similar to Variant of histone H1.		-0.975162	-0.506535	-1.52899
Os01g0552000		Hypothetical conserved gene.		-0.974257	-1.28269	-0.816024
Os02g0700300		Similar to Phosphate starvation response regulator-like protein.		-0.97414	-0.839433	-1.05962
Os09g0474300		Similar to Heat-shock protein precursor.	OsHSP74.8	-0.973995	-0.819155	-0.94671
Os04g0526800		GRAM domain containing protein.		-0.970037	-1.34778	-0.881923
Os09g0471300		Non-protein coding transcript.		-0.969613	-0.940022	-0.964086
Os11g0158832		Similar to Associated with HOX family protein, expressed.		-0.968284	-1.47242	-1.06581
Os05g0497500		Hypothetical conserved gene.	OsC3H36	-0.967676	-0.911282	-0.885406
Os06g0187950		Hypothetical protein.		-0.967086	-1.15506	-0.82027
Os10g0412050		Similar to aminophospholipid ATPase.		-0.966019	-1.31469	-0.798282
Os08g0268550		Conserved hypothetical protein.		-0.965539	-0.934177	-0.943164
Os03g0265001		Hypothetical gene.		-0.962145	-1.35622	-0.719202
Os02g0830300		Conserved hypothetical protein.		-0.961674	-1.04567	-0.866295
Os11g0210300		Alcohol dehydrogenase 1.	Adh1	-0.961097	-0.549985	-0.955826
Os09g0271100		Conserved hypothetical protein.		-0.960542	-0.553441	-0.918751
Os05g0464001		Conserved hypothetical protein.		-0.959873	-1.37272	-0.887611
Os07g0438500		Octicosapeptide/Phox/Bem1p domain containing protein.		-0.959859	-1.17665	-0.76169
Os01g0760600		Aspartate aminotransferase, cytoplasmic (EC 2.6.1.1) (Transaminase A).	0	-0.958932	-1.07307	-0.857497
Os07g0134800		Similar to Succinate dehydrogenase [ubiquinone] flavoprotein subunit, mitochondrial (EC 1.3.5.1) (FP) (Flavoprotein subunit of complex II).	sdh1, FP	-0.958636	-0.966326	-0.900407
Os05g0379500		Conserved hypothetical protein.		-0.958597	-1.03108	-1.45055
Os03g0815200		Similar to Methylenetetrahydrofolate reductase (EC 1.5.1.20).		-0.955514	-0.603928	-0.960406
Os05g0115100		Hypothetical conserved gene.		-0.953444	-0.974021	-1.19673
Os02g0204500		Hypothetical conserved gene.		-0.952744	-1.28844	-0.748701
Os02g0156600		Hypothetical conserved gene.		-0.951356	-0.886066	-0.999849
Os11g0213800		Similar to NBS-LRR disease resistance protein homologue (Fragment).		-0.950503	-1.05246	-0.853273
Os12g0273300		Similar to NB-ARC domain containing protein.		-0.950399	-1.44434	-1.3098
Os10g0442532		Hypothetical gene.		-0.94849	-1.13678	-0.781807
Os06g0728700		Homeodomain-like containing protein.	0	-0.947288	-0.815147	-0.884593
Os01g0840200		HSP20-like chaperone domain containing protein.		-0.946221	-1.06066	-0.785403
Os12g0116900		Hypothetical conserved gene.		-0.946086	-1.10482	-1.13403
Os07g0117000		NB-ARC domain containing protein.		-0.94234	-0.777525	-1.39531
Os08g0206400		Similar to Potassium transporter 18.	OsHAK12	-0.942023	-0.786243	-1.28445
Os06g0690900		Pentatricopeptide repeat domain containing protein.		-0.941441	-0.717592	-0.827831
Os07g0151200		Sugar/inositol transporter domain containing protein.		-0.939634	-1.40936	-1.08288
Os01g0924200		Conserved hypothetical protein.		-0.93926	-0.576548	-0.670578
Os05g0114500		RNA recognition motif domain domain containing protein.		-0.936346	-0.926257	-0.710967
Os07g0475400		Similar to Expansin-like protein A (Fragment).		-0.931766	-0.455113	-1.07385
Os04g0615700		Argonaute and Dicer protein, PAZ domain containing protein.	OsAGO2	-0.930289	-0.806651	-1.00369
Os03g0711525		Hypothetical protein.		-0.930126	-1.60022	-0.949429
Os01g0834700		Zinc finger, CCCH-type domain containing protein.	OsC3H11	-0.929977	-0.424429	-1.18624
Os01g0158400		Galactose-binding like domain containing protein.		-0.929805	-0.848443	-0.485327
Os03g0650700		Translation elongation factor EFG/EF2, C-terminal domain containing protein.		-0.929662	-0.803567	-1.19388
Os05g0581000		Non-protein coding transcript.		-0.929371	-1.72821	-0.925847
Os09g0553200		UDPase, Pollen mother cell (PMC) meiosis, Pollen development	OsUgp1	-0.92819	-1.17266	-0.736522
Os06g0680500		Similar to Glutamate receptor 3.4 precursor (Ligand-gated ion channel 3.4) (AtGLR4). Splice isoform 2.	OsGLR3.5	-0.926659	-0.888694	-1.23184
Os04g0439100		Similar to H0525C06.4 protein.		-0.926005	-0.788987	-1.18227
Os11g0266500		Similar to NB-ARC domain containing protein, expressed.		-0.921902	-1.09472	-1.11927
Os12g0433200		Zinc finger, CCHC-type domain containing protein.		-0.920811	-1.04947	-0.846231
Os06g0341600		Conserved hypothetical protein.		-0.918538	-0.782479	-0.697431
Os01g0805900		Tubulin beta-2 chain (Beta-2 tubulin).	OsTUB4	-0.918403	-0.827652	-1.24575
Os04g0556000		Heavy metal P-type ATPase, Xylem loading of copper	OsHMA8	-0.918368	-1.28731	-0.998591
Os03g0639200		Similar to DIRP family protein, expressed.		-0.916768	-1.44335	-0.786097
Os05g0169500		Hypothetical protein.		-0.916679	-1.04795	-1.23292
Os03g0591700		Conserved hypothetical protein.		-0.916666	-1.27871	-1.6081
Os01g0964800		Similar to PRAF1; Ran GTPase binding / chromatin binding / zinc ion binding.		-0.916175	-1.1834	-0.634367
Os06g0128600		Ankyrin repeat containing protein.		-0.915071	-0.754386	-1.07874
Os03g0225500		Nucleoporin, Common symbiosis signaling (SYM) pathway	NUP133	-0.912386	-0.666424	-0.743656
Os03g0151300		Similar to JmjC domain containing protein, expressed.	JMJ701	-0.909937	-1.22413	-0.699086
Os06g0568200		Vacuolar ATPase B subunit.	OsVHA-B, VHA-B	-0.907708	-1.15512	-0.808317
Os08g0276200		Similar to WRKY transcription factor 44 (WRKY DNA-binding protein 44) (TRANSPARENT TESTA GLABRA 2).	OsWRKY89	-0.903234	-1.14018	-0.804107
Os08g0340900		Pentatricopeptide repeat domain containing protein.		-0.902043	-0.9858	-1.03431
Os03g0784600		Conserved hypothetical protein.		-0.901717	-1.25179	-0.909572
Os11g0168200		Ribosomal large subunit protein L3B, Regulation of leaf morphology and plant architecture	OsRPL3B	-0.898985	-0.791814	-0.723813
Os01g0818700		Leucine-rich repeat, N-terminal domain containing protein.		-0.895314	-0.881644	-1.04373
Os07g0456700		Similar to (1, 4)-beta-xylan endohydrolase (EC 3.2.1.8).		-0.894475	-0.895272	-0.822247
Os11g0660000		Sodium/calcium exchanger membrane region domain containing protein.	OsMHX2, OsNCX14	-0.893401	-0.614456	-1.0989
Os04g0592700		WD40 repeat-like domain containing protein.	OsWD40-108	-0.891417	-0.563564	-0.827344
Os11g0232100		Protein kinase, core domain containing protein.		-0.891169	-0.927533	-0.869375
Os04g0269900		Conserved hypothetical protein.		-0.890921	-1.00655	-0.722452
Os05g0462400		Lipin, N-terminal conserved region domain containing protein.		-0.890413	-1.08356	-0.998594
Os08g0500800		WLM domain containing protein.		-0.889459	-0.511413	-1.42474
Os05g0100600		Similar to aminophospholipid ATPase.		-0.889079	-0.801332	-1.01501
Os08g0519600		Protein of unknown function DUF1666 family protein.		-0.887765	-0.659026	-0.664404
Os11g0129200		Multi antimicrobial extrusion protein MatE family protein.		-0.886756	-0.652021	-1.03276
Os11g0618500		Conserved hypothetical protein.		-0.885399	-0.82745	-0.818706
Os03g0802700		RH27 helicase (Fragment).	OsRH27	-0.885361	-0.55013	-0.616965
Os08g0525900		Similar to predicted protein.		-0.885193	-0.861333	-0.792755
Os05g0147150		Hypothetical conserved gene.		-0.884959	-1.10289	-1.09534
Os11g0685300		Hypothetical conserved gene.		-0.88176	-1.57035	-0.715165
Os09g0378300		Similar to Leucyl-tRNA synthetase, cytoplasmic (EC 6.1.1.4) (Leucine--tRNA ligase) (LeuRS).		-0.879998	-0.679978	-0.716632
Os03g0849800		Nucleotide-diphospho-sugar transferase domain containing protein.		-0.879588	-0.945732	-0.849276
Os06g0676600		Protein kinase, core domain containing protein.	OsRLCK213	-0.878766	-0.862409	-0.709616
Os05g0586200		Gretchen hagen 3 (GH3) family protein, Phytochrome, Jasmonate signaling		-0.877856	-0.652472	-0.983288
Os12g0500800		Conserved hypothetical protein.		-0.8755	-0.880008	-0.749772
Os10g0382600		Conserved hypothetical protein.		-0.875257	-0.921578	-0.817094
Os01g0713900		Similar to Myosin.		-0.874344	-1.53699	-0.779425
Os01g0919400		Sucrose phosphate synthase, Sucrose synthesis in pollen germination	OsSPS1	-0.874172	-1.27685	-0.960918
Os12g0155250		Hypothetical protein.		-0.87406	-1.32981	-0.7451
Os04g0624600		Starch synthase, Starch biosynthesis	OsSSIIIb	-0.872244	-0.985692	-0.963133
Os02g0636700		GRAM domain containing protein.		-0.87148	-0.677037	-0.877305
Os07g0141600		Similar to Serologically defined breast cancer antigen NY-BR-99.		-0.870589	-1.34325	-0.924818
Os02g0666250		Hypothetical gene.		-0.869726	-1.0445	-1.40399
Os09g0355400		Protein kinase, core domain containing protein.		-0.869354	-0.696215	-0.879242
Os11g0590700		NB-ARC domain containing protein.		-0.868818	-0.954458	-0.874013
Os04g0543200		Nucleotide-binding, alpha-beta plait domain containing protein.		-0.868221	-1.25217	-0.819252
Os04g0226340		Conserved hypothetical protein.		-0.867446	-1.28822	-0.785767
Os03g0288101		Conserved hypothetical protein.		-0.86303	-0.965407	-0.758075
Os04g0182600		Similar to predicted protein.		-0.862792	-1.17608	-0.832357
Os06g0292400		Embryogenesis transmembrane protein.		-0.861309	-1.20261	-0.786142
Os12g0611900		Glycosyl transferase, family 17 protein.		-0.86083	-0.721509	-0.698776
Os05g0398450		Hypothetical protein.		-0.860482	-0.940054	-0.709945
Os12g0203900		Hypothetical gene.		-0.859519	-0.649238	-0.700582
Os08g0520550		Similar to Auxin response factor 21.		-0.858942	-1.17496	-0.711767
Os04g0510400		Similar to RNA helicase (Fragment).	OsRH13	-0.858617	-0.5982	-0.932358
Os11g0112650		Hypothetical protein.		-0.857456	-1.1612	-0.792255
Os02g0744700		Similar to Starch synthase isoform zSTSII-2 (EC 2.4.1.21).	OsSSIIb	-0.857032	-1.17322	-0.819355
Os02g0665800		UspA domain containing protein.	OsPUB55, OsRLCK81	-0.856284	-1.073	-0.878616
Os12g0481100		Similar to cDNA clone:J033010C22, full insert sequence.	OsRH28	-0.855925	-0.675346	-0.938831
Os01g0700100		MtN3 and saliva related transmembrane protein family protein.	OsSWEET2b	-0.8553	-0.754896	-0.673045
Os03g0197050		Non-protein coding transcript.		-0.855287	-1.27164	-0.789359
Os04g0219000		Similar to cDNA, clone: J075169H23, full insert sequence.		-0.852105	-1.09507	-0.573555
Os01g0375000		GTP1/OBG domain containing protein.	Os_F0781	-0.852024	-0.480597	-0.65926
Os04g0675800		Similar to H0103C06.10 protein.	OsFbox238	-0.849303	-0.901559	-0.912079
Os03g0165100		Pentatricopeptide repeat domain containing protein.		-0.848949	-1.31501	-0.815552
Os01g0200700		Similar to Metallothionein-like protein type 3 (MT-3) (MWMT3).	OsMT3a	-0.84862	-0.756169	-0.968374
Os04g0568800		Similar to OSIGBa0139P06.4 protein.		-0.847497	-1.06641	-0.660208
Os10g0188275		Hypothetical protein.		-0.842398	-1.25569	-0.896902
Os06g0489500		CMP/dCMP deaminase, zinc-binding domain containing protein.		-0.841963	-1.05121	-0.893763
Os11g0485900		Similar to NB-ARC domain containing protein, expressed.	rNBS10	-0.840961	-0.796848	-0.713656
Os08g0191200		Pre-ATP-grasp fold domain containing protein.		-0.839163	-1.00059	-0.753331
Os01g0917500		Leucine-rich repeat receptor-like kinase, Specification of anther cell identity, Control of early sporogenic development, Initiation of anther wall formation	Msp1	-0.838439	-0.758866	-0.89955
Os03g0172000		Peptidase S59, nucleoporin family protein.	OsNucAP1	-0.836351	-0.746802	-0.846766
Os01g0369700		Similar to Glutathione S-transferase GST 8 (EC 2.5.1.18).	OsGSTF5	-0.834483	-0.631066	-1.03928
Os06g0492000		Similar to Phosphatidylinositol synthase.		-0.834477	-1.12273	-0.707291
Os08g0243500		Similar to NADPH-cytochrome P450 oxydoreductase isoform 2.	OsCPR2	-0.833165	-0.62181	-1.03183
Os12g0233200		Hypothetical conserved gene.		-0.832438	-1.15301	-0.831586
Os05g0560300		Protein kinase, core domain containing protein.		-0.831414	-0.622238	-0.846249
Os08g0453700		Similar to ATRBOH F (ARABIDOPSIS THALIANA RESPIRATORY BURST OXIDASE PROTEIN F); NAD(P)H oxidase.		-0.829838	-0.588405	-0.754104
Os10g0495500		Hypothetical conserved gene.		-0.828981	-0.561855	-0.669097
Os04g0566900		Spc97/Spc98 domain containing protein.		-0.828071	-1.10422	-0.825316
Os02g0211000		Conserved hypothetical protein.	OsABCA1	-0.827496	-0.818163	-1.06974
Os01g0248500		Similar to Pathogen-related protein.		-0.826783	-0.886708	-0.776311
Os01g0104800		Sas10/Utp3 family protein.		-0.823941	-0.598926	-0.769492
Os04g0483400		Similar to H0805A05.2 protein.		-0.823779	-0.818824	-0.792503
Os01g0364400		Protein kinase, catalytic domain domain containing protein.	OsRLCK35	-0.822125	-1.10316	-0.502995
Os10g0167500		Hypothetical conserved gene.		-0.821008	-1.0099	-0.70781
Os09g0554300		Auxin efflux carrier domain containing protein.		-0.820992	-0.666683	-0.800169
Os11g0597700		Similar to Resistant protein.		-0.819813	-0.962081	-0.774962
Os08g0411900		Conserved hypothetical protein.		-0.817397	-1.15326	-0.793954
Os02g0504050		Hypothetical conserved gene.		-0.815715	-1.08163	-0.759301
Os01g0824600		Serine/threonine protein kinase domain containing protein.	OsCIPK11	-0.815027	-0.659324	-0.941478
Os05g0482700		Similar to 2, 3-bisphosphoglycerate-independent phosphoglycerate mutase (EC 5.4.2.1) (Phosphoglyceromutase) (BPG-independent PGAM) (PGAM-I).		-0.814819	-0.929438	-0.804848
Os11g0209700		Hypothetical conserved gene.	OsPI4K1	-0.814679	-1.15757	-0.848074
Os05g0374500		Tetratricopeptide-like helical domain containing protein.		-0.814641	-1.16945	-0.707955
Os12g0148600		Conserved hypothetical protein.		-0.814252	-0.578967	-0.807832
Os04g0520900		Pentatricopeptide repeat domain containing protein.		-0.813792	-0.773841	-0.648423
Os07g0211000		Hypothetical conserved gene.		-0.812646	-0.90726	-0.780982
Os02g0176700		Similar to autoinhibited calcium ATPase.	OsACA2, OsPM2ATP9	-0.812268	-1.06611	-0.602037
Os02g0611000		Hypothetical gene.		-0.81123	-1.17414	-0.814816
Os06g0731600		ARID/BRIGHT DNA-binding domain domain containing protein.		-0.809944	-1.10848	-0.624194
Os10g0465700		Similar to Beta-amylase PCT-BMYI (EC 3.2.1.2).	OsSTA246, OsBamy1	-0.809826	-0.978069	-1.05067
Os08g0524501		Conserved hypothetical protein.		-0.809449	-0.772536	-0.736925
Os02g0179950		Hypothetical protein.		-0.808747	-0.894427	-0.5506
Os09g0434100		Conserved hypothetical protein.		-0.807576	-1.01266	-0.745757
Os03g0712700		Cytosolic phosphoglucomutase	PFP, OscPGM	-0.805905	-1.23059	-0.676675
Os02g0153900		Protein kinase, core domain containing protein.	LRK3	-0.803264	-0.608633	-0.753562
Os01g0920100		Conserved hypothetical protein.		-0.801477	-0.499889	-0.959888
Os11g0226550		Hypothetical protein.		-0.800094	-1.23916	-0.857236
Os08g0104900		Protein of unknown function DUF6, transmembrane domain containing protein.		-0.798241	-0.564694	-0.735773
Os12g0562400		Similar to Phospholipase C (Fragment).		-0.797465	-0.711214	-0.715358
Os06g0144000		BRCT domain containing protein.	OsXRCC1	-0.796867	-0.630161	-0.767497
Os06g0146250		Similar to WRKY transcription factor 73.	OsWRKY73	-0.796222	-1.3168	-0.681417
Os01g0275800		Hypothetical gene.		-0.796072	-1.81922	-0.731334
Os02g0664150		Hypothetical gene.		-0.795159	-1.17348	-0.732902
Os02g0142450		Hypothetical gene.		-0.794112	-0.843784	-0.779772
Os04g0616700		Hypothetical conserved gene.		-0.788927	-0.734516	-0.828944
Os07g0496500		Hypothetical protein.		-0.78875	-1.10098	-0.594716
Os02g0621300		Fatty acid hydroxylase domain containing protein.	OsCER1, OsGL1-4	-0.788609	-0.974879	-1.04151
Os02g0228300		Protein kinase, core domain containing protein.		-0.788106	-0.88355	-0.84731
Os05g0534900		Pentatricopeptide repeat domain containing protein.		-0.788065	-0.845553	-0.6871
Os01g0898300		Mitochondrial protein, Root development and iron homeostasis		-0.787958	-0.725195	-0.806861
Os03g0333100		Protein of unknown function DUF663 domain containing protein.		-0.787827	-0.595911	-0.805756
Os03g0840500		Conserved hypothetical protein.		-0.786425	-0.906998	-0.710618
Os09g0419100		Hypothetical protein.		-0.78514	-0.677594	-0.689507
Os06g0137166		Hypothetical gene.		-0.783285	-0.800193	-0.957293
Os04g0673000		Similar to H0322F07.7 protein.		-0.7822	-0.956217	-0.965725
Os08g0295100		Ubiquitin domain containing protein.		-0.778749	-1.11428	-0.60869
Os03g0746700		Conserved hypothetical protein.		-0.77792	-0.836219	-0.711633
Os12g0456100		Hypothetical conserved gene.		-0.777133	-1.03317	-0.793018
Os06g0589300		ABC transporter-like domain containing protein.	OsABCA2, OsISC27	-0.77668	-0.769443	-0.800484
Os01g0711000		Similar to Vacuolar ATP synthase subunit B isoform 2 (EC 3.6.3.14) (V-ATPase B subunit 2) (Vacuolar proton pump B subunit 2).		-0.776609	-0.87803	-0.837093
Os02g0598300		Conserved hypothetical protein.		-0.775919	-1.02704	-0.692591
Os06g0684000		Similar to FAD-dependent pyridine nucleotide-disulphide oxidoreductase; Calcium-binding EF-hand.		-0.775765	-0.729667	-0.892088
Os07g0170300		YT521-B-like protein family protein.	0	-0.775395	-0.415215	-0.586409
Os10g0495600		Similar to DNA-directed RNA polymerase.		-0.773996	-0.661418	-0.716725
Os03g0399532		Similar to phosphatidylinositol-4-phosphate 5-kinase family protein.		-0.773129	-0.767267	-0.9457
Os01g0634300		Conserved hypothetical protein.	OsDjC11	-0.771723	-0.798924	-0.930206
Os10g0534900		Similar to Prep (Fragment).		-0.770815	-0.864041	-0.717531
Os01g0911200		Ribophorin II family protein.	0	-0.769906	-0.886538	-0.648642
Os06g0700500		Protein of unknown function DUF266, plant family protein.		-0.769526	-0.630232	-0.636253
Os03g0234350		Non-protein coding transcript.		-0.768854	-0.664311	-0.751562
Os08g0351300		Conserved hypothetical protein.		-0.767325	-0.744926	-0.881281
Os04g0614650		Similar to OSIGBa0126B18.8 protein.		-0.767011	-1.53013	-0.70508
Os03g0669800		Zinc finger, FYVE-type domain containing protein.		-0.766976	-0.894921	-0.729269
Os06g0103800		Protein of unknown function DUF125, transmembrane family protein.		-0.766432	-0.964138	-0.741455
Os12g0565166		Non-protein coding transcript.		-0.765498	-0.88111	-0.993883
Os09g0413600		Ribosomal protein L34e domain containing protein.		-0.76547	-0.501879	-0.793917
Os03g0626600		Zinc finger, LIM-type domain containing protein.		-0.765432	-0.653247	-1.00997
Os02g0792100		Conserved hypothetical protein.		-0.764698	-0.637241	-0.965579
Os02g0166200		Non-protein coding transcript.		-0.764592	-0.992801	-0.866074
Os03g0139200		Cytochrome c region domain containing protein.		-0.764313	-0.764958	-0.519731
Os06g0303700		Similar to Myb-like DNA-binding domain containing protein.		-0.762278	-0.846846	-0.966944
Os12g0628100		Similar to Actin-depolymerizing factor 6 (ADF-6) (AtADF6).	OsADF11	-0.761348	-0.838476	-0.795185
Os11g0308432		Hypothetical conserved gene.		-0.761063	-1.29231	-0.85502
Os05g0332300		Similar to CBL-interacting protein kinase 2.	OsCIPK18	-0.760912	-0.559575	-1.18308
Os01g0115900		Similar to Receptor-like protein kinase.		-0.759934	-0.589609	-0.855874
Os06g0138700		Cyclin-like F-box domain containing protein.	OsFbox290, Os_F0343	-0.759503	-0.840344	-0.660553
Os09g0362900		SET domain containing protein.	OsSET35, OsSUVH6	-0.759294	-0.722659	-0.869185
Os07g0122200		Protein of unknown function DUF1719, Oryza sativa family protein.		-0.756099	-0.736362	-0.822323
Os09g0503400		Leucyl-tRNA synthetase, class Ia, archaeal/eukaryotic cytosolic domain containing protein.		-0.755075	-0.656664	-0.493729
Os09g0498000		Hypothetical gene.		-0.753717	-0.764571	-0.697457
Os03g0747600		Similar to Acetyltransferase, GNAT family protein, expressed.		-0.7535	-0.993342	-0.640993
Os05g0539800		Protein of unknown function DUF778 family protein.	OsRTH2	-0.753299	-0.711201	-0.649989
Os08g0496900		Nonaspanin (TM9SF) family protein.		-0.752893	-0.726747	-0.614027
Os03g0419100		Protein of unknown function DUF1675 family protein.		-0.750385	-0.867433	-0.765583
Os06g0700000		Peptidase S8, subtilisin-related domain containing protein.	OsSub52	-0.7486	-0.682111	-0.78986
Os06g0621500		Conserved hypothetical protein.		-0.747985	-0.677378	-0.696094
Os01g0147700		Region of unknown function XH domain containing protein.		-0.747459	-0.721514	-0.918718
Os11g0547000		Autonomous floral activator, Promotion of flowering	OsFbox609, OsFKF1	-0.747225	-1.07156	-0.728366
Os01g0655400		Conserved hypothetical protein.		-0.74662	-1.071	-0.685446
Os01g0359600		Disease resistance protein domain containing protein.		-0.745542	-1.11595	-0.483617
Os10g0376200		Leucine-rich repeat, typical subtype containing protein.		-0.745495	-0.495126	-0.698553
Os04g0542200		Similar to H0501D11.7 protein.	OsYSL9	-0.745369	-0.862388	-0.996092
Os04g0337201		Similar to OSIGBa0137O04.8 protein.		-0.745336	-0.86005	-0.554494
Os04g0403900		Similar to H0502B11.1 protein.		-0.744818	-0.716364	-1.0531
Os03g0784700		Ferredoxin--NADP reductase, root isozyme, chloroplast precursor (EC 1.18.1.2) (FNR).	FNR, PetH	-0.744775	-0.571858	-0.8128
Os04g0430950		Hypothetical protein.		-0.743681	-1.30052	-0.703638
Os01g0113350		Hypothetical conserved gene.		-0.743343	-0.851535	-0.776319
Os03g0203100		Nucleolar 27S pre-rRNA processing, Urb2/Npa2, C-terminal domain containing protein.		-0.742355	-0.560305	-0.553304
Os06g0354700		Alpha/beta hydrolase-fold family protein, Chlorophyll degradation during senescence	OsNYC3, PPH	-0.741201	-0.466243	-0.737081
Os09g0549450		Similar to NIN-like protein 1.		-0.741036	-0.576352	-0.89219
Os09g0559800		Similar to Transporter-like protein.		-0.739903	-0.612187	-0.748015
Os01g0585100		Similar to Integral membrane protein.		-0.73786	-0.66499	-0.90405
Os03g0235400		Hypothetical protein.		-0.736551	-0.978615	-0.744351
Os10g0579600		TGF-beta receptor, type I/II extracellular region family protein.		-0.736416	-0.684624	-0.894778
Os04g0675200		Similar to H0103C06.6 protein.		-0.736182	-1.07272	-0.638264
Os10g0162832		Similar to LRR14.		-0.735996	-0.563688	-0.674048
Os02g0266200		Pentatricopeptide repeat domain containing protein.		-0.735837	-0.635215	-0.98745
Os04g0461700		Non-protein coding transcript.		-0.733354	-1.03451	-0.876701
Os01g0120800		Similar to Eukaryotic translation initiation factor 3 subunit 10 (eIF-3 theta) (Eukaryotic translation initiation factor 3 large subunit) (eIF3a).		-0.733294	-0.500272	-0.568195
Os03g0395300		Protein of unknown function DUF827, plant family protein.		-0.733096	-0.840747	-0.816109
Os01g0316600		Similar to pre-mRNA-splicing factor SF2.		-0.73284	-0.468745	-1.07694
Os03g0598200		Nop14-like protein family protein.		-0.732144	-0.689448	-0.7408
Os02g0106700		Peptidase C78, ubiquitin fold modifier-specific peptidase 1/ 2 domain containing protein.		-0.73082	-0.783593	-0.945685
Os07g0177100		Armadillo-type fold domain containing protein.	MMS19	-0.72966	-0.898889	-0.661537
Os11g0634200		Conserved hypothetical protein.		-0.729653	-0.472043	-0.834169
Os10g0209700		Heavy metal transport/detoxification protein domain containing protein.		-0.729167	-0.76898	-0.470596
Os09g0314200		Disease resistance protein domain containing protein.		-0.729078	-1.01258	-0.739171
Os10g0550000		Protein of unknown function DUF3741 domain containing protein.		-0.728573	-0.805121	-0.477634
Os06g0729300		Similar to AGO1 homologous protein.	OsAGO1d	-0.728573	-0.981568	-0.668944
Os11g0145200		UDP-glucuronosyl/UDP-glucosyltransferase family protein.		-0.727087	-0.995733	-0.99419
Os09g0509350		Hypothetical protein.		-0.726472	-1.04401	-0.920452
Os10g0362300		Similar to Histidine kinase 3.	OsHK5	-0.726052	-0.640689	-0.884565
Os01g0520600		NB-ARC domain containing protein.		-0.72425	-0.59506	-0.788523
Os06g0506100		Pentatricopeptide repeat domain containing protein.		-0.722254	-1.02793	-0.694753
Os04g0434300		MiaB-like tRNA modifying enzyme, archaeal-type domain containing protein.		-0.721372	-0.462874	-0.765975
Os02g0110400		Sugar transporter, conserved site domain containing protein.		-0.72092	-0.635292	-0.817454
Os07g0122300		Protein of unknown function DUF1719, Oryza sativa family protein.		-0.72046	-0.706535	-1.13602
Os10g0473400		Beta-glucosidase, GBA2 type domain containing protein.		-0.718626	-1.0516	-0.564234
Os08g0139700		Similar to terpene synthase 6.	OsTPS29, OsCAS	-0.718404	-0.676166	-0.77453
Os04g0529400		Similar to OO_Ba0013J05-OO_Ba0033A15.30 protein.	OsWD40-104	-0.717969	-0.61644	-0.595877
Os07g0273900		Disease resistance protein domain containing protein.		-0.716614	-0.962154	-0.644601
Os06g0340200		Zinc finger, RING-CH-type domain containing protein.		-0.71619	-0.695657	-0.534326
Os03g0800800		Forkhead-associated domain containing protein.		-0.715582	-0.509445	-0.683524
Os01g0851700		Similar to Cytosolic starch phosphorylase (Fragment).	OsPho2	-0.71339	-0.540661	-0.974403
Os02g0555600		Amino acid-binding ACT domain containing protein.		-0.713249	-0.629826	-0.713196
Os03g0839900		Serine/threonine protein kinase-related domain containing protein.	OsRLCK122	-0.712273	-0.613102	-0.687935
Os02g0290000		Pentatricopeptide repeat domain containing protein.		-0.711802	-0.661602	-0.48846
Os11g0704300		GTP1/OBG subdomain containing protein.		-0.711722	-0.755418	-0.924521
Os03g0228200		Conserved hypothetical protein.		-0.711197	-0.724486	-0.794668
Os07g0626200		DNA-binding SAP domain containing protein.		-0.710679	-0.960293	-0.875025
Os06g0558766		Similar to predicted protein.		-0.708048	-1.22231	-0.629023
Os07g0124500		Similar to Eukaryotic translation initiation factor 3 subunit 8 (eIF3 p110) (eIF3c).		-0.707763	-0.629451	-0.506113
Os08g0169700		Similar to predicted protein.		-0.707611	-0.577294	-0.790147
Os01g0646800		Conserved hypothetical protein.		-0.707166	-0.936633	-0.699303
Os04g0641400		Similar to H0423H10.3 protein.		-0.707157	-0.95902	-0.948361
Os12g0631100		Small GTPase, Storage protein trafficking	OsRab5B2	-0.706468	-1.12513	-0.683331
Os05g0501600		Leucine-rich repeat, typical subtype containing protein.		-0.706393	-0.748981	-0.76007
Os11g0223201		Similar to NB-ARC domain containing protein, expressed.		-0.70586	-1.13994	-0.777748
Os04g0643550		Hypothetical protein.		-0.704606	-0.872438	-0.587762
Os02g0649800		Similar to Cytochrome B5 homolog (Fragment).		-0.704595	-0.540232	-0.760949
Os06g0538200		Conserved hypothetical protein.		-0.703408	-0.917774	-0.691599
Os07g0693400		Importin-beta, N-terminal domain containing protein.		-0.701201	-0.847	-0.618401
Os09g0558200		Homeodomain-like containing protein.		-0.697282	-0.995033	-0.679647
Os03g0583900		DEAD-like helicase, N-terminal domain containing protein.	OsDCL2a	-0.697239	-0.870343	-0.888119
Os12g0167900		Ribosomal protein L3A	OsRPL3A	-0.697095	-0.554393	-0.502935
Os07g0483500		Similar to Phosphoribosyltransferase (Fragment).		-0.697	-0.815623	-0.676211
Os01g0668901		Protein kinase, catalytic domain domain containing protein.		-0.696814	-0.914542	-0.92801
Os01g0749300		Heat shock transcription factor, Cadmium tolerance, Heat stress response	OsHsfA4a, OsHSF9	-0.695892	-0.612996	-0.671238
Os01g0142500		Homeodomain-like containing protein.	0	-0.694535	-0.70644	-0.768246
Os01g0775100		Plus-3 domain containing protein.		-0.694396	-0.870068	-0.651334
Os04g0519912		Hypothetical protein.		-0.694385	-0.697774	-0.764143
Os03g0781700		Reticulon family protein.		-0.693495	-0.599654	-0.742825
Os05g0274200		DNA mismatch repair protein MSH2 (MUS1).		-0.693193	-0.778119	-0.606779
Os03g0426900		Similar to Heat shock protein 101.	OsClpB-c	-0.691786	-0.833384	-0.613864
Os09g0493800		Similar to Chaperone protein dnaJ 10 (AtJ10) (AtDjC10).	OsDjC70	-0.688584	-0.683592	-0.75607
Os12g0132200		Similar to CBL-interacting protein kinase 32.	OsCIPK32	-0.688149	-0.688349	-0.822385
Os11g0629500		Similar to Phosphoserine phosphatase, chloroplast precursor (EC 3.1.3.3) (PSP) (O-phosphoserine phosphohydrolase) (PSPase).		-0.687836	-0.66068	-0.686486
Os05g0113400		Similar to Actin-depolymerizing factor 2 (ADF 2).	OsADF7	-0.687257	-0.857767	-0.75156
Os03g0151700		Similar to WD repeat protein (Fragment).	OsWD40-63	-0.68601	-0.537693	-0.598388
Os04g0467100		Similar to OSIGBa0115M15.9 protein.		-0.686003	-0.669668	-0.687745
Os08g0366000		Phosphoenolpyruvate carboxylase.	Osppc2a	-0.684455	-0.950981	-0.542757
Os12g0631200		Zinc finger, C6HC-type domain containing protein.		-0.683334	-0.721823	-0.729881
Os05g0317700		Similar to Resistance protein candidate (Fragment).	OsCrRLK1L12	-0.683047	-0.723019	-0.741945
Os03g0343300		Small-subunit processome, Utp14 domain containing protein.		-0.682089	-0.658916	-0.621714
Os03g0103700		Non-protein coding transcript.		-0.681712	-0.950948	-0.666768
Os04g0573000		SPX-MFS protein, Phosphate transporter, Pi homeostasis	OsSPX-MFS1	-0.681389	-0.561194	-0.918276
Os02g0600400		Similar to Glucose-6-phosphate dehydrogenase.	OsG6PDH1	-0.680028	-0.719029	-0.765071
Os01g0375100		Similar to DnAJ-like protein slr0093.	OsDjC6	-0.679925	-0.773569	-0.710397
Os11g0697100		Non-protein coding transcript.		-0.679918	-1.23904	-0.570856
Os08g0159900		DEAD-like helicase, N-terminal domain containing protein.	PRP5, OsRH42	-0.679596	-0.934481	-0.600291
Os08g0537600		Arf GTPase activating protein family protein.		-0.678974	-0.647257	-0.516966
Os10g0564500		Serine/threonine protein kinase, Hyperosmotic stress response	OsSAPK3	-0.678787	-0.62458	-0.953812
Os12g0511500		Disease resistance protein domain containing protein.		-0.678382	-0.905118	-0.72417
Os07g0477500		Histone deacetylation protein Rxt3 domain containing protein.		-0.677666	-0.918896	-0.542557
Os04g0501500		BTB domain containing protein.		-0.677036	-0.620881	-0.726842
Os06g0645400		Similar to Isoleucine-tRNA ligase-like protein.		-0.676459	-0.535176	-0.570347
Os06g0648200		Conserved hypothetical protein.		-0.675858	-0.973115	-0.823201
Os11g0161700		Conserved hypothetical protein.		-0.675039	-0.718392	-0.956613
Os01g0777700		Similar to acid phosphatase/ oxidoreductase/ transition metal ion binding.		-0.674924	-1.05107	-0.625544
Os10g0559650		Hypothetical protein.		-0.674238	-0.939165	-0.557665
Os06g0644600		Similar to predicted protein.	OsWD40-131	-0.673838	-0.541784	-0.568341
Os10g0136100		Similar to Hv1LRR2.	0	-0.673572	-0.597042	-0.572651
Os03g0586800		Similar to Lysyl-tRNA synthetase (EC 6.1.1.6) (Lysine--tRNA ligase) (LysRS).		-0.673219	-0.431681	-0.609465
Os03g0101500		Similar to Phosphoglycerate mutase family protein.		-0.672185	-0.770351	-0.654897
Os12g0166500		Similar to Nrap protein, expressed.		-0.672085	-0.43916	-0.511193
Os04g0641000		Similar to DNA-directed RNA polymerase.		-0.671884	-0.615621	-0.738997
Os01g0275600		Similar to Argonaute 4 protein.	OsAGO4a	-0.671036	-0.889153	-0.610823
Os06g0143100		Similar to Cadmium tolerant 1.	OsCDT2	-0.670704	-0.683461	-0.654234
Os06g0701300		Similar to ABC1 family protein.		-0.670595	-0.599364	-0.656986
Os01g0934500		Hypothetical protein.		-0.670202	-0.822761	-0.594603
Os10g0437200		Similar to Nucleolar protein-like.		-0.669977	-0.408149	-0.505049
Os08g0559900		PAP/25A core domain containing protein.		-0.669779	-0.571091	-0.587958
Os05g0534800		Hypothetical conserved gene.		-0.669568	-0.570451	-0.91007
Os06g0677800		Similar to P-167-1_1 (Fragment).	OsARF17	-0.668805	-0.479818	-0.87608
Os01g0347100		Protein of unknown function DUF1399 family protein.		-0.668553	-0.557619	-0.729872
Os05g0592400		UV-damaged DNA binding protein.	OsUV-DDB1	-0.668266	-0.749535	-0.556261
Os04g0402100		Similar to Calnexin (Fragment).	OsCNX	-0.660994	-0.499115	-0.763413
Os08g0296700		NB-ARC domain containing protein.	YR36	-0.660898	-0.675214	-0.605497
Os09g0478100		Cellulose synthase family protein.	OsCSLE1	-0.660786	-0.622482	-0.738605
Os01g0878300		Protein kinase, core domain containing protein.		-0.660394	-1.31952	-0.955769
Os03g0789466		Similar to Protein argonaute MEL1.		-0.659998	-0.837871	-0.827235
Os01g0894000		Metallophosphoesterase domain containing protein.		-0.659465	-0.620392	-0.677519
Os04g0209300		Similar to Glutathione-conjugate transporter AtMRP4.	OsABCC10, OsMRP10	-0.657214	-0.527207	-0.802361
Os01g0550100		Similar to Ubiquitin-specific protease 6.		-0.655974	-0.670632	-0.645408
Os01g0360200		Similar to Respiratory burst oxidase homolog.	OsRbohB, OsNox1	-0.655781	-0.935617	-0.728538
Os03g0270700		Conserved hypothetical protein.		-0.654163	-0.332694	-0.633927
Os11g0550500		Similar to LZ-NBS-LRR class RGA.		-0.652411	-0.65566	-0.707077
Os07g0630800		Similar to Nodule-enhanced malate dehydrogenase.		-0.65213	-0.729452	-0.564684
Os08g0554400		Zinc finger, C2H2-type domain containing protein.	OsIDD6	-0.650375	-0.918807	-0.556503
Os11g0148800		Zinc finger, FYVE/PHD-type domain containing protein.		-0.648575	-0.789001	-0.624221
Os10g0163100		Similar to Autophagy protein Apg9 containing protein, expressed.	OsATG9b	-0.64856	-0.687747	-0.65953
Os11g0686400		Similar to WRKY transcription factor 41.	OsWRKY41	-0.647943	-0.760259	-0.656594
Os06g0600700		Agenet domain containing protein.		-0.64723	-0.881055	-0.584073
Os12g0576900		Similar to Diacylglycerol kinase 1 (EC 2.7.1.107) (Diglyceride kinase 1) (DGK 1) (DAG kinase 1).		-0.647126	-0.661662	-0.740496
Os05g0592600		Translation initiation factor 2 related domain containing protein.		-0.646087	-0.821829	-0.409402
Os06g0146200		Conserved hypothetical protein.		-0.645528	-0.664856	-0.589819
Os03g0322800		Engulfment and cell motility, ELM domain containing protein.		-0.645313	-0.727465	-0.582733
Os05g0208000		Similar to 2-oxoglutarate/malate translocator.		-0.644397	-0.828037	-0.604192
Os02g0520750		Similar to H0209H04.3 protein.		-0.643934	-0.527265	-0.931912
Os02g0164300		Similar to beta-1, 3-galactosyltransferase sqv-2.		-0.643392	-0.514472	-0.61993
Os03g0387900		Conserved hypothetical protein.		-0.642272	-0.554803	-0.737711
Os11g0246900		Ankyrin repeat containing protein.		-0.642214	-0.618885	-0.668991
Os07g0555200		Similar to Eukaryotic translation initiation factor 4g (Fragment).	tsv1, eIF4G	-0.642189	-0.763677	-0.507414
Os12g0580900		Similar to Protein phosphatase 2C-like protein.	OsPP2C78, OsPP131	-0.641637	-0.586817	-0.630423
Os01g0952200		DNA/RNA helicase, C-terminal domain containing protein.	OsFbox58, Os_F0591	-0.640713	-0.671387	-0.631154
Os04g0349700		Leucine-rich repeat, typical subtype containing protein.		-0.639896	-0.511899	-0.647323
Os04g0644750		Hypothetical protein.		-0.637612	-0.68916	-0.469009
Os04g0628000		Protein of unknown function DUF794, plant family protein.	OsISC40	-0.63714	-0.676842	-0.826064
Os07g0562950		Non-protein coding transcript.		-0.63609	-0.707592	-0.417387
Os01g0968600		Leucine-rich repeat, cysteine-containing subtype domain containing protein.		-0.635784	-0.857422	-0.88435
Os10g0457700		Similar to chromatin remodeling complex subunit.		-0.635578	-0.955733	-0.61279
Os04g0182650		Similar to predicted protein.		-0.635148	-0.940028	-0.601493
Os08g0180500		Zinc finger, BED-type predicted domain containing protein.		-0.634946	-0.623897	-0.473797
Os12g0230100		Similar to ATP-dependent Clp protease ATP-binding subunit clpA homolog, chloroplast precursor (Fragment).		-0.634863	-0.808012	-0.59752
Os06g0186600		Conserved hypothetical protein.		-0.633435	-1.07899	-0.743177
Os01g0540800		Conserved hypothetical protein.		-0.633383	-0.76006	-0.519654
Os08g0508500		Similar to predicted protein.	JMJ717	-0.633164	-0.53885	-0.981541
Os06g0644700		Amino acid transporter, transmembrane domain containing protein.	OsATL1	-0.631889	-0.772128	-0.646976
Os02g0793100		Armadillo-type fold domain containing protein.		-0.631766	-0.829473	-0.757811
Os02g0105100		Sec16, central conserved domain domain containing protein.		-0.62944	-0.671656	-0.449696
Os05g0392100		Similar to glycine-rich protein.		-0.629279	-0.761843	-0.591692
Os01g0815400		Conserved hypothetical protein.		-0.629135	-0.600919	-0.709072
Os08g0416800		Conserved hypothetical protein.		-0.62805	-0.548969	-0.668322
Os03g0147700		Similar to EMB1691 (EMBRYO DEFECTIVE 1691); S-adenosylmethionine-dependent methyltransferase/ methyltransferase/ nucleic acid binding.		-0.626965	-0.623345	-0.528232
Os08g0535800		No apical meristem (NAM) protein domain containing protein.	ONAC5	-0.626793	-0.494655	-0.742138
Os11g0484400		Similar to bifunctional dihydrofolate reductase-thymidylate synthase.		-0.626515	-0.592149	-0.662971
Os02g0218200		Peptidase M1, membrane alanine aminopeptidase family protein.		-0.625923	-0.570217	-0.603506
Os08g0192200		Conserved hypothetical protein.	0	-0.625541	-0.772804	-0.783229
Os12g0613200		Hypothetical conserved gene.	OsSET43, SDG717	-0.625478	-0.679167	-0.55706
Os09g0376900		Similar to Potassium transporter 13 (AtPOT13) (AtKT5).	OsHAK23	-0.624173	-0.722497	-0.652612
Os04g0620400		SIT4 phosphatase-associated protein family protein.		-0.623829	-0.731822	-0.685569
Os09g0508300		Zinc finger, DHHC-type domain containing protein.		-0.623025	-0.798037	-0.533834
Os02g0722800		WD40 repeat-like domain containing protein.	OsWD40-53	-0.622677	-0.619493	-0.651459
Os08g0133600		Conserved hypothetical protein.		-0.622129	-0.675582	-0.754759
Os02g0557600		Translation initiation factor SUI1 domain containing protein.		-0.622013	-0.404362	-0.741408
Os02g0129700		Hypothetical protein.		-0.621171	-0.79323	-0.464219
Os11g0135900		Major facilitator superfamily protein.	OsZIFL7	-0.620489	-0.713302	-0.875435
Os03g0577500		Similar to Avr9 elicitor response-like protein.		-0.620373	-0.49913	-0.534361
Os01g0563000		Hypothetical conserved gene.	OsFKBP73	-0.620299	-0.615903	-0.613209
Os05g0430300		Protein of unknown function DUF668 family protein.		-0.620247	-0.635957	-0.576691
Os01g0958700		Membrane attack complex component/perforin/complement C9 family protein.		-0.618555	-0.635451	-0.623402
Os12g0490000		Hypothetical conserved gene.		-0.617797	-0.812296	-0.66454
Os04g0438600		Glycolipid transfer protein, GLTP domain containing protein.		-0.616988	-0.8126	-1.03328
Os05g0519400		Homologue of NSF (N-ethylmaleimide sensitive factor), ATPase, Regulation of vacuolar morphology in endosperm cell	OsSec18	-0.616764	-0.551826	-0.600912
Os05g0317200		AMP-dependent synthetase and ligase domain containing protein.	LACS8	-0.616357	-0.781385	-0.657626
Os03g0179900		Similar to Avr9/Cf-9 rapidly elicited protein 44 (Fragment).	OsLOX2	-0.616184	-0.749154	-0.531868
Os02g0220500		Elongation factor 1-gamma (EF-1-gamma) (eEF-1B gamma).	0	-0.61569	-0.525936	-0.447112
Os11g0586300		Conserved hypothetical protein.		-0.615422	-0.497333	-0.808182
Os04g0608800		YT521-B-like protein family protein.		-0.613903	-0.497798	-0.657693
Os03g0186500		Myoactive tetradecapeptides family protein.		-0.61359	-0.756561	-0.464491
Os01g0367900		Similar to Possible global transcription activator SNF2L1 (SWI/SNF related matrix associated actin dependent regulator of chromatin subfamily A member 1).		-0.613112	-0.664398	-0.608744
Os10g0548700		Receptor-like cytoplasmic kinase, Various stress responses, Regulation of resistance to bacterial leaf streak (BLS)	OsPUB54, OsRLCK306	-0.612501	-0.526813	-0.562802
Os05g0241000		Prefoldin domain containing protein.		-0.612182	-0.515263	-0.565938
Os05g0224900		Similar to Cytosine-specific methyltransferase.	OsCMT3	-0.612133	-0.793486	-0.58405
Os04g0605300		Leucine-rich repeat, typical subtype containing protein.	OsIRL1	-0.610915	-0.519415	-0.76565
Os04g0476800		Similar to TA5 protein (Fragment).	0	-0.610802	-0.725326	-0.620646
Os01g0184200		Similar to OSIGBa0132G14.1 protein.	0	-0.610636	-0.510813	-0.485306
Os01g0897800		Rad21/Rec8 like protein, C-terminal domain containing protein.		-0.610532	-0.701111	-0.502241
Os03g0372500		Hypothetical gene.	OsPP52	-0.609708	-0.662849	-0.607238
Os09g0510700		Similar to GCN4-complementing protein homolog.		-0.609608	-0.709508	-0.550699
Os11g0242100		Beta-glucosidase, GBA2 type domain containing protein.		-0.609463	-0.667782	-0.691098
Os12g0160400		Basic helix-loop-helix dimerisation region bHLH domain containing protein.	OsbHLH150	-0.608827	-0.539131	-0.494328
Os12g0406100		Glycoside hydrolase, family 43 protein.		-0.607461	-0.570272	-0.591378
Os03g0325500		Similar to Phosphate starvation regulator protein (Regulatory protein of P- starvation acclimation response Psr1).		-0.606823	-0.435136	-0.404144
Os10g0556700		CCR4-Not1 complex component, mRNA deadenylation		-0.60595	-0.732602	-0.546791
Os08g0493900		WD40 repeat-like domain containing protein.	OsWD40-161	-0.605025	-0.736584	-0.470496
Os10g0513200		Boric acid channel, Regulation of boron distribution	OsNIP3.1, NIP3.1	-0.604934	-0.486896	-0.716428
Os11g0148500		Cytosolic pyruvate kinase, Plant morphological development	OsPK1	-0.604563	-0.549941	-0.655217
Os04g0433600		Protein of unknown function DUF668 family protein.		-0.604078	-0.538725	-0.74679
Os01g0125900		Ubiquitin-conjugating enzyme/RWD-like domain containing protein.	OsUBC34	-0.603567	-0.702262	-0.563566
Os03g0238800		Conserved hypothetical protein.		-0.602963	-0.545072	-0.734997
Os02g0227000		HAD superfamily hydrolase-like, type 3 domain containing protein.		-0.602848	-0.478901	-0.589061
Os12g0502200		Similar to Low temperature-responsive RNA-binding protein.	OsGRP6	-0.602778	-0.520236	-0.690692
Os05g0107900		Similar to Protein DEHYDRATION-INDUCED 19 homolog 6.	OsDi19-6	-0.601828	-0.858251	-0.532069
Os02g0725100		Thioredoxin fold domain containing protein.		-0.601558	-0.390902	-0.521955
Os10g0492000		Conserved hypothetical protein.		-0.601151	-0.687316	-0.54021
Os09g0131400		Hypothetical protein.		-0.60088	-0.738929	-0.500129
Os01g0254100		Similar to CTV.2.	OsWD40-12, TPR1	-0.600769	-0.609725	-0.750169
Os01g0256800		Similar to zinc finger helicase family protein.	OsC3H4	-0.600633	-0.709569	-0.565667
Os04g0518200		Conserved hypothetical protein.		-0.59999	-0.836672	-0.424352
Os05g0452500		Conserved hypothetical protein.		-0.599925	-1.1799	-0.61441
Os08g0101800		Protein of unknown function DUF821, CAP10-like family protein.		-0.599695	-0.422675	-0.488934
Os07g0481400		NB-ARC domain containing protein.	0	-0.596652	-0.812677	-0.454315
Os11g0482100		Similar to Protein transport protein Sec24-like CEF.		-0.596211	-0.752169	-0.518281
Os05g0168500		Nonaspanin (TM9SF) family protein.		-0.595613	-0.487902	-0.581817
Os10g0321700		Similar to Ribonucleoprotein like protein.		-0.594103	-0.609864	-0.722927
Os01g0232300		Similar to TRZ3 (TRNASE Z 3); 3'-tRNA processing endoribonuclease/ catalytic.		-0.593857	-0.504239	-0.510778
Os03g0733400		Zinc finger, BED-type predicted domain containing protein.		-0.593765	-0.650867	-0.691071
Os01g0695600		Pyridoxal phosphate-dependent enzyme, beta subunit domain containing protein.		-0.593408	-0.66002	-0.701403
Os01g0931300		Tafazzin family protein.		-0.592761	-0.541498	-0.645857
Os09g0365300		NB-ARC domain containing protein.		-0.592499	-0.624259	-0.580002
Os05g0509300		Pseudouridine synthase, TruD domain containing protein.		-0.59231	-0.458595	-0.437908
Os03g0227800		Conserved hypothetical protein.		-0.591523	-0.450816	-0.712175
Os11g0533800		Cyclin-like F-box domain containing protein.	OsFbox602, Os_F0512	-0.590849	-0.421731	-0.606929
Os11g0206700		Guanine nucleotide binding protein (G-protein), alpha subunit family protein.		-0.59049	-0.599713	-0.542797
Os07g0227800		Similar to ubiquinone biosynthesis protein ubiB.		-0.589521	-0.871298	-0.646546
Os06g0726600		Conserved hypothetical protein.	OsMac1	-0.588483	-0.566683	-0.748652
Os05g0182800		Glutaminyl-tRNA synthetase, class Ic domain containing protein.		-0.587806	-0.492727	-0.592651
Os03g0737900		Similar to predicted protein.		-0.587297	-0.526947	-0.670187
Os01g0230200		Basic helix-loop-helix dimerisation region bHLH domain containing protein.	OsbHLH074	-0.586574	-0.706944	-0.491227
Os12g0145700		Pyruvate kinase family protein.		-0.58519	-0.449204	-0.551143
Os02g0736600		DEAD-like helicase, N-terminal domain containing protein.		-0.584385	-0.634937	-0.462834
Os07g0497100		Chromodomain, helicase/ATPase, and DNA-binding domain (CHD) protein, Chromatin-remodeling factor, Mi-2-like protein, Crown root development, Chloroplast development in adaxial mesophyll, Maintenance of H3K4me3		-0.58347	-0.71937	-0.517138
Os06g0179800		Leucine-rich repeat, N-terminal domain containing protein.		-0.582141	-0.869211	-0.596583
Os11g0602800		Galactose oxidase/kelch, beta-propeller domain containing protein.		-0.582116	-0.566433	-0.519845
Os05g0305600		Similar to Rp3-like disease resistance protein.		-0.581092	-0.622427	-0.566005
Os02g0743100		Zinc finger, RING/FYVE/PHD-type domain containing protein.		-0.581021	-0.645354	-0.466663
Os01g0128800		Similar to plant synaptotagmin.		-0.580328	-0.555656	-0.616006
Os02g0742000		Transcription elongation factor, TFIIS/CRSP70, N-terminal domain containing protein.		-0.579961	-0.588907	-0.515608
Os05g0581800		Protein of unknown function DUF1296 family protein.		-0.579197	-0.720786	-0.442248
Os10g0390100		Non-protein coding transcript.		-0.578724	-0.544563	-0.43001
Os04g0408700		Similar to DNA-binding protein S1FA1.		-0.57824	-0.685004	-0.557812
Os03g0694900		Similar to Valyl-tRNA synthetase (EC 6.1.1.9) (Valine--tRNA ligase) (ValRS).	OsValRS1	-0.577895	-0.477805	-0.448903
Os07g0616500		Similar to (S)-2-hydroxy-acid oxidase, peroxisomal (EC 1.1.3.15) (Glycolate oxidase) (GOX) (Short chain alpha-hydroxy acid oxidase).	OsGLO5	-0.577811	-0.521949	-0.659988
Os03g0698350		Similar to ATATH9 (ABC2 homolog 9).		-0.57737	-0.575505	-0.620837
Os10g0369000		Similar to Glutamyl-tRNA synthetase.		-0.577311	-0.445645	-0.391769
Os08g0200400		K Homology domain containing protein.		-0.576492	-0.834333	-0.576999
Os02g0557200		Similar to Auxin response factor 1.	OsARF7	-0.575823	-0.61746	-0.434249
Os03g0197000		Di-trans-poly-cis-decaprenylcistransferase-like domain containing protein.		-0.575486	-0.787406	-0.584976
Os05g0134300		Protein of unknown function DUF408 family protein.		-0.575352	-0.494335	-0.552174
Os10g0423000		Conserved hypothetical protein.		-0.57486	-0.579269	-0.607349
Os05g0102800		Similar to AML1.		-0.574565	-0.901544	-0.603636
Os07g0444000		Similar to Non-lysosomal glucosylceramidase.		-0.573795	-0.778905	-0.500628
Os04g0485300		Glucose-6-phosphate dehydrogenase.	OsG6PDH2	-0.573689	-0.621377	-0.882688
Os04g0497600		Lupus La protein family protein.		-0.572802	-0.410563	-0.401568
Os02g0274100		3-hydroxyacyl-CoA dehydrogenase, Multifunctional protein, RNA- and microtubule-binding protein, Salicylic acid (SA) biosynthesis, Maintenance of root meristem activity, Beta -oxidation of fatty acids	OsAIM, OsCHD	-0.572533	-0.57061	-0.550915
Os12g0564600		Zinc finger, CCHC-type domain containing protein.	BIP117	-0.572196	-0.686564	-0.468423
Os06g0226000		Similar to Transposase (Fragment).		-0.571975	-0.761659	-0.667745
Os02g0297600		Protein of unknown function DUF707 family protein.		-0.571711	-0.811194	-0.458649
Os01g0115100		Hypothetical conserved gene.		-0.571597	-0.64334	-0.677257
Os04g0485800		Cyclin-like F-box domain containing protein.	OsFbox225, Os_F0540	-0.570868	-0.660544	-0.512314
Os11g0218000		bZIP transcription factor, bZIP-1 domain containing protein.	OsbZIP82	-0.570166	-0.656472	-0.485532
Os05g0506200		KOW domain containing protein.		-0.569966	-1.09967	-0.462383
Os03g0816950		Hypothetical protein.		-0.568544	-0.794504	-0.554294
Os03g0187000		Similar to EMB514.		-0.567571	-0.512371	-0.489336
Os06g0232100		Hypothetical conserved gene.		-0.567331	-0.652137	-0.604812
Os06g0527100		Similar to Cyclic nucleotide-gated channel A (Fragment).	OsCNGC12	-0.567218	-0.779856	-0.3839
Os10g0489000		Similar to FIP1.		-0.566341	-0.845177	-0.519506
Os02g0542400		Conserved hypothetical protein.		-0.564557	-0.618775	-0.551473
Os01g0603000		Similar to Nuclear RNA binding protein A.		-0.563984	-0.442977	-0.591558
Os02g0198200		EF-Hand type domain containing protein.		-0.563435	-0.536069	-0.529481
Os07g0543500		Armadillo-like helical domain containing protein.		-0.562428	-0.563546	-0.652509
Os11g0169100		Sec1-like protein family protein.		-0.561269	-0.464866	-0.64499
Os02g0813500		Glutathione reductase, cytosolic (EC 1.8.1.7) (GR) (GRase).	OsGR2	-0.559635	-0.487683	-0.507001
Os06g0703200		Disease resistance protein domain containing protein.		-0.558236	-0.674407	-0.524886
Os03g0673800		Conserved hypothetical protein.	OsOSCA2.2, OsDDP3	-0.557226	-1.17582	-1.06296
Os10g0419500		Similar to SIPL.		-0.556988	-0.760397	-0.827134
Os03g0825700		Ca<sup>2+</sup> binding protein, Regulation of tapetal cell degradation and pollen formation		-0.555722	-0.581257	-0.489383
Os08g0191150		Non-protein coding transcript.		-0.555572	-0.845761	-0.517615
Os02g0656200		Similar to Ceramide kinase.	OsCERK	-0.555366	-0.523857	-0.452204
Os02g0740300		ATPase, AAA-type, core domain containing protein.		-0.555197	-0.520039	-0.582962
Os10g0471350		Similar to helicase domain-containing protein.		-0.554546	-0.707056	-0.430478
Os12g0136900		Similar to Calcium-transporting ATPase 4, plasma membrane-type (EC 3.6.3.8) (Ca(2+)-ATPase isoform 4).	OsACA9, OsPM12ATP4	-0.553214	-0.664156	-0.477705
Os02g0819300		Hypothetical conserved gene.		-0.552991	-0.623274	-0.499833
Os11g0523800		Similar to Isoform 3 of Auxin response factor 23.	OsARF1	-0.55213	-0.55349	-0.557183
Os05g0471000		Similar to Ser-thr protein kinase (Fragment).	0	-0.551624	-0.792093	-0.6499
Os12g0594300		Hypothetical conserved gene.		-0.551272	-0.67037	-0.39818
Os01g0817700		Similar to 2, 3-bisphosphoglycerate-independent phosphoglycerate mutase (EC 5.4.2.1) (Phosphoglyceromutase) (BPG-independent PGAM) (PGAM-I).		-0.551267	-0.700423	-0.449431
Os04g0446500		Similar to OSIGBa0140O07.15 protein.	OsFKBP58	-0.550947	-0.445994	-0.625783
Os09g0410125		Similar to membrane alanyl aminopeptidase.		-0.550626	-1.04207	-0.452118
Os03g0267600		Protein of unknown function DUF3527 domain containing protein.		-0.550272	-0.605665	-0.488019
Os01g0823600		Conserved hypothetical protein.		-0.549528	-0.655897	-0.604343
Os08g0112500		Similar to Cyclin-dependent protein kinase-like protein.	Orysa;CKL10	-0.548999	-0.490146	-0.646085
Os08g0104300		Similar to RING finger protein 13.		-0.546993	-0.434779	-0.689705
Os09g0515100		Similar to bromodomain protein 103.		-0.546465	-0.709068	-0.411656
Os02g0758100		Similar to LMBR1 integral membrane family protein.		-0.545327	-0.600317	-0.567717
Os08g0135800		Zinc finger, CCCH-type domain containing protein.	OsC3H55	-0.545149	-0.51441	-0.430434
Os01g0977600		Hypothetical conserved gene.		-0.544853	-0.721476	-0.426336
Os07g0662900		Similar to 4-alpha-glucanotransferase (EC 2.4.1.25).	OsDPE2	-0.541539	-0.593104	-0.581984
Os08g0520900		Similar to Isoamylase (Fragment).	OsISA1	-0.541489	-0.7841	-0.498417
Os05g0150300		Similar to Possible global transcription activator SNF2L1 (SWI/SNF related matrix associated actin dependent regulator of chromatin subfamily A member 1).		-0.539654	-0.697085	-0.493756
Os03g0143000		Conserved hypothetical protein.		-0.538509	-0.472726	-0.649229
Os11g0637700		Nucleotide-binding, alpha-beta plait domain containing protein.	RBPA	-0.536931	-0.512401	-0.490817
Os12g0566300		Similar to ATP citrate lyase beta (Fragment).		-0.536501	-0.524841	-0.552824
Os01g0183633		Similar to predicted protein.		-0.535666	-0.604729	-0.628748
Os06g0113900		Major facilitator superfamily, general substrate transporter domain containing protein.		-0.535347	-0.424008	-0.578519
Os03g0596900		GTP-binding signal recognition particle SRP54, G-domain containing protein.		-0.534166	-0.61474	-0.51568
Os06g0281400		Similar to DNA topoisomerase.		-0.533153	-0.632335	-0.56563
Os12g0554400		Tetratricopeptide-like helical domain containing protein.		-0.532675	-0.653787	-0.449109
Os01g0937400		NB-ARC domain containing protein.		-0.532286	-0.991637	-0.459621
Os10g0578800		Similar to LrgB-like family protein, expressed.		-0.532238	-0.496371	-1.02665
Os05g0533600		Starch synthase, Starch biosynthesis	OsSSIVb	-0.532211	-0.697264	-0.634078
Os05g0294600		Pentatricopeptide repeat domain containing protein.		-0.530515	-0.723496	-0.551191
Os04g0637000		Similar to BZIP transcription factor bZIP52.	OsTGAP1, OsbZIP37	-0.529232	-0.415351	-0.533405
Os11g0298400		Protein of unknown function DUF663 domain containing protein.		-0.529177	-0.417323	-0.439113
Os04g0585200		Similar to Glutamate receptor.	OsGLR3.2	-0.528833	-0.601473	-0.672902
Os03g0119500		Callose synthase, Ovary expansion by affecting vascular cell patterning		-0.528746	-0.745824	-0.394328
Os10g0447600		MT-A70 family protein.		-0.527485	-0.56932	-0.576938
Os01g0783800		Serine/threonine protein kinase-related domain containing protein.		-0.527234	-0.725415	-0.492078
Os01g0203000		BZR1, transcriptional repressor family protein.		-0.526569	-0.486902	-0.600815
Os03g0180300		Similar to Ataxin-2 C-terminal region family protein, expressed.		-0.525303	-0.831106	-0.567618
Os05g0151400		AIG1 domain containing protein.		-0.523676	-0.918731	-0.55103
Os04g0498800		Similar to Cell division control protein 48 homolog B (AtCDC48b).		-0.523552	-0.642186	-0.486714
Os02g0738900		Dynamin-related protein, Secondary cell wall cellulose biosynthesis	OsDRP2B	-0.523202	-0.444277	-0.523405
Os02g0542200		Similar to H0525E10.9 protein.		-0.52181	-0.480528	-0.49026
Os12g0443700		Similar to Glu-prolyl-tRNA aminoacyl synthetase (Fragment).		-0.521753	-0.435289	-0.522304
Os02g0678200		SPX-MFS protein, Pi homeostasis	OsSPX-MFS2	-0.519683	-1.21976	-1.01208
Os07g0681500		Ankyrin repeat containing protein.	OsMED5_3	-0.519184	-0.460795	-0.641864
Os11g0546000		Similar to RNase L inhibitor-like protein.	OsABCE2	-0.5186	-0.441038	-0.554421
Os03g0189600		Similar to Alcohol dehydrogenase.		-0.517943	-0.375933	-0.687284
Os06g0271900		Hypothetical protein.		-0.516918	-0.59182	-0.525066
Os01g0919600		Protein of unknown function DUF707 family protein.		-0.51636	-0.394343	-0.584504
Os01g0893400		Zinc finger, TAZ-type domain containing protein.	0	-0.513786	-0.574513	-0.529438
Os12g0136200		Similar to RNA recognition motif family protein, expressed.		-0.513207	-0.698579	-0.534319
Os01g0363900		Similar to HASTY.	OsWAK5	-0.51243	-0.454759	-0.44618
Os06g0480000		Zinc finger, RING/FYVE/PHD-type domain containing protein.	OsPUB74	-0.512036	-0.568791	-0.407862
Os02g0167700		Armadillo-like helical domain containing protein.		-0.509901	-0.500633	-0.469267
Os03g0387500		Conserved hypothetical protein.		-0.509777	-0.638719	-0.548671
Os05g0243200		Similar to Ribosomal protein L13.	orf160	-0.509696	-0.658022	-0.376667
Os08g0305300		Protein prenyltransferase domain containing protein.		-0.507159	-0.685727	-0.449541
Os01g0899500		Hypothetical conserved gene.		-0.506867	-0.564578	-0.505318
Os05g0349000		Protein of unknown function DUF3355 domain containing protein.		-0.504954	-0.69103	-0.652569
Os01g0952300		Similar to Ran GTPase binding / chromatin binding / zinc ion binding.		-0.504559	-0.759576	-0.491538
Os03g0666500		Similar to Ras-related protein RHA1.	OsRab5B1	-0.502546	-0.63158	-0.504746
Os11g0170200		Protein of unknown function DUF869, plant family protein.		-0.502333	-0.719683	-0.553507
Os01g0716400		Violaxanthin de-epoxidase family protein.		-0.500947	-0.496239	-0.712153
Os04g0507500		Armadillo-like helical domain containing protein.		-0.500735	-0.466746	-0.404778
Os03g0822700		Armadillo-like helical domain containing protein.		-0.500307	-0.444286	-0.560142
Os11g0207100		Similar to SEU3A protein.		-0.499678	-0.631162	-0.531784
Os05g0230600		DUF1620-containing and WD40-like repeat protein, Scaffold protein for assembly of the restoration of fertility complex	RFC3	-0.499259	-0.478461	-0.48609
Os09g0297000		Similar to Ferrochelatase.		-0.499023	-0.492053	-0.472589
Os08g0520300		Similar to Oligouridylate binding protein.		-0.498743	-0.480854	-0.445646
Os02g0164900		Similar to Auxin response factor 3.	OsARF6	-0.498098	-0.567461	-0.629422
Os11g0103700		EF-Hand type domain containing protein.		-0.497838	-0.612997	-0.653147
Os02g0806600		ENTH/VHS domain containing protein.		-0.497743	-0.588149	-0.521781
Os09g0101100		HhH-GPD domain domain containing protein.		-0.497296	-0.547504	-0.514814
Os05g0105000		Similar to Methionine S-methyltransferase (EC 2.1.1.12) (AdoMet:Met S- methyltransferase) (Hv-MMT1).		-0.496615	-0.502198	-0.473921
Os04g0657500		Lipase, class 3 family protein.		-0.495987	-0.545329	-0.815154
Os02g0281000		RmlC-like jelly roll fold domain containing protein.	OsPP23	-0.494916	-0.8417	-0.654921
Os02g0796500		B-type response regulator, Cytokinin signaling	OsRR23, OsRRB5	-0.492873	-0.470865	-0.684603
Os07g0689950		BRCT domain containing protein.		-0.491895	-0.658535	-0.464666
Os01g0819466		Non-protein coding transcript.		-0.490534	-0.699924	-0.441942
Os02g0135900		Similar to 5'-AMP-activated protein kinase beta-1 subunit-related.		-0.489859	-0.803086	-0.471573
Os05g0562400		DDT domain containing protein.		-0.489514	-0.522837	-0.451642
Os06g0215300		S-adenosylmethionine synthetase domain containing protein.	OsPOP12	-0.489492	-0.407887	-0.481526
Os04g0502200		Transport protein Trs120 domain containing protein.		-0.488344	-0.453502	-0.473813
Os01g0772600		Similar to Casein kinase-like protein.		-0.487525	-0.702883	-0.44751
Os08g0162000		Similar to transmembrane 9 superfamily protein member 1.		-0.487227	-0.450721	-0.668011
Os05g0463400		PWWP domain containing protein.		-0.487196	-0.553332	-0.675047
Os02g0195500		Protein of unknown function DUF1680 family protein.		-0.486962	-0.8243	-0.53349
Os01g0653800		Similar to predicted protein.		-0.486371	-0.575677	-0.455779
Os08g0224700		Similar to 26S proteasome subunit RPN2a.	OsRpn2a	-0.485659	-0.569336	-0.429114
Os12g0208900		Similar to ZF-HD protein dimerisation region containing protein, expressed.	OsZHD3	-0.485655	-0.996471	-0.601421
Os12g0479400		Similar to Auxin response factor 1.	OsARF24	-0.485421	-0.501569	-0.520337
Os05g0159000		HECT domain containing protein.		-0.485039	-0.552431	-0.428829
Os03g0729900		BSD domain containing protein.	0	-0.483662	-0.604305	-0.508936
Os12g0236700		Chaperonin Cpn60/TCP-1 family protein.		-0.483504	-0.659383	-0.502576
Os04g0442000		Similar to Auxin response factor 2 (ARF1-binding protein) (ARF1-BP).	OsARF9	-0.482197	-0.510964	-0.341358
Os05g0561600		Protein of unknown function DUF1421 domain containing protein.		-0.481851	-0.605875	-0.522897
Os08g0359500		CS domain domain containing protein.		-0.478361	-0.373445	-0.417425
Os06g0355800		Hypothetical protein.		-0.478244	-0.605791	-0.463079
Os10g0363300		Acetyl-CoA carboxylase (EC 6.4.1.2)		-0.478231	-0.446829	-0.593277
Os03g0862100		Conserved hypothetical protein.		-0.478227	-0.691181	-0.46598
Os01g0348600		Similar to MFP2 (Fatty acid multifunctional protein) (AtMFP2).		-0.477283	-0.428321	-0.481436
Os06g0287500		Similar to Nbs1-ON.	0	-0.477047	-0.634992	-0.575112
Os05g0579900		Similar to 10A19I.11.	OsDjC52	-0.4766	-0.651355	-0.538398
Os02g0118200		Similar to Protein kinase APK1B, chloroplast precursor (EC 2.7.1.-).	OsRLCK60	-0.476038	-0.610475	-0.437431
Os07g0693700		WD40 repeat-like domain containing protein.		-0.47339	-0.639886	-0.390978
Os01g0895600		Similar to Calreticulin-3.		-0.472793	-0.544768	-0.618211
Os01g0909200		DEAD-like helicase, N-terminal domain containing protein.	OsDCL3a	-0.471405	-0.534666	-0.459548
Os03g0619400		Chaperone, tailless complex polypeptide 1 domain containing protein.		-0.471382	-0.427863	-0.471169
Os12g0538900		Armadillo-type fold domain containing protein.		-0.471348	-0.529218	-0.395069
Os10g0575200		Similar to GRV2 (GRAVITROPISM DEFECTIVE 2); binding / heat shock protein binding.	OsDjC74	-0.471162	-0.664073	-0.493096
Os03g0719500		Hypothetical conserved gene.		-0.470236	-0.653889	-0.542585
Os03g0230500		Inositol 1, 3,4-trisphosphate 5/6-kinase, Drought and salt tolerance, Negative regulator of osmotic stress signaling	OsITPK2, OsDSM3, OsITL1	-0.469953	-0.648124	-0.508175
Os07g0147800		Hypothetical conserved gene.		-0.468858	-0.778986	-0.466028
Os10g0579300		NADH:ubiquinone oxidoreductase 17.2 kD subunit family protein.		-0.467903	-0.420947	-0.545773
Os05g0583500		Phox-associated domain domain containing protein.		-0.466385	-0.615196	-0.500602
Os12g0438400		Hypothetical conserved gene.		-0.465601	-0.671673	-0.492067
Os11g0602200		Similar to SET domain protein SDG111.	OsSET41, OsSUVH1	-0.465514	-0.483831	-0.433582
Os08g0556000		Similar to YTH domain protein 2 (High-glucose-regulated protein 8) (NY-REN-2 antigen) (CLL-associated antigen KW-14).		-0.465494	-0.596334	-0.515639
Os05g0117600		Hypothetical conserved gene.		-0.464366	-0.5192	-0.413872
Os05g0458400		Similar to AAA-metalloprotease FtsH.	OsFtsH8	-0.463978	-0.475169	-0.416412
Os11g0303500		Nucleotide-binding, alpha-beta plait domain containing protein.		-0.46316	-0.539977	-0.397012
Os01g0228800		Conserved hypothetical protein.		-0.462469	-0.485706	-0.480695
Os04g0615100		Similar to Lecithine cholesterol acyltransferase-like protein.		-0.462405	-0.487085	-0.439841
Os06g0564500		Cysteine synthase (EC 4.2.99.8).		-0.462318	-0.806554	-0.545456
Os12g0438300		NB-ARC domain containing protein.		-0.461837	-0.522402	-0.539084
Os01g0106900		Similar to 1-deoxy-D-xylulose 5-phosphate reductoisomerase (Fragment).	OsDXR	-0.458533	-0.710156	-0.369452
Os05g0240200		Similar to NB-ARC domain containing protein, expressed.	OsWD40-115	-0.458444	-0.472953	-0.620841
Os02g0489525		Hypothetical protein.		-0.458425	-0.470407	-0.631565
Os03g0833300		Similar to Squamosa promoter-binding-like protein 6.	OsSPL6	-0.458173	-0.496589	-0.523479
Os05g0545000		Similar to Phosphatidylinositol transfer-like protein IV.	OsSNDP6	-0.456192	-0.576198	-0.413929
Os05g0310500		Similar to Cathepsin B-like cysteine protease.	OsCatB	-0.455406	-0.479511	-0.525058
Os05g0545600		Forkhead-associated (FHA) domain domain containing protein.		-0.45533	-0.607824	-0.661752
Os01g0816400		Similar to microtubule organization protein.		-0.454858	-0.765275	-0.388161
Os11g0572100		Similar to DNA ligase (EC 6.5.1.2).	RFC1	-0.454279	-0.603758	-0.46512
Os02g0615800		Protein kinase, core domain containing protein.	OsLP2	-0.453222	-0.700751	-0.462958
Os10g0485100		Thioredoxin fold domain containing protein.		-0.452807	-0.491506	-0.414607
Os09g0258000		Cellular retinaldehyde-binding/triple function, C-terminal domain containing protein.		-0.45193	-0.315273	-0.520974
Os01g0169500		Armadillo-type fold domain containing protein.		-0.45124	-0.555473	-0.423664
Os01g0179400		Amyloplast-localized protein containing DUF490, Regulation of starch grain sizes	0	-0.45103	-0.563816	-0.455772
Os04g0404800		Similar to H0502B11.5 protein.		-0.45028	-0.669899	-0.456373
Os02g0794900		Formin-like protein 7.		-0.449814	-0.518523	-0.481782
Os03g0839100		Ubiquinone biosynthesis hydroxylase, UbiH/UbiF/VisC/COQ6 domain containing protein.		-0.449673	-0.374029	-0.43095
Os03g0754800		Mitochondrial substrate carrier family protein.		-0.448984	-0.539347	-0.515159
Os01g0376700		Similar to Sucrose-phosphatase (EC 3.1.3.24).		-0.447647	-0.869	-0.433532
Os05g0541700		Protein of unknown function DUF1639 domain containing protein.		-0.447358	-0.552331	-0.543212
Os04g0628600		Conserved hypothetical protein.		-0.446283	-0.454777	-0.519143
Os04g0471400		Similar to H0418A01.7 protein.		-0.445057	-0.454061	-0.430548
Os05g0534600		CASC3/Barentsz eIF4AIII binding domain containing protein.		-0.444046	-0.427359	-0.574904
Os06g0143900		Similar to Coatomer protein complex, beta prime; beta'-COP protein.	OsWD40-125	-0.4437	-0.396362	-0.426322
Os01g0109700		Similar to Paired amphipathic helix repeat-containing protein / transcription regulator-related.		-0.442042	-0.603525	-0.344724
Os03g0588200		Frigida-like family protein.		-0.440698	-0.791063	-0.41847
Os06g0663900		Similar to (RAP Annotation release2) Protein kinase-like domain containing protein.	OsRLCK212	-0.44036	-0.468243	-0.491818
Os03g0121800		Dicer-like protein, miRNA biogenesis, Reguration of development	OsDCL1	-0.440182	-0.731393	-0.522029
Os03g0248600		Similar to Enolase 2 (EC 4.2.1.11) (2-phosphoglycerate dehydratase 2) (2-phospho- D-glycerate hydro-lyase 2).	OsEno2	-0.439311	-0.461763	-0.613541
Os08g0135900		Similar to Tryptophan synthase beta chain 1 (EC 4.2.1.20) (Orange pericarp 1) (Fragment).	TS	-0.437917	-0.475348	-0.477087
Os11g0207000		LIM binding protein domain containing protein.	OsSEU1	-0.437896	-0.735814	-0.429111
Os05g0148700		Armadillo-type fold domain containing protein.		-0.436723	-0.62342	-0.422831
Os05g0571000		WD40 repeat-like domain containing protein.	OsWD40-123, OsSPA1	-0.436556	-0.620665	-0.387467
Os02g0244300		Peptidase C19, ubiquitin carboxyl-terminal hydrolase 2 family protein.		-0.436552	-0.502798	-0.432983
Os02g0714500		Tetratricopeptide-like helical domain containing protein.		-0.434846	-0.499595	-0.406063
Os10g0135200		Ras GTPase family protein.		-0.433776	-0.514134	-0.57416
Os07g0522600		Similar to glutamate-gated kainate-type ion channel receptor subunit GluR5.	OsGLR3.7	-0.433192	-0.441305	-0.512146
Os03g0795100		Conserved hypothetical protein.		-0.432703	-0.408154	-0.606676
Os08g0379000		RNA-processing protein, HAT helix domain containing protein.		-0.430726	-0.541549	-0.485056
Os10g0167300		Similar to Enolase 2 (EC 4.2.1.11) (2-phosphoglycerate dehydratase 2) (2-phospho- D-glycerate hydro-lyase 2).	OsEE1, OsENO1	-0.430462	-0.347448	-0.438963
Os01g0920200		Similar to E(Y)2 homolog (DC6) (Enhancer of yellow 2 homolog).		-0.427304	-0.526753	-0.510121
Os05g0200500		Similar to Casein kinase-like protein.		-0.42596	-0.394727	-0.591459
Os04g0599100		Similar to OSJNba0093F12.23 protein.		-0.425411	-0.497323	-0.440822
Os02g0719100		Similar to Fimbrin/plastin-like (Fragment).		-0.425303	-0.435332	-0.492417
Os02g0464500		Protein of unknown function DUF3133 domain containing protein.		-0.425117	-0.50743	-0.517164
Os05g0445500		Similar to Acidic ribosomal protein (Fragment).	0	-0.423206	-0.366876	-0.375584
Os02g0167500		RNA recognition motif domain domain containing protein.		-0.422435	-0.538187	-0.354915
Os07g0412100		Similar to Granule-bound starch synthase Ib, chloroplast precursor (EC 2.4.1.21) (Fragment).	GBSS2	-0.422104	-0.539748	-0.412111
Os02g0464400		Similar to D-mannose binding lectin family protein, expressed.		-0.420231	-0.386949	-0.391156
Os01g0955700		CRT-like transporter, Glutathione homeostasis, Arsenic tolerance		-0.41894	-0.514574	-0.494759
Os06g0470800		Protein of unknown function DUF159 family protein.		-0.415009	-0.663411	-0.587177
Os01g0144340		Similar to Actin-related protein 5.		-0.413619	-0.428662	-0.547457
Os09g0344800		Protein of unknown function DUF81 family protein.		-0.413446	-0.532113	-0.517827
Os11g0163600		Similar to Tubby-like F-box protein 13.	OsTLP6, OsTLP13	-0.412984	-0.499224	-0.46901
Os12g0144000		Similar to predicted protein.		-0.412587	-0.475912	-0.397791
Os01g0310500		Protein kinase, catalytic domain domain containing protein.	OsRLCK31	-0.412219	-0.632879	-0.435061
Os02g0700000		EF-HAND 1 domain containing protein.		-0.40997	-0.455055	-0.383387
Os03g0711800		Similar to IRE homolog 1 (Fragment).		-0.406745	-0.47098	-0.395962
Os02g0665000		Similar to Malic enzyme.		-0.404161	-0.531559	-0.368947
Os06g0248400		Poly(ADP-ribose) polymerase, catalytic region domain containing protein.		-0.401433	-0.471349	-0.348616
Os03g0356700		Villin, villin/gelsolin superfamily protein, Actin binding protein, Regulation of plant architecture	OsVLN2	-0.400393	-0.528324	-0.437141
Os06g0669400		Similar to Cell division protease ftsH homolog 2, chloroplastic.	OsFtsH2	-0.400277	-0.60995	-0.36264
Os02g0508500		Conserved hypothetical protein.		-0.397052	-0.610641	-0.438105
Os02g0777100		DENN domain containing protein.		-0.39543	-0.622834	-0.376137
Os07g0668700		Lipase, class 3 family protein.		-0.394848	-0.445882	-0.631773
Os06g0135000		Similar to Hypersensitive-induced reaction protein 4.		-0.394701	-0.436925	-0.345698
Os12g0586600		Similar to Plasma membrane Ca2+-ATPase.	OsACA10, OsPM12ATP	-0.393963	-0.529769	-0.377341
Os08g0398700		Peptidase M1, membrane alanine aminopeptidase family protein.		-0.392821	-0.387563	-0.386383
Os09g0280600		Meiotic nuclear division protein 1 domain containing protein.	MND1	-0.389578	-0.461287	-0.494907
Os05g0595100		Uridine-diphospho-(UDP)-glucose 4-epimerase, Cell wall carbohydrate partitioning during nitrogen (N) limitation	OsUGE1	-0.389285	-0.416208	-0.454204
Os02g0820000		Similar to Serine/threonine protein phosphatase PP1 isozyme 2 (EC 3.1.3.16).	OsPP41	-0.388117	-0.47938	-0.434194
Os06g0186700		Biopterin transport-related protein BT1 family protein.		-0.385702	-0.519597	-0.516606
Os01g0633200		Similar to X1 (Fragment).	X1	-0.38562	-0.510809	-0.428848
Os01g0818000		Auxin efflux carrier domain containing protein.	OsPILS6a	-0.385298	-0.478897	-0.523969
Os07g0667000		Similar to Tubby-like protein 3.	OsTLP7	-0.384792	-0.587902	-0.394438
Os01g0337600		Similar to predicted protein.		-0.383576	-0.548679	-0.362052
Os04g0614600		Similar to Viroid RNA-binding protein (Fragment).	Osl2	-0.383414	-0.581685	-0.41187
Os01g0921200		Mannosyl-oligosaccharide glucosidase, N-glycan formation, Auxin-mediated root development	OsMOGS	-0.383212	-0.455267	-0.399099
Os05g0543700		Similar to Chaperone protein dnaJ.	OsDjC51	-0.382717	-0.441178	-0.4218
Os03g0161800		Similar to SIPL.	Sip2A, OsARD2, IDI1	-0.380245	-0.45106	-0.329742
Os12g0190000		Similar to VTC2.	OsGGP	-0.378568	-0.741957	-0.486847
Os07g0645400		Similar to NADH dehydrogenase.	0	-0.377572	-0.416478	-0.52484
Os07g0637300		Similar to Pyruvate dehydrogenase kinase.	Ospdhk2	-0.377113	-0.434197	-0.445755
Os02g0810100		Ankyrin repeat containing protein.		-0.375905	-0.517788	-0.392177
Os02g0760300		Similar to Immunophilin.	OsFKBP12	-0.37283	-0.676378	-0.395408
Os08g0290000		Pentatricopeptide repeat domain containing protein.		-0.372337	-0.433235	-0.411517
Os06g0643900		Purple acid phosphatase (EC:3.1.3.2), Regulation of phosphate remobilization, Utilization of organic phosphorus	OsPAP26	-0.369847	-0.446376	-0.381584
Os03g0831800		Similar to Sec13p.	OsWD40-95	-0.369468	-0.436137	-0.427626
Os08g0427900		Similar to Hin19 (Fragment).		-0.368455	-0.50927	-0.379282
Os11g0446500		Similar to Phospholipid-translocating P-type ATPase, flippase family protein, expressed.		-0.367136	-0.590901	-0.392164
Os03g0348800		Conserved hypothetical protein.		-0.360114	-0.592226	-0.391834
Os02g0599700		Protein phosphatase 2C, manganese/magnesium aspartate binding site domain containing protein.	OsPP29	-0.359462	-0.428146	-0.428662
Os09g0567300		Monodehydroascorbate reductase, Tolerance to ROS-induced oxidative stress	OsMDAR3	-0.356668	-0.428815	-0.306227
Os06g0670000		Similar to Molybdenum cofactor sulfurase.		-0.354898	-0.440609	-0.466311
Os06g0702500		Ribosomal protein S5 domain 2-type fold domain containing protein.	OsARA1	-0.34915	-0.339969	-0.473876
Os09g0250700		ABC-1 domain containing protein.		-0.347876	-0.652129	-0.342527
Os08g0390000		Moesin domain containing protein.	BIP131	-0.347373	-0.455501	-0.394093
Os01g0871200		Zinc finger, C2H2-type domain containing protein.	OsbHLH033, OsZFP	-0.346824	-0.626567	-0.374851
Os10g0316400		Conserved hypothetical protein.		-0.345724	-0.497114	-0.42497
Os03g0749800		Similar to Tousled-like protein kinase.		-0.344158	-0.389616	-0.483475
Os07g0447800		Alpha-D-phosphohexomutase, alpha/beta/alpha I, II and III domain containing protein.		-0.342257	-0.430404	-0.376517
Os11g0139500		Similar to RNA recognition motif family protein, expressed.		-0.339776	-0.539388	-0.390174
Os02g0301800		NB-ARC domain containing protein.		-0.335964	-0.472407	-0.367849
Os02g0622100		Casein kinase I, Low temperature tolerance, Root development, Hormone sensitivity	OsCKI1, OsLTRPK1	-0.333965	-0.59102	-0.476806
Os04g0486600		Similar to Glyceraldehyde-3-phosphate dehydrogenase, cytosolic 3 (EC 1.2.1.12).	OsGapC2	-0.333554	-0.334857	-0.426998
Os03g0227000		Similar to Coatomer gamma subunit (Gamma-coat protein) (Gamma-COP).		-0.332279	-0.355919	-0.356523
Os04g0390500		Similar to OSIGBa0132D06.2 protein.	OsYSL6	-0.326613	-0.460003	-0.418806
Os03g0351500		Similar to Superoxide dismutase.	OsSOD1, OsCSD2	-0.307118	-0.335548	-0.431735
Os07g0492000		Nucleoside diphosphate kinase, Cell elongation process in coleoptile	OsNDPK1	-0.301483	-0.325465	-0.40841
Os03g0752700		Heat shock protein DnaJ, N-terminal domain containing protein.	OsDjC33	-0.288447	-0.482848	-0.344874
Os05g0372100		Similar to protein kinase family protein.	OsRLCK185	-0.284924	-0.532243	-0.326392
Os03g0101600		Similar to Oxidoreductase, zinc-binding dehydrogenase family protein, expressed.		-0.236083	-0.451484	-0.40507
